# Supplementary material for: Pseudomonas syringae on Plants in Iceland Has Likely Evolved for Several Million Years Outside the Reach of Processes That Mix This Bacterial Complex across Earth’s Temperate Zones
Source: Pathogens. 2022 Mar 15;11(3):357. doi: 10.3390/pathogens11030357 (PMC8951587; doi:10.3390/pathogens11030357)
Supplement: Supplementary file 1 [file pathogens-11-00357-s001.zip]

Archive with 4 entries (4 files):
- Morris_MDPI_IcelandicPs_Suppl_Fig_S1_definitive_12Mar22.pdf
- Morris_MDPI_IcelandicPs_Suppl_Fig_S2_Definitive_12Mar22.xlsx
- Morris_MDPI_IcelandicPs_Suppl_Tab_S1_Definitive_11Mar22.xlsx
- Morris_MDPI_IcelandicPs_Suppl_Tab_S2_definitive_21Mar22.xlsx
