# Supplementary material for: Pseudomonas syringae on Plants in Iceland Has Likely Evolved for Several Million Years Outside the Reach of Processes That Mix This Bacterial Complex across Earth’s Temperate Zones
Source: Pathogens. 2022 Mar 15;11(3):357. doi: 10.3390/pathogens11030357 (PMC8951587; doi:10.3390/pathogens11030357)
Supplement: Supplementary file 1 [file pathogens-11-00357-s001.zip › Morris_MDPI_IcelandicPs_Suppl_Fig_S2_Definitive_12Mar22.xlsx]

## Sheet: GraphicalSources
Supplementary Figure S2. Graphical representation of source categories of haplotypes of strains of Pseudomonas syringae from Iceland and from reference collections used in this study. Haplotypes of the citrate synthase (cts) partial gene sequence are described in Supplementary Tables S1 and S2.
				Morris et al. Pseudomonas syringae on plants in Iceland has likely evolved for several million years outside the reach of processes that mix this bacterial complex across Earth’s temperate zones. MDPI Pathogens 2022.
	A																																								B
	Reference strains																																								Icelandic strains
													country of isolation																					substrate of isolation											plant type
	cts haplotype containing at leat 2 strains	AUS	BRA	CAN	CHE	CHL	DEU	ESP	ETH	FRA	GBR	GRC	HUN	IND	IRN	ITA	JPN	KOR	MAR	MEX	MWI	NPL	NZL	POL	PRC	PRT	USA	Yugoslavia		Biofilm	Cloud	Freshwater	Groundwater	Irrigation water	Leaf litter	Plant	Rain	Snowfall	Snowpack		lineage	cts haplotype	monocot	dicot	moss	fern	litter		Boreal Heath
	101				2					53	1					1	1		2				12			1	4			9		32	1	2	4	15	3	7	4		L02.1	ISL0429
	102									10													1									8		1		1	1					ISL0439
	103									2		1					1																2			2						ISL0450
	104				2					11													1				1			1		5	1		3		1	2	2			Iceland_23
	105									3																						3										Iceland_24
	106									5																				1		2			1				1			Iceland_22
	107									9													1									4		2			1		3			Iceland_20
	108									2																						1							1			EG2019_15
	109									2																									1				1			Iceland_21
	110									1							1																			2						EG2022_05
	111				1					15													3							7		5		4			2	1				EG2022_01
	112									1													1									2										EG2022_28
	113									12						1														4		3		1		1	2		2
	114									1														1			1									2	1				L06.1	Iceland_25
	115									2																	1					2							1			Iceland_26
	116				1					20																				2		6		1	3	1	2	1	5
	117									12																	1			1		4		3		1	2		2		L01.1	ISL081
	118									12						1							1									5	1	1	1	1	1		4			ISL082
	119									3																								1			2
	120									10																				1		8							1		L01.2	Iceland_28
	121		1							21						2														4		8		1	1	3	2		5			SU2003_30
	122									18													1							1		5	2	5		1	1	4				Iceland_27
	123																										2					2										EG2011_19
	124									9																	3			3		2	1	2		2	2					Iceland_29
	125																										2			1		1										EG2016_19
	126									10																				2		5	1	1			1
	127									10																				1			3	1			5				L04.1	Iceland_18
	128									9						1														1		3		3		3						Iceland_19
	129									24						1											4			5		7	1	5		8	2		1
	130													1			1																			2					L10.1	Iceland_15
	131				1				1	2		1					10				1	2					3									19	1	1				EG2002_28
	132									1	1						3										1								1	5						Iceland_17
	133									2																										1			1			EG2022_10
	134									7	2						1						5				2			2		5		1		7	2					EG2018_25
	135			1						1																									1	1						Iceland_16
	136									10						1											1			1		2			1	2	2		4			EG2019_29
	137									11																				3		2		1		1	1		3
	138									10																				3		4			1				2		L10.2	EG2018_11
	139				1					5													1				1			1		5						1	1			EG2018_18
	140									2																				1		1										Iceland_14
	141									1													1									1					1					EG2018_28
	142									2																				1		1										EG2015_17
	143				1					3																												1	3
	144																										2			2											L10.3	Iceland_13
	145																										5			2		3
	146	3			1					5													2	0												13		1			L10.4	Iceland_10
	147																																			2
	148																																			2					L10.5	ISL0455
	149																										2			1		1
	150											3				2																				5					L10.6	Iceland_11
	151																										3									3						Iceland_12
	152						1										5																			6
	153	1				1				5						5	7	3					3			1										28					L10.7	Iceland_8
	154																1										2									3						Iceland_9
	155				1					1																						1						1
	156				2					17																				1		5			1			2	10		L10.8	EG2007_21
	157									2																						2										EG2008_08
	158									2																						1			1							EG2008_22
	159									10																	2			1		2			3	2			4			EG2008_25
	160									29													1							5	1	9			8		1	1	5			Iceland_7
	161									2																									1				1			Iceland_6
	162									12																				1		1			4		1		5			Iceland_4
	163									8																				1	1	6										EG2002_22
	164									11																				2		3			2				4			Iceland_5
	165				1					7																	1			2		5						1	1			EG2003_20
	166									2																						2										SU2003_19
	167									4																									1				3			Iceland_1
	168				2					48																	2			2		17	1		4			2	26			SU2005_01
	169				1					27						1			1											4		9	1	1	3	3	1	2	6			Iceland_3
	170									5																				5												Iceland_2
	171				1					9						1														1	1	3				2	1	2	1			EG2005_15
	172									1						1																				1	1
	173				2					1																										2	1				L07.1	ISL0427
	174									5																				1		4
	175															4																				4					L13.1	HV2005_10
	176									13																				9		3				1						ISL0014
	177							1		2													1									3				1						Iceland_33
	178									10													1							2		7		2
	179									1																	1					1		1							L13.2	EG2019_16
	180									2													2				5			6		3										Iceland_31
	181									4																								1			3					Iceland_30
	182									12																						1			1				10			Iceland_35
	183									12																						6			2				4			Iceland_34
	184									3																						1							2
	185									3																						1			2						L13.3	Iceland_32
	186									2																									2
	187									5																				1		1			3
	188									2																							2
[truncated: 3 more columns]
