# Supplementary material for: Pseudomonas syringae on Plants in Iceland Has Likely Evolved for Several Million Years Outside the Reach of Processes That Mix This Bacterial Complex across Earth’s Temperate Zones
Source: Pathogens. 2022 Mar 15;11(3):357. doi: 10.3390/pathogens11030357 (PMC8951587; doi:10.3390/pathogens11030357)
Supplement: Supplementary file 1 [file pathogens-11-00357-s001.zip › Morris_MDPI_IcelandicPs_Suppl_Tab_S1_Definitive_11Mar22.xlsx]

## Sheet: S1
Supplementary Table S1. Data set of reference strains used in this study. Citrate synthase partial gene sequence (cts) haplotypes are based on alignment of a 343 bp segment for all strains (reference and Icelandic) used in this study.
				Morris et al. Pseudomonas syringae on plants in Iceland has likely evolved for several million years outside the reach of processes that mix this bacterial complex across Earth’s temperate zones. MDPI Pathogens 2022.
cts haplotype	NameStrain	Country	Habitat	NCBI GenBank accession	other source of sequence data	Description	Sequence
101	601	JPN	Plant	NA	http://genome.ppws.vt.edu/cgi-bin/MLST/home.pl	Berge et al., 2014	CACCGGCCGCTTCACATTTGACCCTGGTTTCATGTCCACGGCCTCTTGCGATTCGAAGATCACCTACATCGATGGTGATAATGGCATTCTGCTACACCGCGGCTACCCGATCGAACAACTGGCCGAGCAGTCCGACTATCTCGAAACCTGCTACCTGCTGCTCAACGGTGAACTGCCCACCGCCGAGCAGAAAGCCCAGTTCGTGGCCGTGGTCAAGAACCACACGATGGTTCACGAACAGCTCAAGACCTTTTTCAACGGTTTCCGCCGCGACGCCCACCCGATGGCCGTCATGTGTGGCGTAGTCGGCGCCCTGTCAGCGTTCTACCACGACTCACTGGACATCAATAACCCGCAGCACCGCGAGATTTCTGCGGTCCGCCTGGTCGCCAAAATGCC…
101	AF0005	NZL	Freshwater	KJ877800		Berge et al., 2014	TCGACGTACGCGGCCTGACCGCCACCGGCCGCTTCACATTTGACCCTGGTTTCATGTCCACGGCCTCTTGCGATTCGAAGATCACCTACATCGATGGTGATAATGGCATTCTGCTACACCGCGGCTACCCGATCGAACAACTGGCCGAGCAGTCCGACTATCTCGAAACCTGCTACCTGCTGCTCAACGGTGAACTGCCCACCGCCGAGCAGAAAGCCCAGTTCGTGGCCGTGGTCAAGAACCACACGATGGTTCACGAACAGCTCAAGACCTTTTTCAACGGTTTCCGCCGCGACGCCCACCCGATGGCCGTCATGTGTGGCGTAGTCGGCGCCCTGTCAGCGTTCTACCACGACTCACTGGACATCAATAACCCGCAGCACCGCGAGATTTCTGCGG…
101	AI0015	NZL	Freshwater	KJ877808		Berge et al., 2014	CCGGTAAGTGGGTCCGGACGTGATCGACGTACGCGGCCTGACCGCCACCGGCCGCTTCACATTTGACCCTGGTTTCATGTCCACGGCCTCTTGCGATTCGAAGATCACCTACATCGATGGTGATAATGGCATTCTGCTACACCGCGGCTACCCGATCGAACAACTGGCCGAGCAGTCCGACTATCTCGAAACCTGCTACCTGCTGCTCAACGGTGAACTGCCCACCGCCGAGCAGAAAGCCCAGTTCGTGGCCGTGGTCAAGAACCACACGATGGTTCACGAACAGCTCAAGACCTTTTTCAACGGTTTCCGCCGCGACGCCCACCCGATGGCCGTCATGTGTGGCGTAGTCGGCGCCCTGTCAGCGTTCTACCACGACTCACTGGACATCAATAACCC…
101	AI0024	NZL	Freshwater	KJ877811		Berge et al., 2014	CGGTAAGTGGGTCCGGACGTGATCGACGTACGCGGCCTGACCGCCACCGGCCGCTTCACATTTGACCCTGGTTTCATGTCCACGGCCTCTTGCGATTCGAAGATCACCTACATCGATGGTGATAATGGCATTCTGCTACACCGCGGCTACCCGATCGAACAACTGGCCGAGCAGTCCGACTATCTCGAAACCTGCTACCTGCTGCTCAACGGTGAACTGCCCACCGCCGAGCAGAAAGCCCAGTTCGTGGCCGTGGTCAAGAACCACACGATGGTTCACGAACAGCTCAAGACCTTTTTCAACGGTTTCCGCCGCGACGCCCACCCGATGGCCGTCATGTGTGGCGTAGTCGGCGCCCTGTCAGCGTTCTACCACGACTCACTGGACATCAATAACCCG…
101	AI0061	NZL	Freshwater	KJ877819		Berge et al., 2014	ATTCTGACCGGTACAGTGGGTCCGGACGTGATCGACGTACGCGGCCTGACCGCCACCGGCCGCTTCACATTTGACCCTGGTTTCATGTCCACGGCCTCTTGCGATTCGAAGATCACCTACATCGATGGTGATAATGGCATTCTGCTACACCGCGGCTACCCGATCGAACAACTGGCCGAGCAGTCCGACTATCTCGAAACCTGCTACCTGCTGCTCAACGGTGAACTGCCCACCGCCGAGCAGAAAGCCCAGTTCGTGGCCGTGGTCAAGAACCACACGATGGTTCACGAACAGCTCAAGACCTTTTTCAACGGTTTCCGCCGCGACGCCCACCCGATGGCCGTCATGTGTGGCGTAGTCGGCGCCCTGTCAGCGTTCTACCACGACTCACTGGACATC…
101	AI0064	NZL	Freshwater	KJ877820		Berge et al., 2014	CATTCTGACCGGTACAGTGGGTCCGGACGTGATCGACGTACGCGGCCTGACCGCCACCGGCCGCTTCACATTTGACCCTGGTTTCATGTCCACGGCCTCTTGCGATTCGAAGATCACCTACATCGATGGTGATAATGGCATTCTGCTACACCGCGGCTACCCGATCGAACAACTGGCCGAGCAGTCCGACTATCTCGAAACCTGCTACCTGCTGCTCAACGGTGAACTGCCCACCGCCGAGCAGAAAGCCCAGTTCGTGGCCGTGGTCAAGAACCACACGATGGTTCACGAACAGCTCAAGACCTTTTTCAACGGTTTCCGCCGCGACGCCCACCCGATGGCCGTCATGTGTGGCGTAGTCGGCGCCCTGTCAGCGTTCTACCACGACTCACTGGACAT…
101	AI0066	NZL	Freshwater	KJ877821		Berge et al., 2014	ATTCTGACCGGTACAGTGGGTCCGGACGTGATCGACGTACGCGGCCTGACCGCCACCGGCCGCTTCACATTTGACCCTGGTTTCATGTCCACGGCCTCTTGCGATTCGAAGATCACCTACATCGATGGTGATAATGGCATTCTGCTACACCGCGGCTACCCGATCGAACAACTGGCCGAGCAGTCCGACTATCTCGAAACCTGCTACCTGCTGCTCAACGGTGAACTGCCCACCGCCGAGCAGAAAGCCCAGTTCGTGGCCGTGGTCAAGAACCACACGATGGTTCACGAACAGCTCAAGACCTTTTTCAACGGTTTCCGCCGCGACGCCCACCCGATGGCCGTCATGTGTGGCGTAGTCGGCGCCCTGTCAGCGTTCTACCACGACTCACTGGACATC…
101	AI0073	NZL	Freshwater	KJ877823		Berge et al., 2014	CTGCATTCTGACCGGTACAGTGGGTCCGGACGTGATCGACGTACGCGGCCTGACCGCCACCGGCCGCTTCACATTTGACCCTGGTTTCATGTCCACGGCCTCTTGCGATTCGAAGATCACCTACATCGATGGTGATAATGGCATTCTGCTACACCGCGGCTACCCGATCGAACAACTGGCCGAGCAGTCCGACTATCTCGAAACCTGCTACCTGCTGCTCAACGGTGAACTGCCCACCGCCGAGCAGAAAGCCCAGTTCGTGGCCGTGGTCAAGAACCACACGATGGTTCACGAACAGCTCAAGACCTTTTTCAACGGTTTCCGCCGCGACGCCCACCCGATGGCCGTCATGTGTGGCGTAGTCGGCGCCCTGTCAGCGTTCTACCACGACTCACTGGA…
101	AI0077	NZL	Freshwater	KJ877826		Berge et al., 2014	CGACGTACGCGGCCTGACCGCCACCGGCCGCTTCACATTTGACCCTGGTTTCATGTCCACGGCCTCTTGCGATTCGAAGATCACCTACATCGATGGTGATAATGGCATTCTGCTACACCGCGGCTACCCGATCGAACAACTGGCCGAGCAGTCCGACTATCTCGAAACCTGCTACCTGCTGCTCAACGGTGAACTGCCCACCGCCGAGCAGAAAGCCCAGTTCGTGGCCGTGGTCAAGAACCACACGATGGTTCACGAACAGCTCAAGACCTTTTTCAACGGTTTCCGCCGCGACGCCCACCCGATGGCCGTCATGTGTGGCGTAGTCGGCGCCCTGTCAGCGTTCTACCACGACTCACTGGACATCAATAACCCGCAGCACCGCGAGATTTCTGCGGT…
101	AI0084	NZL	Freshwater	KJ877829		Berge et al., 2014	CATTCTGACCGGTACAGTGGGTCCGGACGTGATCGACGTACGCGGCCTGACCGCCACCGGCCGCTTCACATTTGACCCTGGTTTCATGTCCACGGCCTCTTGCGATTCGAAGATCACCTACATCGATGGTGATAATGGCATTCTGCTACACCGCGGCTACCCGATCGAACAACTGGCCGAGCAGTCCGACTATCTCGAAACCTGCTACCTGCTGCTCAACGGTGAACTGCCCACCGCCGAGCAGAAAGCCCAGTTCGTGGCCGTGGTCAAGAACCACACGATGGTTCACGAACAGCTCAAGACCTTTTTCAACGGTTTCCGCCGCGACGCCCACCCGATGGCCGTCATGTGTGGCGTAGTCGGCGCCCTGTCAGCGTTCTACCACGACTCACTGGACAT…
101	AI0116	NZL	Freshwater	KJ877834		Berge et al., 2014	CATTCTGACCGGTACAGTGGGTCCGGACGTGATCGACGTACGCGGCCTGACCGCCACCGGCCGCTTCACATTTGACCCTGGTTTCATGTCCACGGCCTCTTGCGATTCGAAGATCACCTACATCGATGGTGATAATGGCATTCTGCTACACCGCGGCTACCCGATCGAACAACTGGCCGAGCAGTCCGACTATCTCGAAACCTGCTACCTGCTGCTCAACGGTGAACTGCCCACCGCCGAGCAGAAAGCCCAGTTCGTGGCCGTGGTCAAGAACCACACGATGGTTCACGAACAGCTCAAGACCTTTTTCAACGGTTTCCGCCGCGACGCCCACCCGATGGCCGTCATGTGTGGCGTAGTCGGCGCCCTGTCAGCGTTCTACCACGACTCACTGGACAT…
101	AI0127	NZL	Freshwater	KJ877835		Berge et al., 2014	ATTCTGACCGGTACAGTGGGTCCGGACGTGATCGACGTACGCGGCCTGACCGCCACCGGCCGCTTCACATTTGACCCTGGTTTCATGTCCACGGCCTCTTGCGATTCGAAGATCACCTACATCGATGGTGATAATGGCATTCTGCTACACCGCGGCTACCCGATCGAACAACTGGCCGAGCAGTCCGACTATCTCGAAACCTGCTACCTGCTGCTCAACGGTGAACTGCCCACCGCCGAGCAGAAAGCCCAGTTCGTGGCCGTGGTCAAGAACCACACGATGGTTCACGAACAGCTCAAGACCTTTTTCAACGGTTTCCGCCGCGACGCCCACCCGATGGCCGTCATGTGTGGCGTAGTCGGCGCCCTGTCAGCGTTCTACCACGACTCACTGGACATC…
101	AI0130	NZL	Freshwater	KJ877836		Berge et al., 2014	CTGACCGGTACAGTGGGTCCGGACGTGATCGACGTACGCGGCCTGACCGCCACCGGCCGCTTCACATTTGACCCTGGTTTCATGTCCACGGCCTCTTGCGATTCGAAGATCACCTACATCGATGGTGATAATGGCATTCTGCTACACCGCGGCTACCCGATCGAACAACTGGCCGAGCAGTCCGACTATCTCGAAACCTGCTACCTGCTGCTCAACGGTGAACTGCCCACCGCCGAGCAGAAAGCCCAGTTCGTGGCCGTGGTCAAGAACCACACGATGGTTCACGAACAGCTCAAGACCTTTTTCAACGGTTTCCGCCGCGACGCCCACCCGATGGCCGTCATGTGTGGCGTAGTCGGCGCCCTGTCAGCGTTCTACCACGACTCACTGGACATCAAT…
101	BOW0004	FRA	Groundwater	KJ877839		Berge et al., 2014	GAGGGCGCTGCCCCCGTCGAGCTGCCAATTCTGACCGGTACAGTGGGTCCGGACGTGATCGACGTACGAGGCCTGACCGCCACCGGCCGCTTCACATTTGACCCTGGTTTCATGTCCACGGCCTCTTGCGATTCGAAGATCACCTACATCGATGGTGATAATGGCATTCTGCTACACCGCGGCTACCCGATCGAACAACTGGCCGAGCAGTCCGACTATCTCGAAACCTGCTACCTGCTGCTCAACGGTGAACTGCCCACCGCCGAGCAGAAAGCCCAGTTCGTGGCCGTGGTCAAGAACCACACGATGGTTCACGAACAGCTCAAGACCTTTTTCAACGGTTTCCGCCGCGACGCCCACCCGATGGCCGTCATGTGTGGCGTAGTCGGCGCCCTGTCA…
101	CC0001	FRA	Plant	KJ877846		Berge et al., 2014	GACGTACGCGGCCTGACCGCCACCGGCCGCTTCACATTTGACCCTGGTTTCATGTCCACGGCCTCTTGCGATTCGAAGATCACCTACATCGATGGTGATAATGGCATTCTGCTACACCGCGGCTACCCGATCGAACAACTGGCCGAGCAGTCCGACTATCTCGAAACCTGCTACCTGCTGCTCAACGGTGAACTGCCCACCGCCGAGCAGAAAGCCCAGTTCGTGGCCGTGGTCAAGAACCACACGATGGTTCACGAACAGCTCAAGACCTTTTTCAACGGTTTCCGCCGCGACGCCCACCCGATGGCCGTCATGTGTGGCGTAGTCGGCGCCCTGTCAGCGTTCTACCACGACTCACTGGACATCAATAACCCGCAGCACCGCGAGATTTCTGCGGTC…
101	CC0023	MAR	Plant	KJ877847		Berge et al., 2014	GTACGCGGCCTGACCGCCACCGGCCGCTTCACATTTGACCCTGGTTTCATGTCCACGGCCTCTTGCGATTCGAAGATCACCTACATCGATGGTGATAATGGCATTCTGCTACACCGCGGCTACCCGATCGAACAACTGGCCGAGCAGTCCGACTATCTCGAAACCTGCTACCTGCTGCTCAACGGTGAACTGCCCACCGCCGAGCAGAAAGCCCAGTTCGTGGCCGTGGTCAAGAACCACACGATGGTTCACGAACAGCTCAAGACCTTTTTCAACGGTTTCCGCCGCGACGCCCACCCGATGGCCGTCATGTGTGGCGTAGTCGGCGCCCTGTCAGCGTTCTACCACGACTCACTGGACATCAATAACCCGCAGCACCGCGAGATTTCTGCGGTCCGC…
101	CC0024	MAR	Plant	KJ877848		Berge et al., 2014	GTACGCGGCCTGACCGCCACCGGCCGCTTCACATTTGACCCTGGTTTCATGTCCACGGCCTCTTGCGATTCGAAGATCACCTACATCGATGGTGATAATGGCATTCTGCTACACCGCGGCTACCCGATCGAACAACTGGCCGAGCAGTCCGACTATCTCGAAACCTGCTACCTGCTGCTCAACGGTGAACTGCCCACCGCCGAGCAGAAAGCCCAGTTCGTGGCCGTGGTCAAGAACCACACGATGGTTCACGAACAGCTCAAGACCTTTTTCAACGGTTTCCGCCGCGACGCCCACCCGATGGCCGTCATGTGTGGCGTAGTCGGCGCCCTGTCAGCGTTCTACCACGACTCACTGGACATCAATAACCCGCAGCACCGCGAGATTTCTGCGGTCCGC…
101	CC0037	FRA	Plant	KJ877849		Berge et al., 2014	GTACGCGGCCTGACCGCCACCGGCCGCTTCACATTTGACCCTGGTTTCATGTCCACGGCCTCTTGCGATTCGAAGATCACCTACATCGATGGTGATAATGGCATTCTGCTACACCGCGGCTACCCGATCGAACAACTGGCCGAGCAGTCCGACTATCTCGAAACCTGCTACCTGCTGCTCAACGGTGAACTGCCCACCGCCGAGCAGAAAGCCCAGTTCGTGGCCGTGGTCAAGAACCACACGATGGTTCACGAACAGCTCAAGACCTTTTTCAACGGTTTCCGCCGCGACGCCCACCCGATGGCCGTCATGTGTGGCGTAGTCGGCGCCCTGTCAGCGTTCTACCACGACTCACTGGACATCAATAACCCGCAGCACCGCGAGATTTCTGCGGTCCGC…
101	CC0125	FRA	Plant	KJ877850		Berge et al., 2014	TACGCGGCCTGACCGCCACCGGCCGCTTCACATTTGACCCTGGTTTCATGTCCACGGCCTCTTGCGATTCGAAGATCACCTACATCGATGGTGATAATGGCATTCTGCTACACCGCGGCTACCCGATCGAACAACTGGCCGAGCAGTCCGACTATCTCGAAACCTGCTACCTGCTGCTCAACGGTGAACTGCCCACCGCCGAGCAGAAAGCCCAGTTCGTGGCCGTGGTCAAGAACCACACGATGGTTCACGAACAGCTCAAGACCTTTTTCAACGGTTTCCGCCGCGACGCCCACCCGATGGCCGTCATGTGTGGCGTAGTCGGCGCCCTGTCAGCGTTCTACCACGACTCACTGGACATCAATAACCCGCAGCACCGCGAGATTTCTGCGGTCCGCC…
101	CC0354	FRA	Plant	KJ877854		Berge et al., 2014	GTACGCGGCCTGACCGCCACCGGCCGCTTCACATTTGACCCTGGTTTCATGTCCACGGCCTCTTGCGATTCGAAGATCACCTACATCGATGGTGATAATGGCATTCTGCTACACCGCGGCTACCCGATCGAACAACTGGCCGAGCAGTCCGACTATCTCGAAACCTGCTACCTGCTGCTCAACGGTGAACTGCCCACCGCCGAGCAGAAAGCCCAGTTCGTGGCCGTGGTCAAGAACCACACGATGGTTCACGAACAGCTCAAGACCTTTTTCAACGGTTTCCGCCGCGACGCCCACCCGATGGCCGTCATGTGTGGCGTAGTCGGCGCCCTGTCAGCGTTCTACCACGACTCACTGGACATCAATAACCCGCAGCACCGCGAGATTTCTGCGGTCCGC…
101	CC0412	FRA	Irrigation_water	KJ877858		Berge et al., 2014	CGACGTACGCGGCCTGACCGCCACCGGCCGCTTCACATTTGACCCTGGTTTCATGTCCACGGCCTCTTGCGATTCGAAGATCACCTACATCGATGGTGATAATGGCATTCTGCTACACCGCGGCTACCCGATCGAACAACTGGCCGAGCAGTCCGACTATCTCGAAACCTGCTACCTGCTGCTCAACGGTGAACTGCCCACCGCCGAGCAGAAAGCCCAGTTCGTGGCCGTGGTCAAGAACCACACGATGGTTCACGAACAGCTCAAGACCTTTTTCAACGGTTTCCGCCGCGACGCCCACCCGATGGCCGTCATGTGTGGCGTAGTCGGCGCCCTGTCAGCGTTCTACCACGACTCACTGGACATCAATAACCCGCAGCACCGCGAGATTTCTGCGGT…
101	CC0440	FRA	Plant	AVEC00000000		Berge et al., 2014	ATGGCTGACAAAAAAGCGCAGTTGATCATCGAGGGCGCTGCCCCCGTCGAGCTGCCAATTCTGACCGGTACAGTGGGTCCGGACGTGGTCGACGTACGCGGCCTGACCGCCACCGGCCGCTTCACATTTGACCCTGGTTTCATGTCCACGGCCTCTTGCGATTCGAAGATCACCTACATCGATGGTGATAATGGCATTCTGCTACACCGCGGCTACCCGATCGAACAACTGGCCGAGCAGTCCGACTATCTCGAAACCTGCTACCTGCTGCTCAACGGTGAACTGCCCACCGCCGAGCAGAAAGCCCAGTTCGTGGCCGTGGTCAAGAACCACACGATGGTTCACGAACAGCTCAAGACCTTTTTCAACGGTTTCCGCCGCGACGCCCACCCGATGGCC…
101	CC0457	FRA	Plant	AVEB00000000		Berge et al., 2014	ATGGCTGACAAAAAAGCGCAGTTGATCATCGAGGGCGCTGCCCCCGTCGAGCTGCCAATTCTGACCGGTACAGTGGGTCCGGACGTGATCGACGTACGCGGCCTGACCGCCACCGGCCGCTTCACATTTGACCCTGGTTTCATGTCCACGGCCTCTTGCGATTCGAAGATCACCTACATCGATGGTGATAATGGCATTCTGCTACACCGCGGCTACCCGATCGAACAACTGGCCGAGCAGTCCGACTATCTCGAAACCTGCTACCTGCTGCTCAACGGTGAACTGCCCACCGCCGAGCAGAAAGCCCAGTTCGTGGCCGTGGTCAAGAACCACACGATGGTTCACGAACAGCTCAAGACCTTTTTCAACGGTTTCCGCCGCGACGCCCACCCGATGGCC…
101	CC1432	USA	Biofilm	KJ877874		Berge et al., 2014	AGCGCTGCCCCCGTCGAGCTGCCAATACTGACCGGTACAGTGGGTCCGGACGTGATCGACGTACGCGGTCTTACCGCCACCGGCCGCTTCACATTTGACCCTGGTTTCATGTCCACGGCCTCTTGCGAGTCGAAGATCACCTACATCGATGGTGACAACGGAATTCTGCTGCACCGCGGCTACCCGATCGAACAACTGGCTGAGCAGTCCGATTACCTCGAGACCTGTTACCTGTTGCTCAACGGCGAGTTGCCAACCGCCGAACAGAAAGCCCAGTTCGTGGCCGTGGTCAAGAACCACACAATGGTTCACGAACAACTCAAGACCTTCTTCAACGGCTTTCGCCGTGACGCCCACCCGATGGCCGTCATGTGCGGTGTAGTCGGCGCCCTGTCGGCG…
101	CC1457	USA	Plant	KJ877880		Berge et al., 2014	CGCTGCCCCGTCGAGCTGCCAATTCTGACCGGTACAGTGGGTCCGGACGTGATCGACGTACGCGGCCTGACCGCCACCGGCCGCTTCACATTTGACCCTGGTTTCATGTCCACGGCCTCTTGCGATTCGAAGATCACCTACATCGATGGTGATAATGGCATTCTGCTACACCGCGGCTACCCGATCGAACAACTGGCCGAGCAGTCCGACTATCTCGAAACCTGCTACCTGCTGCTCAACGGTGAACTGCCCACCGCCGAGCAGAAAGCCCAGTTCGTGGCCGTGGTCAAGAACCACACGATGGTTCACGAACAGCTCAAGACCTTTTTCAACGGTTTCCGCCGCGACGCCCACCCGATGGCCGTCATGTGTGGCGTAGTCGGCGCCCTGTCAGCGTTC…
101	CC1458	USA	Plant	AVEN00000000		Berge et al., 2014	ATGGCTGACAAAAAAGCGCAGTTGATCATCGAGGGCGCTGCCCCCGTCGAGCTGCCAATTCTGACCGGTACAGTGGGTCCGGACGTGATCGACGTACGCGGCCTGACCGCCACCGGCCGCTTCACATTTGACCCTGGTTTCATGTCCACGGCCTCTTGCGATTCGAAGATCACCTACATCGATGGTGATAATGGCATTCTGCTACACCGCGGCTACCCGATCGAACAACTGGCCGAGCAGTCCGACTATCTCGAAACCTGCTACCTGCTGCTCAACGGTGAACTGCCCACCGCCGAGCAGAAAGCCCAGTTCGTGGCCGTGGTCAAGAACCACACGATGGTTCACGAACAGCTCAAGACCTTTTTCAACGGTTTCCGCCGCGACGCCCACCCGATGGCC…
101	CC1484	FRA	Snowfall	KJ877885		Berge et al., 2014	GTACGCGGCCTGACCGCCACCGGCCGCTTCACATTTGACCCTGGTTTCATGTCCACGGCCTCTTGCGATTCGAAGATCACCTACATCGATGGTGATAATGGCATTCTGCTACACCGCGGCTACCCGATCGAACAACTGGCCGAGCAGTCCGACTATCTCGAAACCTGCTACCTGCTGCTCAACGGTGAACTGCCCACCGCCGAGCAGAAAGCCCAGTTCGTGGCCGTGGTCAAGAACCACACGATGGTTCACGAACAGCTCAAGACCTTTTTCAACGGTTTCCGCCGCGACGCCCACCCGATGGCCGTCATGTGTGGCGTAGTCGGCGCCCTGTCAGCGTTCTACCACGACTCACTGGACATCAATAACCCGCAGCACCGCGAGATTTCTGCGGTCCGC…
101	CC1485	FRA	Snowfall	KJ877886		Berge et al., 2014	GTACGCGGCCTGACCGCCACCGGCCGCTTCACATTTGACCCTGGTTTCATGTCCACGGCCTCTTGCGATTCGAAGATCACCTACATCGATGGTGATAATGGCATTCTGCTACACCGCGGCTACCCGATCGAACAACTGGCCGAGCAGTCCGACTATCTCGAAACCTGCTACCTGCTGCTCAACGGTGAACTGCCCACCGCCGAGCAGAAAGCCCAGTTCGTGGCCGTGGTCAAGAACCACACGATGGTTCACGAACAGCTCAAGACCTTTTTCAACGGTTTCCGCCGCGACGCCCACCCGATGGCCGTCATGTGTGGCGTAGTCGGCGCCCTGTCAGCGTTCTACCACGACTCACTGGACATCAATAACCCGCAGCACCGCGAGATTTCTGCGGTCCGC…
101	CC1488	FRA	Snowfall	KJ877888		Berge et al., 2014	GTACGCGGCCTGACCGCCACCGGCCGCTTCACATTTGACCCTGGTTTCATGTCCACGGCCTCTTGCGATTCGAAGATCACCTACATCGATGGTGATAATGGCATTCTGCTACACCGCGGCTACCCGATCGAACAACTGGCCGAGCAGTCCGACTATCTCGAAACCTGCTACCTGCTGCTCAACGGTGAACTGCCCACCGCCGAGCAGAAAGCCCAGTTCGTGGCCGTGGTCAAGAACCACACGATGGTTCACGAACAGCTCAAGACCTTTTTCAACGGTTTCCGCCGCGACGCCCACCCGATGGCCGTCATGTGTGGCGTAGTCGGCGCCCTGTCAGCGTTCTACCACGACTCACTGGACATCAATAACCCGCAGCACCGCGAGATTTCTGCGGTCCGC…
101	CC1493	FRA	Snowfall	KJ877891		Berge et al., 2014	GTACGCGGCCTGACCGCCACCGGCCGCTTCACATTTGACCCTGGTTTCATGTCCACGGCCTCTTGCGATTCGAAGATCACCTACATCGATGGTGATAATGGCATTCTGCTACACCGCGGCTACCCGATCGAACAACTGGCCGAGCAGTCCGACTATCTCGAAACCTGCTACCTGCTGCTCAACGGTGAACTGCCCACCGCCGAGCAGAAAGCCCAGTTCGTGGCCGTGGTCAAGAACCACACGATGGTTCACGAACAGCTCAAGACCTTTTTCAACGGTTTCCGCCGCGACGCCCACCCGATGGCCGTCATGTGTGGCGTAGTCGGCGCCCTGTCAGCGTTCTACCACGACTCACTGGACATCAATAACCCGCAGCACCGCGAGATTTCTGCGGTCCGC…
101	CC1494	FRA	Snowfall	KJ877892		Berge et al., 2014	GTACGCGGCCTGACCGCCACCGGCCGCTTCACATTTGACCCTGGTTTCATGTCCACGGCCTCTTGCGATTCGAAGATCACCTACATCGATGGTGATAATGGCATTCTGCTACACCGCGGCTACCCGATCGAACAACTGGCCGAGCAGTCCGACTATCTCGAAACCTGCTACCTGCTGCTCAACGGTGAACTGCCCACCGCCGAGCAGAAAGCCCAGTTCGTGGCCGTGGTCAAGAACCACACGATGGTTCACGAACAGCTCAAGACCTTTTTCAACGGTTTCCGCCGCGACGCCCACCCGATGGCCGTCATGTGTGGCGTAGTCGGCGCCCTGTCAGCGTTCTACCACGACTCACTGGACATCAATAACCCGCAGCACCGCGAGATTTCTGCGGTCCGC…
101	CC1543	FRA	Freshwater	AVEJ00000000		Berge et al., 2014	ATGGCTGACAAAAAAGCGCAGTTGATCATCGAGGGCGCTGCCCCCGTCGAGCTGCCAATTCTGACCGGTACAGTGGGTCCGGACGTGATCGACGTACGCGGCCTGACCGCCACCGGCCGCTTCACATTTGACCCTGGTTTCATGTCCACGGCCTCTTGCGATTCGAAGATCACCTACATCGATGGTGATAATGGCATTCTGCTACACCGCGGCTACCCGATCGAACAACTGGCCGAGCAGTCCGACTATCTCGAAACCTGCTACCTGCTGCTCAACGGTGAACTGCCCACCGCCGAGCAGAAAGCCCAGTTCGTGGCCGTGGTCAAGAACCACACGATGGTTCACGAACAGCTCAAGACCTTTTTCAACGGTTTCCGCCGCGACGCCCACCCGATGGCC…
101	CCE0067	FRA	Freshwater	KJ877920		Berge et al., 2014	GCCCCCGTCGAGCTGCCAATTCTGACCGGTACAGTGGGTCCGGACGTGATCGACGTACGCGGCCTGACCGCCACCGGCCGCTTCACATTTGACCCTGGTTTCATGTCCACGGCCTCTTGCGATTCGAAGATCACCTACATCGATGGTGATAATGGCATTCTGCTACACCGCGGCTACCCGATCGAACAACTGGCCGAGCAGTCCGACTATCTCGAAACCTGCTACCTGCTGCTCAACGGTGAACTGCCCACCGCCGAGCAGAAAGCCCAGTTCGTGGCCGTGGTCAAGAACCACACGATGGTTCACGAACAGCTCAAGACCTTTTTCAACGGTTTCCGCCGCGACGCCCACCCGATGGCCGTCATGTGTGGCGTAGTCGGCGCCCTGTCAGCGTTCTAC…
101	CCE0160	FRA	Freshwater	KJ877939		Berge et al., 2014	GCCCCCGTCGAGCTGCCAATTCTGACCGGTACAGTGGGTCCGGACGTGATCGACGTACGCGGCCTGACCGCCACCGGCCGCTTCACATTTGACCCTGGTTTCATGTCCACGGCCTCTTGCGATTCGAAGATCACCTACATCGATGGTGATAATGGCATTCTGCTACACCGCGGCTACCCGATCGAACAACTGGCCGAGCAGTCCGACTATCTCGAAACCTGCTACCTGCTGCTCAACGGTGAACTGCCCACCGCCGAGCAGAAAGCCCAGTTCGTGGCCGTGGTCAAGAACCACACGATGGTTCACGAACAGCTCAAGACCTTTTTCAACGGTTTCCGCCGCGACGCCCACCCGATGGCCGTCATGTGTGGCGTAGTCGGCGCCCTGTCAGCGTTCTAC…
101	CCE0234	FRA	Freshwater	KJ877962		Berge et al., 2014	GCCCCCGTCGAGCTGCCAATTCTGACCGGTACAGTGGGTCCGGACGTGATCGACGTACGCGGCCTGACCGCCACCGGCCGCTTCACATTTGACCCTGGTTTCATGTCCACGGCCTCTTGCGATTCGAAGATCACCTACATCGATGGTGATAATGGCATTCTGCTACACCGCGGCTACCCGATCGAACAACTGGCCGAGCAGTCCGACTATCTCGAAACCTGCTACCTGCTGCTCAACGGTGAACTGCCCACCGCCGAGCAGAAAGCCCAGTTCGTGGCCGTGGTCAAGAACCACACGATGGTTCACGAACAGCTCAAGACCTTTTTCAACGGTTTCCGCCGCGACGCCCACCCGATGGCCGTCATGTGTGGCGTAGTCGGCGCCCTGTCAGCGTTCTAC…
101	CCE0644	FRA	Leaf_litter	KJ877994		Berge et al., 2014	GTACGCGGCCTGACCGCCACCGGCCGCTTCACATTTGACCCTGGTTTCATGTCCACGGCCTCTTGCGATTCGAAGATCACCTACATCGATGGTGATAATGGCATTCTGCTACACCGCGGCTACCCGATCGAACAACTGGCCGAGCAGTCCGACTATCTCGAAACCTGCTACCTGCTGCTCAACGGTGAACTGCCCAACGCCGAGCAGAAAGCCCAGTTCGTGGCCGTGGTCAAGAACCACACGATGGTTCACGAACAGCTCAAGACCTTTTTCAACGGTTTCCGCCGCGACGCCCACCCGATGGCCGTCATGTGTGGCGTAGTCGGCGCCCTGTCAGCGTTCTACCACGACTCACTGGACATCAATAACCCGCAGCACCGCGAGATTTCTGCGGTCCGC…
101	CCE0956	FRA	Leaf_litter	KJ878036		Berge et al., 2014	CGGCCTGACCGCCACCGGCCGCTTCACATTTGACCCTGGTTTCATGTCCACGGCCTCTTGCGATTCGAAGATCACCTACATCGATGGTGATAATGGCATTCTGCTACACCGCGGCTACCCGATCGAACAACTGGCCGAGCAGTCCGACTATCTCGAAACCTGCTACCTGCTGCTCAACGGTGAACTGCCCACCGCCGAGCAGAAAGCCCAGTTCGTGGCCGTGGTCAAGAACCACACGATGGTTCACGAACAGCTCAAGACCTTTTTCAACGGTTTCCGCCGCGACGCCCACCCGATGGCCGTCATGTGTGGCGTAGTCGGCGCCCTGTCAGCGTTCTACCACGACTCACTGGACATCAATAACCCGCAGCACCGCGAGATTTCTGCGGTCCGCCTGGT…
101	CCV0135	FRA	Freshwater	KJ878059		Berge et al., 2014	GCCCCCGTCGAGCTGCCAATTCTGACCGGTACAGTGGGTCCGGACGTGATCGACGTACGCGGCCTGACCGCCACCGGCCGCTTCACATTTGACCCTGGTTTCATGTCCACGGCCTCTTGCGATTCGAAGATCACCTACATCGATGGTGATAATGGCATTCTGCTACACCGCGGCTACCCGATCGAACAACTGGCCGAGCAGTCCGACTATCTCGAAACCTGCTACCTGCTGCTCAACGGTGAACTGCCCACCGCCGAGCAGAAAGCCCAGTTCGTGGCCGTGGTCAAGAACCACACGATGGTTCACGAACAGCTCAAGACCTTTTTCAACGGTTTCCGCCGCGACGCCCACCCGATGGCCGTCATGTGTGGCGTAGTCGGCGCCCTGTCAGCGTTCTAC…
101	CCV0139	FRA	Freshwater	KJ878061		Berge et al., 2014	GCCCCCGTCGAGCTGCCAATTCTGACCGGTACAGTGGGTCCGGACGTGATCGACGTACGCGGCCTGACCGCCACCGGCCGCTTCACATTTGACCCTGGTTTCATGTCCACGGCCTCTTGCGATTCGAAGATCACCTACATCGATGGTGATAATGGCATTCTGCTACACCGCGGCTACCCGATCGAACAACTGGCCGAGCAGTCCGACTATCTCGAAACCTGCTACCTGCTGCTCAACGGTGAACTGCCCACCGCCGAGCAGAAAGCCCAGTTCGTGGCCGTGGTCAAGAACCACACGATGGTTCACGAACAGCTCAAGACCTTTTTCAACGGTTTCCGCCGCGACGCCCACCCGATGGCCGTCATGTGTGGCGTAGTCGGCGCCCTGTCAGCGTTCTAC…
101	CCV0208	FRA	Freshwater	KJ878072		Berge et al., 2014	GCCCCCGTCGAGCTGCCAATTCTGACCGGTACAGTGGGTCCGGACGTGATCGACGTACGCGGCCTGACCGCCACCGGCCGCTTCACATTTGACCCTGGTTTCATGTCCACGGCCTCTTGCGATTCGAAGATCACCTACATCGATGGTGATAATGGCATTCTGCTACACCGCGGCTACCCGATCGAACAACTGGCCGAGCAGTCCGACTATCTCGAAACCTGCTACCTGCTGCTCAACGGTGAACTGCCCACCGCCGAGCAGAAAGCCCAGTTCGTGGCCGTGGTCAAGAACCACACGATGGTTCACGAACAGCTCAAGACCTTTTTCAACGGTTTCCGCCGCGACGCCCACCCGATGGCCGTCATGTGTGGCGTAGTCGGCGCCCTGTCAGCGTTCTAC…
101	CCV0523	FRA	Leaf_litter	KJ878085		Berge et al., 2014	GAGGGCGCTGCCCCCGTCGAGCTGCCAATTCTGACCGGTACAGTGGGTCCGGACGTGATCGACGTACGCGGCCTGACCGCCACCGGCCGCTTCACATTTGACCCTGGTTTCATGTCCACGGCCTCTTGCGATTCGAAGATCACCTACATCGATGGTGATAATGGCATTCTGCTACACCGCGGCTACCCGATCGAACAACTGGCCGAGCAGTCCGACTATCTCGAAACCTGCTACCTGCTGCTCAACGGTGAACTGCCCACCGCCGAGCAGAAAGCCCAGTTCGTGGCCGTGGTCAAGAACCACACGATGGTTCACGAACAGCTCAAGACCTTTTTCAACGGTTTCCGCCGCGACGCCCACCCGATGGCCGTCATGTGTGGCGTAGTCGGCGCCCTGTCA…
101	CCV0553	FRA	Leaf_litter	KJ878086		Berge et al., 2014	CGTACGCGGCCTGACCGCCACCGGCCGCTTCACATTTGACCCTGGTTTCATGTCCACGGCCTCTTGCGATTCGAAGATCACCTACATCGATGGTGATAATGGCATTCTGCTACACCGCGGCTACCCGATCGAACAACTGGCCGAGCAGTCCGACTATCTCGAAACCTGCTACCTGCTGCTCAACGGTGAACTGCCCACCGCCGAGCAGAAAGCCCAGTTCGTGGCCGTGGTCAAGAACCACACGATGGTTCACGAACAGCTCAAGACCTTTTTCAACGGTTTCCGCCGCGACGCCCACCCGATGGCCGTCATGTGTGGCGTAGTCGGCGCCCTGTCAGCGTTCTACCACGACTCACTGGACATCAATAACCCGCAGCACCGCGAGATTTCTGCGGTCCG…
101	CCV0623	FRA	Snowpack	KJ878092		Berge et al., 2014	GAGGGCGCTGCCCCCGTCGAGCTGCCAATTCTGACCGGTACAGTGGGTCCGGACGTGATCGACGTACGCGGCCTGACCGCCACCGGCCGCTTCACATTTGACCCTGGTTTCATGTCCACGGCCTCTTGCGATTCGAAGATCACCTACATCGATGGTGATAATGGCATTCTGCTACACCGCGGCTACCCGATCGAACAACTGGCCGAGCAGTCCGACTATCTCGAAACCTGCTACCTGCTGCTCAACGGTGAACTGCCCACCGCCGAGCAGAAAGCCCAGTTCGTGGCCGTGGTCAAGAACCACACGATGGTTCACGAACAGCTCAAGACCTTTTTCAACGGTTTCCGCCGCGACGCCCACCCGATGGCCGTCATGTGTGGCGTAGTCGGCGCCCTGTCA…
101	CFBP1392	GBR	Plant	HE604370		Berge et al., 2014	ATGGCTGACAAAAAAGCGCAGTTGATCATCGAGGGCGCTGCCCCCGTCGAGCTGCCAATTCTGACCGGTACAGTGGGTCCGGACGTGATCGACGTACGCGGCCTGACCGCCACCGGCCGCTTCACATTTGACCCTGGTTTCATGTCCACGGCCTCTTGCGATTCGAAGATCACCTACATCGATGGTGATAATGGCATTCTGCTACACCGCGGCTACCCGATCGAACAACTGGCCGAGCAGTCCGACTATCTCGAAACCTGCTACCTGCTGCTCAACGGTGAACTGCCCACCGCCGAGCAGAAAGCCCAGTTCGTGGCCGTGGTCAAGAACCACACGATGGTTCACGAACAGCTCAAGACCTTTTTCAACGGTTTCCGCCGCGACGCCCACCCGATGGCC…
101	CFBP1906	FRA	Plant	KJ878107		Berge et al., 2014	CACCGGCCGCTTCACATTTGACCCTGGTTTCATGTCCACGGCCTCTTGCGATTCGAAGATCACCTACATCGATGGTGATAATGGCATTCTGCTACACCGCGGCTACCCGATCGAACAACTGGCCGAGCAGTCCGACTATCTCGAAACCTGCTACCTGCTGCTCAACGGTGAACTGCCCACCGCCGAGCAGAAAGCCCAGTTCGTGGCCGTGGTCAAGAACCACACGATGGTTCACGAACAGCTCAAGACCTTTTTCAACGGTTTCCGCCGCGACGCCCACCCGATGGCCGTCATGTGTGGCGTAGTCGGCGCCCTGTCAGCGTTCTACCACGACTCACTGGACATCAATAACCCGCAGCACCGCGAGATTTCTGCGGTCCGCCTGGTCGCCAAAATGCC…
101	CLA0217	FRA	Snowpack	KJ878123		Berge et al., 2014	GTACGCGGCCTGACCGCCACCGGCCGCTTCACATTTGACCCTGGTTTCATGTCCACGGCCTCTTGCGATTCGAAGATCACCTACATCGATGGTGATAATGGCATTCTGCTACACCGCGGCTACCCGATCGAACAACTGGCCGAGCAGTCCGACTATCTCGAAACCTGCTACCTGCTGCTCAACGGTGAACTGCCCACCGCCGAGCAGAAAGCCCAGTTCGTGGCCGTGGTCAAGAACCACACGATGGTTCACGAACAGCTCAAGACCTTTTTCAACGGTTTCCGCCGCGACGCCCACCCGATGGCCGTCATGTGTGGCGTAGTCGGCGCCCTGTCAGCGTTCTACCACGACTCACTGGACATCAATAACCCGCAGCACCGCGAGATTTCTGCGGTCCGC…
101	CMO0071	FRA	Rain	KJ878151		Berge et al., 2014	GAGGGCGCTGCCCCCGTCGAGCTGCCAATTCTGACCGGTACAGTGGGTCCGGACGTGATCGACGTACGCGGCCTGACCGCCACCGGCCGCTTCACATTTGACCCTGGTTTCATGTCCACGGCCTCTTGCGATTCGAAGATCACCTACATCGATGGTGATAATGGCATCCTGCTACACCGCGGCTACCCGATCGAACAACTGGCCGAGCAGTCCGACTATCTCGAAACCTGCTACCTGCTGCTCAACGGTGAACTGCCCACCGCCGAGCAGAAAGCCCAGTTCGTGGCCGTGGTCAAGAACCACACGATGGTTCACGAACAGCTCAAGACCTTTTTCAACGGTTTCCGCCGCGACGCCCACCCGATGGCCGTCATGTGTGGCGTAGTCGGCGCCCTGTCA…
101	CMO0078	FRA	Rain	KJ878153		Berge et al., 2014	AGGGCGCAGCCCCCGTCGAGCTGCCAATTCTGACCGGTACAGTGGGTCCGGACGTGATCGACGTACGCGGCCTGACCGCCACCGGCCGCTTCACATTTGACCCTGGTTTCATGTCCACGGCCTCTTGCGATTCGAAGATCACCTACATCGATGGTGATAATGGCATTCTGCTACACCGCGGCTACCCGATCGAACAACTGGCCGAGCAGTCCGACTATCTCGAAACCTGCTACCTGCTGCTCAACGGTGAACTGCCCACCGCCGAGCAGAAAGCCCAGTTCGTGGCCGTGGTCAAGAACCACACGATGGTTCACGAACAGCTCAAGACCTTTTTCAACGGTTTCCGCCGCGACGCCCACCCGATGGCCGTCATGTGTGGCGTAGTCGGCGCCCTGTCAG…
101	CMW0002	FRA	Freshwater	KJ878158		Berge et al., 2014	GGGCGCTGCCCCCGTCGAGCTGCCAATTCTGACCGGTACAGTGGGTCCGGACGTGATCGACGTACGCGGCCTGACCGCCACCGGCCGCTTCACATTTGACCCTGGTTTCATGTCCACGGCCTCTTGCGATTCGAAGATCACCTACATCGATGGTGATAATGGCATTCTACTACACCGCGGCTACCCGATCGAACAACTGGCCGAGCAGTCCGACTATCTCGAAACCTGCTACCTGCTGCTCAACGGTGAACTGCCCACCGCCGAGCAGAAAGCCCAGTTCGTGGCCGTGGTCAAGAACCACACGATGGTTCACGAACAGCTCAAGACCTTTTTCAACGGTTTCCGCCGCGACGCCCACCCGATGGCCGTCATGTGTGGCGTAGTCGGCGCCCTGTCAGC…
101	CST0007	FRA	Rain	KJ878182		Berge et al., 2014	AGGGCGCTGCCCCCGTCGAGCTGCCAATTCTGACCGGTACAGTGGGTCCGGACGTGATCGACGTACGCGGCCTGACCGCCACCGGCCGCTTCACATTTGACCCTGGTTTCATGTCCACGGCCTCTTGCGATTCGAAGATCACCTACATCGATGGTGATAATGGCATTCTGCTACACCGCGGCTACCCGATCGAACAACTGGCCGAGCAGTCCGACTATCTCGAAACCTGCTACCTGCTGCTCAACGGTGAACTGCCCACCGCCGAGCAGAAAGCCCAGTTCGTGGCCGTGGTCAAGAACCACACGATGGTTCACGAACAGCTCAAGACCTTTTTCAACGGTTTCCGCCGCGACGCCCACCCGATGGCCGTCATGTGTTGCGTAGTCGGCGCCCTGTCAG…
101	CSZ0133	FRA	Snowpack	KJ878201		Berge et al., 2014	TCGGACTGCTCGGCCAGTTGTTCGATCGGGTAGCCGCGGTGTAGCAGAATGCCATTATCACCATCGATGCAGTTGATCCACGAGGGCGCTGCCCCCGTCGAGCTGCCAATTCTGACCGGTACAGTGGGTCCGGACGTGATCGACGTACGCGGCCTGACCGCCACCGGCCGCTTCACATTTGACCCTGGTTTCATGTCCACGGCCTCTTGCGATTCGAAGATCACCTACATCGATGGTGATAATGGCATTCTGCTACACCGCGGCTACCCGATCGAACAACTGGCCGAGCAGTCCGACTATCTCGAAACCTGCTACCTGCTGCTCAACGGTGAACTGCCCACCGCCGAGCAGAAAGCCCAGTTCGTGGCCGTGGTCAAGAACCACACGATGGTTCACGAA…
101	CSZ0185	FRA	Freshwater	KJ878210		Berge et al., 2014	GCCCCCGTCGAGCTGCCAATTCTGACCGGTACAGTGGGTCCGGACGTGATCGACGTACGCGGCCTGACCGCCACCGGCCGCTTCACATTTGACCCTGGTTTCATGTCCACGGCCTCTTGCGATTCGAAGATCACCTACATCGATGGTGATAATGGCATTCTGCTACACCGCGGCTACCCGATCGAACAACTGGCCGAGCAGTCCGACTATCTCGAAACCTGCTACCTGCTGCTCAACGGTGAACTGCCCACCGCCGAGCAGAAAGCCCAGTTCGTGGCCGTGGTCAAGAACCACACGATGGTTCACGAACAGCTCAAGACCTTTTTCAACGGTTTCCGCCGCGACGCCCACCCGATGGCCGTCATGTGTGGCGTAGTCGGCGCCCTGTCAGCGTTCTAC…
101	CSZ0188	FRA	Freshwater	KJ878211		Berge et al., 2014	GCCCCCGTCGAGCTGCCAATTCTGACCGGTACAGTGGGTCCGGACGTGATCGACGTACGCGGCCTGACCGCCACCGGCCGCTTCACATTTGACCCTGGTTTCATGTCCACGGCCTCTTGCGATTCGAAGATCACCTACATCGATGGTGATAATGGCATTCTGCTACACCGCGGCTACCCGATCGAACAACTGGCCGAGCAGTCCGACTATCTCGAAACCTGCTACCTGCTGCTCAACGGTGAACTGCCCACCGCCGAGCAGAAAGCCCAGTTCGTGGCCGTGGTCAAGAACCACACGATGGTTCACGAACAGCTCAAGACCTTTTTCAACGGTTTCCGCCGCGACGCCCACCCGATGGCCGTCATGTGTGGCGTAGTCGGCGCCCTGTCAGCGTTCTAC…
101	CSZ0215	FRA	Freshwater	KJ878212		Berge et al., 2014	GCCCCCGTCGAGCTGCCAATTCTGACCGGTACAGTGGGTCCGGACGTGATCGACGTACGCGGCCTGACCGCCACCGGCCGCTTCACATTTGACCCTGGTTTCATGTCCACGGCCTCTTGCGATTCGAAGATCACCTACATCGATGGTGATAATGGCATTCTGCTACACCGCGGCTACCCGATCGAACAACTGGCCGAGCAGTCCGACTATCTCGAAACCTGCTACCTGCTGCTCAACGGTGAACTGCCCACCGCCGAGCAGAAAGCCCAGTTCGTGGCCGTGGTCAAGAACCACACGATGGTTCACGAACAGCTCAAGACCTTTTTCAACGGTTTCCGCCGCGACGCCCACCCGATGGCCGTCATGTGTGGCGTAGTCGGCGCCCTGTCAGCGTTCTAC…
101	CSZ0250	FRA	Freshwater	KJ878217		Berge et al., 2014	GCCCCCGTCGAGCTGCCAATTCTGACCGGTACAGTGGGTCCGGACGTGATCGACGTACGCGGCCTGACCGCCACCGGCCGCTTCACATTTGACCCTGGTTTCATGTCCACGGCCTCTTGCGATTCGAAGATCACCTACATCGATGGTGATAATGGCATTCTGCTACACCGCGGCTACCCGATCGAACAACTGGCCGAGCAGTCCGACTATCTCGAAACCTGCTACCTGCTGCTCAACGGTGAACTGCCCACCGCCGAGCAGAAAGCCCAGTTCGTGGCCGTGGTCAAGAACCACACGATGGTTCACGAACAGCTCAAGACCTTTTTCAACGGTTTCCGCCGCGACGCCCACCCGATGGCCGTCATGTGTGGCGTAGTCGGCGCCCTGTCAGCGTTCTAC…
101	CSZ0381	FRA	Freshwater	KJ878261		Berge et al., 2014	GCCCCCGTCGAGCTGCCAATTCTGACCGGTACAGTGGGTCCGGACGTGATCGACGTACGCGGCCTGACCGCCACCGGCCGCTTCACATTTGACCCTGGTTTCATGTCCACGGCCTCTTGCGATTCGAAGATCACCTACATCGATGGTGATAATGGCATTCTGCTACACCGCGGCTACCCGATCGAACAACTGGCCGAGCAGTCCGACTATCTCGAAACCTGCTACCTGCTGCTCAACGGTGAACTGCCCACCGCCGAGCAGAAAGCCCAGTTCGTGGCCGTGGTCAAGAACCACACGATGGTTCACGAACAGCTCAAGACCTTTTTCAACGGTTTCCGCCGCGACGCCCACCCGATGGCCGTCATGTGTGGCGTAGTCGGCGCCCTGTCAGCGTTCTAC…
101	CSZ0719	FRA	Snowpack	KJ878274		Berge et al., 2014	GAGGGCGCTGCCCCCGTCGAGCTGCCAATTCTGACCGGTACAGTGGGTCCGGACGTGATCGACGTACGCGGCCTGACCGCCACCGGCCGCTTCACATTTGACCCTGGTTTCATGTCCACGGCCTCTTGCGATTCGAAGATCACCTACATCGATGGTGATAATGGCATTCTGCTACACCGCGGCTACCCGATCGAACAACTGGCCGAGCAGTCCGACTATCTCGAAACCTGCTACCTGCTGCTCAACGGTGAACTGCCCACCGCCGAGCAGAAAGCCCAGTTCGTGGCCGTGGTCAAGAACCACACGATGGTTCACGAACAGCTCAAGACCTTTTTCAACGGTTTCCGCCGCGACGCCCACCCGATGGCCGTCATGTGTGGCGTAGTCGGCGCCCTGTCA…
101	CVB0031	FRA	Biofilm	KJ878303		Berge et al., 2014	GAGGGCGCTGCCCCCGTCGAGCTGCCAATTCTGACCGGTACAGTGGGTCCGGACGTGATCGACGTACGCGGCCTGACCGCCACCGGCCGCTTCACATTTGACCCTGGTTTCATGTCCACGGCCTCTTGCGATTCGAAGATCACCTACATCGATGGTGATAATGGCATTCTGCTACACCGCGGCTACCCGATCGAACAACTGGCCGAGCAGTCCGACTATCTCGAAACCTGCTACCTGCTGCTCAACGGTGAACTGCCCACCGCCGAGCAGAAAGCCCAGTTCGTGGCCGTGGTCAAGAACCACACGATGGTTCACGAACAGCTCAAGACCTTTTTCAACGGTTTCCGCCGCGACGCCCACCCGATGGCCGTCATGTGTGGCGTAGTCGGCGCCCTGTCA…
101	CVB0066	FRA	Biofilm	KJ878312		Berge et al., 2014	GAGGGCGCTGCCCCCGTCGAGCTGCCAATTCTGACCGGTACAGTGGGTCCGGACGTGATCGACGTACGCGGCCTGACCGCCACCGGCCGCTTCACATTTGACCCTGGTTTCATGTCCACGGCCTCTTGCGATTCGAAGATCACCTACATCGATGGTGATAATGGCATTCTGCTACACCGCGGCTACCCGATCGAACAACTGGCCGAGCAGTCCGACTATCTCGAAACCTGCTACCTGCTGCTCAACGGTGAACTGCCCACCGCCGAGCAGAAAGCCCAGTTCGTGGCCGTGGTCAAGAACCACACGATGGTTCACGAACAGCTCAAGACCTTTTTCAACGGTTTCCGCCGCGACGCCCACCCGATGGCCGTCATGTGTGGCGTAGTCGGCGCCCTGTCA…
101	GAB0016	FRA	Biofilm	KJ878324		Berge et al., 2014	GAGGGCGCTGCCCCCGTCGAGCTGCCAATTCTGACCGGTACAGTGGGTCCGGACGTGATCGACGTACGCGGCCTGACCGCCACCGGCCGCTTCACATTTGACCCTGGTTTCATGTCCACGGCCTCTTGCGATTCGAAGATCACCTACATCGATGGTGATAATGGCATTCTGCTACACCGCGGCTACCCGATCGAACAACTGGCCGAGCAGTCCGACTATCTCGAAACCTGCTACCTGCTGCTCAACGGTGAACTGCCCACCGCCGAGCAGAAAGCCCAGTTCGTGGCCGTGGTCAAGAACCACACGATGGTTCACGAACAGCTCAAGACCTTTTTCAACGGTTTCCGCCGCGACGCCCACCCGATGGCCGTCATGTGTGGCGTAGTCGGCGCCCTGTCA…
101	GAB0024	FRA	Biofilm	KJ878328		Berge et al., 2014	GGGCGCTGCCCCCGTCGAGCTGCCAATTCTGACCGGTACAGTGGGTCCGGACGTGATCGACGTACGCGGCCTGACCGCCACCGGCCGCTTCACATTTGACCCTGGTTTCATGTCCACGGCCTCTTGCGATTCGAGGATCACCTACATCGATGGTGATAATGGCATTCTGCTACACCGCGGCTACCCGATCGAACAACTGGCCGAGCAGTCCGACTATCTCGAAACCTGCTACCTGCTGCTCAACGGTGAACTGCCCACCGCCGAGCAGAAAGCCCAGTTCGTGGCCGTGGTCAAGAACCACACGATGGTTCACGAACAGCTCAAGACCTTTTTCAACGGTTTCCGCCGCGACGCCCACCCGATGGCCGTCATGTGTGGCGTAGTCGGCGCCCTGTCAGC…
101	JT7	ITA	Plant	KJ878371		Berge et al., 2014	GCCCCCGTCGAGCTGCCAATTCTGACCGGTACAGTGGGTCCGGACGTGATCGACGTACGCGGCCTGACCGCCACCGGCCGCTTCACATTTGACCCTGGTTTCATGTCCACGGCCTCTTGCGATTCGAAGATCACCTACATCGATGGTGATAATGGCATTCTGCTACACCGCGGCTACCCGATCGAACAACTGGCCGAGCAGTCCGACTATCTCGAAACCTGCTACCTGCTGCTCAACGGTGAACTGCCCACCGCCGAGCAGAAAGCCCAGTTCGTGGCCGTGGTCAAGAACCACACGATGGTTCACGAACAGCTCAAGACCTTTTTCAACGGTTTCCGCCGCGACGCCCACCCGATGGCCGTCATGTGTGGCGTAGTCGGCGCCCTGTCAGCGTTCTAC…
101	LAB0003	FRA	Biofilm	KJ878374		Berge et al., 2014	GAGGGCGCTGCCCCCGTCGAGCTGCCAATTCTGACCGGTACAGTGGGTCCGGACGTGATCGACGTACGCGGCCTGACCGCCACCGGCCGCTTCACATTTGACCCTGGTTTCATGTCCACGGCCTCTTGCGATTCGAAGATCACCTACATCGATGGTGATAATGGCATTCTGCTACACCGCGGCTACCCGATCGAACAACTGGCCGAGCAGTCCGACTATCTCGAAACCTGCTACCTGCTGCTCAACGGTGAACTGCCCACCGCCGAGCAGAAAGCCCAGTTCGTGGCCGTGGTCAAGAACCACACGATGGTTCACGAACAGCTCAAGACCTTTTTCAACGGTTTCCGCCGCGACGCCCACCCGATGGCCGTCATGTGTGGCGTAGTCGGCGCCCTGTCA…
101	LAB0092	FRA	Biofilm	KJ878390		Berge et al., 2014	GGGCGCTGCCCCCGTCGAGCTGCCAATTCTGACCGGTACAGTGGGTCCGGACGTGATCGACGTACGCGGCCTGACCGCCACCGGCCGCTTCACATTTGACCCTGGTTTCATGTCCACGGCCTCTTGCGATTCGAAGATCACATACATCGATGGTGATAATGGCATTCTGCTACACCGCGGCTACCCGATCGAACAACTGGCCGAGCAGTCCGACTATCTCGAAACCTGCTACCTGCTGCTCAACGGTGAACTGCCCACCGCCGAGCAGAAAGCCCAGTTCGTGGCCGTGGTCAAGAACCACACGATGGTTCACGAACAGCTCAAGACCTTTTTCAACGGTTTCCGCCGCGACGCCCACCCGATGGCCGTCATGTGTGGCGTAGTCGGCGCCCTGTCAGC…
101	LNW0001	FRA	Irrigation_water	KJ878401		Berge et al., 2014	GGCGCTGCCCCCGTCGAGCTGCCAATTCTGACCGGTACAGTGGGTCCGGACGTGATCGACGTACGCGGCCTGACCGCCACCGGCCGCTTCACATTTGACCCTGGTTTCATGTCCACGGCCTCTTGCGATTCGAAGATCACCTACATCGATGGTGATAATGGCATTCTGCTACACCGCGGCTACCCGATCGAACAACTGGCCGAGCAGTCCGACTATCTCGAAACCTGCTACCTGCTGCTCAACGGTGAACTGCCCACCGCCGAGCAGAAAGCCCAGTTCGTGGCCGTGGTCAAGAACCACACGATGGTTCACGAACAGCTCAAGACCTTTTTCAACGGTTTCCGCCGCGACGCCCACCCGATGGCCGTCATGTGTGGCGTAGTCGGCGCCCTGTCAGCG…
101	P6	PRT	Plant	KJ878421		Berge et al., 2014	TACGCGGCCTGACCGCCACCGGCCGCTTCACATTTGACCCTGGTTTCATGTCCACGGCCTCTTGCGATTCGAAGATCACCTACATCGATGGTGATAATGGCATTCTGCTACACCGCGGCTACCCGATCGAACAACTGGCCGAGCAGTCCGACTATCTCGAAACCTGCTACCTGCTGCTCAACGGTGAACTGCCCACCGCCGAGCAGAAAGCCCAGTTCGTGGCCGTGGTCAAGAACCACACGATGGTTCACGAACAGCTCAAGACCTTTTTCAACGGTTTCCGCCGCGACGCCCACCCGATGGCCGTCATGTGTGGCGTAGTCGGCGCCCTGTCAGCGTTCTACCACGACTCACTGGACATCAATAACCCGCAGCACCGCGAGATTTCTGCGGTCCGCC…
101	SZ0006	FRA	Freshwater	KJ878433		Berge et al., 2014	GATCGACGTACGCGGCCTGACCGCCACCGGCCGCTTCACATTTGACCCTGGTTTCATGTCCACGGCCTCTTGCGATTCGAAGATCACCTACATCGATGGTGATAACGGCATTCTGCTACACCGCGGCTACCCGATCGAACAACTGGCCGAGCAGTCCGACTATCTCGAAACCTGCTACCTGCTGCTCAACGGTGAACTGCCCACCGCCGAGCAGAAAGCCCAGTTCGTGGCCGTGGTCAAGAACCACACGATGGTTCACGAACAGCTCAAGACCTTTTTCAACGGTTTCCGCCGCGACGCCCACCCGATGGCCGTCATGTGTGGCGTAGTCGGCGCCCTGTCAGCGTTCTACCACGACTCACTGGACATCAATAACCCGCAGCACCGCGAGATTTCTGC…
101	SZ0007	FRA	Freshwater	KJ878434		Berge et al., 2014	CGACGTACGCGGCCTGACCGCCACCGGCCGCTTCACATTTGACCCTGGTTTCATGTCCACGGCCTCTTGCGATTCGAAGATCACCTACATCGATGGTGATAATGGCATTCTGCTACACCGCGGCTACCCGATCGAACAACTGGCCGAGCAGTCCGACTATCTCGAAACCTGCTACCTGCTGCTCAACGGTGAACTGCCCACCGCCGAGCAGAAAGCCCAGTTCGTGGCCGTGGTCAAGAACCACACGATGGTTCACGAACAGCTCAAGACCTTTTTCAACGGTTTCCGCCGCGACGCCCACCCGATGGCCGTCATGTGTGGCGTAGTCGGCGCCCTGTCAGCGTTCTACCACGACTCACTGGACATCAATAACCCGCAGCACCGCGAGATTTCTGCGGT…
101	SZ0089	FRA	Freshwater	KJ878446		Berge et al., 2014	GATCGACGTACGCGGCCTGACCGCCACCGGCCGCTTCACATTTGACCCTGGTTTCATGTCCACGGCCTCTTGCGATTCGAAGATCACCTACATCGATGGTGATAATGGCATTCTGCTACACCGCGGCTACCCGATCGAACAACTGGCCGAGCAGTCCGACTATCTCGAAACCTGCTACCTGCTGCTCAACGGTGAACTGCCCACCGCCGAGCAGAAAGCCCAGTTCGTGGCCGTGGTCAAGAACCACACGATGGTTCACGAACAGCTCAAGACCTTTTTCAACGGTTTCCGCCGCGACGCCCACCCGATGGCCGTCATGTGTGGCGTAGTCGGCGCCCTGTCAGCGTTCTACCACGACTCACTGGACATCAATAACCCGCAGCACCGCGAGATTTCTGC…
101	SZ0116	FRA	Freshwater	KJ878451		Berge et al., 2014	GTGATCGACGTACGCGGCCTGACCGCCACCGGCCGCTTCACATTTGACCCTGGTTTCATGTCCACGGCCTCTTGCGATTCGAAGATCACCTACATCGATGGTGATAATGGCATTCTGCTACACCGCGGCTACCCGATCGAACAACTGGCCGAGCAGTCCGACTATCTCGAAACCTGCTACCTGCTGCTCAACGGTGAACTGCCCACCGCCGAGCAGAAAGCCCAGTTCGTGGCCGTGGTCAAGAACCACACGATGGTTCACGAACAGCTCAAGACCTTTTTCAACGGTTTCCGCCGCGACGCCCACCCGATGGCCGTCATGTGTGGCGTAGTCGGCGCCCTGTCAGCGTTCTACCACGACTCACTGGACATCAATAACCCGCAGCACCGCGAGATTTCT…
101	SZB0005	FRA	Biofilm	KJ878464		Berge et al., 2014	AGGGCGCTGCCCCCGTCGAGCTGCCAATTCTGACCGGTACAGTGGGTCCGGACGTGATCGACGTACGCGGCCTGACCGCCACCGGCCGCTTCACATTTGACCCTGGTTTCATGTCCACGGCCTCTTGCGATTCGAAGATCACCTACATCGATGGTGATAATGGCATTCTGCTACACCGCGGCTACCCGATCGAACAACTGGCCGAGCAGTCCGACTATCTCGAAACCTGCTACCTGCTGCTCAACGGTGAACTGCCCACCGCCGAGCAGAAAGCCCAGTTCGTGGCCGTGGTCAAGAACCACACGATGGTTCACGAACAGCTCAAGACCTTTTTCAACGGTTTCCGCCGCGACGCCCACCCGATGGCCGTCATGTGTGGCGTAGTCGGCGCCCTGTCAG…
101	SZB0017	FRA	Biofilm	KJ878470		Berge et al., 2014	AGAGCGCTGCCCCCGTCGAGCTGCCAATTCTGACCGGTACAGTGGGTCCGGACGTGATCGACGTACGCGGCCTGACCGCCACCGGCCGCTTCACATTTGACCCTGGTTTCATGTCCACGGCCTCTTGCGATTCGAAGATCACCTACATCGATGGTGATAATGGCATTCTGCTACACCGCGGCTACCCGATCGAACAACTGGCCGAGCAGTCCGACTATCTCGAAACCTGCTACCTGCTGCTCAACGGTGAACTGCCCACCGCCGAGCAGAAAGCCCAGTTCGTGGCCGTGGTCAAGAACCACACGATGGTTCACGAACAGCTCAAGACCTTTTTCAACGGTTTCCGCCGCGACGCCCACCCGATGGCCGTCATGTGTGGCGTAGTCGGCGCCCTGTCAG…
101	UB0305	FRA	Freshwater	KJ878514		Berge et al., 2014	GCCCCCGTCGAGCTGCCAATTCTGACCGGTACAGTGGGTCCGGACGTGATCGACGTACGCGGCCTGACCGCCACCGGCCGCTTCACATTTGACCCTGGTTTCATGTCCACGGCCTCTTGCGATTCGAAGATCACCTACATCGATGGTGATAATGGCATTCTGCTACACCGCGGCTACCCGATCGAACAACTGGCCGAGCAGTCCGACTATCTCGAAACCTGCTACCTGCTGCTCAACGGTGAACTGCCCACCGCCGAGCAGAAAGCCCAGTTCGTGGCCGTGGTCAAGAACCACACGATGGTTCACGAACAGCTCAAGACCTTTTTCAACGGTTTCCGCCGCGACGCCCACCCGATGGCCGTCATGTGTGGCGTAGTCGGCGCCCTGTCAGCGTTCTAC…
101	UB0429	FRA	Freshwater	KJ878525		Berge et al., 2014	GTGATCGACGTACGCGGCCTGACCGCCACCGGCCGCTTCACATTTGACCCTGGTTTCATGTCCACGGCCTCTTGCGATTCGAAGATCACCTACATCGATGGTGATAATGGCATTCTGCTACACCGCGGCTACCCGATCGAACAACTGGCCGAGCAGTCCGACTATCTCGAAACCTGCTACCTGCTGCTCAACGGTGAACTGCCCACCGCCGAGCAGAAAGCCCAGTTCGTGGCCGTGGTCAAGAACCACACGATGGTTCACGAACAGCTCAAGACCTTTTTCAACGGTTTCCGCCGCGACGCCCACCCGATGGCCGTCATGTGTGGCGTAGTCGGCGCCCTGTCAGCGTTCTACCACGACTCACTGGACATCAATAACCCGCAGCACCGCGAGATTTCT…
101	USA0088	USA	Freshwater	KJ878541		Berge et al., 2014	GTGATCGACGTACGCGGCCTGACCGCCACCGGCCGCTTCACATTTGACCCTGGTTTCATGTCCACGGCCTCTTGCGATTCGAAGATCACCTACATCGATGGTGATAATGGCATTCTGCTACACCGCGGCTACCCGATCGAACAACTGGCCGAGCAGTCCGACTATCTCGAAACCTGCTACCTGCTGCTCAACGGTGAACTGCCCACCGCCGAGCAGAAAGCCCAGTTCGTGGCCGTGGTCAAGAACCACACGATGGTTCACGAACAGCTCAAGACCTTTTTCAACGGTTTCCGCCGCGACGCCCACCCGATGGCCGTCATGTGTGGCGTAGTCGGCGCCCTGTCAGCGTTCTACCACGACTCACTGGACATCAATAACCCGCAGCACCGCGAGATTTCT…
101	JFJ-0007	CHE	Snowfall	KY379248		Stopelli et al, 2017	CACCGGCCGCTTCACATTTGACCCTGGTTTCATGTCCACGGCCTCTTGCGATTCGAAGATCACCTACATCGATGGTGATAATGGCATTCTGCTACACCGCGGCTACCCGATCGAACAACTGGCCGAGCAGTCCGACTACCTCGAAACCTGCTACCTGCTGCTCAACGGTGAACTACCCACCGCCGAGCAGAAAGCCCAGTTCGTGGCCGTGGTCAAGAACCACACGATGGTTCACGAACAGCTCAAGACCTTTTTCAACGGTTTCCGCCGCGACGCCCACCCGATGGCCGTCATGTGTGGCGTAGTCGGCGCCCTGTCAGCGTTCTACCACGACTCGCTGGACATCAATAACCCGCAGCACCGCGAGATTTCCGCGGTACGCCTGATCGCCAAGATGCC…
101	JFJ-0043	CHE	Snowfall	KY379253		Stopelli et al, 2017	ATTCTGACCGGTACAGTGGGTCCGGACGTGATCGACGTACGCGGCCTGACCGCCACCGGCCGCTTCACATTTGACCCTGGTTTCATGTCCACGGCCTCTTGCGATTCGAAGATCACCTACATCGATGGTGATAATGGCATTCTGCTACACCGCGGCTACCCGATCGAACAACTGGCCGAGCAGTCCGACTACCTCGAAACCTGCTACCTGCTGCTCAACGGTGAACTGCCCACCGCCGAGCAGAAAGCCCAGTTCGTGGCCGTGGTCAAGAACCACACGATGGTTCACGAACAGCTCAAGACCTTTTTCAACGGTTTCCGCCGCGACGCCCACCCGATGGCCGTCATGTGTGGCGTAGTCGGCGCCCTGTCAGCGTTCTACCACGACTCGCTGGACATC…
102	CST0089	FRA	Rain	KJ878193		Berge et al., 2014	GAGGGCGCTGCCCCCGTCGAGCTGCCAATTCTGACCGGTACAGTGGGTCCGGACGTGATCGACGTACGCGGCCTGACCGCCACCGGCCGCTTCACATTTGACCCTGGTTTCATGTCCACGGCCTCTTGCGATTCGAAGATCACCTACATCGATGGTGATAATGGCATTCTGCTACACCGCGGCTACCCGATCGAACAACTGGCCGAGCAGTCCGACTATCTCGAAACCTGCTACCTGCTGCTCAACGGTGAACTGCCCACCGCCGAGCAGAAAGCCCAGTTCGTGGCCGTGGTCAAGAACCACACGATGGTTCACGAACAGCTCAAGACCTTTTTCAACGGTTTCCGCCGCGACGCCCACCCGATGGCCGTCATGTGCGGCGTAGTCGGCGCCCTGTCA…
102	LNW0034	FRA	Irrigation_water	KJ878412		Berge et al., 2014	GGGCGCTGCCCCCGTCGAGCTGCCAATTCTGACCGGTACAGTGGGTCCGGACGTGATCGACGTACGCGGCCTGACCGCCACCGGCCGCTTCACATTTGACCCTGGTTTCATGTCCACGGCCTCTTGCGATTCGAAGATCACCTACATCGATGGTGATAATGGCATTCTGCTACACCGCGGCTACCCGATCGAACAACTGGCCGAGCAGTCCGACTATCTCGAAACCTGCTACCTGCTGCTCAACGGTGAACTGCCCACCGCCGAGCAGAAAGCCCAGTTCGTGGCCGTGGTCAAGAACCACACGATGGTTCACGAACAGCTCAAGACCTTTTTCAACGGTTTCCGCCGCGACGCCCACCCGATGGCCGTCATGTGCGGCGTAGTCGGCGCCCTGTCAGC…
102	SZ0002	FRA	Freshwater	KJ878431		Berge et al., 2014	CGACGTACGCGGCCTGACCGCCACCGGCCGCTTCACATTTGACCCTGGTTTCATGTCCACGGCCTCTTGCGATTCGAAGATCACCTACATCGATGGTGATAATGGCATTCTGCTACACCGCGGCTACCCGATCGAACAACTGGCCGAGCAGTCCGACTATCTCGAAACCTGCTACCTGCTGCTCAACGGTGAACTGCCCACCGCCGAGCAGAAAGCCCAGTTCGTGGCCGTGGTCAAGAACCACACGATGGTTCACGAACAGCTCAAGACCTTTTTCAACGGTTTCCGCCGCGACGCCCACCCGATGGCCGTCATGTGCGGCGTAGTCGGCGCCCTGTCAGCGTTCTACCACGACTCACTGGACATCAATAACCCGCAGCACCGCGAGATTTCTGCGGT…
102	SZ0005	FRA	Freshwater	KJ878432		Berge et al., 2014	CGACGTACGCGGCCTGACCGCCACCGGCCGCTTCACATTTGACCCTGGTTTCATGTCCACGGCCTCTTGCGATTCGAAGATCACCTACATCGATGGTGATAATGGCATTCTGCTACACCGCGGCTACCCGATCGAACAACTGGCCGAGCAGTCCGACTATCTCGAAACCTGCTACCTGCTGCTCAACGGTGAACTGCCCACCGCCGAGCAGAAAGCCCAGTTCGTGGCCGTGGTCAAGAACCACACGATGGTTCACGAACAGCTCAAGACCTTTTTCAACGGTTTCCGCCGCGACGCCCACCCGATGGCCGTCATGTGCGGCGTAGTCGGCGCCCTGTCAGCGTTCTACCACGACTCACTGGACATCAATAACCCGCAGCACCGCGAGATTTCTGCGGT…
102	SZ0043	FRA	Freshwater	KJ878440		Berge et al., 2014	GATCGACGTACGCGGCCTGACCGCCACCGGCCGCTTCACATTTGACCCTGGTTTCATGTCCACGGCCTCTTGCGATTCGAAGATCACCTACATCGATGGTGATAATGGCATTCTGCTACACCGCGGCTACCCGATCGAACAACTGGCCGAGCAGTCCGACTATCTCGAAACCTGCTACCTGCTGCTCAACGGTGAACTGCCCACCGCCGAGCAGAAAGCCCAGTTCGTGGCCGTGGTCAAGAACCACACGATGGTTCACGAACAGCTCAAGACCTTTTTCAACGGTTTCCGCCGCGACGCCCACCCGATGGCCGTCATGTGCGGCGTAGTCGGCGCCCTGTCAGCGTTCTACCACGACTCACTGGACATCAATAACCCGCAGCACCGCGAGATTTCTGC…
102	SZ0048	FRA	Freshwater	KJ878442		Berge et al., 2014	GATCGACGTACGCGGCCTGACCGCCACCGGCCGCTTCACATTTGACCCTGGTTTCATGTCCACGGCCTCTTGCGATTCGAAGATCACCTACATCGATGGTGATAATGGCATTCTGCTACACCGCGGCTACCCGATCGAACAACTGGCCGAGCAGTCCGACTATCTCGAAACCTGCTACCTGCTGCTCAACGGTGAACTGCCCACCGCCGAGCAGAAAGCCCAGTTCGTGGCCGTGGTCAAGAACCACACGATGGTTCACGAACAGCTCAAGACCTTTTTCAACGGTTTCCGCCGCGACGCCCACCCGATGGCCGTCATGTGCGGCGTAGTCGGCGCCCTGTCAGCGTTCTACCACGACTCACTGGACATCAATAACCCGCAGCACCGCGAGATTTCTGC…
102	SZ0085	FRA	Freshwater	KJ878445		Berge et al., 2014	GATCGACGTACGCGGCCTGACCGCCACCGGCCGCTTCACATTTGACCCTGGTTTCATGTCCACGGCCTCTTGCGATTCGAAGATCACCTACATCGATGGTGATAATGGCATTCTGCTACACCGCGGCTACCCGATCGAACAACTGGCCGAGCAGTCCGACTATCTCGAAACCTGCTACCTGCTGCTCAACGGTGAACTGCCCACCGCCGAGCAGAAAGCCCAGTTCGTGGCCGTGGTCAAGAACCACACGATGGTTCACGAACAGCTCAAGACCTTTTTCAACGGTTTCCGCCGCGACGCCCACCCGATGGCCGTCATGTGCGGCGTAGTCGGCGCCCTGTCAGCGTTCTACCACGACTCACTGGACATCAATAACCCGCAGCACCGCGAGATTTCTGC…
102	SZ0092	FRA	Freshwater	KJ878447		Berge et al., 2014	TGATCGACGTACGCGGCCTGACCGCCACCGGCCGCTTCACATTTGACCCTGGTTTCATGTCCACGGCCTCTTGCGATTCGAAGATCACCTACATCGATGGTGATAATGGCATTCTGCTACACCGCGGCTACCCGATCGAACAACTGGCCGAGCAGTCCGACTATCTCGAAACCTGCTACCTGCTGCTCAACGGTGAACTGCCCACCGCCGAGCAGAAAGCCCAGTTCGTGGCCGTGGTCAAGAACCACACGATGGTTCACGAACAGCTCAAGACCTTTTTCAACGGTTTCCGCCGCGACGCCCACCCGATGGCCGTCATGTGCGGCGTAGTCGGCGCCCTGTCAGCGTTCTACCACGACTCACTGGACATCAATAACCCGCAGCACCGCGAGATTTCTG…
102	SZ0109	FRA	Freshwater	KJ878449		Berge et al., 2014	TGATCGACGTACGCGGCCTGACCGCCACCGGCCGCTTCACATTTGACCCTGGTTTCATGTCCACGGCCTCTTGCGATTCGAAGATCACCTACATCGATGGTGATAATGGCATTCTGCTACACCGCGGCTACCCGATCGAACAACTGGCCGAGCAGTCCGACTATCTCGAAACCTGCTACCTGCTGCTCAACGGTGAACTGCCCACCGCCGAGCAGAAAGCCCAGTTCGTGGCCGTGGTCAAGAACCACACGATGGTTCACGAACAGCTCAAGACCTTTTTCAACGGTTTCCGCCGCGACGCCCACCCGATGGCCGTCATGTGCGGCGTAGTCGGCGCCCTGTCAGCGTTCTACCACGACTCACTGGACATCAATAACCCGCAGCACCGCGAGATTTCTG…
102	SZ0113	FRA	Freshwater	KJ878450		Berge et al., 2014	GTGATCGACGTACGCGGCCTGACCGCCACCGGCCGCTTCACATTTGACCCTGGTTTCATGTCCACGGCCTCTTGCGATTCGAAGATCACCTACATCGATGGTGATAATGGCATTCTGCTACACCGCGGCTACCCGATCGAACAACTGGCCGAGCAGTCCGACTATCTCGAAACCTGCTACCTGCTGCTCAACGGTGAACTGCCCACCGCCGAGCAGAAAGCCCAGTTCGTGGCCGTGGTCAAGAACCACACGATGGTTCACGAACAGCTCAAGACCTTTTTCAACGGTTTCCGCCGCGACGCCCACCCGATGGCCGTCATGTGCGGCGTAGTCGGCGCCCTGTCAGCGTTCTACCACGACTCACTGGACATCAATAACCCGCAGCACCGCGAGATTTCT…
102	CFBP2213	NZL	Plant	JFZI00000000		https://cirm-cfbp.fr/	ATGGCTGACAAAAAAGCGCAGTTGATCATCGAGGGCGCTGCCCCCGTCGAGCTGCCAATTCTGACCGGTACAGTGGGTCCGGACGTGATCGACGTACGCGGCCTGACCGCCACCGGCCGCTTCACATTTGACCCTGGTTTCATGTCCACGGCCTCTTGCGATTCGAAGATCACCTACATCGATGGTGATAATGGCATTCTGCTACACCGCGGCTACCCGATCGAACAACTGGCCGAGCAGTCCGACTATCTCGAAACCTGCTACCTGCTGCTCAACGGTGAACTGCCCACCGCCGAGCAGAAAGCCCAGTTCGTGGCCGTGGTCAAGAACCACACGATGGTTCACGAACAGCTCAAGACCTTTTTCAACGGTTTCCGCCGCGACGCCCACCCGATGGCC…
103	CFBP2256	GRC	Plant	KJ878109		Berge et al., 2014	CACCGGCCGCTTCACATTTGACCCTGGTTTCATGTCCACGGCCTCTTGCGATTCGAAGATCACCTACATCGATGGTGACAATGGCATTCTGCTACACCGTGGCTACCCGATCGAACAACTGGCCGAGCAGTCCGACTATCTCGAAACCTGCTACCTGCTGCTCAACGGTGAACTGCCCACCGCCGAGCAGAAAGCCCAGTTCGTGGCCGTGGTCAAGAACCACACGATGGTTCACGAACAGCTCAAGACCTTTTTCAACGGTTTCCGCCGCGACGCCCACCCGATGGCCGTCATGTGTGGCGTAGTCGGCGCCCTGTCAGCGTTCTACCACGACTCACTGGACATCAATAACCCGCAGCATCGCGAGATTTCTGCGGTCCGCCTGGTCGCCAAAATGCC…
103	M301072PT	JPN	Plant	AEAH00000000		Berge et al., 2014	ATGGCTGACAAAAAAGCGCAGTTGATCATCGAGGGCGCTGCCCCCGTCGAGCTGCCAATTCTGACCGGTACAGTGGGTCCGGACGTGATCGACGTACGCGGCCTGACCGCCACCGGCCGCTTCACATTTGACCCTGGTTTCATGTCCACGGCCTCTTGCGATTCGAAGATCACCTACATCGATGGTGACAATGGCATTCTGCTACACCGTGGCTACCCGATCGAACAACTGGCCGAGCAGTCCGACTATCTCGAAACCTGCTACCTGCTGCTCAACGGTGAACTGCCCACCGCCGAGCAGAAAGCCCAGTTCGTGGCCGTGGTCAAGAACCACACGATGGTTCACGAACAGCTCAAGACCTTTTTCAACGGTTTCCGCCGCGACGCCCACCCGATGGCC…
103	T3W0005	FRA	Groundwater	KJ878482		Berge et al., 2014	GAGGGCGCTGCCCCCGTCGAGCTGCCAATTCTGACCGGTACAGTGGGTCCGGACGTGATCGACGTACGCGGCCTGACCGCCACCGGCCGCTTCACATTTGACCCTGGTTTCATGTCCACGGCCTCTTGCGATTCGAAGATCACCTACATCGATGGTGACAATGGCATTCTGCTACACCGTGGCTACCCGATCGAACAACTGGCCGAGCAGTCCGACTATCTCGAAACCTGCTACCTGCTGCTCAACGGTGAACTGCCCACCGCCGAGCAGAAAGCCCAGTTCGTGGCCGTGGTCAAGAACCACACGATGGTTCACGAACAGCTCAAGACCTTTTTCAACGGTTTCCGCCGCGACGCCCACCCGATGGCCGTCATGTGTGGCGTAGTCGGCGCCCTGTCA…
103	T3W0028	FRA	Groundwater	KJ878486		Berge et al., 2014	AGGGCGCTGCCCCCGTCGAGCTGCCAATTCTGACCGGTACAGTGGGTCCGGACGTGATCGACGTACGCGGCCTGACCGCCACCGGCCGCTTCACATTTGACCCTGGTTTCATGTCCACGGCCTCTTGCGATTCGAAGATCACCTACATCGATGGTGACAATGGCATTCTGCTACACCGTGGCTACCCGATCGAACAACTGGCCGAGCAGTCCGACTATCTCGAAACCTGCTACCTGCTGCTCAACGGTGAACTGCCCACCGCCGAGCAGAAAGCCCAGTTCGTGGCCGTGGTCAAGAACCACACGATGGTTCACGAACAGCTCAAGACCTTTTTCAACGGTTTCCGCCGCGACGCCCACCCGATGGCCGTCATGTGTGGCGTAGTCGGCGCCCTGTCAG…
104	AI0075	NZL	Freshwater	KJ877825		Berge et al., 2014	TGATCGACGTACGCGGCCTGACCGCCACCGGCCGCTTCACATTTGACCCTGGTTTCATGTCCACGGCCTCTTGCGATTCGAAGATCACCTACATTGATGGTGATAATGGCATTCTGCTACACCGCGGCTACCCGATCGAACAACTGGCCGAGCAGTCCGACTATCTCGAAACCTGCTACCTGCTGCTCAACGGTGAACTGCCCACCGCCGAGCAGAAAGCCCAGTTCGTGGCCGTGGTCAAGAACCACACGATGGTTCACGAACAGCTCAAGACCTTTTTCAACGGCTTCCGCCGCGACGCCCACCCGATGGCCGTCATGTGTGGCGTAGTCGGCGCCCTGTCAGCGTTCTACCACGACTCACTGGACATCAATAACCCGCAGCACCGCGAGATTTCTG…
104	CCE0659	FRA	Leaf_litter	KJ878000		Berge et al., 2014	ACGTACGCGGCCTGACCGCCACCGGCCGCTTCACATTTGACCCTGGTTTCATGTCCACGGCCTCTTGCGATTCGAAGATCACCTACATTGATGGTGATAATGGCATTCTGCTACACCGCGGCTACCCGATCGAACAACTGGCCGAGCAGTCCGACTATCTCGAAACCTGCTACCTGCTGCTCAACGGTGAACTGCCCACCGCCGAGCAGAAAGCCCAGTTCGTGGCCGTGGTCAAGAACCACACGATGGTTCACGAACAGCTCAAGACCTTTTTCAACGGCTTCCGCCGCGACGCCCACCCGATGGCCGTCATGTGTGGCGTAGTCGGCGCCCTGTCAGCGTTCTACCACGACTCACTGGACATCAATAACCCGCAGCACCGCGAGATTTCTGCGGTCC…
104	CCE0902	FRA	Leaf_litter	KJ878025		Berge et al., 2014	GAGGGCGCTGCCCCCGTCGAGCTGCCAATTCTGACCGGTACAGTGGGTCCGGACGTGATCGACGTACGCGGCCTGACCGCCACCGGCCGCTTCACATTTGACCCTGGTTTCATGTCCACGGCCTCTTGCGATTCGAAGATCACCTACATTGATGGTGATAATGGCATTCTGCTACACCGCGGCTACCCGATCGAACAACTGGCCGAGCAGTCCGACTATCTCGAAACCTGCTACCTGCTGCTCAACGGTGAACTGCCCACCGCCGAGCAGAAAGCCCAGTTCGTGGCCGTGGTCAAGAACCACACGATGGTTCACGAACAGCTCAAGACCTTTTTCAACGGCTTCCGCCGCGACGCCCACCCGATGGCCGTCATGTGTGGCGTAGTCGGCGCCCTGTCA…
104	CCV0609	FRA	Snowpack	KJ878089		Berge et al., 2014	CGTACGCGGCCTGACCGCCACCGGCCGCTTCACATTTGACCCTGGTTTCATGTCCACGGCCTCTTGCGATTCGAAGATCACCTACATTGATGGTGATAATGGCATTCTGCTACACCGCGGCTACCCGATCGAACAACTGGCCGAGCAGTCCGACTATCTCGAAACCTGCTACCTGCTGCTCAACGGTGAACTGCCCACCGCCGAGCAGAAAGCCCAGTTCGTGGCCGTGGTCAAGAACCACACGATGGTTCACGAACAGCTCAAGACCTTTTTCAACGGCTTCCGCCGCGACGCCCACCCGATGGCCGTCATGTGTGGCGTAGTCGGCGCCCTGTCAGCGTTCTACCACGACTCACTGGACATCAATAACCCGCAGCACCGCGAGATTTCTGCGGTCCG…
104	CLA0071	FRA	Snowfall	KJ878112		Berge et al., 2014	GAGGGCGCTGCCCCCGTCGAGCTGCCAATTCTGACCGGTACAGTGGGTCCGGACGTGATCGACGTACGCGGCCTGACCGCCACCGGCCGCTTCACATTTGACCCTGGTTTCATGTCCACGGCCTCTTGCGATTCGAAGATCACCTACATTGATGGTGATAATGGCATTCTGCTACACCGCGGCTACCCGATCGAACAACTGGCCGAGCAGTCCGACTATCTCGAAACCTGCTACCTGCTGCTCAACGGTGAACTGCCCACCGCCGAGCAGAAAGCCCAGTTCGTGGCCGTGGTCAAGAACCACACGATGGTTCACGAACAGCTCAAGACCTTTTTCAACGGCTTCCGCCGCGACGCCCACCCGATGGCCGTCATGTGTGGCGTAGTCGGCGCCCTGTCA…
104	CMW0031	FRA	Freshwater	KJ878169		Berge et al., 2014	GGCGCTGCCCCCGTCGAGCTGCCAATTCTGACCGGTACAGTGGGTCCGGACGTGATCGACGTACGCGGCCTGACCGCCACCGGCCGCTTCACATTTGACCCTGGTTTCATGTCCACGGCCTCTTGCGATTCGAAGATCACCTACATTGATGGTGATAATGGCATTCTGCTACACCGCGGCTACCCGATCGAACAACTGGCCGAGCAGTCCGACTATCTCGAAACCTGCTACCTGCTGCTCAACGGTGAACTGCCCACCGCCGAGCAGAAAGCCCAGTTCGTGGCCGTAGTCAAGAACCACACGATGGTTCACGAACAGCTCAAGACCTTTTTCAACGGCTTCCGCCGCGACGCCCACCCGATGGCCGTCATGTGTGGCGTAGTCGGCGCCCTGTCAGCG…
104	CST0005	FRA	Rain	KJ878180		Berge et al., 2014	GAGGGCGCTGCCCCCGTCGAGCTGCCAATTCTGACCGGTACAGTGGGTCCGGACGTGATCGACGTACGCGGCCTGACCGCCACCGGCCGCTTCACATTTGACCCTGGTTTCATGTCCACGGCCTCTTGCGATTCGAAGATCACCTACATTGATGGTGATAATGGCATTCTGCTACACCGCGGCTACCCGATCGAACAACTGGCCGAGCAGTCCGACTATCTCGAAACCTGCTACCTGCTGCTCAACGGTGAACTGCCCACCGCCGAGCAGAAAGCCCAGTTCGTGGCCGTGGTCAAGAACCACACGATGGTTCACGAACAGCTCAAGACCTTTTTCAACGGCTTCCGCCGCGACGCCCACCCGATGGCCGTCATGTGTGGCGTAGTCGGCGCCCTGTCA…
104	CSZ0400	FRA	Freshwater	KJ878265		Berge et al., 2014	GCCCCCGTCGAGCTGCCAATTCTGACCGGTACAGTGGGTCCGGACGTGATCGACGTACGCGGCCTGACCGCCACCGGCCGCTTCACATTTGACCCTGGTTTCATGTCCACGGCCTCTTGCGATTCGAAGATCACCTACATTGATGGTGATAATGGCATTCTGCTACACCGCGGCTACCCGATCGAACAACTGGCCGAGCAGTCCGACTATCTCGAAACCTGCTACCTGCTGCTCAACGGTGAACTGCCCACCGCCGAGCAGAAAGCCCAGTTCGTGGCCGTGGTCAAGAACCACACGATGGTTCACGAACAGCTCAAGACCTTTTTCAACGGCTTCCGCCGCGACGCCCACCCGATGGCCGTCATGTGTGGCGTAGTCGGCGCCCTGTCAGCGTTCTAC…
104	CSZ0803	FRA	Leaf_litter	KJ878278		Berge et al., 2014	TACGCGGCCTGACCGCCACCGGCCGCTTCACATTTGACCCTGGTTTCATGTCCACGGCCTCTTGCGATTCGAAGATCACCTACATTGATGGTGATAATGGCATTCTGCTACACCGCGGCTACCCGATCGAACAACTGGCCGAGCAGTCCGACTATCTCGAAACCTGCTACCTGCTGCTCAACGGTGAACTGCCCACCGCCGAGCAGAAAGCCCAGTTCGTGGCCGTGGTCAAGAACCACACGATGGTTCACGAACAGCTCAAGACCTTTTTCAACGGCTTCCGCCGCGACGCCCACCCGATGGCCGTCATGTGTGGCGTAGTCGGCGCCCTGTCAGCGTTCTACCACGACTCACTGGACATCAATAACCCGCAGCACCGCGAGATTTCTGCGGTCCGCC…
104	CVB0052	FRA	Biofilm	KJ878309		Berge et al., 2014	GAGGGCGCTGCCCCCGTCGAGCTGCCAATTCTGACCGGTACAGTGGGTCCGGACGTGATCGACGTACGCGGCCTGACCGCCACCGGCCGCTTCACATTTGACCCTGGTTTCATGTCCACGGCCTCTTGCGATTCGAAGATCACCTACATTGATGGTGATAATGGCATTCTGCTACACCGCGGCTACCCGATCGAACAACTGGCCGAGCAGTCCGACTATCTCGAAACCTGCTACCTGCTGCTCAACGGTGAACTGCCCACCGCCGAGCAGAAAGCCCAGTTCGTGGCCGTGGTCAAGAACCACACGATGGTTCACGAACAGCTCAAGACCTTTTTCAACGGCTTCCGCCGCGACGCCCACCCGATGGCCGTCATGTGTGGCGTAGTCGGCGCCCTGTCA…
104	SZ0038	FRA	Freshwater	KJ878439		Berge et al., 2014	GATCGACGTACGCGGCCTGACCGCCACCGGCCGCTTCACATTTGACCCTGGTTTCATGTCCACGGCCTCTTGCGATTCGAAGATCACCTACATTGATGGTGATAATGGCATTCTGCTACACCGCGGCTACCCGATCGAACAACTGGCCGAGCAGTCCGACTATCTCGAAACCTGCTACCTGCTGCTCAACGGTGAACTGCCCACCGCCGAGCAGAAAGCCCAGTTCGTGGCCGTGGTCAAGAACCACACGATGGTTCACGAACAGCTCAAGACCTTTTTCAACGGCTTCCGCCGCGACGCCCACCCGATGGCCGTCATGTGTGGCGTAGTCGGCGCCCTGTCAGCGTTCTACCACGACTCACTGGACATCAATAACCCGCAGCACCGCGAGATTTCTGC…
104	T3W0006	FRA	Groundwater	KJ878483		Berge et al., 2014	GAGGGCGCTGCCCCCGTCGAGCTGCCAATTCTGACCGGTACAGTGGGTCCGGACGTGATCGACGTACGCGGCCTGACCGCCACCGGCCGCTTCACATTTGACCCTGGTTTCATGTCCACGGCCTCTTGCGATTCGAAGATCACCTACATTGATGGTGATAATGGCATTCTGCTACACCGCGGCTACCCGATCGAACAACTGGCCGAGCAGTCCGACTATCTCGAAACCTGCTACCTGCTGCTCAACGGTGAACTGCCCACCGCCGAGCAGAAAGCCCAGTTCGTGGCCGTGGTCAAGAACCACACGATGGTTCACGAACAGCTCAAGACCTTTTTCAACGGCTTCCGCCGCGACGCCCACCCGATGGCCGTCATGTGTGGCGTAGTCGGCGCCCTGTCA…
104	USA0087	USA	Freshwater	KJ878540		Berge et al., 2014	GATCGACGTACGCGGCCTGACCGCCACCGGCCGCTTCACATTTGACCCTGGTTTCATGTCCACGGCCTCTTGCGATTCGAAGATCACCTACATTGATGGTGATAATGGCATTCTGCTACACCGCGGCTACCCGATCGAACAACTGGCCGAGCAGTCCGACTATCTCGAAACCTGCTACCTGCTGCTCAACGGTGAACTGCCCACCGCCGAGCAGAAAGCCCAGTTCGTGGCCGTGGTCAAGAACCACACGATGGTTCACGAACAGCTCAAGACCTTTTTCAACGGCTTCCGCCGCGACGCCCACCCGATGGCCGTCATGTGTGGCGTAGTCGGCGCCCTGTCAGCGTTCTACCACGACTCACTGGACATCAATAACCCGCAGCACCGCGAGATTTCTGC…
104	JFJ-0052	CHE	Snowfall	KY379262		Stopelli et al, 2017	CGCTGCCCCCGTCGAGCTGCCAATACTGACCGGTACAGTGGGTCCGGACGTGATCGACGTACGCGGTCTGACCGCCACCGGCCGCTTCACATTTGACCCTGGTTTCATGTCCACGGCCTCTTGCGAGTCGAAGATCACCTACATCGATGGTGACAACGGAATTCTGCTGCACCGCGGCTACCCGATCGAACAACTGGCCGAGCAGTCCGATTACCTCGAGACCTGCTACCTGTTGCTCAACGGCGAGCTGCCAACCGCCGAACAGAAAGCCCAGTTCGTGGCCGTGGTCAAGAACCACACGATGGTTCACGAACAACTCAAGACCTTCTTCAACGGCTTTCGCCGTGACGCCCACCCGATGGCCGTCATGTGCGGTGTAGTCGGCGCCCTGTCGGCGTT…
104	JFJ-0054	CHE	Snowfall	KY379264		Stopelli et al, 2017	GAGGGCGCTGCCCCCGTCGAGCTGCCAATACTGACCGGTACAGTGGGTCCGGACGTGATCGACGTACGCGGTCTGACCGCCACCGGCCGCTTCACATTTGACCCTGGTTTCATGTCCACGGCCTCTTGCGAGTCGAAGATCACCTACATCGATGGTGACAACGGAATTCTGCTGCACCGCGGCTACCCGATCGAACAACTGGCCGAGCAGTCCGATTACCTCGAGACCTGCTACCTGTTGCTCAACGGCGAGCTGCCAACCGCCGAACAGAAAGCCCAGTTCGTGGCCGTGGTCAAGAACCACACGATGGTTCACGAACAACTCAAGACCTTCTTCAACGGCTTTCGCCGTGACGCCCACCCGATGGCCGTCATGTGCGGTGTAGTCGGCGCCCTGTCG…
105	UB0410	FRA	Freshwater	KJ878521		Berge et al., 2014	GTGATCGACGTACGCGGCCTGACCGCCACCGGCCGCTTCACATTTGACCCTGGTTTCATGTCCACGGCCTCTTGCGATTCGAAGATCACCTACATCGATGGTGATAATGGCATTCTGCTACATCGCGGCTACCCGATCGAACAACTGGCCGAGCAGTCCGACTATCTCGAAACCTGCTACCTGCTGCTCAACGGTGAACTGCCCACCGCCGAGCAAAAAGCCCAGTTCGTGGCCGTGGTCAAGAACCACACGATGGTTCACGAACAGCTCAAGACCTTTTTCAACGGTTTCCGCCGCGACGCCCACCCGATGGCCGTCATGTGTGGCGTAGTCGGCGCCCTGTCAGCGTTCTACCACGACTCACTGGACATCAATAACCCGCAGCACCGCGAGATTTCT…
105	UB0415	FRA	Freshwater	KJ878522		Berge et al., 2014	GACGTACGCGGCCTGACCGCCACCGGCCGCTTCACATTTGACCCTGGTTTCATGTCCACGGCCTCTTGCGATTCGAAGATCACCTACATCGATGGTGATAATGGCATTCTGCTACATCGCGGCTACCCGATCGAACAACTGGCCGAGCAGTCCGACTATCTCGAAACCTGCTACCTGCTGCTCAACGGTGAACTGCCCACCGCCGAGCAAAAAGCCCAGTTCGTGGCCGTGGTCAAGAACCACACGATGGTTCACGAACAGCTCAAGACCTTTTTCAACGGTTTCCGCCGCGACGCCCACCCGATGGCCGTCATGTGTGGCGTAGTCGGCGCCCTGTCAGCGTTCTACCACGACTCACTGGACATCAATAACCCGCAGCACCGCGAGATTTCTGCGGTC…
105	UB0419	FRA	Freshwater	KJ878524		Berge et al., 2014	CGTGATCGACGTACGCGGCCTGACCGCCACCGGCCGCTTCACATTTGACCCTGGTTTCATGTCCACGGCCTCTTGCGATTCGAAGATCACCTACATCGATGGTGATAATGGCATTCTGCTACATCGCGGCTACCCGATCGAACAACTGGCCGAGCAGTCCGACTATCTCGAAACCTGCTACCTGCTGCTCAACGGTGAACTGCCCACCGCCGAGCAAAAAGCCCAGTTCGTGGCCGTGGTCAAGAACCACACGATGGTTCACGAACAGCTCAAGACCTTTTTCAACGGTTTCCGCCGCGACGCCCACCCGATGGCCGTCATGTGTGGCGTAGTCGGCGCCCTGTCAGCGTTCTACCACGACTCACTGGACATCAATAACCCGCAGCACCGCGAGATTTC…
106	CCE0215	FRA	Freshwater	KJ877958		Berge et al., 2014	GCCCCCGTCGAGCTGCCAATTCTGACCGGTACAGTGGGTCCGGACGTGATCGACGTACGCGGCCTGACCGCCACCGGCCGCTTCACATTTGACCCTGGTTTCATGTCCACGGCCTCTTGCGATTCGAAGATCACCTACATCGATGGTGATAATGGCATTCTGCTACACCGCGGCTACCCGATCGAACAACTGGCCGAGCAGTCCGACTATCTCGAAACCTGCTACCTGCTGCTCAACGGTGAACTGCCCACCGCCGAGCAAAAAGCCCAGTTCGTGGCCGTGGTCAAGAACCACACGATGGTTCACGAACAGCTCAAGACCTTTTTCAACGGTTTCCGCCGCGACGCCCACCCGATGGCCGTCATGTGTGGCGTAGTCGGCGCCCTGTCAGCGTTCTAC…
106	CCE0588	FRA	Snowpack	KJ877983		Berge et al., 2014	CGCTGCCCCCGTCGAGCTGCCAATTCTGACCGGTACAGTGGGTCCGGACGTGATCGACGTACGCGGCCTGACCGCCACCGGCCGCTTCACATTTGACCCTGGTTTCATGTCCACGGCCTCTTGCGATTCGAAGATCACCTACATCGATGGTGATAATGGCATTCTGCTACACCGCGGCTACCCGATCGAACAACTGGCCGAGCAGTCCGACTATCTCGAAACCTGCTACCTGCTGCTCAACGGTGAACTGCCCACCGCCGAGCAAAAAGCCCAGTTCGTGGCCGTGGTCAAGAACCACACGATGGTTCACGAACAGCTCAAGACCTTTTTCAACGGTTTCCGCCGCGACGCCCACCCGATGGCCGTCATGTGTGGCGTAGTCGGCGCCCTGTCAGCGTT…
106	CCE0938	FRA	Leaf_litter	KJ878033		Berge et al., 2014	TACGCGGCCTGACCGCCACCGGCCGCTTCACATTTGACCCTGGTTTCATGTCCACGGCCTCTTGCGATTCGAAGATCACCTACATCGATGGTGATAATGGCATTCTGCTACACCGCGGCTACCCGATCGAACAACTGGCCGAGCAGTCCGACTATCTCGAAACCTGCTACCTGCTGCTCAACGGTGAACTGCCCACCGCCGAGCAAAAAGCCCAGTTCGTGGCCGTGGTCAAGAACCACACGATGGTTCACGAACAGCTCAAGACCTTTTTCAACGGTTTCCGCCGCGACGCCCACCCGATGGCCGTCATGTGTGGCGTAGTCGGCGCCCTGTCAGCGTTCTACCACGACTCACTGGACATCAATAACCCGCAGCACCGCGAGATTTCTGCGGTCCGCC…
106	CCV0177	FRA	Freshwater	KJ878066		Berge et al., 2014	GCCCCCGTCGAGCTGCCAATTCTGACCGGTACAGTGGGTCCGGACGTGATCGACGTACGCGGCCTGACCGCCACCGGCCGCTTCACATTTGACCCTGGTTTCATGTCCACGGCCTCTTGCGATTCGAAGATCACCTACATCGATGGTGATAATGGCATTCTGCTACACCGCGGCTACCCGATCGAACAACTGGCCGAGCAGTCCGACTATCTCGAAACCTGCTACCTGCTGCTCAACGGTGAACTGCCCACCGCCGAGCAAAAAGCCCAGTTCGTGGCCGTGGTCAAGAACCACACGATGGTTCACGAACAGCTCAAGACCTTTTTCAACGGTTTCCGCCGCGACGCCCACCCGATGGCCGTCATGTGTGGCGTAGTCGGCGCCCTGTCAGCGTTCTAC…
106	LAB0086	FRA	Biofilm	KJ878389		Berge et al., 2014	GAGGGCGCTGCCCCCGTCGAGCTGCCAATTCTGACCGGTACAGTGGGTCCGGACGTGATCGACGTACGCGGCCTGACCGCCACCGGCCGCTTCACATTTGACCCTGGTTTCATGTCCACGGCCTCTTGCGATTCGAAGATCACCTACATCGATGGTGATAATGGCATTCTGCTACACCGCGGCTACCCGATCGAACAACTGGCCGAGCAGTCCGACTATCTCGAAACCTGCTACCTGCTGCTCAACGGTGAACTGCCCACCGCCGAGCAAAAAGCCCAGTTCGTGGCCGTGGTCAAGAACCACACGATGGTTCACGAACAGCTCAAGACCTTTTTCAACGGTTTCCGCCGCGACGCCCACCCGATGGCCGTCATGTGTGGCGTAGTCGGCGCCCTGTCA…
107	AF0012	NZL	Freshwater	KJ877802		Berge et al., 2014	CGACGTACGCGGCCTGACCGCCACCGGCCGCTTCACATTTGACCCTGGTTTCATGTCCACGGCCTCTTGCGATTCGAAGATCACCTACATCGATGGTGATAATGGCATTCTGCTACATCGCGGCTACCCGATCGAACAACTGGCCGAGCAGTCCGACTACCTCGAAACCTGCTACCTGCTGCTCAACGGTGAACTGCCCACCGCCGAGCAGAAAGCCCAGTTCGTGGCCGTGGTCAAGAATCACACGATGGTTCACGAACAGCTCAAGACCTTTTTCAACGGTTTCCGCCGCGACGCCCACCCGATGGCCGTCATGTGTGGCGTAGTCGGCGCCCTGTCAGCGTTCTACCACGACTCGCTGGACATCAATAACCCGCAGCACCGCGAGATTTCCGCGGT…
107	CCE0587	FRA	Snowpack	KJ877982		Berge et al., 2014	TCGACGTACGCGGCCTGACCGCCACCGGCCGCTTCACATTTGACCCTGGTTTCATGTCCACGGCCTCTTGCGATTCGAAGATCACCTACATCGATGGTGATAATGGCATTCTGCTACATCGCGGCTACCCGATCGAACAACTGGCCGAGCAGTCCGACTACCTCGAAACCTGCTACCTGCTGCTCAACGGTGAACTGCCCACCGCCGAGCAGAAAGCCCAGTTCGTGGCCGTGGTCAAGAATCACACGATGGTTCACGAACAGCTCAAGACCTTTTTCAACGGTTTCCGCCGCGACGCCCACCCGATGGCCGTCATGTGTGGCGTAGTCGGCGCCCTGTCAGCGTTCTACCACGACTCGCTGGACATCAATAACCCGCAGCACCGCGAGATTTCCGCGG…
107	CCE0977	FRA	Freshwater	KJ878040		Berge et al., 2014	GCCCCCGTCGAGCTGCCAATTCTGACCGGTACAGTGGGTCCGGACGTGATCGACGTACGCGGCCTGACCGCCACCGGCCGCTTCACATTTGACCCTGGTTTCATGTCCACGGCCTCTTGCGATTCGAAGATCACCTACATCGATGGTGATAATGGCATTCTGCTACATCGCGGCTACCCGATCGAACAACTGGCCGAGCAGTCCGACTACCTCGAAACCTGCTACCTGCTGCTCAACGGTGAACTGCCCACCGCCGAGCAGAAAGCCCAGTTCGTGGCCGTGGTCAAGAATCACACGATGGTTCACGAACAGCTCAAGACCTTTTTCAACGGTTTCCGCCGCGACGCCCACCCGATGGCCGTCATGTGTGGCGTAGTCGGCGCCCTGTCAGCGTTCTAC…
107	CCV0088	FRA	Freshwater	KJ878048		Berge et al., 2014	GCCCCCGTCGAGCTGCCAATTCTGACCGGTACAGTGGGTCCGGACGTGATCGACGTACGCGGCCTGACCGCCACCGGCCGCTTCACATTTGACCCTGGTTTCATGTCCACGGCCTCTTGCGATTCGAAGATCACCTACATCGATGGTGATAATGGCATTCTGCTACATCGCGGCTACCCGATCGAACAACTGGCCGAGCAGTCCGACTACCTCGAAACCTGCTACCTGCTGCTCAACGGTGAACTGCCCACCGCCGAGCAGAAAGCCCAGTTCGTGGCCGTGGTCAAGAATCACACGATGGTTCACGAACAGCTCAAGACCTTTTTCAACGGTTTCCGCCGCGACGCCCACCCGATGGCCGTCATGTGTGGCGTAGTCGGCGCCCTGTCAGCGTTCTAC…
107	CCV0416	FRA	Snowfall	KJ878076		Berge et al., 2014	GAGGGCGCTGCCCCCGTCGAGCTGCCAATTCTGACCGGTACAGTGGGTCCGGACGTGATCGACGTACGCGGCCTGACCGCCACCGGCCGCTTCACATTTGACCCTGGTTTCATGTCCACGGCCTCTTGCGATTCGAAGATCACCTACATCGATGGTGATAATGGCATTCTGCTACATCGCGGCTACCCGATCGAACAACTGGCCGAGCAGTCCGACTACCTCGAAACCTGCTACCTGCTGCTCAACGGTGAACTGCCCACCGCCGAGCAGAAAGCCCAGTTCGTGGCCGTGGTCAAGAATCACACGATGGTTCACGAACAGCTCAAGACCTTTTTCAACGGTTTCCGCCGCGACGCCCACCCGATGGCCGTCATGTGTGGCGTAGTCGGCGCCCTGTCA…
107	CCV0420	FRA	Snowfall	KJ878077		Berge et al., 2014	GAGGGCGCTGCCCCCGTCGAGCTGCCAATTCTGACCGGTACAGTGGGTCCGGACGTGATCGACGTACGCGGCCTGACCGCCACCGGCCGCTTCACATTTGACCCTGGTTTCATGTCCACGGCCTCTTGCGATTCGAAGATCACCTACATCGATGGTGATAATGGCATTCTGCTACATCGCGGCTACCCGATCGAACAACTGGCCGAGCAGTCCGACTACCTCGAAACCTGCTACCTGCTGCTCAACGGTGAACTGCCCACCGCCGAGCAGAAAGCCCAGTTCGTGGCCGTGGTCAAGAATCACACGATGGTTCACGAACAGCTCAAGACCTTTTTCAACGGTTTCCGCCGCGACGCCCACCCGATGGCCGTCATGTGTGGCGTAGTCGGCGCCCTGTCA…
107	CMO0043	FRA	Rain	KJ878147		Berge et al., 2014	GAGGGCGCTGCCCCCGTCGAGCTGCCAATTCTGACCGGTACAGTGGGTCCGGACGTGATCGACGTACGCGGCCTGACCGCCACCGGCCGCTTCACATTTGACCCTGGTTTCATGTCCACGGCCTCTTGCGATTCGAAGATCACCTACATCGATGGTGATAATGGCATTCTGCTACATCGCGGCTACCCGATCGAACAACTGGCCGAGCAGTCCGACTACCTCGAAACCTGCTACCTGCTGCTCAACGGTGAACTGCCCACCGCCGAGCAGAAAGCCCAGTTCGTGGCCGTGGTCAAGAATCACACGATGGTTCACGAACAGCTCAAGACCTTTTTCAACGGTTTCCGCCGCGACGCCCACCCGATGGCCGTCATGTGTGGCGTAGTCGGCGCCCTGTCA…
107	CSZ0255	FRA	Freshwater	KJ878219		Berge et al., 2014	GCCCCCGTCGAGCTGCCAATTCTGACCGGTACAGTGGGTCCGGACGTGATCGACGTACGCGGCCTGACCGCCACCGGCCGCTTCACATTTGACCCTGGTTTCATGTCCACGGCCTCTTGCGATTCGAAGATCACCTACATCGATGGTGATAATGGCATTCTGCTACATCGCGGCTACCCGATCGAACAACTGGCCGAGCAGTCCGACTACCTCGAAACCTGCTACCTGCTGCTCAACGGTGAACTGCCCACCGCCGAGCAGAAAGCCCAGTTCGTGGCCGTGGTCAAGAATCACACGATGGTTCACGAACAGCTCAAGACCTTTTTCAACGGTTTCCGCCGCGACGCCCACCCGATGGCCGTCATGTGTGGCGTAGTCGGCGCCCTGTCAGCGTTCTAC…
107	GAW0057	FRA	Irrigation_water	KJ878343		Berge et al., 2014	GGGCGCTGCCCCCGTCGAGCTGCCAATTCTGACCGGTACAGTGGGTCCGGACGTGATCGACGTACGCGGCCTGACCGCCACCGGCCGCTTCACATTTGACCCTGGTTTCATGTCCACGGCCTCTTGCGATTCGAAGATCACCTACATCGATGGTGATAATGGCATTCTGCTACATCGCGGCTACCCGATCGAACAACTGGCCGAGCAGTCCGACTACCTCGAAACCTGCTACCTGCTGCTCAACGGTGAACTGCCCACCGCCGAGCAGAAAGCCCAGTTCGTGGCCGTGGTCAAGAATCACACGATGGTTCACGAACAGCTCAAGACCTTTTTCAACGGTTTCCGCCGCGACGCCCACCCGATGGCCGTCATGTGTGGCGTAGTCGGCGCCCTGTCAGC…
107	GAW0133	FRA	Irrigation_water	KJ878353		Berge et al., 2014	GGGCGCTGCCCCCGTCGAGCTGCCAATTCTGACCGGTACAGTGGGTCCGGACGTGATCGACGTACGCGGCCTGACCGCCACCGGCCGCTTCACATTTGACCCTGGTTTCATGTCCACGGCCTCTTGCGATTCGAAGATCACCTACATCGATGGTGATAATGGCATTCTGCTACATCGCGGCTACCCGATCGAACAACTGGCCGAGCAGTCCGACTACCTCGAAACCTGCTACCTGCTGCTCAACGGTGAACTGCCCACCGCCGAGCAGAAAGCCCAGTTCGTGGCCGTGGTCAAGAATCACACGATGGTTCACGAACAGCTCAAGACCTTTTTCAACGGTTTCCGCCGCGACGCCCACCCGATGGCCGTCATGTGTGGCGTAGTCGGCGCCCTGTCAGC…
108	CCE0586	FRA	Snowpack	KJ877981		Berge et al., 2014	CACCGGCCGCTTCACATTTGACCCTGGTTTCATGTCCACGGCCTCTTGCGATTCGAAGATCACCTACATCGATGGTGATAATGGCATTCTGCTACATCGCGGCTACCCGATCGAACAACTGGCCGAGCAGTCCGACTACCTCGAAACCTGCTACCTGCTGCTCAACGGTGAACTGCCCACCGCCGAGCAGAAAGCCCAGTTCGTGGCCGTGGTCAAGAACCACACGATGGTTCACGAACAGCTCAAGACCTTTTTCAACGGTTTCCGCCGCGACGCCCACCCGATGGCCGTCATGTGTGGCGTAGTCGGCGCCCTGTCAGCGTTCTACCTCGACTCGCTGGACATCAATAACCCGCAGCACGCGAGATTTCCGCGGTACGCCTGGTCGCCAAGATGCCG…
108	CCV0096	FRA	Freshwater	KJ878051		Berge et al., 2014	GCCCCCGTCGAGCTGCCAATTCTGACCGGTACAGTGGGTCCGGACGTGATCGACGTACGCGGCCTGACCGCCACCGGCCGCTTCACATTTGACCCTGGTTTCATGTCCACGGCCTCTTGCGATTCGAAGATCACCTACATCGATGGTGATAATGGCATTCTGCTACATCGCGGCTACCCGATCGAACAACTGGCCGAGCAGTCCGACTACCTCGAAACCTGCTACCTGCTGCTCAACGGTGAACTGCCCACCGCCGAGCAGAAAGCCCAGTTCGTGGCCGTGGTCAAGAACCACACGATGGTTCACGAACAGCTCAAGACCTTTTTCAACGGTTTCCGCCGCGACGCCCACCCGATGGCCGTCATGTGTGGCGTAGTCGGCGCCCTGTCAGCGTTCTAC…
109	CCE0633	FRA	Leaf_litter	KJ877989		Berge et al., 2014	TCGACGTACGCGGCCTGACCGCCACCGGCCGCTTCACATTTGACCCTGGTTTCATGTCCACGGCCTCTTGCGATTCGAAGATCACCTACATCGATGGTGATAATGGCATTCTGCTACATCGCGGCTACCCGATCGAACAACTGGCCGAGCAGTCCGACTACCTCGAAACCTGCTACCTGCTGCTCAACGGTGAACTGCCAACCGCCGAGCAGAAAGCCCAGTTCGTGGCCGTGGTCAAGAACCACACGATGGTTCACGAACAGCTCAAGACCTTTTTCAACGGTTTCCGCCGCGACGCCCACCCGATGGCCGTCATGTGTGGCGTAGTCGGCGCCCTGTCAGCGTTCTACCACGACTCGCTGGACATCAATAACCCGCAGCACCGCGAGATTTCCGCGG…
109	CCE0701	FRA	Snowpack	KJ878010		Berge et al., 2014	GACGTACGCGGCCTGACCGCCACCGGCCGCTTCACATTTGACCCTGGTTTCATGTCCACGGCCTCTTGCGATTCGAAGATCACCTACATCGATGGTGATAATGGCATTCTGCTACATCGCGGCTACCCGATCGAACAACTGGCCGAGCAGTCCGACTACCTCGAAACCTGCTACCTGCTGCTCAACGGTGAACTGCCAACCGCCGAGCAGAAAGCCCAGTTCGTGGCCGTGGTCAAGAACCACACGATGGTTCACGAACAGCTCAAGACCTTTTTCAACGGTTTCCGCCGCGACGCCCACCCGATGGCCGTCATGTGTGGCGTAGTCGGCGCCCTGTCAGCGTTCTACCACGACTCGCTGGACATCAATAACCCGCAGCACCGCGAGATTTCCGCGGTA…
110	H5E1	JPN	Plant	NA	http://genome.ppws.vt.edu/cgi-bin/MLST/home.pl	Berge et al., 2014	CACCGGCCGCTTCACATTTGACCCTGGTTTCATGTCCACGGCCTCTTGCGATTCGAAGATCACCTACATCGATGGTGATAATGGCATTCTGCTACACCGCGGCTACCCGATCGAACAGCTGGCCGAGCAGTCCGACTACCTCGAAACCTGCTACCTGCTACTCAACGGTGAACTGCCTACCGCCGAGCAGAAAGCCCAGTTCGTGGCCGTGGTCAAGAACCACACGATGGTTCACGAACAGCTCAAGACCTTTTTCAACGGTTTCCGCCGCGACGCCCACCCGATGGCCGTCATGTGTGGCGTAGTCGGCGCCCTGTCAGCGTTCTATCACGACTCGCTGGACATCAATAACCCGCAGCACCGCGAGATTTCTGCGATCCGCCTGGTCGCCAAGATGCC…
110	R6_1704B	FRA	Plant	AEAI00000000		Berge et al., 2014	GAGGGCGCTGCCCCCGTCGAGCTGCCAATTCTGACCGGTACAGTGGGTCCGGACGTGATCGACGTACGCGGCCTGACCGCCACCGGCCGCTTCACATTTGACCCTGGTTTCATGTCCACGGCCTCTTGCGATTCGAAGATCACCTACATCGATGGTGATAATGGCATTCTGCTACACCGCGGCTACCCGATCGAACAGCTGGCCGAGCAGTCCGACTACCTCGAAACCTGCTACCTGCTACTCAACGGTGAACTGCCTACCGCCGAGCAGAAAGCCCAGTTCGTGGCCGTGGTCAAGAACCACACGATGGTTCACGAACAGCTCAAGACCTTTTTCAACGGTTTCCGCCGCGACGCCCACCCGATGGCCGTCATGTGTGGCGTAGTCGGCGCCCTGTCA…
111	AI0068	NZL	Freshwater	KJ877822		Berge et al., 2014	ATTCTGACCGGTACAGTGGGTCCGGACGTGATCGACGTACGCGGCCTGACCGCCACCGGCCGCTTCACATTTGACCCTGGTTTCATGTCCACGGCCTCTTGCGATTCGAAGATCACCTACATCGATGGTGATAATGGCATTCTGCTACACCGCGGCTACCCGATCGAACAACTGGCCGAGCAGTCCGACTACCTCGAAAACCTGCTACCTGCTGCTCAACGGTGAACTGCCCACCGCCGAGCAGAAAGCCCAGTTCGTGGCCGTGGTCAAGAACCACACGATGGTTCACGAACAGCTCAAGACCTTTTTCAACGGTTTCCGCCGCGACGCCCACCCGATGGCCGTCATGTGTGGCGTAGTCGGCGCCCTGTCAGCGTTCTACCACGACTCGCTGGACAT…
111	AI0083	NZL	Freshwater	KJ877828		Berge et al., 2014	CATTCTGACCGGTACAGTGGGTCCGGACGTGATCGACGTACGCGGCCTGACCGCCACCGGCCGCTTCACATTTGACCCTGGTTTCATGTCCACGGCCTCTTGCGATTCGAAGATCACCTACATCGATGGTGATAATGGCATTCTGCTACACCGCGGCTACCCGATCGAACAACTGGCCGAGCAGTCCGACTACCTCGAAACCTGCTACCTGCTGCTCAACGGTGAACTGCCCACCGCCGAGCAGAAAGCCCAGTTCGTGGCCGTGGTCAAGAACCACACGATGGTTCACGAACAGCTCAAGACCTTTTTCAACGGTTTCCGCCGCGACGCCCACCCGATGGCCGTCATGTGTGGCGTAGTCGGCGCCCTGTCAGCGTTCTACCACGACTCGCTGGACAT…
111	AI0134	NZL	Freshwater	KJ877838		Berge et al., 2014	ATTCTGACCGGTACAGTGGGTCCGGACGTGATCGACGTACGCGGCCTGACCGCCACCGGCCGCTTCACATTTGACCCTGGTTTCATGTCCACGGCCTCTTGCGATTCGAAGATCACCTACATCGATGGTGATAATGGCATTCTGCTACACCGCGGCTACCCGATCGAACAACTGGCCGAGCAGTCCGACTACCTCGAAACCTGCTACCTGCTGCTCAACGGTGAACTGCCCACCGCCGAGCAGAAAGCCCAGTTCGTGGCCGTGGTCAAGAACCACACGATGGTTCACGAACAGCTCAAGACCTTTTTCAACGGTTTCCGCCGCGACGCCCACCCGATGGCCGTCATGTGTGGCGTAGTCGGCGCCCTGTCAGCGTTCTACCACGACTCGCTGGACATC…
111	CCV0169	FRA	Freshwater	KJ878063		Berge et al., 2014	GCCCCCGTCGAGCTGCCAATTCTGACCGGTACAGTGGGTCCGGACGTGATCGACGTACGCGGCCTGACCGCCACCGGCCGCTTCACATTTGACCCTGGTTTCATGTCCACGGCCTCTTGCGATTCGAAGATCACCTACATCGATGGTGATAATGGCATTCTGCTACACCGCGGCTACCCGATCGAACAACTGGCCGAGCAGTCCGACTACCTCGAAACCTGCTACCTGCTGCTCAACGGTGAACTGCCCACCGCCGAGCAGAAAGCCCAGTTCGTGGCCGTGGTCAAGAACCACACGATGGTTCACGAACAGCTCAAGACCTTTTTCAACGGTTTCCGCCGCGACGCCCACCCGATGGCCGTCATGTGTGGCGTAGTCGGCGCCCTGTCAGCGTTCTAC…
111	CST0069	FRA	Rain	KJ878186		Berge et al., 2014	GAGGGCGCTGCCCCCGTCGAGCTGCCAATTCTGACCGGTACAGTGGGTCCGGACGTGATCGACGTACGCGGCCTGACCGCCACCGGCCGCTTCACATTTGACCCTGGTTTCATGTCCACGGCCTCTTGCGATTCGAAGATCACCTACATCGATGGTGATAATGGCATTCTGCTACACCGCGGCTACCCGATCGAACAACTGGCCGAGCAGTCCGACTACCTCGAAACCTGCTACCTGCTGCTCAACGGTGAACTGCCCACCGCCGAGCAGAAAGCCCAGTTCGTGGCCGTGGTCAAGAACCACACGATGGTTCACGAACAGCTCAAGACCTTTTTCAACGGTTTCCGCCGCGACGCCCACCCGATGGCCGTCATGTGTGGCGTAGTCGGCGCCCTGTCA…
111	CST0092	FRA	Rain	KJ878195		Berge et al., 2014	AGGGCGCTGCCCCCGTCGAGCTGCCAATTCTGACCGGTACAGTGGGTCCGGACGTGATCGACGTACGCGGCCTGACCGCCACCGGCCGCTTCACATTTGACCCTGGTTTCATGTCCACGGCCTCTTGCGATTCGAAGATCACCTACATCGATGGTGATAATGGCATTCTGCTACACCGCGGCTACCCGATCGAACAACTGGCCGAGCAGTCCGACTACCTCGAAACCTGCTACCTGCTGCTCAACGGTGAACTGCCCACCGCCGAGCAGAAAGCCCAGTTCGTGGCCGTGGTCAAGAACCACACGATGGTTCACGAACAGCTCAAGACCTTTTTCAACGGTTTCCGCCGCGACGCCCACCCGATGGCCGTCATGTGTGGCGTAGTCGGCGCCCTGTCAG…
111	CSZ0177	FRA	Freshwater	KJ878207		Berge et al., 2014	GCCCCCGTCGAGCTGCCAATTCTGACCGGTACAGTGGGTCCGGACGTGATCGACGTACGCGGCCTGACCGCCACCGGCCGCTTCACATTTGACCCTGGTTTCATGTCCACGGCCTCTTGCGATTCGAAGATCACCTACATCGATGGTGATAATGGCATTCTGCTACACCGCGGCTACCCGATCGAACAACTGGCCGAGCAGTCCGACTACCTCGAAACCTGCTACCTGCTGCTCAACGGTGAACTGCCCACCGCCGAGCAGAAAGCCCAGTTCGTGGCCGTGGTCAAGAACCACACGATGGTTCACGAACAGCTCAAGACCTTTTTCAACGGTTTCCGCCGCGACGCCCACCCGATGGCCGTCATGTGTGGCGTAGTCGGCGCCCTGTCAGCGTTCTAC…
111	CVB0004	FRA	Biofilm	KJ878299		Berge et al., 2014	GAGGGCGCTGCCCCCGTCGAGCTGCCAATTCTGACCGGTACAGTGGGTCCGGACGTGATCGACGTACGCGGCCTGACCGCCACCGGCCGCTTCACATTTGACCCTGGTTTCATGTCCACGGCCTCTTGCGATTCGAAGATCACCTACATCGATGGTGATAATGGCATTCTGCTACACCGCGGCTACCCGATCGAACAACTGGCCGAGCAGTCCGACTACCTCGAAACCTGCTACCTGCTGCTCAACGGTGAACTGCCCACCGCCGAGCAGAAAGCCCAGTTCGTGGCCGTGGTCAAGAACCACACGATGGTTCACGAACAGCTCAAGACCTTTTTCAACGGTTTCCGCCGCGACGCCCACCCGATGGCCGTCATGTGTGGCGTAGTCGGCGCCCTGTCA…
111	CVB0007	FRA	Biofilm	KJ878300		Berge et al., 2014	TACAGTGTGGTCCGGACGTGATCGACGTACGCGGCCTGACCGCCACCGGCCGCTTCACATTTGACCCTGGTTTCATGTCCACGGCCTCTTGCGATTCGAAGATCACCTACATCGATGGTGATAATGGCATTCTGCTACACCGCGGCTACCCGATCGAACAACTGGCCGAGCAGTCCGACTACCTCGAAACCTGCTACCTGCTGCTCAACGGTGAACTGCCCACCGCCGAGCAGAAAGCCCAGTTCGTGGCCGTGGTCAAGAACCACACGATGGTTCACGAACAGCTCAAGACCTTTTTCAACGGTTTCCGCCGCGACGCCCACCCGATGGCCGTCATGTGTGGCGTAGTCGGCGCCCTGTCAGCGTTCTACCACGACTCGCTGGACATCAATAACCCGC…
111	CVB0012	FRA	Biofilm	KJ878301		Berge et al., 2014	AGGGCGCTGCCCCCGTCGAGCTGCCAATTCTGACCGGTACAGTGGGTCCGGACGTGATCGACGTACGCGGCCTGACCGCCACCGGCCGCTTCACATTTGACCCTGGTTTCATGTCCACGGCCTCTTGCGATTCGAAGATCACCTACATCGATGGTGATAATGGCATTCTGCTACACCGCGGCTACCCGATCGAACAACTGGCCGAGCAGTCCGACTACCTCGAAACCTGCTACCTGCTGCTCAACGGTGAACTGCCCACCGCCGAGCAGAAAGCCCAGTTCGTGGCCGTGGTCAAGAACCACACGATGGTTCACGAACAGCTCAAGACCTTTTTCAACGGTTTCCGCCGCGACGCCCACCCGATGGCCGTCATGTGTGGCGTAGTCGGCGCCCTGTCAG…
111	GAB0029	FRA	Biofilm	KJ878329		Berge et al., 2014	GAGGGCGCTGCCCCCGTCGAGCTGCCAATTCTGACCGGTACAGTGGGTCCGGACGTGATCGACGTACGCGGCCTGACCGCCACCGGCCGCTTCACATTTGACCCTGGTTTCATGTCCACGGCCTCTTGCGATTCGAAGATCACCTACATCGATGGTGATAATGGCATTCTGCTACACCGCGGCTACCCGATCGAACAACTGGCCGAGCAGTCCGACTACCTCGAAACCTGCTACCTGCTGCTCAACGGTGAACTGCCCACCGCCGAGCAGAAAGCCCAGTTCGTGGCCGTGGTCAAGAACCACACGATGGTTCACGAACAGCTCAAGACCTTTTTCAACGGTTTCCGCCGCGACGCCCACCCGATGGCCGTCATGTGTGGCGTAGTCGGCGCCCTGTCA…
111	GAB0032	FRA	Biofilm	KJ878330		Berge et al., 2014	GTCGAGCTGCCAATTCTGACCGGTACAGTGGGTCCGGACGTGATCGACGTACGCGGCCTGACCGCCACCGGCCGCTTCACATTTGACCCTGGTTTCATGTCCACGGCCTCTTGCGATTCGAAGATCACCTACATCGATGGTGATAATGGCATTCTGCTACACCGCGGCTACCCGATCGAACAACTGGCCGAGCAGTCCGACTACCTCGAAACCTGCTACCTGCTGCTCAACGGTGAACTGCCCACCGCCGAGCAGAAAGCCCAGTTCGTGGCCGTGGTCAAGAACCACACGATGGTTCACGAACAGCTCAAGACCTTTTTCAACGGTTTCCGCCGCGACGCCCACCCGATGGCCGTCATGTGTGGCGTAGTCGGCGCCCTGTCAGCGTTCTACCACGAC…
111	GAW0081	FRA	Irrigation_water	KJ878344		Berge et al., 2014	GGGCGCTGCCCCCGTCGAGCTGCCAATTCTGACCGGTACAGTGGGTCCGGACGTGATCGACGTACGCGGCCTGACCGCCACCGGCCGCTTCACATTTGACCCTGGTTTCATGTCCACGGCCTCTTGCGATTCGAAGATCACCTACATCGATGGTGATAATGGCATTCTGCTACACCGCGGCTACCCGATCGAACAACTGGCCGAGCAGTCCGACTACCTCGAAACCTGCTACCTGCTGCTCAACGGTGAACTGCCCACCGCCGAGCAGAAAGCCCAGTTCGTGGCCGTGGTCAAGAACCACACGATGGTTCACGAACAGCTCAAGACCTTTTTCAACGGTTTCCGCCGCGACGCCCACCCGATGGCCGTCATGTGTGGCGTAGTCGGCGCCCTGTCAGC…
111	GAW0162	FRA	Irrigation_water	KJ878355		Berge et al., 2014	GGGCGCTGCCCCCGTCGAGCTGCCAATTCTGACCGGTACAGTGGGTCCGGACGTGATCGACGTACGCGGCCTGACCGCCACCGGCCGCTTCACATTTGACCCTGGTTTCATGTCCACGGCCTCTTGCGATTCGAAGATCACCTACATCGATGGTGATAATGGCATTCTGCTACACCGCGGCTACCCGATCGAACAACTGGCCGAGCAGTCCGACTACCTCGAAACCTGCTACCTGCTGCTCAACGGTGAACTGCCCACCGCCGAGCAGAAAGCCCAGTTCGTGGCCGTGGTCAAGAACCACACGATGGTTCACGAACAGCTCAAGACCTTTTTCAACGGTTTCCGCCGCGACGCCCACCCGATGGCCGTCATGTGTGGCGTAGTCGGCGCCCTGTCAGC…
111	GAW0220	FRA	Irrigation_water	KJ878360		Berge et al., 2014	GGCGCTGCCCCCGTCGAGCTGCCAATTCTGACCGGTACAGTGGGTCCGGACGTGATCGACGTACGCGGCCTGACCGCCACCGGCCGCTTCACATTTGACCCTGGTTTCATGTCCACGGCCTCTTGCGATTCGAAGATCACCTACATCGATGGTGATAATGGCATTCTGCTACACCGCGGCTACCCGATCGAACAACTGGCCGAGCAGTCCGACTACCTCGAAACCTGCTACCTGCTGCTCAACGGTGAACTGCCCACCGCCGAGCAGAAAGCCCAGTTCGTGGCCGTGGTCAAGAACCACACGATGGTTCACGAACAGCTCAAGACCTTTTTCAACGGTTTCCGCCGCGACGCCCACCCGATGGCCGTCATGTGTGGCGTAGTCGGCGCCCTGTCAGCG…
111	LAB0127	FRA	Biofilm	KJ878395		Berge et al., 2014	GGGCGCTGCCCCCGTCGAGCTGCCAATTCTGACCGGTACAGTGGGTCCGGACGTGATCGACGTACGCGGCCTGACCGCCACCGGCCGCTTCACATTTGACCCTGGTTTCATGTCCACGGCCTCTTGCGATTCGAAGATCACCTACATCGATGGTGATAATGGCATTCTGCTACACCGCGGCTACCCGATCGAACAACTGGCCGAGCAGTCCGACTACCTCGAAACCTGCTACCTGCTGCTCAACGGTGAACTGCCCACCGCCGAGCAGAAAGCCCAGTTCGTGGCCGTGGTCAAGAACCACACGATGGTTCACGAACAGCTCAAGACCTTTTTCAACGGTTTCCGCCGCGACGCCCACCCGATGGCCGTCATGTGTGGCGTAGTCGGCGCCCTGTCAGC…
111	LNW0002	FRA	Irrigation_water	KJ878402		Berge et al., 2014	GGGCGCTGCCCCCGTCGAGCTGCCAATTCTGACCGGTACAGTGGGTCCGGACGTGATCGACGTACGCGGCCTGACCGCCACCGGCCGCTTCACATTTGACCCTGGTTTCATGTCCACGGCCTCTTGCGATTCGAAGATCACCTACATCGATGGTGATAATGGCATTCTGCTACACCGCGGCTACCCGATCGAACAACTGGCCGAGCAGTCCGACTACCTCGAAACCTGCTACCTGCTGCTCAACGGTGAACTGCCCACCGCCGAGCAGAAAGCCCAGTTCGTGGCCGTGGTCAAGAACCACACGATGGTTCACGAACAGCTCAAGACCTTTTTCAACGGTTTCCGCCGCGACGCCCACCCGATGGCCGTCATGTGTGGCGTAGTCGGCGCCCTGTCAGC…
111	SZB0073	FRA	Biofilm	KJ878479		Berge et al., 2014	AGGGCGCTGCCCCCGTCGAGCTGCCAATTCTGACCGGTACAGTGGGTCCGGACGTGATCGACGTACGCGGCCTGACCGCCACCGGCCGCTTCACATTTGACCCTGGTTTCATGTCCACGGCCTCTTGCGATTCGAAGATCACCTACATCGATGGTGATAATGGCATTCTGCTACACCGCGGCTACCCGATCGAACAACTGGCCGAGCAGTCCGACTACCTCGAAACCTGCTACCTGCTGCTCAACGGTGAACTGCCCACCGCCGAGCAGAAAGCCCAGTTCGTGGCCGTGGTCAAGAACCACACGATGGTTCACGAACAGCTCAAGACCTTTTTCAACGGTTTCCGCCGCGACGCCCACCCGATGGCCGTCATGTGTGGCGTAGTCGGCGCCCTGTCAG…
111	JFJ-0055	CHE	Snowfall	KY379265		Stopelli et al, 2017	ATGGCTGACAAAAAAGCGCAGTTGATCATCGAGGGCGCTGCCCCCGTCGAGCTGCCAATACTGACCGGTACAGTGGGTCCGGACGTGATCGACGTACGCGGTCTGACCGCCACCGGCCGCTTCACATTTGACCCTGGCTTCATGTCCACGGCCTCTTGCGAGTCGAAGATCACCTACATTGATGGTGACAACGGAATTCTGCTGCACCGCGGCTACCCGATCGAACAACTGGCCGAGCAGTCCGATTACCTCGAGACCTGCTACCTGCTGCTCAACGGCGAGCTGCCAACCGCCGAACAGAAAGCCCAGTTCGTGGCCGTGGTCAAGAACCACACGATGGTTCACGAACAACTCAAGACCTTCTTCAACGGCTTTCGCCGTGACGCCCACCCGATGGCC…
112	AI0131	NZL	Freshwater	KJ877837		Berge et al., 2014	CACCGGCCGCTTCACATTTGACCCTGGTTTCATGTCCACGGCCTCTTGCGATTCGAAGATCACCTACATCGATGGTGATAATGGCATTCTGCTACACCGCGGCTACCCGATCGAACAACTGGCCGAGCAGTCCGACTACCTCGAAACCTGCTACCTGCTGCTCAACGGTGAACTACCCACCGCCGAGCAGAAAGCCCAGTTCGTGGCCGTGGTCAAGAACCACACGATGGTTCACGAACAGCTCAAGACCTTTTTCAACGGTTTCCGCCGCGACGCCCACCCGATGGCCGTCATGTGTGGCGTAGTCGGCGCCCTGTCAGCGTTCTACCACGACTCGCTGGACATCAATAACCCGCAGCACCGCGAGATTTCCGCGGTACGCCTGATCGCCAAGATGCC…
112	CSZ0002	FRA	Snowfall	KJ878199		Berge et al., 2014	GAGGGCGCTGCCCCCGTCGAGCTGCCAATTCTGACCGGTACAGTGGGTCCGGACGTGATCGACGTACGCGGCCTGACCGCCACCGGCCGCTTCACATTTGACCCTGGTTTCATGTCCACGGCCTCTTGCGATTCGAAGATCACCTACATCGATGGTGATAATGGCATTCTGCTACACCGCGGCTACCCGATCGAACAACTGGCCGAGCAGTCCGACTACCTCGAAACCTGCTACCTGCTGCTCAACGGTGAACTACCCACCGCCGAGCAGAAAGCCCAGTTCGTGGCCGTGGTCAAGAACCACACGATGGTTCACGAACAGCTCAAGACCTTTTTCAACGGTTTCCGCCGCGACGCCCACCCGATGGCCGTCATGTGTGGCGTAGTCGGCGCCCTGTCA…
113	CCE0044	FRA	Snowpack	KJ877914		Berge et al., 2014	ATCACCATCGATTCTGTTGATCCACGAGGGCGCTGCCCCCGTCGAGCTGCCAATTCTGACCGGTACAGTGGGTCCGGACGTGATCGACGTACGCGGCCTGACCGCCACCGGCCGCTTCACATTTGACCCTGGTTTCATGTCCACGGCCTCTTGCGATTCGAAGATCACCTACATCGATGGTGATAATGGCATTCTGCTACACCGCGGCTACCCGATCGAACAACTGGCCGAGCAGTCCGACTACCTCGAAACCTGCTACCTGCTGCTCAACGGTGAACTGCCCACCGCCGAGCAGAAAGCCCAGTTCGTGGCCGTGGTCAAGAACCACACGATGGTTCACGAACAGCTCAAGACTTTTTTCAACGGTTTCCGCCGCGACGCCCACCCGATGGCCGTCAT…
113	CCE0065	FRA	Freshwater	KJ877918		Berge et al., 2014	GCCCCCGTCGAGCTGCCAATTCTGACCGGTACAGTGGGTCCGGACGTGATCGACGTACGCGGCCTGACCGCCACCGGCCGCTTCACATTTGACCCTGGTTTCATGTCCACGGCCTCTTGCGATTCGAAGATCACCTACATCGATGGTGATAATGGCATTCTGCTACACCGCGGCTACCCGATCGAACAACTGGCCGAGCAGTCCGACTACCTCGAAACCTGCTACCTGCTGCTCAACGGTGAACTGCCCACCGCCGAGCAGAAAGCCCAGTTCGTGGCCGTGGTCAAGAACCACACGATGGTTCACGAACAGCTCAAGACTTTTTTCAACGGTTTCCGCCGCGACGCCCACCCGATGGCCGTCATGTGTGGCGTAGTCGGCGCCCTGTCAGCGTTCTAC…
113	CCE0101	FRA	Snowpack	KJ877929		Berge et al., 2014	ACAGTGGGTCCGGACGTGATCGACGTACGCGGCCTGACCGCCACCGGCCGCTTCACATTTGACCCTGGTTTCATGTCCACGGCCTCTTGCGATTCGAAGATCACCTACATCGATGGTGATAATGGCATTCTGCTACACCGCGGCTACCCGATCGAACAACTGGCCGAGCAGTCCGACTACCTCGAAACCTGCTACCTGCTGCTCAACGGTGAACTGCCCACCGCCGAGCAGAAAGCCCAGTTCGTGGCCGTGGTCAAGAACCACACGATGGTTCACGAACAGCTCAAGACTTTTTTCAACGGTTTCCGCCGCGACGCCCACCCGATGGCCGTCATGTGTGGCGTAGTCGGCGCCCTGTCAGCGTTCTACCACGACTCGCTGGACATCAATAACCCGCAG…
113	CMO0047	FRA	Rain	KJ878148		Berge et al., 2014	AGGGCGCTGCCCCCGTCGAGCTGCCAATTCTGACCGGTACAGTGGGTCCGGACGTGATCGACGTACGCGGCCTGACCGCCACCGGCCGCTTCACATTTGACCCTGGTTTCATGTCCACGGCCTCTTGCGATTCGAAGATCACCTACATCGATGGTGATAATGGCATTCTGCTACACCGCGGCTACCCGATCGAACAACTGGCCGAGCAGTCCGACTACCTCGAAACCTGCTACCTGCTGCTCAACGGTGAACTGCCCACCGCCGAGCAGAAAGCCCAGTTCGTGGCCGTGGTCAAGAACCACACGATGGTTCACGAACAGCTCAAGACTTTTTTCAACGGTTTCCGCCGCGACGCCCACCCGATGGCCGTCATGTGTGGCGTAGTCGGCGCCCTGTCAG…
113	CVB0034	FRA	Biofilm	KJ878304		Berge et al., 2014	GAGGGCGCTGCCCCCGTCGAGCTGCCAATTCTGACCGGTACAGTGGGTCCGGACGTGATCGACGTACGCGGCCTGACCGCCACCGGCCGCTTCACATTTGACCCTGGTTTCATGTCCACGGCCTCTTGCGATTCGAAGATCACCTACATCGATGGTGATAATGGCATTCTGCTACACCGCGGCTACCCGATCGAACAACTGGCCGAGCAGTCCGACTACCTCGAAACCTGCTACCTGCTGCTCAACGGTGAACTGCCCACCGCCGAGCAGAAAGCCCAGTTCGTGGCCGTGGTCAAGAACCACACGATGGTTCACGAACAGCTCAAGACTTTTTTCAACGGTTTCCGCCGCGACGCCCACCCGATGGCCGTCATGTGTGGCGTAGTCGGCGCCCTGTCA…
113	CVB0037	FRA	Biofilm	KJ878305		Berge et al., 2014	AGGGCGCTGCCCCCGTCGAGCTGCCAATTCTGACCGGTACAGTGGGTCCGGACGTGATCGACGTACGCGGCCTGACCGCCACCGGCCGCTTCACATTTGACCCTGGTTTCATGTCCACGGCCTCTTGCGATTCGAAGATCACCTACATCGATGGTGATAATGGCATTCTGCTACACCGCGGCTACCCGATCGAACAACTGGCCGAGCAGTCCGACTACCTCGAAACCTGCTACCTGCTGCTCAACGGTGAACTGCCCACCGCCGAGCAGAAAGCCCAGTTCGTGGCCGTGGTCAAGAACCACACGATGGTTCACGAACAGCTCAAGACTTTTTTCAACGGTTTCCGCCGCGACGCCCACCCGATGGCCGTCATGTGTGGCGTAGTCGGCGCCCTGTCAG…
113	CVB0047	FRA	Biofilm	KJ878308		Berge et al., 2014	GAGGGCGCTGCCCCCGTCGAGCTGCCAATTCTGACCGGTACAGTGGGTCCGGACGTGATCGACGTACGCGGCCTGACCGCCACCGGCCGCTTCACATTTGACCCTGGTTTCATGTCCACGGCCTCTTGCGATTCGAAGATCACCTACATCGATGGTGATAATGGCATTCTGCTACACCGCGGCTACCCGATCGAACAACTGGCCGAGCAGTCCGACTACCTCGAAACCTGCTACCTGCTGCTCAACGGTGAACTGCCCACCGCCGAGCAGAAAGCCCAGTTCGTGGCCGTGGTCAAGAACCACACGATGGTTCACGAACAGCTCAAGACTTTTTTCAACGGTTTCCGCCGCGACGCCCACCCGATGGCCGTCATGTGTGGCGTAGTCGGCGCCCTGTCA…
113	LNW0041	FRA	Irrigation_water	KJ878413		Berge et al., 2014	GAGGGCGCTGCCCCCGTCGAGCTGCCAATTCTGACCGGTACAGTGGGTCCGGACGTGATCGACGTACGCGGCCTGACCGCCACCGGCCGCTTCACATTTGACCCTGGTTTCATGTCCACGGCCTCTTGCGATTCGAAGATCACCTACATCGATGGTGATAATGGCATTCTGCTACACCGCGGCTACCCGATCGAACAACTGGCCGAGCAGTCCGACTACCTCGAAACCTGCTACCTGCTGCTCAACGGTGAACTGCCCACCGCCGAGCAGAAAGCCCAGTTCGTGGCCGTGGTCAAGAACCACACGATGGTTCACGAACAGCTCAAGACTTTTTTCAACGGTTTCCGCCGCGACGCCCACCCGATGGCCGTCATGTGTGGCGTAGTCGGCGCCCTGTCA…
113	LYR0016	FRA	Rain	KJ878416		Berge et al., 2014	AGGGCGCTGCCCCCGTCGAGCTGCCAATTCTGACCGGTACAGTGGGTCCGGACGTGATCGACGTACGCGGCCTGACCGCCACCGGCCGCTTCACATTTGACCCTGGTTTCATGTCCACGGCCTCTTGCGATTCGAAGATCACCTACATCGATGGTGATAATGGCATTCTGCTACACCGCGGCTACCCGATCGAACAACTGGCCGAGCAGTCCGACTACCTCGAAACCTGCTACCTGCTGCTCAACGGTGAACTGCCCACCGCCGAGCAGAAAGCCCAGTTCGTGGCCGTGGTCAAGAACCACACGATGGTTCACGAACAGCTCAAGACTTTTTTCAACGGTTTCCGCCGCGACGCCCACCCGATGGCCGTCATGTGTGGCGTAGTCGGCGCCCTGTCAG…
113	PavISPave013	ITA	Plant	NZ_AKCJ00000000		Berge et al., 2014	ATGGCTGACAAAAAAGCGCAGTTGATCATCGAGGGCGCTGCCCCCGTCGAGCTGCCAATTCTGACCGGTACAGTGGGTCCGGACGTGATCGACGTACGCGGCCTGACCGCCACCGGCCGCTTCACATTTGACCCTGGTTTCATGTCCACGGCCTCTTGCGATTCGAAGATCACCTACATCGATGGTGATAATGGCATTCTGCTACACCGCGGCTACCCGATCGAACAACTGGCCGAGCAGTCCGACTACCTCGAAACCTGCTACCTGCTGCTCAACGGTGAACTGCCCACCGCCGAGCAGAAAGCCCAGTTCGTGGCCGTGGTCAAGAACCACACGATGGTTCACGAACAGCTCAAGACTTTTTTCAACGGTTTCCGCCGCGACGCCCACCCGATGGCC…
113	SZB0036	FRA	Biofilm	KJ878472		Berge et al., 2014	GAGGGCGCTGCCCCCGTCGAGCTGCCAATTCTGACCGGTACAGTGGGTCCGGACGTGATCGACGTACGCGGCCTGACCGCCACCGGCCGCTTCACATTTGACCCTGGTTTCATGTCCACGGCCTCTTGCGATTCGAAGATCACCTACATCGATGGTGATAATGGCATTCTGCTACACCGCGGCTACCCGATCGAACAACTGGCCGAGCAGTCCGACTACCTCGAAACCTGCTACCTGCTGCTCAACGGTGAACTGCCCACCGCCGAGCAGAAAGCCCAGTTCGTGGCCGTGGTCAAGAACCACACGATGGTTCACGAACAGCTCAAGACTTTTTTCAACGGTTTCCGCCGCGACGCCCACCCGATGGCCGTCATGTGTGGCGTAGTCGGCGCCCTGTCA…
113	TA0001	FRA	Freshwater	KJ878487		Berge et al., 2014	GATCGACGTACGCGGCCTGACCGCCACCGGCCGCTTCACATTTGACCCTGGTTTCATGTCCACGGCCTCTTGCGATTCGAAGATCACCTACATCGATGGTGATAATGGCATTCTGCTACACCGCGGCTACCCGATCGAACAACTGGCCGAGCAGTCCGACTACCTCGAAACCTGCTACCTGCTGCTCAACGGTGAACTGCCCACCGCCGAGCAGAAAGCCCAGTTCGTGGCCGTGGTCAAGAACCACACGATGGTTCACGAACAGCTCAAGACTTTTTTCAACGGTTTCCGCCGCGACGCCCACCCGATGGCCGTCATGTGTGGCGTAGTCGGCGCCCTGTCAGCGTTCTACCACGACTCGCTGGACATCAATAACCCGCAGCACCGCGAGATTTCCGC…
113	Vi0016	FRA	Freshwater	KJ878554		Berge et al., 2014	GTGATCGACGTACGCGGCTGACCGCCACCGGCCGCTTCACATTTGACCCTGGTTTCATGTCCACGGCCTCTTGCGATTCGAAGATCACCTACATCGATGGTGATAATGGCATTCTGCTACACCGCGGCTACCCGATCGAACAACTGGCCGAGCAGTCCGACTACCTCGAAACCTGCTACCTGCTGCTCAACGGTGAACTGCCCACCGCCGAGCAGAAAGCCCAGTTCGTGGCCGTGGTCAAGAACCACACGATGGTTCACGAACAGCTCAAGACTTTTTTCAACGGTTTCCGCCGCGACGCCCACCCGATGGCCGTCATGTGTGGCGTAGTCGGCGCCCTGTCAGCGTTCTACCACGACTCGCTGGACATCAATAACCCGCAGCACCGCGAGATTTCCG…
114	LYR0044	FRA	Rain	KJ878419		Berge et al., 2014	GAGGGCGCTGCCCCCGTCGAGCTGCCAATTCTGACCGGTACAGTGGGTCCGGACGTGATCGACGTACGCGGCCTGACCGCCACCGGCCGCTTCACATTTGACCCTGGTTTCATGTCCACGGCCTCTTGCGATTCGAAGATCACCTACATCGATGGTGATAATGGCATTCTGCTACACCGCGGCTACCCGATCGAACAACTGGCCGAGCAGTCCGACTACCTCGAGACCTGCTACCTGCTGCTCAACGGTGAACTGCCCACCGCCGAGCAGAAAGCCCAGTTCGTGGCCGTGGTCAAGAACCACACGATGGTTCACGAACAACTCAAGACCTTCTTCAACGGTTTCCGCCGTGACGCCCACCCGATGGCCGTCATGTGTGGCGTAGTCGGCGCCCTGTCG…
114	PsyCit7	USA	Plant	AEAJ00000000		Berge et al., 2014	ATGGCTGACAAAAAAGCGCAGTTGATCATCGAGGGCGCTGCCCCCGTCGAGCTGCCAATTCTGACCGGTACAGTGGGTCCGGACGTGATCGACGTACGCGGCCTGACCGCCACCGGCCGCTTCACATTTGACCCTGGTTTCATGTCCACGGCCTCTTGCGATTCGAAGATCACCTACATCGATGGTGATAATGGCATTCTGCTACACCGCGGCTACCCGATCGAACAACTGGCCGAGCAGTCCGACTACCTCGAGACCTGCTACCTGCTGCTCAACGGTGAACTGCCCACCGCCGAGCAGAAAGCCCAGTTCGTGGCCGTGGTCAAGAACCACACGATGGTTCACGAACAACTCAAGACCTTCTTCAACGGTTTCCGCCGTGACGCCCACCCGATGGCC…
114	CFBP8305	POL	Plant	LT222319		https://cirm-cfbp.fr/	ATGGCTGACAAAAAAGCGCAGTTGATCATCGAGGGCGCTGCCCCCGTCGAGCTGCCAATTCTGACCGGTACAGTGGGTCCGGACGTGATCGACGTACGCGGCCTGACCGCCACCGGCCGCTTCACATTTGACCCTGGTTTCATGTCCACGGCCTCTTGCGATTCGAAGATCACCTACATCGATGGTGATAATGGCATTCTGCTACACCGCGGCTACCCGATCGAACAACTGGCCGAGCAGTCCGACTACCTCGAGACCTGCTACCTGCTGCTCAACGGTGAACTGCCCACCGCCGAGCAGAAAGCCCAGTTCGTGGCCGTGGTCAAGAACCACACGATGGTTCACGAACAACTCAAGACCTTCTTCAACGGTTTCCGCCGTGACGCCCACCCGATGGCC…
115	CCE0236	FRA	Freshwater	KJ877963		Berge et al., 2014	GCCCCCGTCGAGCTGCCAATTCTGACCGGTACAGTGGGTCCGGACGTGATCGACGTACGCGGCCTGACCGCCACCGGCCGCTTCACATTTGACCCTGGCTTCATGTCCACGGCCTCTTGCGATTCAAAGATCACCTACATCGATGGTGATAATGGCATTCTGTTGCACCGCGGCTACCCGATCGAACAACTGGCCGAGCAGTCCGACTACCTGGAAACCTGCTACCTGCTGCTCAACGGCGAACTGCCCACCGCCGAGCAGAAAGCCCAGTTCGTGGCCGTGGTCAAGAACCACACGATGGTTCACGAACAGCTCAAGACCTTTTTCAACGGTTTCCGCCGTGACGCCCACCCGATGGCCGTCATGTGTGGTGTAGTCGGCGCCCTGTCAGCGTTCTAC…
115	CCE0593	FRA	Snowpack	KJ877984		Berge et al., 2014	TCGACGTACGCGGCCTGACCGCCACCGGCCGCTTCACATTTGACCCTGGCTTCATGTCCACGGCCTCTTGCGATTCAAAGATCACCTACATCGATGGTGATAATGGCATTCTGTTGCACCGCGGCTACCCGATCGAACAACTGGCCGAGCAGTCCGACTACCTGGAAACCTGCTACCTGCTGCTCAACGGCGAACTGCCCACCGCCGAGCAGAAAGCCCAGTTCGTGGCCGTGGTCAAGAACCACACGATGGTTCACGAACAGCTCAAGACCTTTTTCAACGGTTTCCGCCGTGACGCCCACCCGATGGCCGTCATGTGTGGTGTAGTCGGCGCCCTGTCAGCGTTCTACCACGACTCTCTGGACATCAATAACCCGCAGCACCGCGAGATTTCCGCGA…
115	USA0052	USA	Freshwater	KJ878538		Berge et al., 2014	GTGATCGACGTACGCGGCCTGACCGCCACCGGCCGCTTCACATTTGACCCTGGCTTCATGTCCACGGCCTCTTGCGATTCAAAGATCACCTACATCGATGGTGATAATGGCATTCTGTTGCACCGCGGCTACCCGATCGAACAACTGGCCGAGCAGTCCGACTACCTGGAAACCTGCTACCTGCTGCTCAACGGCGAACTGCCCACCGCCGAGCAGAAAGCCCAGTTCGTGGCCGTGGTCAAGAACCACACGATGGTTCACGAACAGCTCAAGACCTTTTTCAACGGTTTCCGCCGTGACGCCCACCCGATGGCCGTCATGTGTGGTGTAGTCGGCGCCCTGTCAGCGTTCTACCACGACTCTCTGGACATCAATAACCCGCAGCACCGCGAGATTTCC…
116	CCE0097	FRA	Snowpack	KJ877925		Berge et al., 2014	ATCACCATCGATGAAGTTGATCCACGAGGGCGCTGCCCCCGTCGAGCTGCCAATTCTGACCGGTACAGTGGGTCCGGACGTGATCGACGTACGCGGCCTGACCGCCACCGGCCGCTTCACATTTGACCCTGGCTTCATGTCCACGGCCTCTTGCGATTCGAAGATCACCTACATCGATGGTGATAATGGCATTCTGTTGCACCGCGGCTACCCGATCGAACAACTGGCCGAGCAGTCCGACTACCTGGAAACCTGCTACCTGCTGCTCAACGGCGAACTGCCCACCGCCGAGCAGAAAGCCCAGTTCGTGGCCGTGGTCAAGAACCACACGATGGTTCACGAACAGCTCAAGACCTTTTTCAACGGTTTCCGCCGTGACGCCCACCCGATGGCCGTCAT…
116	CCE0098	FRA	Snowpack	KJ877926		Berge et al., 2014	GCCATTATCACCATCGATTGTGTTGATCCCACGAGGGCGCTGCCCCCGTCGAGCTGCCAATTCTGACCGGTACAGTGGGTCCGGACGTGATCGACGTACGCGGCCTGACCGCCACCGGCCGCTTCACATTTGACCCTGGCTTCATGTCCACGGCCTCTTGCGATTCGAAGATCACCTACATCGATGGTGATAATGGCATTCTGTTGCACCGCGGCTACCCGATCGAACAACTGGCCGAGCAGTCCGACTACCTGGAAACCTGCTACCTGCTGCTCAACGGCGAACTGCCCACCGCCGAGCAGAAAGCCCAGTTCGTGGCCGTGGTCAAGAACCACACGATGGTTCACGAACAGCTCAAGACCTTTTTCAACGGTTTCCGCCGTGACGCCCACCCGATGG…
116	CCE0243	FRA	Freshwater	KJ877967		Berge et al., 2014	GCCCCCGTCGAGCTGCCAATTCTGACCGGTACAGTGGGTCCGGACGTGATCGACGTACGCGGCCTGACCGCCACCGGCCGCTTCACATTTGACCCTGGCTTCATGTCCACGGCCTCTTGCGATTCGAAGATCACCTACATCGATGGTGATAATGGCATTCTGTTGCACCGCGGCTACCCGATCGAACAACTGGCCGAGCAGTCCGACTACCTGGAAACCTGCTACCTGCTGCTCAACGGCGAACTGCCCACCGCCGAGCAGAAAGCCCAGTTCGTGGCCGTGGTCAAGAACCACACGATGGTTCACGAACAGCTCAAGACCTTTTTCAACGGTTTCCGCCGTGACGCCCACCCGATGGCCGTCATGTGTGGTGTAGTCGGCGCCCTGTCAGCGTTCTAC…
116	CCE0621	FRA	Snowpack	KJ877988		Berge et al., 2014	TACGCGGCCTGACCGCCACCGGCCGCTTCACATTTGACCCTGGCTTCATGTCCACGGCCTCTTGCGATTCGAAGATCACCTACATCGATGGTGATAATGGCATTCTGTTGCACCGCGGCTACCCGATCGAACAACTGGCCGAGCAGTCCGACTACCTGGAAACCTGCTACCTGCTGCTCAACGGCGAACTGCCCACCGCCGAGCAGAAAGCCCAGTTCGTGGCCGTGGTCAAGAACCACACGATGGTTCACGAACAGCTCAAGACCTTTTTCAACGGTTTCCGCCGTGACGCCCACCCGATGGCCGTCATGTGTGGTGTAGTCGGCGCCCTGTCAGCGTTCTACCACGACTCTCTGGACATCAATAACCCGCAGCATCGCGAGATTTCCGCGATCCGCC…
116	CCE0647	FRA	Leaf_litter	KJ877997		Berge et al., 2014	CGCGGCCTGACCGCCACCGGCCGCTTCACATTTGACCCTGGCTTCATGTCCACGGCCTCTTGCGATTCGAAGATCACCTACATCGATGGTGATAATGGCATTCTGTTGCACCGCGGCTACCCGATCGAACAACTGGCCGAGCAGTCCGACTACCTGGAAACCTGCTACCTGCTGCTCAACGGCGAACTGCCCACCGCCGAGCAGAAAGCCCAGTTCGTGGCCGTGGTCAAGAACCACACGATGGTTCACGAACAGCTCAAGACCTTTTTCAACGGTTTCCGCCGTGACGCCCACCCGATGGCCGTCATGTGTGGTGTAGTCGGCGCCCTGTCAGCGTTCTACCACGACTCTCTGGACATCAATAACCCGCAGCACCGCGAGATTTCCGCGATCCGCCTG…
116	CCE0666	FRA	Leaf_litter	KJ878003		Berge et al., 2014	CGTACGCGGCCTGACCGCCACCGGCCGCTTCACATTTGACCCTGGCTTCATGTCCACGGCCTCTTGCGATTCGAAGATCACCTACATCGATGGTGATAATGGCATTCTGTTGCACCGCGGCTACCCGATCGAACAACTGGCCGAGCAGTCCGACTACCTGGAAACCTGCTACCTGCTGCTCAACGGCGAACTGCCCACCGCCGAGCAGAAAGCCCAGTTCGTGGCCGTGGTCAAGAACCACACGATGGTTCACGAACAGCTCAAGACCTTTTTCAACGGTTTCCGCCGTGACGCCCACCCGATGGCCGTCATGTGTGGTGTAGTCGGCGCCCTGTCAGCGTTCTACCACGACTCTCTGGACATCAATAACCCGCAGCACCGCGAGATTTCCGCGATCCG…
116	CCE0766	FRA	Snowpack	KJ878018		Berge et al., 2014	GTGATCGACGTACGCGGCCTGACCGCCACCGGCCGCTTCACATTTGACCCTGGCTTCATGTCCACGGCCTCTTGCGATTCGAAGATCACCTACATCGATGGTGATAATGGCATTCTGTTGCACCGCGGCTACCCGATCGAACAACTGGCCGAGCAGTCCGACTACCTGGAAACCTGCTACCTGCTGCTCAACGGCGAACTGCCCACCGCCGAGCAGAAAGCCCAGTTCGTGGCCGTGGTCAAGAACCACACGATGGTTCACGAACAGCTCAAGACCTTTTTCAACGGTTTCCGCCGTGACGCCCACCCGATGGCCGTCATGTGTGGTGTAGTCGGCGCCCTGTCAGCGTTCTACCACGACTCTCTGGACATCAATAACCCGCAGCATCGCGAGATTTCC…
116	CCV0056	FRA	Freshwater	KJ878043		Berge et al., 2014	GCCCCCGTCGAGCTGCCAATTCTGACCGGTACAGTGGGTCCGGACGTGATCGACGTACGCGGCCTGACCGCCACCGGCCGCTTCACATTTGACCCTGGCTTCATGTCCACGGCCTCTTGCGATTCGAAGATCACCTACATCGATGGTGATAATGGCATTCTGTTGCACCGCGGCTACCCGATCGAACAACTGGCCGAGCAGTCCGACTACCTGGAAACCTGCTACCTGCTGCTCAACGGCGAACTGCCCACCGCCGAGCAGAAAGCCCAGTTCGTGGCCGTGGTCAAGAACCACACGATGGTTCACGAACAGCTCAAGACCTTTTTCAACGGTTTCCGCCGTGACGCCCACCCGATGGCCGTCATGTGTGGTGTAGTCGGCGCCCTGTCAGCGTTCTAC…
116	CCV0060	FRA	Freshwater	KJ878045		Berge et al., 2014	GCCCCCGTCGAGCTGCCAATTCTGACCGGTACAGTGGGTCCGGACGTGATCGACGTACGCGGCCTGACCGCCACCGGCCGCTTCACATTTGACCCTGGCTTCATGTCCACGGCCTCTTGCGATTCGAAGATCACCTACATCGATGGTGATAATGGCATTCTGTTGCACCGCGGCTACCCGATCGAACAACTGGCCGAGCAGTCCGACTACCTGGAAACCTGCTACCTGCTGCTCAACGGCGAACTGCCCACCGCCGAGCAGAAAGCCCAGTTCGTGGCCGTGGTCAAGAACCACACGATGGTTCACGAACAGCTCAAGACCTTTTTCAACGGTTTCCGCCGTGACGCCCACCCGATGGCCGTCATGTGTGGTGTAGTCGGCGCCCTGTCAGCGTTCTAC…
116	CCV0425	FRA	Snowfall	KJ878078		Berge et al., 2014	AGGGCGCTGCCCCCGTCGAGCTGCCAATTCTGACCGGTACAGTGGGTCCGGACGTGATCGACGTACGCGGCCTGACCGCCACCGGCCGCTTCACATTTGACCCTGGCTTCATGTCCACGGCCTCTTGCGATTCGAAGATCACCTACATCGATGGTGATAATGGCATTCTGTTGCACCGCGGCTACCCGATCGAACAACTGGCCGAGCAGTCCGACTACCTGGAAACCTGCTACCTGCTGCTCAACGGCGAACTGCCCACCGCCGAGCAGAAAGCCCAGTTCGTGGCCGTGGTCAAGAACCACACGATGGTTCACGAACAGCTCAAGACCTTTTTCAACGGTTTCCGCCGTGACGCCCACCCGATGGCCGTCATGTGTGGTGTAGTCGGCGCCCTGTCAG…
116	CSP0002	FRA	Rain	KJ878174		Berge et al., 2014	GAGGGCGCTGCCCCCGTCGAGCTGCCAATTCTGACCGGTACAGTGGGTCCGGACGTGATCGACGTACGCGGCCTGACCGCCACCGGCCGCTTCACATTTGACCCTGGCTTCATGTCCACGGCCTCTTGCGATTCGAAGATCACCTACATCGATGGTGATAATGGCATTCTGTTGCACCGCGGCTACCCGATCGAACAACTGGCCGAGCAGTCCGACTACCTGGAAACCTGCTACCTGCTGCTCAACGGCGAACTGCCCACCGCCGAGCAGAAAGCCCAGTTCGTGGCCGTGGTCAAGAACCACACGATGGTTCACGAACAGCTCAAGACCTTTTTCAACGGTTTCCGCCGTGACGCCCACCCGATGGCCGTCATGTGTGGTGTAGTCGGCGCCCTGTCA…
116	CSP0004	FRA	Rain	KJ878176		Berge et al., 2014	GAGGGCGCTGCCCCCGTCGAGCTGCCAATTCTGACCGGTACAGTGGGTCCGGACGTGATCGACGTACGCGGCCTGACCGCCACCGGCCGCTTCACATTTGACCCTGGCTTCATGTCCACGGCCTCTTGCGATTCGAAGATCACCTACATCGATGGTGATAATGGCATTCTGTTGCACCGCGGCTACCCGATCGAACAACTGGCCGAGCAGTCCGACTACCTGGAAACCTGCTACCTGCTGCTCAACGGCGAACTGCCCACCGCCGAGCAGAAAGCCCAGTTCGTGGCCGTGGTCAAGAACCACACGATGGTTCACGAACAGCTCAAGACCTTTTTCAACGGTTTCCGCCGTGACGCCCACCCGATGGCCGTCATGTGTGGTGTAGTCGGCGCCCTGTCA…
116	CSZ0864	FRA	Leaf_litter	KJ878286		Berge et al., 2014	GACGTACGCGGCCTGACCGCCACCGGCCGCTTCACATTTGACCCTGGCTTCATGTCCACGGCCTCTTGCGATTCGAAGATCACCTACATCGATGGTGATAATGGCATTCTGTTGCACCGCGGCTACCCGATCGAACAACTGGCCGAGCAGTCCGACTACCTGGAAACCTGCTACCTGCTGCTCAACGGCGAACTGCCCACCGCCGAGCAGAAAGCCCAGTTCGTGGCCGTGGTCAAGAACCACACGATGGTTCACGAACAGCTCAAGACCTTTTTCAACGGTTTCCGCCGTGACGCCCACCCGATGGCCGTCATGTGTGGTGTAGTCGGCGCCCTGTCAGCGTTCTACCACGACTCTCTGGACATCAATAACCCGCAGCATCGCGAGATTTCCGCGATC…
116	CVB0002	FRA	Biofilm	KJ878297		Berge et al., 2014	GAGGGCGCTGCCCCCGTCGAGCTGCCAATTCTGACCGGTACAGTGGGTCCGGACGTGATCGACGTACGCGGCCTGACCGCCACCGGCCGCTTCACATTTGACCCTGGCTTCATGTCCACGGCCTCTTGCGATTCGAAGATCACCTACATCGATGGTGATAATGGCATTCTGTTGCACCGCGGCTACCCGATCGAACAACTGGCCGAGCAGTCCGACTACCTGGAAACCTGCTACCTGCTGCTCAACGGCGAACTGCCCACCGCCGAGCAGAAAGCCCAGTTCGTGGCCGTGGTCAAGAACCACACGATGGTTCACGAACAGCTCAAGACCTTTTTCAACGGTTTCCGCCGTGACGCCCACCCGATGGCCGTCATGTGTGGTGTAGTCGGCGCCCTGTCA…
116	CVB0003	FRA	Biofilm	KJ878298		Berge et al., 2014	GAGGGCGCTGCCCCCGTCGAGCTGCCAATTCTGACCGGTACAGTGGGTCCGGACGTGATCGACGTACGCGGCCTGACCGCCACCGGCCGCTTCACATTTGACCCTGGCTTCATGTCCACGGCCTCTTGCGATTCGAAGATCACCTACATCGATGGTGATAATGGCATTCTGTTGCACCGCGGCTACCCGATCGAACAACTGGCCGAGCAGTCCGACTACCTGGAAACCTGCTACCTGCTGCTCAACGGCGAACTGCCCACCGCCGAGCAGAAAGCCCAGTTCGTGGCCGTGGTCAAGAACCACACGATGGTTCACGAACAGCTCAAGACCTTTTTCAACGGTTTCCGCCGTGACGCCCACCCGATGGCCGTCATGTGTGGTGTAGTCGGCGCCCTGTCA…
116	GAW0052	FRA	Irrigation_water	KJ878341		Berge et al., 2014	GGGCGCTGCCCCCGTCGAGCTGCCAATTCTGACCGGTACAGTGGGTCCGGACGTGATCGACGTACGCGGCCTGACCGCCACCGGCCGCTTCACATTTGACCCTGGCTTCATGTCCACGGCCTCTTGCGATTCGAAGATCACCTACATCGATGGTGATAATGGCATTCTGTTGCACCGCGGCTACCCGATCGAACAACTGGCCGAGCAGTCCGACTACCTGGAAACCTGCTACCTGCTGCTCAACGGCGAACTGCCCACCGCCGAGCAGAAAGCCCAGTTCGTGGCCGTGGTCAAGAACCACACGATGGTTCACGAACAGCTCAAGACCTTTTTCAACGGTTTCCGCCGTGACGCCCACCCGATGGCCGTCATGTGTGGTGTAGTCGGCGCCCTGTCAGC…
116	SZ0045	FRA	Freshwater	KJ878441		Berge et al., 2014	GATCGACGTACGCGGCCTGACCGCCACCGGCCGCTTCACATTTGACCCTGGCTTCATGTCCACGGCCTCTTGCGATTCGAAGATCACCTACATCGATGGTGATAATGGCATTCTGTTGCACCGCGGCTACCCGATCGAACAACTGGCCGAGCAGTCCGACTACCTGGAAACCTGCTACCTGCTGCTCAACGGCGAACTGCCCACCGCCGAGCAGAAAGCCCAGTTCGTGGCCGTGGTCAAGAACCACACGATGGTTCACGAACAGCTCAAGACCTTTTTCAACGGTTTCCGCCGTGACGCCCACCCGATGGCCGTCATGTGTGGTGTAGTCGGCGCCCTGTCAGCGTTCTACCACGACTCTCTGGACATCAATAACCCGCAGCATCGCGAGATTTCCGC…
116	TA0034	FRA	Plant	KJ878500		Berge et al., 2014	AGTGATCGACGTACGCGGCCTGACCGCCACCGGCCGCTTCACATTTGACCCTGGCTTCATGTCCACGGCCTCTTGCGATTCGAAGATCACCTACATCGATGGTGATAATGGCATTCTGTTGCACCGCGGCTACCCGATCGAACAACTGGCCGAGCAGTCCGACTACCTGGAAACCTGCTACCTGCTGCTCAACGGCGAACTGCCCACCGCCGAGCAGAAAGCCCAGTTCGTGGCCGTGGTCAAGAACCACACGATGGTTCACGAACAGCTCAAGACCTTTTTCAACGGTTTCCGCCGTGACGCCCACCCGATGGCCGTCATGTGTGGTGTAGTCGGCGCCCTGTCAGCGTTCTACCACGACTCTCTGGACATCAATAACCCGCAGCACCGCGAGATTTC…
116	UB0194	FRA	Freshwater	KJ878506		Berge et al., 2014	GTGATCGACGTACGCGGCCTGACCGCCACCGGCCGCTTCACATTTGACCCTGGCTTCATGTCCACGGCCTCTTGCGATTCGAAGATCACCTACATCGATGGTGATAATGGCATTCTGTTGCACCGCGGCTACCCGATCGAACAACTGGCCGAGCAGTCCGACTACCTGGAAACCTGCTACCTGCTGCTCAACGGCGAACTGCCCACCGCCGAGCAGAAAGCCCAGTTCGTGGCCGTGGTCAAGAACCACACGATGGTTCACGAACAGCTCAAGACCTTTTTCAACGGTTTCCGCCGTGACGCCCACCCGATGGCCGTCATGTGTGGTGTAGTCGGCGCCCTGTCAGCGTTCTACCACGACTCTCTGGACATCAATAACCCGCAGCACCGCGAGATTTCC…
116	UB0234	FRA	Freshwater	KJ878511		Berge et al., 2014	CGTGATCGACGTACGCGGCCTGACCGCCACCGGCCGCTTCACATTTGACCCTGGCTTCATGTCCACGGCCTCTTGCGATTCGAAGATCACCTACATCGATGGTGATAATGGCATTCTGTTGCACCGCGGCTACCCGATCGAACAACTGGCCGAGCAGTCCGACTACCTGGAAACCTGCTACCTGCTGCTCAACGGCGAACTGCCCACCGCCGAGCAGAAAGCCCAGTTCGTGGCCGTGGTCAAGAACCACACGATGGTTCACGAACAGCTCAAGACCTTTTTCAACGGTTTCCGCCGTGACGCCCACCCGATGGCCGTCATGTGTGGTGTAGTCGGCGCCCTGTCAGCGTTCTACCACGACTCTCTGGACATCAATAACCCGCAGCACCGCGAGATTTC…
116	JFJ-0047	CHE	Snowfall	KY379257		Stopelli et al, 2017	TAATCGGACTGCTCGGCCAGTTGCTCGATCGGGTAGCCGCGGTGAAGCAGGATTCCGTTATCACCATCGATGCAGTTGATCATCGAGGGCGCTGCCCCCGTCGAGCTGCCAATTCTGACGGGTACAGTGGGTCCGGACGTGATCGACGTACGCGGTCTCACCGCCACCGGCCGCTTCACATTTGACCCTGGCTTCATGTCCACGGCATCTTGCGAGTCGAAGATCACCTACATCGATGGTGATAACGGAATCCTGCTTCACCGCGGCTACCCGATCGAGCAACTGGCCGAGCAGTCCGATTATCTGGAAACCTGCTACCTGCTGCTCAATGGCGAACTGCCAACTGCCGAGCAGAAAGCCCAGTTCGTTGCCGTGGTCAAGAACCACACGATGGTTCAC…
117	CC1631	USA	Plant	KJ877904		Berge et al., 2014	GCCCCCGTCGAGCTGCCAATTCTGACCGGTACAGTGGGTCCGGACGTGATCGACGTACGCGGCCTGACCGCCACCGGCCGCTTCACATTTGACCCTGGCTTCATGTCCACGGCCTCTTGCGATTCGAAGATCACCTACATCGATGGTGACAATGGCATTCTGCTGCACCGCGGCTACCCGATCGAACAACTGGCCGAGCAGTCCGACTACCTGGAAACCTGCTACCTGCTGCTCAACGGCGAACTGCCCACCGCCGAGCAGAAAGCCCAGTTCGTGGCCGTGGTCAAGAACCACACGATGGTTCACGAACAGCTCAAGACCTTTTTCAACGGTTTCCGCCGTGACGCCCACCCGATGGCCGTCATGTGTGGTGTAGTCGGCGCCCTGTCAGCGTTCTAC…
117	CCE0027	FRA	Snowpack	KJ877913		Berge et al., 2014	GCGGCCTGACCGCCACCGGCCGCTTCACATTTGACCCTGGCTTCATGTCCACGGCCTCTTGCGATTCGAAGATCACCTACATCGATGGTGACAATGGCATTCTGCTGCACCGCGGCTACCCGATCGAACAACTGGCCGAGCAGTCCGACTACCTGGAAACCTGCTACCTGCTGCTCAACGGCGAACTGCCCACCGCCGAGCAGAAAGCCCAGTTCGTGGCCGTGGTCAAGAACCACACGATGGTTCACGAACAGCTCAAGACCTTTTTCAACGGTTTCCGCCGTGACGCCCACCCGATGGCCGTCATGTGTGGTGTAGTCGGCGCCCTGTCAGCGTTCTACCACGACTCTCTGGACATCAATAACCCGCAGCACCGCGAGATTTCCGCGGTCCGCCTGG…
117	CCV0460	FRA	Snowpack	KJ878079		Berge et al., 2014	CGACGTACGCGGCCTGACCGCCACCGGCCGCTTCACATTTGACCCTGGCTTCATGTCCACGGCCTCTTGCGATTCGAAGATCACCTACATCGATGGTGACAATGGCATTCTGCTGCACCGCGGCTACCCGATCGAACAACTGGCCGAGCAGTCCGACTACCTGGAAACCTGCTACCTGCTGCTCAACGGCGAACTGCCCACCGCCGAGCAGAAAGCCCAGTTCGTGGCCGTGGTCAAGAACCACACGATGGTTCACGAACAGCTCAAGACCTTTTTCAACGGTTTCCGCCGTGACGCCCACCCGATGGCCGTCATGTGTGGTGTAGTCGGCGCCCTGTCAGCGTTCTACCACGACTCCCTGGACATCAATAACCCGCAGCACCGCGAGATTTCCGCGGT…
117	CMW0018	FRA	Freshwater	KJ878164		Berge et al., 2014	AGGGCGCTGCCCCCGTCGAGCTGCCAATTCTGACCGGTACAGTGGGTCCGGACGTGATCGACGTACGCGGCCTGACCGCCACCGGCCGCTTCACATTTGACCCTGGCTTCATGTCCACGGCCTCTTGCGATTCGAAGATCACCTACATCGATGGTGACAATGGCATTCTGCTGCACCGCGGCTACCCGATCGAACAACTGGCCGAGCAGTCCGACTACCTGGAAACCTGCTACCTGCTGCTCAACGGCGAACTGCCCACCGCCGAGCAGAAAGCCCAGTTCGTGGCCGTGGTCAAGAACCACACGATGGTTCACGAACAGCTCAAGACCTTTTTCAACGGTTTCCGCCGTGACGCCCACCCGATGGCCGTCATGTGTGGTGTAGTCGGCGCCCTGTCAG…
117	CST0041	FRA	Rain	KJ878185		Berge et al., 2014	AGGGCGCTGCCCCCGTCGAGCTGCCAATTCTGACCGGTACAGTGGGTCCGGACGTGATCGACGTACGCGGCCTGACCGCCACCGGCCGCTTCACATTTGACCCTGGCTTCATGTCCACGGCCTCTTGCGATTCGAAGATCACCTACATCGATGGTGACAATGGCATTCTGCTGCACCGCGGCTACCCGATCGAACAACTGGCCGAGCAGTCCGACTACCTGGAAACCTGCTACCTGCTGCTCAACGGCGAACTGCCCACCGCCGAGCAGAAAGCCCAGTTCGTGGCCGTGGTCAAGAACCACACGATGGTTCACGAACAGCTCAAGACCTTTTTCAACGGTTTCCGCCGTGACGCCCACCCGATGGCCGTCATGTGTGGTGTAGTCGGCGCCCTGTCAG…
117	CST0077	FRA	Rain	KJ878189		Berge et al., 2014	AGGGCGCTGCCCCCGTCGAGCTGCCAATTCTGACCGGTACAGTGGGTCCGGACGTGATCGACGTACGCGGCCTGACCGCCACCGGCCGCTTCACATTTGACCCTGGCTTCATGTCCACGGCCTCTTGCGATTCGAAGATCACCTACATCGATGGTGACAATGGCATTCTGCTGCACCGCGGCTACCCGATCGAACAACTGGCCGAGCAGTCCGACTACCTGGAAACCTGCTACCTGCTGCTCAACGGCGAACTGCCCACCGCCGAGCAGAAAGCCCAGTTCGTGGCCGTGGTCAAGAACCACACGATGGTTCACGAACAGCTCAAGACCTTTTTCAACGGTTTCCGCCGTGACGCCCACCCGATGGCCGTCATGTGTGGTGTAGTCGGCGCCCTGTCAG…
117	CSZ0964	FRA	Freshwater	KJ878295		Berge et al., 2014	GCCCCCGTCGAGCTGCCAATTCTGACCGGTACAGTGGGTCCGGACGTGATCGACGTACGCGGCCTGACCGCCACCGGCCGCTTCACATTTGACCCTGGCTTCATGTCCACGGCCTCTTGCGATTCGAAGATCACCTACATCGATGGTGACAATGGCATTCTGCTGCACCGCGGCTACCCGATCGAACAACTGGCCGAGCAGTCCGACTACCTGGAAACCTGCTACCTGCTGCTCAACGGCGAACTGCCCACCGCCGAGCAGAAAGCCCAGTTCGTGGCCGTGGTCAAGAACCACACGATGGTTCACGAACAGCTCAAGACCTTTTTCAACGGTTTCCGCCGTGACGCCCACCCGATGGCCGTCATGTGTGGTGTAGTCGGCGCCCTGTCAGCGTTCTAC…
117	CVB0042	FRA	Biofilm	KJ878307		Berge et al., 2014	GGGGCGCTGCCCCCGTCGAGCTGCCAATTCTGACCGGTACAGTGGGTCCGGACGTGATCGACGTACGCGGCCTGACCGCCACCGGCCGCTTCACATTTGACCCTGGCTTCATGTCCACGGCCTCTTGCGATTCGAAGATCACCTACATCGATGGTGACAATGGCATTCTGCTGCACCGCGGCTACCCGATCGAACAACTGGCCGAGCAGTCCGACTACCTGGAAACCTGCTACCTGCTGCTCAACGGCGAACTGCCCACCGCCGAGCAGAAAGCCCAGTTCGTGGCCGTGGTCAAGAACCACACGATGGTTCACGAACAGCTCAAGACCTTTTTCAACGGTTTCCGCCGTGACGCCCACCCGATGGCCGTCATGTGTGGTGTAGTCGGCGCCCTGTCAG…
117	GAW0053	FRA	Irrigation_water	KJ878342		Berge et al., 2014	AGGGCGCTGCCCCCGTCGAGCTGCCAATTCTGACCGGTACAGTGGGTCCGGACGTGATCGACGTACGCGGCCTGACCGCCACCGGCCGCTTCACATTTGACCCTGGCTTCATGTCCACGGCCTCTTGCGATTCGAAGATCACCTACATCGATGGTGACAATGGCATTCTGCTGCACCGCGGCTACCCGATCGAACAACTGGCCGAGCAGTCCGACTACCTGGAAACCTGCTACCTGCTGCTCAACGGCGAACTGCCCACCGCCGAGCAGAAAGCCCAGTTCGTGGCCGTGGTCAAGAACCACACGATGGTTCACGAACAGCTCAAGACCTTTTTCAACGGTTTCCGCCGTGACGCCCACCCGATGGCCGTCATGTGTGGTGTAGTCGGCGCCCTGTCAG…
117	GAW0120	FRA	Irrigation_water	KJ878351		Berge et al., 2014	GGCGCTGCCCCCGTCGAGCTGCCAATTCTGACCGGTACAGTGGGTCCGGACGTGATCGACGTACGCGGCCTGACCGCCACCGGCCGCTTCACATTTGACCCTGGCTTCATGTCCACGGCCTCTTGCGATTCGAAGATCACCTACATCGATGGTGACAATGGCATTCTGCTGCACCGCGGCTACCCGATCGAACAACTGGCCGAGCAGTCCGACTACCTGGAAACCTGCTACCTGCTGCTCAACGGCGAACTGCCCACCGCCGAGCAGAAAGCCCAGTTCGTGGCCGTGGTCAAGAACCACACGATGGTTCACGAACAGCTCAAGACCTTTTTCAACGGTTTCCGCCGTGACGCCCACCCGATGGCCGTCATGTGTGGTGTAGTCGGCGCCCTGTCAGCG…
117	GAW0227	FRA	Irrigation_water	KJ878362		Berge et al., 2014	AGGGCGCTGCCCCCGTCGAGCTGCCAATTCTGACCGGTACAGTGGGTCCGGACGTGATCGACGTACGCGGCCTGACCGCCACCGGCCGCTTCACATTTGACCCTGGCTTCATGTCCACGGCCTCTTGCGATTCGAAGATCACCTACATCGATGGTGACAATGGCATTCTGCTGCACCGCGGCTACCCGATCGAACAACTGGCCGAGCAGTCCGACTACCTGGAAACCTGCTACCTGCTGCTCAACGGCGAACTGCCCACCGCCGAGCAGAAAGCCCAGTTCGTGGCCGTGGTCAAGAACCACACGATGGTTCACGAACAGCTCAAGACCTTTTTCAACGGTTTCCGCCGTGACGCCCACCCGATGGCCGTCATGTGTGGTGTAGTCGGCGCCCTGTCAG…
117	UB0218	FRA	Freshwater	KJ878508		Berge et al., 2014	AGTGATCGACGTACGCGGCCTGACCGCCACCGGCCGCTTCACATTTGACCCTGGCTTCATGTCCACGGCCTCTTGCGATTCGAAGATCACCTACATCGATGGTGACAATGGCATTCTGCTGCACCGCGGCTACCCGATCGAACAACTGGCCGAGCAGTCCGACTACCTGGAAACCTGCTACCTGCTGCTCAACGGCGAACTGCCCACCGCCGAGCAGAAAGCCCAGTTCGTGGCCGTGGTCAAGAACCACACGATGGTTCACGAACAGCTCAAGACCTTTTTCAACGGTTTCCGCCGTGACGCCCACCCGATGGCCGTCATGTGTGGTGTAGTCGGCGCCCTGTCAGCGTTCTACCACGACTCCCTGGACATCAATAACCCGCAGCACCGCGAGATTTC…
117	UB0222	FRA	Freshwater	KJ878509		Berge et al., 2014	AGTGATCGACGTACGCGGCCTGACCGCCACCGGCCGCTTCACATTTGACCCTGGCTTCATGTCCACGGCCTCTTGCGATTCGAAGATCACCTACATCGATGGTGACAATGGCATTCTGCTGCACCGCGGCTACCCGATCGAACAACTGGCCGAGCAGTCCGACTACCTGGAAACCTGCTACCTGCTGCTCAACGGCGAACTGCCCACCGCCGAGCAGAAAGCCCAGTTCGTGGCCGTGGTCAAGAACCACACGATGGTTCACGAACAGCTCAAGACCTTTTTCAACGGTTTCCGCCGTGACGCCCACCCGATGGCCGTCATGTGTGGTGTAGTCGGCGCCCTGTCAGCGTTCTACCACGACTCCCTGGACATCAATAACCCGCAGCACCGCGAGATTTC…
118	AI0019	NZL	Freshwater	KJ877810		Berge et al., 2014	TTTCTGACCGGTACAGTGGGTCCGGACGTGATCGACGTACGCGGCCTGACCGCCACCGGCCGCTTCACATTTGACCCTGGCTTCATGTCCACGGCCTCTTGCGATTCGAAGATCACCTACATCGATGGTGACAATGGCATTCTGCTACACCGCGGCTACCCGATCGAACAACTGGCCGAGCAGTCCGACTACCTGGAAACCTGCTACCTGCTGCTCAACGGTGAACTGCCCACCGCCGAGCAGAAAGCCCAGTTCGTTGCCGTGGTCAAGAACCACACGATGGTTCACGAACAGCTCAAGACCTTTTTCAACGGTTTCCGCCGTGACGCCCACCCGATGGCCGTCATGTGTGGTGTAGTCGGCGCCCTGTCAGCGTTCTACCACGACTCTCTGGACATC…
118	CC1502	ITA	Plant	KJ877896		Berge et al., 2014	CACCGGCCGCTTCACATTTGACCCTGGCTTCATGTCCACGGCCTCTTGCGATTCGAAGATCACCTACATCGATGGTGACAATGGCATTCTGCTACACCGCGGCTACCCGATCGAACAACTGGCCGAGCAGTCCGACTACCTGGAAACCTGCTACCTGCTGCTCAACGGTGAACTGCCCACCGCCGAGCAGAAAGCCCAGTTCGTTGCCGTGGTCAAGAACCACACGATGGTTCACGAACAGCTCAAGACCTTTTTCAACGGTTTCCGCCGTGACGCCCACCCGATGGCCGTCATGTGTGGTGTAGTCGGCGCCCTGTCAGCGTTCTACCACGACTCTCTGGACATCAATAACCCGCAGCACCGCGAGATTTCAGCGATCCGCCTGGTTGCCAAGATGCC…
118	CCE0161	FRA	Freshwater	KJ877940		Berge et al., 2014	GCCCCCGTCGAGCTGCCAATTCTGACCGGTACAGTGGGTCCGGACGTGATCGACGTACGCGGCCTGACCGCCACCGGCCGCTTCACATTTGACCCTGGCTTCATGTCCACGGCCTCTTGCGATTCGAAGATCACCTACATCGATGGTGACAATGGCATTCTGCTACACCGCGGCTACCCGATCGAACAACTGGCCGAGCAGTCCGACTACCTGGAAACCTGCTACCTGCTGCTCAACGGTGAACTGCCCACCGCCGAGCAGAAAGCCCAGTTCGTTGCCGTGGTCAAGAACCACACGATGGTTCACGAACAGCTCAAGACCTTTTTCAACGGTTTCCGCCGTGACGCCCACCCGATGGCCGTCATGTGTGGTGTAGTCGGCGCCCTGTCAGCGTTCTAC…
118	CCE0595	FRA	Snowpack	KJ877986		Berge et al., 2014	TCGACGTACGCGGCCTGACCGCCACCGGCCGCTTCACATTTGACCCTGGCTTCATGTCCACGGCCTCTTGCGATTCGAAGATCACCTACATCGATGGTGACAATGGCATTCTGCTACACCGCGGCTACCCGATCGAACAACTGGCCGAGCAGTCCGACTACCTGGAAACCTGCTACCTGCTGCTCAACGGTGAACTGCCCACCGCCGAGCAGAAAGCCCAGTTCGTTGCCGTGGTCAAGAACCACACGATGGTTCACGAACAGCTCAAGACCTTTTTCAACGGTTTCCGCCGTGACGCCCACCCGATGGCCGTCATGTGTGGTGTAGTCGGCGCCCTGTCAGCGTTCTACCACGACTCTCTGGACATCAATAACCCGCAGCACCGCGAGATTTCCGCGA…
118	CCV0568	FRA	Leaf_litter	KJ878088		Berge et al., 2014	CGGCCTGACCGCCACCGGCCGCTTCACATTTGACCCTGGCTTCATGTCCACGGCCTCTTGCGATTCGAAGATCACCTACATCGATGGTGACAATGGCATTCTGCTACACCGCGGCTACCCGATCGAACAACTGGCCGAGCAGTCCGACTACCTGGAAACCTGCTACCTGCTGCTCAACGGTGAACTGCCCACCGCCGAGCAGAAAGCCCAGTTCGTTGCCGTGGTCAAGAACCACACGATGGTTCACGAACAGCTCAAGACCTTTTTCAACGGTTTCCGCCGTGACGCCCACCCGATGGCCGTCATGTGTGGTGTAGTCGGCGCCCTGTCAGCGTTCTACCACGACTCTCTGGACATCAATAACCCGCAGCACCGCGAGATTTCCGCGATCCGCCTGGT…
118	CCV0612	FRA	Snowpack	KJ878091		Berge et al., 2014	GAGGGCGCTGCCCCCGTCGAGCTGCCAATTCTGACCGGTACAGTGGGTCCGGACGTGATCGACGTACGCGGCCTGACCGCCACCGGCCGCTTCACATTTGACCCTGGCTTCATGTCCACGGCCTCTTGCGATTCGAAGATCACCTACATCGATGGTGACAATGGCATTCTGCTACACCGCGGCTACCCGATCGAACAACTGGCCGAGCAGTCCGACTACCTGGAAACCTGCTACCTGCTGCTCAACGGTGAACTGCCCACCGCCGAGCAGAAAGCCCAGTTCGTTGCCGTGGTCAAGAACCACACGATGGTTCACGAACAGCTCAAGACCTTTTTCAACGGTTTCCGCCGTGACGCCCACCCGATGGCCGTCATGTGTGGTGTAGTCGGCGCCCTGTCA…
118	CMO0007	FRA	Rain	KJ878144		Berge et al., 2014	AGGGCGCTGCCCCCGTCGAGCTGCCAATTCTGACCGGTACAGTGGGTCCGGACGTGATCGACGTACGCGGCCTGACCGCCACCGGCCGCTTCACATTTGACCCTGGCTTCATGTCCACGGCCTCTTGCGATTCGAAGATCACCTACATCGATGGTGACAATGGCATTCTGCTACACCGCGGCTACCCGATCGAACAACTGGCCGAGCAGTCCGACTACCTGGAAACCTGCTACCTGCTGCTCAACGGTGAACTGCCCACCGCCGAGCAGAAAGCCCAGTTCGTTGCCGTGGTCAAGAACCACACGATGGTTCACGAACAGCTCAAGACCTTTTTCAACGGTTTCCGCCGTGACGCCCACCCGATGGCCGTCATGTGTGGTGTAGTCGGCGCCCTGTCAG…
118	CSZ0216	FRA	Freshwater	KJ878213		Berge et al., 2014	GCCCCCGTCGAGCTGCCAATTCTGACCGGTACAGTGGGTCCGGACGTGATCGACGTACGCGGCCTGACCGCCACCGGCCGCTTCACATTTGACCCTGGCTTCATGTCCACGGCCTCTTGCGATTCGAAGATCACCTACATCGATGGTGACAATGGCATTCTGCTACACCGCGGCTACCCGATCGAACAACTGGCCGAGCAGTCCGACTACCTGGAAACCTGCTACCTGCTGCTCAACGGTGAACTGCCCACCGCCGAGCAGAAAGCCCAGTTCGTTGCCGTGGTCAAGAACCACACGATGGTTCACGAACAGCTCAAGACCTTTTTCAACGGTTTCCGCCGTGACGCCCACCCGATGGCCGTCATGTGTGGTGTAGTCGGCGCCCTGTCAGCGTTCTAC…
118	CSZ0710	FRA	Snowpack	KJ878270		Berge et al., 2014	GAGGGCGCTGCCCCCGTCGAGCTGCCAATTCTGACCGGTACAGTGGGTCCGGACGTGATCGACGTACGCGGCCTGACCGCCACCGGCCGCTTCACATTTGACCCTGGCTTCATGTCCACGGCCTCTTGCGATTCGAAGATCACCTACATCGATGGTGACAATGGCATTCTGCTACACCGCGGCTACCCGATCGAACAACTGGCCGAGCAGTCCGACTACCTGGAAACCTGCTACCTGCTGCTCAACGGTGAACTGCCCACCGCCGAGCAGAAAGCCCAGTTCGTTGCCGTGGTCAAGAACCACACGATGGTTCACGAACAGCTCAAGACCTTTTTCAACGGTTTCCGCCGTGACGCCCACCCGATGGCCGTCATGTGTGGTGTAGTCGGCGCCCTGTCA…
118	CSZ0900	FRA	Snowpack	KJ878289		Berge et al., 2014	CGACGTACGCGGCCTGACCGCCACCGGCCGCTTCACATTTGACCCTGGCTTCATGTCCACGGCCTCTTGCGATTCGAAGATCACCTACATCGATGGTGACAATGGCATTCTGCTACACCGCGGCTACCCGATCGAACAACTGGCCGAGCAGTCCGACTACCTGGAAACCTGCTACCTGCTGCTCAACGGTGAACTGCCCACCGCCGAGCAGAAAGCCCAGTTCGTTGCCGTGGTCAAGAACCACACGATGGTTCACGAACAGCTCAAGACCTTTTTCAACGGTTTCCGCCGTGACGCCCACCCGATGGCCGTCATGTGTGGTGTAGTCGGCGCCCTGTCAGCGTTCTACCACGACTCTCTGGACATCAATAACCCGCAGCACCGCGAGATTTCCGCGAT…
118	GAW0082	FRA	Irrigation_water	KJ878345		Berge et al., 2014	GGGCGCTGCCCCCGTCGAGCTGCCAATTCTGACCGGTACAGTGGGTCCGGACGTGATCGACGTACGCGGCCTGACCGCCACCGGCCGCTTCACATTTGACCCTGGCTTCATGTCCACGGCCTCTTGCGATTCGAAGATCACCTACATCGATGGTGACAATGGCATTCTGCTACACCGCGGCTACCCGATCGAACAACTGGCCGAGCAGTCCGACTACCTGGAAACCTGCTACCTGCTGCTCAACGGTGAACTGCCCACCGCCGAGCAGAAAGCCCAGTTCGTTGCCGTGGTCAAGAACCACACGATGGTTCACGAACAGCTCAAGACCTTTTTCAACGGTTTCCGCCGTGACGCCCACCCGATGGCCGTCATGTGTGGTGTAGTCGGCGCCCTGTCAGC…
118	P7W0013	FRA	Groundwater	KJ878423		Berge et al., 2014	AGGGCGCAGCCCCCGTCGAGCTGCCAATTCTGACCGGTACAGTGGGTCCGGACGTGATCGACGTACGCGGCCTGACCGCCACCGGCCGCTTCACATTTGACCCTGGCTTCATGTCCACGGCCTCTTGCGATTCGAAGATCACCTACATCGATGGTGACAATGGCATTCTGCTACACCGCGGCTACCCGATCGAACAACTGGCCGAGCAGTCCGACTACCTGGAAACCTGCTACCTGCTGCTCAACGGTGAACTGCCCACCGCCGAGCAGAAAGCCCAGTTCGTTGCCGTGGTCAAGAACCACACGATGGTTCACGAACAGCTCAAGACCTTTTTCAACGGTTTCCGCCGTGACGCCCACCCGATGGCCGTCATGTGTGGTGTAGTCGGCGCCCTGTCAG…
118	SZ0142	FRA	Freshwater	KJ878459		Berge et al., 2014	CGTGATCGACGTACGCGGCCTTACCGCCACCGGCCGCTTCACATTTGACCCTGGCTTCATGTCCACGGCCTCTTGCGATTCGAAGATCACCTACATCGATGGTGACAATGGCATTCTGCTACACCGCGGCTACCCGATCGAACAACTGGCCGAGCAGTCCGACTACCTGGAAACCTGCTACCTGCTGCTCAACGGTGAACTGCCCACCGCCGAGCAGAAAGCCCAGTTCGTTGCCGTGGTCAAGAACCACACGATGGTTCACGAACAGCTCAAGACCTTTTTCAACGGTTTCCGCCGTGACGCCCACCCGATGGCCGTCATGTGTGGTGTAGTCGGCGCCCTGTCAGCGTTCTACCACGACTCTCTGGACATCAATAACCCGCAGCACCGCGAGATTTC…
118	UB0015	FRA	Freshwater	KJ878501		Berge et al., 2014	GGACGTGATCGACGTACGCGGCCTGACCGCCACCGGCCGCTTCACATTTGACCCTGGCTTCATGTCCACGGCCTCTTGCGATTCGAAGATCACCTACATCGATGGTGACAATGGCATTCTGCTACACCGCGGCTACCCGATCGAACAACTGGCCGAGCAGTCCGACTACCTGGAAACCTGCTACCTGCTGCTCAACGGTGAACTGCCCACCGCCGAGCAGAAAGCCCAGTTCGTTGCCGTGGTCAAGAACCACACGATGGTTCACGAACAGCTCAAGACCTTTTTCAACGGTTTCCGCCGTGACGCCCACCCGATGGCCGTCATGTGTGGTGTAGTCGGCGCCCTGTCAGCGTTCTACCACGACTCTCTGGACATCAATAACCCGCAGCACCGCGAGAT…
119	CSP0003	FRA	Rain	KJ878175		Berge et al., 2014	GAGGGCGCTGCCCCCGTCGAGCTGCCAATTCTGACCGGTACAGTGGGTCCGGACGTGATCGACGTACGCGGCCTGACCGCCACCGGCCGCTTCACATTTGACCCTGGCTTCATGTCCACGGCCTCTTGCGATTCGAAGATCACCTACATCGATGGTGACAATGGCATTCTGCTACACCGCGGCTACCCGATCGAACAACTGGCCGAGCAGTCCGACTACCTGGAAACCTGCTACCTGCTGCTCAACGGCGAACTGCCCACCGCCGAGCAGAAAGCCCAGTTCGTGGCCGTGGTCAAGAACCACACGATGGTTCACGAACAGCTCAAGACCTTTTTCAACGGTTTCCGCCGTGACGCCCACCCGATGGCCGTCATGTGTGGTGTAGTCGGCGCCCTGTCA…
119	CST0018	FRA	Rain	KJ878183		Berge et al., 2014	AGGGCGCTGCCCCCGTCGAGCTGCCAATTCTGACCGGTACAGTGGGTCCGGACGTGATCGACGTACGCGGCCTGACCGCCACCGGCCGCTTCACATTTGACCCTGGCTTCATGTCCACGGCCTCTTGCGATTCGAAGATCACCTACATCGATGGTGACAATGGCATTCTGCTACACCGCGGCTACCCGATCGAACAACTGGCCGAGCAGTCCGACTACCTGGAAACCTGCTACCTGCTGCTCAACGGCGAACTGCCCACCGCCGAGCAGAAAGCCCAGTTCGTGGCCGTGGTCAAGAACCACACGATGGTTCACGAACAGCTCAAGACCTTTTTCAACGGTTTCCGCCGTGACGCCCACCCGATGGCCGTCATGTGTGGTGTAGTCGGCGCCCTGTCAG…
119	GAW0128	FRA	Irrigation_water	KJ878352		Berge et al., 2014	GGGCGCTGCCCCCGTCGAGCTGCCAATTCTGACCGGTACAGTGGGTCCGGACGTGATCGACGTACGCGGCCTGACCGCCACCGGCCGCTTCACATTTGACCCTGGCTTCATGTCCACGGCCTCTTGCGATTCGAAGATCACCTACATCGATGGTGACAATGGCATTCTGCTACACCGCGGCTACCCGATCGAACAACTGGCCGAGCAGTCCGACTACCTGGAAACCTGCTACCTGCTGCTCAACGGCGAACTGCCCACCGCCGAGCAGAAAGCCCAGTTCGTGGCCGTGGTCAAGAACCACACGATGGTTCACGAACAGCTCAAGACCTTTTTCAACGGTTTCCGCCGTGACGCCCACCCGATGGCCGTCATGTGTGGTGTAGTCGGCGCCCTGTCAGC…
120	CCE0147	FRA	Freshwater	KJ877936		Berge et al., 2014	GCCCCCGTCGAGCTGCCAATTCTGACCGGTACAGTGGGTCCGGACGTGATCGACGTACGCGGCCTGACCGCCACCGGCCGCTTCACATTTGACCCTGGCTTCATGTCCACGGCCTCTTGCGATTCGAAGATCACCTACATCGACGGTGACAATGGCATTCTGCTACACCGCGGCTACCCGATCGAACAACTGGCCGAGCAGTCCGACTACCTGGAAACCTGCTACCTGCTGCTCAACGGTGAACTGCCCACCGCCGAGCAGAAAGCCCAGTTCGTGGCCGTGGTCAAGAACCACACGATGGTTCACGAACAGCTCAAGACCTTTTTCAACGGTTTCCGCCGTGACGCCCACCCGATGGCCGTCATGTGTGGTGTAGTCGGCGCCCTGTCAGCGTTCTAC…
120	CCE0767	FRA	Snowpack	KJ878019		Berge et al., 2014	TGATCGACGTACGCGGCCTGACCGCCACCGGCCGCTTCACATTTGACCCTGGCTTCATGTCCACGGCCTCTTGCGATTCGAAGATCACCTACATCGACGGTGACAATGGCATTCTGCTACACCGCGGCTACCCGATCGAACAACTGGCCGAGCAGTCCGACTACCTGGAAACCTGCTACCTGCTGCTCAACGGTGAACTGCCCACCGCCGAGCAGAAAGCCCAGTTCGTGGCCGTGGTCAAGAACCACACGATGGTTCACGAACAGCTCAAGACCTTTTTCAACGGTTTCCGCCGTGACGCCCACCCGATGGCCGTCATGTGTGGTGTAGTCGGCGCCCTGTCAGCGTTCTACCACGACTCTCTGGACATCAATAACCCGCAGCACCGCGAGATTTCCG…
120	CSZ0990	FRA	Freshwater	KJ878296		Berge et al., 2014	GCCCCCGTCGAGCTGCCAATTCTGACCGGTACAGTGGGTCCGGACGTGATCGACGTACGCGGCCTGACCGCCACCGGCCGCTTCACATTTGACCCTGGCTTCATGTCCACGGCCTCTTGCGATTCGAAGATCACCTACATCGACGGTGACAATGGCATTCTGCTACACCGCGGCTACCCGATCGAACAACTGGCCGAGCAGTCCGACTACCTGGAAACCTGCTACCTGCTGCTCAACGGTGAACTGCCCACCGCCGAGCAGAAAGCCCAGTTCGTGGCCGTGGTCAAGAACCACACGATGGTTCACGAACAGCTCAAGACCTTTTTCAACGGTTTCCGCCGTGACGCCCACCCGATGGCCGTCATGTGTGGTGTAGTCGGCGCCCTGTCAGCGTTCTAC…
120	LAB0071	FRA	Biofilm	KJ878386		Berge et al., 2014	GAGGGCGCTGCCCCCGTCGAGCTGCCAATTCTGACCGGTACAGTGGGTCCGGACGTGATCGACGTACGCGGCCTGACCGCCACCGGCCGCTTCACATTTGACCCTGGCTTCATGTCCACGGCCTCTTGCGATTCGAAGATCACCTACATCGACGGTGACAATGGCATTCTGCTACACCGCGGCTACCCGATCGAACAACTGGCCGAGCAGTCCGACTACCTGGAAACCTGCTACCTGCTGCTCAACGGTGAACTGCCCACCGCCGAGCAGAAAGCCCAGTTCGTGGCCGTGGTCAAGAACCACACGATGGTTCACGAACAGCTCAAGACCTTTTTCAACGGTTTCCGCCGTGACGCCCACCCGATGGCCGTCATGTGTGGTGTAGTCGGCGCCCTGTCA…
120	SZ0030	FRA	Freshwater	KJ878437		Berge et al., 2014	CGACGTACGCGGCCTGACCGCCACCGGCCGCTTCACATTTGACCCTGGCTTCATGTCCACGGCCTCTTGCGATTCGAAGATCACCTACATCGACGGTGACAATGGCATTCTGCTACACCGCGGCTACCCGATCGAACAACTGGCCGAGCAGTCCGACTACCTGGAAACCTGCTACCTGCTGCTCAACGGTGAACTGCCCACCGCCGAGCAGAAAGCCCAGTTCGTGGCCGTGGTCAAGAACCACACGATGGTTCACGAACAGCTCAAGACCTTTTTCAACGGTTTCCGCCGTGACGCCCACCCGATGGCCGTCATGTGTGGTGTAGTCGGCGCCCTGTCAGCGTTCTACCACGACTCTCTGGACATCAATAACCCGCAGCACCGCGAGATTTCCGCGAT…
120	SZ0037	FRA	Freshwater	KJ878438		Berge et al., 2014	GATCGACGTACGCGGCCTGACCGCCACCGGCCGCTTCACATTTGACCCTGGCTTCATGTCCACGGCCTCTTGCGATTCGAAGATCACCTACATCGACGGTGACAATGGCATTCTGCTACACCGCGGCTACCCGATCGAACAACTGGCCGAGCAGTCCGACTACCTGGAAACCTGCTACCTGCTGCTCAACGGTGAACTGCCCACCGCCGAGCAGAAAGCCCAGTTCGTGGCCGTGGTCAAGAACCACACGATGGTTCACGAACAGCTCAAGACCTTTTTCAACGGTTTCCGCCGTGACGCCCACCCGATGGCCGTCATGTGTGGTGTAGTCGGCGCCCTGTCAGCGTTCTACCACGACTCTCTGGACATCAATAACCCGCAGCACCGCGAGATTTCCGC…
120	SZ0051	FRA	Freshwater	KJ878444		Berge et al., 2014	GTGATCGACGTACGCGGCCTGACCGCCACCGGCCGCTTCACATTTGACCCTGGCTTCATGTCCACGGCCTCTTGCGATTCGAAGATCACCTACATCGACGGTGACAATGGCATTCTGCTACACCGCGGCTACCCGATCGAACAACTGGCCGAGCAGTCCGACTACCTGGAAACCTGCTACCTGCTGCTCAACGGTGAACTGCCCACCGCCGAGCAGAAAGCCCAGTTCGTGGCCGTGGTCAAGAACCACACGATGGTTCACGAACAGCTCAAGACCTTTTTCAACGGTTTCCGCCGTGACGCCCACCCGATGGCCGTCATGTGTGGTGTAGTCGGCGCCCTGTCAGCGTTCTACCACGACTCTCTGGACATCAATAACCCGCAGCACCGCGAGATTTCC…
120	UB0223	FRA	Freshwater	KJ878510		Berge et al., 2014	AGTGATCGACGTACGCGGCCTGACCGCCACCGGCCGCTTCACATTTGACCCTGGCTTCATGTCCACGGCCTCTTGCGATTCGAAGATCACCTACATCGACGGTGACAATGGCATTCTGCTACACCGCGGCTACCCGATCGAACAACTGGCCGAGCAGTCCGACTACCTGGAAACCTGCTACCTGCTGCTCAACGGTGAACTGCCCACCGCCGAGCAGAAAGCCCAGTTCGTGGCCGTGGTCAAGAACCACACGATGGTTCACGAACAGCTCAAGACCTTTTTCAACGGTTTCCGCCGTGACGCCCACCCGATGGCCGTCATGTGTGGTGTAGTCGGCGCCCTGTCAGCGTTCTACCACGACTCTCTGGACATCAATAACCCGCAGCACCGCGAGATTTC…
120	UB0368	FRA	Freshwater	KJ878517		Berge et al., 2014	CGTGATCGACGTACGCGGCCTGACCGCCACCGGCCGCTTCACATTTGACCCTGGCTTCATGTCCACGGCCTCTTGCGATTCGAAGATCACCTACATCGACGGTGACAATGGCATTCTGCTACACCGCGGCTACCCGATCGAACAACTGGCCGAGCAGTCCGACTACCTGGAAACCTGCTACCTGCTGCTCAACGGTGAACTGCCCACCGCCGAGCAGAAAGCCCAGTTCGTGGCCGTGGTCAAGAACCACACGATGGTTCACGAACAGCTCAAGACCTTTTTCAACGGTTTCCGCCGTGACGCCCACCCGATGGCCGTCATGTGTGGTGTAGTCGGCGCCCTGTCAGCGTTCTACCACGACTCTCTGGACATCAATAACCCGCAGCACCGCGAGATTTC…
120	UB0382	FRA	Freshwater	KJ878519		Berge et al., 2014	CGTGATCGACGTACGCGGCCTGACCGCCACCGGCCGCTTCACATTTGACCCTGGCTTCATGTCCACGGCCTCTTGCGATTCGAAGATCACCTACATCGACGGTGACAATGGCATTCTGCTACACCGCGGCTACCCGATCGAACAACTGGCCGAGCAGTCCGACTACCTGGAAACCTGCTACCTGCTGCTCAACGGTGAACTGCCCACCGCCGAGCAGAAAGCCCAGTTCGTGGCCGTGGTCAAGAACCACACGATGGTTCACGAACAGCTCAAGACCTTTTTCAACGGTTTCCGCCGTGACGCCCACCCGATGGCCGTCATGTGTGGTGTAGTCGGCGCCCTGTCAGCGTTCTACCACGACTCTCTGGACATCAATAACCCGCAGCACCGCGAGATTTC…
121	CC1503	ITA	Plant	KJ877897		Berge et al., 2014	CACCGGCCGCTTCACATTTGACCCTGGCTTCATGTCCACGGCCTCTTGCGATTCGAAGATCACCTACATCGATGGTGACAATGGCATTCTGCTACACCGCGGCTACCCGATCGAACAACTGGCCGAGCAGTCCGACTACCTGGAAACCTGCTACCTGCTGCTCAACGGTGAACTGCCCACCGCCGAGCAGAAAGCCCAGTTCGTGGCCGTGGTCAAGAACCACACGATGGTTCACGAACAGCTCAAGACCTTTTTCAACGGTTTCCGCCGTGACGCCCACCCGATGGCCGTCATGTGTGGTGTAGTCGGCGCCCTGTCAGCGTTCTACCACGACTCTCTGGACATCAATAACCCGCAGCACCGCGAGATTTCCGCGATCCGCCTGGTTGCCAAGATGCC…
121	CC1504	ITA	Plant	KJ877898		Berge et al., 2014	CGTGATCGACGTACGCGGCCTTACCGCCACCGGCCGCTTCACATTTGACCCTGGCTTCATGTCCACGGCCTCTTGCGATTCGAAGATCACCTACATCGATGGTGACAATGGCATTCTGCTACACCGCGGCTACCCGATCGAACAACTGGCCGAGCAGTCCGACTACCTGGAAACCTGCTACCTGCTGCTCAACGGTGAACTGCCCACCGCCGAGCAGAAAGCCCAGTTCGTGGCCGTGGTCAAGAACCACACGATGGTTCACGAACAGCTCAAGACCTTTTTCAACGGTTTCCGCCGTGACGCCCACCCGATGGCCGTCATGTGTGGTGTAGTCGGCGCCCTGTCAGCGTTCTACCACGACTCTCTGGACATCAATAACCCGCAGCACCGCGAGATTTC…
121	CCE0020	FRA	Snowpack	KJ877910		Berge et al., 2014	CGCGGCCTGACCGCCACCGGCCGCTTCACATTTGACCCTGGCTTCATGTCCACGGCCTCTTGCGATTCGAAGATCACCTACATCGATGGTGACAATGGCATTCTGCTACACCGCGGCTACCCGATCGAACAACTGGCCGAGCAGTCCGACTACCTGGAAACCTGCTACCTGCTGCTCAACGGTGAACTGCCCACCGCCGAGCAGAAAGCCCAGTTCGTGGCCGTGGTCAAGAACCACACGATGGTTCACGAACAGCTCAAGACCTTTTTCAACGGTTTCCGCCGTGACGCCCACCCGATGGCCGTCATGTGTGGTGTAGTCGGCGCCCTGTCAGCGTTCTACCACGACTCTCTGGACATCAATAACCCGCAGCACCGCGAGATTTCCGCGATCCGCCTG…
121	CCE0021	FRA	Snowpack	KJ877911		Berge et al., 2014	CGCGGCCTGACCGCCACCGGCCGCTTCACATTTGACCCTGGCTTCATGTCCACGGCCTCTTGCGATTCGAAGATCACCTACATCGATGGTGACAATGGCATTCTGCTACACCGCGGCTACCCGATCGAACAACTGGCCGAGCAGTCCGACTACCTGGAAACCTGCTACCTGCTGCTCAACGGTGAACTGCCCACCGCCGAGCAGAAAGCCCAGTTCGTGGCCGTGGTCAAGAACCACACGATGGTTCACGAACAGCTCAAGACCTTTTTCAACGGTTTCCGCCGTGACGCCCACCCGATGGCCGTCATGTGTGGTGTAGTCGGCGCCCTGTCAGCGTTCTACCACGACTCTCTGGACATCAATAACCCGCAGCACCGCGAGATTTCCGCGATCCGCCTG…
121	CCE0024	FRA	Snowpack	KJ877912		Berge et al., 2014	CGCGGCCTGACCGCCACCGGCCGCTTCACATTTGACCCTGGCTTCATGTCCACGGCCTCTTGCGATTCGAAGATCACCTACATCGATGGTGACAATGGCATTCTGCTACACCGCGGCTACCCGATCGAACAACTGGCCGAGCAGTCCGACTACCTGGAAACCTGCTACCTGCTGCTCAACGGTGAACTGCCCACCGCCGAGCAGAAAGCCCAGTTCGTGGCCGTGGTCAAGAACCACACGATGGTTCACGAACAGCTCAAGACCTTTTTCAACGGTTTCCGCCGTGACGCCCACCCGATGGCCGTCATGTGTGGTGTAGTCGGCGCCCTGTCAGCGTTCTACCACGACTCTCTGGACATCAATAACCCGCAGCACCGCGAGATTTCCGCGATCCGCCTG…
121	CCE0661	FRA	Leaf_litter	KJ878001		Berge et al., 2014	GGCCTGACCGCCACCGGCCGCTTCACATTTGACCCTGGCTTCATGTCCACGGCCTCTTGCGATTCGAAGATCACCTACATCGATGGTGACAATGGCATTCTGCTACACCGCGGCTACCCGATCGAACAACTGGCCGAGCAGTCCGACTACCTGGAAACCTGCTACCTGCTGCTCAACGGTGAACTGCCCACCGCCGAGCAGAAAGCCCAGTTCGTGGCCGTGGTCAAGAACCACACGATGGTTCACGAACAGCTCAAGACCTTTTTCAACGGTTTCCGCCGTGACGCCCACCCGATGGCCGTCATGTGTGGTGTAGTCGGCGCCCTGTCAGCGTTCTACCACGACTCTCTGGACATCAATAACCCGCAGCACCGCGAGATTTCCGCGATCCGCCTGGTT…
121	CCE0760	FRA	Snowpack	KJ878016		Berge et al., 2014	GAGGGCGCTGCCCCCGTCGAGCTGCCAATTCTGACCGGTACAGTGGGTCCGGACGTGATCGACGTACGCGGCCTGACCGCCACCGGCCGCTTCACATTTGACCCTGGCTTCATGTCCACGGCCTCTTGCGATTCGAAGATCACCTACATCGATGGTGACAATGGCATTCTGCTACACCGCGGCTACCCGATCGAACAACTGGCCGAGCAGTCCGACTACCTGGAAACCTGCTACCTGCTGCTCAACGGTGAACTGCCCACCGCCGAGCAGAAAGCCCAGTTCGTGGCCGTGGTCAAGAACCACACGATGGTTCACGAACAGCTCAAGACCTTTTTCAACGGTTTCCGCCGTGACGCCCACCCGATGGCCGTCATGTGTGGTGTAGTCGGCGCCCTGTCA…
121	CCV0102	FRA	Freshwater	KJ878054		Berge et al., 2014	GCCCCCGTCGAGCTGCCAATTCTGACCGGTACAGTGGGTCCGGACGTGATCGACGTACGCGGCCTTACCGCCACCGGCCGCTTCACATTTGACCCTGGCTTCATGTCCACGGCCTCTTGCGATTCGAAGATCACCTACATCGATGGTGACAATGGCATTCTGCTACACCGCGGCTACCCGATCGAACAACTGGCCGAGCAGTCCGACTACCTGGAAACCTGCTACCTGCTGCTCAACGGTGAACTGCCCACCGCCGAGCAGAAAGCCCAGTTCGTGGCCGTGGTCAAGAACCACACGATGGTTCACGAACAGCTCAAGACCTTTTTCAACGGTTTCCGCCGTGACGCCCACCCGATGGCCGTCATGTGTGGTGTAGTCGGCGCCCTGTCAGCGTTCTAC…
121	CSP0001	FRA	Rain	KJ878173		Berge et al., 2014	GAGGGCGCTGCCCCCGTCGAGCTGCCAATTCTGACCGGTACAGTGGGTCCGGACGTGATCGACGTACGCGGCCTGACCGCCACCGGCCGCTTCACATTTGACCCTGGCTTCATGTCCACGGCCTCTTGCGATTCGAAGATCACCTACATCGATGGTGACAATGGCATTCTGCTACACCGCGGCTACCCGATCGAACAACTGGCCGAGCAGTCCGACTACCTGGAAACCTGCTACCTGCTGCTCAACGGTGAACTGCCCACCGCCGAGCAGAAAGCCCAGTTCGTGGCCGTGGTCAAGAACCACACGATGGTTCACGAACAGCTCAAGACCTTTTTCAACGGTTTCCGCCGTGACGCCCACCCGATGGCCGTCATGTGTGGTGTAGTCGGCGCCCTGTCA…
121	CSP0009	FRA	Rain	KJ878178		Berge et al., 2014	AGGGCGCTGCCCCCGTCGAGCTGCCAATTCTGACCGGTACAGTGGGTCCGGACGTGATCGACGTACGCGGCCTGACCGCCACCGGCCGCTTCACATTTGACCCTGGCTTCATGTCCACGGCCTCTTGCGATTCGAAGATCACCTACATCGATGGTGACAATGGCATTCTGCTACACCGCGGCTACCCGATCGAACAACTGGCCGAGCAGTCCGACTACCTGGAAACCTGCTACCTGCTGCTCAACGGTGAACTGCCCACCGCCGAGCAGAAAGCCCAGTTCGTGGCCGTGGTCAAGAACCACACGATGGTTCACGAACAGCTCAAGACCTTTTTCAACGGTTTCCGCCGTGACGCCCACCCGATGGCCGTCATGTGTGGTGTAGTCGGCGCCCTGTCAG…
121	CSZ0729	FRA	Snowpack	KJ878276		Berge et al., 2014	CGTACGCGGCCTTACCGCCACCGGCCGCTTCACATTTGACCCTGGCTTCATGTCCACGGCCTCTTGCGATTCGAAGATCACCTACATCGATGGTGACAATGGCATTCTGCTACACCGCGGCTACCCGATCGAACAACTGGCCGAGCAGTCCGACTACCTGGAAACCTGCTACCTGCTGCTCAACGGTGAACTGCCCACCGCCGAGCAGAAAGCCCAGTTCGTGGCCGTGGTCAAGAACCACACGATGGTTCACGAACAGCTCAAGACCTTTTTCAACGGTTTCCGCCGTGACGCCCACCCGATGGCCGTCATGTGTGGTGTAGTCGGCGCCCTGTCAGCGTTCTACCACGACTCTCTGGACATCAATAACCCGCAGCACCGCGAGATTTCCGCGATCCG…
121	CVB0065	FRA	Biofilm	KJ878311		Berge et al., 2014	GGGCGCTGCCCCCGTCGAGCTGCCAATTCTGACCGGTACAGTGGGTCCGGACGTGATCGACGTACGCGGCCTGACCGCCACCGGCCGCTTCACATTTGACCCTGGCTTCATGTCCACGGCCTCTTGCGATTCGAAGATCACCTACATCGATGGTGACAATGGCATTCTGCTACACCGCGGCTACCCGATCGAACAACTGGCCGAGCAGTCCGACTACCTGGAAACCTGCTACCTGCTGCTCAACGGTGAACTGCCCACCGCCGAGCAGAAAGCCCAGTTCGTGGCCGTGGTCAAGAACCACACGATGGTTCACGAACAGCTCAAGACCTTTTTCAACGGTTTCCGCCGTGACGCCCACCCGATGGCCGTCATGTGTGGTGTAGTCGGCGCCCTGTCAGC…
121	CVB0071	FRA	Biofilm	KJ878315		Berge et al., 2014	GAGGGCGCTGCCCCCGTCGAGCTGCCAATTCTGACCGGTACAGTGGGTCCGGACGTGATCGACGTACGCGGCCTTACCGCCACCGGCCGCTTCACATTTGACCCTGGCTTCATGTCCACGGCCTCTTGCGATTCGAAGATCACCTACATCGATGGTGACAATGGCATTCTGCTACACCGCGGCTACCCGATCGAACAACTGGCCGAGCAGTCCGACTACCTGGAAACCTGCTACCTGCTGCTCAACGGTGAACTGCCCACCGCCGAGCAGAAAGCCCAGTTCGTGGCCGTGGTCAAGAACCACACGATGGTTCACGAACAGCTCAAGACCTTTTTCAACGGTTTCCGCCGTGACGCCCACCCGATGGCCGTCATGTGTGGTGTAGTCGGCGCCCTGTCA…
121	GAB0021	FRA	Biofilm	KJ878326		Berge et al., 2014	GAGGGCGCTGCCCCCGTCGAGCTGCCAATTCTGACCGGTACAGTGGGTCCGGACGTGATCGACGTACGCGGCCTGACCGCCACCGGCCGCTTCACATTTGACCCTGGCTTCATGTCCACGGCCTCTTGCGATTCGAAGATCACCTACATCGATGGTGACAATGGCATTCTGCTACACCGCGGCTACCCGATCGAACAACTGGCCGAGCAGTCCGACTACCTGGAAACCTGCTACCTGCTGCTCAACGGTGAACTGCCCACCGCCGAGCAGAAAGCCCAGTTCGTGGCCGTGGTCAAGAACCACACGATGGTTCACGAACAGCTCAAGACCTTTTTCAACGGTTTCCGCCGTGACGCCCACCCGATGGCCGTCATGTGTGGTGTAGTCGGCGCCCTGTCA…
121	GAW0205	FRA	Irrigation_water	KJ878358		Berge et al., 2014	GGGCGCTGCCCCCGTCGAGCTGCCAATTCTGACCGGTACAGTGGGTCCGGACGTGATCGACGTACGCGGCCTGACCGCCACCGGCCGCTTCACATTTGACCCTGGCTTCATGTCCACGGCCTCTTGCGATTCGAAGATCACCTACATCGATGGTGACAATGGCATTCTGCTACACCGCGGCTACCCGATCGAACAACTGGCCGAGCAGTCCGACTACCTGGAAACCTGCTACCTGCTGCTCAACGGTGAACTGCCCACCGCCGAGCAGAAAGCCCAGTTCGTGGCCGTGGTCAAGAACCACACGATGGTTCACGAACAGCTCAAGACCTTTTTCAACGGTTTCCGCCGTGACGCCCACCCGATGGCCGTCATGTGTGGTGTAGTCGGCGCCCTGTCAGC…
121	LAB0024	FRA	Biofilm	KJ878381		Berge et al., 2014	GAGGGCGCTGCCCCCGTCGAGCTGCCAATTCTGACCGGTACAGTGGGTCCGGACGTGATCGACGTACGCGGCCTTACCGCCACCGGCCGCTTCACATTTGACCCTGGCTTCATGTCCACGGCCTCTTGCGATTCGAAGATCACCTACATCGATGGTGACAATGGCATTCTGCTACACCGCGGCTACCCGATCGAACAACTGGCCGAGCAGTCCGACTACCTGGAAACCTGCTACCTGCTGCTCAACGGTGAACTGCCCACCGCCGAGCAGAAAGCCCAGTTCGTGGCCGTGGTCAAGAACCACACGATGGTTCACGAACAGCTCAAGACCTTTTTCAACGGTTTCCGCCGTGACGCCCACCCGATGGCCGTCATGTGTGGTGTAGTCGGCGCCCTGTCA…
121	SZ0093	FRA	Freshwater	KJ878448		Berge et al., 2014	GATCGACGTACGCGGCCTGACCGCCACCGGCCGCTTCACATTTGACCCTGGCTTCATGTCCACGGCCTCTTGCGATTCGAAGATCACCTACATCGATGGTGACAATGGCATTCTGCTACACCGCGGCTACCCGATCGAACAACTGGCCGAGCAGTCCGACTACCTGGAAACCTGCTACCTGCTGCTCAACGGTGAACTGCCCACCGCCGAGCAGAAAGCCCAGTTCGTGGCCGTGGTCAAGAACCACACGATGGTTCACGAACAGCTCAAGACCTTTTTCAACGGTTTCCGCCGTGACGCCCACCCGATGGCCGTCATGTGTGGTGTAGTCGGCGCCCTGTCAGCGTTCTACCACGACTCTCTGGACATCAATAACCCGCAGCACCGCGAGATTTCCGC…
121	SZ0124	FRA	Freshwater	KJ878455		Berge et al., 2014	CGTGATCGACGTACGCGGCCTGACCGCCACCGGCCGCTTCACATTTGACCCTGGCTTCATGTCCACGGCCTCTTGCGATTCGAAGATCACCTACATCGATGGTGACAATGGCATTCTGCTACACCGCGGCTACCCGATCGAACAACTGGCCGAGCAGTCCGACTACCTGGAAACCTGCTACCTGCTGCTCAACGGTGAACTGCCCACCGCCGAGCAGAAAGCCCAGTTCGTGGCCGTGGTCAAGAACCACACGATGGTTCACGAACAGCTCAAGACCTTTTTCAACGGTTTCCGCCGTGACGCCCACCCGATGGCCGTCATGTGTGGTGTAGTCGGCGCCCTGTCAGCGTTCTACCACGACTCTCTGGACATCAATAACCCGCAGCACCGCGAGATTTC…
121	UB0167	FRA	Freshwater	KJ878502		Berge et al., 2014	GTGATCGACGTACGCGGCCTTACCGCCACCGGCCGCTTCACATTTGACCCTGGCTTCATGTCCACGGCCTCTTGCGATTCGAAGATCACCTACATCGATGGTGACAATGGCATTCTGCTACACCGCGGCTACCCGATCGAACAACTGGCCGAGCAGTCCGACTACCTGGAAACCTGCTACCTGCTGCTCAACGGTGAACTGCCCACCGCCGAGCAGAAAGCCCAGTTCGTGGCCGTGGTCAAGAACCACACGATGGTTCACGAACAGCTCAAGACCTTTTTCAACGGTTTCCGCCGTGACGCCCACCCGATGGCCGTCATGTGTGGTGTAGTCGGCGCCCTGTCAGCGTTCTACCACGACTCTCTGGACATCAATAACCCGCAGCACCGCGAGATTTCC…
121	UB0186	FRA	Freshwater	KJ878504		Berge et al., 2014	CGTGATCGACGTACGCGGCCTGACCGCCACCGGCCGCTTCACATTTGACCCTGGCTTCATGTCCACGGCCTCTTGCGATTCGAAGATCACCTACATCGATGGTGACAATGGCATTCTGCTACACCGCGGCTACCCGATCGAACAACTGGCCGAGCAGTCCGACTACCTGGAAACCTGCTACCTGCTGCTCAACGGTGAACTGCCCACCGCCGAGCAGAAAGCCCAGTTCGTGGCCGTGGTCAAGAACCACACGATGGTTCACGAACAGCTCAAGACCTTTTTCAACGGTTTCCGCCGTGACGCCCACCCGATGGCCGTCATGTGTGGTGTAGTCGGCGCCCTGTCAGCGTTCTACCACGACTCTCTGGACATCAATAACCCGCAGCACCGCGAGATTTC…
121	UB0193	FRA	Freshwater	KJ878505		Berge et al., 2014	CGTGATCGACGTACGCGGCCTTACCGCCACCGGCCGCTTCACATTTGACCCTGGCTTCATGTCCACGGCCTCTTGCGATTCGAAGATCACCTACATCGATGGTGACAATGGCATTCTGCTACACCGCGGCTACCCGATCGAACAACTGGCCGAGCAGTCCGACTACCTGGAAACCTGCTACCTGCTGCTCAACGGTGAACTGCCCACCGCCGAGCAGAAAGCCCAGTTCGTGGCCGTGGTCAAGAACCACACGATGGTTCACGAACAGCTCAAGACCTTTTTCAACGGTTTCCGCCGTGACGCCCACCCGATGGCCGTCATGTGTGGTGTAGTCGGCGCCCTGTCAGCGTTCTACCACGACTCTCTGGACATCAATAACCCGCAGCACCGCGAGATTTC…
121	UB0217	FRA	Freshwater	KJ878507		Berge et al., 2014	CGTGATCGACGTACGCGGCCTTACCGCCACCGGCCGCTTCACATTTGACCCTGGCTTCATGTCCACGGCCTCTTGCGATTCGAAGATCACCTACATCGATGGTGACAATGGCATTCTGCTACACCGCGGCTACCCGATCGAACAACTGGCCGAGCAGTCCGACTACCTGGAAACCTGCTACCTGCTGCTCAACGGTGAACTGCCCACCGCCGAGCAGAAAGCCCAGTTCGTGGCCGTGGTCAAGAACCACACGATGGTTCACGAACAGCTCAAGACCTTTTTCAACGGTTTCCGCCGTGACGCCCACCCGATGGCCGTCATGTGTGGTGTAGTCGGCGCCCTGTCAGCGTTCTACCACGACTCTCTGGACATCAATAACCCGCAGCACCGCGAGATTTC…
121	UB0313	FRA	Freshwater	KJ878515		Berge et al., 2014	CGTGATCGACGTACGCGGCCTTACCGCCACCGGCCGCTTCACATTTGACCCTGGCTTCATGTCCACGGCCTCTTGCGATTCGAAGATCACCTACATCGATGGTGACAATGGCATTCTGCTACACCGCGGCTACCCGATCGAACAACTGGCCGAGCAGTCCGACTACCTGGAAACCTGCTACCTGCTGCTCAACGGTGAACTGCCCACCGCCGAGCAGAAAGCCCAGTTCGTGGCCGTGGTCAAGAACCACACGATGGTTCACGAACAGCTCAAGACCTTTTTCAACGGTTTCCGCCGTGACGCCCACCCGATGGCCGTCATGTGTGGTGTAGTCGGCGCCCTGTCAGCGTTCTACCACGACTCTCTGGACATCAATAACCCGCAGCACCGCGAGATTTC…
121	ICMP2855	BRA	Plant	LJPW00000000		https://scd.landcareresearch.co.nz/	ATGGCTGACAAAAAAGCGCAGTTGATCATCGAGGGCGCAGCCCCCGTCGAGCTGCCAATTCTGACCGGTACAGTGGGTCCGGACGTGATCGACGTACGCGGCCTGACCGCCACCGGCCGCTTCACATTTGACCCTGGCTTCATGTCCACGGCCTCTTGCGATTCGAAGATCACCTACATCGATGGTGACAATGGAATTCTGCTGCACCGCGGCTACCCGATCGAACAACTGGCCGAGCAGTCCGACTATCTCGAAACCTGCTATCTGCTGCTCAACGGCGAACTGCCCACCGCCGAACAGAAAGCCCAGTTCGTGGCCGTGGTCAAGAACCACACGATGGTTCACGAGCAACTCAAGACATTTTTCAACGGCTTTCGCCGCGACGCCCACCCGATGGCC…
122	AI0003	NZL	Freshwater	KJ877804		Berge et al., 2014	ATTCTGACCGGTACAGTGGGTCCGGACGTGATCGACGTACGCGGCCTGACCGCCACCGGCCGCTTCACATTTGACCCTGGTTTCATGTCCACGGCGTCTTGCGATTCGAAGATCACCTACATCGATGGTGACAATGGCATTCTGCTGCACCGCGGCTACCCGATCGAACAACTGGCCGAGCAGTCCGACTACCTCGAAACCTGCTACCTGCTGCTCAACGGCGAACTGCCCACCGCCGAGCAGAAAGCCCAGTTCGTGGCCGTGGTCAAGAACCACACGATGGTTCACGAACAGCTCAAGACCTTTTTCAACGGTTTCCGCCGCGACGCCCACCCGATGGCCGTCATGTGTGGCGTAGTCGGTGCCCTGTCAGCGTTCTACCACGACTCGCTGGACATC…
122	CC0094	FRA	Plant	AVEA00000000		Berge et al., 2014	ATGGCTGACAAAAAAGCGCAGTTGATCATCGAGGGCGCTGCCCCCGTCGAGCTGCCAATTCTGACCGGTACAGTGGGTCCGGACGTGATCGACGTACGCGGCCTGACCGCCACCGGCCGCTTCACATTTGACCCTGGTTTCATGTCCACGGCGTCTTGCGATTCGAAGATCACCTACATCGATGGTGACAATGGCATTCTGCTGCACCGCGGCTACCCGATCGAACAACTGGCCGAGCAGTCCGACTACCTCGAAACCTGCTACCTGCTGCTCAACGGCGAACTGCCCACCGCCGAGCAGAAAGCCCAGTTCGTGGCCGTGGTCAAGAACCACACGATGGTTCACGAACAGCTCAAGACCTTTTTCAACGGTTTCCGCCGCGACGCCCACCCGATGGCC…
122	CC0393	FRA	Irrigation_water	KJ877855		Berge et al., 2014	CGACGTACGCGGCCTGACCGCCACCGGCCGCTTCACATTTGACCCTGGTTTCATGTCCACGGCGTCTTGCGATTCGAAGATCACCTACATCGATGGTGACAATGGCATTCTGCTGCACCGCGGCTACCCGATCGAACAACTGGCCGAGCAGTCCGACTACCTCGAAACCTGCTACCTGCTGCTCAACGGCGAACTGCCCACCGCCGAGCAGAAAGCCCAGTTCGTGGCCGTGGTCAAGAACCACACGATGGTTCACGAACAGCTCAAGACCTTTTTCAACGGTTTCCGCCGCGACGCCCACCCGATGGCCGTCATGTGTGGCGTAGTCGGTGCCCTGTCAGCGTTCTACCACGACTCGCTGGACATCAATAACCCGCAGCACCGCGAGATTTCCGCGGT…
122	CC0403	FRA	Irrigation_water	KJ877856		Berge et al., 2014	GTACGCGGCCTGACCGCCACCGGCCGCTTCACATTTGACCCTGGTTTCATGTCCACGGCGTCTTGCGATTCGAAGATCACCTACATCGATGGTGACAATGGCATTCTGCTGCACCGCGGCTACCCGATCGAACAACTGGCCGAGCAGTCCGACTACCTCGAAACCTGCTACCTGCTGCTCAACGGCGAACTGCCCACCGCCGAGCAGAAAGCCCAGTTCGTGGCCGTGGTCAAGAACCACACGATGGTTCACGAACAGCTCAAGACCTTTTTCAACGGTTTCCGCCGCGACGCCCACCCGATGGCCGTCATGTGTGGCGTAGTCGGTGCCCTGTCAGCGTTCTACCACGACTCGCTGGACATCAATAACCCGCAGCACCGCGAGATTTCCGCGGTCCGC…
122	CC0406	FRA	Irrigation_water	KJ877857		Berge et al., 2014	GTACGCGGCCTGACCGCCACCGGCCGCTTCACATTTGACCCTGGTTTCATGTCCACGGCGTCTTGCGATTCGAAGATCACCTACATCGATGGTGACAATGGCATTCTGCTGCACCGCGGCTACCCGATCGAACAACTGGCCGAGCAGTCCGACTACCTCGAAACCTGCTACCTGCTGCTCAACGGCGAACTGCCCACCGCCGAGCAGAAAGCCCAGTTCGTGGCCGTGGTCAAGAACCACACGATGGTTCACGAACAGCTCAAGACCTTTTTCAACGGTTTCCGCCGCGACGCCCACCCGATGGCCGTCATGTGTGGCGTAGTCGGTGCCCTGTCAGCGTTCTACCACGACTCGCTGGACATCAATAACCCGCAGCACCGCGAGATTTCCGCGGTCCGC…
122	CC1475	FRA	Snowfall	KJ877883		Berge et al., 2014	GTACGCGGCCTGACCGCCACCGGCCGCTTCACATTTGACCCTGGTTTCATGTCCACGGCGTCTTGCGATTCGAAGATCACCTACATCGATGGTGACAATGGCATTCTGCTGCACCGCGGCTACCCGATCGAACAACTGGCCGAGCAGTCCGACTACCTCGAAACCTGCTACCTGCTGCTCAACGGCGAACTGCCCACCGCCGAGCAGAAAGCCCAGTTCGTGGCCGTGGTCAAGAACCACACGATGGTTCACGAACAGCTCAAGACCTTTTTCAACGGTTTCCGCCGCGACGCCCACCCGATGGCCGTCATGTGTGGCGTAGTCGGTGCCCTGTCAGCGTTCTACCACGACTCGCTGGACATCAATAACCCGCAGCACCGCGAGATTTCCGCGGTCCGC…
122	CC1477	FRA	Snowfall	KJ877884		Berge et al., 2014	GAGGGCGCTGCCCCCGTCGAGCTGCCAATTCTGACCGGTACAGTGGGTCCGGACGTGATCGACGTACGCGGCCTGACCGCCACCGGCCGCTTCACATTTGACCCTGGTTTCATGTCCACGGCGTCTTGCGATTCGAAGATCACCTACATCGATGGTGACAATGGCATTCTGCTGCACCGCGGCTACCCGATCGAACAACTGGCCGAGCAGTCCGACTACCTCGAAACCTGCTACCTGCTGCTCAACGGCGAACTGCCCACCGCCGAGCAGAAAGCCCAGTTCGTGGCCGTGGTCAAGAACCACACGATGGTTCACGAACAGCTCAAGACCTTTTTCAACGGTTTCCGCCGCGACGCCCACCCGATGGCCGTCATGTGTGGCGTAGTCGGTGCCCTGTCA…
122	CC1497	FRA	Snowfall	KJ877893		Berge et al., 2014	GTACGCGGCCTGACCGCCACCGGCCGCTTCACATTTGACCCTGGTTTCATGTCCACGGCGTCTTGCGATTCGAAGATCACCTACATCGATGGTGACAATGGCATTCTGCTGCACCGCGGCTACCCGATCGAACAACTGGCCGAGCAGTCCGACTACCTCGAAACCTGCTACCTGCTGCTCAACGGCGAACTGCCCACCGCCGAGCAGAAAGCCCAGTTCGTGGCCGTGGTCAAGAACCACACGATGGTTCACGAACAGCTCAAGACCTTTTTCAACGGTTTCCGCCGCGACGCCCACCCGATGGCCGTCATGTGTGGCGTAGTCGGTGCCCTGTCAGCGTTCTACCACGACTCGCTGGACATCAATAACCCGCAGCACCGCGAGATTTCCGCGGTCCGC…
122	CC1498	FRA	Snowfall	KJ877894		Berge et al., 2014	GTACGCGGCCTGACCGCCACCGGCCGCTTCACATTTGACCCTGGTTTCATGTCCACGGCGTCTTGCGATTCGAAGATCACCTACATCGATGGTGACAATGGCATTCTGCTGCACCGCGGCTACCCGATCGAACAACTGGCCGAGCAGTCCGACTACCTCGAAACCTGCTACCTGCTGCTCAACGGCGAACTGCCCACCGCCGAGCAGAAAGCCCAGTTCGTGGCCGTGGTCAAGAACCACACGATGGTTCACGAACAGCTCAAGACCTTTTTCAACGGTTTCCGCCGCGACGCCCACCCGATGGCCGTCATGTGTGGCGTAGTCGGTGCCCTGTCAGCGTTCTACCACGACTCGCTGGACATCAATAACCCGCAGCACCGCGAGATTTCCGCGGTCCGC…
122	CC1499	FRA	Rain	KJ877895		Berge et al., 2014	GTACGCGGCCTGACCGCCACCGGCCGCTTCACATTTGACCCTGGTTTCATGTCCACGGCGTCTTGCGATTCGAAGATCACCTACATCGATGGTGACAATGGCATTCTGCTGCACCGCGGCTACCCGATCGAACAACTGGCCGAGCAGTCCGACTACCTCGAAACCTGCTACCTGCTGCTCAACGGCGAACTGCCCACCGCCGAGCAGAAAGCCCAGTTCGTGGCCGTGGTCAAGAACCACACGATGGTTCACGAACAGCTCAAGACCTTTTTCAACGGTTTCCGCCGCGACGCCCACCCGATGGCCGTCATGTGTGGCGTAGTCGGTGCCCTGTCAGCGTTCTACCACGACTCGCTGGACATCAATAACCCGCAGCACCGCGAGATTTCCGCGGTCCGC…
122	CCE0290	FRA	Freshwater	KJ877974		Berge et al., 2014	GCCCCCGTCGAGCTGCCAATTCTGACCGGTACAGTGGGTCCGGACGTGATCGACGTACGCGGCCTGACCGCCACCGGCCGCTTCACATTTGACCCTGGTTTCATGTCCACGGCGTCTTGCGATTCGAAGATCACCTACATCGATGGTGACAATGGCATTCTGCTGCACCGCGGCTACCCGATCGAACAACTGGCCGAGCAGTCCGACTACCTCGAAACCTGCTACCTGCTGCTCAACGGCGAACTGCCCACCGCCGAGCAGAAAGCCCAGTTCGTGGCCGTGGTCAAGAACCACACGATGGTTCACGAACAGCTCAAGACCTTTTTCAACGGTTTCCGCCGCGACGCCCACCCGATGGCCGTCATGTGTGGCGTAGTCGGTGCCCTGTCAGCGTTCTAC…
122	CSZ0417	FRA	Freshwater	KJ878266		Berge et al., 2014	GCCCCCGTCGAGCTGCCAATTCTGACCGGTACAGTGGGTCCGGACGTGATCGACGTACGCGGCCTGACCGCCACCGGCCGCTTCACATTTGACCCTGGTTTCATGTCCACGGCGTCTTGCGATTCGAAGATCACCTACATCGATGGTGACAATGGCATTCTGCTGCACCGCGGCTACCCGATCGAACAACTGGCCGAGCAGTCCGACTACCTCGAAACCTGCTACCTGCTGCTCAACGGCGAACTGCCCACCGCCGAGCAGAAAGCCCAGTTCGTGGCCGTGGTCAAGAACCACACGATGGTTCACGAACAGCTCAAGACCTTTTTCAACGGTTTCCGCCGCGACGCCCACCCGATGGCCGTCATGTGTGGCGTAGTCGGTGCCCTGTCAGCGTTCTAC…
122	GAB0050	FRA	Biofilm	KJ878332		Berge et al., 2014	GAGGGCGCTGCCCCCGTCGAGCTGCCAATTCTGACCGGTACAGTGGGTCCGGACGTGATCGACGTACGCGGCCTGACCGCCACCGGCCGCTTCACATTTGACCCTGGTTTCATGTCCACGGCGTCTTGCGATTCGAAGATCACCTACATCGATGGTGACAATGGCATTCTGCTGCACCGCGGCTACCCGATCGAACAACTGGCCGAGCAGTCCGACTACCTCGAAACCTGCTACCTGCTGCTCAACGGCGAACTGCCCACCGCCGAGCAGAAAGCCCAGTTCGTGGCCGTGGTCAAGAACCACACGATGGTTCACGAACAGCTCAAGACCTTTTTCAACGGTTTCCGCCGCGACGCCCACCCGATGGCCGTCATGTGTGGCGTAGTCGGTGCCCTGTCA…
122	GAW0023	FRA	Irrigation_water	KJ878335		Berge et al., 2014	GAGGGCGCTGCCCCCGTCGAGCTGCCAATTCTGACCGGTACAGTGGGTCCGGACGTGATCGACGTACGCGGCCTGACCGCCACCGGCCGCTTCACATTTGACCCTGGTTTCATGTCCACGGCGTCTTGCGATTCGAAGATCACCTACATCGATGGTGACAATGGCATTCTGCTGCACCGCGGCTACCCGATCGAACAACTGGCCGAGCAGTCCGACTACCTCGAAACCTGCTACCTGCTGCTCAACGGCGAACTGCCCACCGCCGAGCAGAAAGCCCAGTTCGTGGCCGTGGTCAAGAACCACACGATGGTTCACGAACAGCTCAAGACCTTTTTCAACGGTTTCCGCCGCGACGCCCACCCGATGGCCGTCATGTGTGGCGTAGTCGGTGCCCTGTCA…
122	GAW0226	FRA	Irrigation_water	KJ878361		Berge et al., 2014	GAGGGCGCTGCCCCCGTCGAGCTGCCAATTCTGACCGGTACAGTGGGTCCGGACGTGATCGACGTACGCGGCCTGACCGCCACCGGCCGCTTCACATTTGACCCTGGTTTCATGTCCACGGCGTCTTGCGATTCGAAGATCACCTACATCGATGGTGACAATGGCATTCTGCTGCACCGCGGCTACCCGATCGAACAACTGGCCGAGCAGTCCGACTACCTCGAAACCTGCTACCTGCTGCTCAACGGCGAACTGCCCACCGCCGAGCAGAAAGCCCAGTTCGTGGCCGTGGTCAAGAACCACACGATGGTTCACGAACAGCTCAAGACCTTTTTCAACGGTTTCCGCCGCGACGCCCACCCGATGGCCGTCATGTGTGGCGTAGTCGGTGCCCTGTCA…
122	JAW0012	FRA	Groundwater	KJ878369		Berge et al., 2014	GGGCGCTGCCCCCGTCGAGCTGCCAATTCTGACCGGTACAGTGGGTCCGGACGTGATCGACGTACGCGGCCTGACCGCCACCGGCCGCTTCACATTTGACCCTGGTTTCATGTCCACGGCGTCTTGCGATTCGAAGATCACCTACATCGATGGTGACAATGGCATTCTGCTGCACCGCGGCTACCCGATCGAACAACTGGCCGAGCAGTCCGACTACCTCGAAACCTGCTACCTGCTGCTCAACGGCGAACTGCCCACCGCCGAGCAGAAAGCCCAGTTCGTGGCCGTGGTCAAGAACCACACGATGGTTCACGAACAGCTCAAGACCTTTTTCAACGGTTTCCGCCGCGACGCCCACCCGATGGCCGTCATGTGTGGCGTAGTCGGTGCCCTGTCAGC…
122	T3W0014	FRA	Groundwater	KJ878484		Berge et al., 2014	GAGGGCGCTGCCCCCGTCGAGCTGCCAATTCTGACCGGTACAGTGGGTCCGGACGTGATCGACGTACGCGGCCTGACCGCCACCGGCCGCTTCACATTTGACCCTGGTTTCATGTCCACGGCGTCTTGCGATTCGAAGATCACCTACATCGATGGTGACAATGGCATTCTGCTGCACCGCGGCTACCCGATCGAACAACTGGCCGAGCAGTCCGACTACCTCGAAACCTGCTACCTGCTGCTCAACGGCGAACTGCCCACCGCCGAGCAGAAAGCCCAGTTCGTGGCCGTGGTCAAGAACCACACGATGGTTCACGAACAGCTCAAGACCTTTTTCAACGGTTTCCGCCGCGACGCCCACCCGATGGCCGTCATGTGTGGCGTAGTCGGTGCCCTGTCA…
122	UB0398	FRA	Freshwater	KJ878520		Berge et al., 2014	ATCGACGTACGCGGCCTGACCGCCACCGGCCGCTTCACATTTGACCCTGGTTTCATGTCCACGGCGTCTTGCGATTCGAAGATCACCTACATCGATGGTGACAATGGCATTCTGCTGCACCGCGGCTACCCGATCGAACAACTGGCCGAGCAGTCCGACTACCTCGAAACCTGCTACCTGCTGCTCAACGGCGAACTGCCCACCGCCGAGCAGAAAGCCCAGTTCGTGGCCGTGGTCAAGAACCACACGATGGTTCACGAACAGCTCAAGACCTTTTTCAACGGTTTCCGCCGCGACGCCCACCCGATGGCCGTCATGTGTGGCGTAGTCGGTGCCCTGTCAGCGTTCTACCACGACTCGCTGGACATCAATAACCCGCAGCACCGCGAGATTTCCGCG…
122	Vi0019	FRA	Freshwater	KJ878556		Berge et al., 2014	GTGATCGACGTACGCGGCCTGACCGCCACCGGCCGCTTCACATTTGACCCTGGTTTCATGTCCACGGCGTCTTGCGATTCGAAGATCACCTACATCGATGGTGACAATGGCATTCTGCTGCACCGCGGCTACCCGATCGAACAACTGGCCGAGCAGTCCGACTACCTCGAAACCTGCTACCTGCTGCTCAACGGCGAACTGCCCACCGCCGAGCAGAAAGCCCAGTTCGTGGCCGTGGTCAAGAACCACACGATGGTTCACGAACAGCTCAAGACCTTTTTCAACGGTTTCCGCCGCGACGCCCACCCGATGGCCGTCATGTGTGGCGTAGTCGGTGCCCTGTCAGCGTTCTACCACGACTCGCTGGACATCAATAACCCGCAGCACCGCGAGATTTCC…
123	USA0009	USA	Freshwater	KJ878529		Berge et al., 2014	GTTGATCATCGAGGGCGCTGCCCCCGTCGAGCTGCCAATTCTGACCGGTACAGTGGGTCCGGACGTGATCGACGTACGCGGCCTGACCGCCACCGGCCGCTTCACATTTGACCCTGGTTTCATGTCCACGGCGTCTTGCGATTCGAAGATCACCTACATCGATGGTGACAATGGCATTCTGCTGCACCGCGGCTACCCGATCGAACAACTGGCCGAGCAGTCCGACTACCTCGAAACCTGCTACCTGCTGCTCAACGGCGAACTGCCCACCGCCGAGCAGAAAGCCCAGTTCGTGGCCGTGGTCAAGAACCACACGATGGTTCACGAACAGCTCAAGACCTTTTTCAACGGTTTCCGCCGCGACGCCCACCCGATGGCCGTCATGTGTGGCGTGGTCGG…
123	USA0011	USA	Freshwater	AVDX00000000		Berge et al., 2014	ATGGCTGACAAAAAAGCGCAGTTGATCATCGAGGGCGCTGCCCCCGTCGAGCTGCCAATTCTGACCGGTACAGTGGGTCCGGACGTGATCGACGTACGCGGCCTGACCGCCACCGGCCGCTTCACATTTGACCCTGGTTTCATGTCCACGGCGTCTTGCGATTCGAAGATCACCTACATCGATGGTGACAATGGCATTCTGCTGCACCGCGGCTACCCGATCGAACAACTGGCCGAGCAGTCCGACTACCTCGAAACCTGCTACCTGCTGCTCAACGGCGAACTGCCCACCGCCGAGCAGAAAGCCCAGTTCGTGGCCGTGGTCAAGAACCACACGATGGTTCACGAACAGCTCAAGACCTTTTTCAACGGTTTCCGCCGCGACGCCCACCCGATGGCC…
124	CC1435	FRA	Biofilm	KJ877876		Berge et al., 2014	GTACGCGGCCTGACCGCCACCGGCCGCTTCACATTTGACCCTGGTTTCATGTCCACGGCGTCTTGCGATTCGAAGATCACCTACATCGATGGTGACAATGGCATTCTGCTGCACCGCGGCTACCCGATCGAACAACTGGCCGAGCAGTCCGACTACCTCGAAACCTGCTACCTGCTGCTCAACGGCGAACTGCCCACCGCCGAGCAGAAAGCCCAGTTCGTGGCCGTGGTCAAGAACCACACGATGGTTCACGAGCAACTCAAGACCTTTTTCAACGGTTTCCGTCGCGACGCCCACCCGATGGCCGTCATGTGTGGCGTAGTCGGCGCCCTGTCAGCGTTCTATCACGACTCGCTGGACATCAATAACCCGCAGCACCGCGAGATTTCCGCGGTCCGC…
124	CMO0070	FRA	Rain	KJ878150		Berge et al., 2014	AGGGCGCTGCCCCCGTCGAGCTGCCAATTCTGACCGGTACAGTGGGTCCGGACGTGATCGACGTACGCGGCCTGACCGCCACCGGCCGCTTCACATTTGACCCTGGTTTCATGTCCACGGCGTCTTGCGATTCGAAGATCACCTACATCGATGGTGACAATGGCATTCTGCTGCACCGCGGCTACCCGATCGAACAACTGGCCGAGCAGTCCGACTACCTCGAAACCTGCTACCTGCTGCTCAACGGCGAACTGCCCACCGCCGAGCAGAAAGCCCAGTTCGTGGCCGTGGTCAAGAACCACACGATGGTTCACGAGCAACTCAAGACCTTTTTCAACGGTTTCCGTCGCGACGCCCACCCGATGGCCGTCATGTGTGGCGTAGTCGGCGCCCTGTCAG…
124	CMW0026	FRA	Freshwater	KJ878167		Berge et al., 2014	GAGGGCGCTGCCCCCGTCGAGCTGCCAATTCTGACCGGTACAGTGGGTCCGGACGTGATCGACGTACGCGGCCTGACCGCCACCGGCCGCTTCACATTTGACCCTGGTTTCATGTCCACGGCGTCTTGCGATTCGAAGATCACCTACATCGATGGTGACAATGGCATTCTGCTGCACCGCGGCTACCCGATCGAACAACTGGCCGAGCAGTCCGACTACCTCGAAACCTGCTACCTGCTGCTCAACGGCGAACTGCCCACCGCCGAGCAGAAAGCCCAGTTCGTGGCCGTGGTCAAGAACCACACGATGGTTCACGAGCAACTCAAGACCTTTTTCAACGGTTTCCGTCGCGACGCCCACCCGATGGCCGTCATGTGTGGCGTAGTCGGCGCCCTGTCA…
124	CST0075	FRA	Rain	KJ878188		Berge et al., 2014	AGGGCGCAGCCCCCGTCGAGCTGCCAATTCTGACCGGTACAGTGGGTCCGGACGTGATCGACGTACGCGGCCTGACCGCCACCGGCCGCTTCACATTTGACCCTGGTTTCATGTCCACGGCGTCTTGCGATTCGAAGATCACCTACATCGATGGTGACAATGGCATTCTGCTGCACCGCGGCTACCCGATCGAACAACTGGCCGAGCAGTCCGACTACCTCGAAACCTGCTACCTGCTGCTCAACGGCGAACTGCCCACCGCCGAGCAGAAAGCCCAGTTCGTGGCCGTGGTCAAGAACCACACGATGGTTCACGAGCAACTCAAGACCTTTTTCAACGGTTTCCGTCGCGACGCCCACCCGATGGCCGTCATGTGTGGCGTAGTCGGCGCCCTGTCAG…
124	GAB0042	FRA	Biofilm	KJ878331		Berge et al., 2014	GAGGGCGCTGCCCCCGTCGAGCTGCCAATTCTGACCGGTACAGTGGGTCCGGACGTGATCGACGTACGCGGCCTGACCGCCACCGGCCGCTTCACATTTGACCCTGGTTTCATGTCCACGGCGTCTTGCGATTCGAAGATCACCTACATCGATGGTGACAATGGCATTCTGCTGCACCGCGGCTACCCGATCGAACAACTGGCCGAGCAGTCCGACTACCTCGAAACCTGCTACCTGCTGCTCAACGGCGAACTGCCCACCGCCGAGCAGAAAGCCCAGTTCGTGGCCGTGGTCAAGAACCACACGATGGTTCACGAGCAACTCAAGACCTTTTTCAACGGTTTCCGTCGCGACGCCCACCCGATGGCCGTCATGTGTGGCGTAGTCGGCGCCCTGTCA…
124	GAW0031	FRA	Irrigation_water	KJ878337		Berge et al., 2014	AGGGCGCTGCCCCCGTCGAGCTGCCAATTCTGACCGGTACAGTGGGTCCGGACGTGATCGACGTACGCGGCCTGACCGCCACCGGCCGCTTCACATTTGACCCTGGTTTCATGTCCACGGCGTCTTGCGATTCGAAGATCACCTACATCGATGGTGACAATGGCATTCTGCTGCACCGCGGCTACCCGATCGAACAACTGGCCGAGCAGTCCGACTACCTCGAAACCTGCTACCTGCTGCTCAACGGCGAACTGCCCACCGCCGAGCAGAAAGCCCAGTTCGTGGCCGTGGTCAAGAACCACACGATGGTTCACGAGCAACTCAAGACCTTTTTCAACGGTTTCCGTCGCGACGCCCACCCGATGGCCGTCATGTGTGGCGTAGTCGGCGCCCTGTCAG…
124	GAW0089	FRA	Irrigation_water	KJ878346		Berge et al., 2014	GGGCGCTGCCCCCGTCGAGCTGCCAATTCTGACCGGTACAGTGGGTCCGGACGTGATCGACGTACGCGGCCTGACCGCCACCGGCCGCTTCACATTTGACCCTGGTTTCATGTCCACGGCGTCTTGCGATTCGAAGATCACCTACATCGATGGTGACAATGGCATTCTGCTGCACCGCGGCTACCCGATCGAACAACTGGCCGAGCAGTCCGACTACCTCGAAACCTGCTACCTGCTGCTCAACGGCGAACTGCCCACCGCCGAGCAGAAAGCCCAGTTCGTGGCCGTGGTCAAGAACCACACGATGGTTCACGAGCAACTCAAGACCTTTTTCAACGGTTTCCGTCGCGACGCCCACCCGATGGCCGTCATGTGTGGCGTAGTCGGCGCCCTGTCAGC…
124	MAFF302273PT	?	Plant	AEAO00000000		Berge et al., 2014	ATGGCTGACAAAAAAGCGCAGTTGATCATCGAGGGCGCTGCCCCCGTCGAGCTGCCAATTCTGACCGGTACAGTGGGTCCGGACGTGATCGACGTACGCGGCCTGACCGCCACCGGCCGCTTCACATTTGACCCTGGTTTCATGTCCACGGCGTCTTGCGATTCGAAGATCACCTACATCGATGGTGACAATGGCATTCTGCTGCACCGCGGCTACCCGATCGAACAACTGGCCGAGCAGTCCGACTACCTCGAAACCTGCTACCTGCTGCTCAACGGCGAACTGCCCACCGCCGAGCAGAAAGCCCAGTTCGTGGCCGTGGTCAAGAACCACACGATGGTTCACGAGCAACTCAAGACCTTTTTCAACGGTTTCCGTCGCGACGCCCACCCGATGGCC…
124	SZB0060	FRA	Biofilm	KJ878473		Berge et al., 2014	GAGGGCGCTGCCCCCGTCGAGCTGCCAATTCTGACCGGTACAGTGGGTCCGGACGTGATCGACGTACGCGGCCTGACCGCCACCGGCCGCTTCACATTTGACCCTGGTTTCATGTCCACGGCGTCTTGCGATTCGAAGATCACCTACATCGATGGTGACAATGGCATTCTGCTGCACCGCGGCTACCCGATCGAACAACTGGCCGAGCAGTCCGACTACCTCGAAACCTGCTACCTGCTGCTCAACGGCGAACTGCCCACCGCCGAGCAGAAAGCCCAGTTCGTGGCCGTGGTCAAGAACCACACGATGGTTCACGAGCAACTCAAGACCTTTTTCAACGGTTTCCGTCGCGACGCCCACCCGATGGCCGTCATGTGTGGCGTAGTCGGCGCCCTGTCA…
124	T3W0016	FRA	Groundwater	KJ878485		Berge et al., 2014	GAGGGCGCTGCCCCCGTCGAGCTGCCAATTCTGACCGGTACAGTGGGTCCGGACGTGATCGACGTACGCGGCCTGACCGCCACCGGCCGCTTCACATTTGACCCTGGTTTCATGTCCACGGCGTCTTGCGATTCGAAGATCACCTACATCGATGGTGACAATGGCATTCTGCTGCACCGCGGCTACCCGATCGAACAACTGGCCGAGCAGTCCGACTACCTCGAAACCTGCTACCTGCTGCTCAACGGCGAACTGCCCACCGCCGAGCAGAAAGCCCAGTTCGTGGCCGTGGTCAAGAACCACACGATGGTTCACGAGCAACTCAAGACCTTTTTCAACGGTTTCCGTCGCGACGCCCACCCGATGGCCGTCATGTGTGGCGTAGTCGGCGCCCTGTCA…
124	USA0005	USA	Freshwater	KJ878528		Berge et al., 2014	GGCGCTGCCCCCGTCGAGCTGCCAATTCTGACCGGTACAGTGGGTCCGGACGTGATCGACGTACGCGGCCTGACCGCCACCGGCCGCTTCACATTTGACCCTGGTTTCATGTCCACGGCGTCTTGCGATTCGAAGATCACCTACATCGATGGTGACAATGGCATTCTGCTGCACCGCGGCTACCCGATCGAACAACTGGCCGAGCAGTCCGACTACCTCGAAACCTGCTACCTGCTGCTCAACGGCGAACTGCCCACCGCCGAGCAGAAAGCCCAGTTCGTGGCCGTGGTCAAGAACCACACGATGGTTCACGAGCAACTCAAGACCTTTTTCAACGGTTTCCGTCGCGACGCCCACCCGATGGCCGTCATGTGTGGCGTAGTCGGCGCCCTGTCAGCG…
124	9B1	USA	Plant	NA		Morris et al, 2000	GACGTACGCGGTCTCACCGCCACCGGCCGCTTCACATTTGACCCTGGCTTCATGTCCACGGCATCTTGCGAGTCGAAGATCACCTACATCGATGGTGATAATGGAATTCTGCTTCACCGCGGCTACCCGATCGAACAACTGGCCGAGCAGTCCGATTATCTGGAAACCTGCTACCTGCTGCTTAATGGCGAATTGCCAACCGCCGAGCAGAAAGCCCAGTTCGTTGCCGTGGTCAAAAACCACACGATGGTTCACGAACAGCTCAAGACCTTTTTCAACGGTTTCCGCCGTGATGCCCACCCGATGGCCGTCATGTGCGGCGTAGTCGGCGCCCTGTCGGCGTTCTATCACGACTCGCTGGACATCAATAACCCGCAGCACCGCGAGATTTCTGCCGTG…
125	CC1428	USA	Biofilm	KJ877870		Berge et al., 2014	TGCCCCCGTCGAGCTGCCAATTCTGACCGGTACAGTGGGTCCGGACGTGATCGACGTACGCGGCCTGACCGCCACCGGCCGCTTCACATTTGACCCTGGTTTCATGTCCACGGCGTCTTGCGATTCGAAGATCACCTACATCGATGGTGACAATGGCATTCTGCTGCACCGCGGCTACCCGATCGAACAACTGGCAGAGCAGTCCGACTACCTCGAAACCTGCTACCTGCTGCTCAACGGCGAACTGCCCACCGCCGAGCAGAAAGCCCAGTTCGTGGCCGTGGTCAAGAACCACACGATGGTTCACGAGCAACTCAAGACCTTTTTCAACGGTTTCCGTCGCGACGCCCACCCGATGGCCGTCATGTGTGGCGTAGTCGGCGCCCTGTCAGCGTTCTA…
125	USA0017	USA	Freshwater	KJ878530		Berge et al., 2014	GCTGCCCCCGTCGAGCTGCCAATTCTGACCGGTACAGTGGGTCCGGACGTGATCGACGTACGCGGCCTGACCGCCACCGGCCGCTTCACATTTGACCCTGGTTTCATGTCCACGGCGTCTTGCGATTCGAAGATCACCTACATCGATGGTGACAATGGCATTCTGCTGCACCGCGGCTACCCGATCGAACAACTGGCAGAGCAGTCCGACTACCTCGAAACCTGCTACCTGCTGCTCAACGGCGAACTGCCCACCGCCGAGCAGAAAGCCCAGTTCGTGGCCGTGGTCAAGAACCACACGATGGTTCACGAGCAACTCAAGACCTTTTTCAACGGTTTCCGTCGCGACGCCCACCCGATGGCCGTCATGTGTGGCGTAGTCGGCGCCCTGTCAGCGTTC…
126	CC1470	FRA	Freshwater	KJ877882		Berge et al., 2014	GTACGCGGCCTGACCGCCACCGGCCGCTTCACATTTGACCCTGGTTTCATGTCCACGGCGTCTTGCGATTCGAAGATCACCTACATTGATGGTGACAATGGCATTCTGCTGCACCGCGGCTACCCGATCGAACAACTGGCAGAGCAGTCCGACTACCTCGAAACCTGCTACCTGCTGCTCAACGGCGAACTGCCCACCGCCGAGCAGAAAGCCCAGTTCGTGGCCGTGGTCAAGAACCACACGATGGTTCACGAGCAACTCAAGACCTTTTTCAACGGTTTCCGTCGCGACGCCCACCCGATGGCCGTCATGTGTGGCGTAGTCGGCGCCCTGTCAGCGTTCTATCACGACTCGCTGGACATCAATAACCCGCAGCACCGCGAGATTTCCGCGGTCCGC…
126	CCV0098	FRA	Freshwater	KJ878052		Berge et al., 2014	GCCCCCGTCGAGCTGCCAATTCTGACCGGTACAGTGGGTCCGGACGTGATCGACGTACGCGGCCTGACCGCCACCGGCCGCTTCACATTTGACCCTGGTTTCATGTCCACGGCGTCTTGCGATTCGAAGATCACCTACATTGATGGTGACAATGGCATTCTGCTGCACCGCGGCTACCCGATCGAACAACTGGCAGAGCAGTCCGACTACCTCGAAACCTGCTACCTGCTGCTCAACGGCGAACTGCCCACCGCCGAGCAGAAAGCCCAGTTCGTGGCCGTGGTCAAGAACCACACGATGGTTCACGAGCAACTCAAGACCTTTTTCAACGGTTTCCGTCGCGACGCCCACCCGATGGCCGTCATGTGTGGCGTAGTCGGCGCCCTGTCAGCGTTCTAT…
126	CST0090	FRA	Rain	KJ878194		Berge et al., 2014	AGGGCGCTGCCCCCGTCGAGCTGCCAATTCTGACCGGTACAGTGGGTCCGGACGTGATCGACGTACGCGGCCTGACCGCCACCGGCCGCTTCACATTTGACCCTGGTTTCATGTCCACGGCGTCTTGCGATTCGAAGATCACCTACATTGATGGTGACAATGGCATTCTGCTGCACCGCGGCTACCCGATCGAACAACTGGCAGAGCAGTCCGACTACCTCGAAACCTGCTACCTGCTGCTCAACGGCGAACTGCCCACCGCCGAGCAGAAAGCCCAGTTCGTGGCCGTGGTCAAGAACCACACGATGGTTCACGAGCAACTCAAGACCTTTTTCAACGGTTTCCGTCGCGACGCCCACCCGATGGCCGTCATGTGTGGCGTAGTCGGCGCCCTGTCAG…
126	GAB0002	FRA	Biofilm	KJ878321		Berge et al., 2014	AGGGCGCTGCCCCCGTCGAGCTGCCAATTCTGACCGGTACAGTGGGTCCGGACGTGATCGACGTACGCGGCCTGACCGCCACCGGCCGCTTCACATTTGACCCTGGTTTCATGTCCACGGCGTCTTGCGATTCGAAGATCACCTACATTGATGGTGACAATGGCATTCTGCTGCACCGCGGCTACCCGATCGAACAACTGGCAGAGCAGTCCGACTACCTCGAAACCTGCTACCTGCTGCTCAACGGCGAACTGCCCACCGCCGAGCAGAAAGCCCAGTTCGTGGCCGTGGTCAAGAACCACACGATGGTTCACGAGCAACTCAAGACCTTTTTCAACGGTTTCCGTCGCGACGCCCACCCGATGGCCGTCATGTGTGGCGTAGTCGGCGCCCTGTCAG…
126	GAW0037	FRA	Irrigation_water	KJ878338		Berge et al., 2014	GGGCGCTGCCCCCGTCGAGCTGCCAATTCTGACCGGTACAGTGGGTCCGGACGTGATCGACGTACGCGGCCTGACCGCCACCGGCCGCTTCACATTTGACCCTGGTTTCATGTCCACGGCGTCTTGCGATTCGAAGATCACCTACATTGATGGTGACAATGGCATTCTGCTGCACCGCGGCTACCCGATCGAACAACTGGCAGAGCAGTCCGACTACCTCGAAACCTGCTACCTGCTGCTCAACGGCGAACTGCCCACCGCCGAGCAGAAAGCCCAGTTCGTGGCCGTGGTCAAGAACCACACGATGGTTCACGAGCAACTCAAGACCTTTTTCAACGGTTTCCGTCGCGACGCCCACCCGATGGCCGTCATGTGTGGCGTAGTCGGCGCCCTGTCAGC…
126	JAW0002	FRA	Groundwater	KJ878367		Berge et al., 2014	AGGGCGCTGCCCCCGTCGAGCTGCCAATTCTGACCGGTACAGTGGGTCCGGACGTGATCGACGTACGCGGCCTGACCGCCACCGGCCGCTTCACATTTGACCCTGGTTTCATGTCCACGGCGTCTTGCGATTCGAAGATCACCTACATTGATGGTGACAATGGCATTCTGCTGCACCGCGGCTACCCGATCGAACAACTGGCAGAGCAGTCCGACTACCTCGAAACCTGCTACCTGCTGCTCAACGGCGAACTGCCCACCGCCGAGCAGAAAGCCCAGTTCGTGGCCGTGGTCAAGAACCACACGATGGTTCACGAGCAACTCAAGACCTTTTTCAACGGTTTCCGTCGCGACGCCCACCCGATGGCCGTCATGTGTGGCGTAGTCGGCGCCCTGTCAG…
126	SZB0004	FRA	Biofilm	KJ878463		Berge et al., 2014	CACCGGCCGCTTCACATTTGACCCTGGTTTCATGTCCACGGCGTCTTGCGATTCGAAGATCACCTACATTGATGGTGACAATGGCATTCTGCTGCACCGCGGCTACCCGATCGAACAACTGGCAGAGCAGTCCGACTACCTCGAAACCTGCTACCTGCTGCTCAACGGCGAACTGCCCACCGCCGAGCAGAAAGCCCAGTTCGTGGCCGTGGTCAAGAACCACACGATGGTTCACGAGCAACTCAAGACCTTTTTCAACGGTTTCCGTCGCGACGCCCACCCGATGGCCGTCATGTGTGGCGTAGTCGGCGCCCTGTCAGCGTTCTATCACGACTCGCTGGACATCAATAACCCGCAGCACCGCGAGATTTCCGCGGTCCGCCTGGTCGCCAAGATGCC…
126	UB0248	FRA	Freshwater	KJ878512		Berge et al., 2014	CGTGATCGACGTACGCGGCCTGACCGCCACCGGCCGCTTCACATTTGACCCTGGTTTCATGTCCACGGCGTCTTGCGATTCGAAGATCACCTACATTGATGGTGACAATGGCATTCTGCTGCACCGCGGCTACCCGATCGAACAACTGGCAGAGCAGTCCGACTACCTCGAAACCTGCTACCTGCTGCTCAACGGCGAACTGCCCACCGCCGAGCAGAAAGCCCAGTTCGTGGCCGTGGTCAAGAACCACACGATGGTTCACGAGCAACTCAAGACCTTTTTCAACGGTTTCCGTCGCGACGCCCACCCGATGGCCGTCATGTGTGGCGTAGTCGGCGCCCTGTCAGCGTTCTATCACGACTCGCTGGACATCAATAACCCGCAGCACCGCGAGATTTC…
126	Vi0008	FRA	Freshwater	KJ878549		Berge et al., 2014	GTGATCGACGTACGCGGCCTGACCGCCACCGGCCGCTTCACATTTGACCCTGGTTTCATGTCCACGGCGTCTTGCGATTCGAAGATCACCTACATTGATGGTGACAATGGCATTCTGCTGCACCGCGGCTACCCGATCGAACAACTGGCAGAGCAGTCCGACTACCTCGAAACCTGCTACCTGCTGCTCAACGGCGAACTGCCCACCGCCGAGCAGAAAGCCCAGTTCGTGGCCGTGGTCAAGAACCACACGATGGTTCACGAGCAACTCAAGACCTTTTTCAACGGTTTCCGTCGCGACGCCCACCCGATGGCCGTCATGTGTGGCGTAGTCGGCGCCCTGTCAGCGTTCTATCACGACTCGCTGGACATCAATAACCCGCAGCACCGCGAGATTTCC…
126	Vi0015	FRA	Freshwater	KJ878553		Berge et al., 2014	GTGATCGACGTACGCGGCCTGACCGCCACCGGCCGCTTCACATTTGACCCTGGTTTCATGTCCACGGCGTCTTGCGATTCGAAGATCACCTACATTGATGGTGACAATGGCATTCTGCTGCACCGCGGCTACCCGATCGAACAACTGGCAGAGCAGTCCGACTACCTCGAAACCTGCTACCTGCTGCTCAACGGCGAACTGCCCACCGCCGAGCAGAAAGCCCAGTTCGTGGCCGTGGTCAAGAACCACACGATGGTTCACGAGCAACTCAAGACCTTTTTCAACGGTTTCCGTCGCGACGCCCACCCGATGGCCGTCATGTGTGGCGTAGTCGGCGCCCTGTCAGCGTTCTATCACGACTCGCTGGACATCAATAACCCGCAGCACCGCGAGATTTCC…
127	CAW0019	FRA	Groundwater	KJ877845		Berge et al., 2014	GGGCGCTGCCCCCGTCGAGCTGCCAATTCTGACCGGTACAGTGGGTCCGGACGTGATCGACGTACGCGGCCTGACCGCCACCGGCCGCTTCACATTTGACCCTGGTTTCATGTCCACGGCGTCTTGCGATTCGAAGATCACCTACATCGATGGTGACAATGGCATTCTGCTACACCGCGGCTACCCGATCGAACAACTGGCCGAGCAGTCCGACTACCTCGAAACCTGCTACCTGCTGCTCAACGGCGAACTGCCCACCGCCGAGCAGAAAGCCCAGTTCGTGGCCGTGGTCAAGAACCACACGATGGTTCACGAGCAACTCAAGACCTTTTTCAACGGTTTCCGTCGCGACGCCCACCCGATGGCCGTCATGTGTGGCGTAGTCGGTGCCCTGTCAGC…
127	CMO0001	FRA	Rain	KJ878142		Berge et al., 2014	GCTGCCCCCGTCGAGCTGCCAATTCTGACCGGTACAGTGGGTCCGGACGTGATCGACGTACGCGGCCTGACCGCCACCGGCCGCTTCACATTTGACCCTGGTTTCATGTCCACGGCGTCTTGCGATTCGAAGATCACCTACATCGATGGTGACAATGGCATTCTGCTACACCGCGGCTACCCGATCGAACAACTGGCCGAGCAGTCCGACTACCTCGAAACCTGCTACCTGCTGCTCAACGGCGAACTGCCCACCGCCGAGCAGAAAGCCCAGTTCGTGGCCGTGGTCAAGAACCACACGATGGTTCACGAGCAACTCAAGACCTTTTTCAACGGTTTCCGTCGCGACGCCCACCCGATGGCCGTCATGTGTGGCGTAGTCGGTGCCCTGTCAGCGTTC…
127	CMO0100	FRA	Rain	KJ878155		Berge et al., 2014	GAGGGCGCTGCCCCCGTCGAGCTGCCAATTCTGACCGGTACAGTGGGTCCGGACGTGATCGACGTACGCGGCCTGACCGCCACCGGCCGCTTCACATTTGACCCTGGTTTCATGTCCACGGCGTCTTGCGATTCGAAGATCACCTACATCGATGGTGACAATGGCATTCTGCTACACCGCGGCTACCCGATCGAACAACTGGCCGAGCAGTCCGACTACCTCGAAACCTGCTACCTGCTGCTCAACGGCGAACTGCCCACCGCCGAGCAGAAAGCCCAGTTCGTGGCCGTGGTCAAGAACCACACGATGGTTCACGAGCAACTCAAGACCTTTTTCAACGGTTTCCGTCGCGACGCCCACCCGATGGCCGTCATGTGTGGCGTAGTCGGTGCCCTGTCA…
127	CST0006	FRA	Rain	KJ878181		Berge et al., 2014	AGGGCGCTGCCCCCGTCGAGCTGCCAATTCTGACCGGTACAGTGGGTCCGGACGTGATCGACGTACGCGGCCTGACCGCCACCGGCCGCTTCACATTTGACCCTGGTTTCATGTCCACGGCGTCTTGCGATTCGAAGATCACCTACATCGATGGTGACAATGGCATTCTGCTACACCGCGGCTACCCGATCGAACAACTGGCCGAGCAGTCCGACTACCTCGAAACCTGCTACCTGCTGCTCAACGGCGAACTGCCCACCGCCGAGCAGAAAGCCCAGTTCGTGGCCGTGGTCAAGAACCACACGATGGTTCACGAGCAACTCAAGACCTTTTTCAACGGTTTCCGTCGCGACGCCCACCCGATGGCCGTCATGTGTGGCGTAGTCGGTGCCCTGTCAG…
127	CST0034	FRA	Rain	KJ878184		Berge et al., 2014	GCGCTGCCCCCGTCGAGCTGCCAATTCTGACCGGTACAGTGGGTCCGGACGTGATCGACGTACGCGGCCTGACCGCCACCGGCCGCTTCACATTTGACCCTGGTTTCATGTCCACGGCGTCTTGCGATTCGAAGATCACCTACATCGATGGTGACAATGGCATTCTGCTACACCGCGGCTACCCGATCGAACAACTGGCCGAGCAGTCCGACTACCTCGAAACCTGCTACCTGCTGCTCAACGGCGAACTGCCCACCGCCGAGCAGAAAGCCCAGTTCGTGGCCGTGGTCAAGAACCACACGATGGTTCACGAGCAACTCAAGACCTTTTTCAACGGTTTCCGTCGCGACGCCCACCCGATGGCCGTCATGTGTGGCGTAGTCGGTGCCCTGTCAGCGT…
127	CST0086	FRA	Rain	KJ878191		Berge et al., 2014	GAGGGCGCTGCCCCCGTCGAGCTGCCAATTCTGACCGGTACAGTGGGTCCGGACGTGATCGACGTACGCGGCCTGACCGCCACCGGCCGCTTCACATTTGACCCTGGTTTCATGTCCACGGCGTCTTGCGATTCGAAGATCACCTACATCGATGGTGACAATGGCATTCTGCTACACCGCGGCTACCCGATCGAACAACTGGCCGAGCAGTCCGACTACCTCGAAACCTGCTACCTGCTGCTCAACGGCGAACTGCCCACCGCCGAGCAGAAAGCCCAGTTCGTGGCCGTGGTCAAGAACCACACGATGGTTCACGAGCAACTCAAGACCTTTTTCAACGGTTTCCGTCGCGACGCCCACCCGATGGCCGTCATGTGTGGCGTAGTCGGTGCCCTGTCA…
127	GAB0023	FRA	Biofilm	KJ878327		Berge et al., 2014	CGAGGGCGCTGCCCCCGTCGAGCTGCCAATTCTGACCGGTACAGTGGGTCCGGACGTGATCGACGTACGCGGCCTGACCGCCACCGGCCGCTTCACATTTGACCCTGGTTTCATGTCCACGGCGTCTTGCGATTCGAAGATCACCTACATCGATGGTGACAATGGCATTCTGCTACACCGCGGCTACCCGATCGAACAACTGGCCGAGCAGTCCGACTACCTCGAAACCTGCTACCTGCTGCTCAACGGCGAACTGCCCACCGCCGAGCAGAAAGCCCAGTTCGTGGCCGTGGTCAAGAACCACACGATGGTTCACGAGCAACTCAAGACCTTTTTCAACGGTTTCCGTCGCGACGCCCACCCGATGGCCGTCATGTGTGGCGTAGTCGGTGCCCTGTC…
127	GAW0049	FRA	Irrigation_water	KJ878340		Berge et al., 2014	AGGGCGCTGCCCCCGTCGAGCTGCCAATTCTGACCGGTACAGTGGGTCCGGACGTGATCGACGTACGCGGCCTGACCGCCACCGGCCGCTTCACATTTGACCCTGGTTTCATGTCCACGGCGTCTTGCGATTCGAAGATCACCTACATCGATGGTGACAATGGCATTCTGCTACACCGCGGCTACCCGATCGAACAACTGGCCGAGCAGTCCGACTACCTCGAAACCTGCTACCTGCTGCTCAACGGCGAACTGCCCACCGCCGAGCAGAAAGCCCAGTTCGTGGCCGTGGTCAAGAACCACACGATGGTTCACGAGCAACTCAAGACCTTTTTCAACGGTTTCCGTCGCGACGCCCACCCGATGGCCGTCATGTGTGGCGTAGTCGGTGCCCTGTCAG…
127	JAW0003	FRA	Groundwater	KJ878368		Berge et al., 2014	GGGCGCTGCCCCCGTCGAGCTGCCAATTCTGACCGGTACAGTGGGTCCGGACGTGATCGACGTACGCGGCCTGACCGCCACCGGCCGCTTCACATTTGACCCTGGTTTCATGTCCACGGCGTCTTGCGATTCGAAGATCACCTACATCGATGGTGACAATGGCATTCTGCTACACCGCGGCTACCCGATCGAACAACTGGCCGAGCAGTCCGACTACCTCGAAACCTGCTACCTGCTGCTCAACGGCGAACTGCCCACCGCCGAGCAGAAAGCCCAGTTCGTGGCCGTGGTCAAGAACCACACGATGGTTCACGAGCAACTCAAGACCTTTTTCAACGGTTTCCGTCGCGACGCCCACCCGATGGCCGTCATGTGTGGCGTAGTCGGTGCCCTGTCAGC…
127	T3W0001	FRA	Groundwater	KJ878480		Berge et al., 2014	AGGGCGCTGCCCCCGTCGAGCTGCCAATTCTGACCGGTACAGTGGGTCCGGACGTGATCGACGTACGCGGCCTGACCGCCACCGGCCGCTTCACATTTGACCCTGGTTTCATGTCCACGGCGTCTTGCGATTCGAAGATCACCTACATCGATGGTGACAATGGCATTCTGCTACACCGCGGCTACCCGATCGAACAACTGGCCGAGCAGTCCGACTACCTCGAAACCTGCTACCTGCTGCTCAACGGCGAACTGCCCACCGCCGAGCAGAAAGCCCAGTTCGTGGCCGTGGTCAAGAACCACACGATGGTTCACGAGCAACTCAAGACCTTTTTCAACGGTTTCCGTCGCGACGCCCACCCGATGGCCGTCATGTGTGGCGTAGTCGGTGCCCTGTCAG…
128	CC0170	FRA	Plant	KJ877851		Berge et al., 2014	CCGGACGTGATCGACGTACGCGGCCTGACCGCCACCGGCCGCTTCACATTTGACCCTGGTTTCATGTCCACGGCGTCTTGCGATTCGAAGATCACCTACATCGATGGTGACAATGGCATTCTGCTGCACCGCGGCTACCCGATCGAACAACTGGCCGAGCAGTCCGACTACCTCGAAACCTGCTACCTGCTACTCAACGGCGAACTGCCCACCGCCGAGCAGAAAGCCCAGTTCGTGGCCGTGGTCAAGAACCACACGATGGTTCACGAGCAACTCAAGACCTTTTTCAACGGTTTCCGTCGCGACGCCCACCCGATGGCCGTCATGTGTGGCGTAGTCGGTGCCCTGTCAGCGTTCTACCACGACTCGCTGGACATCAATAACCCGCAGCACCGCGAG…
128	CC0206	FRA	Plant	KJ877852		Berge et al., 2014	GTACGCGGCCTGACCGCCACCGGCCGCTTCACATTTGACCCTGGTTTCATGTCCACGGCGTCTTGCGATTCGAAGATCACCTACATCGATGGTGACAATGGCATTCTGCTGCACCGCGGCTACCCGATCGAACAACTGGCCGAGCAGTCCGACTACCTCGAAACCTGCTACCTGCTACTCAACGGCGAACTGCCCACCGCCGAGCAGAAAGCCCAGTTCGTGGCCGTGGTCAAGAACCACACGATGGTTCACGAGCAACTCAAGACCTTTTTCAACGGTTTCCGTCGCGACGCCCACCCGATGGCCGTCATGTGTGGCGTAGTCGGTGCCCTGTCAGCGTTCTACCACGACTCGCTGGACATCAATAACCCGCAGCACCGCGAGATTTCCGCGGTACGC…
128	CC0670	ITA	Plant	KJ877865		Berge et al., 2014	GTACGCGGCCTGACCGCCACCGGCCGCTTCACATTTGACCCTGGTTTCATGTCCACGGCGTCTTGCGATTCGAAGATCACCTACATCGATGGTGACAATGGCATTCTGCTGCACCGCGGCTACCCGATCGAACAACTGGCCGAGCAGTCCGACTACCTCGAAACCTGCTACCTGCTACTCAACGGCGAACTGCCCACCGCCGAGCAGAAAGCCCAGTTCGTGGCCGTGGTCAAGAACCACACGATGGTTCACGAGCAACTCAAGACCTTTTTCAACGGTTTCCGTCGCGACGCCCACCCGATGGCCGTCATGTGTGGCGTAGTCGGTGCCCTGTCAGCGTTCTACCACGACTCGCTGGACATCAATAACCCGCAGCACCGCGAGATTTCCGCGGTACGC…
128	GAB0019	FRA	Biofilm	KJ878325		Berge et al., 2014	GAGGGCGCTGCCCCCGTCGAGCTGCCAATTCTGACCGGTACAGTGGGTCCGGACGTGATCGACGTACGCGGCCTGACCGCCACCGGCCGCTTCACATTTGACCCTGGTTTCATGTCCACGGCGTCTTGCGATTCGAAGATCACCTACATCGATGGTGACAATGGCATTCTGCTGCACCGCGGCTACCCGATCGAACAACTGGCCGAGCAGTCCGACTACCTCGAAACCTGCTACCTGCTACTCAACGGCGAACTGCCCACCGCCGAGCAGAAAGCCCAGTTCGTGGCCGTGGTCAAGAACCACACGATGGTTCACGAGCAACTCAAGACCTTTTTCAACGGTTTCCGTCGCGACGCCCACCCGATGGCCGTCATGTGTGGCGTAGTCGGTGCCCTGTCA…
128	GAW0001	FRA	Irrigation_water	KJ878333		Berge et al., 2014	GAGGGCGCTGCCCCCGTCGAGCTGCCAATTCTGACCGGTACAGTGGGTCCGGACGTGATCGACGTACGCGGCCTGACCGCCACCGGCCGCTTCACATTTGACCCTGGTTTCATGTCCACGGCGTCTTGCGATTCGAAGATCACCTACATCGATGGTGACAATGGCATTCTGCTGCACCGCGGCTACCCGATCGAACAACTGGCCGAGCAGTCCGACTACCTCGAAACCTGCTACCTGCTACTCAACGGCGAACTGCCCACCGCCGAGCAGAAAGCCCAGTTCGTGGCCGTGGTCAAGAACCACACGATGGTTCACGAGCAACTCAAGACCTTTTTCAACGGTTTCCGTCGCGACGCCCACCCGATGGCCGTCATGTGTGGCGTAGTCGGTGCCCTGTCA…
128	LNW0011	FRA	Irrigation_water	KJ878404		Berge et al., 2014	GGAGCGCTGCCCCCGTCGAGCTGCCAATTCTGACCGGTACAGTGGGTCCGGACGTGATCGACGTACGCGGCCTGACCGCCACCGGCCGCTTCACATTTGACCCTGGTTTCATGTCCACGGCGTCTTGCGATTCGAAGATCACCTACATCGATGGTGACAATGGCATTCTGCTGCACCGCGGCTACCCGATCGAACAACTGGCCGAGCAGTCCGACTACCTCGAAACCTGCTACCTGCTACTCAACGGCGAACTGCCCACCGCCGAGCAGAAAGCCCAGTTCGTGGCCGTGGTCAAGAACCACACGATGGTTCACGAGCAACTCAAGACCTTTTTCAACGGTTTCCGTCGCGACGCCCACCCGATGGCCGTCATGTGTGGCGTAGTCGGTGCCCTGTCAG…
128	LNW0026	FRA	Irrigation_water	KJ878409		Berge et al., 2014	GGCGCTGCCCCCGTCGAGCTGCCAATTCTGACCGGTACAGTGGGTCCGGACGTGATCGACGTACGCGGCCTGACCGCCACCGGCCGCTTCACATTTGACCCTGGTTTCATGTCCACGGCGTCTTGCGATTCGAAGATCACCTACATCGATGGTGACAATGGCATTCTGCTGCACCGCGGCTACCCGATCGAACAACTGGCCGAGCAGTCCGACTACCTCGAAACCTGCTACCTGCTACTCAACGGCGAACTGCCCACCGCCGAGCAGAAAGCCCAGTTCGTGGCCGTGGTCAAGAACCACACGATGGTTCACGAGCAACTCAAGACCTTTTTCAACGGTTTCCGTCGCGACGCCCACCCGATGGCCGTCATGTGTGGCGTAGTCGGTGCCCTGTCAGCG…
128	Vi0009	FRA	Freshwater	KJ878550		Berge et al., 2014	AGTGATCGACGTACGCGGCCTGACCGCCACCGGCCGCTTCACATTTGACCCTGGTTTCATGTCCACGGCGTCTTGCGATTCGAAGATCACCTACATCGATGGTGACAATGGCATTCTGCTGCACCGCGGCTACCCGATCGAACAACTGGCCGAGCAGTCCGACTACCTCGAAACCTGCTACCTGCTACTCAACGGCGAACTGCCCACCGCCGAGCAGAAAGCCCAGTTCGTGGCCGTGGTCAAGAACCACACGATGGTTCACGAGCAACTCAAGACCTTTTTCAACGGTTTCCGTCGCGACGCCCACCCGATGGCCGTCATGTGTGGCGTAGTCGGTGCCCTGTCAGCGTTCTACCACGACTCGCTGGACATCAATAACCCGCAGCACCGCGAGATTTC…
128	Vi0011	FRA	Freshwater	KJ878551		Berge et al., 2014	GTGATCGACGTACGCGGCCTGACCGCCACCGGCCGCTTCACATTTGACCCTGGTTTCATGTCCACGGCGTCTTGCGATTCGAAGATCACCTACATCGATGGTGACAATGGCATTCTGCTGCACCGCGGCTACCCGATCGAACAACTGGCCGAGCAGTCCGACTACCTCGAAACCTGCTACCTGCTACTCAACGGCGAACTGCCCACCGCCGAGCAGAAAGCCCAGTTCGTGGCCGTGGTCAAGAACCACACGATGGTTCACGAGCAACTCAAGACCTTTTTCAACGGTTTCCGTCGCGACGCCCACCCGATGGCCGTCATGTGTGGCGTAGTCGGTGCCCTGTCAGCGTTCTACCACGACTCGCTGGACATCAATAACCCGCAGCACCGCGAGATTTCC…
128	Vi0017	FRA	Freshwater	KJ878555		Berge et al., 2014	GTGATCGACGTACGCGGCCTGACCGCCACCGGCCGCTTCACATTTGACCCTGGTTTCATGTCCACGGCGTCTTGCGATTCGAAGATCACCTACATCGATGGTGACAATGGCATTCTGCTGCACCGCGGCTACCCGATCGAACAACTGGCCGAGCAGTCCGACTACCTCGAAACCTGCTACCTGCTACTCAACGGCGAACTGCCCACCGCCGAGCAGAAAGCCCAGTTCGTGGCCGTGGTCAAGAACCACACGATGGTTCACGAGCAACTCAAGACCTTTTTCAACGGTTTCCGTCGCGACGCCCACCCGATGGCCGTCATGTGTGGCGTAGTCGGTGCCCTGTCAGCGTTCTACCACGACTCGCTGGACATCAATAACCCGCAGCACCGCGAGATTTCC…
129	233	ITA	Plant	KJ877792		Berge et al., 2014	GCCCCCGTCGAGCTGCCAATTCTGACCGGTACAGTGGGTCCGGACGTGATCGACGTACGCGGCCTGACCGCCACCGGCCGCTTCACATTTGACCCTGGTTTCATGTCCACGGCGTCTTGCGATTCGAAGATCACCTACATCGATGGTGACAATGGCATTCTGCTGCACCGCGGCTACCCGATCGAACAACTGGCCGAGCAGTCCGACTACCTCGAAACCTGCTACCTGCTGCTCAACGGCGAACTGCCCACCGCCGAGCAGAAAGCCCAGTTCGTGGCCGTGGTCAAGAACCACACGATGGTTCACGAGCAACTCAAGACCTTTTTCAACGGTTTCCGTCGCGACGCCCACCCGATGGCCGTCATGTGTGGCGTAGTCGGTGCCCTGTCAGCGTTCTAC…
129	B728a	USA	Plant	CP000075		Berge et al., 2014	ATGGCTGACAAAAAAGCGCAGTTGATCATCGAGGGCGCTGCCCCCGTCGAGCTGCCAATTCTGACCGGTACAGTGGGTCCGGACGTGATCGACGTACGCGGCCTGACCGCCACCGGCCGCTTCACATTTGACCCTGGTTTCATGTCCACGGCGTCTTGCGATTCGAAGATCACCTACATCGATGGTGACAATGGCATTCTGCTGCACCGCGGCTACCCGATCGAACAACTGGCCGAGCAGTCCGACTACCTCGAAACCTGCTACCTGCTGCTCAACGGCGAACTGCCCACCGCCGAGCAGAAAGCCCAGTTCGTGGCCGTGGTCAAGAACCACACGATGGTTCACGAGCAACTCAAGACCTTTTTCAACGGTTTCCGTCGCGACGCCCACCCGATGGCC…
129	CC0301	FRA	Plant	KJ877853		Berge et al., 2014	GTACGCGGCCTGACCGCCACCGGCCGCTTCACATTTGACCCTGGTTTCATGTCCACGGCGTCTTGCGATTCGAAGATCACCTACATCGATGGTGACAATGGCATTCTGCTGCACCGCGGCTACCCGATCGAACAACTGGCCGAGCAGTCCGACTACCTCGAAACCTGCTACCTGCTGCTCAACGGCGAACTGCCCACCGCCGAGCAGAAAGCCCAGTTCGTGGCCGTGGTCAAGAACCACACGATGGTTCACGAGCAACTCAAGACCTTTTTCAACGGTTTCCGTCGCGACGCCCACCCGATGGCCGTCATGTGTGGCGTAGTCGGTGCCCTGTCAGCGTTCTACCACGACTCGCTGGACATCAATAACCCGCAGCACCGCGAGATTTCCGCGGTCCGC…
129	CC0654	FRA	Plant	KJ877859		Berge et al., 2014	ACGTACGCGGCCTGACCGCCACCGGCCGCTTCACATTTGACCCTGGTTTCATGTCCACGGCGTCTTGCGATTCGAAGATCACCTACATCGATGGTGACAATGGCATTCTGCTGCACCGCGGCTACCCGATCGAACAACTGGCCGAGCAGTCCGACTACCTCGAAACCTGCTACCTGCTGCTCAACGGCGAACTGCCCACCGCCGAGCAGAAAGCCCAGTTCGTGGCCGTGGTCAAGAACCACACGATGGTTCACGAGCAACTCAAGACCTTTTTCAACGGTTTCCGTCGCGACGCCCACCCGATGGCCGTCATGTGTGGCGTAGTCGGTGCCCTGTCAGCGTTCTACCACGACTCGCTGGACATCAATAACCCGCAGCACCGCGAGATTTCCGCGGTCC…
129	CC0658	FRA	Plant	KJ877861		Berge et al., 2014	GTACGCGGCCTGACCGCCACCGGCCGCTTCACATTTGACCCTGGTTTCATGTCCACGGCGTCTTGCGATTCGAAGATCACCTACATCGATGGTGACAATGGCATTCTGCTGCACCGCGGCTACCCGATCGAACAACTGGCCGAGCAGTCCGACTACCTCGAAACCTGCTACCTGCTGCTCAACGGCGAACTGCCCACCGCCGAGCAGAAAGCCCAGTTCGTGGCCGTGGTCAAGAACCACACGATGGTTCACGAGCAACTCAAGACCTTTTTCAACGGTTTCCGTCGCGACGCCCACCCGATGGCCGTCATGTGTGGCGTAGTCGGTGCCCTGTCAGCGTTCTACCACGACTCGCTGGACATCAATAACCCGCAGCACCGCGAGATTTCCGCGGTCCGC…
129	CC0659	FRA	Plant	KJ877862		Berge et al., 2014	GTACGCGGCCTGACCGCCACCGGCCGCTTCACATTTGACCCTGGTTTCATGTCCACGGCGTCTTGCGATTCGAAGATCACCTACATCGATGGTGACAATGGCATTCTGCTGCACCGCGGCTACCCGATCGAACAACTGGCCGAGCAGTCCGACTACCTCGAAACCTGCTACCTGCTGCTCAACGGCGAACTGCCCACCGCCGAGCAGAAAGCCCAGTTCGTGGCCGTGGTCAAGAACCACACGATGGTTCACGAGCAACTCAAGACCTTTTTCAACGGTTTCCGTCGCGACGCCCACCCGATGGCCGTCATGTGTGGCGTAGTCGGTGCCCTGTCAGCGTTCTACCACGACTCGCTGGACATCAATAACCCGCAGCACCGCGAGATTTCCGCGGTCCGC…
129	CC1448	FRA	Biofilm	KJ877877		Berge et al., 2014	CGACGTACGCGGCCTGACCGCCACCGGCCGCTTCACATTTGACCCTGGTTTCATGTCCACGGCGTCTTGCGATTCGAAGATCACCTACATCGATGGTGACAATGGCATTCTGCTGCACCGCGGCTACCCGATCGAACAACTGGCCGAGCAGTCCGACTACCTCGAAACCTGCTACCTGCTGCTCAACGGCGAACTGCCCACCGCCGAGCAGAAAGCCCAGTTCGTGGCCGTGGTCAAGAACCACACGATGGTTCACGAGCAACTCAAGACCTTTTTCAACGGTTTCCGTCGCGACGCCCACCCGATGGCCGTCATGTGTGGCGTAGTCGGTGCCCTGTCAGCGTTCTACCACGACTCGCTGGACATCAATAACCCGCAGCACCGCGAGATTTCCGCGGT…
129	CC1449	FRA	Biofilm	KJ877878		Berge et al., 2014	GTACGCGGCCTGACCGCCACCGGCCGCTTCACATTTGACCCTGGTTTCATGTCCACGGCGTCTTGCGATTCGAAGATCACCTACATCGATGGTGACAATGGCATTCTGCTGCACCGCGGCTACCCGATCGAACAACTGGCCGAGCAGTCCGACTACCTCGAAACCTGCTACCTGCTGCTCAACGGCGAACTGCCCACCGCCGAGCAGAAAGCCCAGTTCGTGGCCGTGGTCAAGAACCACACGATGGTTCACGAGCAACTCAAGACCTTTTTCAACGGTTTCCGTCGCGACGCCCACCCGATGGCCGTCATGTGTGGCGTAGTCGGTGCCCTGTCAGCGTTCTACCACGACTCGCTGGACATCAATAACCCGCAGCACCGCGAGATTTCCGCGGTACGC…
129	CC1450	FRA	Biofilm	KJ877879		Berge et al., 2014	GTACGCGGCCTGACCGCCACCGGCCGCTTCACATTTGACCCTGGTTTCATGTCCACGGCGTCTTGCGATTCGAAGATCACCTACATCGATGGTGACAATGGCATTCTGCTGCACCGCGGCTACCCGATCGAACAACTGGCCGAGCAGTCCGACTACCTCGAAACCTGCTACCTGCTGCTCAACGGCGAACTGCCCACCGCCGAGCAGAAAGCCCAGTTCGTGGCCGTGGTCAAGAACCACACGATGGTTCACGAGCAACTCAAGACCTTTTTCAACGGTTTCCGTCGCGACGCCCACCCGATGGCCGTCATGTGTGGCGTAGTCGGTGCCCTGTCAGCGTTCTACCACGACTCGCTGGACATCAATAACCCGCAGCACCGCGAGATTTCCGCGGTACGC…
129	CC1671	FRA	Plant	KJ877905		Berge et al., 2014	CGCTGCCCCCGTCGAGCTGCCAATTCTGACCGGTACAGTGGGTCCGGACGTGATCGACGTACGCGGCCTGACCGCCACCGGCCGCTTCACATTTGACCCTGGTTTCATGTCCACGGCGTCTTGCGATTCGAAGATCACCTACATCGATGGTGACAATGGCATTCTGCTGCACCGCGGCTACCCGATCGAACAACTGGCCGAGCAGTCCGACTACCTCGAAACCTGCTACCTGCTGCTCAACGGCGAACTGCCCACCGCCGAGCAGAAAGCCCAGTTCGTGGCCGTGGTCAAGAACCACACGATGGTTCACGAGCAACTCAAGACCTTTTTCAACGGTTTCCGTCGCGACGCCCACCCGATGGCCGTCATGTGTGGCGTAGTCGGTGCCCTGTCAGCGTT…
129	CCV0093	FRA	Freshwater	KJ878049		Berge et al., 2014	GCCCCCGTCGAGCTGCCAATTCTGACCGGTACAGTGGGTCCGGACGTGATCGACGTACGCGGCCTGACCGCCACCGGCCGCTTCACATTTGACCCTGGTTTCATGTCCACGGCGTCTTGCGATTCGAAGATCACCTACATCGATGGTGACAATGGCATTCTGCTGCACCGCGGCTACCCGATCGAACAACTGGCCGAGCAGTCCGACTACCTCGAAACCTGCTACCTGCTGCTCAACGGCGAACTGCCCACCGCCGAGCAGAAAGCCCAGTTCGTGGCCGTGGTCAAGAACCACACGATGGTTCACGAGCAACTCAAGACCTTTTTCAACGGTTTCCGTCGCGACGCCCACCCGATGGCCGTCATGTGTGGCGTAGTCGGTGCCCTGTCAGCGTTCTAC…
129	CMO0072	FRA	Rain	KJ878152		Berge et al., 2014	GAGGGCGCTGCCCCCGTCGAGCTGCCAATTCTGACCGGTACAGTGGGTCCGGACGTGATCGACGTACGCGGCCTGACCGCCACCGGCCGCTTCACATTTGACCCTGGTTTCATGTCCACGGCGTCTTGCGATTCGAAGATCACCTACATCGATGGTGACAATGGCATTCTGCTGCACCGCGGCTACCCGATCGAACAACTGGCCGAGCAGTCCGACTACCTCGAAACCTGCTACCTGCTGCTCAACGGCGAACTGCCCACCGCCGAGCAGAAAGCCCAGTTCGTGGCCGTGGTCAAGAACCACACGATGGTTCACGAGCAACTCAAGACCTTTTTCAACGGTTTCCGTCGCGACGCCCACCCGATGGCCGTCATGTGTGGCGTAGTCGGTGCCCTGTCA…
129	CMW0023	FRA	Freshwater	KJ878166		Berge et al., 2014	GGGCGCTGCCCCCGTCGAGCTGCCAATTCTGACCGGTACAGTGGGTCCGGACGTGATCGACGTACGCGGCCTGACCGCCACCGGCCGCTTCACATTTGACCCTGGTTTCATGTCCACGGCGTCTTGCGATTCGAAGATCACCTACATCGATGGTGACAATGGCATTCTGCTGCACCGCGGCTACCCGATCGAACAACTGGCCGAGCAGTCCGACTACCTCGAAACCTGCTACCTGCTGCTCAACGGCGAACTGCCCACCGCCGAGCAGAAAGCCCAGTTCGTGGCCGTGGTCAAGAACCACACGATGGTTCACGAGCAACTCAAGACCTTTTTCAACGGTTTCCGTCGCGACGCCCACCCGATGGCCGTCATGTGTGGCGTAGTCGGTGCCCTGTCAGC…
129	CST0087	FRA	Rain	KJ878192		Berge et al., 2014	GAGGGCGCTGCCCCCGTCGAGCTGCCAATTCTGACCGGTACAGTGGGTCCGGACGTGATCGACGTACGCGGCCTGACCGCCACCGGCCGCTTCACATTTGACCCTGGTTTCATGTCCACGGCGTCTTGCGATTCGAAGATCACCTACATCGATGGTGACAATGGCATTCTGCTGCACCGCGGCTACCCGATCGAACAACTGGCCGAGCAGTCCGACTACCTCGAAACCTGCTACCTGCTGCTCAACGGCGAACTGCCCACCGCCGAGCAGAAAGCCCAGTTCGTGGCCGTGGTCAAGAACCACACGATGGTTCACGAGCAACTCAAGACCTTTTTCAACGGTTTCCGTCGCGACGCCCACCCGATGGCCGTCATGTGTGGCGTAGTCGGTGCCCTGTCA…
129	CSZ0001	FRA	Snowfall	KJ878198		Berge et al., 2014	GAGGGCGCTGCCCCCGTCGAGCTGCCAATTCTGACCGGTACAGTGGGTCCGGACGTGATCGACGTACGCGGCCTGACCGCCACCGGCCGCTTCACATTTGACCCTGGTTTCATGTCCACGGCGTCTTGCGATTCGAAGATCACCTACATCGATGGTGACAATGGCATTCTGCTGCACCGCGGCTACCCGATCGAACAACTGGCCGAGCAGTCCGACTACCTCGAAACCTGCTACCTGCTGCTCAACGGCGAACTGCCCACCGCCGAGCAGAAAGCCCAGTTCGTGGCCGTGGTCAAGAACCACACGATGGTTCACGAGCAACTCAAGACCTTTTTCAACGGTTTCCGTCGCGACGCCCACCCGATGGCCGTCATGTGTGGCGTAGTCGGTGCCCTGTCA…
129	CSZ0081	FRA	Snowfall	KJ878200		Berge et al., 2014	GAGGGCGCTGCCCCCGTCGAGCTGCCAATTCTGACCGGTACAGTGGGTCCGGACGTGATCGACGTACGCGGCCTGACCGCCACCGGCCGCTTCACATTTGACCCTGGTTTCATGTCCACGGCGTCTTGCGATTCGAAGATCACCTACATCGATGGTGACAATGGCATTCTGCTGCACCGCGGCTACCCGATCGAACAACTGGCCGAGCAGTCCGACTACCTCGAAACCTGCTACCTGCTGCTCAACGGCGAACTGCCCACCGCCGAGCAGAAAGCCCAGTTCGTGGCCGTGGTCAAGAACCACACGATGGTTCACGAGCAACTCAAGACCTTTTTCAACGGTTTCCGTCGCGACGCCCACCCGATGGCCGTCATGTGTGGCGTAGTCGGTGCCCTGTCA…
129	GAB0003	FRA	Biofilm	KJ878322		Berge et al., 2014	GAGGGCGCTGCCCCCGTCGAGCTGCCAATTCTGACCGGTACAGTGGGTCCGGACGTGATCGACGTACGCGGCCTGACCGCCACCGGCCGCTTCACATTTGACCCTGGTTTCATGTCCACGGCGTCTTGCGATTCGAAGATCACCTACATCGATGGTGACAATGGCATTCTGCTGCACCGCGGCTACCCGATCGAACAACTGGCCGAGCAGTCCGACTACCTCGAAACCTGCTACCTGCTGCTCAACGGCGAACTGCCCACCGCCGAGCAGAAAGCCCAGTTCGTGGCCGTGGTCAAGAACCACACGATGGTTCACGAGCAACTCAAGACCTTTTTCAACGGTTTCCGTCGCGACGCCCACCCGATGGCCGTCATGTGTGGCGTAGTCGGTGCCCTGTCA…
129	GAB0012	FRA	Biofilm	KJ878323		Berge et al., 2014	GAGGGCGCTGCCCCCGTCGAGCTGCCAATTCTGACCGGTACAGTGGGTCCGGACGTGATCGACGTACGCGGCCTGACCGCCACCGGCCGCTTCACATTTGACCCTGGTTTCATGTCCACGGCGTCTTGCGATTCGAAGATCACCTACATCGATGGTGACAATGGCATTCTGCTGCACCGCGGCTACCCGATCGAACAACTGGCCGAGCAGTCCGACTACCTCGAAACCTGCTACCTGCTGCTCAACGGCGAACTGCCCACCGCCGAGCAGAAAGCCCAGTTCGTGGCCGTGGTCAAGAACCACACGATGGTTCACGAGCAACTCAAGACCTTTTTCAACGGTTTCCGTCGCGACGCCCACCCGATGGCCGTCATGTGTGGCGTAGTCGGTGCCCTGTCA…
129	GAW0006	FRA	Irrigation_water	KJ878334		Berge et al., 2014	GGCGCTGCCCCCGTCGAGCTGCCAATTCTGACCGGTACAGTGGGTCCGGACGTGATCGACGTACGCGGCCTGACCGCCACCGGCCGCTTCACATTTGACCCTGGTTTCATGTCCACGGCGTCTTGCGATTCGAAGATCACCTACATCGATGGTGACAATGGCATTCTGCTGCACCGCGGCTACCCGATCGAACAACTGGCCGAGCAGTCCGACTACCTCGAAACCTGCTACCTGCTGCTCAACGGCGAACTGCCCACCGCCGAGCAGAAAGCCCAGTTCGTGGCCGTGGTCAAGAACCACACGATGGTTCACGAGCAACTCAAGACCTTTTTCAACGGTTTCCGTCGCGACGCCCACCCGATGGCCGTCATGTGTGGCGTAGTCGGTGCCCTGTCAGCG…
129	GAW0026	FRA	Irrigation_water	KJ878336		Berge et al., 2014	GAGGGCGCTGCCCCCGTCGAGCTGCCAATTCTGACCGGTACAGTGGGTCCGGACGTGATCGACGTACGCGGCCTGACCGCCACCGGCCGCTTCACATTTGACCCTGGTTTCATGTCCACGGCGTCTTGCGATTCGAAGATCACCTACATCGATGGTGACAATGGCATTCTGCTGCACCGCGGCTACCCGATCGAACAACTGGCCGAGCAGTCCGACTACCTCGAAACCTGCTACCTGCTGCTCAACGGCGAACTGCCCACCGCCGAGCAGAAAGCCCAGTTCGTGGCCGTGGTCAAGAACCACACGATGGTTCACGAGCAACTCAAGACCTTTTTCAACGGTTTCCGTCGCGACGCCCACCCGATGGCCGTCATGTGTGGCGTAGTCGGTGCCCTGTCA…
129	GAW0090	FRA	Irrigation_water	KJ878347		Berge et al., 2014	AGGGCGCTGCCCCCGTCGAGCTGCCAATTCTGACCGGTACAGTGGGTCCGGACGTGATCGACGTACGCGGCCTGACCGCCACCGGCCGCTTCACATTTGACCCTGGTTTCATGTCCACGGCGTCTTGCGATTCGAAGATCACCTACATCGATGGTGACAATGGCATTCTGCTGCACCGCGGCTACCCGATCGAACAACTGGCCGAGCAGTCCGACTACCTCGAAACCTGCTACCTGCTGCTCAACGGCGAACTGCCCACCGCCGAGCAGAAAGCCCAGTTCGTGGCCGTGGTCAAGAACCACACGATGGTTCACGAGCAACTCAAGACCTTTTTCAACGGTTTCCGTCGCGACGCCCACCCGATGGCCGTCATGTGTGGCGTAGTCGGTGCCCTGTCAG…
129	LNW0021	FRA	Irrigation_water	KJ878408		Berge et al., 2014	GGCGCTGCCCCCGTCGAGCTGCCAATTCTGACCGGTACAGTGGGTCCGGACGTGATCGACGTACGCGGCCTGACCGCCACCGGCCGCTTCACATTTGACCCTGGTTTCATGTCCACGGCGTCTTGCGATTCGAAGATCACCTACATCGATGGTGACAATGGCATTCTGCTGCACCGCGGCTACCCGATCGAACAACTGGCCGAGCAGTCCGACTACCTCGAAACCTGCTACCTGCTGCTCAACGGCGAACTGCCCACCGCCGAGCAGAAAGCCCAGTTCGTGGCCGTGGTCAAGAACCACACGATGGTTCACGAGCAACTCAAGACCTTTTTCAACGGTTTCCGTCGCGACGCCCACCCGATGGCCGTCATGTGTGGCGTAGTCGGTGCCCTGTCAGCG…
129	LNW0030	FRA	Irrigation_water	KJ878411		Berge et al., 2014	AGGGCGCTGCCCCCGTCGAGCTGCCAATTCTGACCGGTACAGTGGGTCCGGACGTGATCGACGTACGCGGCCTGACCGCCACCGGCCGCTTCACATTTGACCCTGGTTTCATGTCCACGGCGTCTTGCGATTCGAAGATCACCTACATCGATGGTGACAATGGCATTCTGCTGCACCGCGGCTACCCGATCGAACAACTGGCCGAGCAGTCCGACTACCTCGAAACCTGCTACCTGCTGCTCAACGGCGAACTGCCCACCGCCGAGCAGAAAGCCCAGTTCGTGGCCGTGGTCAAGAACCACACGATGGTTCACGAGCAACTCAAGACCTTTTTCAACGGTTTCCGTCGCGACGCCCACCCGATGGCCGTCATGTGTGGCGTAGTCGGTGCCCTGTCAG…
129	T3W0004	FRA	Groundwater	KJ878481		Berge et al., 2014	GAGGGCGCTGCCCCCGTCGAGCTGCCAATTCTGACCGGTACAGTGGGTCCGGACGTGATCGACGTACGCGGCCTGACCGCCACCGGCCGCTTCACATTTGACCCTGGTTTCATGTCCACGGCGTCTTGCGATTCGAAGATCACCTACATCGATGGTGACAATGGCATTCTGCTGCACCGCGGCTACCCGATCGAACAACTGGCCGAGCAGTCCGACTACCTCGAAACCTGCTACCTGCTGCTCAACGGCGAACTGCCCACCGCCGAGCAGAAAGCCCAGTTCGTGGCCGTGGTCAAGAACCACACGATGGTTCACGAGCAACTCAAGACCTTTTTCAACGGTTTCCGTCGCGACGCCCACCCGATGGCCGTCATGTGTGGCGTAGTCGGTGCCCTGTCA…
129	UB0303	FRA	Freshwater	AVDZ00000000		Berge et al., 2014	ATGGCTGACAAAAAAGCGCAGTTGATCATCGAGGGCGCTGCCCCCGTCGAGCTGCCAATTCTGACCGGTACAGTGGGTCCGGACGTGATCGACGTACGCGGCCTGACCGCCACCGGCCGCTTCACATTTGACCCTGGTTTCATGTCCACGGCGTCTTGCGATTCGAAGATCACCTACATCGATGGTGACAATGGCATTCTGCTGCACCGCGGCTACCCGATCGAACAACTGGCCGAGCAGTCCGACTACCTCGAAACCTGCTACCTGCTGCTCAACGGCGAACTGCCCACCGCCGAGCAGAAAGCCCAGTTCGTGGCCGTGGTCAAGAACCACACGATGGTTCACGAGCAACTCAAGACCTTTTTCAACGGTTTCCGTCGCGACGCCCACCCGATGGCC…
129	USA0096	USA	Freshwater	KJ878544		Berge et al., 2014	GATCGACGTACGCGGCCTGACCGCCACCGGCCGCTTCACATTTGACCCTGGTTTCATGTCCACGGCGTCTTGCGATTCGAAGATCACCTACATCGATGGTGACAATGGCATTCTGCTGCACCGCGGCTACCCGATCGAACAACTGGCCGAGCAGTCCGACTACCTCGAAACCTGCTACCTGCTGCTCAACGGCGAACTGCCCACCGCCGAGCAGAAAGCCCAGTTCGTGGCCGTGGTCAAGAACCACACGATGGTTCACGAGCAACTCAAGACCTTTTTCAACGGTTTCCGTCGCGACGCCCACCCGATGGCCGTCATGTGTGGCGTAGTCGGTGCCCTGTCAGCGTTCTACCACGACTCGCTGGACATCAATAACCCGCAGCACCGCGAGATTTCCGC…
129	USA0098	USA	Freshwater	KJ878545		Berge et al., 2014	GTGATCGACGTACGCGGCCTGACCGCCACCGGCCGCTTCACATTTGACCCTGGTTTCATGTCCACGGCGTCTTGCGATTCGAAGATCACCTACATCGATGGTGACAATGGCATTCTGCTGCACCGCGGCTACCCGATCGAACAACTGGCCGAGCAGTCCGACTACCTCGAAACCTGCTACCTGCTGCTCAACGGCGAACTGCCCACCGCCGAGCAGAAAGCCCAGTTCGTGGCCGTGGTCAAGAACCACACGATGGTTCACGAGCAACTCAAGACCTTTTTCAACGGTTTCCGTCGCGACGCCCACCCGATGGCCGTCATGTGTGGCGTAGTCGGTGCCCTGTCAGCGTTCTACCACGACTCGCTGGACATCAATAACCCGCAGCACCGCGAGATTTCC…
129	Vi0013	FRA	Freshwater	KJ878552		Berge et al., 2014	GTGATCGACGTACGCGGCCTGACCGCCACCGGCCGCTTCACATTTGACCCTGGTTTCATGTCCACGGCGTCTTGCGATTCGAAGATCACCTACATCGATGGTGACAATGGCATTCTGCTGCACCGCGGCTACCCGATCGAACAACTGGCCGAGCAGTCCGACTACCTCGAAACCTGCTACCTGCTGCTCAACGGCGAACTGCCCACCGCCGAGCAGAAAGCCCAGTTCGTGGCCGTGGTCAAGAACCACACGATGGTTCACGAGCAACTCAAGACCTTTTTCAACGGTTTCCGTCGCGACGCCCACCCGATGGCCGTCATGTGTGGCGTAGTCGGTGCCCTGTCAGCGTTCTACCACGACTCGCTGGACATCAATAACCCGCAGCACCGCGAGATTTCC…
129	5B530	USA	Plant	NA		Morris et al, 2000	CGACGTACGCGGCCTGACCGCCACCGGCCGCTTCACATTTGACCCTGGCTTCATGTCCACGGCCTCTTGCGATTCGAAGATCACCTACATCGATGGTGACAATGGCATTCTGCTGCACCGCGGCTACCCGATCGAACAACTGGCCGAGCAGTCCGACTACCTGGAAACCTGCTACCTGCTGCTCAACGGCGAACTGCCCACCGCCGAGCAGAAAGCCCAGTTCGTGGCCGTGGTCAAGAACCACACGATGGTTCACGAACAGCTCAAGACCTTTTTCAACGGTTTCCGCCGTGACGCCCACCCGATGGCCGTCATGTGTGGTGTAGTCGGCGCCCTGTCAGCGTTCTACCACGACTCCCTGGACATCAATAACCCGCAGCACCGCGAGATTTCCGCGGT…
130	0893_23	IND	Plant	AEAD00000000		Berge et al., 2014	ATGGCTGACAAAAAAGCGCAGTTGATCATCGAGGGCGCAGCCCCCGTCGAGCTGCCAATTCTGACCGGTACAGTGGGTCCGGACGTGATCGACGTACGCGGCCTGACCGCCACCGGCCGCTTCACATTTGACCCTGGCTTCATGTCCACGGCCTCTTGCGATTCGAAGATCACCTACATTGATGGTGACAATGGCATTCTGCTGCACCGCGGCTACCCGATCGAACAACTGGCCGAGCAGTCCGACTACCTCGAAACCTGCTACCTGCTGCTCAACGGCGAACTGCCGACCGCCGAACAGAAAGCCCAGTTCGTGGCCGTGGTCAAGAACCACACGATGGTTCACGAGCAACTCAAGACCTTCTTCAACGGCTTTCGTCGCGACGCCCACCCGATGGCC…
130	CFBP6109	JPN	Plant	LIIG00000000		https://cirm-cfbp.fr/	ATGGCTGACAAAAAAGCGCAGTTGATCATCGAGGGCGCAGCCCCCGTCGAGCTGCCAATTCTGACCGGTACAGTGGGTCCGGACGTGATCGACGTACGCGGCCTGACCGCCACCGGCCGCTTCACATTTGACCCTGGCTTCATGTCCACGGCCTCTTGCGATTCGAAGATCACCTACATTGATGGTGACAATGGCATTCTGCTGCACCGCGGCTACCCGATCGAACAACTGGCCGAGCAGTCCGACTACCTCGAAACCTGCTACCTGCTGCTCAACGGCGAACTGCCGACCGCCGAACAGAAAGCCCAGTTCGTGGCCGTGGTCAAGAACCACACGATGGTTCACGAGCAACTCAAGACCTTCTTCAACGGCTTTCGTCGCGACGCCCACCCGATGGCC…
131	1644	USA	Plant	AGAS00000000		Berge et al., 2014	TGCCCCCGTCGAGCTGCCAATTCTGACCGGTACAGTGGGTCCGGACGTGATCGACGTACGCGGCCTGACCGCCACCGGCCGCTTCACATTTGACCCTGGCTTCATGTCCACGGCCTCTTGCGATTCGAAGATCACCTACATTGATGGTGACAATGGCATTCTGCTGCACCGCGGCTACCCGATCGAACAACTGGCCGAGCAGTCCGATTACCTCGAAACCTGCTACCTGCTGCTCAACGGCGAACTGCCGACCGCCGAACAGAAAGCCCAGTTCGTGGCCGTGGTCAAGAACCACACGATGGTTCACGAGCAACTCAAGACCTTCTTCAACGGCTTTCGTCGCGACGCCCACCCGATGGCCGTCATGTGCGGCGTAGTCGGTGCCCTGTCAGCGTTCTA…
131	2708	MWI	Plant	NA		Berge et al., 2014	TGCCCCCGTCGAGCTGCCAATTCTGACCGGTACAGTGGGTCCGGACGTGATCGACGTACGCGGCCTGACCGCCACCGGCCGCTTCACATTTGACCCTGGCTTCATGTCCACGGCCTCTTGCGATTCGAAGATCACCTACATTGATGGTGACAATGGCATTCTGCTGCACCGCGGCTACCCGATCGAACAACTGGCCGAGCAGTCCGATTACCTCGAAACCTGCTACCTGCTGCTCAACGGCGAACTGCCGACCGCCGAACAGAAAGCCCAGTTCGTGGCCGTGGTCAAGAACCACACGATGGTTCACGAGCAACTCAAGACCTTCTTCAACGGCTTTCGTCGCGACGCCCACCCGATGGCCGTCATGTGCGGCGTAGTCGGTGCCTTGTCAGCGTTCTA…
131	ATCC11528	USA	Plant	AEAP00000000		Berge et al., 2014	ATGGCTGACAAAAAAGCGCAGTTGATCATCGAGGGCGCAGCCCCCGTCGAGCTGCCAATTCTGACCGGTACAGTGGGTCCGGACGTGATCGACGTACGCGGCCTGACCGCCACCGGCCGCTTCACATTTGACCCTGGCTTCATGTCCACGGCCTCTTGCGATTCGAAGATCACCTACATTGATGGTGACAATGGCATTCTGCTGCACCGCGGCTACCCGATCGAACAACTGGCCGAGCAGTCCGATTACCTCGAAACCTGCTACCTGCTGCTCAACGGCGAACTGCCGACCGCCGAACAGAAAGCCCAGTTCGTGGCCGTGGTCAAGAACCACACGATGGTTCACGAGCAACTCAAGACCTTCTTCAACGGCTTTCGTCGCGACGCCCACCCGATGGCC…
131	KOZ8101	JPN	Plant	NA	http://genome.ppws.vt.edu/cgi-bin/MLST/home.pl	Berge et al., 2014	CACCGGCCGCTTCACATTTGACCCTGGCTTCATGTCCACGGCCTCTTGCGATTCGAAGATCACCTACATTGATGGTGACAATGGCATTCTGCTGCACCGCGGCTACCCGATCGAACAACTGGCCGAGCAGTCCGATTACCTCGAAACCTGCTACCTGCTGCTCAACGGCGAACTGCCGACCGCCGAACAGAAAGCCCAGTTCGTGGCCGTGGTCAAGAACCACACGATGGTTCACGAGCAACTCAAGACCTTCTTCAACGGCTTTCGTCGCGACGCCCACCCGATGGCCGTCATGTGCGGCGTAGTCGGTGCCCTGTCAGCGTTCTACCACGACTCGCTGGACATCAATAACCCGCAGCACCGCGAGATTTCCGCTGTACGCCTGGTGGCCAAGATGCC…
131	LYR0002	FRA	Rain	KJ878415		Berge et al., 2014	GAGGGCGCTGCCCCCGTCGAGCTGCCAATTCTGACCGGTACAGTGGGTCCGGACGTGATCGACGTACGCGGCCTGACCGCCACCGGCCGCTTCACATTTGACCCTGGCTTCATGTCCACGGCCTCTTGCGATTCGAAGATCACCTACATTGATGGTGACAATGGCATTCTGCTGCACCGCGGCTACCCGATCGAACAACTGGCCGAGCAGTCCGATTACCTCGAAACCTGCTACCTGCTGCTCAACGGCGAACTGCCGACCGCCGAACAGAAAGCCCAGTTCGTGGCCGTGGTCAAGAACCACACGATGGTTCACGAGCAACTCAAGACCTTCTTCAACGGCTTTCGTCGCGACGCCCACCCGATGGCCGTCATGTGCGGCGTAGTCGGTGCCCTGTCA…
131	MAFF301020	JPN	Plant	AEAG00000000		Berge et al., 2014	ATGGCTGACAAAAAAGCGCAGTTGATCATCGAGGGCGCAGCCCCCGTCGAGCTGCCAATTCTGACCGGTACAGTGGGTCCGGACGTGATCGACGTACGCGGCCTGACCGCCACCGGCCGCTTCACATTTGACCCTGGCTTCATGTCCACGGCCTCTTGCGATTCGAAGATCACCTACATTGATGGTGACAATGGCATTCTGCTGCACCGCGGCTACCCGATCGAACAACTGGCCGAGCAGTCCGATTACCTCGAAACCTGCTACCTGCTGCTCAACGGCGAACTGCCGACCGCCGAACAGAAAGCCCAGTTCGTGGCCGTGGTCAAGAACCACACGATGGTTCACGAGCAACTCAAGACCTTCTTCAACGGCTTTCGTCGCGACGCCCACCCGATGGCC…
131	MAFF301315	JPN	Plant	AEAF00000000		Berge et al., 2014	ATGGCTGACAAAAAAGCGCAGTTGATCATCGAGGGCGCAGCCCCCGTCGAGCTGCCAATTCTGACCGGTACAGTGGGTCCGGACGTGATCGACGTACGCGGCCTGACCGCCACCGGCCGCTTCACATTTGACCCTGGCTTCATGTCCACGGCCTCTTGCGATTCGAAGATCACCTACATTGATGGTGACAATGGCATTCTGCTGCACCGCGGCTACCCGATCGAACAACTGGCCGAGCAGTCCGATTACCTCGAAACCAGCTACCTGCTGCTCAACGGCGAACTGCCGACCGCCGAACAGAAAGCCCAGTTCGTGGCCGTGGTCAAGAACCACACGATGGTTCACGAGCAACTCAAGACCTTCTTCAACGGCTTTCGTCGCGACGCCCACCCGATGGCC…
131	MAFF301765	JPN	Plant	NA	http://genome.ppws.vt.edu/cgi-bin/MLST/home.pl	Berge et al., 2014	CACCGGCCGCTTCACATTTGACCCTGGCTTCATGTCCACGGCCTCTTGCGATTCGAAGATCACCTACATTGATGGTGACAATGGCATTCTGCTGCACCGCGGCTACCCGATCGAACAACTGGCCGAGCAGTCCGATTACCTCGAAACCTGCTACCTGCTGCTCAACGGCGAACTGCCGACCGCCGAACAGAAAGCCCAGTTCGTGGCCGTGGTCAAGAACCACACGATGGTTCACGAGCAACTCAAGACCTTCTTCAACGGCTTTCGTCGCGACGCCCACCCGATGGCCGTCATGTGCGGCGTAGTCGGTGCCCTGTCAGCGTTCTACCACGACTCGCTGGACATCAATAACCCGCAGCACCGCGAGATTTCCGCTGTACGCCTGGTGGCCAAGATGCC…
131	MAFF302941	JPN	Plant	NA	http://genome.ppws.vt.edu/cgi-bin/MLST/home.pl	Berge et al., 2014	CACCGGCCGCTTCACATTTGACCCTGGCTTCATGTCCACGGCCTCTTGCGATTCGAAGATCACCTACATTGATGGTGACAATGGCATTCTGCTGCACCGCGGCTACCCGATCGAACAACTGGCCGAGCAGTCCGATTACCTCGAAACCTGCTACCTGTTGCTCAACGGCGAACTGCCGACCGCCGAACAGAAAGCCCAGTTCGTGGCCGTGGTCAAGAACCACACGATGGTTCACGAGCAACTCAAGACCTTCTTCAACGGCTTTCGTCGCGACGCCCACCCGATGGCCGTCATGTGCGGCGTAGTCGGTGCCCTGTCAGCGTTTTACCACGACTCGCTGGACATCAATAACCCGCAGCACCGCGAGATTTCCGCTGTACGCCTGGTGGCCAAGATGCC…
131	NCPPB3335	FRA	Plant	NA	http://genome.ppws.vt.edu/cgi-bin/MLST/home.pl	Berge et al., 2014	ATGGCTGACAAAAAAGCGCAGTTGATCATCGAGGGCGCAGCCCCCGTCGAGCTGCCAATTCTGACCGGTACAGTGGGTCCGGACGTGATCGACGTACGCGGCCTGACCGCCACCGGCCGCTTCACATTTGACCCTGGCTTCATGTCCACGGCCTCTTGCGATTCGAAGATCACCTACATTGATGGTGACAATGGCATTCTGCTGCACCGCGGCTACCCGATCGAACAACTGGCCGAGCAGTCCGATTACCTCGAAACCTGCTACCTGCTGCTCAACGGCGAACTGCCGACCGCCGAACAGAAAGCCCAGTTCGTGGCCGTGGTCAAGAACCACACGATGGTTCACGAGCAACTCAAGACCTTCTTCAACGGCTTTCGTCGCGACGCCCACCCGATGGCC…
131	Pph1448A	ETH	Plant	NA	http://genome.ppws.vt.edu/cgi-bin/MLST/home.pl	Berge et al., 2014	ATGGCTGACAAAAAAGCGCAGTTGATCATCGAGGGCGCAGCCCCCGTCGAGCTGCCAATTCTGACCGGTACAGTGGGTCCGGACGTGATCGACGTACGCGGCCTGACCGCCACCGGCCGCTTCACATTTGACCCTGGCTTCATGTCCACGGCCTCTTGCGATTCGAAGATCACCTACATTGATGGTGACAATGGCATTCTGCTGCACCGCGGCTACCCGATCGAACAACTGGCCGAGCAGTCCGATTACCTCGAAACCTGCTACCTGCTGCTCAACGGCGAACTGCCGACCGCCGAACAGAAAGCCCAGTTCGTGGCCGTGGTCAAGAACCACACGATGGTTCACGAGCAACTCAAGACCTTCTTCAACGGCTTTCGTCGCGACGCCCACCCGATGGCC…
131	PsavNEP	NPL	Plant	NA	http://genome.ppws.vt.edu/cgi-bin/MLST/home.pl	Berge et al., 2014	GCCCCCGTCGAGCTGCCAATTCTGACCGGTACAGTGGGTCCGGACGTGATCGACGTACGCGGCCTGACCGCCACCGGCCGCTTCACATTTGACCCTGGCTTCATGTCCACGGCCTCTTGCGATTCGAAGATCACCTACATTGATGGTGACAATGGCATTCTGCTGCACCGCGGCTACCCGATCGAACAACTGGCCGAGCAGTCCGATTACCTCGAAACCTGCTACCTGCTGCTCAACGGCGAACTGCCGACCGCCGAACAGAAAGCCCAGTTCGTGGCCGTGGTCAAGAACCACACGATGGTTCACGAGCAACTCAAGACCTTCTTCAACGGCTTTCGTCGCGACGCCCACCCGATGGCCGTCATGTGCGGCGTAGTCGGTGCCCTGTCAGCGTTCTAC…
131	PseHC_1	JPN	Plant	NA	http://genome.ppws.vt.edu/cgi-bin/MLST/home.pl	Berge et al., 2014	CACCGGCCGCTTCACATTTGACCCTGGCTTCATGTCCACGGCCTCTTGCGATTCGAAGATCACCTACATTGATGGTGACAATGGCATTCTGCTGCACCGCGGCTACCCGATCGAACAACTGGCCGAGCAGTCCGATTACCTCGAAACCTGCTACCTGCTGCTCAACGGCGAACTGCCGACCGTCGAACAGAAAGCCCAGTTCGTGGCCGTGGTCAAGAACCACACGATGGTTCACGAGCAACTCAAGACCTTCTTCAACGGCTTTCGTCGCGACGCCCACCCGATGGCCGTCATGTGCGGCGTAGTCGGTGCCCTGTCAGCGTTCTACCACGACTCGCTGGACATCAATAACCCGCAGCACCGCGAGATTTCCGCTGTACGCCTGGTGGCCAAGATGCC…
131	PseNE107	NPL	Plant	KJ878425		Berge et al., 2014	CACCGGCCGCTTCACATTTGACCCTGGCTTCATGTCCACGGCCTCTTGCGATTCGAAGATCACCTACATTGATGGTGACAATGGCATTCTGCTGCACCGCGGCTACCCGATCGAACAACTGGCCGAGCAGTCCGATTACCTCGAAACCTGCTACCTGCTGCTCAACGGCGAACTGCCGACCGCCGAACAGAAAGCCCAGTTCGTGGCCGTGGTCAAGAACCACACGATGGTTCACGAGCAACTCAAGACCTTCTTCAACGGCTTTCGTCGCGACGCCCACCCGATGGCCGTCATGTGCGGCGTAGTCGGTGCCCTGTCAGCGTTCTACCACGACTCGCTGGACATCAATAACCCGCAGCACCGCGAGATTTCCGCTGTACGCCTGGTGGCCAAGATGCC…
131	Pta6606	JPN	Plant	NA	http://genome.ppws.vt.edu/cgi-bin/MLST/home.pl	Berge et al., 2014	ATGGCTGACAAAAAAGCGCAGTTGATCATCGAGGGCGCAGCCCCCGTCGAGCTGCCAATTCTGACCGGTACAGTGGGTCCGGACGTGATCGACGTACGCGGCCTGACCGCCACCGGCCGCTTCACATTTGACCCTGGCTTCATGTCCACGGCCTCTTGCGATTCGAAGATCACCTACATTGATGGTGACAATGGCATTCTGCTGCACCGCGGCTACCCGATCGAACAACTGGCCGAGCAGTCCGATTACCTCGAAACCTGCTACCTGCTGCTCAACGGCGAACTGCCGACCGCCGAACAGAAAGCCCAGTTCGTGGCCGTGGTCAAGAACCACACGATGGTTCACGAGCAACTCAAGACCTTCTTCAACGGCTTTCGTCGCGACGCCCACCCGATGGCC…
131	R4_A29-2	USA	Plant	ADWY00000000		Berge et al., 2014	ATGGCTGACAAAAAAGCGCAGTTGATCATCGAGGGCGCAGCCCCCGTCGAGCTGCCAATTCTGACCGGTACAGTGGGTCCGGACGTGATCGACGTACGCGGCCTGACCGCCACCGGCCGCTTCACATTTGACCCTGGCTTCATGTCCACGGCCTCTTGCGATTCGAAGATCACCTACATTGATGGTGACAATGGCATTCTGCTGCACCGCGGCTACCCGATCGAACAACTGGCCGAGCAGTCCGATTACCTCGAAACCTGCTACCTGCTGCTCAACGGCGAACTGCCGACCGCCGAACAGAAAGCCCAGTTCGTGGCCGTGGTCAAGAACCACACGATGGTTCACGAGCAACTCAAGACCTTCTTCAACGGCTTTCGTCGCGACGCCCACCCGATGGCC…
131	CFBP3205	GRC	Plant	JYHB00000000		https://cirm-cfbp.fr/	ATGGCTGACAAAAAAGCGCAGTTGATCATCGAGGGCGCTGCTCCCGTCGAGCTGCCAATTCTGACCGGTACAGTGGGTCCGGACGTGATCGACGTACGCGGCCTGACCGCCACCGGCCGCTTCACATTTGACCCTGGCTTCATGTCCACGGCCTCTTGCGATTCGAAGATCACCTACATTGATGGTGACAATGGCATTCTGCTGCACCGCGGCTACCCGATCGAACAACTGGCCGAGCAGTCCGATTACCTCGAAACCTGCTACCTGCTGCTCAACGGCGAACTGCCGACCGCCGAACAGAAAGCCCAGTTCGTGGCCGTGGTCAAGAACCACACGATGGTTCACGAGCAACTCAAGACCTTCTTCAACGGCTTTCGTCGCGACGCCCACCCGATGGCC…
131	CFBP3226	JPN	Plant	JYHG00000000		https://cirm-cfbp.fr/	ATGGCTGACAAAAAAGCGCAGTTGATCATCGAGGGCGCAGCCCCCGTCGAGCTGCCAATTCTGACCGGTACAGTGGGTCCGGACGTGATCGACGTACGCGGCCTGACCGCCACCGGTCGCTTCACATTTGACCCTGGCTTCATGTCCACGGCCTCTTGCGATTCGAAGATCACCTACATTGATGGTGACAATGGCATTCTGCTGCACCGCGGCTACCCGATCGAACAACTGGCCGAGCAGTCCGATTACCTCGAAACCTGCTACCTGCTGCTCAACGGCGAACTGCCGACCGCCGAACAGAAAGCCCAGTTCGTGGCCGTGGTCAAGAACCACACGATGGTTCACGAGCAACTCAAGACCTTCTTCAACGGCTTTCGTCGCGACGCCCACCCGATGGCC…
131	ICMP7848	JPN	Plant	LJQJ00000000		https://scd.landcareresearch.co.nz/	ATGGCTGACAAAAAAGCGCAGTTGATCATCGAGGGCGCAGCCCCCGTCGAGCTGCCAATTCTGACCGGTACAGTGGGTCCGGACGTGATCGACGTACGCGGCCTGACCGCCACCGGCCGCTTCACATTTGACCCTGGCTTCATGTCCACGGCCTCTTGCGATTCGAAGATCACCTACATTGATGGTGACAATGGCATTCTGCTGCACCGCGGCTACCCGATCGAACAACTGGCCGAGCAGTCCGATTACCTCGAAACCTGCTACCTGCTGCTCAACGGCGAACTGCCGACCGCCGAACAGAAAGCCCAGTTCGTGGCCGTGGTCAAGAACCACACGATGGTTCACGAGCAACTCAAGACCTTCTTCAACGGCTTTCGTCGCGACGCCCACCCGATGGCC…
131	ICMP9151	JPN	Plant	LJRO00000000		https://scd.landcareresearch.co.nz/	ATGGCTGACAAAAAAGCGCAGTTGATCATCGAGGGCGCAGCCCCCGTCGAGCTGCCAATTCTGACCGGTACAGTGGGTCCGGACGTGATCGACGTACGCGGACTGACCGCCACCGGCCGCTTCACATTTGACCCTGGCTTCATGTCCACGGCATCTTGCGAGTCGAAGATCACCTACATCGATGGTGACAACGGAATCCTGCTTCACCGCGGCTACCCTATCGAACAACTGGCCGAGCAGTCCGATTACCTCGAAACCTGTTACCTGCTGCTCAACGGCGAATTGCCGACCGCCGAACAAAAAGCCCAGTTTGTGGCCGTGGTCAAGAACCACACGATGGTTCACGAGCAACTCAAGACATTTTTCAACGGCTTCCGCCGCGATGCCCACCCGATGGCC…
131	JFJ-0008	CHE	Snowfall	KY379249		Stopelli et al, 2017	ATGGCTGACAAAAAAGCGCAGTTGATCATCGAGGGCGCTGCCCCCGTCGAGCTGCCAATTCTGACGGGTACAGTCGGTCCGGACGTGATCGACGTACGCGGTCTTACCGCCACCGGCCGCTTCACATTTGACCCTGGCTTCATGTCCACGGCATCTTGCGAGTCGAAGATCACCTACATCGATGGTGATAACGGAATCCTGCTTCATCGCGGCTACCCGATCGAACAACTGGCCGAGCAGTCCGACTACCTGGAAACCTGCTACCTGCTGCTCAATGGCGAACTGCCAACTGCCGAGCAGAAAGCCCAGTTCGTCGCCGTGGTCAAGAACCACACGATGGTCCACGAACAGCTCAAGACCTTTTTCAACGGTTTTCGCCGTGATGCCCACCCGATGGCC…
132	1_6	JPN	Plant	ABZR00000000		Berge et al., 2014	ATGGCTGACAAAAAAGCGCAGTTGATCATCGAGGGCGCAGCCCCCGTCGAGCTGCCAATTCTGACCGGTACAGTGGGTCCGGACGTGATCGACGTACGCGGACTGACCGCCACCGGCCGCTTCACATTTGACCCTGGCTTCATGTCCACGGCATCTTGCGAGTCGAAGATCACCTACATCGATGGTGACAACGGAATCCTGCTTCACCGCGGCTACCCTATCGAACAACTGGCCGAGCAGTCCGATTACCTCGAAACCTGTTACCTGCTGCTCAACGGCGAATTGCCGACCGCCGAACAAAAAGCCCAGTTTGTGGCCGTGGTCAAGAACCACACGATGGTTCACGAGCAACTCAAGACATTTTTCAACGGCTTCCGCCGCGATGCCCACCCGATGGCC…
132	CC1629	USA	Plant	AVEE00000000		Berge et al., 2014	ATGGCTGACAAAAAAGCGCAGTTGATCATCGAGGGCGCAGCCCCCGTCGAGCTGCCAATTCTGACCGGTACAGTGGGTCCGGACGTGATCGACGTACGCGGACTGACCGCCACCGGCCGCTTCACATTTGACCCTGGCTTCATGTCCACGGCATCTTGCGAGTCGAAGATCACCTACATCGATGGTGACAACGGAATCCTGCTTCACCGCGGCTACCCTATCGAACAACTGGCCGAGCAGTCCGATTACCTCGAAACCTGTTACCTGCTGCTCAACGGCGAATTGCCGACCGCCGAACAAAAAGCCCAGTTTGTGGCCGTGGTCAAGAACCACACGATGGTTCACGAGCAACTCAAGACATTTTTCAACGGCTTCCGCCGCGATGCCCACCCGATGGCC…
132	CLA0282	FRA	Leaf_litter	KJ878130		Berge et al., 2014	TGATCGACGTACGCGGACTGACCGCCACCGGCCGCTTCACATTTGACCCTGGCTTCATGTCCACGGCATCTTGCGAGTCGAAGATCACCTACATCGATGGTGACAACGGAATCCTGCTTCACCGCGGCTACCCTATCGAACAACTGGCCGAGCAGTCCGATTACCTCGAAACCTGTTACCTGCTGCTCAACGGCGAATTGCCGACCGCCGAACAAAAAGCCCAGTTTGTGGCCGTGGTCAAGAACCACACGATGGTTCACGAGCAACTCAAGACATTTTTCAACGGCTTCCGCCGCGATGCCCACCCGATGGCCGTCATGTGCGGCGTAGTCGGCGCCCTTTCTGCGTTCTATCACGACTCGCTGGACATCAATAACCCGCAGCACCGCGAAATTTCGG…
132	KN221	JPN	Plant	NA	http://genome.ppws.vt.edu/cgi-bin/MLST/home.pl	Berge et al., 2014	CACCGGCCGCTTCACATTTGACCCTGGCTTCATGTCCACGGCATCTTGCGAGTCGAAGATCACCTACATCGATGGTGACAACGGAATCCTGCTTCACCGCGGCTACCCTATCGAACAACTGGCCGAGCAGTCCGATTACCTCGAAACCTGTTACCTGCTGCTCAACGGCGAATTGCCGACCGCCGAACAAAAAGCCCAGTTTGTGGCCGTGGTCAAGAACCACACGATGGTTCACGAGCAACTCAAGACATTTTTCAACGGCTTCCGCCGCGATGCCCACCCGATGGCCGTCATGTGCGGCGTAGTCGGCGCCCTTTCTGCGTTCTATCACGACTCGCTGGACATCAATAACCCGCAGCACCGCGAAATTTCGGCAGTGCGCCTGGTAGCCAAGATGCC…
132	LMG5060	GBR	Plant	JSED00000000		https://bccm.belspo.be/catalogues/lmg-catalogue-search	ATGGCTGACAAAAAAGCGCAGTTGATCATCGAGGGCGCAGCCCCCGTCGAGCTGCCAATTCTGACCGGTACAGTGGGTCCGGACGTGATCGACGTACGCGGACTGACCGCCACCGGCCGCTTCACATTTGACCCTGGCTTCATGTCCACGGCATCTTGCGAGTCGAAGATCACCTACATCGATGGTGACAACGGAATCCTGCTTCACCGCGGCTACCCTATCGAACAACTGGCCGAGCAGTCCGATTACCTCGAAACCTGTTACCTGCTGCTCAACGGCGAATTGCCGACCGCCGAACAAAAAGCCCAGTTTGTGGCCGTGGTCAAGAACCACACGATGGTTCACGAGCAACTCAAGACATTTTTCAACGGCTTCCGCCGCGATGCCCACCCGATGGCC…
132	ICMP9855	JPN	Plant	AOKB00000000		https://scd.landcareresearch.co.nz/	CCCGTCGAGCTGCCAATACTGACCGGTACAGTGGGTCCGGACGTGATCGACGTACGCGGTCTGACCGCCACCGGCCGCTTCACATTTGACCCTGGTTTCATGTCCACGGCCTCTTGCGAGTCGAAGATCACCTACATCGATGGTGACAACGGAATTCTGCTGCACCGCGGCTACCCGATCGAACAACTGGCCGAGCAGTCCGATTATCTCGAGACCTGCTACCTGTTGCTCAACGGCGAGCTGCCAACCGCCGAACAGAAAGCCCAGTTCGTGGCCGTGGTCAAGAACCATACGATGGTTCACGAACAACTCAAGACCTTCTTCAACGGCTTTCGCCGTGACGCCCACCCGATGGCCGTCATGTGCGGTGTAGTCGGCGCCCTGTCGGCGTTCTACCAC…
133	CC1513	FRA	Plant	AVEL00000000		Berge et al., 2014	ATGGCTGACAAAAAAGCGCAGTTGATCATCGAGGGCGCAGCCCCCGTCGAGCTGCCAATTCTGACCGGTACAGTGGGTCCGGACGTGATCGACGTACGCGGACTGACCGCCACCGGCCGCTTCACATTTGACCCTGGCTTCATGTCCACGGCATCTTGCGAGTCGAAGATCACCTACATCGATGGTGACAATGGAATCCTGCTTCACCGCGGCTACCCTATCGAACAACTGGCCGAGCAGTCCGATTACCTCGAAACCTGTTACCTGCTGCTCAACGGCGAATTGCCCACCGCCGAACAGAAAGCCCAGTTTGTGGCCGTGGTCAAGAACCACACGATGGTTCACGAGCAACTCAAGACATTTTTCAACGGCTTCCGCCGCGATGCCCACCCGATGGCC…
133	CLA0212	FRA	Snowpack	KJ878121		Berge et al., 2014	TACGCGGACTGACCGCCACCGGCCGCTTCACATTTGACCCTGGCTTCATGTCCACGGCATCTTGCGAGTCGAAGATCACCTACATCGATGGTGACAATGGAATCCTGCTTCACCGCGGCTACCCTATCGAACAACTGGCCGAGCAGTCCGATTACCTCGAAACCTGTTACCTGCTGCTCAACGGCGAATTGCCCACCGCCGAACAGAAAGCCCAGTTTGTGGCCGTGGTCAAGAACCACACGATGGTTCACGAGCAACTCAAGACATTTTTCAACGGCTTCCGCCGCGATGCCCACCCGATGGCCGTCATGTGCGGCGTAGTCGGCGCCCTTTCTGCGTTCTATCACGACTCGCTGGACATCAATAACCCGCAGCACCGCGAAATTTCGGCAGTGCGCC…
134	AI0009	NZL	Freshwater	KJ877806		Berge et al., 2014	CCGGTAAGTGGGTCCGGACGTGATCGACGTACGCGGTCTGACCGCCACCGGCCGCTTCACATTTGACCCTGGCTTCATGTCCACGGCCTCTTGCGAGTCGAAGATCACCTACATTGATGGTGACAACGGAATTCTGCTGCACCGCGGCTACCCGATCGAACAACTGGCCGAGCAGTCCGATTACCTCGAGACCTGCTACCTGTTGCTCAACGGCGAGCTGCCAACCGCCGAACAGAAAGCCCAGTTCGTGGCCGTGGTCAAGAACCACACGATGGTTCACGAACAACTCAAGACCTTCTTCAACGGCTTTCGCCGTGACGCCCACCCGATGGCCGTCATGTGCGGTGTAGTCGGCGCCCTGTCGGCGTTCTACCACGATTCGCTGGACATCAATAACCC…
134	AI0047	NZL	Freshwater	KJ877817		Berge et al., 2014	CATACTGACCGGTACAGTGGGTCCGGACGTGATCGACGTACGCGGTCTGACCGCCACCGGCCGCTTCACATTTGACCCTGGCTTCATGTCCACGGCCTCTTGCGAGTCGAAGATCACCTACATTGATGGTGACAACGGAATTCTGCTGCACCGCGGCTACCCGATCGAACAACTGGCCGAGCAGTCCGATTACCTCGAGACCTGCTACCTGTTGCTCAACGGCGAGCTGCCAACCGCCGAACAGAAAGCCCAGTTCGTGGCCGTGGTCAAGAACCACACGATGGTTCACGAACAACTCAAGACCTTCTTCAACGGCTTTCGCCGTGACGCCCACCCGATGGCCGTCATGTGCGGTGTAGTCGGCGCCCTGTCGGCGTTCTACCACGATTCGCTGGACAT…
134	AI0074	NZL	Freshwater	KJ877824		Berge et al., 2014	CTCATACTGACCGGTACAGTGGGTCCGGACGTGATCGACGTACGCGGTCTGACCGCCACCGGCCGCTTCACATTTGACCCTGGCTTCATGTCCACGGCCTCTTGCGAGTCGAAGATCACCTACATTGATGGTGACAACGGAATTCTGCTGCACCGCGGCTACCCGATCGAACAACTGGCCGAGCAGTCCGATTACCTCGAGACCTGCTACCTGTTGCTCAACGGCGAGCTGCCAACCGCCGAACAGAAAGCCCAGTTCGTGGCCGTGGTCAAGAACCACACGATGGTTCACGAACAACTCAAGACCTTCTTCAACGGCTTTCGCCGTGACGCCCACCCGATGGCCGTCATGTGCGGTGTAGTCGGCGCCCTGTCGGCGTTCTACCACGATTCGCTGGAC…
134	AI0082	NZL	Freshwater	KJ877827		Berge et al., 2014	TCATACTGACCGGTACAGTGGGTCCGGACGTGATCGACGTACGCGGTCTGACCGCCACCGGCCGCTTCACATTTGACCCTGGCTTCATGTCCACGGCCTCTTGCGAGTCGAAGATCACCTACATTGATGGTGACAACGGAATTCTGCTGCACCGCGGCTACCCGATCGAACAACTGGCCGAGCAGTCCGATTACCTCGAGACCTGCTACCTGTTGCTCAACGGCGAGCTGCCAACCGCCGAACAGAAAGCCCAGTTCGTGGCCGTGGTCAAGAACCACACGATGGTTCACGAACAACTCAAGACCTTCTTCAACGGCTTTCGCCGTGACGCCCACCCGATGGCCGTCATGTGCGGTGTAGTCGGCGCCCTGTCGGCGTTCTACCACGATTCGCTGGACA…
134	AI0086	NZL	Freshwater	KJ877830		Berge et al., 2014	ATTCTGACCGGTACAGTGGGTCCGGACGTGATCGACGTACGCGGTCTCACCGCCACCGGCCGCTTCACATTCGACCCTGGCTTCATGTCGACCGCCTCTTGCGAGTCGAAGATCACCTACATCGATGGTGACAACGGAATCCTGCTGCACCGCGGCTACCCTATCGAACAACTGGCCCAGCACTCCGACTACCTGGAGACCTGCTACCTGCTGCTCAACGGCGAACTGCCAACCGCCGAGCAGAAAGCCCAGTTCGTCGCCGTGGTCAAGAACCACACGATGGTCCACGAACAGCTCAAGACCTTTTTCAATGGCTTCCGTCGCGACGCCCACCCGATGGCCGTCATGTGCGGCGTGGTCGGCGCCCTTTCAGCGTTCTATCACGACTCGCTGGACATC…
134	CMO0017	FRA	Rain	KJ878146		Berge et al., 2014	GCGCTGCCCCCGTCGAGCTGCCAATACTGACCGGTACAGTGGGTCCGGACGTGATCGACGTACGCGGTCTGACCGCCACCGGCCGCTTCACATTTGACCCTGGCTTCATGTCCACGGCCTCTTGCGAGTCGAAGATCACCTACATTGATGGTGACAACGGAATTCTGCTGCACCGCGGCTACCCGATCGAACAACTGGCCGAGCAGTCCGATTACCTCGAGACCTGCTACCTGTTGCTCAACGGCGAGCTGCCAACCGCCGAACAGAAAGCCCAGTTCGTGGCCGTGGTCAAGAACCACACGATGGTTCACGAACAACTCAAGACCTTCTTCAACGGCTTTCGCCGTGACGCCCACCCGATGGCCGTCATGTGCGGTGTAGTCGGCGCCCTGTCGGCGT…
134	CST0094	FRA	Rain	KJ878196		Berge et al., 2014	GGGCGCTGCCCCCGTCGAGCTGCCAATACTGACCGGTACAGTGGGTCCGGACGTGATCGACGTACGCGGTCTGACCGCCACCGGCCGCTTCACATTTGACCCTGGCTTCATGTCCACGGCCTCTTGCGAGTCGAAGATCACCTACATTGATGGTGACAACGGAATTCTGCTGCACCGCGGCTACCCGATCGAACAACTGGCCGAGCAGTCCGATTACCTCGAGACCTGCTACCTGTTGCTCAACGGCGAGCTGCCAACCGCCGAACAGAAAGCCCAGTTCGTGGCCGTGGTCAAGAACCACACGATGGTTCACGAACAACTCAAGACCTTCTTCAACGGCTTTCGCCGTGACGCCCACCCGATGGCCGTCATGTGCGGTGTAGTCGGCGCCCTGTCGGC…
134	DC3000	GBR	Plant	NC_004578		Berge et al., 2014	ATGGCTGACAAAAAAGCGCAGTTGATCATCGAGGGCGCTGCCCCCGTCGAGCTGCCAATACTGACCGGTACAGTGGGTCCGGACGTGATCGACGTACGCGGTCTGACCGCCACCGGCCGCTTCACATTTGACCCTGGCTTCATGTCCACGGCCTCTTGCGAGTCGAAGATCACCTACATTGATGGTGACAACGGAATTCTGCTGCACCGCGGCTACCCGATCGAACAACTGGCCGAGCAGTCCGATTACCTCGAGACCTGCTACCTGTTGCTCAACGGCGAGCTGCCAACCGCCGAACAGAAAGCCCAGTTCGTGGCCGTGGTCAAGAACCACACGATGGTTCACGAACAACTCAAGACCTTCTTCAACGGCTTTCGCCGTGACGCCCACCCGATGGCC…
134	GAW0236	FRA	Irrigation_water	KJ878365		Berge et al., 2014	GAGGGCGCTGCCCCCGTCGAGCTGCCAATACTGACCGGTACAGTGGGTCCGGACGTGATCGACGTACGCGGTCTGACCGCCACCGGCCGCTTCACATTTGACCCTGGCTTCATGTCCACGGCCTCTTGCGAGTCGAAGATCACCTACATTGATGGTGACAACGGAATTCTGCTGCACCGCGGCTACCCGATCGAACAACTGGCCGAGCAGTCCGATTACCTCGAGACCTGCTACCTGTTGCTCAACGGCGAGCTGCCAACCGCCGAACAGAAAGCCCAGTTCGTGGCCGTGGTCAAGAACCACACGATGGTTCACGAACAACTCAAGACCTTCTTCAACGGCTTTCGCCGTGACGCCCACCCGATGGCCGTCATGTGCGGTGTAGTCGGCGCCCTGTCG…
134	KN203	JPN	Plant	NA	http://genome.ppws.vt.edu/cgi-bin/MLST/home.pl	Berge et al., 2014	CACCGGCCGCTTCACATTTGACCCTGGCTTCATGTCCACGGCCTCTTGCGAGTCGAAGATCACCTACATTGATGGTGACAACGGAATTCTGCTGCACCGCGGCTACCCGATCGAACAACTGGCCGAGCAGTCCGATTACCTCGAGACCTGCTACCTGTTGCTCAACGGCGAGCTGCCAACCGCCGAACAGAAAGCCCAGTTCGTGGCCGTGGTCAAGAACCACACGATGGTTCACGAACAACTCAAGACCTTCTTCAACGGCTTTCGCCGTGACGCCCACCCGATGGCCGTCATGTGCGGTGTAGTCGGCGCCCTGTCGGCGTTCTACCACGATTCGCTGGACATCAATAACCCGCAGCACCGCGAAATTTCGGCTGTACGCCTGGTCGCCAAGATGCC…
134	M302278PT	USA	Plant	AEAM00000000		Berge et al., 2014	ATGGCTGACAAAAAAGCGCAGTTGATCATCGAGGGCGCTGCCCCCGTCGAGCTGCCAATACTGACCGGTACAGTGGGTCCGGACGTGATCGACGTACGCGGTCTGACCGCCACCGGCCGCTTCACATTTGACCCTGGCTTCATGTCCACGGCCTCTTGCGAGTCGAAGATCACCTACATTGATGGTGACAACGGAATTCTGCTGCACCGCGGCTACCCGATCGAACAACTGGCCGAGCAGTCCGATTACCTCGAGACCTGCTACCTGTTGCTCAACGGCGAGCTGCCAACCGCCGAACAGAAAGCCCAGTTCGTGGCCGTGGTCAAGAACCACACGATGGTTCACGAACAACTCAAGACCTTCTTCAACGGCTTTCGCCGTGACGCCCACCCGATGGCC…
134	SZB0006	FRA	Biofilm	KJ878465		Berge et al., 2014	GAGGGCGCTGCCCCCGTCGAGCTGCCAATACTGACCGGTACAGTGGGTCCGGACGTGATCGACGTACGCGGTCTGACCGCCACCGGCCGCTTCACATTTGACCCTGGCTTCATGTCCACGGCCTCTTGCGAGTCGAAGATCACCTACATTGATGGTGACAACGGAATTCTGCTGCACCGCGGCTACCCGATCGAACAACTGGCCGAGCAGTCCGATTACCTCGAGACCTGCTACCTGTTGCTCAACGGCGAGCTGCCAACCGCCGAACAGAAAGCCCAGTTCGTGGCCGTGGTCAAGAACCACACGATGGTTCACGAACAACTCAAGACCTTCTTCAACGGCTTTCGCCGTGACGCCCACCCGATGGCCGTCATGTGCGGTGTAGTCGGCGCCCTGTCG…
134	SZB0015	FRA	Biofilm	KJ878469		Berge et al., 2014	GAGGGCGCTGCCCCCGTCGAGCTGCCAATACTGACCGGTACAGTGGGTCCGGACGTGATCGACGTACGCGGTCTGACCGCCACCGGCCGCTTCACATTTGACCCTGGCTTCATGTCCACGGCCTCTTGCGAGTCGAAGATCACCTACATTGATGGTGACAACGGAATTCTGCTGCACCGCGGCTACCCGATCGAACAACTGGCCGAGCAGTCCGATTACCTCGAGACCTGCTACCTGTTGCTCAACGGCGAGCTGCCAACCGCCGAACAGAAAGCCCAGTTCGTGGCCGTGGTCAAGAACCACACGATGGTTCACGAACAACTCAAGACCTTCTTCAACGGCTTTCGCCGTGACGCCCACCCGATGGCCGTCATGTGCGGTGTAGTCGGCGCCCTGTCG…
134	CFBP2212	GBR	Plant	KF937499		https://cirm-cfbp.fr/	GTACGCGGTCTGACCGCCACCGGCCGCTTCACATTTGACCCTGGCTTCATGTCCACGGCCTCTTGCGAGTCGAAGATCACCTACATTGATGGTGACAACGGAATTCTGCTGCACCGCGGCTACCCGATCGAACAACTGGCCGAGCAGTCCGATTACCTCGAGACCTGCTACCTGTTGCTCAACGGCGAGCTGCCAACCGCCGAACAGAAAGCCCAGTTCGTGGCCGTGGTCAAGAACCACACGATGGTTCACGAACAACTCAAGACCTTCTTCAACGGCTTTCGCCGTGACGCCCACCCGATGGCCGTCATGTGCGGTGTAGTCGGCGCCCTGTCGGCGTTCTACCACGATTCGCTGGACATCAATAACCCGCAGCACCGCGAAATTTCGGCTGTACGC…
134	CFBP3846	FRA	Plant	LIIJ01000000		https://cirm-cfbp.fr/	ATGGCTGACAAAAAAGCGCAGTTGATCATCGAGGGCGCTGCCCCCGTCGAGCTGCCAATACTGACCGGTACAGTGGGTCCGGACGTGATCGACGTACGCGGTCTGACCGCCACCGGCCGCTTCACATTTGACCCTGGCTTCATGTCCACGGCCTCTTGCGAGTCGAAGATCACCTACATTGATGGTGACAACGGAATTCTGCTGCACCGCGGCTACCCGATCGAACAACTGGCCGAGCAGTCCGATTACCTCGAGACCTGCTACCTGTTGCTCAACGGCGAGCTGCCAACCGCCGAACAGAAAGCCCAGTTCGTGGCCGTGGTCAAGAACCACACGATGGTTCACGAACAACTCAAGACCTTCTTCAACGGCTTTCGCCGTGACGCCCACCCGATGGCC…
134	NCPPB2254	FRA	Plant	ODAM00000000		Ruinelli et al, 2019	ATGGCTGACAAAAAAGCGCAGTTGATCATCGAGGGCGCTGCCCCCGTCGAGCTGCCAATACTGACCGGTACAGTGGGTCCGGACGTGATCGACGTACGCGGTCTGACCGCCACCGGCCGCTTCACATTTGACCCTGGCTTCATGTCCACGGCCTCTTGCGAGTCGAAGATCACCTACATTGATGGTGACAACGGAATTCTGCTGCACCGCGGCTACCCGATCGAACAACTGGCCGAGCAGTCCGATTACCTCGAGACCTGCTACCTGTTGCTCAACGGCGAGCTGCCAACCGCCGAACAGAAAGCCCAGTTCGTGGCCGTGGTCAAGAACCACACGATGGTTCACGAACAACTCAAGACCTTCTTCAACGGCTTTCGCCGTGACGCCCACCCGATGGCC…
135	CSZ0848	FRA	Leaf_litter	KJ878284		Berge et al., 2014	GAGGGCGCTGCCCCCGTCGAGCTGCCAATACTGACCGGTACAGTGGGTCCGGACGTGATCGACGTACGCGGTCTGACCGCCACCGGCCGCTTCACATTTGACCCTGGCTTCATGTCCACGGCCTCTTGCGAGTCGAAGATCACCTACATTGATGGTGACAACGGAATTCTGCTGCACCGCGGCTACCCGATCGAACAACTGGCCGAGCAGTCCGATTACCTCGAGACCTGCTACCTGCTGCTCAACGGCGAGCTGCCAACCGCCGAACAGAAGGCCCAGTTCGTGGCCGTGGTCAAGAACCACACGATGGTTCACGAACAACTCAAGACCTTCTTCAACGGCTTTCGCCGTGACGCCCACCCGATGGCCGTCATGTGCGGTGTAGTTGGCGCCCTGTCG…
135	T1	CAN	Plant	NA	http://genome.ppws.vt.edu/cgi-bin/MLST/home.pl	Berge et al., 2014	ATGGCTGACAAAAAAGCGCAGTTGATCATCGAGGGCGCTGCCCCCGTCGAGCTGCCAATACTGACCGGTACAGTGGGTCCGGACGTGATCGACGTACGCGGTCTGACCGCCACCGGCCGCTTCACATTTGACCCTGGCTTCATGTCCACGGCCTCTTGCGAGTCGAAGATCACCTACATTGATGGTGACAACGGAATTCTGCTGCACCGCGGCTACCCGATCGAACAACTGGCCGAGCAGTCCGATTACCTCGAGACCTGCTACCTGCTGCTCAACGGCGAGCTGCCAACCGCCGAACAGAAGGCCCAGTTCGTGGCCGTGGTCAAGAACCACACGATGGTTCACGAACAACTCAAGACCTTCTTCAACGGCTTTCGCCGTGACGCCCACCCGATGGCC…
136	CC1594	FRA	Rain	KJ877903		Berge et al., 2014	GAGGGCGCTGCCCCCGTCGAGCTGCCAATACTGACCGGTACAGTGGGTCCGGACGTGATCGACGTACGCGGTCTGACCGCCACCGGCCGCTTCACATTTGACCCTGGCTTCATGTCCACGGCCTCTTGCGAGTCGAAGATCACCTACATTGATGGTGACAACGGAATTCTGCTGCACCGCGGCTACCCGATCGAACAACTGGCCGAGCAGTCCGATTACCTCGAGACCTGCTACCTGCTGCTCAACGGCGAGCTGCCAACCGCCGAACAGAAAGCCCAGTTCGTGGCCGTGGTCAAGAACCACACGATGGTTCACGAACAACTCAAGACCTTCTTCAACGGCTTTCGCCGTGACGCCCACCCGATGGCCGTCATGTGCGGTGTAGTTGGCGCCCTGTCG…
136	CC1630	USA	Plant	AVED00000000		Berge et al., 2014	ATGGCTGACAAAAAAGCGCAGTTGATCATCGAGGGCGCTGCCCCCGTCGAGCTGCCAATACTGACCGGTACAGTGGGTCCGGACGTGATCGACGTACGCGGTCTGACCGCCACCGGCCGCTTCACATTTGACCCTGGCTTCATGTCCACGGCCTCTTGCGAGTCGAAGATCACCTACATTGATGGTGACAACGGAATTCTGCTGCACCGCGGCTACCCGATCGAACAACTGGCCGAGCAGTCCGATTACCTCGAGACCTGCTACCTGCTGCTCAACGGCGAGCTGCCAACCGCCGAACAGAAAGCCCAGTTCGTGGCCGTGGTCAAGAACCACACGATGGTTCACGAACAACTCAAGACCTTCTTCAACGGCTTTCGCCGTGACGCCCACCCGATGGCC…
136	CCV0502	FRA	Leaf_litter	KJ878083		Berge et al., 2014	TGATCGACGTACGCGGTCTGACCGCCACCGGCCGCTTCACATTTGACCCTGGCTTCATGTCCACGGCCTCTTGCGAGTCGAAGATCACCTACATTGATGGTGACAACGGAATTCTGCTGCACCGCGGCTACCCGATCGAACAACTGGCCGAGCAGTCCGATTACCTCGAGACCTGCTACCTGCTGCTCAACGGCGAGCTGCCAACCGCCGAACAGAAAGCCCAGTTCGTGGCCGTGGTCAAGAACCACACGATGGTTCACGAACAACTCAAGACCTTCTTCAACGGCTTTCGCCGTGACGCCCACCCGATGGCCGTCATGTGCGGTGTAGTTGGCGCCCTGTCGGCGTTCTACCACGATTCGCTGGACATCAATAACCCGCAGCACCGCGAAATTTCGG…
136	CMO0050	FRA	Rain	KJ878149		Berge et al., 2014	GGCGCTGCCCCCGTCGAGCTGCCAATACTGACCGGTACAGTGGGTCCGGACGTGATCGACGTACGCGGCCTGACCGCCACCGGCCGCTTCACATTTGACCCTGGCTTCATGTCCACGGCCTCTTGCGAGTCGAAGATCACCTACATTGATGGTGACAACGGAATTCTGCTGCACCGCGGCTACCCGATCGAACAACTGGCCGAGCAGTCCGATTACCTCGAGACCTGCTACCTGCTGCTCAACGGCGAGCTGCCAACCGCCGAACAGAAAGCCCAGTTCGTGGCCGTGGTCAAGAACCACACGATGGTTCACGAACAACTCAAGACCTTCTTCAACGGCTTTCGCCGTGACGCCCACCCGATGGCCGTCATGTGCGGTGTAGTTGGCGCCCTGTCGGCG…
136	CST0002	FRA	Rain	KJ878179		Berge et al., 2014	GAGGGCGCTGCCCCCGTCGAGCTGCCAATACTGACCGGTACAGTGGGTCCGGACGTGATCGACGTACGCGGTCTGACCGCCACCGGCCGCTTCACATTTGACCCTGGCTTCATGTCCACGGCCTCTTGCGAGTCGAAGATCACCTACATTGATGGTGACAACGGAATTCTGCTGCACCGCGGCTACCCGATCGAACAACTGGCCGAGCAGTCCGATTACCTCGAGACCTGCTACCTGCTGCTCAACGGCGAGCTGCCAACCGCCGAACAGAAAGCCCAGTTCGTGGCCGTGGTCAAGAACCACACGATGGTTCACGAACAACTCAAGACCTTCTTCAACGGCTTTCGCCGTGACGCCCACCCGATGGCCGTCATGTGCGGTGTAGTTGGCGCCCTGTCG…
136	CSZ0259	FRA	Freshwater	KJ878221		Berge et al., 2014	GGCGCTGCCCCCGTCGAGCTGCCAATACTGACCGGTACAGTGGGTCCGGACGTGATCGACGTACGCGGTCTGACCGCCACCGGCCGCTTCACATTTGACCCTGGCTTCATGTCCACGGCCTCTTGCGAGTCGAAGATCACCTACATTGATGGTGACAACGGAATTCTGCTGCACCGCGGCTACCCGATCGAACAACTGGCCGAGCAGTCCGATTACCTCGAGACCTGCTACCTGCTGCTCAACGGCGAGCTGCCAACCGCCGAACAGAAAGCCCAGTTCGTGGCCGTGGTCAAGAACCACACGATGGTTCACGAACAACTCAAGACCTTCTTCAACGGCTTTCGCCGTGACGCCCACCCGATGGCCGTCATGTGCGGTGTAGTTGGCGCCCTGTCGGCG…
136	CSZ0292	FRA	Snowpack	KJ878233		Berge et al., 2014	GAGGGCGCTGCCCCCGTCGAGCTGCCAATACTGACCGGTACAGTGGGTCCGGACGTGATCGACGTACGCGGTCTGACCGCCACCGGCCGCTTCACATTTGACCCTGGCTTCATGTCCACGGCCTCTTGCGAGTCGAAGATCACCTACATTGATGGTGACAACGGAATTCTGCTGCACCGCGGCTACCCGATCGAACAACTGGCCGAGCAGTCCGATTACCTCGAGACCTGCTACCTGCTGCTCAACGGCGAGCTGCCAACCGCCGAACAGAAAGCCCAGTTCGTGGCCGTGGTCAAGAACCACACGATGGTTCACGAACAACTCAAGACCTTCTTCAACGGCTTTCGCCGTGACGCCCACCCGATGGCCGTCATGTGCGGTGTAGTTGGCGCCCTGTCG…
136	CSZ0326	FRA	Snowpack	KJ878250		Berge et al., 2014	GAGGGCGCTGCCCCCGTCGAGCTGCCAATACTGACCGGTACAGTGGGTCCGGACGTGATCGACGTACGCGGTCTGACCGCCACCGGCCGCTTCACATTTGACCCTGGCTTCATGTCCACGGCCTCTTGCGAGTCGAAGATCACCTACATTGATGGTGACAACGGAATTCTGCTGCACCGCGGCTACCCGATCGAACAACTGGCCGAGCAGTCCGATTACCTCGAGACCTGCTACCTGCTGCTCAACGGCGAGCTGCCAACCGCCGAACAGAAAGCCCAGTTCGTGGCCGTGGTCAAGAACCACACGATGGTTCACGAACAACTCAAGACCTTCTTCAACGGCTTTCGCCGTGACGCCCACCCGATGGCCGTCATGTGCGGTGTAGTTGGCGCCCTGTCG…
136	CSZ0908	FRA	Snowpack	KJ878293		Berge et al., 2014	GACGTACGCGGTCTGACCGCCACCGGCCGCTTCACATTTGACCCTGGCTTCATGTCCACGGCCTCTTGCGAGTCGAAGATCACCTACATTGATGGTGACAACGGAATTCTGCTGCACCGCGGCTACCCGATCGAACAACTGGCCGAGCAGTCCGATTACCTCGAGACCTGCTACCTGCTGCTCAACGGCGAGCTGCCAACCGCCGAACAGAAAGCCCAGTTCGTGGCCGTGGTCAAGAACCACACGATGGTTCACGAACAACTCAAGACCTTCTTCAACGGCTTTCGCCGTGACGCCCACCCGATGGCCGTCATGTGCGGTGTAGTTGGCGCCCTGTCGGCGTTCTACCACGATTCGCTGGACATCAATAACCCGCAGCACCGCGAAATTTCGGCTGTA…
136	KG0004	ITA	Plant	KJ878372		Berge et al., 2014	GCCCCCGTCGAGCTGCCAATACTGACCGGTACAGTGGGTCCGGACGTGATCGACGTACGCGGCCTGACCGCCACCGGCCGCTTCACATTTGACCCTGGCTTCATGTCCACGGCCTCTTGCGAGTCGAAGATCACCTACATTGATGGTGACAACGGAATTCTGCTGCACCGCGGCTACCCGATCGAACAACTGGCCGAGCAGTCCGATTACCTCGAGACCTGCTACCTGCTGCTCAACGGCGAGCTGCCAACCGCCGAACAGAAAGCCCAGTTCGTGGCCGTGGTCAAGAACCACACGATGGTTCACGAACAACTCAAGACCTTCTTCAACGGCTTTCGCCGTGACGCCCACCCGATGGCCGTCATGTGCGGTGTAGTTGGCGCCCTGTCGGCGTTCTAC…
136	LAB0041	FRA	Biofilm	KJ878383		Berge et al., 2014	GAGGGCGCTGCCCCCGTCGAGCTGCCAATACTGACCGGTACAGTGGGTCCGGACGTGATCGACGTACGCGGTCTGACCGCCACCGGCCGCTTCACATTTGACCCTGGCTTCATGTCCACGGCCTCTTGCGAGTCGAAGATCACCTACATTGATGGTGACAACGGAATTCTGCTGCACCGCGGCTACCCGATCGAACAACTGGCCGAGCAGTCCGATTACCTCGAGACCTGCTACCTGCTGCTCAACGGCGAGCTGCCAACCGCCGAACAGAAAGCCCAGTTCGTGGCCGTGGTCAAGAACCACACGATGGTTCACGAACAACTCAAGACCTTCTTCAACGGCTTTCGCCGTGACGCCCACCCGATGGCCGTCATGTGCGGTGTAGTTGGCGCCCTGTCG…
136	SZ0014	FRA	Freshwater	KJ878435		Berge et al., 2014	TCGACGTACGCGGTCTGACCGCCACCGGCCGCTTCACATTTGACCCTGGCTTCATGTCCACGGCCTCTTGCGAGTCGAAGATCACCTACATTGATGGTGACAACGGAATTCTGCTGCACCGCGGCTACCCGATCGAACAACTGGCCGAGCAGTCCGATTACCTCGAGACCTGCTACCTGCTGCTCAACGGCGAGCTGCCAACCGCCGAACAGAAAGCCCAGTTCGTGGCCGTGGTCAAGAACCACACGATGGTTCACGAACAACTCAAGACCTTCTTCAACGGCTTTCGCCGTGACGCCCACCCGATGGCCGTCATGTGCGGTGTAGTTGGCGCCCTGTCGGCGTTCTACCACGATTCGCTGGACATCAATAACCCGCAGCACCGCGAAATTTCGGCTG…
137	CCV0611	FRA	Snowpack	KJ878090		Berge et al., 2014	TGATCGACGTACGCGGCCTGACCGCCACCGGCCGCTTCACATTTGACCCTGGCTTCATGTCCACGGCCTCTTGCGAGTCGAAGATCACCTACATTGATGGTGACAACGGAATTCTGCTGCACCGCGGCTACCCGATCGAACAACTGGCCGAGCAGTCCGATTACCTCGAGACCTGCTACCTGCTGCTCAACGGCGAGCTGCCAACCGCCGAACAGAAAGCCCAGTTCGTGGCCGTGGTCAAGAACCACACGATGGTTCACGAACAACTCAAGACCTTCTTCAACGGCTTTCGCCGTGACGCCCACCCGATGGCCGTCATGTGCGGTGTAGTCGGCGCCCTGTCGGCGTTCTACCACGATTCGCTCGACATCAATAACCCGCAGCACCGCGAAATTTCGG…
137	CLA0235	FRA	Snowpack	KJ878125		Berge et al., 2014	CGCTGCCCCCGTCGAGCTGCCAATACTGACCGGTACAGTGGGTCCGGACGTGATCGACGTACGCGGTCTGACCGCCACCGGCCGCTTCACATTTGACCCTGGCTTCATGTCCACGGCCTCTTGCGAGTCGAAGATCACCTACATTGATGGTGACAACGGAATTCTGCTGCACCGCGGCTACCCGATCGAACAACTGGCCGAGCAGTCCGATTACCTCGAGACCTGCTACCTGCTGCTCAACGGCGAGCTGCCAACCGCCGAACAGAAAGCCCAGTTCGTGGCCGTGGTCAAGAACCACACGATGGTTCACGAACAACTCAAGACCTTCTTCAACGGCTTTCGCCGTGACGCCCACCCGATGGCCGTCATGTGCGGTGTAGTCGGCGCCCTGTCGGCGTT…
137	CMO0002	FRA	Rain	KJ878143		Berge et al., 2014	GAGGGCGCTGCCCCCGTCGAGCTGCCAATACTGACCGGTACAGTGGGTCCGGACGTGATCGACGTACGCGGTCTGACCGCCACCGGCCGCTTCACATTTGACCCTGGCTTCATGTCCACGGCCTCTTGCGAGTCGAAGATCACCTACATTGATGGTGACAACGGAATTCTGCTGCACCGCGGCTACCCGATCGAACAACTGGCCGAGCAGTCCGATTACCTCGAGACCTGCTACCTGCTGCTCAACGGCGAGCTGCCAACCGCCGAACAGAAAGCCCAGTTCGTGGCCGTGGTCAAGAACCACACGATGGTTCACGAACAACTCAAGACCTTCTTCAACGGCTTTCGCCGTGACGCCCACCCGATGGCCGTCATGTGCGGTGTAGTCGGCGCCCTGTCG…
137	CMW0036	FRA	Freshwater	KJ878171		Berge et al., 2014	GAGGGCGCTGCCCCCGTCGAGCTGCCAATACTGACCGGTACAGTGGGTCCGGACGTGATCGACGTACGCGGTCTGACCGCCACCGGCCGCTTCACATTTGACCCTGGCTTCATGTCCACGGCCTCTTGCGAGTCGAAGATCACCTACATTGATGGTGACAACGGAATTCTGCTGCACCGCGGCTACCCGATCGAACAACTGGCCGAGCAGTCCGATTACCTCGAGACCTGCTACCTGCTGCTCAACGGCGAGCTGCCAACCGCCGAACAGAAAGCCCAGTTCGTGGCCGTGGTCAAGAACCACACGATGGTTCACGAACAACTCAAGACCTTCTTCAACGGCTTTCGCCGTGACGCCCACCCGATGGCCGTCATGTGCGGTGTAGTCGGCGCCCTGTCG…
137	CSZ0223	FRA	Freshwater	KJ878215		Berge et al., 2014	GCCCCCGTCGAGCTGCCAATACTGACCGGTACAGTGGGTCCGGACGTGATCGACGTACGCGGTCTGACCGCCACCGGCCGCTTCACATTTGACCCTGGCTTCATGTCCACGGCCTCTTGCGAGTCGAAGATCACCTACATTGATGGTGACAACGGAATTCTGCTGCACCGCGGCTACCCGATCGAACAACTGGCCGAGCAGTCCGATTACCTCGAGACCTGCTACCTGCTGCTCAACGGCGAGCTGCCAACCGCCGAACAGAAAGCCCAGTTCGTGGCCGTGGTCAAGAACCACACGATGGTTCACGAACAACTCAAGACCTTCTTCAACGGCTTTCGCCGTGACGCCCACCCGATGGCCGTCATGTGCGGTGTAGTCGGCGCCCTGTCGGCGTTCTAC…
137	CSZ0279	FRA	Snowpack	KJ878223		Berge et al., 2014	GTGCTGCCCCCGTCGAGCTGCCAATACTGACCGGTACAGTGGGTCCGGACGTGATCGACGTACGCGGTCTGACCGCCACCGGCCGCTTCACATTTGACCCTGGCTTCATGTCCACGGCCTCTTGCGAGTCGAAGATCACCTACATTGATGGTGACAACGGAATTCTGCTGCACCGCGGCTACCCGATCGAACAACTGGCCGAGCAGTCCGATTACCTCGAGACCTGCTACCTGCTGCTCAACGGCGAGCTGCCAACCGCCGAACAGAAAGCCCAGTTCGTGGCCGTGGTCAAGAACCACACGATGGTTCACGAACAACTCAAGACCTTCTTCAACGGCTTTCGCCGTGACGCCCACCCGATGGCCGTCATGTGCGGTGTAGTCGGCGCCCTGTCGGCGT…
137	GAW0231	FRA	Irrigation_water	KJ878363		Berge et al., 2014	GAGGGCGCTGCCCCCGTCGAGCTGCCAATACTGACCGGTACAGTGGGTCCGGACGTGATCGACGTACGCGGTCTGACCGCCACCGGCCGCTTCACATTTGACCCTGGCTTCATGTCCACGGCCTCTTGCGAGTCGAAGATCACCTACATTGATGGTGACAACGGAATTCTGCTGCACCGCGGCTACCCGATCGAACAACTGGCCGAGCAGTCCGATTACCTCGAGACCTGCTACCTGCTGCTCAACGGCGAGCTGCCAACCGCCGAACAGAAAGCCCAGTTCGTGGCCGTGGTCAAGAACCACACGATGGTTCACGAACAACTCAAGACCTTCTTCAACGGCTTTCGCCGTGACGCCCACCCGATGGCCGTCATGTGCGGTGTAGTCGGCGCCCTGTCG…
137	LAB0040	FRA	Biofilm	KJ878382		Berge et al., 2014	GAGGGCGCTGCCCCCGTCGAGCTGCCAATACTGACCGGTACAGTGGGTCCGGACGTGATCGACGTACGCGGTCTGACCGCCACCGGCCGCTTCACATTTGACCCTGGCTTCATGTCCACGGCCTCTTGCGAGTCGAAGATCACCTACATTGATGGTGACAACGGAATTCTGCTGCACCGCGGCTACCCGATCGAACAACTGGCCGAGCAGTCCGATTACCTCGAGACCTGCTACCTGCTGCTCAACGGCGAGCTGCCAACCGCCGAACAGAAAGCCCAGTTCGTGGCCGTGGTCAAGAACCACACGATGGTTCACGAACAACTCAAGACCTTCTTCAACGGCTTTCGCCGTGACGCCCACCCGATGGCCGTCATGTGCGGTGTAGTCGGCGCCCTGTCG…
137	LAB0076	FRA	Biofilm	KJ878387		Berge et al., 2014	GAGGGCGCTGCCCCCGTCGAGCTGCCAATACTGACCGGTACAGTGGGTCCGGACGTGATCGACGTACGCGGTCTGACCGCCACCGGCCGCTTCACATTTGACCCTGGCTTCATGTCCACGGCCTCTTGCGAGTCGAAGATCACCTACATTGATGGTGACAACGGAATTCTGCTGCACCGCGGCTACCCGATCGAACAACTGGCCGAGCAGTCCGATTACCTCGAGACCTGCTACCTGCTGCTCAACGGCGAGCTGCCAACCGCCGAACAGAAAGCCCAGTTCGTGGCCGTGGTCAAGAACCACACGATGGTTCACGAACAACTCAAGACCTTCTTCAACGGCTTTCGCCGTGACGCCCACCCGATGGCCGTCATGTGCGGTGTAGTCGGCGCCCTGTCG…
137	SZ0149	FRA	Plant	KJ878460		Berge et al., 2014	CGTGATCGACGTACGCGGTCTGACCGCCACCGGCCGCTTCACATTTGACCCTGGCTTCATGTCCACGGCCTCTTGCGAGTCGAAGATCACCTACATTGATGGTGACAACGGAATTCTGCTGCACCGCGGCTACCCGATCGAACAACTGGCCGAGCAGTCCGATTACCTCGAGACCTGCTACCTGCTGCTCAACGGCGAGCTGCCAACCGCCGAACAGAAAGCCCAGTTCGTGGCCGTGGTCAAGAACCACACGATGGTTCACGAACAACTCAAGACCTTCTTCAACGGCTTTCGCCGTGACGCCCACCCGATGGCCGTCATGTGCGGTGTAGTCGGCGCCCTGTCGGCGTTCTACCACGATTCGCTGGACATCAATAACCCGCAGCACCGCGAAATTTC…
137	SZB0003	FRA	Biofilm	KJ878462		Berge et al., 2014	GAGGGCGCTGCCCCCGTCGAGCTGCCAATACTGACCGGTACAGTGGGTCCGGACGTGATCGACGTACGCGGTCTGACCGCCACCGGCCGCTTCACATTTGACCCTGGCTTCATGTCCACGGCCTCTTGCGAGTCGAAGATCACCTACATTGATGGTGACAACGGAATTCTGCTGCACCGCGGCTACCCGATCGAACAACTGGCCGAGCAGTCCGATTACCTCGAGACCTGCTACCTGCTGCTCAACGGCGAGCTGCCAACCGCCGAACAGAAAGCCCAGTTCGTGGCCGTGGTCAAGAACCACACGATGGTTCACGAACAACTCAAGACCTTCTTCAACGGCTTTCGCCGTGACGCCCACCCGATGGCCGTCATGTGCGGTGTAGTCGGCGCCCTGTCG…
138	CCV0461	FRA	Snowpack	KJ878080		Berge et al., 2014	GCGCTGCCCCCGTCGAGCTGCCAATACTGACCGGTACAGTGGGTCCGGACGTGATCGACGTACGCGGTCTGACCGCCACCGGCCGCTTCACATTTGACCCTGGCTTCATGTCCACGGCCTCTTGCGAGTCGAAGATCACCTACATTGATGGTGACAACGGAATTCTGCTGCACCGCGGCTACCCGATCGAACAACTGGCCGAGCAGTCCGATTACCTCGAGACCTGCTACCTGCTGCTCAACGGCGAGCTGCCAACCGCCGAACAGAAAGCCCAGTTCGTGGCCGTGGTCAAGAACCACACGATGGTTCACGAACAACTCAAGACCTTCTTCAACGGCTTTCGCCGTGACGCCCACCCGATGGCCGTCATGTGTGGTGTAGTCGGCGCCCTGTCGGCGT…
138	CCV0467	FRA	Snowpack	KJ878081		Berge et al., 2014	GAGGGCGCTGCCCCCGTCGAGCTGCCAATACTGACCGGTACAGTGGGTCCGGACGTGATCGACGTACGCGGTCTGACCGCCACCGGCCGCTTCACATTTGACCCTGGCTTCATGTCCACGGCCTCTTGCGAGTCGAAGATCACCTACATTGATGGTGACAACGGAATTCTGCTGCACCGCGGCTACCCGATCGAACAACTGGCCGAGCAGTCCGATTACCTCGAGACCTGCTACCTGCTGCTCAACGGCGAGCTGCCAACCGCCGAACAGAAAGCCCAGTTCGTGGCCGTGGTCAAGAACCACACGATGGTTCACGAACAACTCAAGACCTTCTTCAACGGCTTTCGCCGTGACGCCCACCCGATGGCCGTCATGTGTGGTGTAGTCGGCGCCCTGTCG…
138	CCV0491	FRA	Leaf_litter	KJ878082		Berge et al., 2014	GATCGACGTACGCGGTCTGACCGCCACCGGCCGCTTCACATTTGACCCTGGCTTCATGTCCACGGCCTCTTGCGAGTCGAAGATCACCTACATTGATGGTGACAACGGAATTCTGCTGCACCGCGGCTACCCGATCGAACAACTGGCCGAGCAGTCCGATTACCTCGAGACCTGCTACCTGCTGCTCAACGGCGAGCTGCCAACCGCCGAACAGAAAGCCCAGTTCGTGGCCGTGGTCAAGAACCACACGATGGTTCACGAACAACTCAAGACCTTCTTCAACGGCTTTCGCCGTGACGCCCACCCGATGGCCGTCATGTGTGGTGTAGTCGGCGCCCTGTCGGCGTTCTACCACGATTCGCTCGACATCAATAACCCGCAGCACCGCGAAATTTCGGC…
138	LAB0129	FRA	Biofilm	KJ878396		Berge et al., 2014	GGGCGCTGCCCCCGTCGAGCTGCCAATACTGACCGGTACAGTGGGTCCGGACGTGATCGACGTACGCGGTCTGACCGCCACCGGCCGCTTCACATTTGACCCTGGCTTCATGTCCACGGCCTCTTGCGAGTCGAAGATCACCTACATTGATGGTGACAACGGAATTCTGCTGCACCGCGGCTACCCGATCGAACAACTGGCCGAGCAGTCCGATTACCTCGAGACCTGCTACCTGCTGCTCAACGGCGAGCTGCCAACCGCCGAACAGAAAGCCCAGTTCGTGGCCGTGGTCAAGAACCACACGATGGTTCACGAACAACTCAAGACCTTCTTCAACGGCTTTCGCCGTGACGCCCACCCGATGGCCGTCATGTGTGGTGTAGTCGGCGCCCTGTCGGC…
138	SZ0015	FRA	Freshwater	KJ878436		Berge et al., 2014	GATCGACGTACGCGGTCTGACCGCCACCGGCCGCTTCACATTTGACCCTGGCTTCATGTCCACGGCCTCTTGCGAGTCGAAGATCACCTACATTGATGGTGACAACGGAATTCTGCTGCACCGCGGCTACCCGATCGAACAACTGGCCGAGCAGTCCGATTACCTCGAGACCTGCTACCTGCTGCTCAACGGCGAGCTGCCAACCGCCGAACAGAAAGCCCAGTTCGTGGCCGTGGTCAAGAACCACACGATGGTTCACGAACAACTCAAGACCTTCTTCAACGGCTTTCGCCGTGACGCCCACCCGATGGCCGTCATGTGTGGTGTAGTCGGCGCCCTGTCGGCGTTCTACCACGATTCGCTCGACATCAATAACCCGCAGCACCGCGAAATTTCGGC…
138	SZ0049	FRA	Freshwater	KJ878443		Berge et al., 2014	GATCGACGTACGCGGTCTGACCGCCACCGGCCGCTTCACATTTGACCCTGGCTTCATGTCCACGGCCTCTTGCGAGTCGAAGATCACCTACATTGATGGTGACAACGGAATTCTGCTGCACCGCGGCTACCCGATCGAACAACTGGCCGAGCAGTCCGATTACCTCGAGACCTGCTACCTGCTGCTCAACGGCGAGCTGCCAACCGCCGAACAGAAAGCCCAGTTCGTGGCCGTGGTCAAGAACCACACGATGGTTCACGAACAACTCAAGACCTTCTTCAACGGCTTTCGCCGTGACGCCCACCCGATGGCCGTCATGTGTGGTGTAGTCGGCGCCCTGTCGGCGTTCTACCACGATTCGCTCGACATCAATAACCCGCAGCACCGCGAAATTTCGGC…
138	SZ0120	FRA	Freshwater	KJ878453		Berge et al., 2014	GTGATCGACGTACGCGGTCTGACCGCCACCGGCCGCTTCACATTTGACCCTGGCTTCATGTCCACGGCCTCTTGCGAGTCGAAGATCACCTACATTGATGGTGACAACGGAATTCTGCTGCACCGCGGCTACCCGATCGAACAACTGGCCGAGCAGTCCGATTACCTCGAGACCTGCTACCTGCTGCTCAACGGCGAGCTGCCAACCGCCGAACAGAAAGCCCAGTTCGTGGCCGTGGTCAAGAACCACACGATGGTTCACGAACAACTCAAGACCTTCTTCAACGGCTTTCGCCGTGACGCCCACCCGATGGCCGTCATGTGTGGTGTAGTCGGCGCCCTGTCGGCGTTCTACCACGATTCGCTCGACATCAATAACCCGCAGCACCGCGAAATTTCG…
138	SZ0134	FRA	Freshwater	KJ878458		Berge et al., 2014	GTGATCGACGTACGCGGTCTGACCGCCACCGGCCGCTTCACATTTGACCCTGGCTTCATGTCCACGGCCTCTTGCGAGTCGAAGATCACCTACATTGATGGTGACAACGGAATTCTGCTGCACCGCGGCTACCCGATCGAACAACTGGCCGAGCAGTCCGATTACCTCGAGACCTGCTACCTGCTGCTCAACGGCGAGCTGCCAACCGCCGAACAGAAAGCCCAGTTCGTGGCCGTGGTCAAGAACCACACGATGGTTCACGAACAACTCAAGACCTTCTTCAACGGCTTTCGCCGTGACGCCCACCCGATGGCCGTCATGTGTGGTGTAGTCGGCGCCCTGTCGGCGTTCTACCACGATTCGCTCGACATCAATAACCCGCAGCACCGCGAAATTTCG…
138	SZB0007	FRA	Biofilm	KJ878466		Berge et al., 2014	CACCGGCCGCTTCACATTTGACCCTGGCTTCATGTCCACGGCCTCTTGCGAGTCGAAGATCACCTACATTGATGGTGACAACGGAATTCTGCTGCACCGCGGCTACCCGATCGAACAACTGGCCGAGCAGTCCGATTACCTCGAGACCTGCTACCTGCTGCTCAACGGCGAGCTGCCAACCGCCGAACAGAAAGCCCAGTTCGTGGCCGTGGTCAAGAACCACACGATGGTTCACGAACAACTCAAGACCTTCTTCAACGGCTTTCGCCGTGACGCCCACCCGATGGCCGTCATGTGTGGTGTAGTCGGCGCCCTGTCGGCGTTCTACCACGATTCGCTCGACATCAATAACCCGCAGCACCGCGAAATTTCGGCTGTACGCCTGGTCGCCAAGATGCC…
138	SZB0069	FRA	Biofilm	KJ878476		Berge et al., 2014	GAGGGCGCTGCCCCCGTCGAGCTGCCAATACTGACCGGTACAGTGGGTCCGGACGTGATCGACGTACGCGGTCTGACCGCCACCGGCCGCTTCACATTTGACCCTGGCTTCATGTCCACGGCCTCTTGCGAGTCGAAGATCACCTACATTGATGGTGACAACGGAATTCTGCTGCACCGCGGCTACCCGATCGAACAACTGGCCGAGCAGTCCGATTACCTCGAGACCTGCTACCTGCTGCTCAACGGCGAGCTGCCAACCGCCGAACAGAAAGCCCAGTTCGTGGCCGTGGTCAAGAACCACACGATGGTTCACGAACAACTCAAGACCTTCTTCAACGGCTTTCGCCGTGACGCCCACCCGATGGCCGTCATGTGTGGTGTAGTCGGCGCCCTGTCG…
139	AF0007	NZL	Freshwater	KJ877801		Berge et al., 2014	CGACGTACGCGGTCTGACCGCCACCGGCCGCTTCACATTTGACCCTGGTTTCATGTCCACGGCCTCTTGCGAGTCGAAGATCACCTACATCGATGGTGACAACGGAATTCTGCTGCACCGCGGCTACCCGATCGAACAACTGGCCGAGCAGTCCGATTACCTCGAGACCTGCTACCTGTTGCTCAACGGCGAGCTGCCAACCGCCGAACAGAAAGCCCAGTTCGTGGCCGTGGTCAAGAACCACACAATGGTTCACGAACAACTCAAGACCTTCTTCAACGGCTTTCGCCGTGACGCCCACCCGATGGCCGTCATGTGCGGTGTAGTCGGCGCCCTGTCGGCGTTCTACCACGATTCGCTCGACATCAATAACCCGCAGCACCGCGAAATTTCGGCTGT…
139	CCE0245	FRA	Freshwater	KJ877969		Berge et al., 2014	GCCCCCGTCGAGCTGCCAATACTGACCGGTACAGTGGGTCCGGACGTGATCGACGTACGCGGTCTGACCGCCACCGGCCGCTTCACATTTGACCCTGGTTTCATGTCCACGGCCTCTTGCGAGTCGAAGATCACCTACATCGATGGTGACAACGGAATTCTGCTGCACCGCGGCTACCCGATCGAACAACTGGCCGAGCAGTCCGATTACCTCGAGACCTGCTACCTGTTGCTCAACGGCGAGCTGCCAACCGCCGAACAGAAAGCCCAGTTCGTGGCCGTGGTCAAGAACCACACAATGGTTCACGAACAACTCAAGACCTTCTTCAACGGCTTTCGCCGTGACGCCCACCCGATGGCCGTCATGTGCGGTGTAGTCGGCGCCCTGTCGGCGTTCTAC…
139	CEB0020	FRA	Biofilm	KJ878097		Berge et al., 2014	GAGGGCGCTGCCCCCGTCGAGCTGCCAATACTGACCGGTACAGTGGGCCCGGACGTGATCGACGTACGCGGTCTGACCGCCACCGGCCGCTTCACATTTGACCCTGGTTTCATGTCCACGGCCTCTTGCGAGTCGAAGATCACCTACATCGATGGTGACAACGGAATTCTGCTGCACCGCGGCTACCCGATCGAACAACTGGCCGAGCAGTCCGATTACCTCGAGACCTGCTACCTGTTGCTCAACGGCGAGCTGCCAACCGCCGAACAGAAAGCCCAGTTCGTGGCCGTGGTCAAGAACCACACAATGGTTCACGAACAACTCAAGACCTTCTTCAACGGCTTTCGCCGTGACGCCCACCCGATGGCCGTCATGTGCGGTGTAGTCGGCGCCCTGTCG…
139	CSZ0174	FRA	Freshwater	KJ878206		Berge et al., 2014	GCCCCCGTCGAGCTGCCAATACTGACCGGTACAGTGGGTCCGGACGTGATCGACGTACGCGGTCTGACCGCCACCGGCCGCTTCACATTTGACCCTGGTTTCATGTCCACGGCCTCTTGCGAGTCGAAGATCACCTACATCGATGGTGACAACGGAATTCTGCTGCACCGCGGCTACCCGATCGAACAACTGGCCGAGCAGTCCGATTACCTCGAGACCTGCTACCTGTTGCTCAACGGCGAGCTGCCAACCGCCGAACAGAAAGCCCAGTTCGTGGCCGTGGTCAAGAACCACACAATGGTTCACGAACAACTCAAGACCTTCTTCAACGGCTTTCGCCGTGACGCCCACCCGATGGCCGTCATGTGCGGTGTAGTCGGCGCCCTGTCGGCGTTCTAC…
139	CSZ0761	FRA	Snowpack	KJ878277		Berge et al., 2014	GGCGCTGCCCCCGTCGAGCTGCCAATACTGACCGGTACAGTGGGCCCGGACGTGATCGACGTACGCGGTCTGACCGCCACCGGCCGCTTCACATTTGACCCTGGTTTCATGTCCACGGCCTCTTGCGAGTCGAAGATCACCTACATCGATGGTGACAACGGAATTCTGCTGCACCGCGGCTACCCGATCGAACAACTGGCCGAGCAGTCCGATTACCTCGAGACCTGCTACCTGTTGCTCAACGGCGAGCTGCCAACCGCCGAACAGAAAGCCCAGTTCGTGGCCGTGGTCAAGAACCACACAATGGTTCACGAACAACTCAAGACCTTCTTCAACGGCTTTCGCCGTGACGCCCACCCGATGGCCGTCATGTGCGGTGTAGTCGGCGCCCTGTCGGCG…
139	SZ0129	FRA	Freshwater	KJ878456		Berge et al., 2014	ACGTACGCGGTCTGACCGCCACCGGCCGCTTCACATTTGACCCTGGTTTCATGTCCACGGCCTCTTGCGAGTCGAAGATCACCTACATCGATGGTGACAACGGAATTCTGCTGCACCGCGGCTACCCGATCGAACAACTGGCCGAGCAGTCCGATTACCTCGAGACCTGCTACCTGTTGCTCAACGGCGAGCTGCCAACCGCCGAACAGAAAGCCCAGTTCGTGGCCGTGGTCAAGAACCACACAATGGTTCACGAACAACTCAAGACCTTCTTCAACGGCTTTCGCCGTGACGCCCACCCGATGGCCGTCATGTGCGGTGTAGTCGGCGCCCTGTCGGCGTTCTACCACGATTCGCTCGACATCAATAACCCGCAGCACCGCGAAATTTCGGCTGTAC…
139	USA0007	USA	Freshwater	AVDY00000000		Berge et al., 2014	GAGGGCGCTGCCCCCGTCGAGCTGCCAATACTGACCGGTACAGTGGGTCCGGACGTGATCGACGTACGCGGTCTGACCGCCACCGGCCGCTTCACATTTGACCCTGGTTTCATGTCCACGGCCTCTTGCGAGTCGAAGATCACCTACATCGATGGTGACAACGGAATTCTGCTGCACCGCGGCTACCCGATCGAACAACTGGCCGAGCAGTCCGATTACCTCGAGACCTGCTACCTGTTGCTCAACGGCGAGCTGCCAACCGCCGAACAGAAAGCCCAGTTCGTGGCCGTGGTCAAGAACCACACAATGGTTCACGAACAACTCAAGACCTTCTTCAACGGCTTTCGCCGTGACGCCCACCCGATGGCCGTCATGTGCGGTGTAGTCGGCGCCCTGTCG…
139	JFJ-0045	CHE	Snowfall	KY379255		Stopelli et al, 2017	GGGCGCTGCCCCCGTCGAGCTGCCAATTCTGACCGGTACAGTGGGTCCGGACGTGATCGACGTACGCGGCCTGACCGCCACCGGCCGCTTCACATTTGACCCTGGTTTCATGTCCACGGCGTCTTGCGATTCGAAGATCACCTACATCGATGGTGACAATGGCATTCTGCTGCACCGCGGCTACCCGATCGAACAACTGGCCGAGCAGTCCGACTACCTCGAAACCTGCTACCTGCTGCTCAACGGCGAACTGCCCACCGCCGAGCAGAAAGCCCAGTTCGTGGCCGTGGTCAAGAACCACACGATGGTTCACGAGCAACTCAAGACCTTTTTCAACGGTTTCCGTCGCGACGCCCACCCGATGGCCGTCATGTGTGGCGTAGTCGGTGCCCTGTCAGC…
140	CSZ0956	FRA	Freshwater	KJ878294		Berge et al., 2014	GCCCCCGTCGAGCTGCCAATACTGACCGGTACAGTGGGCCCGGACGTGATCGACGTACGCGGTCTGACCGCCACCGGCCGCTTCACATTTGACCCTGGTTTCATGTCCACGGCCTCTTGCGAGTCGAAGATCACCTACATCGATGGTGACAACGGAATTCTGCTGCACCGCGGCTACCCGATCGAACAACTGGCCGAGCAGTCCGATTACCTCGAGACCTGCTACCTGTTGCTCAACGGCGAGCTGCCAACCGCCGAACAGAAAGCCCAGTTCGTGGCCGTGGTCAAGAACCACACAATGGTTCACGAACAACTCAAGACCTTCTTCAACGGCTTTCGCCGTGACGCCCACCCGATGGCCGTCATGTGCGGTGTAGTCGGAGCCCTGTCGGCGTTCTAC…
140	SZB0061	FRA	Biofilm	KJ878474		Berge et al., 2014	AGGGCGCTGCCCCCGTCGAGCTGCCAATACTGACCGGTACAGTGGGCCCGGACGTGATCGACGTACGCGGTCTGACCGCCACCGGCCGCTTCACATTTGACCCTGGTTTCATGTCCACGGCCTCTTGCGAGTCGAAGATCACCTACATCGATGGTGACAACGGAATTCTGCTGCACCGCGGCTACCCGATCGAACAACTGGCCGAGCAGTCCGATTACCTCGAGACCTGCTACCTGTTGCTCAACGGCGAGCTGCCAACCGCCGAACAGAAAGCCCAGTTCGTGGCCGTGGTCAAGAACCACACAATGGTTCACGAACAACTCAAGACCTTCTTCAACGGCTTTCGCCGTGACGCCCACCCGATGGCCGTCATGTGCGGTGTAGTCGGAGCCCTGTCGG…
141	AF0015	NZL	Freshwater	KJ877803		Berge et al., 2014	TCGACGTACGCGGTCTGACCGCCACCGGCCGCTTCACATTTGACCCTGGTTTCATGTCCACGGCCTCTTGCGAGTCGAAGATCACCTACATTGACGGTGACAACGGAATTCTGCTGCACCGCGGTTACCCGATCGAACAACTGGCCGAGCAGTCCGATTACCTCGAGACCTGCTACCTGTTGCTCAACGGCGAGCTGCCAACCGCCGAACAGAAAGCCCAGTTCGTGGCCGTGGTCAAGAACCACACAATGGTTCACGAACAACTCAAGACCTTCTTCAACGGCTTTCGCCGTGACGCCCACCCGATGGCCGTCATGTGCGGTGTAGTCGGCGCCCTGTCGGCGTTCTACCACGATTCGCTCGACATCAATAACCCGCAGCACCGCGAAATTTCGGCTG…
141	CLA0509	FRA	Rain	KJ878140		Berge et al., 2014	GCTGCCCCCGTCGAGCTGCCAATACTGACCGGTACAGTGGGTCCGGACGTGATCGACGTACGCGGTCTGACCGCCACCGGCCGCTTCACATTTGACCCTGGTTTCATGTCCACGGCCTCTTGCGAGTCGAAGATCACCTACATTGACGGTGACAACGGAATTCTGCTGCACCGCGGTTACCCGATCGAACAACTGGCCGAGCAGTCCGATTACCTCGAGACCTGCTACCTGTTGCTCAACGGCGAGCTGCCAACCGCCGAACAGAAAGCCCAGTTCGTGGCCGTGGTCAAGAACCACACAATGGTTCACGAACAACTCAAGACCTTCTTCAACGGCTTTCGCCGTGACGCCCACCCGATGGCCGTCATGTGCGGTGTAGTCGGCGCCCTGTCGGCGTTC…
142	CSZ0343	FRA	Freshwater	KJ878258		Berge et al., 2014	GCCCCCGTCGAGCTGCCAATACTGACCGGTACAGTGGGTCCGGACGTGATCGACGTACGCGGTCTGACCGCCACCGGCCGCTTCACATTTGACCCTGGTTTCATGTCCACGGCCTCTTGCGAGTCGAAGATCACCTACATTGACGGTGACAACGGAATTCTGCTGCACCGCGGCTACCCGATCGAACAACTGGCCGAGCAGTCCGATTACCTCGAGACCTGCTACCTGTTGCTCAACGGCGAGCTGCCAACCGCCGAACAGAAAGCCCAGTTCGTGGCCGTGGTCAAGAACCACACAATGGTTCACGAACAACTCAAGACCTTCTTCAACGGCTTTCGCCGTGACGCCCACCCGATGGCCGTCATGTGCGGTGTAGTCGGCGCCCTGTCGGCGTTCTAC…
142	SZB0070	FRA	Biofilm	KJ878477		Berge et al., 2014	GAGGGCGCTGCCCCCGTCGAGCTGCCAATACTGACCGGTACAGTGGGTCCGGACGTGATCGACGTACGCGGTCTGACCGCCACCGGCCGCTTCACATTTGACCCTGGTTTCATGTCCACGGCCTCTTGCGAGTCGAAGATCACCTACATTGACGGTGACAACGGAATTCTGCTGCACCGCGGCTACCCGATCGAACAACTGGCCGAGCAGTCCGATTACCTCGAGACCTGCTACCTGTTGCTCAACGGCGAGCTGCCAACCGCCGAACAGAAAGCCCAGTTCGTGGCCGTGGTCAAGAACCACACAATGGTTCACGAACAACTCAAGACCTTCTTCAACGGCTTTCGCCGTGACGCCCACCCGATGGCCGTCATGTGCGGTGTAGTCGGCGCCCTGTCG…
143	CC1556	FRA	Snowpack	KJ877900		Berge et al., 2014	GCCCCCGTCGAGCTGCCAATACTGACCGGTACAGTGGGCCCGGACGTGATCGACGTACGCGGTCTGACCGCCACCGGCCGCTTCACATTTGACCCTGGTTTCATGTCCACGGCCTCTTGCGAGTCGAAGATCACCTACATCGATGGTGACAACGGAATTCTGCTGCACCGCGGCTACCCGATCGAACAACTGGCCGAGCAGTCCGATTACCTCGAGACCTGCTACCTGTTGCTCAACGGCGAGCTGCCAACCGCCGAACAGAAAGCCCAGTTCGTGGCCGTGGTCAAGAACCACACAATGGTTCACGAACAACTCAAGACTTTCTTCAACGGCTTTCGCCGTGACGCCCACCCGATGGCCGTCATGTGCGGTGTAGTCGGCGCCCTGTCGGCGTTCTAC…
143	CC1558	FRA	Snowpack	KJ877901		Berge et al., 2014	GTGATCGACGTACGCGGTCTGACCGCCACCGGCCGCTTCACATTTGACCCTGGTTTCATGTCCACGGCCTCTTGCGAGTCGAAGATCACCTACATCGATGGTGACAACGGAATTCTGCTGCACCGCGGCTACCCGATCGAACAACTGGCCGAGCAGTCCGATTACCTCGAGACCTGCTACCTGTTGCTCAACGGCGAGCTGCCAACCGCCGAACAGAAAGCCCAGTTCGTGGCCGTGGTCAAGAACCACACAATGGTTCACGAACAACTCAAGACTTTCTTCAACGGCTTTCGCCGTGACGCCCACCCGATGGCCGTCATGTGCGGTGTAGTCGGCGCCCTGTCGGCGTTCTACCACGATTCGCTGGACATCAATAACCCGCAGCACCGCGAAATTTCG…
143	CC1559	FRA	Snowpack	AVEG00000000		Berge et al., 2014	ATGGCTGACAAAAAAGCGCAGTTGATCATCGAGGGCGCTGCCCCCGTCGAGCTGCCAATACTGACCGGTACAGTGGGCCCGGACGTGATCGACGTACGCGGTCTGACCGCCACCGGCCGCTTCACATTTGACCCTGGTTTCATGTCCACGGCCTCTTGCGAGTCGAAGATCACCTACATCGATGGTGACAACGGAATTCTGCTGCACCGCGGCTACCCGATCGAACAACTGGCCGAGCAGTCCGATTACCTCGAGACCTGCTACCTGTTGCTCAACGGCGAGCTGCCAACCGCCGAACAGAAAGCCCAGTTCGTGGCCGTGGTCAAGAACCACACAATGGTTCACGAACAACTCAAGACTTTCTTCAACGGCTTTCGCCGTGACGCCCACCCGATGGCC…
143	JFJ-0061	CHE	Snowfall	KY379271		Stopelli et al, 2017	GAGGGCGCTGCCCCCGTCGAGCTGCCAATTCTGACCGGTACAGTGGGTCCGGACGTGATCGACGTACGCGGCCTGACCGCCACCGGCCGCTTCACATTTGACCCTGGCTTCATGTCCACGGCCTCTTGCGATTCGAAGATCACCTACATCGATGGTGATAATGGCATTCTGTTGCACCGCGGCTACCCGATCGAACAACTGGCCGAGCAGTCCGACTACCTGGAAACCTGCTACCTGCTGCTCAACGGCGAACTGCCCACCGCCGAGCAGAAAGCCCAGTTCGTGGCCGTGGTCAAGAACCACACGATGGTTCACGAACAGCTCAAGACCTTTTTCAACGGTTTCCGCCGTGACGCCCACCCGATGGCCGTCATGTGTGGTGTAGTCGGCGCCCTGTCA…
144	CC1427	USA	Biofilm	KJ877869		Berge et al., 2014	CACCGGCCGCTTCACATTTGACCCTGGTTTCATGTCCACGGCCTCTTGCGAGTCGAAGATCACCTACATCGATGGTGACAACGGAATTCTGCTGCACCGCGGCTACCCGATCGAACAACTGGCCGAGCAGTCCGATTACCTCGAGACCTGTTACCTGTTGCTCAACGGCGAGCTGCCAACCGCCGAACAGAAAGCCCAGTTCGTGGCCGTGGTCAAGAACCACACGATGGTTCACGAACAACTCAAGACCTTCTTCAACGGCTTTCGCCGTGACGCCCATCCGATGGCCGTCATGTGCGGTGTAGTCGGCGCCCTGTCGGCGTTCTACCACGATTCGCTCGACATCAATAACCCGCAGCATCGCGAAATTTCGGCTGTACGCCTGGTCGCCAAAATGCC…
144	CC1431	USA	Biofilm	KJ877873		Berge et al., 2014	CTGCCCCCGTCGAGCTGCCAATACTGACCGGTACAGTGGGTCCGGACGTGATCGACGTACGCGGTCTGACCGCCACCGGCCGCTTCACATTTGACCCTGGTTTCATGTCCACGGCCTCTTGCGAGTCGAAGATCACCTACATCGATGGTGACAACGGAATTCTGCTGCACCGCGGCTACCCGATCGAACAACTGGCCGAGCAGTCCGATTACCTCGAGACCTGTTACCTGTTGCTCAACGGCGAGCTGCCAACCGCCGAACAGAAAGCCCAGTTCGTGGCCGTGGTCAAGAACCACACGATGGTTCACGAACAACTCAAGACCTTCTTCAACGGCTTTCGCCGTGACGCCCATCCGATGGCCGTCATGTGCGGTGTAGTCGGCGCCCTGTCGGCGTTCT…
145	CC1429	USA	Biofilm	KJ877871		Berge et al., 2014	CGCTGCCCCCGTCGAGCTGCCAATACTGACCGGTACAGTGGGTCCGGACGTGATCGACGTACGCGGTCTGACCGCCACCGGCCGCTTCACATTTGACCCTGGTTTCATGTCCACGGCCTCTTGCGAGTCGAAGATCACCTACATCGATGGTGACAACGGAATTCTGCTGCACCGCGGCTACCCGATCGAACAACTGGCCGAGCAGTCCGATTACCTCGAGACCTGCTACCTGTTGCTCAACGGCGAGCTGCCAACCGCCGAACAGAAAGCCCAGTTCGTGGCCGTGGTCAAGAACCACACGATGGTTCACGAACAACTCAAGACCTTCTTCAACGGCTTTCGCCGTGACGCCCACCCGATGGCCGTCATGTGCGGTGTAGTCGGCGCCCTGTCGGCGTT…
145	CC1430	USA	Biofilm	KJ877872		Berge et al., 2014	GAGGGCGCTGCCCCCGTCGAGCTGCCAATACTGACCGGTACAGTGGGTCCGGACGTGATCGACGTACGCGGTCTGACCGCCACCGGCCGCTTCACATTTGACCCTGGTTTCATGTCCACGGCCTCTTGCGAGTCGAAGATCACCTACATCGATGGTGACAACGGAATTCTGCTGCACCGCGGCTACCCGATCGAACAACTGGCCGAGCAGTCCGATTACCTCGAGACCTGCTACCTGTTGCTCAACGGCGAGCTGCCAACCGCCGAACAGAAAGCCCAGTTCGTGGCCGTGGTCAAGAACCACACGATGGTTCACGAACAACTCAAGACCTTCTTCAACGGCTTTCGCCGTGACGCCCACCCGATGGCCGTCATGTGCGGTGTAGTCGGCGCCCTGTCG…
145	USA0001	USA	Freshwater	KJ878526		Berge et al., 2014	TGCCCCCGTCGAGCTGCCAATACTGACCGGTACAGTGGGTCCGGACGTGATCGACGTACGCGGTCTGACCGCCACCGGCCGCTTCACATTTGACCCTGGTTTCATGTCCACGGCCTCTTGCGAGTCGAAGATCACCTACATCGATGGTGACAACGGAATTCTGCTGCACCGCGGCTACCCGATCGAACAACTGGCCGAGCAGTCCGATTACCTCGAGACCTGCTACCTGTTGCTCAACGGCGAGCTGCCAACCGCCGAACAGAAAGCCCAGTTCGTGGCCGTGGTCAAGAACCACACGATGGTTCACGAACAACTCAAGACCTTCTTCAACGGCTTTCGCCGTGACGCCCACCCGATGGCCGTCATGTGCGGTGTAGTCGGCGCCCTGTCGGCGTTCTA…
145	USA0003	USA	Freshwater	KJ878527		Berge et al., 2014	TGCCCCCGTCGAGCTGCCAATACTGACCGGTACAGTGGGTCCGGACGTGATCGACGTACGCGGTCTGACCGCCACCGGCCGCTTCACATTTGACCCTGGTTTCATGTCCACGGCCTCTTGCGAGTCGAAGATCACCTACATCGATGGTGACAACGGAATTCTGCTGCACCGCGGCTACCCGATCGAACAACTGGCCGAGCAGTCCGATTACCTCGAGACCTGCTACCTGTTGCTCAACGGCGAGCTGCCAACCGCCGAACAGAAAGCCCAGTTCGTGGCCGTGGTCAAGAACCACACGATGGTTCACGAACAACTCAAGACCTTCTTCAACGGCTTTCGCCGTGACGCCCACCCGATGGCCGTCATGTGCGGTGTAGTCGGCGCCCTGTCGGCGTTCTA…
145	USA0019	USA	Freshwater	KJ878531		Berge et al., 2014	CTGCCCCCGTCGAGCTGCCAATACTGACCGGTACAGTGGGTCCGGACGTGATCGACGTACGCGGTCTGACCGCCACCGGCCGCTTCACATTTGACCCTGGTTTCATGTCCACGGCCTCTTGCGAGTCGAAGATCACCTACATCGATGGTGACAACGGAATTCTGCTGCACCGCGGCTACCCGATCGAACAACTGGCCGAGCAGTCCGATTACCTCGAGACCTGCTACCTGTTGCTCAACGGCGAGCTGCCAACCGCCGAACAGAAAGCCCAGTTCGTGGCCGTGGTCAAGAACCACACGATGGTTCACGAACAACTCAAGACCTTCTTCAACGGCTTTCGCCGTGACGCCCACCCGATGGCCGTCATGTGCGGTGTAGTCGGCGCCCTGTCGGCGTTCT…
146	18882	NZL	Plant	JN683502		Berge et al., 2014	CCCGTCGAGCTGCCAATACTGACCGGTACAGTGGGTCCGGACGTGATCGACGTACGCGGTCTGACCGCCACCGGCCGCTTCACATTTGACCCTGGCTTCATGTCCACGGCCTCTTGCGAGTCGAAGATCACCTACATCGATGGTGACAACGGAATTCTGCTGCACCGCGGCTACCCTATCGAACAACTGGCCGAGCAGTCCGATTACCTCGAGACCTGCTACCTGCTGCTCAACGGCGAGCTGCCAACCGCCGAACAGAAAGCCCAGTTCGTGGCCGTGGTCAAGAACCACACGATGGTTCATGAACAACTCAAGACCTTCTTCAACGGCTTTCGCCGTGACGCCCACCCGATGGCCGTCATGTGCGGTGTAGTCGGCGCGCTGTCGGCGTTCTACCAC…
146	28830	AUS	Plant	JX287994		Chapman et al, 2012	GTGATCGACGTACGCGGTCTGACCGCCACCGGCCGCTTCACATTTGACCCTGGCTTCATGTCCACGGCCTCTTGCGAGTCGAAGATCACCTACATCGATGGTGACAACGGAATTCTGCTGCACCGCGGCTACCCTATCGAACAACTGGCCGAGCAGTCCGATTACCTCGAGACCTGCTACCTGCTGCTCAACGGCGAGCTGCCAACCGCCGAACAGAAAGCCCAGTTCGTGGCCGTGGTCAAGAACCACACGATGGTTCATGAACAACTCAAGACCTTCTTCAACGGCTTTCGCCGTGACGCCCACCCGATGGCCGTCATGTGCGGTGTAGTCGGCGCGCTGTCGGCGTTCTACCACGATTCGCTGGACATCAATAACCCGCAGCACCGCGAAATTTCG…
146	T10_04976	NZL	Plant	JN683498		Chapman et al, 2012	CTGACCGGTACAGTGGGTCCGGACGTGATCGACGTACGCGGTCTGACCGCCACCGGCCGCTTCACATTTGACCCTGGCTTCATGTCCACGGCCTCTTGCGAGTCGAAGATCACCTACATCGATGGTGACAACGGAATTCTGCTGCACCGCGGCTACCCTATCGAACAACTGGCCGAGCAGTCCGATTACCTCGAGACCTGCTACCTGCTGCTCAACGGCGAGCTGCCAACCGCCGAACAGAAAGCCCAGTTCGTGGCCGTGGTCAAGAACCACACGATGGTTCATGAACAACTCAAGACCTTCTTCAACGGCTTTCGCCGTGACGCCCACCCGATGGCCGTCATGTGCGGTGTAGTCGGCGCGCTGTCGGCGTTCTACCACGATTCGCTGGACATCAAT…
146	T11_01369A	AUS	Plant	JQ836618		Chapman et al, 2012	CCCGTCGAGCTGCCAATACTGACCGGTACAGTGGGTCCGGACGTGATCGACGTACGCGGTCTGACCGCCACCGGCCGCTTCACATTTGACCCTGGCTTCATGTCCACGGCCTCTTGCGAGTCGAAGATCACCTACATCGATGGTGACAACGGAATTCTGCTGCACCGCGGCTACCCTATCGAACAACTGGCCGAGCAGTCCGATTACCTCGAGACCTGCTACCTGCTGCTCAACGGCGAGCTGCCAACCGCCGAACAGAAAGCCCAGTTCGTGGCCGTGGTCAAGAACCACACGATGGTTCATGAACAACTCAAGACCTTCTTCAACGGCTTTCGCCGTGACGCCCACCCGATGGCCGTCATGTGCGGTGTAGTCGGCGCGCTGTCGGCGTTCTACCAC…
146	CFBP7903	NZL	Plant	KF937512		https://cirm-cfbp.fr/	GTACGCGGTCTGACCGCCACCGGCCGCTTCACATTTGACCCTGGCTTCATGTCCACGGCCTCTTGCGAGTCGAAGATCACCTACATCGATGGTGACAACGGAATTCTGCTGCACCGCGGCTACCCTATCGAACAACTGGCCGAGCAGTCCGATTACCTCGAGACCTGCTACCTGCTGCTCAACGGCGAGCTGCCAACCGCCGAACAGAAAGCCCAGTTCGTGGCCGTGGTCAAGAACCACACGATGGTTCATGAACAACTCAAGACCTTCTTCAACGGCTTTCGCCGTGACGCCCACCCGATGGCCGTCATGTGCGGTGTAGTCGGCGCGCTGTCGGCGTTCTACCACGATTCGCTGGACATCAATAACCCGCAGCACCGCGAAATTTCGGCTGTACGC…
146	CFBP8039	FRA	Plant	PRJNA287872		https://cirm-cfbp.fr/	GTACGCGGTCTGACCGCCACCGGCCGCTTCACATTTGACCCTGGCTTCATGTCCACGGCCTCTTGCGAGTCGAAGATCACCTACATCGATGGTGACAACGGAATTCTGCTGCACCGCGGCTACCCTATCGAACAACTGGCCGAGCAGTCCGATTACCTCGAGACCTGCTACCTGCTGCTCAACGGCGAGCTGCCAACCGCCGAACAGAAAGCCCAGTTCGTGGCCGTGGTCAAGAACCACACGATGGTTCATGAACAACTCAAGACCTTCTTCAACGGCTTTCGCCGTGACGCCCACCCGATGGCCGTCATGTGCGGTGTAGTCGGCGCGCTGTCGGCGTTCTACCACGATTCGCTGGACATCAATAACCCGCAGCACCGCGAAATTTCGGCTGTACGC…
146	CFBP8043	FRA	Plant	PRJNA287873		https://cirm-cfbp.fr/	GTACGCGGTCTGACCGCCACCGGCCGCTTCACATTTGACCCTGGCTTCATGTCCACGGCCTCTTGCGAGTCGAAGATCACCTACATCGATGGTGACAACGGAATTCTGCTGCACCGCGGCTACCCTATCGAACAACTGGCCGAGCAGTCCGATTACCTCGAGACCTGCTACCTGCTGCTCAACGGCGAGCTGCCAACCGCCGAACAGAAAGCCCAGTTCGTGGCCGTGGTCAAGAACCACACGATGGTTCATGAACAACTCAAGACCTTCTTCAACGGCTTTCGCCGTGACGCCCACCCGATGGCCGTCATGTGCGGTGTAGTCGGCGCGCTGTCGGCGTTCTACCACGATTCGCTCGACATCAATAACCCGCAGCACCGCGAAATTTCGGCTGTACGC…
146	CFBP8044	AUS	Plant	KF937541		https://cirm-cfbp.fr/	GTACGCGGTCTGACCGCCACCGGCCGCTTCACATTTGACCCTGGCTTCATGTCCACGGCCTCTTGCGAGTCGAAGATCACCTACATCGATGGTGACAACGGAATTCTGCTGCACCGCGGCTACCCTATCGAACAACTGGCCGAGCAGTCCGATTACCTCGAGACCTGCTACCTGCTGCTCAACGGCGAGCTGCCAACCGCCGAACAGAAAGCCCAGTTCGTGGCCGTGGTCAAGAACCACACGATGGTTCATGAACAACTCAAGACCTTCTTCAACGGCTTTCGCCGTGACGCCCACCCGATGGCCGTCATGTGCGGTGTAGTCGGCGCGCTGTCGGCGTTCTACCACGATTCGCTGGACATCAATAACCCGCAGCACCGCGAAATTTCGGCTGTACGC…
146	CFBP8067	FRA	Plant	KF937564		https://cirm-cfbp.fr/	GTACGCGGTCTGACCGCCACCGGCCGCTTCACATTTGACCCTGGCTTCATGTCCACGGCCTCTTGCGAGTCGAAGATCACCTACATCGATGGTGACAACGGAATTCTGCTGCACCGCGGCTACCCTATCGAACAACTGGCCGAGCAGTCCGATTACCTCGAGACCTGCTACCTGCTGCTCAACGGCGAGCTGCCAACCGCCGAACAGAAAGCCCAGTTCGTGGCCGTGGTCAAGAACCACACGATGGTTCATGAACAACTCAAGACCTTCTTCAACGGCTTTCGCCGTGACGCCCACCCGATGGCCGTCATGTGCGGTGTAGTCGGCGCGCTGTCGGCGTTCTACCACGATTCGCTGGACATCAATAACCCGCAGCACCGCGAAATTTCGGCTGTACGC…
146	CFBP8160	FRA	Plant	PRJNA287746		https://cirm-cfbp.fr/	GTACGCGGTCTGACCGCCACCGGCCGCTTCACATTTGACCCTGGCTTCATGTCCACGGCCTCTTGCGAGTCGAAGATCACCTACATCGATGGTGACAACGGAATTCTGCTGCACCGCGGCTACCCTATCGAACAACTGGCCGAGCAGTCCGATTACCTCGAGACCTGCTACCTGCTGCTCAACGGCGAGCTGCCAACCGCCGAACAGAAAGCCCAGTTCGTGGCCGTGGTCAAGAACCACACGATGGTTCATGAACAACTCAAGACCTTCTTCAACGGCTTTCGCCGTGACGCCCACCCGATGGCCGTCATGTGCGGTGTAGTCGGCGCGCTGTCGGCGTTCTACCACGATTCGCTGGACATCAATAACCCGCAGCACCGCGAAATTTCGGCTGTACGC…
146	CFBP8161	FRA	Plant	LJFL01000000		https://cirm-cfbp.fr/	GTACGCGGTCTGACCGCCACCGGCCGCTTCACATTTGACCCTGGCTTCATGTCCACGGCCTCTTGCGAGTCGAAGATCACCTACATCGATGGTGACAACGGAATTCTGCTGCACCGCGGCTACCCTATCGAACAACTGGCCGAGCAGTCCGATTACCTCGAGACCTGCTACCTGCTGCTCAACGGCGAGCTGCCAACCGCCGAACAGAAAGCCCAGTTCGTGGCCGTGGTCAAGAACCACACGATGGTTCATGAACAACTCAAGACCTTCTTCAACGGCTTTCGCCGTGACGCCCACCCGATGGCCGTCATGTGCGGTGTAGTCGGCGCGCTGTCGGCGTTCTACCACGATTCGCTGGACATCAATAACCCGCAGCACCGCGAAATTTCGGCTGTACGC…
146	MAFF212159	JPN	Plant	PGSM00000000		https://www.gene.affrc.go.jp/databases-micro_search_en.php	GTACGCGGTCTGACCGCCACCGGCCGCTTCACATTTGACCCTGGCTTCATGTCCACGGCCTCTTGCGAGTCGAAGATCACCTACATCGATGGTGACAACGGAATTCTGCTGCACCGCGGCTACCCTATCGAACAACTGGCCGAGCAGTCCGATTACCTCGAGACCTGCTACCTGCTGCTCAACGGCGAGCTGCCAACCGCCGAACAGAAAGCCCAGTTCGTGGCCGTGGTCAAGAACCACACGATGGTTCATGAACAACTCAAGACCTTCTTCAACGGCTTTCGCCGTGACGCCCACCCGATGGCCGTCATGTGCGGTGTAGTCGGCGCGCTGTCGGCGTTCTACCACGATTCGCTCGACATCAATAACCCGCAGCACCGCGAAATTTCGGCTGTACGC…
146	MAFF212160	JPN	Plant	LC198816		https://www.gene.affrc.go.jp/databases-micro_search_en.php	GTACGCGGTCTGACCGCCACCGGCCGCTTCACATTTGACCCTGGCTTCATGTCCACGGCCTCTTGCGAGTCGAAGATCACCTACATCGATGGTGACAACGGAATTCTGCTGCACCGCGGCTACCCTATCGAACAACTGGCCGAGCAGTCCGATTACCTCGAGACCTGCTACCTGCTGCTCAACGGCGAGCTGCCAACCGCCGAACAGAAAGCCCAGTTCGTGGCCGTGGTCAAGAACCACACGATGGTTCATGAACAACTCAAGACCTTCTTCAACGGCTTTCGCCGTGACGCCCACCCGATGGCCGTCATGTGCGGTGTAGTCGGCGCGCTGTCGGCGTTCTACCACGATTCGCTCGACATCAATAACCCGCAGCACCGCGAAATTTCGGCTGTACGC…
146	JFJ-0048	CHE	Snowfall	KY379258		Stopelli et al, 2017	GAGGGCGCTGCCCCCGTCGAGCTGCCAATTCTGACCGGTACAGTGGGTCCGGACGTGATCGACGTACGCGGCCTGACCGCCACCGGCCGCTTCACATTTGACCCTGGTTTCATGTCCACGGCCTCTTGCGATTCGAAGATCACCTACATCGATGGTGATAATGGCATTCTGCTACACCGCGGCTACCCGATCGAACAACTGGCCGAGCAGTCCGACTATCTCGAAACCTGCTACCTGCTGCTCAACGGTGAACTGCCCACCGCCGAGCAGAAAGCCCAGTTCGTGGCCGTGGTCAAGAACCACACGATGGTTCACGAACAGCTCAAGACCTTTTTCAACGGTTTCCGCCGCGACGCCCACCCGATGGCCGTCATGTGCGGCGTAGTCGGCGCCCTGTCA…
147	MAFF212156	JPN	Plant	PGSL00000000		https://www.gene.affrc.go.jp/databases-micro_search_en.php	GTACGCGGTCTGACCGCCACCGGCCGCTTCACATTTGACCCTGGTTTCATGTCCACGGCCTCTTGCGAGTCGAAGATCACCTACATCGATGGTGACAACGGAATTCTGCTGCACCGCGGCTACCCGATCGAACAGCTGGCCGAGCAGTCCGATTACCTCGAGACCTGCTACCTGTTGCTCAACGGCGAGCTGCCAACCGCCGAACAGAAAGCCCAGTTCGTGGCCGTGGTCAAGAACCACACGATGGTTCACGAACAACTCAAGACCTTCTTCAACGGCTTTCGCCGTGACGCCCACCCGATGGCCGTCATGTGCGGTGTAGTCGGCGCGCTGTCGGCGTTCTACCACGATTCGCTGGACATCAATAACCCGCAGCACCGCGAAATTTCGGCTGTACGC…
147	MAFF212157	JPN	Plant	PGSI00000000		https://www.gene.affrc.go.jp/databases-micro_search_en.php	GTACGCGGTCTGACCGCCACCGGCCGCTTCACATTTGACCCTGGTTTCATGTCCACGGCCTCTTGCGAGTCGAAGATCACCTACATCGATGGTGACAACGGAATTCTGCTGCACCGCGGCTACCCGATCGAACAGCTGGCCGAGCAGTCCGATTACCTCGAGACCTGCTACCTGTTGCTCAACGGCGAGCTGCCAACCGCCGAACAGAAAGCCCAGTTCGTGGCCGTGGTCAAGAACCACACGATGGTTCACGAACAACTCAAGACCTTCTTCAACGGCTTTCGCCGTGACGCCCACCCGATGGCCGTCATGTGCGGTGTAGTCGGCGCGCTGTCGGCGTTCTACCACGATTCGCTGGACATCAATAACCCGCAGCACCGCGAAATTTCGGCTGTACGC…
148	MAFF212171	JPN	Plant	LC198818		https://www.gene.affrc.go.jp/databases-micro_search_en.php	GTACGCGGTCTGACCGCCACCGGCCGCTTCACATTTGACCCTGGTTTCATGTCCACGGCCTCTTGCGAGTCGAAGATCACCTACATCGATGGTGACAACGGAATTCTGCTGCACCGCGGCTACCCGATCGAACAACTGGCCGAGCAGTCCGATTACCTCGAGACCTGCTACCTGTTGCTCAACGGCGAGCTGCCAACCGCCGAACAGAAAGCCCAGTTCGTGGCCGTGGTCAAGAACCACACGATGGTTCATGAACAACTCAAGACCTTCTTCAACGGCTTTCGCCGTGACGCCCACCCGATGGCCGTCATGTGCGGTGTAGTCGGCGCGCTGTCGGCGTTCTACCACGATTCGCTGGACATCAATAACCCGCAGCACCGCGAAATTTCGGCTGTACGC…
148	MAFF212172	JPN	Plant	PGSK00000000		https://www.gene.affrc.go.jp/databases-micro_search_en.php	GTACGCGGTCTGACCGCCACCGGCCGCTTCACATTTGACCCTGGTTTCATGTCCACGGCCTCTTGCGAGTCGAAGATCACCTACATCGATGGTGACAACGGAATTCTGCTGCACCGCGGCTACCCGATCGAACAACTGGCCGAGCAGTCCGATTACCTCGAGACCTGCTACCTGTTGCTCAACGGCGAGCTGCCAACCGCCGAACAGAAAGCCCAGTTCGTGGCCGTGGTCAAGAACCACACGATGGTTCATGAACAACTCAAGACCTTCTTCAACGGCTTTCGCCGTGACGCCCACCCGATGGCCGTCATGTGCGGTGTAGTCGGCGCGCTGTCGGCGTTCTACCACGATTCGCTGGACATCAATAACCCGCAGCACCGCGAAATTTCGGCTGTACGC…
149	CC1416	USA	Biofilm	AVEP00000000		Berge et al., 2014	ATGGCTGACAAAAAAGCGCAGTTGATCATCGAGGGCGCTGCCCCCGTCGAGCTGCCAATACTGACCGGTACAGTGGGTCCGGACGTGATCGACGTACGCGGTCTGACCGCCACCGGCCGCTTCACATTTGACCCTGGTTTCATGTCCACGGCCTCTTGCGAGTCGAAGATCACCTACATTGACGGTGACAACGGAATTCTGCTGCACCGCGGCTACCCGATCGAACAACTGGCCGAGCAGTCCGATTACCTCGAGACCTGCTACCTGTTGCTCAACGGCGAGCTGCCAACTGCCGAACAGAAAGCCCAGTTCGTGGCCGTGGTCAAGAACCACACGATGGTTCACGAACAACTCAAGACCTTCTTCAACGGTTTTCGCCGTGACGCCCACCCGATGGCC…
149	USA0041	USA	Freshwater	KJ878535		Berge et al., 2014	GATCGACGTACGCGGTCTGACCGCCACCGGCCGCTTCACATTTGACCCTGGTTTCATGTCCACGGCCTCTTGCGAGTCGAAGATCACCTACATTGACGGTGACAACGGAATTCTGCTGCACCGCGGCTACCCGATCGAACAACTGGCCGAGCAGTCCGATTACCTCGAGACCTGCTACCTGTTGCTCAACGGCGAGCTGCCAACTGCCGAACAGAAAGCCCAGTTCGTGGCCGTGGTCAAGAACCACACGATGGTTCACGAACAACTCAAGACCTTCTTCAACGGTTTTCGCCGTGACGCCCACCCGATGGCCGTCATGTGCGGTGTAGTCGGCGCGCTGTCGGCGTTCTACCACGATTCGCTCGACATCAATAACCCGCAGCACCGCGAAATTTCGGC…
150	DAFNEVT10	ITA	Plant	KJ878319		Berge et al., 2014	CACCGGCCGCTTCACATTTGACCCTGGTTTCATGTCCACGGCCTCTTGCGAGTCGAAGATCACCTACATTGACGGTGACAACGGAATTCTGCTGCACCGCGGCTACCCTATCGAACAACTGGCCGAGCAGTCCGATTACCTCGAGACCTGCTACCTGTTGCTCAACGGCGAGCTGCCAACCGCCGAACAGAAAGCCCAGTTCGTGGCCGTGGTCAAGAACCACACGATGGTTCACGAACAACTCAAGACCTTCTTCAACGGCTTTCGCCGTGACGCCCACCCGATGGCCGTCATGTGCGGTGTAGTCGGCGCGCTGTCGGCGTTCTACCACGATTCGCTCGACATCAATAACCCGCAGCACCGCGAAATTTCGGCTGTACGCCTGGTCGCCAAGATGCC…
150	NCPPB3489	GRC	Plant	NA	http://genome.ppws.vt.edu/cgi-bin/MLST/home.pl	Berge et al., 2014	CACCGGCCGCTTCACATTTGACCCTGGTTTCATGTCCACGGCCTCTTGCGAGTCGAAGATCACCTACATTGACGGTGACAACGGAATTCTGCTGCACCGCGGCTACCCTATCGAACAACTGGCCGAGCAGTCCGATTACCTCGAGACCTGCTACCTGTTGCTCAACGGCGAGCTGCCAACCGCCGAACAGAAAGCCCAGTTCGTGGCCGTGGTCAAGAACCACACGATGGTTCACGAACAACTCAAGACCTTCTTCAACGGCTTTCGCCGTGACGCCCACCCGATGGCCGTCATGTGCGGTGTAGTCGGCGCGCTGTCGGCGTTCTACCACGATTCGCTCGACATCAATAACCCGCAGCACCGCGAAATTTCGGCTGTACGCCTGGTCGCCAAGATGCC…
150	PavBPIC631	GRC	Plant	NA	http://genome.ppws.vt.edu/cgi-bin/MLST/home.pl	Berge et al., 2014	ATGGCTGACAAAAAAGCGCAGTTGATCATCGAGGGCGCTGCCCCCGTCGAGCTGCCAATACTGACCGGTACAGTGGGTCCGGACGTGATCGACGTACGCGGTCTGACCGCCACCGGCCGCTTCACATTTGACCCTGGTTTCATGTCCACGGCCTCTTGCGAGTCGAAGATCACCTACATTGACGGTGACAACGGAATTCTGCTGCACCGCGGCTACCCTATCGAACAACTGGCCGAGCAGTCCGATTACCTCGAGACCTGCTACCTGTTGCTCAACGGCGAGCTGCCAACCGCCGAACAGAAAGCCCAGTTCGTGGCCGTGGTCAAGAACCACACGATGGTTCACGAACAACTCAAGACCTTCTTCAACGGCTTTCGCCGTGACGCCCACCCGATGGCC…
150	PaVt10	ITA	Plant	KJ878424		Berge et al., 2014	GCCCCCGTCGAGCTGCCAATACTGACCGGTACAGTGGGTCCGGACGTGATCGACGTACGCGGTCTGACCGCCACCGGCCGCTTCACATTTGACCCTGGTTTCATGTCCACGGCCTCTTGCGAGTCGAAGATCACCTACATTGACGGTGACAACGGAATTCTGCTGCACCGCGGCTACCCTATCGAACAACTGGCCGAGCAGTCCGATTACCTCGAGACCTGCTACCTGTTGCTCAACGGCGAGCTGCCAACCGCCGAACAGAAAGCCCAGTTCGTGGCCGTGGTCAAGAACCACACGATGGTTCACGAACAACTCAAGACCTTCTTCAACGGCTTTCGCCGTGACGCCCACCCGATGGCCGTCATGTGCGGTGTAGTCGGCGCGCTGTCGGCGTTCTAC…
150	CFBP4060	GRC	Plant	ATDK00000000		https://cirm-cfbp.fr/	ATGGCTGACAAAAAAGCGCAGTTGATCATCGAGGGCGCTGCCCCCGTCGAGCTGCCAATACTGACCGGTACAGTGGGTCCGGACGTGATCGACGTACGCGGTCTGACCGCCACCGGCCGCTTCACATTTGACCCTGGTTTCATGTCCACGGCCTCTTGCGAGTCGAAGATCACCTACATTGACGGTGACAACGGAATTCTGCTGCACCGCGGCTACCCTATCGAACAACTGGCCGAGCAGTCCGATTACCTCGAGACCTGCTACCTGTTGCTCAACGGCGAGCTGCCAACCGCCGAACAGAAAGCCCAGTTCGTGGCCGTGGTCAAGAACCACACGATGGTTCACGAACAACTCAAGACCTTCTTCAACGGCTTTCGCCGTGACGCCCACCCGATGGCC…
151	M302280PT	GBR	Plant	AEAE00000000		Berge et al., 2014	ATGGCTGACAAAAAAGCGCAGTTGATCATCGAGGGCGCTGCCCCCGTCGAGCTGCCAATACTGACCGGTACAGTGGGTCCGGACGTGATCGACGTACGCGGTCTGACCGCCACCGGCCGCTTCACATTTGACCCTGGTTTCATGTCCACGGCCTCTTGCGAGTCGAAGATCACCTACATCGATGGTGACAACGGAATTCTGCTGCACCGCGGCTACCCGATCGAACAACTGGCCGAGCAGTCCGATTATCTCGAGACCTGCTACCTGCTGCTCAACGGCGAGCTGCCAACCGCCGAACAGAAAGCCCAGTTCGTGGCCGTGGTCAAGAACCACACGATGGTTCACGAACAACTCAAGACCTTCTTCAACGGCTTTCGCCGTGACGCCCACCCGATGGCC…
151	CFBP2351	USA	Plant	KF937502		https://cirm-cfbp.fr/	GTACGCGGTCTGACCGCCACCGGCCGCTTCACATTTGACCCTGGTTTCATGTCCACGGCCTCTTGCGAGTCGAAGATCACCTACATCGATGGTGACAACGGAATTCTGCTGCACCGCGGCTACCCGATCGAACAACTGGCCGAGCAGTCCGATTATCTCGAGACCTGCTACCTGCTGCTCAACGGCGAGCTGCCAACCGCCGAACAGAAAGCCCAGTTCGTGGCCGTGGTCAAGAACCACACGATGGTTCACGAACAACTCAAGACCTTCTTCAACGGCTTTCGCCGTGACGCCCACCCGATGGCCGTCATGTGCGGTGTAGTCGGCGCGCTGTCGGCGTTCTACCACGATTCGCTGGACATCAATAACCCGCAGCACCGCGAAATTTCGGCTGTACGC…
152	KW30	JPN	Plant	NA	http://genome.ppws.vt.edu/cgi-bin/MLST/home.pl	Berge et al., 2014	GACGTGATCGACGTACGCGGTCTGACCGCCACCGGCCGCTTCACATTTGACCCTGGTTTCATGTCCACGGCCTCTTGCGAGTCGAAGATCACCTACATCGATGGTGACAACGGAATTCTGCTGCACCGCGGCTACCCGATCGAACAACTGGCCGAGCAGTCCGATTATCTCGAGACCTGCTACCTGTTGCTCAACGGCGAGCTGCCAACCGCCGAACAGAAAGCCCAGTTCGTGGCCGTGGTCAAGAACCATACGATGGTTCACGAACAACTCAAGACCTTCTTCAACGGCTTTCGCCGTGACGCCCACCCGATGGCCGTCATGTGCGGTGTAGTCGGCGCCCTGTCGGCGTTCTACCACGATTCGCTGGACATCAATAACCCGCAGCACCGCGAAATT…
152	M302091	JPN	Plant	AEAL00000000		Berge et al., 2014	ATGGCTGACAAAAAAGCGCAGTTGATCATCGAGGGCGCTGCCCCCGTCGAGCTGCCAATACTGACCGGTACAGTGGGTCCGGACGTGATCGACGTACGCGGTCTGACCGCCACCGGCCGCTTCACATTTGACCCTGGTTTCATGTCCACGGCCTCTTGCGAGTCGAAGATCACCTACATCGATGGTGACAACGGAATTCTGCTGCACCGCGGCTACCCGATCGAACAACTGGCCGAGCAGTCCGATTATCTCGAGACCTGCTACCTGTTGCTCAACGGCGAGCTGCCAACCGCCGAACAGAAAGCCCAGTTCGTGGCCGTGGTCAAGAACCATACGATGGTTCACGAACAACTCAAGACCTTCTTCAACGGCTTTCGCCGTGACGCCCACCCGATGGCC…
152	PA429	JPN	Plant	NA		Berge et al., 2014	CCCGTCGAGCTGCCAATTTTGCTGACCGGTACAGTGGGTCCGGACGTGATCGACGTACGCGGTCTGACCGCCACCGGCCGCTTCACATTTGACCCTGGTTTCATGTCCACGGCCTCTTGCGAGTCGAAGATCACCTACATCGATGGTGACAACGGAATTCTGCTGCACCGCGGCTACCCGATCGAACAACTGGCCGAGCAGTCCGATTATCTCGAGACCTGCTACCTGTTGCTCAACGGCGAGCTGCCAACCGCCGAACAGAAAGCCCAGTTCGTGGCCGTGGTCAAGAACCATACGATGGTTCACGAACAACTCAAGACCTTCTTCAACGGCTTTCGCCGTGACGCCCACCCGATGGCCGTCATGTGCGGTGTAGTCGGCGCCCTGTCGGCGTTCTAC…
152	PA459	JPN	Plant	NA	http://pacu.facom.ufms.br/blast_kiwi/blast.html	Berge et al., 2014	ATGGCTGACAAAAAAGCGCAGTTGATCATCGAGGGCGCTGCCCCCGTCGAGCTGCCAATACTGACCGGTACAGTGGGTCCGGACGTGATCGACGTACGCGGTCTGACCGCCACCGGCCGCTTCACATTTGACCCTGGTTTCATGTCCACGGCCTCTTGCGAGTCGAAGATCACCTACATCGATGGTGACAACGGAATTCTGCTGCACCGCGGCTACCCGATCGAACAACTGGCCGAGCAGTCCGATTATCTCGAGACCTGCTACCTGTTGCTCAACGGCGAGCTGCCAACCGCCGAACAGAAAGCCCAGTTCGTGGCCGTGGTCAAGAACCATACGATGGTTCACGAACAACTCAAGACCTTCTTCAACGGCTTTCGCCGTGACGCCCACCCGATGGCC…
152	CFBP4909	JPN	Plant	PRJNA167426		https://cirm-cfbp.fr/	ATGGCTGACAAAAAAGCGCAGTTGATCATCGAGGGCGCTGCCCCCGTCGAGCTGCCAATACTGACCGGTACAGTGGGTCCGGACGTGATCGACGTACGCGGTCTGACCGCCACCGGCCGCTTCACATTTGACCCTGGTTTCATGTCCACGGCCTCTTGCGAGTCGAAGATCACCTACATCGATGGTGACAACGGAATTCTGCTGCACCGCGGCTACCCGATCGAACAACTGGCCGAGCAGTCCGATTATCTCGAGACCTGCTACCTGTTGCTCAACGGCGAGCTGCCAACCGCCGAACAGAAAGCCCAGTTCGTGGCCGTGGTCAAGAACCATACGATGGTTCACGAACAACTCAAGACCTTCTTCAACGGCTTTCGCCGTGACGCCCACCCGATGGCC…
152	ICMP19117	DEU	Plant	LJQB00000000		https://scd.landcareresearch.co.nz/	ATGGCTGACAAAAAAGCGCAGTTGATCATCGAGGGCGCTGCCCCCGTCGAGCTGCCAATTCTGACCGGTACAGTGGGTCCGGACGTGATCGACGTACGCGGCCTGACCGCCACCGGCCGCTTCACATTTGACCCTGGCTTCATGTCCACGGCCTCTTGCGATTCGAAGATCACCTACATCGATGGTGACAATGGCATTCTGCTACACCGCGGCTACCCGATCGAACAACTGGCCGAGCAGTCCGACTACCTGGAAACCTGCTACCTGCTGCTCAACGGTGAACTGCCCACCGCCGAGCAGAAAGCCCAGTTCGTGGCCGTGGTCAAGAACCACACGATGGTTCACGAACAGCTCAAGACCTTTTTCAACGGTTTCCGCCGTGACGCCCACCCGATGGCC…
153	784	PRT	Plant	KJ877795		Berge et al., 2014	CCCGTCGAGCTGCCAATTTTGCTGACCGGTACAGTGGGTCCGGACGTGATCGACGTACGCGGTCTGACCGCCACCGGCCGCTTCACATTTGACCCTGGTTTCATGTCCACGGCCTCTTGCGAGTCGAAGATCACCTACATCGATGGTGACAACGGAATTCTGCTGCACCGCGGCTACCCGATCGAACAACTGGCCGAGCAGTCCGATTATCTCGAGACCTGCTACCTGTTGCTCAACGGCGAGCTGCCAACCGCCGAACAGAAAGCCCAGTTCGTGGCCGTGGTCAAGAACCACACGATGGTTCACGAACAACTCAAGACCTTCTTCAACGGCTTTCGCCGTGACGCCCACCCGATGGCCGTCATGTGCGGTGTAGTCGGCGCCCTGTCGGCGTTCTAC…
153	CC1673	FRA	Plant	KJ877906		Berge et al., 2014	GGCGCTGCCCCCGTCGAGCTGCCAATACTGACCGGTACAGTGGGTCCGGACGTGATCGACGTACGCGGTCTGACCGCCACCGGCCGCTTCACATTTGACCCTGGTTTCATGTCCACGGCCTCTTGCGAGTCGAAGATCACCTACATCGATGGTGACAACGGAATTCTGCTGCACCGCGGCTACCCGATCGAACAACTGGCCGAGCAGTCCGATTATCTCGAGACCTGCTACCTGTTGCTCAACGGCGAGCTGCCAACCGCCGAACAGAAAGCCCAGTTCGTGGCCGTGGTCAAGAACCACACGATGGTTCACGAACAACTCAAGACCTTCTTCAACGGCTTTCGCCGTGACGCCCACCCGATGGCCGTCATGTGCGGTGTAGTCGGCGCCCTGTCGGCG…
153	CC1674	FRA	Plant	KJ877907		Berge et al., 2014	GAGGGCGCTGCCCCCGTCGAGCTGCCAATACTGACCGGTACAGTGGGTCCGGACGTGATCGACGTACGCGGTCTGACCGCCACCGGCCGCTTCACATTTGACCCTGGTTTCATGTCCACGGCCTCTTGCGAGTCGAAGATCACCTACATCGATGGTGACAACGGAATTCTGCTGCACCGCGGCTACCCGATCGAACAACTGGCCGAGCAGTCCGATTATCTCGAGACCTGCTACCTGTTGCTCAACGGCGAGCTGCCAACCGCCGAACAGAAAGCCCAGTTCGTGGCCGTGGTCAAGAACCACACGATGGTTCACGAACAACTCAAGACCTTCTTCAACGGCTTTCGCCGTGACGCCCACCCGATGGCCGTCATGTGCGGTGTAGTCGGCGCCCTGTCG…
153	CC1675	FRA	Plant	KJ877908		Berge et al., 2014	CTGCCCCCGTCGAGCTGCCAATACTGACCGGTACAGTGGGTCCGGACGTGATCGACGTACGCGGTCTGACCGCCACCGGCCGCTTCACATTTGACCCTGGTTTCATGTCCACGGCCTCTTGCGAGTCGAAGATCACCTACATCGATGGTGACAACGGAATTCTGCTGCACCGCGGCTACCCGATCGAACAACTGGCCGAGCAGTCCGATTATCTCGAGACCTGCTACCTGTTGCTCAACGGCGAGCTGCCAACCGCCGAACAGAAAGCCCAGTTCGTGGCCGTGGTCAAGAACCACACGATGGTTCACGAACAACTCAAGACCTTCTTCAACGGCTTTCGCCGTGACGCCCACCCGATGGCCGTCATGTGCGGTGTAGTCGGCGCCCTGTCGGCGTTCT…
153	CC1676	FRA	Plant	KJ877909		Berge et al., 2014	GCGCTGCCCCCGTCGAGCTGCCAATACTGACCGGTACAGTGGGTCCGGACGTGATCGACGTACGCGGTCTGACCGCCACCGGCCGCTTCACATTTGACCCTGGTTTCATGTCCACGGCCTCTTGCGAGTCGAAGATCACCTACATCGATGGTGACAACGGAATTCTGCTGCACCGCGGCTACCCGATCGAACAACTGGCCGAGCAGTCCGATTATCTCGAGACCTGCTACCTGTTGCTCAACGGCGAGCTGCCAACCGCCGAACAGAAAGCCCAGTTCGTGGCCGTGGTCAAGAACCACACGATGGTTCACGAACAACTCAAGACCTTCTTCAACGGCTTTCGCCGTGACGCCCACCCGATGGCCGTCATGTGCGGTGTAGTCGGCGCCCTGTCGGCGT…
153	CFBP7285	ITA	Plant	NA	http://pacu.facom.ufms.br/blast_kiwi/blast.html	Berge et al., 2014	CACCGGCCGCTTCACATTTGACCCTGGTTTCATGTCCACGGCCTCTTGCGAGTCGAAGATCACCTACATCGATGGTGACAACGGAATTCTGCTGCACCGCGGCTACCCGATCGAACAACTGGCCGAGCAGTCCGATTATCTCGAGACCTGCTACCTGTTGCTCAACGGCGAGCTGCCAACCGCCGAACAGAAAGCCCAGTTCGTGGCCGTGGTCAAGAACCACACGATGGTTCACGAACAACTCAAGACCTTCTTCAACGGCTTTCGCCGTGACGCCCACCCGATGGCCGTCATGTGCGGTGTAGTCGGCGCCCTGTCGGCGTTCTACCACGATTCGCTGGACATCAATAACCCGCAGCACCGCGAAATTTCGGCTGTACGCCTGGTCGCCAAGATGCC…
153	CFBP7286	ITA	Plant	AGNO01000006		Berge et al., 2014	ATGGCTGACAAAAAAGCGCAGTTGATCATCGAGGGCGCTGCCCCCGTCGAGCTGCCAATACTGACCGGTACAGTGGGTCCGGACGTGATCGACGTACGCGGTCTGACCGCCACCGGCCGCTTCACATTTGACCCTGGTTTCATGTCCACGGCCTCTTGCGAGTCGAAGATCACCTACATCGATGGTGACAACGGAATTCTGCTGCACCGCGGCTACCCGATCGAACAACTGGCCGAGCAGTCCGATTATCTCGAGACCTGCTACCTGTTGCTCAACGGCGAGCTGCCAACCGCCGAACAGAAAGCCCAGTTCGTGGCCGTGGTCAAGAACCACACGATGGTTCACGAACAACTCAAGACCTTCTTCAACGGCTTTCGCCGTGACGCCCACCCGATGGCC…
153	K93001	JPN	Plant	NA	http://genome.ppws.vt.edu/cgi-bin/MLST/home.pl	Berge et al., 2014	CACCGGCCGCTTCACATTTGACCCTGGTTTCATGTCCACGGCCTCTTGCGAGTCGAAGATCACCTACATCGATGGTGACAACGGAATTCTGCTGCACCGCGGCTACCCGATCGAACAACTGGCCGAGCAGTCCGATTATCTCGAGACCTGCTACCTGTTGCTCAACGGCGAGCTGCCAACCGCCGAACAGAAAGCCCAGTTCGTGGCCGTGGTCAAGAACCACACGATGGTTCACGAACAACTCAAGACCTTCTTCAACGGCTTTCGCCGTGACGCCCACCCGATGGCCGTCATGTGCGGTGTAGTCGGCGCCCTGTCGGCGTTCTACCACGATTCGCTGGACATCAATAACCCGCAGCACCGCGAAATTTCGGCTGTACGCCTGGTCGCCAAGATGCC…
153	CRA-FRU11.43	ITA	Plant	JX288002		Chapman et al, 2012	CCCGTCGAGCTGCCAATACTGACCGGTACAGTGGGTCCGGACGTGATCGACGTACGCGGTCTGACCGCCACCGGCCGCTTCACATTTGACCCTGGTTTCATGTCCACGGCCTCTTGCGAGTCGAAGATCACCTACATCGATGGTGACAACGGAATTCTGCTGCACCGCGGCTACCCGATCGAACAACTGGCCGAGCAGTCCGATTATCTCGAGACCTGCTACCTGTTGCTCAACGGCGAGCTGCCAACCGCCGAACAGAAAGCCCAGTTCGTGGCCGTGGTCAAGAACCACACGATGGTTCACGAACAACTCAAGACCTTCTTCAACGGCTTTCGCCGTGACGCCCACCCGATGGCCGTCATGTGCGGTGTAGTCGGCGCCCTGTCGGCGTTCTACCAC…
153	CRA-FRU8.76	ITA	Plant	JX287998		Chapman et al, 2012	CCCGTCGAGCTGCCAATACTGACCGGTACAGTGGGTCCGGACGTGATCGACGTACGCGGTCTGACCGCCACCGGCCGCTTCACATTTGACCCTGGTTTCATGTCCACGGCCTCTTGCGAGTCGAAGATCACCTACATCGATGGTGACAACGGAATTCTGCTGCACCGCGGCTACCCGATCGAACAACTGGCCGAGCAGTCCGATTATCTCGAGACCTGCTACCTGTTGCTCAACGGCGAGCTGCCAACCGCCGAACAGAAAGCCCAGTTCGTGGCCGTGGTCAAGAACCACACGATGGTTCACGAACAACTCAAGACCTTCTTCAACGGCTTTCGCCGTGACGCCCACCCGATGGCCGTCATGTGCGGTGTAGTCGGCGCCCTGTCGGCGTTCTACCAC…
153	KACC10584	KOR	Plant	JN683505		Chapman et al, 2012	CCCGTCGAGCTGCCAATACTGACCGGTACAGTGGGTCCGGACGTGATCGACGTACGCGGTCTGACCGCCACCGGCCGCTTCACATTTGACCCTGGTTTCATGTCCACGGCCTCTTGCGAGTCGAAGATCACCTACATCGATGGTGACAACGGAATTCTGCTGCACCGCGGCTACCCGATCGAACAACTGGCCGAGCAGTCCGATTATCTCGAGACCTGCTACCTGTTGCTCAACGGCGAGCTGCCAACCGCCGAACAGAAAGCCCAGTTCGTGGCCGTGGTCAAGAACCACACGATGGTTCACGAACAACTCAAGACCTTCTTCAACGGCTTTCGCCGTGACGCCCACCCGATGGCCGTCATGTGCGGTGTAGTCGGCGCCCTGTCGGCGTTCTACCAC…
153	KACC10594	KOR	Plant	JN683506		Chapman et al, 2012	CCCGTCGAGCTGCCAATACTGACCGGTACAGTGGGTCCGGACGTGATCGACGTACGCGGTCTGACCGCCACCGGCCGCTTCACATTTGACCCTGGTTTCATGTCCACGGCCTCTTGCGAGTCGAAGATCACCTACATCGATGGTGACAACGGAATTCTGCTGCACCGCGGCTACCCGATCGAACAACTGGCCGAGCAGTCCGATTATCTCGAGACCTGCTACCTGTTGCTCAACGGCGAGCTGCCAACCGCCGAACAGAAAGCCCAGTTCGTGGCCGTGGTCAAGAACCACACGATGGTTCACGAACAACTCAAGACCTTCTTCAACGGCTTTCGCCGTGACGCCCACCCGATGGCCGTCATGTGCGGTGTAGTCGGCGCCCTGTCGGCGTTCTACCAC…
153	KACC10754	KOR	Plant	JN683507		Chapman et al, 2012	CCCGTCGAGCTGCCAATACTGACCGGTACAGTGGGTCCGGACGTGATCGACGTACGCGGTCTGACCGCCACCGGCCGCTTCACATTTGACCCTGGTTTCATGTCCACGGCCTCTTGCGAGTCGAAGATCACCTACATCGATGGTGACAACGGAATTCTGCTGCACCGCGGCTACCCGATCGAACAACTGGCCGAGCAGTCCGATTATCTCGAGACCTGCTACCTGTTGCTCAACGGCGAGCTGCCAACCGCCGAACAGAAAGCCCAGTTCGTGGCCGTGGTCAAGAACCACACGATGGTTCACGAACAACTCAAGACCTTCTTCAACGGCTTTCGCCGTGACGCCCACCCGATGGCCGTCATGTGCGGTGTAGTCGGCGCCCTGTCGGCGTTCTACCAC…
153	Psa1A	CHL	Plant	JQ836616		Chapman et al, 2012	CCCGTCGAGCTGCCAATACTGACCGGTACAGTGGGTCCGGACGTGATCGACGTACGCGGTCTGACCGCCACCGGCCGCTTCACATTTGACCCTGGTTTCATGTCCACGGCCTCTTGCGAGTCGAAGATCACCTACATCGATGGTGACAACGGAATTCTGCTGCACCGCGGCTACCCGATCGAACAACTGGCCGAGCAGTCCGATTATCTCGAGACCTGCTACCTGTTGCTCAACGGCGAGCTGCCAACCGCCGAACAGAAAGCCCAGTTCGTGGCCGTGGTCAAGAACCACACGATGGTTCACGAACAACTCAAGACCTTCTTCAACGGCTTTCGCCGTGACGCCCACCCGATGGCCGTCATGTGCGGTGTAGTCGGCGCCCTGTCGGCGTTCTACCAC…
153	T10_04758	NZL	Plant	JN683493		Chapman et al, 2012	CCCGTCGAGCTGCCAATACTGACCGGTACAGTGGGTCCGGACGTGATCGACGTACGCGGTCTGACCGCCACCGGCCGCTTCACATTTGACCCTGGTTTCATGTCCACGGCCTCTTGCGAGTCGAAGATCACCTACATCGATGGTGACAACGGAATTCTGCTGCACCGCGGCTACCCGATCGAACAACTGGCCGAGCAGTCCGATTATCTCGAGACCTGCTACCTGTTGCTCAACGGCGAGCTGCCAACCGCCGAACAGAAAGCCCAGTTCGTGGCCGTGGTCAAGAACCACACGATGGTTCACGAACAACTCAAGACCTTCTTCAACGGCTTTCGCCGTGACGCCCACCCGATGGCCGTCATGTGCGGTGTAGTCGGCGCCCTGTCGGCGTTCTACCAC…
153	T10_05815	NZL	Plant	JX287988		Chapman et al, 2012	CCCGTCGAGCTGCCAATACTGACCGGTACAGTGGGTCCGGACGTGATCGACGTACGCGGTCTGACCGCCACCGGCCGCTTCACATTTGACCCTGGTTTCATGTCCACGGCCTCTTGCGAGTCGAAGATCACCTACATCGATGGTGACAACGGAATTCTGCTGCACCGCGGCTACCCGATCGAACAACTGGCCGAGCAGTCCGATTATCTCGAGACCTGCTACCTGTTGCTCAACGGCGAGCTGCCAACCGCCGAACAGAAAGCCCAGTTCGTGGCCGTGGTCAAGAACCACACGATGGTTCACGAACAACTCAAGACCTTCTTCAACGGCTTTCGCCGTGACGCCCACCCGATGGCCGTCATGTGCGGTGTAGTCGGCGCCCTGTCGGCGTTCTACCAC…
153	T11_01395A	CHL	Plant	JQ836619		Chapman et al, 2012	CCCGTCGAGCTGCCAATACTGACCGGTACAGTGGGTCCGGACGTGATCGACGTACGCGGTCTGACCGCCACCGGCCGCTTCACATTTGACCCTGGTTTCATGTCCACGGCCTCTTGCGAGTCGAAGATCACCTACATCGATGGTGACAACGGAATTCTGCTGCACCGCGGCTACCCGATCGAACAACTGGCCGAGCAGTCCGATTATCTCGAGACCTGCTACCTGTTGCTCAACGGCGAGCTGCCAACCGCCGAACAGAAAGCCCAGTTCGTGGCCGTGGTCAAGAACCACACGATGGTTCACGAACAACTCAAGACCTTCTTCAACGGCTTTCGCCGTGACGCCCACCCGATGGCCGTCATGTGCGGTGTAGTCGGCGCCCTGTCGGCGTTCTACCAC…
153	CFBP2353	JPN	Plant	AOJV00000000		https://cirm-cfbp.fr/	ATGGCTGACAAAAAAGCGCAGTTGATCATCGAGGGCGCTGCCCCCGTCGAGCTGCCAATACTGACCGGTACAGTGGGTCCGGACGTGATCGACGTACGCGGTCTGACCGCCACCGGCCGCTTCACATTTGACCCTGGTTTCATGTCCACGGCCTCTTGCGAGTCGAAGATCACCTACATCGATGGTGACAACGGAATTCTGCTGCACCGCGGCTACCCGATCGAACAACTGGCCGAGCAGTCCGATTATCTCGAGACCTGCTACCTGTTGCTCAACGGCGAGCTGCCAACCGCCGAACAGAAAGCCCAGTTCGTGGCCGTGGTCAAGAACCACACGATGGTTCACGAACAACTCAAGACCTTCTTCAACGGCTTTCGCCGTGACGCCCACCCGATGGCC…
153	CFBP7287	ITA	Plant	KF937507		https://cirm-cfbp.fr/	GTACGCGGTCTGACCGCCACCGGCCGCTTCACATTTGACCCTGGTTTCATGTCCACGGCCTCTTGCGAGTCGAAGATCACCTACATCGATGGTGACAACGGAATTCTGCTGCACCGCGGCTACCCGATCGAACAACTGGCCGAGCAGTCCGATTATCTCGAGACCTGCTACCTGTTGCTCAACGGCGAGCTGCCAACCGCCGAACAGAAAGCCCAGTTCGTGGCCGTGGTCAAGAACCACACGATGGTTCACGAACAACTCAAGACCTTCTTCAACGGCTTTCGCCGTGACGCCCACCCGATGGCCGTCATGTGCGGTGTAGTCGGCGCCCTGTCGGCGTTCTACCACGATTCGCTGGACATCAATAACCCGCAGCACCGCGAAATTTCGGCTGTACGC…
153	CFBP7811	NZL	Plant	KF937508		https://cirm-cfbp.fr/	GTACGCGGTCTGACCGCCACCGGCCGCTTCACATTTGACCCTGGTTTCATGTCCACGGCCTCTTGCGAGTCGAAGATCACCTACATCGATGGTGACAACGGAATTCTGCTGCACCGCGGCTACCCGATCGAACAACTGGCCGAGCAGTCCGATTATCTCGAGACCTGCTACCTGTTGCTCAACGGCGAGCTGCCAACCGCCGAACAGAAAGCCCAGTTCGTGGCCGTGGTCAAGAACCACACGATGGTTCACGAACAACTCAAGACCTTCTTCAACGGCTTTCGCCGTGACGCCCACCCGATGGCCGTCATGTGCGGTGTAGTCGGCGCCCTGTCGGCGTTCTACCACGATTCGCTGGACATCAATAACCCGCAGCACCGCGAAATTTCGGCTGTACGC…
153	CFBP7906	FRA	Plant	KF937515		https://cirm-cfbp.fr/	GTACGCGGTCTGACCGCCACCGGCCGCTTCACATTTGACCCTGGTTTCATGTCCACGGCCTCTTGCGAGTCGAAGATCACCTACATCGATGGTGACAACGGAATTCTGCTGCACCGCGGCTACCCGATCGAACAACTGGCCGAGCAGTCCGATTATCTCGAGACCTGCTACCTGTTGCTCAACGGCGAGCTGCCAACCGCCGAACAGAAAGCCCAGTTCGTGGCCGTGGTCAAGAACCACACGATGGTTCACGAACAACTCAAGACCTTCTTCAACGGCTTTCGCCGTGACGCCCACCCGATGGCCGTCATGTGCGGTGTAGTCGGCGCCCTGTCGGCGTTCTACCACGATTCGCTGGACATCAATAACCCGCAGCACCGCGAAATTTCGGCTGTACGC…
153	MAFF212054	JPN	Plant	PESZ00000000		https://www.gene.affrc.go.jp/databases-micro_search_en.php	CCCGTCGAGCTGCCAATACTGACCGGTACAGTGGGTCCGGACGTGATCGACGTACGCGGTCTGACCGCCACCGGCCGCTTCACATTTGACCCTGGTTTCATGTCCACGGCCTCTTGCGAGTCGAAGATCACCTACATCGATGGTGACAACGGAATTCTGCTGCACCGCGGCTACCCGATCGAACAACTGGCCGAGCAGTCCGATTATCTCGAGACCTGCTACCTGTTGCTCAACGGCGAGCTGCCAACCGCCGAACAGAAAGCCCAGTTCGTGGCCGTGGTCAAGAACCACACGATGGTTCACGAACAACTCAAGACCTTCTTCAACGGCTTTCGCCGTGACGCCCACCCGATGGCCGTCATGTGCGGTGTAGTCGGCGCCCTGTCGGCGTTCTACCAC…
153	MAFF212057	JPN	Plant	JAAEYO000000000		https://www.gene.affrc.go.jp/databases-micro_search_en.php	CCCGTCGAGCTGCCAATACTGACCGGTACAGTGGGTCCGGACGTGATCGACGTACGCGGTCTGACCGCCACCGGCCGCTTCACATTTGACCCTGGTTTCATGTCCACGGCCTCTTGCGAGTCGAAGATCACCTACATCGATGGTGACAACGGAATTCTGCTGCACCGCGGCTACCCGATCGAACAACTGGCCGAGCAGTCCGATTATCTCGAGACCTGCTACCTGTTGCTCAACGGCGAGCTGCCAACCGCCGAACAGAAAGCCCAGTTCGTGGCCGTGGTCAAGAACCACACGATGGTTCACGAACAACTCAAGACCTTCTTCAACGGCTTTCGCCGTGACGCCCACCCGATGGCCGTCATGTGCGGTGTAGTCGGCGCCCTGTCGGCGTTCTACCAC…
153	MAFF212063	JPN	Plant	CP024712		https://www.gene.affrc.go.jp/databases-micro_search_en.php	CCCGTCGAGCTGCCAATACTGACCGGTACAGTGGGTCCGGACGTGATCGACGTACGCGGTCTGACCGCCACCGGCCGCTTCACATTTGACCCTGGTTTCATGTCCACGGCCTCTTGCGAGTCGAAGATCACCTACATCGATGGTGACAACGGAATTCTGCTGCACCGCGGCTACCCGATCGAACAACTGGCCGAGCAGTCCGATTATCTCGAGACCTGCTACCTGTTGCTCAACGGCGAGCTGCCAACCGCCGAACAGAAAGCCCAGTTCGTGGCCGTGGTCAAGAACCACACGATGGTTCACGAACAACTCAAGACCTTCTTCAACGGCTTTCGCCGTGACGCCCACCCGATGGCCGTCATGTGCGGTGTAGTCGGCGCCCTGTCGGCGTTCTACCAC…
153	MAFF212101	JPN	Plant	LC008157		https://www.gene.affrc.go.jp/databases-micro_search_en.php	CCCGTCGAGCTGCCAATACTGACCGGTACAGTGGGTCCGGACGTGATCGACGTACGCGGTCTGACCGCCACCGGCCGCTTCACATTTGACCCTGGTTTCATGTCCACGGCCTCTTGCGAGTCGAAGATCACCTACATCGATGGTGACAACGGAATTCTGCTGCACCGCGGCTACCCGATCGAACAACTGGCCGAGCAGTCCGATTATCTCGAGACCTGCTACCTGTTGCTCAACGGCGAGCTGCCAACCGCCGAACAGAAAGCCCAGTTCGTGGCCGTGGTCAAGAACCACACGATGGTTCACGAACAACTCAAGACCTTCTTCAACGGCTTTCGCCGTGACGCCCACCCGATGGCCGTCATGTGCGGTGTAGTCGGCGCCCTGTCGGCGTTCTACCAC…
153	MAFF212111	JPN	Plant	PGSQ00000000		https://www.gene.affrc.go.jp/databases-micro_search_en.php	CCCGTCGAGCTGCCAATACTGACCGGTACAGTGGGTCCGGACGTGATCGACGTACGCGGTCTGACCGCCACCGGCCGCTTCACATTTGACCCTGGTTTCATGTCCACGGCCTCTTGCGAGTCGAAGATCACCTACATCGATGGTGACAACGGAATTCTGCTGCACCGCGGCTACCCGATCGAACAACTGGCCGAGCAGTCCGATTATCTCGAGACCTGCTACCTGTTGCTCAACGGCGAGCTGCCAACCGCCGAACAGAAAGCCCAGTTCGTGGCCGTGGTCAAGAACCACACGATGGTTCACGAACAACTCAAGACCTTCTTCAACGGCTTTCGCCGTGACGCCCACCCGATGGCCGTCATGTGCGGTGTAGTCGGCGCCCTGTCGGCGTTCTACCAC…
153	MAFF212132	JPN	Plant	LC065050		https://www.gene.affrc.go.jp/databases-micro_search_en.php	CCCGTCGAGCTGCCAATACTGACCGGTACAGTGGGTCCGGACGTGATCGACGTACGCGGTCTGACCGCCACCGGCCGCTTCACATTTGACCCTGGTTTCATGTCCACGGCCTCTTGCGAGTCGAAGATCACCTACATCGATGGTGACAACGGAATTCTGCTGCACCGCGGCTACCCGATCGAACAACTGGCCGAGCAGTCCGATTATCTCGAGACCTGCTACCTGTTGCTCAACGGCGAGCTGCCAACCGCCGAACAGAAAGCCCAGTTCGTGGCCGTGGTCAAGAACCACACGATGGTTCACGAACAACTCAAGACCTTCTTCAACGGCTTTCGCCGTGACGCCCACCCGATGGCCGTCATGTGCGGTGTAGTCGGCGCCCTGTCGGCGTTCTACCAC…
153	MAFF212140	JPN	Plant	LC065054		https://www.gene.affrc.go.jp/databases-micro_search_en.php	CCCGTCGAGCTGCCAATACTGACCGGTACAGTGGGTCCGGACGTGATCGACGTACGCGGTCTGACCGCCACCGGCCGCTTCACATTTGACCCTGGTTTCATGTCCACGGCCTCTTGCGAGTCGAAGATCACCTACATCGATGGTGACAACGGAATTCTGCTGCACCGCGGCTACCCGATCGAACAACTGGCCGAGCAGTCCGATTATCTCGAGACCTGCTACCTGTTGCTCAACGGCGAGCTGCCAACCGCCGAACAGAAAGCCCAGTTCGTGGCCGTGGTCAAGAACCACACGATGGTTCACGAACAACTCAAGACCTTCTTCAACGGCTTTCGCCGTGACGCCCACCCGATGGCCGTCATGTGCGGTGTAGTCGGCGCCCTGTCGGCGTTCTACCAC…
154	M4a	USA	Plant	LGLE00000000		Berge et al., 2014	CTGCCCCCGTCGAGCTGCCAATTCTGACGGGTACAGTCGGTCCGGACGTGATCGACGTACGCGGTCTTACCGCCACCGGCCGCTTCACATTTGACCCTGGCTTCATGTCCACGGCATCTTGCGAGTCGAAGATCACCTACATCGATGGTGATAACGGAATCCTGCTTCATCGCGGCTACCCGATCGAACAACTGGCCGAGCAGTCCGATTACCTGGAAACCTGCTACCTGCTGCTCAATGGCGAACTGCCAACTGCCGAGCAGAAAGCCCAGTTCGTCGCCGTGGTCAAGAACCACACGATGGTCCACGAACAGCTCAAGACCTTTTTCAACGGTTTTCGCCGTGATGCCCACCCGATGGCCGTCATGTGTGGCGTCGTCGGCGCCCTGTCGGCGTTCT…
154	PmaES4326	USA	Plant	AEAK00000000		Berge et al., 2014	ATGGCTGACAAAAAAGCGCAGTTGATCATCGAGGGCGCTGCCCCCGTCGAGCTGCCAATTCTGACGGGTACAGTCGGTCCGGACGTGATCGACGTACGCGGTCTTACCGCCACCGGCCGCTTCACATTTGACCCTGGCTTCATGTCCACGGCATCTTGCGAGTCGAAGATCACCTACATCGATGGTGATAACGGAATCCTGCTTCATCGCGGCTACCCGATCGAACAACTGGCCGAGCAGTCCGATTACCTGGAAACCTGCTACCTGCTGCTCAATGGCGAACTGCCAACTGCCGAGCAGAAAGCCCAGTTCGTCGCCGTGGTCAAGAACCACACGATGGTCCACGAACAGCTCAAGACCTTTTTCAACGGTTTTCGCCGTGATGCCCACCCGATGGCC…
154	PmaYM7930	JPN	Plant	NA	http://genome.ppws.vt.edu/cgi-bin/MLST/home.pl	Berge et al., 2014	ATGGCTGACAAAAAAGCGCAGTTGATCATCGAGGGCGCTGCCCCCGTCGAGCTGCCAATTCTGACGGGTACAGTCGGTCCGGACGTGATCGACGTACGCGGTCTTACCGCCACCGGCCGCTTCACATTTGACCCTGGCTTCATGTCCACGGCATCTTGCGAGTCGAAGATCACCTACATCGATGGTGATAACGGAATCCTGCTTCATCGCGGCTACCCGATCGAACAACTGGCCGAGCAGTCCGATTACCTGGAAACCTGCTACCTGCTGCTCAATGGCGAACTGCCAACTGCCGAGCAGAAAGCCCAGTTCGTCGCCGTGGTCAAGAACCACACGATGGTCCACGAACAGCTCAAGACCTTTTTCAACGGTTTTCGCCGTGATGCCCACCCGATGGCC…
155	CCE0217	FRA	Freshwater	KJ877959		Berge et al., 2014	GCCCCCGTCGAGCTGCCAATTCTGACGGGTACAGTCGGTCCGGACGTGATCGACGTACGCGGTCTTACCGCCACCGGCCGCTTCACATTTGACCCTGGCTTCATGTCCACGGCATCTTGCGAGTCGAAGATCACCTACATCGATGGTGATAACGGAATCCTGCTTCACCGCGGCTACCCGATCGAGCAACTGGCAGAGCAGTCCGATTACCTGGAAACCTGCTACCTGCTGCTCAATGGCGAACTGCCGACTGCCGAGCAGAAAGCCCAGTTCGTCGCCGTGGTCAAGAACCACACAATGGTTCACGAACAGCTCAAGACCTTTTTCAACGGTTTCCGCCGTGATGCCCACCCGATGGCCGTCATGTGTGGCGTCGTCGGCGCCCTGTCGGCGTTCTAT…
155	JFJ-0011	CHE	Snowfall	KY379250		Stopelli et al, 2017	GAGGGCGCTGCCCCCGTCGAGCTGCCAATACTGACCGGTACAGTGGGTCCGGACGTGATCGACGTACGCGGTCTGACCGCCACCGGCCGCTTCACATTTGACCCTGGCTTCATGTCCACGGCCTCTTGCGAGTCGAAGATCACCTACATTGATGGTGACAACGGAATTCTGCTGCACCGCGGCTACCCGATCGAACAACTGGCCGAGCAGTCCGATTACCTCGAGACCTGCTACCTGCTGCTCAACGGCGAGCTGCCAACCGCCGAACAGAAAGCCCAGTTCGTGGCCGTGGTCAAGAACCACACGATGGTTCACGAACAACTCAAGACCTTCTTCAACGGCTTTCGCCGTGACGCCCACCCGATGGCCGTCATGTGCGGTGTAGTTGGCGCCCTGTCG…
156	CC1557	FRA	Snowpack	AVEH00000000		Berge et al., 2014	ATGGCTGAGAAAAAAGCGCAGTTGATCATCGAGGGTGCTGCCCCCGTCGAGCTGCCAATTCTGACGGGTACAGTGGGTCCGGACGTGATCGACGTACGCGGTCTCACCGCCACCGGCCGCTTCACATTTGACCCTGGCTTCATGTCCACGGCATCTTGCGAGTCGAAGATCACCTACATCGATGGTGATAACGGAATTCTGCTTCACCGCGGCTACCCGATCGAACAACTGGCCGAGCAGTCCGATTATCTGGAAACCTGCTACCTGCTGCTCAATGGCGAATTGCCAACCGCCGAGCAGAAAGCCCAGTTCGTTGCCGTGGTCAAAAACCACACGATGGTTCACGAACAGCTCAAGACCTTTTTCAACGGTTTCCGCCGTGATGCCCACCCGATGGCC…
156	CCE0608	FRA	Snowpack	KJ877987		Berge et al., 2014	GAGGGCGCTGCCCCCGTCGAGCTGCCAATTCTGACGGGTACAGTGGGTCCGGACGTGATCGACGTACGCGGTCTCACCGCCACCGGCCGCTTCACATTTGACCCTGGCTTCATGTCCACGGCATCTTGCGAGTCGAAGATCACCTACATCGATGGTGATAACGGAATTCTGCTTCACCGCGGCTACCCGATCGAACAACTGGCCGAGCAGTCCGATTATCTGGAAACCTGCTACCTGCTGCTCAATGGCGAATTGCCAACCGCCGAGCAGAAAGCCCAGTTCGTTGCCGTGGTCAAAAACCACACGATGGTTCACGAACAGCTCAAGACCTTTTTCAACGGTTTCCGCCGTGATGCCCACCCGATGGCCGTCATGTGCGGCGTAGTCGGCGCCCTGTCG…
156	CCE0735	FRA	Snowpack	KJ878015		Berge et al., 2014	GACGTACGCGGTCTCACCGCCACCGGCCGCTTCACATTTGACCCTGGCTTCATGTCCACGGCATCTTGCGAGTCGAAGATCACCTACATCGATGGTGATAACGGAATTCTGCTTCACCGCGGCTACCCGATCGAACAACTGGCCGAGCAGTCCGATTATCTGGAAACCTGCTACCTGCTGCTCAATGGCGAATTGCCAACCGCCGAGCAGAAAGCCCAGTTCGTTGCCGTGGTCAAAAACCACACGATGGTTCACGAACAGCTCAAGACCTTTTTCAACGGTTTCCGCCGTGATGCCCACCCGATGGCCGTCATGTGCGGCGTAGTCGGCGCCCTGTCGGCGTTCTATCACGACTCGCTGGACATCAACAACCCGCAGCACCGCGAGATTTCTGCCGTG…
156	CCV0061	FRA	Freshwater	KJ878046		Berge et al., 2014	GCCCCCGTCGAGCTGCCAATTCTGACGGGTACAGTGGGTCCGGACGTGATCGACGTACGCGGTCTCACCGCCACCGGCCGCTTCACATTTGACCCTGGCTTCATGTCCACGGCATCTTGCGAGTCGAAGATCACCTACATCGATGGTGATAACGGAATTCTGCTTCACCGCGGCTACCCGATCGAACAACTGGCCGAGCAGTCCGATTATCTGGAAACCTGCTACCTGCTGCTCAATGGCGAATTGCCAACCGCCGAGCAGAAAGCCCAGTTCGTTGCCGTGGTCAAAAACCACACGATGGTTCACGAACAGCTCAAGACCTTTTTCAACGGTTTCCGCCGTGATGCCCACCCGATGGCCGTCATGTGCGGCGTAGTCGGCGCCCTGTCGGCGTTCTAT…
156	CCV0103	FRA	Freshwater	KJ878055		Berge et al., 2014	GCCCCCGTCGAGCTGCCAATTCTGACGGGTACAGTGGGTCCGGACGTGATCGACGTACGCGGTCTCACCGCCACCGGCCGCTTCACATTTGACCCTGGCTTCATGTCCACGGCATCTTGCGAGTCGAAGATCACCTACATCGATGGTGATAACGGAATTCTGCTTCACCGCGGCTACCCGATCGAACAACTGGCCGAGCAGTCCGATTATCTGGAAACCTGCTACCTGCTGCTCAATGGCGAATTGCCAACCGCCGAGCAGAAAGCCCAGTTCGTTGCCGTGGTCAAAAACCACACGATGGTTCACGAACAGCTCAAGACCTTTTTCAACGGTTTCCGCCGTGATGCCCACCCGATGGCCGTCATGTGCGGCGTAGTCGGCGCCCTGTCGGCGTTCTAT…
156	CLA0200	FRA	Snowpack	KJ878116		Berge et al., 2014	GAGGGCGCTGCCCCCGTCGAGCTGCCAATTCTGACGGGTACAGTGGGTCCGGACGTGATCGACGTACGCGGTCTCACCGCCACCGGCCGCTTCACATTTGACCCTGGCTTCATGTCCACGGCATCTTGCGAGTCGAAGATCACCTACATCGATGGTGATAACGGAATTCTGCTTCACCGCGGCTACCCGATCGAACAACTGGCCGAGCAGTCCGATTATCTGGAAACCTGCTACCTGCTGCTCAATGGCGAATTGCCAACCGCCGAGCAGAAAGCCCAGTTCGTTGCCGTGGTCAAAAACCACACGATGGTTCACGAACAGCTCAAGACCTTTTTCAACGGTTTCCGCCGTGATGCCCACCCGATGGCCGTCATGTGCGGCGTAGTCGGCGCCCTGTCG…
156	CLA0326	FRA	Leaf_litter	KJ878136		Berge et al., 2014	GTCTCACCGCCACCGGCCGCTTCACATTTGACCCTGGCTTCATGTCCACGGCATCTTGCGAGTCGAAGATCACCTACATCGATGGTGATAACGGAATTCTGCTTCACCGCGGCTACCCGATCGAACAACTGGCCGAGCAGTCCGATTATCTGGAAACCTGCTACCTGCTGCTCAATGGCGAATTGCCAACCGCCGAGCAGAAAGCCCAGTTCGTTGCCGTGGTCAAAAACCACACGATGGTTCACGAACAGCTCAAGACCTTTTTCAACGGTTTCCGCCGTGATGCCCACCCGATGGCCGTCATGTGCGGCGTAGTCGGCGCCCTGTCGGCGTTCTATCACGACTCGCTGGACATCAACAACCCGCAGCACCGCGAGATTTCTGCCGTGCGCCTGGTCG…
156	CSZ0253	FRA	Freshwater	KJ878218		Berge et al., 2014	GCCCCCGTCGAGCTGCCAATTCTGACGGGTACAGTGGGTCCGGACGTGATCGACGTACGCGGTCTCACCGCCACCGGCCGCTTCACATTTGACCCTGGCTTCATGTCCACGGCATCTTGCGAGTCGAAGATCACCTACATCGATGGTGATAACGGAATTCTGCTTCACCGCGGCTACCCGATCGAACAACTGGCCGAGCAGTCCGATTATCTGGAAACCTGCTACCTGCTGCTCAATGGCGAATTGCCAACCGCCGAGCAGAAAGCCCAGTTCGTTGCCGTGGTCAAAAACCACACGATGGTTCACGAACAGCTCAAGACCTTTTTCAACGGTTTCCGCCGTGATGCCCACCCGATGGCCGTCATGTGCGGCGTAGTCGGCGCCCTGTCGGCGTTCTAT…
156	CSZ0287	FRA	Snowpack	KJ878228		Berge et al., 2014	GAGGGCGCTGCCCCCGTCGAGCTGCCAATTCTGACGGGTACAGTGGGTCCGGACGTGATCGACGTACGCGGTCTCACCGCCACCGGCCGCTTCACATTTGACCCTGGCTTCATGTCCACGGCATCTTGCGAGTCGAAGATCACCTACATCGATGGTGATAACGGAATTCTGCTTCACCGCGGCTACCCGATCGAACAACTGGCCGAGCAGTCCGATTATCTGGAAACCTGCTACCTGCTGCTCAATGGCGAATTGCCAACCGCCGAGCAGAAAGCCCAGTTCGTTGCCGTGGTCAAAAACCACACGATGGTTCACGAACAGCTCAAGACCTTTTTCAACGGTTTCCGCCGTGATGCCCACCCGATGGCCGTCATGTGCGGCGTAGTCGGCGCCCTGTCG…
156	CSZ0290	FRA	Snowpack	KJ878231		Berge et al., 2014	GAGGGCGCTGCCCCCGTCGAGCTGCCAATTCTGACGGGTACAGTGGGTCCGGACGTGATCGACGTACGCGGTCTCACCGCCACCGGCCGCTTCACATTTGACCCTGGCTTCATGTCCACGGCATCTTGCGAGTCGAAGATCACCTACATCGATGGTGATAACGGAATTCTGCTTCACCGCGGCTACCCGATCGAACAACTGGCCGAGCAGTCCGATTATCTGGAAACCTGCTACCTGCTGCTCAATGGCGAATTGCCAACCGCCGAGCAGAAAGCCCAGTTCGTTGCCGTGGTCAAAAACCACACGATGGTTCACGAACAGCTCAAGACCTTTTTCAACGGTTTCCGCCGTGATGCCCACCCGATGGCCGTCATGTGCGGCGTAGTCGGCGCCCTGTCG…
156	CSZ0335	FRA	Freshwater	KJ878254		Berge et al., 2014	GCCCCCGTCGAGCTGCCAATTCTGACGGGTACAGTGGGTCCGGACGTGATCGACGTACGCGGTCTCACCGCCACCGGCCGCTTCACATTTGACCCTGGCTTCATGTCCACGGCATCTTGCGAGTCGAAGATCACCTACATCGATGGTGATAACGGAATTCTGCTTCACCGCGGCTACCCGATCGAACAACTGGCCGAGCAGTCCGATTATCTGGAAACCTGCTACCTGCTGCTCAATGGCGAATTGCCAACCGCCGAGCAGAAAGCCCAGTTCGTTGCCGTGGTCAAAAACCACACGATGGTTCACGAACAGCTCAAGACCTTTTTCAACGGTTTCCGCCGTGATGCCCACCCGATGGCCGTCATGTGCGGCGTAGTCGGCGCCCTGTCGGCGATCTAT…
156	CSZ0714	FRA	Snowpack	KJ878271		Berge et al., 2014	GAGGGCGCTGCCCCCGTCGAGCTGCCAATTCTGACGGGTACAGTGGGTCCGGACGTGATCGACGTACGCGGTCTCACCGCCACCGGCCGCTTCACATTTGACCCTGGCTTCATGTCCACGGCATCTTGCGAGTCGAAGATCACCTACATCGATGGTGATAACGGAATTCTGCTTCACCGCGGCTACCCGATCGAACAACTGGCCGAGCAGTCCGATTATCTGGAAACCTGCTACCTGCTGCTCAATGGCGAATTGCCAACCGCCGAGCAGAAAGCCCAGTTCGTTGCCGTGGTCAAAAACCACACGATGGTTCACGAACAGCTCAAGACCTTTTTCAACGGTTTCCGCCGTGATGCCCACCCGATGGCCGTCATGTGCGGCGTAGTCGGCGCCCTGTCG…
156	CSZ0718	FRA	Snowpack	KJ878273		Berge et al., 2014	GACGTACGCGGTCTCACCGCCACCGGCCGCTTCACATTTGACCCTGGCTTCATGTCCACGGCATCTTGCGAGTCGAAGATCACCTACATCGATGGTGATAACGGAATTCTGCTTCACCGCGGCTACCCGATCGAACAACTGGCCGAGCAGTCCGATTATCTGGAAACCTGCTACCTGCTGCTCAATGGCGAATTGCCAACCGCCGAGCAGAAAGCCCAGTTCGTTGCCGTGGTCAAAAACCACACGATGGTTCACGAACAGCTCAAGACCTTTTTCAACGGTTTCCGCCGTGATGCCCACCCGATGGCCGTCATGTGCGGCGTAGTCGGCGCCCTGTCGGCGTTCTATCACGACTCGCTGGACATCAACAACCCGCAGCACCGCGAGATTTCTGCCGTG…
156	CSZ0723	FRA	Snowpack	KJ878275		Berge et al., 2014	GAGGGCGCTGCCCCCGTCGAGCTGCCAATTCTGACGGGTACAGTGGGTCCGGACGTGATCGACGTACGCGGTCTCACCGCCACCGGCCGCTTCACATTTGACCCTGGCTTCATGTCCACGGCATCTTGCGAGTCGAAGATCACCTACATCGATGGTGATAACGGAATTCTGCTTCACCGCGGCTACCCGATCGAACAACTGGCCGAGCAGTCCGATTATCTGGAAACCTGCTACCTGCTGCTCAATGGCGAATTGCCAACCGCCGAGCAGAAAGCCCAGTTCGTTGCCGTGGTCAAAAACCACACGATGGTTCACGAACAGCTCAAGACCTTTTTCAACGGTTTCCGCCGTGATGCCCACCCGATGGCCGTCATGTGCGGCGTAGTCGGCGCCCTGTCG…
156	CSZ0897	FRA	Snowpack	KJ878288		Berge et al., 2014	TGATCGACGTACGCGGTCTCACCGCCACCGGCCGCTTCACATTTGACCCTGGCTTCATGTCCACGGCATCTTGCGAGTCGAAGATCACCTACATCGATGGTGATAACGGAATTCTGCTTCACCGCGGCTACCCGATCGAACAACTGGCCGAGCAGTCCGATTATCTGGAAACCTGCTACCTGCTGCTCAATGGCGAATTGCCAACCGCCGAGCAGAAAGCCCAGTTCGTTGCCGTGGTCAAAAACCACACGATGGTTCACGAACAGCTCAAGACCTTTTTCAACGGTTTCCGCCGTGATGCCCACCCGATGGCCGTCATGTGCGGCGTAGTCGGCGCCCTGTCGGCGTTCTATCACGACTCGCTGGACATCAACAACCCGCAGCACCGCGAGATTTCTG…
156	CVB0040	FRA	Biofilm	KJ878306		Berge et al., 2014	GAGGGCGCTGCCCCCGTCGAGCTGCCAATTCTGACGGGTACAGTGGGTCCGGACGTGATCGACGTACGCGGTCTCACCGCCACCGGCCGCTTCACATTTGACCCTGGCTTCATGTCCACGGCATCTTGCGAGTCGAAGATCACCTACATCGATGGTGATAACGGAATTCTGCTTCACCGCGGCTACCCGATCGAACAACTGGCCGAGCAGTCCGATTATCTGGAAACCTGCTACCTGCTGCTCAATGGCGAATTGCCAACCGCCGAGCAGAAAGCCCAGTTCGTTGCCGTGGTCAAAAACCACACGATGGTTCACGAACAGCTCAAGACCTTTTTCAACGGTTTCCGCCGTGATGCCCACCCGATGGCCGTCATGTGCGGCGTAGTCGGCGCCCTGTCG…
156	TA0018	FRA	Freshwater	KJ878496		Berge et al., 2014	GATCGACGTACGCGGTCTCACCGCCACCGGCCGCTTCACATTTGACCCTGGCTTCATGTCCACGGCATCTTGCGAGTCGAAGATCACCTACATCGATGGTGATAACGGAATTCTGCTTCACCGCGGCTACCCGATCGAACAACTGGCCGAGCAGTCCGATTATCTGGAAACCTGCTACCTGCTGCTCAATGGCGAATTGCCAACCGCCGAGCAGAAAGCCCAGTTCGTTGCCGTGGTCAAAAACCACACGATGGTTCACGAACAGCTCAAGACCTTTTTCAACGGTTTCCGCCGTGATGCCCACCCGATGGCCGTCATGTGCGGCGTAGTCGGCGCCCTGTCGGCGTTCTATCACGACTCGCTGGACATCAACAACCCGCAGCACCGCGAGATTTCTGC…
156	JFJ-0044	CHE	Snowfall	KY379254		Stopelli et al, 2017	GCCCCCGTCGAGCTGCCAATTCTGACGGGTACAGTGGGTCCGGACGTGATCGACGTACGCGGTCTCACCGCCACCGGCCGCTTCACATTTGACCCTGGCTTCATGTCCACGGCATCTTGCGAGTCGAAGATCACCTACATCGACGGTGATAACGGAATCCTGCTTCACCGCGGCTACCCGATCGAGCAACTGGCCGAGCAGTCCGATTACCTGGAAACCTGCTACCTGCTGCTCAATGGCGAATTGCCAACTGCCGAGCAGAAAGCCCAGTTCGTTGCCGTGGTCAAGAACCACACGATGGTTCACGAACAGCTCAAGACCTTTTTCAACGGCTTCCGCCGTGATGCCCACCCGATGGCCGTCATGTGCGGCGTAGTCGGCGCCCTGTCGGCGTTCTAT…
156	JFJ-0049	CHE	Snowfall	KY379259		Stopelli et al, 2017	GCCCCCGTCGAGCTGCCAATTCTGACGGGTACAGTGGGTCCGGACGTGATCGACGTACGCGGTCTCACCGCCACCGGCCGCTTCACATTTGACCCTGGCTTCATGTCCACGGCATCTTGCGAGTCGAAGATCACCTACATCGACGGTGATAACGGAATCCTGCTTCACCGCGGCTACCCGATCGAGCAACTGGCCGAGCAGTCCGATTACCTGGAAACCTGCTACCTGCTGCTCAATGGCGAATTGCCAACTGCCGAGCAGAAAGCCCAGTTCGTTGCCGTGGTCAAGAACCACACGATGGTTCACGAACAGCTCAAGACCTTTTTCAACGGCTTCCGCCGTGATGCCCACCCGATGGCCGTCATGTGCGGCGTAGTCGGCGCCCTGTCGGCGTTCTAT…
157	CCE0113	FRA	Freshwater	KJ877931		Berge et al., 2014	GCCCCCGTCGAGCTGCCAATTCTGACGGGTACAGTGGGTCCGGACGTGATCGACGTACGCGGTCTCACCGCCACCGGCCGCTTCACATTTGACCCTGGCTTCATGTCCACGGCATCTTGCGAGTCGAAGATCACCTACATCGATGGTGATAACGGAATTCTGCTTCACCGCGGCTACCCGATCGAACAACTGGCCGAGCAGTCCGATTATCTGGAAACCTGCTACCTGCTGCTCAATGGCGAATTGCCAACCGCCGAGCAGAAAGCCCAGTTCGTTGCCGTGGTCAAAAACCACACCATGGTTCACGAACAGCTCAAGACCTTTTTCAACGGTTTCCGCCGTGATGCCCACCCGATGGCCGTCATGTGCGGCGTAGTCGGCGCCCTGTCGGCGTTCTAT…
157	TA0019	FRA	Freshwater	KJ878497		Berge et al., 2014	GATCGACGTACGCGGTCTCACCGCCACCGGCCGCTTCACATTTGACCCTGGCTTCATGTCCACGGCATCTTGCGAGTCGAAGATCACCTACATCGATGGTGATAACGGAATTCTGCTTCACCGCGGCTACCCGATCGAACAACTGGCCGAGCAGTCCGATTATCTGGAAACCTGCTACCTGCTGCTCAATGGCGAATTGCCAACCGCCGAGCAGAAAGCCCAGTTCGTTGCCGTGGTCAAAAACCACACCATGGTTCACGAACAGCTCAAGACCTTTTTCAACGGTTTCCGCCGTGATGCCCACCCGATGGCCGTCATGTGCGGCGTAGTCGGCGCCCTGTCGGCGTTCTATCACGACTCGCTGGACATCAACAACCCGCAACACCGCGAGATTTCTGC…
158	CCE0888	FRA	Leaf_litter	KJ878023		Berge et al., 2014	TGATCGACGTACGCGGTCTCACCGCCACCGGCCGCTTCACATTTGACCCTGGCTTCATGTCCACGGCATCTTGCGAGTCGAAGATCACCTACATCGATGGTGATAACGGAATTCTGCTTCACCGCGGCTACCCGATCGAACAACTGGCCGAGCAGTCCGATTACCTGGAAACCTGCTACCTGCTGCTCAATGGCGAATTGCCAACCGCCGAGCAGAAAGCCCAGTTCGTTGCAGTGGTCAAAAACCACACGATGGTTCACGAACAGCTCAAGACCTTTTTCAACGGTTTCCGCCGTGATGCCCACCCGATGGCCGTCATGTGCGGCGTAGTCGGCGCCCTGTCGGCGTTCTATCACGACTCGCTGGACATCAACAACCCGCAGCACCGCGAGATTTCTG…
158	CCE0971	FRA	Freshwater	KJ878038		Berge et al., 2014	GCCCCCGTCGAGCTGCCAATTCTGACGGGTACAGTGGGTCCGGACGTGATCGACGTACGCGGTCTCACCGCCACCGGCCGCTTCACATTTGACCCTGGCTTCATGTCCACGGCATCTTGCGAGTCGAAGATCACCTACATCGATGGTGATAACGGAATTCTGCTTCACCGCGGCTACCCGATCGAACAACTGGCCGAGCAGTCCGATTACCTGGAAACCTGCTACCTGCTGCTCAATGGCGAATTGCCAACCGCCGAGCAGAAAGCCCAGTTCGTTGCAGTGGTCAAAAACCACACGATGGTTCACGAACAGCTCAAGACCTTTTTCAACGGTTTCCGCCGTGATGCCCACCCGATGGCCGTCATGTGCGGCGTAGTCGGCGCCCTGTCGGCGTTCTAT…
159	CC1464	USA	Plant	KJ877881		Berge et al., 2014	GAGGGCGCTGCCCCCGTCGAGCTGCCAATTCTGACGGGTACAGTGGGTCCGGACGTGATCGACGTACGCGGTCTCACCGCCACCGGCCGCTTCACATTTGACCCTGGCTTCATGTCCACGGCATCTTGCGAGTCGAAGATCACCTACATCGATGGTGATAACGGAATTCTGCTTCACCGCGGCTACCCGATCGAACAACTGGCCGAGCAGTCCGATTACCTGGAAACCTGCTACCTGCTGCTCAATGGCGAATTGCCAACCGCCGAGCAGAAAGCCCAGTTCGTTGCCGTGGTCAAAAACCACACGATGGTTCACGAACAGCTCAAGACCTTTTTCAACGGTTTCCGCCGTGATGCCCACCCGATGGCCGTCATGTGCGGCGTAGTCGGCGCCCTGTCG…
159	CC1466	USA	Plant	AVEM00000000		Berge et al., 2014	ATGGCTGAGAAAAAAGCGCAGTTGATCATCGAGGGTGCTGCCCCCGTCGAGCTGCCAATTCTGACGGGTACAGTGGGTCCGGACGTGATCGACGTACGCGGTCTCACCGCCACCGGCCGCTTCACATTTGACCCTGGCTTCATGTCCACGGCATCTTGCGAGTCGAAGATCACCTACATCGATGGTGATAACGGAATTCTGCTTCACCGCGGCTACCCGATCGAACAACTGGCCGAGCAGTCCGATTACCTGGAAACCTGCTACCTGCTGCTCAATGGCGAATTGCCAACCGCCGAGCAGAAAGCCCAGTTCGTTGCCGTGGTCAAAAACCACACGATGGTTCACGAACAGCTCAAGACCTTTTTCAACGGTTTCCGCCGTGATGCCCACCCGATGGCC…
159	CCE0066	FRA	Freshwater	KJ877919		Berge et al., 2014	GCCCCCGTCGAGCTGCCAATTCTGACGGGTACAGTGGGTCCGGACGTGATCGACGTACGCGGTCTCACCGCCACCGGCCGCTTCACATTTGACCCTGGCTTCATGTCCACGGCATCTTGCGAGTCGAAGATCACCTACATCGATGGTGATAACGGAATTCTGCTTCACCGCGGCTACCCGATCGAACAACTGGCCGAGCAGTCCGATTACCTGGAAACCTGCTACCTGCTGCTCAATGGCGAATTGCCAACCGCCGAGCAGAAAGCCCAGTTCGTTGCCGTGGTCAAAAACCACACGATGGTTCACGAACAGCTCAAGACCTTTTTCAACGGTTTCCGCCGTGATGCCCACCCGATGGCCGTCATGTGCGGCGTAGTCGGCGCCCTGTCGGCGTTCTAT…
159	CCE0242	FRA	Freshwater	KJ877966		Berge et al., 2014	GCCCCCGTCGAGCTGCCAATTCTGACGGGTACAGTGGGTCCGGACGTGATCGACGTACGCGGTCTCACCGCCACCGGCCGCTTCACATTTGACCCTGGCTTCATGTCCACGGCATCTTGCGAGTCGAAGATCACCTACATCGATGGTGATAACGGAATTCTGCTTCACCGCGGCTACCCGATCGAACAACTGGCCGAGCAGTCCGATTACCTGGAAACCTGCTACCTGCTGCTCAATGGCGAATTGCCAACCGCCGAGCAGAAAGCCCAGTTCGTTGCCGTGGTCAAAAACCACACGATGGTTCACGAACAGCTCAAGACCTTTTTCAACGGTTTCCGCCGTGATGCCCACCCGATGGCCGTCATGTGCGGCGTAGTCGGCGCCCTGTCGGCGTTCTAT…
159	CCE0645	FRA	Leaf_litter	KJ877995		Berge et al., 2014	GAGGGCGCTGCCCCCGTCGAGCTGCCAATTCTGACGGGTACAGTGGGTCCGGACGTGATCGACGTACGCGGTCTCACCGCCACCGGCCGCTTCACATTTGACCCTGGCTTCATGTCCACGGCATCTTGCGAGTCGAAGATCACCTACATCGATGGTGATAACGGAATTCTGCTTCACCGCGGCTACCCGATCGAACAACTGGCCGAGCAGTCCGATTACCTGGAAACCTGCTACCTGCTGCTCAATGGCGAATTGCCAACCGCCGAGCAGAAAGCCCAGTTCGTTGCCGTGGTCAAAAACCACACGATGGTTCACGAACAGCTCAAGACCTTTTTCAACGGTTTCCGCCGTGATGCCCACCCGATGGCCGTCATGTGCGGCGTAGTCGGCGCCCTGTCG…
159	CCE0887	FRA	Leaf_litter	KJ878022		Berge et al., 2014	TGATCGACGTACGCGGTCTCACCGCCACCGGCCGCTTCACATTTGACCCTGGCTTCATGTCCACGGCATCTTGCGAGTCGAAGATCACCTACATCGATGGTGATAACGGAATTCTGCTTCACCGCGGCTACCCGATCGAACAACTGGCCGAGCAGTCCGATTACCTGGAAACCTGCTACCTGCTGCTCAATGGCGAATTGCCAACCGCCGAGCAGAAAGCCCAGTTCGTTGCCGTGGTCAAAAACCACACGATGGTTCACGAACAGCTCAAGACCTTTTTCAACGGTTTCCGCCGTGATGCCCACCCGATGGCCGTCATGTGCGGCGTAGTCGGCGCCCTGTCGGCGTTCTATCACGACTCGCTGGACATCAACAACCCGCAGCACCGCGAGATTTCTG…
159	CCV0522	FRA	Leaf_litter	KJ878084		Berge et al., 2014	GTCTCACCGCCACCGGCCGCTTCACATTTGACCCTGGCTTCATGTCCACGGCATCTTGCGAGTCGAAGATCACCTACATCGATGGTGATAACGGAATTCTGCTTCACCGCGGCTACCCGATCGAACAACTGGCCGAGCAGTCCGATTACCTGGAAACCTGCTACCTGCTGCTCAATGGCGAATTGCCAACCGCCGAGCAGAAAGCCCAGTTCGTTGCCGTGGTCAAAAACCACACGATGGTTCACGAACAGCTCAAGACCTTTTTCAACGGTTTCCGCCGTGATGCCCACCCGATGGCCGTCATGTGCGGCGTAGTCGGCGCCCTGTCGGCGTTCTATCACGACTCGCTGGACATCAACAACCCGCAGCACCGCGAGATTTCTGCCGTGCGCCTGGTCG…
159	CLA0209	FRA	Snowpack	KJ878120		Berge et al., 2014	GAGGGCGCTGCCCCCGTCGAGCTGCCAATTCTGACGGGTACAGTGGGTCCGGACGTGATCGACGTACGCGGTCTCACCGCCACCGGCCGCTTCACATTTGACCCTGGCTTCATGTCCACGGCATCTTGCGAGTCGAAGATCACCTACATCGATGGTGATAACGGAATTCTGCTTCACCGCGGCTACCCGATCGAACAACTGGCCGAGCAGTCCGATTACCTGGAAACCTGCTACCTGCTGCTCAATGGCGAATTGCCAACCGCCGAGCAGAAAGCCCAGTTCGTTGCCGTGGTCAAAAACCACACGATGGTTCACGAACAGCTCAAGACCTTTTTCAACGGTTTCCGCCGTGATGCCCACCCGATGGCCGTCATGTGCGGCGTAGTCGGCGCCCTGTCG…
159	CLA0214	FRA	Snowpack	KJ878122		Berge et al., 2014	TACGCGGTCTCACCGCCACCGGCCGCTTCACATTTGACCCTGGCTTCATGTCCACGGCATCTTGCGAGTCGAAGATCACCTACATCGATGGTGATAACGGAATTCTGCTTCACCGCGGCTACCCGATCGAACAACTGGCCGAGCAGTCCGATTACCTGGAAACCTGCTACCTGCTGCTCAATGGCGAATTGCCAACCGCCGAGCAGAAAGCCCAGTTCGTTGCCGTGGTCAAAAACCACACGATGGTTCACGAACAGCTCAAGACCTTTTTCAACGGTTTCCGCCGTGATGCCCACCCGATGGCCGTCATGTGCGGCGTAGTCGGCGCCCTGTCGGCGTTCTATCACGACTCGCTGGACATCAACAACCCGCAGCACCGCGAGATTTCTGCCGTGCGCC…
159	CLA0251	FRA	Snowpack	KJ878127		Berge et al., 2014	GAGGGCGCTGCCCCCGTCGAGCTGCCAATTCTGACGGGTACAGTGGGTCCGGACGTGATCGACGTACGCGGTCTCACCGCCACCGGCCGCTTCACATTTGACCCTGGCTTCATGTCCACGGCATCTTGCGAGTCGAAGATCACCTACATCGATGGTGATAACGGAATTCTGCTTCACCGCGGCTACCCGATCGAACAACTGGCCGAGCAGTCCGATTACCTGGAAACCTGCTACCTGCTGCTCAATGGCGAATTGCCAACCGCCGAGCAGAAAGCCCAGTTCGTTGCCGTGGTCAAAAACCACACGATGGTTCACGAACAGCTCAAGACCTTTTTCAACGGTTTCCGCCGTGATGCCCACCCGATGGCCGTCATGTGCGGCGTAGTCGGCGCCCTGTCG…
159	CSZ0906	FRA	Snowpack	KJ878292		Berge et al., 2014	GAGGGCGCTGCCCCCGTCGAGCTGCCAATTCTGACGGGTACAGTGGGTCCGGACGTGATCGACGTACGCGGTCTCACCGCCACCGGCCGCTTCACATTTGACCCTGGCTTCATGTCCACGGCATCTTGCGAGTCGAAGATCACCTACATCGATGGTGATAACGGAATTCTGCTTCACCGCGGCTACCCGATCGAACAACTGGCCGAGCAGTCCGATTACCTGGAAACCTGCTACCTGCTGCTCAATGGCGAATTGCCAACCGCCGAGCAGAAAGCCCAGTTCGTTGCCGTGGTCAAAAACCACACGATGGTTCACGAACAGCTCAAGACCTTTTTCAACGGTTTCCGCCGTGATGCCCACCCGATGGCCGTCATGTGCGGCGTAGTCGGCGCCCTGTCG…
159	LAB0067	FRA	Biofilm	KJ878385		Berge et al., 2014	GAGGGCGCTGCCCCCGTCGAGCTGCCAATTCTGACGGGTACAGTGGGTCCGGACGTGATCGACGTACGCGGTCTCACCGCCACCGGCCGCTTCACATTTGACCCTGGCTTCATGTCCACGGCATCTTGCGAGTCGAAGATCACCTACATCGATGGTGATAACGGAATTCTGCTTCACCGCGGCTACCCGATCGAACAACTGGCCGAGCAGTCCGATTACCTGGAAACCTGCTACCTGCTGCTCAATGGCGAATTGCCAACCGCCGAGCAGAAAGCCCAGTTCGTTGCCGTGGTCAAAAACCACACGATGGTTCACGAACAGCTCAAGACCTTTTTCAACGGTTTCCGCCGTGATGCCCACCCGATGGCCGTCATGTGCGGCGTAGTCGGCGCCCTGTCG…
160	AI0029	NZL	Freshwater	KJ877813		Berge et al., 2014	CTGCATTCTGACGGGTACAGTGGGTCCGGACGTGATCGACGTACGCGGTCTCACCGCCACCGGCCGCTTCACATTTGACCCTGGCTTCATGTCCACGGCATCTTGCGAGTCGAAGATCACCTACATCGATGGTGATAACGGAATTCTGCTTCACCGCGGCTACCCGATCGAACAACTGGCCGAGCAGTCCGACTATCTGGAAACCTGCTACCTGCTGCTCAATGGCGAATTGCCAACCGCCGAGCAGAAAGCCCAGTTCGTTGCCGTGGTCAAAAACCACACGATGGTTCACGAACAGCTCAAGACCTTTTTCAACGGTTTCCGCCGTGATGCCCACCCGATGGCCGTCATGTGCGGCGTAGTCGGCGCCCTGTCGGCGTTCTATCACGACTCTCTGGA…
160	CC1490	FRA	Snowfall	KJ877889		Berge et al., 2014	GAGGGCGCTGCCCCCGTCGAGCTGCCAATTCTGACGGGTACAGTGGGTCCGGACGTGATCGACGTACGCGGTCTCACCGCCACCGGCCGCTTCACATTTGACCCTGGCTTCATGTCCACGGCATCTTGCGAGTCGAAGATCACCTACATCGATGGTGATAACGGAATTCTGCTTCACCGCGGCTACCCGATCGAACAACTGGCCGAGCAGTCCGACTATCTGGAAACCTGCTACCTGCTGCTCAATGGCGAATTGCCAACCGCCGAGCAGAAAGCCCAGTTCGTTGCCGTGGTCAAAAACCACACGATGGTTCACGAACAGCTCAAGACCTTTTTCAACGGTTTCCGCCGTGATGCCCACCCGATGGCCGTCATGTGCGGCGTAGTCGGCGCCCTGTCG…
160	CCE0637	FRA	Leaf_litter	KJ877991		Berge et al., 2014	GAGGGCGCTGCCCCCGTCGAGCTGCCAATTCTGACGGGTACAGTGGGTCCGGACGTGATCGACGTACGCGGTCTCACCGCCACCGGCCGCTTCACATTTGACCCTGGCTTCATGTCCACGGCATCTTGCGAGTCGAAGATCACCTACATCGATGGTGATAACGGAATTCTGCTTCACCGCGGCTACCCGATCGAACAACTGGCCGAGCAGTCCGACTATCTGGAAACCTGCTACCTGCTGCTCAATGGCGAATTGCCAACCGCCGAGCAGAAAGCCCAGTTCGTTGCCGTGGTCAAAAACCACACGATGGTTCACGAACAGCTCAAGACCTTTTTCAACGGTTTCCGCCGTGATGCCCACCCGATGGCCGTCATGTGCGGCGTAGTCGGCGCCCTGTCG…
160	CCE0656	FRA	Leaf_litter	KJ877999		Berge et al., 2014	GTCTCACCGCCACCGGCCGCTTCACATTTGACCCTGGCTTCATGTCCACGGCATCTTGCGAGTCGAAGATCACCTACATCGATGGTGATAACGGAATTCTGCTTCACCGCGGCTACCCGATCGAACAACTGGCCGAGCAGTCCGACTATCTGGAAACCTGCTACCTGCTGCTCAATGGCGAATTGCCAACCGCCGAGCAGAAAGCCCAGTTCGTTGCCGTGGTCAAAAACCACACGATGGTTCACGAACAGCTCAAGACCTTTTTCAACGGTTTCCGCCGTGATGCCCACCCGATGGCCGTCATGTGCGGCGTAGTCGGCGCCCTGTCGGCGTTCTATCACGACTCTCTGGACATCAACAACCCGCAGCACCGCGAGATTTCTGCCGTGCGCCTGGTCG…
160	CCE0910	FRA	Leaf_litter	KJ878028		Berge et al., 2014	GTCTCACCGCCACCGGCCGCTTCACATTTGACCCTGGCTTCATGTCCACGGCATCTTGCGAGTCGAAGATCACCTACATCGATGGTGATAACGGAATTCTGCTTCACCGCGGCTACCCGATCGAACAACTGGCCGAGCAGTCCGACTATCTGGAAACCTGCTACCTGCTGCTCAATGGCGAATTGCCAACCGCCGAGCAGAAAGCCCAGTTCGTTGCCGTGGTCAAAAACCACACGATGGTTCACGAACAGCTCAAGACCTTTTTCAACGGTTTCCGCCGTGATGCCCACCCGATGGCCGTCATGTGCGGCGTAGTCGGCGCCCTGTCGGCGTTCTATCACGACTCTCTGGACATCAACAACCCGCAGCACCGCGAGATTTCTGCCGTGCGCCTGGTCG…
160	CCV0080	FRA	Freshwater	KJ878047		Berge et al., 2014	GCCCCCGTCGAGCTGCCAATTCTGACGGGTACAGTGGGTCCGGACGTGATCGACGTACGCGGTCTCACCGCCACCGGCCGCTTCACATTTGACCCTGGCTTCATGTCCACGGCATCTTGCGAGTCGAAGATCACCTACATCGATGGTGATAACGGAATTCTGCTTCACCGCGGCTACCCGATCGAACAACTGGCCGAGCAGTCCGACTATCTGGAAACCTGCTACCTGCTGCTCAATGGCGAATTGCCAACCGCCGAGCAGAAAGCCCAGTTCGTTGCCGTGGTCAAAAACCACACGATGGTTCACGAACAGCTCAAGACCTTTTTCAACGGTTTCCGCCGTGATGCCCACCCGATGGCCGTCATGTGCGGCGTAGTCGGCGCCCTGTCGGCGTTCTAT…
160	CCV0128	FRA	Freshwater	KJ878057		Berge et al., 2014	GCCCCCGTCGAGCTGCCAATTCTGACGGGTACAGTGGGTCCGGACGTGATCGACGTACGCGGTCTCACCGCCACCGGCCGCTTCACATTTGACCCTGGCTTCATGTCCACGGCATCTTGCGAGTCGAAGATCACCTACATCGATGGTGATAACGGAATTCTGCTTCACCGCGGCTACCCGATCGAACAACTGGCCGAGCAGTCCGACTATCTGGAAACCTGCTACCTGCTGCTCAATGGCGAATTGCCAACCGCCGAGCAGAAAGCCCAGTTCGTTGCCGTGGTCAAAAACCACACGATGGTTCACGAACAGCTCAAGACCTTTTTCAACGGTTTCCGCCGTGATGCCCACCCGATGGCCGTCATGTGCGGCGTAGTCGGCGCCCTGTCGGCGTTCTAT…
160	CEB0005	FRA	Biofilm	KJ878094		Berge et al., 2014	GAGGGCGCTGCCCCCGTCGAGCTGCCAATTCTGACGGGTACAGTGGGTCCGGACGTGATCGACGTACGCGGTCTCACCGCCACCGGCCGCTTCACATTTGACCCTGGCTTCATGTCCACGGCATCTTGCGAGTCGAAGATCACCTACATCGATGGTGATAACGGAATTCTGCTTCACCGCGGCTACCCGATCGAACAACTGGCCGAGCAGTCCGACTATCTGGAAACCTGCTACCTGCTGCTCAATGGCGAATTGCCAACCGCCGAGCAGAAAGCCCAGTTCGTTGCCGTGGTCAAAAACCACACGATGGTTCACGAACAGCTCAAGACCTTTTTCAACGGTTTCCGCCGTGATGCCCACCCGATGGCCGTCATGTGCGGCGTAGTCGGCGCCCTGTCG…
160	CLA0192	FRA	Snowpack	KJ878115		Berge et al., 2014	GACGTACGCGGTCTCACCGCCACCGGCCGCTTCACATTTGACCCTGGCTTCATGTCCACGGCATCTTGCGAGTCGAAGATCACCTACATCGATGGTGATAACGGAATTCTGCTTCACCGCGGCTACCCGATCGAACAACTGGCCGAGCAGTCCGACTATCTGGAAACCTGCTACCTGCTGCTCAATGGCGAATTGCCAACCGCCGAGCAGAAAGCCCAGTTCGTTGCCGTGGTCAAAAACCACACGATGGTTCACGAACAGCTCAAGACCTTTTTCAACGGTTTCCGCCGTGATGCCCACCCGATGGCCGTCATGTGCGGCGTAGTCGGCGCCCTGTCGGCGTTCTATCACGACTCTCTGGACATCAACAACCCGCAGCACCGCGAGATTTCTGCCGTG…
160	CLA0207	FRA	Snowpack	KJ878119		Berge et al., 2014	TGATCGACGTACGCGGTCTCACCGCCACCGGCCGCTTCACATTTGACCCTGGCTTCATGTCCACGGCATCTTGCGAGTCGAAGATCACCTACATCGATGGTGATAACGGAATTCTGCTTCACCGCGGCTACCCGATCGAACAACTGGCCGAGCAGTCCGACTATCTGGAAACCTGCTACCTGCTGCTCAATGGCGAATTGCCAACCGCCGAGCAGAAAGCCCAGTTCGTTGCCGTGGTCAAAAACCACACGATGGTTCACGAACAGCTCAAGACCTTTTTCAACGGTTTCCGCCGTGATGCCCACCCGATGGCCGTCATGTGCGGCGTAGTCGGCGCCCTGTCGGCGTTCTATCACGACTCTCTGGACATCAACAACCCGCAGCACCGCGAGATTTCTG…
160	CLA0219	FRA	Snowpack	KJ878124		Berge et al., 2014	TGATCGACGTACGCGGTCTCACCGCCACCGGCCGCTTCACATTTGACCCTGGCTTCATGTCCACGGCATCTTGCGAGTCGAAGATCACCTACATCGATGGTGATAACGGAATTCTGCTTCACCGCGGCTACCCGATCGAACAACTGGCCGAGCAGTCCGACTATCTGGAAACCTGCTACCTGCTGCTCAATGGCGAATTGCCAACCGCCGAGCAGAAAGCCCAGTTCGTTGCCGTGGTCAAAAACCACACGATGGTTCACGAACAGCTCAAGACCTTTTTCAACGGTTTCCGCCGTGATGCCCACCCGATGGCCGTCATGTGCGGCGTAGTCGGCGCCCTGTCGGCGTTCTATCACGACTCTCTGGACATCAACAACCCGCAGCACCGCGAGATTTCTG…
160	CLA0252	FRA	Snowpack	KJ878128		Berge et al., 2014	GAGGGCGCTGCCCCCGTCGAGCTGCCAATTCTGACGGGTACAGTGGGTCCGGACGTGATCGACGTACGCGGTCTCACCGCCACCGGCCGCTTCACATTTGACCCTGGCTTCATGTCCACGGCATCTTGCGAGTCGAAGATCACCTACATCGATGGTGATAACGGAATTCTGCTTCACCGCGGCTACCCGATCGAACAACTGGCCGAGCAGTCCGACTATCTGGAAACCTGCTACCTGCTGCTCAATGGCGAATTGCCAACCGCCGAGCAGAAAGCCCAGTTCGTTGCCGTGGTCAAAAACCACACGATGGTTCACGAACAGCTCAAGACCTTTTTCAACGGTTTCCGCCGTGATGCCCACCCGATGGCCGTCATGTGCGGCGTAGTCGGCGCCCTGTCG…
160	CLA0316	FRA	Leaf_litter	KJ878134		Berge et al., 2014	GAGGGCGCTGCCCCCGTCGAGCTGCCAATTCTGACGGGTACAGTGGGTCCGGACGTGATCGACGTACGCGGTCTCACCGCCACCGGCCGCTTCACATTTGACCCTGGCTTCATGTCCACGGCATCTTGCGAGTCGAAGATCACCTACATCGATGGTGATAACGGAATTCTGCTTCACCGCGGCTACCCGATCGAACAACTGGCCGAGCAGTCCGACTATCTGGAAACCTGCTACCTGCTGCTCAATGGCGAATTGCCAACCGCCGAGCAGAAAGCCCAGTTCGTTGCCGTGGTCAAAAACCACACGATGGTTCACGAACAGCTCAAGACCTTTTTCAACGGTTTCCGCCGTGATGCCCACCCGATGGCCGTCATGTGCGGCGTAGTCGGCGCCCTGTCG…
160	CLA0499	FRA	Rain	KJ878138		Berge et al., 2014	AGGGCGCTGCCCCCGTCGAGCTGCCAATTCTGACGGGTACAGTGGGTCCGGACGTGATCGACGTACGCGGTCTCACCGCCACCGGCCGCTTCACATTTGACCCTGGCTTCATGTCCACGGCATCTTGCGAGTCGAAGATCACCTACATCGATGGTGATAACGGAATTCTGCTTCACCGCGGCTACCCGATCGAACAACTGGCCGAGCAGTCCGACTATCTGGAAACCTGCTACCTGCTGCTCAATGGCGAATTGCCAACCGCCGAGCAGAAAGCCCAGTTCGTTGCCGTGGTCAAAAACCACACGATGGTTCACGAACAGCTCAAGACCTTTTTCAACGGTTTCCGCCGTGATGCCCACCCGATGGCCGTCATGTGCGGCGTAGTCGGCGCCCTGTCGG…
160	CSZ0346	FRA	Freshwater	KJ878259		Berge et al., 2014	GCCCCCGTCGAGCTGCCAATTCTGACGGGTACAGTGGGTCCGGACGTGATCGACGTACGCGGTCTCACCGCCACCGGCCGCTTCACATTTGACCCTGGCTTCATGTCCACGGCATCTTGCGAGTCGAAGATCACCTACATCGATGGTGATAACGGAATTCTGCTTCACCGCGGCTACCCGATCGAACAACTGGCCGAGCAGTCCGACTATCTGGAAACCTGCTACCTGCTGCTCAATGGCGAATTGCCAACCGCCGAGCAGAAAGCCCAGTTCGTTGCCGTGGTCAAAAACCACACGATGGTTCACGAACAGCTCAAGACCTTTTTCAACGGTTTCCGCCGTGATGCCCACCCGATGGCCGTCATGTGCGGCGTAGTCGGCGCCCTGTCGGCGTTCTAT…
160	CSZ0709	FRA	Snowpack	KJ878269		Berge et al., 2014	GACGTACGCGGTCTCACCGCCACCGGCCGCTTCACATTTGACCCTGGCTTCATGTCCACGGCATCTTGCGAGTCGAAGATCACCTACATCGATGGTGATAACGGAATTCTGCTTCACCGCGGCTACCCGATCGAACAACTGGCCGAGCAGTCCGACTATCTGGAAACCTGCTACCTGCTGCTCAATGGCGAATTGCCAACCGCCGAGCAGAAAGCCCAGTTCGTTGCCGTGGTCAAAAACCACACGATGGTTCACGAACAGCTCAAGACCTTTTTCAACGGTTTCCGCCGTGATGCCCACCCGATGGCCGTCATGTGCGGCGTAGTCGGCGCCCTGTCGGCGTTCTATCACGACTCTCTGGACATCAACAACCCGCAGCACCGCGAGATTTCTGCCGTG…
160	CSZ0808	FRA	Leaf_litter	KJ878279		Berge et al., 2014	GACGTACGCGGTCTCACCGCCACCGGCCGCTTCACATTTGACCCTGGCTTCATGTCCACGGCATCTTGCGAGTCGAAGATCACCTACATCGATGGTGATAACGGAATTCTGCTTCACCGCGGCTACCCGATCGAACAACTGGCCGAGCAGTCCGACTATCTGGAAACCTGCTACCTGCTGCTCAATGGCGAATTGCCAACCGCCGAGCAGAAAGCCCAGTTCGTTGCCGTGGTCAAAAACCACACGATGGTTCACGAACAGCTCAAGACCTTTTTCAACGGTTTCCGCCGTGATGCCCACCCGATGGCCGTCATGTGCGGCGTAGTCGGCGCCCTGTCGGCGTTCTATCACGACTCTCTGGACATCAACAACCCGCAGCACCGCGAGATTTCTGCCGTG…
160	CSZ0843	FRA	Leaf_litter	KJ878281		Berge et al., 2014	GTGATCGACGTACGCGGTCTCACCGCCACCGGCCGCTTCACATTTGACCCTGGCTTCATGTCCACGGCATCTTGCGAGTCGAAGATCACCTACATCGATGGTGATAACGGAATTCTGCTTCACCGCGGCTACCCGATCGAACAACTGGCCGAGCAGTCCGACTATCTGGAAACCTGCTACCTGCTGCTCAATGGCGAATTGCCAACCGCCGAGCAGAAAGCCCAGTTCGTTGCCGTGGTCAAAAACCACACGATGGTTCACGAACAGCTCAAGACCTTTTTCAACGGTTTCCGCCGTGATGCCCACCCGATGGCCGTCATGTGCGGCGTAGTCGGCGCCCTGTCGGCGTTCTATCACGACTCTCTGGACATCAACAACCCGCAGCACCGCGAGATTTCT…
160	CSZ0845	FRA	Leaf_litter	KJ878282		Berge et al., 2014	TGATCGACGTACGCGGTCTCACCGCCACCGGCCGCTTCACATTTGACCCTGGCTTCATGTCCACGGCATCTTGCGAGTCGAAGATCACCTACATCGATGGTGATAACGGAATTCTGCTTCACCGCGGCTACCCGATCGAACAACTGGCCGAGCAGTCCGACTATCTGGAAACCTGCTACCTGCTGCTCAATGGCGAATTGCCAACCGCCGAGCAGAAAGCCCAGTTCGTTGCCGTGGTCAAAAACCACACGATGGTTCACGAACAGCTCAAGACCTTTTTCAACGGTTTCCGCCGTGATGCCCACCCGATGGCCGTCATGTGCGGCGTAGTCGGCGCCCTGTCGGCGTTCTATCACGACTCTCTGGACATCAACAACCCGCAGCACCGCGAGATTTCTG…
160	CSZ0865	FRA	Leaf_litter	KJ878287		Berge et al., 2014	GAGGGCGCTGCCCCCGTCGAGCTGCCAATTCTGACGGGTACAGTGGGTCCGGACGTGATCGACGTACGCGGTCTCACCGCCACCGGCCGCTTCACATTTGACCCTGGCTTCATGTCCACGGCATCTTGCGAGTCGAAGATCACCTACATCGATGGTGATAACGGAATTCTGCTTCACCGCGGCTACCCGATCGAACAACTGGCCGAGCAGTCCGACTATCTGGAAACCTGCTACCTGCTGCTCAATGGCGAATTGCCAACCGCCGAGCAGAAAGCCCAGTTCGTTGCCGTGGTCAAAAACCACACGATGGTTCACGAACAGCTCAAGACCTTTTTCAACGGTTTCCGCCGTGATGCCCACCCGATGGCCGTCATGTGCGGCGTAGTCGGCGCCCTGTCG…
160	CVB0067	FRA	Biofilm	KJ878313		Berge et al., 2014	GAGGGCGCTGCCCCCGTCGAGCTGCCAATTCTGACGGGTACAGTGGGTCCGGACGTGATCGACGTACGCGGTCTCACCGCCACCGGCCGCTTCACATTTGACCCTGGCTTCATGTCCACGGCATCTTGCGAGTCGAAGATCACCTACATCGATGGTGATAACGGAATTCTGCTTCACCGCGGCTACCCGATCGAACAACTGGCCGAGCAGTCCGACTATCTGGAAACCTGCTACCTGCTGCTCAATGGCGAATTGCCAACCGCCGAGCAGAAAGCCCAGTTCGTTGCCGTGGTCAAAAACCACACGATGGTTCACGAACAGCTCAAGACCTTTTTCAACGGTTTCCGCCGTGATGCCCACCCGATGGCCGTCATGTGCGGCGTAGTCGGCGCCCTGTCG…
160	CVB0070	FRA	Biofilm	KJ878314		Berge et al., 2014	CGAGGGCGCTGCCCCCGTCGAGCTGCCAATTCTGACGGGTACAGTGGGTCCGGACGTGATCGACGTACGCGGTCTCACCGCCACCGGCCGCTTCACATTTGACCCTGGCTTCATGTCCACGGCATCTTGCGAGTCGAAGATCACCTACATCGATGGTGATAACGGAATTCTGCTTCACCGCGGCTACCCGATCGAACAACTGGCCGAGCAGTCCGACTATCTGGAAACCTGCTACCTGCTGCTCAATGGCGAATTGCCAACCGCCGAGCAGAAAGCCCAGTTCGTTGCCGTGGTCAAAAACCACACGATGGTTCACGAACAGCTCAAGACCTTTTTCAACGGTTTCCGCCGTGATGCCCACCCGATGGCCGTCATGTGCGGCGTAGTCGGCGCCCTGTC…
160	CVB0091	FRA	Biofilm	KJ878316		Berge et al., 2014	AGGGCGCTGCCCCCGTCGAGCTGCCAATTCTGACGGGTACAGTGGGTCCGGACGTGATCGACGTACGCGGTCTCACCGCCACCGGCCGCTTCACATTTGACCCTGGCTTCATGTCCACGGCATCTTGCGAGTCGAAGATCACCTACATCGATGGTGATAACGGAATTCTGCTTCACCGCGGCTACCCGATCGAACAACTGGCCGAGCAGTCCGACTATCTGGAAACCTGCTACCTGCTGCTCAATGGCGAATTGCCAACCGCCGAGCAGAAAGCCCAGTTCGTTGCCGTGGTCAAAAACCACACGATGGTTCACGAACAGCTCAAGACCTTTTTCAACGGTTTCCGCCGTGATGCCCACCCGATGGCCGTCATGTGCGGCGTAGTCGGCGCCCTGTCGG…
160	CVB0095	FRA	Biofilm	KJ878318		Berge et al., 2014	GGGCGCTGCCCCCGTCGAGCTGCCAATTCTGACGGGTACAGTGGGTCCGGACGTGATCGACGTACGCGGTCTCACCGCCACCGGCCGCTTCACATTTGACCCTGGCTTCATGTCCACGGCATCTTGCGAGTCGAAGATCACCTACATCGATGGTGATAACGGAATTCTGCTTCACCGCGGCTACCCGATCGAACAACTGGCCGAGCAGTCCGACTATCTGGAAACCTGCTACCTGCTGCTCAATGGCGAATTGCCAACCGCCGAGCAGAAAGCCCAGTTCGTTGCCGTGGTCAAAAACCACACGATGGTTCACGAACAGCTCAAGACCTTTTTCAACGGTTTCCGCCGTGATGCCCACCCGATGGCCGTCATGTGCGGCGTAGTCGGCGCCCTGTCGGC…
160	TA0003	FRA	Freshwater	KJ878489		Berge et al., 2014	CGACGTACGCGGTCTCACCGCCACCGGCCGCTTCACATTTGACCCTGGCTTCATGTCCACGGCATCTTGCGAGTCGAAGATCACCTACATCGATGGTGATAACGGAATTCTGCTTCACCGCGGCTACCCGATCGAACAACTGGCCGAGCAGTCCGACTATCTGGAAACCTGCTACCTGCTGCTCAATGGCGAATTGCCAACCGCCGAGCAGAAAGCCCAGTTCGTTGCCGTGGTCAAAAACCACACGATGGTTCACGAACAGCTCAAGACCTTTTTCAACGGTTTCCGCCGTGATGCCCACCCGATGGCCGTCATGTGCGGCGTAGTCGGCGCCCTGTCGGCGTTCTATCACGACTCTCTGGACATCAACAACCCGCAGCACCGCGAGATTTCTGCCGT…
160	TA0005	FRA	Freshwater	KJ878490		Berge et al., 2014	ATCGACGTACGCGGTCTCACCGCCACCGGCCGCTTCACATTTGACCCTGGCTTCATGTCCACGGCATCTTGCGAGTCGAAGATCACCTACATCGATGGTGATAACGGAATTCTGCTTCACCGCGGCTACCCGATCGAACAACTGGCCGAGCAGTCCGACTATCTGGAAACCTGCTACCTGCTGCTCAATGGCGAATTGCCAACCGCCGAGCAGAAAGCCCAGTTCGTTGCCGTGGTCAAAAACCACACGATGGTTCACGAACAGCTCAAGACCTTTTTCAACGGTTTCCGCCGTGATGCCCACCCGATGGCCGTCATGTGCGGCGTAGTCGGCGCCCTGTCGGCGTTCTATCACGACTCTCTGGACATCAACAACCCGCAGCACCGCGAGATTTCTGCC…
160	TA0008	FRA	Freshwater	KJ878492		Berge et al., 2014	GTGATCGACGTACGCGGTCTCACCGCCACCGGCCGCTTCACATTTGACCCTGGCTTCATGTCCACGGCATCTTGCGAGTCGAAGATCACCTACATCGATGGTGATAACGGAATTCTGCTTCACCGCGGCTACCCGATCGAACAACTGGCCGAGCAGTCCGACTATCTGGAAACCTGCTACCTGCTGCTCAATGGCGAATTGCCAACCGCCGAGCAGAAAGCCCAGTTCGTTGCCGTGGTCAAAAACCACACGATGGTTCACGAACAGCTCAAGACCTTTTTCAACGGTTTCCGCCGTGATGCCCACCCGATGGCCGTCATGTGCGGCGTAGTCGGCGCCCTGTCGGCGTTCTATCACGACTCTCTGGACATCAACAACCCGCAGCACCGCGAGATTTCT…
160	TA0009	FRA	Freshwater	KJ878493		Berge et al., 2014	GATCGACGTACGCGGTCTCACCGCCACCGGCCGCTTCACATTTGACCCTGGCTTCATGTCCACGGCATCTTGCGAGTCGAAGATCACCTACATCGATGGTGATAACGGAATTCTGCTTCACCGCGGCTACCCGATCGAACAACTGGCCGAGCAGTCCGACTATCTGGAAACCTGCTACCTGCTGCTCAATGGCGAATTGCCAACCGCCGAGCAGAAAGCCCAGTTCGTTGCCGTGGTCAAAAACCACACGATGGTTCACGAACAGCTCAAGACCTTTTTCAACGGTTTCCGCCGTGATGCCCACCCGATGGCCGTCATGTGCGGCGTAGTCGGCGCCCTGTCGGCGTTCTATCACGACTCTCTGGACATCAACAACCCGCAGCACCGCGAGATTTCTGC…
160	TA0022	FRA	Freshwater	KJ878499		Berge et al., 2014	GATCGACGTACGCGGTCTCACCGCCACCGGCCGCTTCACATTTGACCCTGGCTTCATGTCCACGGCATCTTGCGAGTCGAAGATCACCTACATCGATGGTGATAACGGAATTCTGCTTCACCGCGGCTACCCGATCGAACAACTGGCCGAGCAGTCCGACTATCTGGAAACCTGCTACCTGCTGCTCAATGGCGAATTGCCAACCGCCGAGCAGAAAGCCCAGTTCGTTGCCGTGGTCAAAAACCACACGATGGTTCACGAACAGCTCAAGACCTTTTTCAACGGTTTCCGCCGTGATGCCCACCCGATGGCCGTCATGTGCGGCGTAGTCGGCGCCCTGTCGGCGTTCTATCACGACTCTCTGGACATCAACAACCCGCAGCACCGCGAGATTTCTGC…
160	36B1	FRA	Cloud	NA		Joly et al, 2013	GACGTACGCGGCCTGACCGCCACCGGCCGCTTCACATTTGACCCTGGCTTCATGTCCACGGCCTCTTGCGATTCGAAGATCACCTACATCGATGGTGATAATGGCATTCTGTTGCACCGCGGCTACCCGATCGAACAACTGGCCGAGCAGTCCGACTACCTGGAAACCTGCTACCTGCTGCTCAACGGCGAACTGCCCACCGCCGAGCAGAAAGCCCAGTTCGTGGCCGTGGTCAAGAACCACACGATGGTTCACGAACAGCTCAAGACCTTTTTCAACGGTTTCCGCCGTGACGCCCACCCGATGGCCGTCATGTGTGGTGTAGTCGGCGCCCTGTCAGCGTTCTACCACGACTCTCTGGACATCAATAACCCGCAGCATCGCGAGATTTCCGCGATC…
161	CLA0284	FRA	Leaf_litter	KJ878132		Berge et al., 2014	GAGGGCGCTGCCCCCGTCGAGCTGCCAATTCTGACGGGTACAGTGGGTCCGGACGTGATCGACGTACGCGGTCTCACCGCCACCGGCCGCTTCACATTTGACCCTGGCTTCATGTCCACGGCATCTTGCGAGTCGAAGATCACCTACATCGATGGTGATAATGGAATTCTGCTTCACCGCGGCTACCCGATCGAACAACTGGCCGAGCAGTCCGATTATCTGGAAACCTGCTACCTGCTGCTCAATGGCGAATTGCCAACCGCCGAGCAGAAAGCCCAGTTCGTTGCCGTGGTCAAAAACCACACGATGGTTCACGAACAGCTCAAGACCTTTTTCAACGGTTTCCGCCGTGATGCCCACCCGATGGCCGTCATGTGCGGCGTAGTCGGCGCCCTGTCG…
161	CSZ0904	FRA	Snowpack	KJ878290		Berge et al., 2014	GATCGACGTACGCGGTCTCACCGCCACCGGCCGCTTCACATTTGACCCTGGCTTCATGTCCACGGCATCTTGCGAGTCGAAGATCACCTACATCGATGGTGATAATGGAATTCTGCTTCACCGCGGCTACCCGATCGAACAACTGGCCGAGCAGTCCGATTATCTGGAAACCTGCTACCTGCTGCTCAATGGCGAATTGCCAACCGCCGAGCAGAAAGCCCAGTTCGTTGCCGTGGTCAAAAACCACACGATGGTTCACGAACAGCTCAAGACCTTTTTCAACGGTTTCCGCCGTGATGCCCACCCGATGGCCGTCATGTGCGGCGTAGTCGGCGCCCTGTCGGCGTTCTATCACGACTCGCTGGACATCAATAACCCGCAGCACCGCGAGATTTCTGC…
162	CCE0944	FRA	Leaf_litter	KJ878034		Berge et al., 2014	GACGTACGCGGTCTCACCGCCACCGGCCGCTTCACATTTGACCCTGGCTTCATGTCCACGGCATCTTGCGAGTCGAAGATCACCTACATCGATGGTGATAATGGAATTCTGCTTCACCGCGGCTACCCGATCGAACAACTGGCCGAGCAGTCCGATTATCTGGAAACCTGCTACCTGCTGCTTAATGGCGAATTGCCAACCGCCGAGCAGAAAGCCCAGTTCGTTGCCGTGGTCAAAAACCACACGATGGTTCACGAACAGCTCAAGACCTTTTTCAACGGTTTCCGCCGTGATGCCCACCCGATGGCCGTCATGTGCGGCGTAGTCGGCGCCCTGTCGGCGTTCTATCACGACTCGCTGGACATCAATAACCCGCAGCACCGCGAGATTTCTGCCGTG…
162	CCV0137	FRA	Freshwater	KJ878060		Berge et al., 2014	GCCCCCGTCGAGCTGCCAATTCTGACGGGTACAGTGGGTCCGGACGTGATCGACGTACGCGGTCTCACCGCCACCGGCCGCTTCACATTTGACCCTGGCTTCATGTCCACGGCATCTTGCGAGTCGAAGATCACCTACATCGATGGTGATAATGGAATTCTGCTTCACCGCGGCTACCCGATCGAACAACTGGCCGAGCAGTCCGATTATCTGGAAACCTGCTACCTGCTGCTTAATGGCGAATTGCCAACCGCCGAGCAGAAAGCCCAGTTCGTTGCCGTGGTCAAAAACCACACGATGGTTCACGAACAGCTCAAGACCTTTTTCAACGGTTTCCGCCGTGATGCCCACCCGATGGCCGTCATGTGCGGCGTAGTCGGCGCCCTGTCGGCGTTCTAT…
162	CEB0007	FRA	Biofilm	KJ878095		Berge et al., 2014	GGGCGCTGCCCCCGTCGAGCTGCCAATTCTGACGGGTACAGTGGGTCCGGACGTGATCGACGTACGCGGTCTCACCGCCACCGGCCGCTTCACATTTGACCCTGGCTTCATGTCCACGGCATCTTGCGAGTCGAAGATCACCTACATCGATGGTGATAATGGAATTCTGCTTCACCGCGGCTACCCGATCGAACAACTGGCCGAGCAGTCCGATTATCTGGAAACCTGCTACCTGCTGCTTAATGGCGAATTGCCAACCGCCGAGCAGAAAGCCCAGTTCGTTGCCGTGGTCAAAAACCACACGATGGTTCACGAACAGCTCAAGACCTTTTTCAACGGTTTCCGCCGTGATGCCCACCCGATGGCCGTCATGTGCGGCGTAGTCGGCGCCCTGTCGGC…
162	CLA0175	FRA	Snowpack	KJ878113		Berge et al., 2014	GAGGGCGCTGCCCCCGTCGAGCTGCCAATTCTGACGGGTACAGTGGGTCCGGACGTGATCGACGTACGCGGTCTCACCGCCACCGGCCGCTTCACATTTGACCCTGGCTTCATGTCCACGGCATCTTGCGAGTCGAAGATCACCTACATCGATGGTGATAATGGAATTCTGCTTCACCGCGGCTACCCGATCGAACAACTGGCCGAGCAGTCCGATTATCTGGAAACCTGCTACCTGCTGCTTAATGGCGAATTGCCAACCGCCGAGCAGAAAGCCCAGTTCGTTGCCGTGGTCAAAAACCACACGATGGTTCACGAACAGCTCAAGACCTTTTTCAACGGTTTCCGCCGTGATGCCCACCCGATGGCCGTCATGTGCGGCGTAGTCGGCGCCCTGTCG…
162	CLA0189	FRA	Snowpack	KJ878114		Berge et al., 2014	GAGGGCGCTGCCCCCGTCGAGCTGCCAATTCTGACGGGTACAGTGGGTCCGGACGTGATCGACGTACGCGGTCTCACCGCCACCGGCCGCTTCACATTTGACCCTGGCTTCATGTCCACGGCATCTTGCGAGTCGAAGATCACCTACATCGATGGTGATAATGGAATTCTGCTTCACCGCGGCTACCCGATCGAACAACTGGCCGAGCAGTCCGATTATCTGGAAACCTGCTACCTGCTGCTTAATGGCGAATTGCCAACCGCCGAGCAGAAAGCCCAGTTCGTTGCCGTGGTCAAAAACCACACGATGGTTCACGAACAGCTCAAGACCTTTTTCAACGGTTTCCGCCGTGATGCCCACCCGATGGCCGTCATGTGCGGCGTAGTCGGCGCCCTGTCG…
162	CLA0201	FRA	Snowpack	KJ878117		Berge et al., 2014	GAGGGCGCTGCCCCCGTCGAGCTGCCAATTCTGACGGGTACAGTGGGTCCGGACGTGATCGACGTACGCGGTCTCACCGCCACCGGCCGCTTCACATTTGACCCTGGCTTCATGTCCACGGCATCTTGCGAGTCGAAGATCACCTACATCGATGGTGATAATGGAATTCTGCTTCACCGCGGCTACCCGATCGAACAACTGGCCGAGCAGTCCGATTATCTGGAAACCTGCTACCTGCTGCTTAATGGCGAATTGCCAACCGCCGAGCAGAAAGCCCAGTTCGTTGCCGTGGTCAAAAACCACACGATGGTTCACGAACAGCTCAAGACCTTTTTCAACGGTTTCCGCCGTGATGCCCACCCGATGGCCGTCATGTGCGGCGTAGTCGGCGCCCTGTCG…
162	CLA0206	FRA	Snowpack	KJ878118		Berge et al., 2014	GAGGGCGCTGCCCCCGTCGAGCTGCCAATTCTGACGGGTACAGTGGGTCCGGACGTGATCGACGTACGCGGTCTCACCGCCACCGGCCGCTTCACATTTGACCCTGGCTTCATGTCCACGGCATCTTGCGAGTCGAAGATCACCTACATCGATGGTGATAATGGAATTCTGCTTCACCGCGGCTACCCGATCGAACAACTGGCCGAGCAGTCCGATTATCTGGAAACCTGCTACCTGCTGCTTAATGGCGAATTGCCAACCGCCGAGCAGAAAGCCCAGTTCGTTGCCGTGGTCAAAAACCACACGATGGTTCACGAACAGCTCAAGACCTTTTTCAACGGTTTCCGCCGTGATGCCCACCCGATGGCCGTCATGTGCGGCGTAGTCGGCGCCCTGTCG…
162	CLA0239	FRA	Snowpack	KJ878126		Berge et al., 2014	GTCTCACCGCCACCGGCCGCTTCACATTTGACCCTGGCTTCATGTCCACGGCATCTTGCGAGTCGAAGATCACCTACATCGATGGTGATAATGGAATTCTGCTTCACCGCGGCTACCCGATCGAACAACTGGCCGAGCAGTCCGATTATCTGGAAACCTGCTACCTGCTGCTTAATGGCGAATTGCCAACCGCCGAGCAGAAAGCCCAGTTCGTTGCCGTGGTCAAAAACCACACGATGGTTCACGAACAGCTCAAGACCTTTTTCAACGGTTTCCGCCGTGATGCCCACCCGATGGCCGTCATGTGCGGCGTAGTCGGCGCCCTGTCGGCGTTCTATCACGACTCGCTGGACATCAATAACCCGCAGCACCGCGAGATTTCTGCCGTGCGCCTGGTCG…
162	CLA0275	FRA	Leaf_litter	KJ878129		Berge et al., 2014	GAGGGCGCTGCCCCCGTCGAGCTGCCAATTCTGACGGGTACAGTGGGTCCGGACGTGATCGACGTACGCGGTCTCACCGCCACCGGCCGCTTCACATTTGACCCTGGCTTCATGTCCACGGCATCTTGCGAGTCGAAGATCACCTACATCGATGGTGATAATGGAATTCTGCTTCACCGCGGCTACCCGATCGAACAACTGGCCGAGCAGTCCGATTATCTGGAAACCTGCTACCTGCTGCTTAATGGCGAATTGCCAACCGCCGAGCAGAAAGCCCAGTTCGTTGCCGTGGTCAAAAACCACACGATGGTTCACGAACAGCTCAAGACCTTTTTCAACGGTTTCCGCCGTGATGCCCACCCGATGGCCGTCATGTGCGGCGTAGTCGGCGCCCTGTCG…
162	CLA0283	FRA	Leaf_litter	KJ878131		Berge et al., 2014	GAGGGCGCTGCCCCCGTCGAGCTGCCAATTCTGACGGGTACAGTGGGTCCGGACGTGATCGACGTACGCGGTCTCACCGCCACCGGCCGCTTCACATTTGACCCTGGCTTCATGTCCACGGCATCTTGCGAGTCGAAGATCACCTACATCGATGGTGATAATGGAATTCTGCTTCACCGCGGCTACCCGATCGAACAACTGGCCGAGCAGTCCGATTATCTGGAAACCTGCTACCTGCTGCTTAATGGCGAATTGCCAACCGCCGAGCAGAAAGCCCAGTTCGTTGCCGTGGTCAAAAACCACACGATGGTTCACGAACAGCTCAAGACCTTTTTCAACGGTTTCCGCCGTGATGCCCACCCGATGGCCGTCATGTGCGGCGTAGTCGGCGCCCTGTCG…
162	CLA0325	FRA	Leaf_litter	KJ878135		Berge et al., 2014	GAGGGCGCTGCCCCCGTCGAGCTGCCAATTCTGACGGGTACAGTGGGTCCGGACGTGATCGACGTACGCGGTCTCACCGCCACCGGCCGCTTCACATTTGACCCTGGCTTCATGTCCACGGCATCTTGCGAGTCGAAGATCACCTACATCGATGGTGATAATGGAATTCTGCTTCACCGCGGCTACCCGATCGAACAACTGGCCGAGCAGTCCGATTATCTGGAAACCTGCTACCTGCTGCTTAATGGCGAATTGCCAACCGCCGAGCAGAAAGCCCAGTTCGTTGCCGTGGTCAAAAACCACACGATGGTTCACGAACAGCTCAAGACCTTTTTCAACGGTTTCCGCCGTGATGCCCACCCGATGGCCGTCATGTGCGGCGTAGTCGGCGCCCTGTCG…
162	CLA0500	FRA	Rain	KJ878139		Berge et al., 2014	AGGGCGCTGCCCCCGTCGAGCTGCCAATTCTGACGGGTACAGTGGGTCCGGACGTGATCGACGTACGCGGTCTCACCGCCACCGGCCGCTTCACATTTGACCCTGGCTTCATGTCCACGGCATCTTGCGAGTCGAAGATCACCTACATCGATGGTGATAATGGAATTCTGCTTCACCGCGGCTACCCGATCGAACAACTGGCCGAGCAGTCCGATTATCTGGAAACCTGCTACCTGCTGCTTAATGGCGAATTGCCAACCGCCGAGCAGAAAGCCCAGTTCGTTGCCGTGGTCAAAAACCACACGATGGTTCACGAACAGCTCAAGACCTTTTTCAACGGTTTCCGCCGTGATGCCCACCCGATGGCCGTCATGTGCGGCGTAGTCGGCGCCCTGTCGG…
163	CCE0244	FRA	Freshwater	KJ877968		Berge et al., 2014	GCCCCCGTCGAGCTGCCAATTCTGACGGGTACAGTGGGTCCGGACGTGATCGACGTACGCGGTCTCACCGCCACCGGCCGCTTCACATTTGACCCTGGCTTCATGTCCACGGCATCTTGCGAGTCGAAGATCACCTACATCGACGGTGATAACGGAATCCTGCTTCACCGCGGCTACCCGATCGAGCAACTGGCCGAGCAGTCCGATTACCTGGAAACCTGCTACCTGCTGCTCAATGGCGAATTGCCAACTGCCGAGCAGAAAGCCCAGTTCGTTGCCGTGGTCAAGAACCACACGATGGTTCACGAACAGCTCAAGACCTTTTTCAACGGCTTCCGCCGTGATGCCCACCCGATGGCCGTCATGTGCGGCGTAGTCGGCGCCCTGTCGGCGTTCTAT…
163	CCV0202	FRA	Freshwater	KJ878070		Berge et al., 2014	GCCCCCGTCGAGCTGCCAATTCTGACGGGTACAGTGGGTCCGGACGTGATCGACGTACGCGGTCTCACCGCCACCGGCCGCTTCACATTTGACCCTGGCTTCATGTCCACGGCATCTTGCGAGTCGAAGATCACCTACATCGACGGTGATAACGGAATCCTGCTTCACCGCGGCTACCCGATCGAGCAACTGGCCGAGCAGTCCGATTACCTGGAAACCTGCTACCTGCTGCTCAATGGCGAATTGCCAACTGCCGAGCAGAAAGCCCAGTTCGTTGCCGTGGTCAAGAACCACACGATGGTTCACGAACAGCTCAAGACCTTTTTCAACGGCTTCCGCCGTGATGCCCACCCGATGGCCGTCATGTGCGGCGTAGTCGGCGCCCTGTCGGCGTTCTAT…
163	CCV0210	FRA	Freshwater	KJ878073		Berge et al., 2014	GCCCCCGTCGAGCTGCCAATTCTGACGGGTACAGTGGGTCCGGACGTGATCGACGTACGCGGTCTCACCGCCACCGGCCGCTTCACATTTGACCCTGGCTTCATGTCCACGGCATCTTGCGAGTCGAAGATCACCTACATCGACGGTGATAACGGAATCCTGCTTCACCGCGGCTACCCGATCGAGCAACTGGCCGAGCAGTCCGATTACCTGGAAACCTGCTACCTGCTGCTCAATGGCGAATTGCCAACTGCCGAGCAGAAAGCCCAGTTCGTTGCCGTGGTCAAGAACCACACGATGGTTCACGAACAGCTCAAGACCTTTTTCAACGGCTTCCGCCGTGATGCCCACCCGATGGCCGTCATGTGCGGCGTAGTCGGCGCCCTGTCGGCGTTCTAT…
163	CCV0214	FRA	Freshwater	KJ878075		Berge et al., 2014	GCCCCCGTCGAGCTGCCAATTCTGACGGGTACAGTGGGTCCGGACGTGATCGACGTACGCGGTCTCACCGCCACCGGCCGCTTCACATTTGACCCTGGCTTCATGTCCACGGCATCTTGCGAGTCGAAGATCACCTACATCGACGGTGATAACGGAATCCTGCTTCACCGCGGCTACCCGATCGAGCAACTGGCCGAGCAGTCCGATTACCTGGAAACCTGCTACCTGCTGCTCAATGGCGAATTGCCAACTGCCGAGCAGAAAGCCCAGTTCGTTGCCGTGGTCAAGAACCACACGATGGTTCACGAACAGCTCAAGACCTTTTTCAACGGCTTCCGCCGTGATGCCCACCCGATGGCCGTCATGTGCGGCGTAGTCGGCGCCCTGTCGGCGTTCTAT…
163	CSZ0423	FRA	Freshwater	KJ878267		Berge et al., 2014	GCCCCCGTCGAGCTGCCAATTCTGACGGGTACAGTGGGTCCGGACGTGATCGACGTACGCGGTCTCACCGCCACCGGCCGCTTCACATTTGACCCTGGCTTCATGTCCACGGCATCTTGCGAGTCGAAGATCACCTACATCGACGGTGATAACGGAATCCTGCTTCACCGCGGCTACCCGATCGAGCAACTGGCCGAGCAGTCCGATTACCTGGAAACCTGCTACCTGCTGCTCAATGGCGAATTGCCAACTGCCGAGCAGAAAGCCCAGTTCGTTGCCGTGGTCAAGAACCACACGATGGTTCACGAACAGCTCAAGACCTTTTTCAACGGCTTCCGCCGTGATGCCCACCCGATGGCCGTCATGTGCGGCGTAGTCGGCGCCCTGTCGGCGTTCTAT…
163	CSZ0424	FRA	Freshwater	KJ878268		Berge et al., 2014	GCCCCCGTCGAGCTGCCAATTCTGACGGGTACAGTGGGTCCGGACGTGATCGACGTACGCGGTCTCACCGCCACCGGCCGCTTCACATTTGACCCTGGCTTCATGTCCACGGCATCTTGCGAGTCGAAGATCACCTACATCGACGGTGATAACGGAATCCTGCTTCACCGCGGCTACCCGATCGAGCAACTGGCCGAGCAGTCCGATTACCTGGAAACCTGCTACCTGCTGCTCAATGGCGAATTGCCAACTGCCGAGCAGAAAGCCCAGTTCGTTGCCGTGGTCAAGAACCACACGATGGTTCACGAACAGCTCAAGACCTTTTTCAACGGCTTCCGCCGTGATGCCCACCCGATGGCCGTCATGTGCGGCGTAGTCGGCGCCCTGTCGGCGTTCTAT…
163	SZB0071	FRA	Biofilm	KJ878478		Berge et al., 2014	GAGGGCGCTGCCCCCGTCGAGCTGCCAATTCTGACGGGTACAGTGGGTCCGGACGTGATCGACGTACGCGGTCTCACCGCCACCGGCCGCTTCACATTTGACCCTGGCTTCATGTCCACGGCATCTTGCGAGTCGAAGATCACCTACATCGACGGTGATAACGGAATCCTGCTTCACCGCGGCTACCCGATCGAGCAACTGGCCGAGCAGTCCGATTACCTGGAAACCTGCTACCTGCTGCTCAATGGCGAATTGCCAACTGCCGAGCAGAAAGCCCAGTTCGTTGCCGTGGTCAAGAACCACACGATGGTTCACGAACAGCTCAAGACCTTTTTCAACGGCTTCCGCCGTGATGCCCACCCGATGGCCGTCATGTGCGGCGTAGTCGGCGCCCTGTCG…
163	38B10	FRA	Cloud	NA		Joly et al, 2013	GGGCGCTGCCCCCGTCGAGCTGCCAATTCTGACCGGTACAGTGGGTCCGGACGTGATCGACGTACGCGGCCTGACCGCCACCGGCCGCTTCACATTTGACCCTGGTTTCATGTCCACGGCCTCTTGCGATTCGAGGATCACCTACATCGATGGTGATAATGGCATTCTGCTACACCGCGGCTACCCGATCGAACAACTGGCCGAGCAGTCCGACTATCTCGAAACCTGCTACCTGCTGCTCAACGGTGAACTGCCCACCGCCGAGCAGAAAGCCCAGTTCGTGGCCGTGGTCAAGAACCACACGATGGTTCACGAACAGCTCAAGACCTTTTTCAACGGTTTCCGCCGCGACGCCCACCCGATGGCCGTCATGTGTGGCGTAGTCGGCGCCCTGTCAGC…
164	CCE0064	FRA	Freshwater	KJ877917		Berge et al., 2014	GCCCCCGTCGAGCTGCCAATTCTGACGGGTACAGTGGGTCCGGACGTGATCGACGTACGCGGTCTCACCGCCACCGGCCGCTTCACATTTGACCCTGGCTTCATGTCCACGGCATCTTGCGAGTCGAAGATCACCTACATCGATGGTGATAACGGAATCCTGCTTCACCGCGGCTACCCGATCGAACAACTGGCCGAGCAGTCCGATTATCTGGAAACCTGCTACCTGCTGCTAAATGGCGAATTGCCAACAGCCGAGCAAAAAGCCCAGTTCGTTGCCGTGGTCAAGAACCACACGATGGTTCACGAACAGCTCAAGACCTTTTTCAACGGCTTCCGCCGTGATGCCCACCCGATGGCCGTCATGTGCGGCGTAGTCGGCGCCCTGTCGGCGTTCTAT…
164	CCE0095	FRA	Snowpack	KJ877924		Berge et al., 2014	TCCAGATAATCGGACTGCTCGGCCAGTTGTTCGATCGGGTAGCCGCGGTGAAGCAGGATTCCGTTATCACCATCGATGGAGTTGATCCATCGAGGGCGCTGCCCCCGTCGAGCTGCCAATTCTGACGGGTACAGTGGGTCCGGACGTGATCGACGTACGCGGTCTCACCGCCACCGGCCGCTTCACATTTGACCCTGGCTTCATGTCCACGGCATCTTGCGAGTCGAAGATCACCTACATCGATGGTGATAACGGAATCCTGCTTCACCGCGGCTACCCGATCGAACAACTGGCCGAGCAGTCCGATTATCTGGAAACCTGCTACCTGCTGCTAAATGGCGAATTGCCAACAGCCGAGCAAAAAGCCCAGTTCGTTGCCGTGGTCAAGAACCACACGAT…
164	CCE0099	FRA	Snowpack	KJ877927		Berge et al., 2014	CTGCTCGGCCAGTTGTTCGATCGGGTAGCCGCGGTGAAGCAGGATTCCGTTATCACCATCGATGCAGTTGATCCATCGAGGGCGCTGCCCCCGTCGAGCTGCCAATTCTGACGGGTACAGTGGGTCCGGACGTGATCGACGTACGCGGTCTCACCGCCACCGGCCGCTTCACATTTGACCCTGGCTTCATGTCCACGGCATCTTGCGAGTCGAAGATCACCTACATCGATGGTGATAACGGAATCCTGCTTCACCGCGGCTACCCGATCGAACAACTGGCCGAGCAGTCCGATTATCTGGAAACCTGCTACCTGCTGCTAAATGGCGAATTGCCAACAGCCGAGCAAAAAGCCCAGTTCGTTGCCGTGGTCAAGAACCACACGATGGTTCACGAACAGC…
164	CCE0100	FRA	Snowpack	KJ877928		Berge et al., 2014	GACTGCTCGGCCAGTTGTTCGATCGGGTAGCCGCGGTGAAGCAGGATTCCGTTATCACCATCGATGCAGTTGATCCATCGAGGGCGCTGCCCCCGTCGAGCTGCCAATTCTGACGGGTACAGTGGGTCCGGACGTGATCGACGTACGCGGTCTCACCGCCACCGGCCGCTTCACATTTGACCCTGGCTTCATGTCCACGGCATCTTGCGAGTCGAAGATCACCTACATCGATGGTGATAACGGAATCCTGCTTCACCGCGGCTACCCGATCGAACAACTGGCCGAGCAGTCCGATTATCTGGAAACCTGCTACCTGCTGCTAAATGGCGAATTGCCAACAGCCGAGCAAAAAGCCCAGTTCGTTGCCGTGGTCAAGAACCACACGATGGTTCACGAACA…
164	CCE0220	FRA	Freshwater	KJ877960		Berge et al., 2014	CACCGGCCGCTTCACATTTGACCCTGGCTTCATGTCCACGGCATCTTGCGAGTCGAAGATCACCTACATCGATGGTGATAACGGAATCCTGCTTCACCGCGGCTACCCGATCGAACAACTGGCCGAGCAGTCCGATTATCTGGAAACCTGCTACCTGCTGCTAAATGGCGAATTGCCAACAGCCGAGCAAAAAGCCCAGTTCGTTGCCGTGGTCAAGAACCACACGATGGTTCACGAACAGCTCAAGACCTTTTTCAACGGCTTCCGCCGTGATGCCCACCCGATGGCCGTCATGTGCGGCGTAGTCGGCGCCCGTCGGC
164	CCE0643	FRA	Leaf_litter	KJ877993		Berge et al., 2014	GACGTACGCGGTCTCACCGCCACCGGCCGCTTCACATTTGACCCTGGCTTCATGTCCACGGCATCTTGCGAGTCGAAGATCACCTACATCGATGGTGATAACGGAATCCTGCTTCACCGCGGCTACCCGATCGAACAACTGGCCGAGCAGTCCGATTATCTGGAAACCTGCTACCTGCTGCTAAATGGCGAATTGCCAACAGCCGAGCAAAAAGCCCAGTTCGTTGCCGTGGTCAAGAACCACACGATGGTTCACGAACAGCTCAAGACCTTTTTCAACGGCTTCCGCCGTGATGCCCACCCGATGGCCGTCATGTGCGGCGTAGTCGGCGCCCTGTCGGCGTTCTATCACGACTCGCTGGACATCAATAACCCCCAGCACCGCGAGATTTCTGCCGTG…
164	CCE0706	FRA	Snowpack	KJ878011		Berge et al., 2014	TCGACGTACGCGGTCTCACCGCCACCGGCCGCTTCACATTTGACCCTGGCTTCATGTCCACGGCATCTTGCGAGTCGAAGATCACCTACATCGATGGTGATAACGGAATCCTGCTTCACCGCGGCTACCCGATCGAACAACTGGCCGAGCAGTCCGATTATCTGGAAACCTGCTACCTGCTGCTAAATGGCGAATTGCCAACAGCCGAGCAAAAAGCCCAGTTCGTTGCCGTGGTCAAGAACCACACGATGGTTCACGAACAGCTCAAGACCTTTTTCAACGGCTTCCGCCGTGATGCCCACCCGATGGCCGTCATGTGCGGCGTAGTCGGCGCCCTGTCGGCGTTCTATCACGACTCGCTGGACATCAATAACCCCCAGCACCGCGAGATTTCTGCCG…
164	CCE0908	FRA	Leaf_litter	KJ878026		Berge et al., 2014	GACGTACGCGGTCTCACCGCCACCGGCCGCTTCACATTTGACCCTGGCTTCATGTCCACGGCATCTTGCGAGTCGAAGATCACCTACATCGATGGTGATAACGGAATCCTGCTTCACCGCGGCTACCCGATCGAACAACTGGCCGAGCAGTCCGATTATCTGGAAACCTGCTACCTGCTGCTAAATGGCGAATTGCCAACAGCCGAGCAAAAAGCCCAGTTCGTTGCCGTGGTCAAGAACCACACGATGGTTCACGAACAGCTCAAGACCTTTTTCAACGGCTTCCGCCGTGATGCCCACCCGATGGCCGTCATGTGCGGCGTAGTCGGCGCCCTGTCGGCGTTCTATCACGACTCGCTGGACATCAATAACCCCCAGCACCGCGAGATTTCTGCCGTG…
164	CCE0974	FRA	Freshwater	KJ878039		Berge et al., 2014	GCCCCCGTCGAGCTGCCAATTCTGACGGGTACAGTGGGTCCGGACGTGATCGACGTACGCGGTCTCACCGCCACCGGCCGCTTCACATTTGACCCTGGCTTCATGTCCACGGCATCTTGCGAGTCGAAGATCACCTACATCGATGGTGATAACGGAATCCTGCTTCACCGCGGCTACCCGATCGAACAACTGGCCGAGCAGTCCGATTATCTGGAAACCTGCTACCTGCTGCTAAATGGCGAATTGCCAACAGCCGAGCAAAAAGCCCAGTTCGTTGCCGTGGTCAAGAACCACACGATGGTTCACGAACAGCTCAAGACCTTTTTCAACGGCTTCCGCCGTGATGCCCACCCGATGGCCGTCATGTGCGGCGTAGTCGGCGCCCTGTCGGCGTTCTAT…
164	CEB0089	FRA	Biofilm	KJ878106		Berge et al., 2014	GAGGGCGCTGCCCCCGTCGAGCTGCCAATTCTGACGGGTACAGTGGGTCCGGACGTGATCGACGTACGCGGTCTCACCGCCACCGGCCGCTTCACATTTGACCCTGGCTTCATGTCCACGGCATCTTGCGAGTCGAAGATCACCTACATCGATGGTGATAACGGAATCCTGCTTCACCGCGGCTACCCGATCGAACAACTGGCCGAGCAGTCCGATTATCTGGAAACCTGCTACCTGCTGCTAAATGGCGAATTGCCAACAGCCGAGCAAAAAGCCCAGTTCGTTGCCGTGGTCAAGAACCACACGATGGTTCACGAACAGCTCAAGACCTTTTTCAACGGCTTCCGCCGTGATGCCCACCCGATGGCCGTCATGTGCGGCGTAGTCGGCGCCCTGTCG…
164	CVB0092	FRA	Biofilm	KJ878317		Berge et al., 2014	GAGGGCGCTGCCCCCGTCGAGCTGCCAATTCTGACGGGTACAGTGGGTCCGGACGTGATCGACGTACGCGGTCTCACCGCCACCGGCCGCTTCACATTTGACCCTGGCTTCATGTCCACGGCATCTTGCGAGTCGAAGATCACCTACATCGATGGTGATAACGGAATCCTGCTTCACCGCGGCTACCCGATCGAACAACTGGCCGAGCAGTCCGATTATCTGGAAACCTGCTACCTGCTGCTAAATGGCGAATTGCCAACAGCCGAGCAAAAAGCCCAGTTCGTTGCCGTGGTCAAGAACCACACGATGGTTCACGAACAGCTCAAGACCTTTTTCAACGGCTTCCGCCGTGATGCCCACCCGATGGCCGTCATGTGCGGCGTAGTCGGCGCCCTGTCG…
165	CC1583	FRA	Biofilm	AVEF00000000		Berge et al., 2014	ATGGCTGAGAAAAAAGCGCAGTTGATCATCGAGGGTGCTGCCCCCGTCGAGCTGCCAATTCTGACGGGTACAGTGGGTCCGGACGTGATCGACGTACGCGGTCTCACCGCCACCGGCCGCTTCACATTTGACCCTGGCTTCATGTCCACGGCATCTTGCGAGTCGAAGATCACCTACATCGATGGTGATAACGGAATCCTGCTTCACCGCGGCTACCCGATCGAGCAACTGGCCGAGCAGTCCGACTATCTGGAAACCTGCTACCTGCTGCTCAATGGCGAACTGCCAACTGCCGAGCAGAAAGCCCAGTTCGTTGCCGTGGTCAAGAACCACACGATGGTTCACGAACAGCTCAAGACCTTTTTCAACGGCTTCCGCCGTGATGCCCACCCGATGGCC…
165	CCE0594	FRA	Snowpack	KJ877985		Berge et al., 2014	TCGACGTACGCGGTCTCACCGCCACCGGCCGCTTCACATTTGACCCTGGCTTCATGTCCACGGCATCTTGCGAGTCGAAGATCACCTACATCGATGGTGATAACGGAATCCTGCTTCACCGCGGCTACCCGATCGAGCAACTGGCCGAGCAGTCCGACTATCTGGAAACCTGCTACCTGCTGCTCAATGGCGAACTGCCAACTGCCGAGCAGAAAGCCCAGTTCGTTGCCGTGGTCAAGAACCACACGATGGTTCACGAACAGCTCAAGACCTTTTTCAACGGCTTCCGCCGTGATGCCCACCCGATGGCCGTCATGTGCGGCGTGGTCGGGGCCCTGTCGGCGTTCTATCACGACTCGCTGGACATCAATAACCCGCAGCACCGCGAGATTTCTGCCG…
165	CSZ0221	FRA	Freshwater	KJ878214		Berge et al., 2014	GCCCCCGTCGAGCTGCCAATTCTGACGGGTACAGTGGGTCCGGACGTGATCGACGTACGCGGTCTCACCGCCACCGGCCGCTTCACATTTGACCCTGGCTTCATGTCCACGGCATCTTGCGAGTCGAAGATCACCTACATCGATGGTGATAACGGAATCCTGCTTCACCGCGGCTACCCGATCGAGCAACTGGCCGAGCAGTCCGACTATCTGGAAACCTGCTACCTGCTGCTCAATGGCGAACTGCCAACTGCCGAGCAGAAAGCCCAGTTCGTTGCCGTGGTCAAGAACCACACGATGGTTCACGAACAGCTCAAGACCTTTTTCAACGGCTTCCGCCGTGATGCCCACCCGATGGCCGTCATGTGCGGCGTGGTCGGGGCCCTGTCGGCGTTCTAT…
165	SZ0119	FRA	Freshwater	KJ878452		Berge et al., 2014	CGTGATCGACGTACGCGGTCTCACCGCCACCGGCCGCTTCACATTTGACCCTGGCTTCATGTCCACGGCATCTTGCGAGTCGAAGATCACCTACATCGATGGTGATAACGGAATCCTGCTTCACCGCGGCTACCCGATCGAGCAACTGGCCGAGCAGTCCGACTATCTGGAAACCTGCTACCTGCTGCTCAATGGCGAACTGCCAACTGCCGAGCAGAAAGCCCAGTTCGTTGCCGTGGTCAAGAACCACACGATGGTTCACGAACAGCTCAAGACCTTTTTCAACGGCTTCCGCCGTGATGCCCACCCGATGGCCGTCATGTGCGGCGTGGTCGGGGCCCTGTCGGCGTTCTATCACGACTCGCTGGACATCAATAACCCGCAGCACCGCGAGATTTC…
165	SZB0008	FRA	Biofilm	KJ878467		Berge et al., 2014	GGGCGCTGCCCCCGTCGAGCTGCCAATTCTGACGGGTACAGTGGGTCCGGACGTGATCGACGTACGCGGTCTCACCGCCACCGGCCGCTTCACATTTGACCCTGGCTTCATGTCCACGGCATCTTGCGAGTCGAAGATCACCTACATCGATGGTGATAACGGAATCCTGCTTCACCGCGGCTACCCGATCGAGCAACTGGCCGAGCAGTCCGACTATCTGGAAACCTGCTACCTGCTGCTCAATGGCGAACTGCCAACTGCCGAGCAGAAAGCCCAGTTCGTTGCCGTGGTCAAGAACCACACGATGGTTCACGAACAGCTCAAGACCTTTTTCAACGGCTTCCGCCGTGATGCCCACCCGATGGCCGTCATGTGCGGCGTGGTCGGGGCCCTGTCGGC…
165	UB0370	FRA	Freshwater	KJ878518		Berge et al., 2014	AGTGATCGACGTACGCGGTCTCACCGCCACCGGCCGCTTCACATTTGACCCTGGCTTCATGTCCACGGCATCTTGCGAGTCGAAGATCACCTACATCGATGGTGATAACGGAATCCTGCTTCACCGCGGCTACCCGATCGAGCAACTGGCCGAGCAGTCCGACTATCTGGAAACCTGCTACCTGCTGCTCAATGGCGAACTGCCAACTGCCGAGCAGAAAGCCCAGTTCGTTGCCGTGGTCAAGAACCACACGATGGTTCACGAACAGCTCAAGACCTTTTTCAACGGCTTCCGCCGTGATGCCCACCCGATGGCCGTCATGTGCGGCGTGGTCGGGGCCCTGTCGGCGTTCTATCACGACTCGCTGGACATCAATAACCCGCAGCACCGCGAGATTTC…
165	UB0417	FRA	Freshwater	KJ878523		Berge et al., 2014	TGATCGACGTACGCGGTCTCACCGCCACCGGCCGCTTCACATTTGACCCTGGCTTCATGTCCACGGCATCTTGCGAGTCGAAGATCACCTACATCGATGGTGATAACGGAATCCTGCTTCACCGCGGCTACCCGATCGAGCAACTGGCCGAGCAGTCCGACTATCTGGAAACCTGCTACCTGCTGCTCAATGGCGAACTGCCAACTGCCGAGCAGAAAGCCCAGTTCGTTGCCGTGGTCAAGAACCACACGATGGTTCACGAACAGCTCAAGACCTTTTTCAACGGCTTCCGCCGTGATGCCCACCCGATGGCCGTCATGTGCGGCGTGGTCGGGGCCCTGTCGGCGTTCTATCACGACTCGCTGGACATCAATAACCCGCAGCACCGCGAGATTTCTG…
165	USA0106	USA	Freshwater	KJ878547		Berge et al., 2014	GTGATCGACGTACGCGGTCTCACCGCCACCGGCCGCTTCACATTTGACCCTGGCTTCATGTCCACGGCATCTTGCGAGTCGAAGATCACCTACATCGATGGTGATAACGGAATCCTGCTTCACCGCGGCTACCCGATCGAGCAACTGGCCGAGCAGTCCGACTATCTGGAAACCTGCTACCTGCTGCTCAATGGCGAACTGCCAACTGCCGAGCAGAAAGCCCAGTTCGTTGCCGTGGTCAAGAACCACACGATGGTTCACGAACAGCTCAAGACCTTTTTCAACGGCTTCCGCCGTGATGCCCACCCGATGGCCGTCATGTGCGGCGTGGTCGGGGCCCTGTCGGCGTTCTATCACGACTCGCTGGACATCAATAACCCGCAGCACCGCGAGATTTCT…
165	JFJ-0040	CHE	Snowfall	KY379252		Stopelli et al, 2017	GGGCGCTGCCCCCGTCGAGCTGCCCATTCTGACCGGCACCGTAGGTCCCGACGTCATCGACGTACGCGGCCTCACAGCCACCGGCCGCTTCACATTCGACCCAGGCTTCATGTCGACCGCGTCTTGCGAGTCGAAGATCACCTACATTGACGGTGACAACGGGATCCTGCTGCATCGCGGCTATCCGATCGAGCAACTGGCCGAACAGTCGGACTATCTCGAAACCTGCTACCTGCTGCTCAACGGTGAACTGCCAACCGCTGAACAGAAAGCCCAGTTCGTGGTTGTGGTCAAGAACCACACGATGGTCCACGAACAGCTGAAGACTTTCTTCAACGGCTTCCGTCGTGACGCTCACCCAATGGCGGTGATGTGCGGCGTGGTCGGAGCGCTGTCGGC…
166	CCV0132	FRA	Freshwater	KJ878058		Berge et al., 2014	GCCCCCGTCGAGCTGCCAATTCTGACGGGTACAGTGGGTCCGGACGTGATCGACGTACGCGGTCTCACCGCCACCGGCCGCTTCACATTTGACCCTGGCTTCATGTCCACGGCATCTTGCGAGTCGAAGATCACCTACATCGATGGTGATAACGGAATCCTGCTTCACCGCGGCTACCCGATCGAGCAACTGGCCGAGCAGTCCGACTATCTGGAAACCTGCTACCTGCTGCTCAATGGCGAACTGCCAACTGCCGAGCAGAAAGCCCAGTTCGTTGCCGTGGTCAAGAACCACACGATGGTTCACGAACAGCTCAAGACCTTTTTCAACGGCTTCCGCCGTGACGCCCACCCGATGGCCGTCATGTGCGGCGTGGTCGGGGCCCTGTCGGCGTTCTAT…
166	CSZ0181	FRA	Freshwater	KJ878209		Berge et al., 2014	GGCGCTGCCCCCGTCGAGCTGCCAATTCTGACGGGTACAGTGGGTCCGGACGTGATCGACGTACGCGGTCTCACCGCCACCGGCCGCTTCACATTTGACCCTGGCTTCATGTCCACGGCATCTTGCGAGTCGAAGATCACCTACATCGATGGTGATAACGGAATCCTGCTTCACCGCGGCTACCCGATCGAGCAACTGGCCGAGCAGTCCGACTATCTGGAAACCTGCTACCTGCTGCTCAATGGCGAACTGCCAACTGCCGAGCAGAAAGCCCAGTTCGTTGCCGTGGTCAAGAACCACACGATGGTTCACGAACAGCTCAAGACCTTTTTCAACGGCTTCCGCCGTGACGCCCACCCGATGGCCGTCATGTGCGGCGTGGTCGGGGCCCTGTCGGCG…
167	CCE0103	FRA	Snowpack	KJ877930		Berge et al., 2014	CTGCTCGGCCAGTTGCTCAATCGGGTAGCCGCGGTGAAGCAGGATTCCGTTATCACCATCGATGCAGTTGATCCATCGAGGGCGCTGCCCCCGTCGAGCTGCCAATTCTGACGGGTACAGTGGGTCCGGACGTGATCGACGTACGCGGTCTCACCGCCACCGGCCGCTTCACATTTGACCCTGGCTTCATGTCCACGGCATCTTGCGAGTCGAAGATCACCTACATCGATGGTGATAACGGAATCCTGCTTCACCGCGGCTACCCGATTGAGCAACTGGCCGAGCAGTCCGATTATCTGGAAACCTGCTACCTGCTGCTCAATGGCGAACTGCCAACTGCCGAGCAGAAAGCCCAGTTCGTTGCCGTGGTCAAGAACCACACGATGGTTCACGAACAGC…
167	CCE0189	FRA	Snowpack	KJ877951		Berge et al., 2014	TAATCGGACTGCTCGGCCAGTTGCTCAATCGGGTAGCCGCGGTGAAGCAGGATTCCGTTATCACCATCGATGGAGTTGATCATCGAGGGCGCTGCCCCCGTCGAGCTGCCAATTCTGACGGGTACAGTGGGTCCGGACGTGATCGACGTACGCGGTCTCACCGCCACCGGCCGCTTCACATTTGACCCTGGCTTCATGTCCACGGCATCTTGCGAGTCGAAGATCACCTACATCGATGGTGATAACGGAATCCTGCTTCACCGCGGCTACCCGATTGAGCAACTGGCCGAGCAGTCCGATTATCTGGAAACCTGCTACCTGCTGCTCAATGGCGAACTGCCAACTGCCGAGCAGAAAGCCCAGTTCGTTGCCGTGGTCAAGAACCACACGATGGTTCAC…
167	CCE0769	FRA	Snowpack	KJ878020		Berge et al., 2014	TGATCGACGTACGCGGTCTCACCGCCACCGGCCGCTTCACATTTGACCCTGGCTTCATGTCCACGGCATCTTGCGAGTCGAAGATCACCTACATCGATGGTGATAACGGAATCCTGCTTCACCGCGGCTACCCGATTGAGCAACTGGCCGAGCAGTCCGATTATCTGGAAACCTGCTACCTGCTGCTCAATGGCGAACTGCCAACTGCCGAGCAGAAAGCCCAGTTCGTTGCCGTGGTCAAGAACCACACGATGGTTCACGAACAGCTCAAGACCTTTTTCAACGGCTTCCGCCGTGATGCCCACCCGATGGCCGTCATGTGCGGCGTGGTCGGTGCCCTGTCGGCGTTCTATCACGACTCGCTGGACATCAATAACCCGCAGCACCGCGAGATTTCTG…
167	CCE0911	FRA	Leaf_litter	KJ878029		Berge et al., 2014	TACGCGGTCTCACCGCCACCGGCCGCTTCACATTTGACCCTGGCTTCATGTCCACGGCATCTTGCGAGTCGAAGATCACCTACATCGATGGTGATAACGGAATCCTGCTTCACCGCGGCTACCCGATTGAGCAACTGGCCGAGCAGTCCGATTATCTGGAAACCTGCTACCTGCTGCTCAATGGCGAACTGCCAACTGCCGAGCAGAAAGCCCAGTTCGTTGCCGTGGTCAAGAACCACACGATGGTTCACGAACAGCTCAAGACCTTTTTCAACGGCTTCCGCCGTGATGCCCACCCGATGGCCGTCATGTGCGGCGTGGTCGGTGCCCTGTCGGCGTTCTATCACGACTCGCTGGACATCAATAACCCGCAGCACCGCGAGATTTCTGCCGTGCGTC…
168	CCE0060	FRA	Freshwater	KJ877916		Berge et al., 2014	GCCCCCGTCGAGCTGCCAATTCTGACGGGTACAGTGGGTCCGGACGTGATCGACGTACGCGGTCTCACCGCCACCGGCCGCTTCACATTTGACCCTGGCTTCATGTCCACGGCATCTTGCGAGTCGAAGATCACCTACATCGATGGTGATAACGGAATCCTGCTTCACCGCGGCTACCCGATCGAGCAACTGGCCGAGCAGTCCGATTATCTGGAAACCTGCTACCTGCTGCTCAATGGCGAACTGCCAACTGCCGAGCAGAAAGCCCAGTTCGTTGCCGTGGTCAAGAACCACACGATGGTTCACGAACAGCTCAAGACCTTTTTCAACGGCTTCCGCCGTGATGCCCACCCGATGGCCGTCATGTGCGGCGTGGTCGGTGCCCTGTCGGCGTTCTAT…
168	CCE0084	FRA	Freshwater	KJ877923		Berge et al., 2014	GCCCCCGTCGAGCTGCCAATTCTGACGGGTACAGTGGGTCCGGACGTGATCGACGTACGCGGTCTCACCGCCACCGGCCGCTTCACATTTGACCCTGGCTTCATGTCCACGGCATCTTGCGAGTCGAAGATCACCTACATCGATGGTGATAACGGAATCCTGCTTCACCGCGGCTACCCGATCGAGCAACTGGCCGAGCAGTCCGATTATCTGGAAACCTGCTACCTGCTGCTCAATGGCGAACTGCCAACTGCCGAGCAGAAAGCCCAGTTCGTTGCCGTGGTCAAGAACCACACGATGGTTCACGAACAGCTCAAGACCTTTTTCAACGGCTTCCGCCGTGATGCCCACCCGATGGCCGTCATGTGCGGCGTGGTCGGTGCCCTGTCGGCGTTCTAT…
168	CCE0114	FRA	Freshwater	KJ877932		Berge et al., 2014	GCCCCCGTCGAGCTGCCAATTCTGACGGGTACAGTGGGTCCGGACGTGATCGACGTACGCGGTCTCACCGCCACCGGCCGCTTCACATTTGACCCTGGCTTCATGTCCACGGCATCTTGCGAGTCGAAGATCACCTACATCGATGGTGATAACGGAATCCTGCTTCACCGCGGCTACCCGATCGAGCAACTGGCCGAGCAGTCCGATTATCTGGAAACCTGCTACCTGCTGCTCAATGGCGAACTGCCAACTGCCGAGCAGAAAGCCCAGTTCGTTGCCGTGGTCAAGAACCACACGATGGTTCACGAACAGCTCAAGACCTTTTTCAACGGCTTCCGCCGTGATGCCCACCCGATGGCCGTCATGTGCGGCGTGGTCGGTGCCCTGTCGGCGTTCTAT…
168	CCE0179	FRA	Snowpack	KJ877941		Berge et al., 2014	GACTGCTCGGCCAGTTGCTCGATCGGGTAGCCGCGGTGAAGCAGGATTCCGTTATCACCATCGATGCAGTTGATCCATCGAGGGCGCTGCCCCCGTCGAGCTGCCAATTCTGACGGGTACAGTGGGTCCGGACGTGATCGACGTACGCGGTCTCACCGCCACCGGCCGCTTCACATTTGACCCTGGCTTCATGTCCACGGCATCTTGCGAGTCGAAGATCACCTACATCGATGGTGATAACGGAATCCTGCTTCACCGCGGCTACCCGATCGAGCAACTGGCCGAGCAGTCCGATTATCTGGAAACCTGCTACCTGCTGCTCAATGGCGAACTGCCAACTGCCGAGCAGAAAGCCCAGTTCGTTGCCGTGGTCAAGAACCACACGATGGTTCACGAACA…
168	CCE0180	FRA	Snowpack	KJ877942		Berge et al., 2014	GACTGCTCGGCCAGTTGCTCGATCGGGTAGCCGCGGTGAAGCAGGATTCCGTTATCACCATCGATGCAGTTGATCCATCGAGGGCGCTGCCCCCGTCGAGCTGCCAATTCTGACGGGTACAGTGGGTCCGGACGTGATCGACGTACGCGGTCTCACCGCCACCGGCCGCTTCACATTTGACCCTGGCTTCATGTCCACGGCATCTTGCGAGTCGAAGATCACCTACATCGATGGTGATAACGGAATCCTGCTTCACCGCGGCTACCCGATCGAGCAACTGGCCGAGCAGTCCGATTATCTGGAAACCTGCTACCTGCTGCTCAATGGCGAACTGCCAACTGCCGAGCAGAAAGCCCAGTTCGTTGCCGTGGTCAAGAACCACACGATGGTTCACGAACA…
168	CCE0181	FRA	Snowpack	KJ877943		Berge et al., 2014	ATAATCGGACTGCTCGGCCAGTTGCTCGATCGGGTAGCCGCGGTGAAGCAGGATTCCGTTATCACCATCGATGGAGTTGATCCATCGAGGGCGCTGCCCCCGTCGAGCTGCCAATTCTGACGGGTACAGTGGGTCCGGACGTGATCGACGTACGCGGTCTCACCGCCACCGGCCGCTTCACATTTGACCCTGGCTTCATGTCCACGGCATCTTGCGAGTCGAAGATCACCTACATCGATGGTGATAACGGAATCCTGCTTCACCGCGGCTACCCGATCGAGCAACTGGCCGAGCAGTCCGATTATCTGGAAACCTGCTACCTGCTGCTCAATGGCGAACTGCCAACTGCCGAGCAGAAAGCCCAGTTCGTTGCCGTGGTCAAGAACCACACGATGGTTC…
168	CCE0182	FRA	Snowpack	KJ877944		Berge et al., 2014	TAATCGGACTGCTCGGCCAGTTGCTCGATCGGGTAGCCGCGGTGAAGCAGGATTCCGTTATCACCATCGATGCAGTTGATCATCGAGGGCGCTGCCCCCGTCGAGCTGCCAATTCTGACGGGTACAGTGGGTCCGGACGTGATCGACGTACGCGGTCTCACCGCCACCGGCCGCTTCACATTTGACCCTGGCTTCATGTCCACGGCATCTTGCGAGTCGAAGATCACCTACATCGATGGTGATAACGGAATCCTGCTTCACCGCGGCTACCCGATCGAGCAACTGGCCGAGCAGTCCGATTATCTGGAAACCTGCTACCTGCTGCTCAATGGCGAACTGCCAACTGCCGAGCAGAAAGCCCAGTTCGTTGCCGTGGTCAAGAACCACACGATGGTTCAC…
168	CCE0184	FRA	Snowpack	KJ877946		Berge et al., 2014	GACTGCTCGGCCAGTTGCTCGATCGGGTAGCCGCGGTGAAGCAGGATTCCGTTATCACCATCGATGGAGTTGATCATCGAGGGCGCTGCCCCCGTCGAGCTGCCAATTCTGACGGGTACAGTGGGTCCGGACGTGATCGACGTACGCGGTCTCACCGCCACCGGCCGCTTCACATTTGACCCTGGCTTCATGTCCACGGCATCTTGCGAGTCGAAGATCACCTACATCGATGGTGATAACGGAATCCTGCTTCACCGCGGCTACCCGATCGAGCAACTGGCCGAGCAGTCCGATTATCTGGAAACCTGCTACCTGCTGCTCAATGGCGAACTGCCAACTGCCGAGCAGAAAGCCCAGTTCGTTGCCGTGGTCAAGAACCACACGATGGTTCACGAACAG…
168	CCE0185	FRA	Snowpack	KJ877947		Berge et al., 2014	CTGCTCGGCCAGTTGCTCGATCGGGTAGCCGCGGTGAAGCAGGATTCCGTTATCACCATCGATGCAGTTGATCATCGAGGGCGCTGCCCCCGTCGAGCTGCCAATTCTGACGGGTACAGTGGGTCCGGACGTGATCGACGTACGCGGTCTCACCGCCACCGGCCGCTTCACATTTGACCCTGGCTTCATGTCCACGGCATCTTGCGAGTCGAAGATCACCTACATCGATGGTGATAACGGAATCCTGCTTCACCGCGGCTACCCGATCGAGCAACTGGCCGAGCAGTCCGATTATCTGGAAACCTGCTACCTGCTGCTCAATGGCGAACTGCCAACTGCCGAGCAGAAAGCCCAGTTCGTTGCCGTGGTCAAGAACCACACGATGGTTCACGAACAGCT…
168	CCE0186	FRA	Snowpack	KJ877948		Berge et al., 2014	GACTGCTCGGCCAGTTGCTCGATCGGGTAGCCGCGGTGAAGCAGGATTCCGTTATCACCATCGATGGAGTTGATCCATCGAGGGCGCTGCCCCCGTCGAGCTGCCAATTCTGACGGGTACAGTGGGTCCGGACGTGATCGACGTACGCGGTCTCACCGCCACCGGCCGCTTCACATTTGACCCTGGCTTCATGTCCACGGCATCTTGCGAGTCGAAGATCACCTACATCGATGGTGATAACGGAATCCTGCTTCACCGCGGCTACCCGATCGAGCAACTGGCCGAGCAGTCCGATTATCTGGAAACCTGCTACCTGCTGCTCAATGGCGAACTGCCAACTGCCGAGCAGAAAGCCCAGTTCGTTGCCGTGGTCAAGAACCACACGATGGTTCACGAACA…
168	CCE0187	FRA	Snowpack	KJ877949		Berge et al., 2014	TCGGACTGCTCGGCCAGTTGCTCGATCGGGTAGCCGCGGTGAAGCAGGATTCCGTTATCACCATCGATGGAGTTGATCCATCGAGGGCGCTGCCCCCGTCGAGCTGCCAATTCTGACGGGTACAGTGGGTCCGGACGTGATCGACGTACGCGGTCTCACCGCCACCGGCCGCTTCACATTTGACCCTGGCTTCATGTCCACGGCATCTTGCGAGTCGAAGATCACCTACATCGATGGTGATAACGGAATCCTGCTTCACCGCGGCTACCCGATCGAGCAACTGGCCGAGCAGTCCGATTATCTGGAAACCTGCTACCTGCTGCTCAATGGCGAACTGCCAACTGCCGAGCAGAAAGCCCAGTTCGTTGCCGTGGTCAAGAACCACACGATGGTTCACGA…
168	CCE0188	FRA	Snowpack	KJ877950		Berge et al., 2014	ATCGGACTGCTCGGCCAGTTGCTCGATCGGGTAGCCGCGGTGAAGCAGGATTCCGTTATCACCATCGATGGAGTTGATCCATCGAGGGCGCTGCCCCCGTCGAGCTGCCAATTCTGACGGGTACAGTGGGTCCGGACGTGATCGACGTACGCGGTCTCACCGCCACCGGCCGCTTCACATTTGACCCTGGCTTCATGTCCACGGCATCTTGCGAGTCGAAGATCACCTACATCGATGGTGATAACGGAATCCTGCTTCACCGCGGCTACCCGATCGAGCAACTGGCCGAGCAGTCCGATTATCTGGAAACCTGCTACCTGCTGCTCAATGGCGAACTGCCAACTGCCGAGCAGAAAGCCCAGTTCGTTGCCGTGGTCAAGAACCACACGATGGTTCACG…
168	CCE0190	FRA	Snowpack	KJ877952		Berge et al., 2014	TCCAGATAATCGGACTGCTCGGCCAGTTGCTCGATCGGGTAGCCGCGGTGAAGCAGGATTCCGTTATCACCATCGATGAAGTTGATCATCGAGGGCGCTGCCCCCGTCGAGCTGCCAATTCTGACGGGTACAGTGGGTCCGGACGTGATCGACGTACGCGGTCTCACCGCCACCGGCCGCTTCACATTTGACCCTGGCTTCATGTCCACGGCATCTTGCGAGTCGAAGATCACCTACATCGATGGTGATAACGGAATCCTGCTTCACCGCGGCTACCCGATCGAGCAACTGGCCGAGCAGTCCGATTATCTGGAAACCTGCTACCTGCTGCTCAATGGCGAACTGCCAACTGCCGAGCAGAAAGCCCAGTTCGTTGCCGTGGTCAAGAACCACACGATG…
168	CCE0191	FRA	Snowpack	KJ877953		Berge et al., 2014	TGCTCGATCGTGTAGCCGCGGTGAAGCAGGATTCCGTTATCACCATCGATGCAGTTGATCATCGAGGGCGCTGCCCCCGTCGAGCTGCCAATTCTGACGGGTACAGTGGGTCCGGACGTGATCGACGTACGCGGTCTCACCGCCACCGGCCGCTTCACATTTGACCCTGGCTTCATGTCCACGGCATCTTGCGAGTCGAAGATCACCTACATCGATGGTGATAACGGAATCCTGCTTCACCGCGGCTACCCGATCGAGCAACTGGCCGAGCAGTCCGATTATCTGGAAACCTGCTACCTGCTGCTCAATGGCGAACTGCCAACTGCCGAGCAGAAAGCCCAGTTCGTTGCCGTGGTCAAGAACCACACGATGGTTCACGAACAGCTCAAGACCTTTTTC…
168	CCE0192	FRA	Snowpack	KJ877954		Berge et al., 2014	CTGCTCGGCCAGTTGCTCGATCGGGTAGCCGCGGTGAAGCAGGATTCCGTTATCACCATCGATGTAGTTGATCATCGAGGGCGCTGCCCCCGTCGAGCTGCCAATTCTGACGGGTACAGTGGGTCCGGACGTGATCGACGTACGCGGTCTCACCGCCACCGGCCGCTTCACATTTGACCCTGGCTTCATGTCCACGGCATCTTGCGAGTCGAAGATCACCTACATCGATGGTGATAACGGAATCCTGCTTCACCGCGGCTACCCGATCGAGCAACTGGCCGAGCAGTCCGATTATCTGGAAACCTGCTACCTGCTGCTCAATGGCGAACTGCCAACTGCCGAGCAGAAAGCCCAGTTCGTTGCCGTGGTCAAGAACCACACGATGGTTCACGAACAGCT…
168	CCE0193	FRA	Snowpack	KJ877955		Berge et al., 2014	GACTGCTCGGCCAGTTGCTCGATCGGGTAGCCGCGGTGAAGCAGGATTCCGTTATCACCATCGATGCAGTTGATCATCGAGGGCGCTGCCCCCGTCGAGCTGCCAATTCTGACGGGTACAGTGGGTCCGGACGTGATCGACGTACGCGGTCTCACCGCCACCGGCCGCTTCACATTTGACCCTGGCTTCATGTCCACGGCATCTTGCGAGTCGAAGATCACCTACATCGATGGTGATAACGGAATCCTGCTTCACCGCGGCTACCCGATCGAGCAACTGGCCGAGCAGTCCGATTATCTGGAAACCTGCTACCTGCTGCTCAATGGCGAACTGCCAACTGCCGAGCAGAAAGCCCAGTTCGTTGCCGTGGTCAAGAACCACACGATGGTTCACGAACAG…
168	CCE0194	FRA	Snowpack	KJ877956		Berge et al., 2014	TCCAGATAATCGGACTGCTCGGCCAGTTGCTCGATCGGGTAGCCGCGGTGAAGCAGGATTCCGTTATCACCATCGATGGAGTTGATCATCGAGGGCGCTGCCCCCGTCGAGCTGCCAATTCTGACGGGTACAGTGGGTCCGGACGTGATCGACGTACGCGGTCTCACCGCCACCGGCCGCTTCACATTTGACCCTGGCTTCATGTCCACGGCATCTTGCGAGTCGAAGATCACCTACATCGATGGTGATAACGGAATCCTGCTTCACCGCGGCTACCCGATCGAGCAACTGGCCGAGCAGTCCGATTATCTGGAAACCTGCTACCTGCTGCTCAATGGCGAACTGCCAACTGCCGAGCAGAAAGCCCAGTTCGTTGCCGTGGTCAAGAACCACACGATG…
168	CCE0209	FRA	Freshwater	KJ877957		Berge et al., 2014	GCCCCCGTCGAGCTGCCAATTCTGACGGGTACAGTGGGTCCGGACGTGATCGACGTACGCGGTCTCACCGCCACCGGCCGCTTCACATTTGACCCTGGCTTCATGTCCACGGCATCTTGCGAGTCGAAGATCACCTACATCGATGGTGATAACGGAATCCTGCTTCACCGCGGCTACCCGATCGAGCAACTGGCCGAGCAGTCCGATTATCTGGAAACCTGCTACCTGCTGCTCAATGGCGAACTGCCAACTGCCGAGCAGAAAGCCCAGTTCGTTGCCGTGGTCAAGAACCACACGATGGTTCACGAACAGCTCAAGACCTTTTTCAACGGCTTCCGCCGTGATGCCCACCCGATGGCCGTCATGTGCGGCGTGGTCGGTGCCCTGTCGGCGTTCTAT…
168	CCE0221	FRA	Freshwater	KJ877961		Berge et al., 2014	GCCCCCGTCGAGCTGCCAATTCTGACGGGTACAGTGGGTCCGGACGTGATCGACGTACGCGGTCTCACCGCCACCGGCCGCTTCACATTTGACCCTGGCTTCATGTCCACGGCATCTTGCGAGTCGAAGATCACCTACATCGATGGTGATAACGGAATCCTGCTTCACCGCGGCTACCCGATCGAGCAACTGGCCGAGCAGTCCGATTATCTGGAAACCTGCTACCTGCTGCTCAATGGCGAACTGCCAACTGCCGAGCAGAAAGCCCAGTTCGTTGCCGTGGTCAAGAACCACACGATGGTTCACGAACAGCTCAAGACCTTTTTCAACGGCTTCCGCCGTGATGCCCACCCGATGGCCGTCATGTGCGGCGTGGTCGGTGCCCTGTCGGCGTTCTAT…
168	CCE0248	FRA	Freshwater	KJ877970		Berge et al., 2014	GCCCCCGTCGAGCTGCCAATTCTGACGGGTACAGTGGGTCCGGACGTGATCGACGTACGCGGTCTCACCGCCACCGGCCGCTTCACATTTGACCCTGGCTTCATGTCCACGGCATCTTGCGAGTCGAAGATCACCTACATCGATGGTGATAACGGAATCCTGCTTCACCGCGGCTACCCGATCGAGCAACTGGCCGAGCAGTCCGATTATCTGGAAACCTGCTACCTGCTGCTCAATGGCGAACTGCCAACTGCCGAGCAGAAAGCCCAGTTCGTTGCCGTGGTCAAGAACCACACGATGGTTCACGAACAGCTCAAGACCTTTTTCAACGGCTTCCGCCGTGATGCCCACCCGATGGCCGTCATGTGCGGCGTGGTCGGTGCCCTGTCGGCGTTCTAT…
168	CCE0278	FRA	Freshwater	KJ877971		Berge et al., 2014	GCCCCCGTCGAGCTGCCAATTCTGACGGGTACAGTGGGTCCGGACGTGATCGACGTACGCGGTCTCACCGCCACCGGCCGCTTCACATTTGACCCTGGCTTCATGTCCACGGCATCTTGCGAGTCGAAGATCACCTACATCGATGGTGATAACGGAATCCTGCTTCACCGCGGCTACCCGATCGAGCAACTGGCCGAGCAGTCCGATTATCTGGAAACCTGCTACCTGCTGCTCAATGGCGAACTGCCAACTGCCGAGCAGAAAGCCCAGTTCGTTGCCGTGGTCAAGAACCACACGATGGTTCACGAACAGCTCAAGACCTTTTTCAACGGCTTCCGCCGTGATGCCCACCCGATGGCCGTCATGTGCGGCGTGGTCGGTGCCCTGTCGGCGTTCTAT…
168	CCE0287	FRA	Freshwater	KJ877973		Berge et al., 2014	GCCCCCGTCGAGCTGCCAATTCTGACGGGTACAGTGGGTCCGGACGTGATCGACGTACGCGGTCTCACCGCCACCGGCCGCTTCACATTTGACCCTGGCTTCATGTCCACGGCATCTTGCGAGTCGAAGATCACCTACATCGATGGTGATAACGGAATCCTGCTTCACCGCGGCTACCCGATCGAGCAACTGGCCGAGCAGTCCGATTATCTGGAAACCTGCTACCTGCTGCTCAATGGCGAACTGCCAACTGCCGAGCAGAAAGCCCAGTTCGTTGCCGTGGTCAAGAACCACACGATGGTTCACGAACAGCTCAAGACCTTTTTCAACGGCTTCCGCCGTGATGCCCACCCGATGGCCGTCATGTGCGGCGTGGTCGGTGCCCTGTCGGCGTTCTAT…
168	CCE0655	FRA	Leaf_litter	KJ877998		Berge et al., 2014	TCGACGTACGCGGTCTCACCGCCACCGGCCGCTTCACATTTGACCCTGGCTTCATGTCCACGGCATCTTGCGAGTCGAAGATCACCTACATCGATGGTGATAACGGAATCCTGCTTCACCGCGGCTACCCGATCGAGCAACTGGCCGAGCAGTCCGATTATCTGGAAACCTGCTACCTGCTGCTCAATGGCGAACTGCCAACTGCCGAGCAGAAAGCCCAGTTCGTTGCCGTGGTCAAGAACCACACGATGGTTCACGAACAGCTCAAGACCTTTTTCAACGGCTTCCGCCGTGATGCCCACCCGATGGCCGTCATGTGCGGCGTGGTCGGTGCCCTGTCGGCGTTCTATCACGACTCGCTGGACATCAATAACCCGCAGCACCGCGAGATTTCTGCCG…
168	CCE0664	FRA	Leaf_litter	KJ878002		Berge et al., 2014	CGCTGCCCCCGTCGAGCTGCCAATTCTGACGGGTACAGTGGGTCCGGACGTGATCGACGTACGCGGTCTCACCGCCACCGGCCGCTTCACATTTGACCCTGGCTTCATGTCCACGGCATCTTGCGAGTCGAAGATCACCTACATCGATGGTGATAACGGAATCCTGCTTCACCGCGGCTACCCGATCGAGCAACTGGCCGAGCAGTCCGATTATCTGGAAACCTGCTACCTGCTGCTCAATGGCGAACTGCCAACTGCCGAGCAGAAAGCCCAGTTCGTTGCCGTGGTCAAGAACCACACGATGGTTCACGAACAGCTCAAGACCTTTTTCAACGGCTTCCGCCGTGATGCCCACCCGATGGCCGTCATGTGCGGCGTGGTCGGTGCCCTGTCGGCGTT…
168	CCE0727	FRA	Snowpack	KJ878012		Berge et al., 2014	TGATCGACGTACGCGGTCTCACCGCCACCGGCCGCTTCACATTTGACCCTGGCTTCATGTCCACGGCATCTTGCGAGTCGAAGATCACCTACATCGATGGTGATAACGGAATCCTGCTTCACCGCGGCTACCCGATCGAGCAACTGGCCGAGCAGTCCGATTATCTGGAAACCTGCTACCTGCTGCTCAATGGCGAACTGCCAACTGCCGAGCAGAAAGCCCAGTTCGTTGCCGTGGTCAAGAACCACACGATGGTTCACGAACAGCTCAAGACCTTTTTCAACGGCTTCCGCCGTGATGCCCACCCGATGGCCGTCATGTGCGGCGTGGTCGGTGCCCTGTCGGCGTTCTATCACGACTCGCTGGACATCAATAACCCGCAGCACCGCGAGATTTCTG…
168	CCE0728	FRA	Snowpack	KJ878013		Berge et al., 2014	GTCTCACCGCCACCGGCCGCTTCACATTTGACCCTGGCTTCATGTCCACGGCATCTTGCGAGTCGAAGATCACCTACATCGATGGTGATAACGGAATCCTGCTTCACCGCGGCTACCCGATCGAGCAACTGGCCGAGCAGTCCGATTATCTGGAAACCTGCTACCTGCTGCTCAATGGCGAACTGCCAACTGCCGAGCAGAAAGCCCAGTTCGTTGCCGTGGTCAAGAACCACACGATGGTTCACGAACAGCTCAAGACCTTTTTCAACGGCTTCCGCCGTGATGCCCACCCGATGGCCGTCATGTGCGGCGTGGTCGGTGCCCTGTCGGCGTTCTATCACGACTCGCTGGACATCAATAACCCGCAGCACCGCGAGATTTCTGCCGTGCGCCTGGTCG…
168	CCE0731	FRA	Snowpack	KJ878014		Berge et al., 2014	TGATCGACGTACGCGGTCTCACCGCCACCGGCCGCTTCACATTTGACCCTGGCTTCATGTCCACGGCATCTTGCGAGTCGAAGATCACCTACATCGATGGTGATAACGGAATCCTGCTTCACCGCGGCTACCCGATCGAGCAACTGGCCGAGCAGTCCGATTATCTGGAAACCTGCTACCTGCTGCTCAATGGCGAACTGCCAACTGCCGAGCAGAAAGCCCAGTTCGTTGCCGTGGTCAAGAACCACACGATGGTTCACGAACAGCTCAAGACCTTTTTCAACGGCTTCCGCCGTGATGCCCACCCGATGGCCGTCATGTGCGGCGTGGTCGGTGCCCTGTCGGCGTTCTATCACGACTCGCTGGACATCAATAACCCGCAGCACCGCGAGATTTCTG…
168	CCE0764	FRA	Snowpack	KJ878017		Berge et al., 2014	ATCGACGTACGCGGTCTCACCGCCACCGGCCGCTTCACATTTGACCCTGGCTTCATGTCCACGGCATCTTGCGAGTCGAAGATCACCTACATCGATGGTGATAACGGAATCCTGCTTCACCGCGGCTACCCGATCGAGCAACTGGCCGAGCAGTCCGATTATCTGGAAACCTGCTACCTGCTGCTCAATGGCGAACTGCCAACTGCCGAGCAGAAAGCCCAGTTCGTTGCCGTGGTCAAGAACCACACGATGGTTCACGAACAGCTCAAGACCTTTTTCAACGGCTTCCGCCGTGATGCCCACCCGATGGCCGTCATGTGCGGCGTGGTCGGTGCCCTGTCGGCGTTCTATCACGACTCGCTGGACATCAATAACCCGCAGCACCGCGAGATTTCTGCC…
168	CCE0909	FRA	Leaf_litter	KJ878027		Berge et al., 2014	GACGTACGCGGTCTCACCGCCACCGGCCGCTTCACATTTGACCCTGGCTTCATGTCCACGGCATCTTGCGAGTCGAAGATCACCTACATCGATGGTGATAACGGAATCCTGCTTCACCGCGGCTACCCGATCGAGCAACTGGCCGAGCAGTCCGATTATCTGGAAACCTGCTACCTGCTGCTCAATGGCGAACTGCCAACTGCCGAGCAGAAAGCCCAGTTCGTTGCCGTGGTCAAGAACCACACGATGGTTCACGAACAGCTCAAGACCTTTTTCAACGGCTTCCGCCGTGATGCCCACCCGATGGCCGTCATGTGCGGCGTGGTCGGTGCCCTGTCGGCGTTCTATCACGACTCGCTGGACATCAATAACCCGCAGCACCGCGAGATTTCTGCCGTG…
168	CCE0913	FRA	Leaf_litter	KJ878030		Berge et al., 2014	GACGTACGCGGTCTCACCGCCACCGGCCGCTTCACATTTGACCCTGGCTTCATGTCCACGGCATCTTGCGAGTCGAAGATCACCTACATCGATGGTGATAACGGAATCCTGCTTCACCGCGGCTACCCGATCGAGCAACTGGCCGAGCAGTCCGATTATCTGGAAACCTGCTACCTGCTGCTCAATGGCGAACTGCCAACTGCCGAGCAGAAAGCCCAGTTCGTTGCCGTGGTCAAGAACCACACGATGGTTCACGAACAGCTCAAGACCTTTTTCAACGGCTTCCGCCGTGATGCCCACCCGATGGCCGTCATGTGCGGCGTGGTCGGTGCCCTGTCGGCGTTCTATCACGACTCGCTGGACATCAATAACCCGCAGCACCGCGAGATTTCTGCCGTG…
168	CCV0094	FRA	Freshwater	KJ878050		Berge et al., 2014	GCCCCCGTCGAGCTGCCAATTCTGACGGGTACAGTGGGTCCGGACGTGATCGACGTACGCGGTCTCACCGCCACCGGCCGCTTCACATTTGACCCTGGCTTCATGTCCACGGCATCTTGCGAGTCGAAGATCACCTACATCGATGGTGATAACGGAATCCTGCTTCACCGCGGCTACCCGATCGAGCAACTGGCCGAGCAGTCCGATTATCTGGAAACCTGCTACCTGCTGCTCAATGGCGAACTGCCAACTGCCGAGCAGAAAGCCCAGTTCGTTGCCGTGGTCAAGAACCACACGATGGTTCACGAACAGCTCAAGACCTTTTTCAACGGCTTCCGCCGTGATGCCCACCCGATGGCCGTCATGTGCGGCGTGGTCGGTGCCCTGTCGGCGTTCTAT…
168	CCV0206	FRA	Freshwater	KJ878071		Berge et al., 2014	GCCCCCATCGAGCTGCCAATTCTGACGGGTACAGTGGGTCCGGACGTGATCGACGTACGCGGTCTCACCGCCACCGGCCGCTTCACATTTGACCCTGGCTTCATGTCCACGGCATCTTGCGAGTCGAAGATCACCTACATCGATGGTGATAACGGAATCCTGCTTCACCGCGGCTACCCGATCGAGCAACTGGCCGAGCAGTCCGATTATCTGGAAACCTGCTACCTGCTGCTCAATGGCGAACTGCCAACTGCCGAGCAGAAAGCCCAGTTCGTTGCCGTGGTCAAGAACCACACGATGGTTCACGAACAGCTCAAGACCTTTTTCAACGGCTTCCGCCGTGATGCCCACCCGATGGCCGTCATGTGCGGCGTGGTCGGTGCCCTGTCGGCGTTCTAT…
168	CEB0083	FRA	Biofilm	KJ878104		Berge et al., 2014	GGGCGCTGCCCCCGTCGAGCTGCCAATTCTGACGGGTACAGTGGGTCCGGACGTGATCGACGTACGCGGTCTCACCGCCACCGGCCGCTTCACATTTGACCCTGGCTTCATGTCCACGGCATCTTGCGAGTCGAAGATCACCTACATCGATGGTGATAACGGAATCCTGCTTCACCGCGGCTACCCGATCGAGCAACTGGCCGAGCAGTCCGATTATCTGGAAACCTGCTACCTGCTGCTCAATGGCGAACTGCCAACTGCCGAGCAGAAAGCCCAGTTCGTTGCCGTGGTCAAGAACCACACGATGGTTCACGAACAGCTCAAGACCTTTTTCAACGGCTTCCGCCGTGATGCCCACCCGATGGCCGTCATGTGCGGCGTGGTCGGTGCCCTGTCGGC…
168	CSZ0179	FRA	Freshwater	KJ878208		Berge et al., 2014	GCCCCCGTCGAGCTGCCAATTCTGACGGGTACAGTGGGTCCGGACGTGATCGACGTACGCGGTCTCACCGCCACCGGCCGCTTCACATTTGACCCTGGCTTCATGTCCACGGCATCTTGCGAGTCGAAGATCACCTACATCGATGGTGATAACGGAATCCTGCTTCACCGCGGCTACCCGATCGAGCAACTGGCCGAGCAGTCCGATTATCTGGAAACCTGCTACCTGCTGCTCAATGGCGAACTGCCAACTGCCGAGCAGAAAGCCCAGTTCGTTGCCGTGGTCAAGAACCACACGATGGTTCACGAACAGCTCAAGACCTTTTTCAACGGCTTCCGCCGTGATGCCCACCCGATGGCCGTCATGTGCGGCGTGGTCGGTGCCCTGTCGGCGTTCTAT…
168	CSZ0260	FRA	Freshwater	KJ878222		Berge et al., 2014	GCCCCCGTCGAGCTGCCAATTCTGACGGGTACAGTGGGTCCGGACGTGATCGACGTACGCGGTCTCACCGCCACCGGCCGCTTCACATTTGACCCTGGCTTCATGTCCACGGCATCTTGCGAGTCGAAGATCACCTACATCGATGGTGATAACGGAATCCTGCTTCACCGCGGCTACCCGATCGAGCAACTGGCCGAGCAGTCCGATTATCTGGAAACCTGCTACCTGCTGCTCAATGGCGAACTGCCAACTGCCGAGCAGAAAGCCCAGTTCGTTGCCGTGGTCAAGAACCACACGATGGTTCACGAACAGCTCAAGACCTTTTTCAACGGCTTCCGCCGTGATGCCCACCCGATGGCCGTCATGTGCGGCGTGGTCGGTGCCCTGTCGGCGTTCTAT…
168	CSZ0286	FRA	Snowpack	KJ878227		Berge et al., 2014	CCAGATAATGGACTGCTCGGCCAGTTGCTCGATCGGGTAGCCGCGGTGAAGCAGGATTCCGTTATCACCATCGATGTAGTTGATCATCGAGGGCGCTGCCCCCGTCGAGCTGCCAATTCTGACGGGTACAGTGGGTCCGGACGTGATCGACGTACGCGGTCTCACCGCCACCGGCCGCTTCACATTTGACCCTGGCTTCATGTCCACGGCATCTTGCGAGTCGAAGATCACCTACATCGATGGTGATAACGGAATCCTGCTTCACCGCGGCTACCCGATCGAGCAACTGGCCGAGCAGTCCGATTATCTGGAAACCTGCTACCTGCTGCTCAATGGCGAACTGCCAACTGCCGAGCAGAAAGCCCAGTTCGTTGCCGTGGTCAAGAACCACACGATGGT…
168	CSZ0293	FRA	Snowpack	KJ878234		Berge et al., 2014	GAGGGCGCTGCCCCCGTCGAGCTGCCAATTCTGACGGGTACAGTGGGTCCGGACGTGATCGACGTACGCGGTCTCACCGCCACCGGCCGCTTCACATTTGACCCTGGCTTCATGTCCACGGCATCTTGCGAGTCGAAGATCACCTACATCGATGGTGATAACGGAATCCTGCTTCACCGCGGCTACCCGATCGAGCAACTGGCCGAGCAGTCCGATTATCTGGAAACCTGCTACCTGCTGCTCAATGGCGAACTGCCAACTGCCGAGCAGAAAGCCCAGTTCGTTGCCGTGGTCAAGAACCACACGATGGTTCACGAACAGCTCAAGACCTTTTTCAACGGCTTCCGCCGTGATGCCCACCCGATGGCCGTCATGTGCGGCGTGGTCGGTGCCCTGTCG…
168	CSZ0296	FRA	Snowpack	KJ878235		Berge et al., 2014	GAGGGCGCTGCCCCCGTCGAGCTGCCAATTCTGACGGGTACAGTGGGTCCGGACGTGATCGACGTACGCGGTCTCACCGCCACCGGCCGCTTCACATTTGACCCTGGCTTCATGTCCACGGCATCTTGCGAGTCGAAGATCACCTACATCGATGGTGATAACGGAATCCTGCTTCACCGCGGCTACCCGATCGAGCAACTGGCCGAGCAGTCCGATTATCTGGAAACCTGCTACCTGCTGCTCAATGGCGAACTGCCAACTGCCGAGCAGAAAGCCCAGTTCGTTGCCGTGGTCAAGAACCACACGATGGTTCACGAACAGCTCAAGACCTTTTTCAACGGCTTCCGCCGTGATGCCCACCCGATGGCCGTCATGTGCGGCGTGGTCGGTGCCCTGTCG…
168	CSZ0298	FRA	Snowpack	KJ878237		Berge et al., 2014	GAGGGCGCTGCCCCCGTCGAGCTGCCAATTCTGACGGGTACAGTGGGTCCGGACGTGATCGACGTACGCGGTCTCACCGCCACCGGCCGCTTCACATTTGACCCTGGCTTCATGTCCACGGCATCTTGCGAGTCGAAGATCACCTACATCGATGGTGATAACGGAATCCTGCTTCACCGCGGCTACCCGATCGAGCAACTGGCCGAGCAGTCCGATTATCTGGAAACCTGCTACCTGCTGCTCAATGGCGAACTGCCAACTGCCGAGCAGAAAGCCCAGTTCGTTGCCGTGGTCAAGAACCACACGATGGTTCACGAACAGCTCAAGACCTTTTTCAACGGCTTCCGCCGTGATGCCCACCCGATGGCCGTCATGTGCGGCGTGGTCGGTGCCCTGTCG…
168	CSZ0315	FRA	Snowpack	KJ878239		Berge et al., 2014	GAGGGCGCTGCCCCCGTCGAGCTGCCAATTCTGACGGGTACAGTGGGTCCGGACGTGATCGACGTACGCGGTCTCACCGCCACCGGCCGCTTCACATTTGACCCTGGCTTCATGTCCACGGCATCTTGCGAGTCGAAGATCACCTACATCGATGGTGATAACGGAATCCTGCTTCACCGCGGCTACCCGATCGAGCAACTGGCCGAGCAGTCCGATTATCTGGAAACCTGCTACCTGCTGCTCAATGGCGAACTGCCAACTGCCGAGCAGAAAGCCCAGTTCGTTGCCGTGGTCAAGAACCACACGATGGTTCACGAACAGCTCAAGACCTTTTTCAACGGCTTCCGCCGTGATGCCCACCCGATGGCCGTCATGTGCGGCGTGGTCGGTGCCCTGTCG…
168	CSZ0316	FRA	Snowpack	KJ878240		Berge et al., 2014	GAGGGCGCTGCCCCCGTCGAGCTGCCAATTCTGACGGGTACAGTGGGTCCGGACGTGATCGACGTACGCGGTCTCACCGCCACCGGCCGCTTCACATTTGACCCTGGCTTCATGTCCACGGCATCTTGCGAGTCGAAGATCACCTACATCGATGGTGATAACGGAATCCTGCTTCACCGCGGCTACCCGATCGAGCAACTGGCCGAGCAGTCCGATTATCTGGAAACCTGCTACCTGCTGCTCAATGGCGAACTGCCAACTGCCGAGCAGAAAGCCCAGTTCGTTGCCGTGGTCAAGAACCACACGATGGTTCACGAACAGCTCAAGACCTTTTTCAACGGCTTCCGCCGTGATGCCCACCCGATGGCCGTCATGTGCGGCGTGGTCGGTGCCCTGTCG…
168	CSZ0321	FRA	Snowpack	KJ878245		Berge et al., 2014	GAGGGCGCTGCCCCCGTCGAGCTGCCAATTCTGACGGGTACAGTGGGTCCGGACGTGATCGACGTACGCGGTCTCACCGCCACCGGCCGCTTCACATTTGACCCTGGCTTCATGTCCACGGCATCTTGCGAGTCGAAGATCACCTACATCGATGGTGATAACGGAATCCTGCTTCACCGCGGCTACCCGATCGAGCAACTGGCCGAGCAGTCCGATTATCTGGAAACCTGCTACCTGCTGCTCAATGGCGAACTGCCAACTGCCGAGCAGAAAGCCCAGTTCGTTGCCGTGGTCAAGAACCACACGATGGTTCACGAACAGCTCAAGACCTTTTTCAACGGCTTCCGCCGTGATGCCCACCCGATGGCCGTCATGTGCGGCGTGGTCGGTGCCCTGTCG…
168	CSZ0329	FRA	Snowpack	KJ878253		Berge et al., 2014	GAGGGCGCTGCCCCCGTCGAGCTGCCAATTCTGACGGGTACAGTGGGTCCGGACGTGATCGACGTACGCGGTCTCACCGCCACCGGCCGCTTCACATTTGACCCTGGCTTCATGTCCACGGCATCTTGCGAGTCGAAGATCACCTACATCGATGGTGATAACGGAATCCTGCTTCACCGCGGCTACCCGATCGAGCAACTGGCCGAGCAGTCCGATTATCTGGAAACCTGCTACCTGCTGCTCAATGGCGAACTGCCAACTGCCGAGCAGAAAGCCCAGTTCGTTGCCGTGGTCAAGAACCACACGATGGTTCACGAACAGCTCAAGACCTTTTTCAACGGCTTCCGCCGTGATGCCCACCCGATGGCCGTCATGTGCGGCGTGGTCGGTGCCCTGTCG…
168	CSZ0338	FRA	Freshwater	KJ878255		Berge et al., 2014	GCCCCCGTCGAGCTGCCAATTCTGACGGGTACAGTGGGTCCGGACGTGATCGACGTACGCGGTCTCACCGCCACCGGCCGCTTCACATTTGACCCTGGCTTCATGTCCACGGCATCTTGCGAGTCGAAGATCACCTACATCGATGGTGATAACGGAATCCTGCTTCACCGCGGCTACCCGATCGAGCAACTGGCCGAGCAGTCCGATTATCTGGAAACCTGCTACCTGCTGCTCAATGGCGAACTGCCAACTGCCGAGCAGAAAGCCCAGTTCGTTGCCGTGGTCAAGAACCACACGATGGTTCACGAACAGCTCAAGACCTTTTTCAACGGCTTCCGCCGTGATGCCCACCCGATGGCCGTCATGTGCGGCGTGGTCGGTGCCCTGTCGGCGTTCTAT…
168	CSZ0382	FRA	Freshwater	KJ878262		Berge et al., 2014	GCCCCCGTCGAGCTGCCAATTCTGACGGGTACAGTGGGTCCGGACGTGATCGACGTACGCGGTCTCACCGCCACCGGCCGCTTCACATTTGACCCTGGCTTCATGTCCACGGCATCTTGCGAGTCGAAGATCACCTACATCGATGGTGATAACGGAATCCTGCTTCACCGCGGCTACCCGATCGAGCAACTGGCCGAGCAGTCCGATTATCTGGAAACCTGCTACCTGCTGCTCAATGGCGAACTGCCAACTGCCGAGCAGAAAGCCCAGTTCGTTGCCGTGGTCAAGAACCACACGATGGTTCACGAACAGCTCAAGACCTTTTTCAACGGCTTCCGCCGTGATGCCCACCCGATGGCCGTCATGTGCGGCGTGGTCGGTGCCCTGTCGGCGTTCTAT…
168	P7W0005	FRA	Groundwater	KJ878422		Berge et al., 2014	GAGGGCGCTGCCCCCGTCGAGCTGCCAATTCTGACGGGTACAGTGGGTCCGGACGTGATCGACGTACGCGGTCTCACCGCCACCGGCCGCTTCACATTTGACCCTGGCTTCATGTCCACGGCATCTTGCGAGTCGAAGATCACCTACATCGATGGTGATAACGGAATCCTGCTTCACCGCGGCTACCCGATCGAGCAACTGGCCGAGCAGTCCGATTATCTGGAAACCTGCTACCTGCTGCTCAATGGCGAACTGCCAACTGCCGAGCAGAAAGCCCAGTTCGTTGCCGTGGTCAAGAACCACACGATGGTTCACGAACAGCTCAAGACCTTTTTCAACGGCTTCCGCCGTGATGCCCACCCGATGGCCGTCATGTGCGGCGTGGTCGGTGCCCTGTCG…
168	SZ0123	FRA	Freshwater	KJ878454		Berge et al., 2014	GTGATCGACGTACGCGGTCTCACCGCCACCGGCCGCTTCACATTTGACCCTGGCTTCATGTCCACGGCATCTTGCGAGTCGAAGATCACCTACATCGATGGTGATAACGGAATCCTGCTTCACCGCGGCTACCCGATCGAGCAACTGGCCGAGCAGTCCGATTATCTGGAAACCTGCTACCTGCTGCTCAATGGCGAACTGCCAACTGCCGAGCAGAAAGCCCAGTTCGTTGCCGTGGTCAAGAACCACACGATGGTTCACGAACAGCTCAAGACCTTTTTCAACGGCTTCCGCCGTGATGCCCACCCGATGGCCGTCATGTGCGGCGTGGTCGGTGCCCTGTCGGCGTTCTATCACGACTCGCTGGACATCAATAACCCGCAGCACCGCGAGATTTCT…
168	SZB0001	FRA	Biofilm	KJ878461		Berge et al., 2014	GAGGGCGCTGCCCCCGTCGAGCTGCCAATTCTGACGGGTACAGTGGGTCCGGACGTGATCGACGTACGCGGTCTCACCGCCACCGGCCGCTTCACATTTGACCCTGGCTTCATGTCCACGGCATCTTGCGAGTCGAAGATCACCTACATCGATGGTGATAACGGAATCCTGCTTCACCGCGGCTACCCGATCGAGCAACTGGCCGAGCAGTCCGATTATCTGGAAACCTGCTACCTGCTGCTCAATGGCGAACTGCCAACTGCCGAGCAGAAAGCCCAGTTCGTTGCCGTGGTCAAGAACCACACGATGGTTCACGAACAGCTCAAGACCTTTTTCAACGGCTTCCGCCGTGATGCCCACCCGATGGCCGTCATGTGCGGCGTGGTCGGTGCCCTGTCG…
168	USA0046	USA	Freshwater	KJ878536		Berge et al., 2014	GATCGACGTACGCGGTCTCACCGCCACCGGCCGCTTCACATTTGACCCTGGCTTCATGTCCACGGCATCTTGCGAGTCGAAGATCACCTACATCGATGGTGATAACGGAATCCTGCTTCACCGCGGCTACCCGATCGAGCAACTGGCCGAGCAGTCCGATTATCTGGAAACCTGCTACCTGCTGCTCAATGGCGAACTGCCAACTGCCGAGCAGAAAGCCCAGTTCGTTGCCGTGGTCAAGAACCACACGATGGTTCACGAACAGCTCAAGACCTTTTTCAACGGCTTCCGCCGTGATGCCCACCCGATGGCCGTCATGTGCGGCGTGGTCGGTGCCCTGTCGGCGTTCTATCACGACTCGCTGGACATCAATAACCCGCAGCACCGCGAGATTTCTGC…
168	USA0102	USA	Freshwater	KJ878546		Berge et al., 2014	GTGATCGACGTACGCGGTCTCACCGCCACCGGCCGCTTCACATTTGACCCTGGCTTCATGTCCACGGCATCTTGCGAGTCGAAGATCACCTACATCGATGGTGATAACGGAATCCTGCTTCACCGCGGCTACCCGATCGAGCAACTGGCCGAGCAGTCCGATTATCTGGAAACCTGCTACCTGCTGCTCAATGGCGAACTGCCAACTGCCGAGCAGAAAGCCCAGTTCGTTGCCGTGGTCAAGAACCACACGATGGTTCACGAACAGCTCAAGACCTTTTTCAACGGCTTCCGCCGTGATGCCCACCCGATGGCCGTCATGTGCGGCGTGGTCGGTGCCCTGTCGGCGTTCTATCACGACTCGCTGGACATCAATAACCCGCAGCACCGCGAGATTTCT…
168	JFJ-0051	CHE	Snowfall	KY379261		Stopelli et al, 2017	CCCGTCGAGCTGCCAATACTGACCGGTACAGTGGGTCCGGACGTGATCGACGTACGCGGTCTGACCGCCACCGGCCGCTTCACATTTGACCCTGGTTTCATGTCCACGGCCTCTTGCGAGTCGAAGATCACCTACATCGATGGTGACAACGGAATTCTGCTGCACCGCGGCTACCCGATCGAACAACTGGCCGAGCAGTCCGATTATCTCGAGACCTGCTACCTGTTGCTCAACGGCGAGCTGCCAACCGCCGAACAGAAAGCCCAGTTCGTGGCCGTGGTCAAGAACCACACGATGGTTCACGAACAACTCAAGACCTTCTTCAACGGCTTTCGCCGTGACGCCCACCCGATGGCCGTCATGTGCGGTGTAGTCGGCGCCCTGTCGGCGTTCTACCAC…
168	JFJ-0053	CHE	Snowfall	KY379263		Stopelli et al, 2017	GCCCCCGTCGAGCTGCCAATACTGACCGGTACAGTGGGTCCGGACGTGATCGACGTACGCGGCCTGACCGCCACCGGCCGCTTCACATTTGACCCTGGCTTCATGTCCACGGCCTCTTGCGAGTCGAAGATCACCTACATTGATGGTGACAACGGAATTCTGCTGCACCGCGGCTACCCGATCGAACAACTGGCCGAGCAGTCCGATTACCTCGAGACCTGCTACCTGCTGCTCAACGGCGAGCTGCCAACCGCCGAACAGAAAGCCCAGTTCGTGGCCGTGGTCAAGAACCACACGATGGTTCACGAACAACTCAAGACCTTCTTCAACGGCTTTCGCCGTGACGCCCACCCGATGGCCGTCATGTGCGGTGTAGTTGGCGCCCTGTCGGCGTTCTAC…
169	241	ITA	Plant	KJ877793		Berge et al., 2014	GATCGACGTACGCGGTCTCACCGCCACCGGCCGCTTCACATTCGACCCTGGCTTCATGTCGACCGCCTCTTGCGAGTCGAAGATCACCTACATCGATGGTGACAACGGAATCCTGCTGCACCGCGGCTACCCTATCGAACAACTGGCCCAGCACTCCGACTACCTGGAGACCTGCTACCTGCTGCTCAATGGCGAATTGCCGACCGCCGAGCAGAAAGCCCAGTTCGTCGCCGTGGTCAAGAACCACACGATGGTCCACGAACAGCTCAAGACCTTTTTCAACGGCTTCCGTCGCGACGCCCACCCGATGGCCGTCATGTGCGGCGTGGTCGGCGCGCTTTCAGCGTTCTACCACGACTCGCTGGACATCAATAATCCGCAGCACCGCGAGATTTCCGC…
169	CAW0011	FRA	Groundwater	KJ877844		Berge et al., 2014	GGGCGCTGCCCCCGTCGAGCTGCCAATTCTGACCGGTACAGTGGGTCCGGACGTGATCGACGTACGCGGTCTCACCGCCACCGGCCGCTTCACATTCGACCCTGGCTTCATGTCGACCGCCTCTTGCGAGTCGAAGATCACCTACATCGATGGTGACAACGGAATCCTGCTGCACCGCGGCTACCCTATCGAACAACTGGCCCAGCACTCCGACTACCTGGAGACCTGCTACCTGCTGCTCAATGGCGAATTGCCGACCGCCGAGCAGAAAGCCCAGTTCGTCGCCGTGGTCAAGAACCACACGATGGTCCACGAACAGCTCAAGACCTTTTTCAACGGCTTCCGTCGCGACGCCCACCCGATGGCCGTCATGTGCGGCGTGGTCGGCGCGCTTTCAGC…
169	CC0657	FRA	Plant	KJ877860		Berge et al., 2014	AGTGATCGACGTACGCGGTCTCACCGCCACCGGCCGCTTCACATTCGACCCTGGCTTCATGTCGACCGCCTCTTGCGAGTCGAAGATCACCTACATCGATGGTGACAACGGAATCCTGCTGCACCGCGGCTACCCTATCGAACAACTGGCCCAGCACTCCGACTACCTGGAGACCTGCTACCTGCTGCTCAATGGCGAATTGCCGACCGCCGAGCAGAAAGCCCAGTTCGTCGCCGTGGTCAAGAACCACACGATGGTCCACGAACAGCTCAAGACCTTTTTCAACGGCTTCCGTCGCGACGCCCACCCGATGGCCGTCATGTGCGGCGTGGTCGGCGCGCTTTCAGCGTTCTACCACGACTCGCTGGACATCAATAATCCGCAGCACCGCGAGATTTC…
169	CC0663	FRA	Plant	KJ877864		Berge et al., 2014	CGTGATCGACGTACGCGGTCTCACCGCCACCGGCCGCTTCACATTCGACCCTGGCTTCATGTCGACCGCCTCTTGCGAGTCGAAGATCACCTACATCGATGGTGACAACGGAATCCTGCTGCACCGCGGCTACCCTATCGAACAACTGGCCCAGCACTCCGACTACCTGGAGACCTGCTACCTGCTGCTCAATGGCGAATTGCCGACCGCCGAGCAGAAAGCCCAGTTCGTCGCCGTGGTCAAGAACCACACGATGGTCCACGAACAGCTCAAGACCTTTTTCAACGGCTTCCGTCGCGACGCCCACCCGATGGCCGTCATGTGCGGCGTGGTCGGCGCGCTTTCAGCGTTCTACCACGACTCGCTGGACATCAATAATCCGCAGCACCGCGAGATTTC…
169	CC1486	FRA	Snowfall	KJ877887		Berge et al., 2014	GAGGGCGCTGCCCCCGTCGAGCTGCCAATTCTGACCGGTACAGTGGGTCCGGACGTGATCGACGTACGCGGTCTCACCGCCACCGGCCGCTTCACATTCGACCCTGGCTTCATGTCGACCGCCTCTTGCGAGTCGAAGATCACCTACATCGATGGTGACAACGGAATCCTGCTGCACCGCGGCTACCCTATCGAACAACTGGCCCAGCACTCCGACTACCTGGAGACCTGCTACCTGCTGCTCAATGGCGAATTGCCGACCGCCGAGCAGAAAGCCCAGTTCGTCGCCGTGGTCAAGAACCACACGATGGTCCACGAACAGCTCAAGACCTTTTTCAACGGCTTCCGTCGCGACGCCCACCCGATGGCCGTCATGTGCGGCGTGGTCGGCGCGCTTTCA…
169	CCE0322	FRA	Freshwater	KJ877977		Berge et al., 2014	GCCCCCGTCGAGCTGCCAATTCTGACCGGTACAGTGGGTCCGGACGTGATCGACGTACGCGGTCTCACCGCCACCGGCCGCTTCACATTCGACCCTGGCTTCATGTCGACCGCCTCTTGCGAGTCGAAGATCACCTACATCGATGGTGACAACGGAATCCTGCTGCACCGCGGCTACCCTATCGAACAACTGGCCCAGCACTCCGACTACCTGGAGACCTGCTACCTGCTGCTCAATGGCGAATTGCCGACCGCCGAGCAGAAAGCCCAGTTCGTCGCCGTGGTCAAGAACCACACGATGGTCCACGAACAGCTCAAGACCTTTTTCAACGGCTTCCGTCGCGACGCCCACCCGATGGCCGTCATGTGCGGCGTGGTCGGCGCGCTTTCAGCGTTCTAC…
169	CCE0324	FRA	Freshwater	KJ877978		Berge et al., 2014	GCCCCCGTCGAGCTGCCAATTCTGACCGGTACAGTGGGTCCGGACGTGATCGACGTACGCGGTCTCACCGCCACCGGCCGCTTCACATTCGACCCTGGCTTCATGTCGACCGCCTCTTGCGAGTCGAAGATCACCTACATCGATGGTGACAACGGAATCCTGCTGCACCGCGGCTACCCTATCGAACAACTGGCCCAGCACTCCGACTACCTGGAGACCTGCTACCTGCTGCTCAATGGCGAATTGCCGACCGCCGAGCAGAAAGCCCAGTTCGTCGCCGTGGTCAAGAACCACACGATGGTCCACGAACAGCTCAAGACCTTTTTCAACGGCTTCCGTCGCGACGCCCACCCGATGGCCGTCATGTGCGGCGTGGTCGGCGCGCTTTCAGCGTTCTAC…
169	CCE0327	FRA	Freshwater	KJ877979		Berge et al., 2014	GTCGAGCTGCCAATTCTGACCGGTACAGTGGGTCCGGACGTGATCGACGTACGCGGTCTCACCGCCACCGGCCGCTTCACATTCGACCCTGGCTTCATGTCGACCGCCTCTTGCGAGTCGAAGATCACCTACATCGATGGTGACAACGGAATCCTGCTGCACCGCGGCTACCCTATCGAACAACTGGCCCAGCACTCCGACTACCTGGAGACCTGCTACCTGCTGCTCAATGGCGAATTGCCGACCGCCGAGCAGAAAGCCCAGTTCGTCGCCGTGGTCAAGAACCACACGATGGTCCACGAACAGCTCAAGACCTTTTTCAACGGCTTCCGTCGCGACGCCCACCCGATGGCCGTCATGTGCGGCGTGGTCGGCGCGCTTTCAGCGTTCTACCACGAC…
169	CCV0050	FRA	Freshwater	KJ878041		Berge et al., 2014	GCCCCCGTCGAGCTGCCAATTCTGACCGGTACAGTGGGTCCGGACGTGATCGACGTACGCGGTCTCACCGCCACCGGCCGCTTCACATTCGACCCTGGCTTCATGTCGACCGCCTCTTGCGAGTCGAAGATCACCTACATCGATGGTGACAACGGAATCCTGCTGCACCGCGGCTACCCTATCGAACAACTGGCCCAGCACTCCGACTACCTGGAGACCTGCTACCTGCTGCTCAATGGCGAATTGCCGACCGCCGAGCAGAAAGCCCAGTTCGTCGCCGTGGTCAAGAACCACACGATGGTCCACGAACAGCTCAAGACCTTTTTCAACGGCTTCCGTCGCGACGCCCACCCGATGGCCGTCATGTGCGGCGTGGTCGGCGCGCTTTCAGCGTTCTAC…
169	CCV0188	FRA	Freshwater	KJ878069		Berge et al., 2014	GCCCCCGTCGAGCTGCCAATTCTGACCGGTACAGTGGGTCCGGACGTGATCGACGTACGCGGTCTCACCGCCACCGGCCGCTTCACATTCGACCCTGGCTTCATGTCGACCGCCTCTTGCGAGTCGAAGATCACCTACATCGATGGTGACAACGGAATCCTGCTGCACCGCGGCTACCCTATCGAACAACTGGCCCAGCACTCCGACTACCTGGAGACCTGCTACCTGCTGCTCAATGGCGAATTGCCGACCGCCGAGCAGAAAGCCCAGTTCGTCGCCGTGGTCAAGAACCACACGATGGTCCACGAACAGCTCAAGACCTTTTTCAACGGCTTCCGTCGCGACGCCCACCCGATGGCCGTCATGTGCGGCGTGGTCGGCGCGCTTTCAGCGTTCTAC…
169	CEB0010	FRA	Biofilm	KJ878096		Berge et al., 2014	GAGGGCGCTGCCCCCGTCGAGCTGCCAATTCTGACCGGTACAGTGGGTCCGGACGTGATCGACGTACGCGGTCTCACCGCCACCGGCCGCTTCACATTCGACCCTGGCTTCATGTCGACCGCCTCTTGCGAGTCGAAGATCACCTACATCGATGGTGACAACGGAATCCTGCTGCACCGCGGCTACCCTATCGAACAACTGGCCCAGCACTCCGACTACCTGGAGACCTGCTACCTGCTGCTCAATGGCGAATTGCCGACCGCCGAGCAGAAAGCCCAGTTCGTCGCCGTGGTCAAGAACCACACGATGGTCCACGAACAGCTCAAGACCTTTTTCAACGGCTTCCGTCGCGACGCCCACCCGATGGCCGTCATGTGCGGCGTGGTCGGCGCGCTTTCA…
169	CMA0031	MAR	Snowpack	KJ878141		Berge et al., 2014	GGGCGCTGCCCCCGTCGAGCTGCCAATTCTGACCGGTACAGTGGGTCCGGACGTGATCGACGTACGCGGTCTCACCGCCACCGGCCGCTTCACATTCGACCCTGGCTTCATGTCGACCGCCTCTTGCGAGTCGAAGATCACCTACATCGATGGTGACAACGGAATCCTGCTGCACCGCGGCTACCCTATCGAACAACTGGCCCAGCACTCCGACTACCTGGAGACCTGCTACCTGCTGCTCAATGGCGAATTGCCGACCGCCGAGCAGAAAGCCCAGTTCGTCGCCGTGGTCAAGAACCACACGATGGTCCACGAACAGCTCAAGACCTTTTTCAACGGCTTCCGTCGCGACGCCCACCCGATGGCCGTCATGTGCGGCGTGGTCGGCGCGCTTTCAGC…
169	CST0072	FRA	Rain	KJ878187		Berge et al., 2014	GAGGGCGCTGCCCCCGTCGAGCTGCCAATTCTGACCGGTACAGTGGGTCCGGACGTGATCGACGTACGCGGTCTCACCGCCACCGGCCGCTTCACATTCGACCCTGGCTTCATGTCGACCGCCTCTTGCGAGTCGAAGATCACCTACATCGATGGTGACAACGGAATCCTGCTGCACCGCGGCTACCCTATCGAACAACTGGCCCAGCACTCCGACTACCTGGAGACCTGCTACCTGCTGCTCAATGGCGAATTGCCGACCGCCGAGCAGAAAGCCCAGTTCGTCGCCGTGGTCAAGAACCACACGATGGTCCACGAACAGCTCAAGACCTTTTTCAACGGCTTCCGTCGCGACGCCCACCCGATGGCCGTCATGTGCGGCGTGGTCGGCGCGCTTTCA…
169	CSZ0283	FRA	Snowpack	KJ878224		Berge et al., 2014	GCAGGTCTCCAGGTAGTGGAGTGCTGGGCCAGTTGTTCGATAGGGTAGCCGCGGTGCAGCAGGATTCCGTTGTCACCATCGATGCTGTTGATCCACGAGGGCGCTGCCCCCGTCGAGCTGCCAATTCTGACCGGTACAGTGGGTCCGGACGTGATCGACGTACGCGGTCTCACCGCCACCGGCCGCTTCACATTCGACCCTGGCTTCATGTCGACCGCCTCTTGCGAGTCGAAGATCACCTACATCGATGGTGACAACGGAATCCTGCTGCACCGCGGCTACCCTATCGAACAACTGGCCCAGCACTCCGACTACCTGGAGACCTGCTACCTGCTGCTCAATGGCGAATTGCCGACCGCCGAGCAGAAAGCCCAGTTCGTCGCCGTGGTCAAGAACCAC…
169	CSZ0284	FRA	Snowpack	KJ878225		Berge et al., 2014	GCAGGTCTCCAGGTAGTGGAGTGCTGGGCCAGTTGTTCGATAGGGTAGCCGCGGTGCAGCAGGATTCCGTTGTCACCATCGATGAAGTTGATCCACGAGGGCGCTGCCCCCGTCGAGCTGCCAATTCTGACCGGTACAGTGGGTCCGGACGTGATCGACGTACGCGGTCTCACCGCCACCGGCCGCTTCACATTCGACCCTGGCTTCATGTCGACCGCCTCTTGCGAGTCGAAGATCACCTACATCGATGGTGACAACGGAATCCTGCTGCACCGCGGCTACCCTATCGAACAACTGGCCCAGCACTCCGACTACCTGGAGACCTGCTACCTGCTGCTCAATGGCGAATTGCCGACCGCCGAGCAGAAAGCCCAGTTCGTCGCCGTGGTCAAGAACCAC…
169	CSZ0297	FRA	Snowpack	KJ878236		Berge et al., 2014	GAGGGCGCTGCCCCCGTCGAGCTGCCAATTCTGACCGGTACAGTGGGTCCGGACGTGATCGACGTACGCGGTCTCACCGCCACCGGCCGCTTCACATTCGACCCTGGCTTCATGTCGACCGCCTCTTGCGAGTCGAAGATCACCTACATCGATGGTGACAACGGAATCCTGCTGCACCGCGGCTACCCTATCGAACAACTGGCCCAGCACTCCGACTACCTGGAGACCTGCTACCTGCTGCTCAATGGCGAATTGCCGACCGCCGAGCAGAAAGCCCAGTTCGTCGCCGTGGTCAAGAACCACACGATGGTCCACGAACAGCTCAAGACCTTTTTCAACGGCTTCCGTCGCGACGCCCACCCGATGGCCGTCATGTGCGGCGTGGTCGGCGCGCTTTCA…
169	CSZ0341	FRA	Freshwater	KJ878256		Berge et al., 2014	GCCCCCGTCGAGCTGCCAATTCTGACCGGTACAGTGGGTCCGGACGTGATCGACGTACGCGGTCTCACCGCCACCGGCCGCTTCACATTCGACCCTGGCTTCATGTCGACCGCCTCTTGCGAGTCGAAGATCACCTACATCGATGGTGACAACGGAATCCTGCTGCACCGCGGCTACCCTATCGAACAACTGGCCCAGCACTCCGACTACCTGGAGACCTGCTACCTGCTGCTCAATGGCGAATTGCCGACCGCCGAGCAGAAAGCCCAGTTCGTCGCCGTGGTCAAGAACCACACGATGGTCCACGAACAGCTCAAGACCTTTTTCAACGGCTTCCGTCGCGACGCCCACCCGATGGCCGTCATGTGCGGCGTGGTCGGCGCGCTTTCAGCGTTCTAC…
169	CSZ0342	FRA	Freshwater	KJ878257		Berge et al., 2014	GCCCCCGTCGAGCTGCCAATTCTGACCGGTACAGTGGGTCCGGACGTGATCGACGTACGCGGTCTCACCGCCACCGGCCGCTTCACATTCGACCCTGGCTTCATGTCGACCGCCTCTTGCGAGTCGAAGATCACCTACATCGATGGTGACAACGGAATCCTGCTGCACCGCGGCTACCCTATCGAACAACTGGCCCAGCACTCCGACTACCTGGAGACCTGCTACCTGCTGCTCAATGGCGAATTGCCGACCGCCGAGCAGAAAGCCCAGTTCGTCGCCGTGGTCAAGAACCACACGATGGTCCACGAACAGCTCAAGACCTTTTTCAACGGCTTCCGTCGCGACGCCCACCCGATGGCCGTCATGTGCGGCGTGGTCGGCGCGCTTTCAGCGTTCTAC…
169	CSZ0716	FRA	Snowpack	KJ878272		Berge et al., 2014	GGCGCTGCCCCCGTCGAGCTGCCAATTCTGACCGGTACAGTGGGTCCGGACGTGATCGACGTACGCGGTCTCACCGCCACCGGCCGCTTCACATTCGACCCTGGCTTCATGTCGACCGCCTCTTGCGAGTCGAAGATCACCTACATCGATGGTGACAACGGAATCCTGCTGCACCGCGGCTACCCTATCGAACAACTGGCCCAGCACTCCGACTACCTGGAGACCTGCTACCTGCTGCTCAATGGCGAATTGCCGACCGCCGAGCAGAAAGCCCAGTTCGTCGCCGTGGTCAAGAACCACACGATGGTCCACGAACAGCTCAAGACCTTTTTCAACGGCTTCCGTCGCGACGCCCACCCGATGGCCGTCATGTGCGGCGTGGTCGGCGCGCTTTCAGCG…
169	CSZ0836	FRA	Leaf_litter	KJ878280		Berge et al., 2014	GATCGACGTACGCGGTCTCACCGCCACCGGCCGCTTCACATTCGACCCTGGCTTCATGTCGACCGCCTCTTGCGAGTCGAAGATCACCTACATCGATGGTGACAACGGAATCCTGCTGCACCGCGGCTACCCTATCGAACAACTGGCCCAGCACTCCGACTACCTGGAGACCTGCTACCTGCTGCTCAATGGCGAATTGCCGACCGCCGAGCAGAAAGCCCAGTTCGTCGCCGTGGTCAAGAACCACACGATGGTCCACGAACAGCTCAAGACCTTTTTCAACGGCTTCCGTCGCGACGCCCACCCGATGGCCGTCATGTGCGGCGTGGTCGGCGCGCTTTCAGCGTTCTACCACGACTCGCTGGACATCAATAATCCGCAGCACCGCGAGATTTCCGC…
169	CSZ0847	FRA	Leaf_litter	KJ878283		Berge et al., 2014	TGATCGACGTACGCGGTCTCACCGCCACCGGCCGCTTCACATTCGACCCTGGCTTCATGTCGACCGCCTCTTGCGAGTCGAAGATCACCTACATCGATGGTGACAACGGAATCCTGCTGCACCGCGGCTACCCTATCGAACAACTGGCCCAGCACTCCGACTACCTGGAGACCTGCTACCTGCTGCTCAATGGCGAATTGCCGACCGCCGAGCAGAAAGCCCAGTTCGTCGCCGTGGTCAAGAACCACACGATGGTCCACGAACAGCTCAAGACCTTTTTCAACGGCTTCCGTCGCGACGCCCACCCGATGGCCGTCATGTGCGGCGTGGTCGGCGCGCTTTCAGCGTTCTACCACGACTCGCTGGACATCAATAATCCGCAGCACCGCGAGATTTCCG…
169	CSZ0855	FRA	Leaf_litter	KJ878285		Berge et al., 2014	TGATCGACGTACGCGGTCTCACCGCCACCGGCCGCTTCACATTCGACCCTGGCTTCATGTCGACCGCCTCTTGCGAGTCGAAGATCACCTACATCGATGGTGACAACGGAATCCTGCTGCACCGCGGCTACCCTATCGAACAACTGGCCCAGCACTCCGACTACCTGGAGACCTGCTACCTGCTGCTCAATGGCGAATTGCCGACCGCCGAGCAGAAAGCCCAGTTCGTCGCCGTGGTCAAGAACCACACGATGGTCCACGAACAGCTCAAGACCTTTTTCAACGGCTTCCGTCGCGACGCCCACCCGATGGCCGTCATGTGCGGCGTGGTCGGCGCGCTTTCAGCGTTCTACCACGACTCGCTGGACATCAATAATCCGCAGCACCGCGAGATTTCCG…
169	CSZ0905	FRA	Snowpack	KJ878291		Berge et al., 2014	GAGGGCGCTGCCCCCGTCGAGCTGCCAATTCTGACCGGTACAGTGGGTCCGGACGTGATCGACGTACGCGGTCTCACCGCCACCGGCCGCTTCACATTCGACCCTGGCTTCATGTCGACCGCCTCTTGCGAGTCGAAGATCACCTACATCGATGGTGACAACGGAATCCTGCTGCACCGCGGCTACCCTATCGAACAACTGGCCCAGCACTCCGACTACCTGGAGACCTGCTACCTGCTGCTCAATGGCGAATTGCCGACCGCCGAGCAGAAAGCCCAGTTCGTCGCCGTGGTCAAGAACCACACGATGGTCCACGAACAGCTCAAGACCTTTTTCAACGGCTTCCGTCGCGACGCCCACCCGATGGCCGTCATGTGCGGCGTGGTCGGCGCGCTTTCA…
169	LAB0001	FRA	Biofilm	KJ878373		Berge et al., 2014	GAGGGCGCTGCCCCCGTCGAGCTGCCAATTCTGACCGGTACAGTGGGTCCGGACGTGATCGACGTACGCGGTCTCACCGCCACCGGCCGCTTCACATTCGACCCTGGCTTCATGTCGACCGCCTCTTGCGAGTCGAAGATCACCTACATCGATGGTGACAACGGAATCCTGCTGCACCGCGGCTACCCTATCGAACAACTGGCCCAGCACTCCGACTACCTGGAGACCTGCTACCTGCTGCTCAATGGCGAATTGCCGACCGCCGAGCAGAAAGCCCAGTTCGTCGCCGTGGTCAAGAACCACACGATGGTCCACGAACAGCTCAAGACCTTTTTCAACGGCTTCCGTCGCGACGCCCACCCGATGGCCGTCATGTGCGGCGTGGTCGGCGCGCTTTCA…
169	LAB0124	FRA	Biofilm	KJ878393		Berge et al., 2014	GAGGGCGCTGCCCCCGTCGAGCTGCCAATTCTGACCGGTACAGTGGGTCCGGACGTGATCGACGTACGCGGTCTCACCGCCACCGGCCGCTTCACATTCGACCCTGGCTTCATGTCGACCGCCTCTTGCGAGTCGAAGATCACCTACATCGATGGTGACAACGGAATCCTGCTGCACCGCGGCTACCCTATCGAACAACTGGCCCAGCACTCCGACTACCTGGAGACCTGCTACCTGCTGCTCAATGGCGAATTGCCGACCGCCGAGCAGAAAGCCCAGTTCGTCGCCGTGGTCAAGAACCACACGATGGTCCACGAACAGCTCAAGACCTTTTTCAACGGCTTCCGTCGCGACGCCCACCCGATGGCCGTCATGTGCGGCGTGGTCGGCGCGCTTTCA…
169	LAB0126	FRA	Biofilm	KJ878394		Berge et al., 2014	GAGGGCGCTGCCCCCGTCGAGCTGCCAATTCTGACCGGTACAGTGGGTCCGGACGTGATCGACGTACGCGGTCTCACCGCCACCGGCCGCTTCACATTCGACCCTGGCTTCATGTCGACCGCCTCTTGCGAGTCGAAGATCACCTACATCGATGGTGACAACGGAATCCTGCTGCACCGCGGCTACCCTATCGAACAACTGGCCCAGCACTCCGACTACCTGGAGACCTGCTACCTGCTGCTCAATGGCGAATTGCCGACCGCCGAGCAGAAAGCCCAGTTCGTCGCCGTGGTCAAGAACCACACGATGGTCCACGAACAGCTCAAGACCTTTTTCAACGGCTTCCGTCGCGACGCCCACCCGATGGCCGTCATGTGCGGCGTGGTCGGCGCGCTTTCA…
169	LNW0018	FRA	Irrigation_water	KJ878405		Berge et al., 2014	GGGCGCTGCCCCCGTCGAGCTGCCAATTCTGACCGGTACAGTGGGTCCGGACGTGATCGACGTACGCGGCCTGACCGCCACCGGCCGCTTCACATTTGACCCTGGTTTCATGTCCACGGCGTCTTGCGATTCGAAGATCACCTACATCGATGGTGACAATGGCATCCTGCTGCACCGCGGCTACCCGATCGAACAACTGGCCGAGCAGTCCGACTACCTGGAAACCTGCTACCTGCTGCTCAACGGCGAACTGCCCACCGCCGAGCAGAAAGCCCAGTTCGTGGCCGTGGTCAAGAACCACACGATGGTTCACGAACAACTCAAGACCTTTTTCAACGGTTTCCGTCGCGACGCCCACCCGATGGCCGTCATGTGTGGCGTAGTCGGTGCCCTGTCAGC…
169	TA0002	FRA	Freshwater	KJ878488		Berge et al., 2014	GATCGACGTACGCGGTCTCACCGCCACCGGCCGCTTCACATTCGACCCTGGCTTCATGTCGACCGCCTCTTGCGAGTCGAAGATCACCTACATCGATGGTGACAACGGAATCCTGCTGCACCGCGGCTACCCTATCGAACAACTGGCCCAGCACTCCGACTACCTGGAGACCTGCTACCTGCTGCTCAATGGCGAATTGCCGACCGCCGAGCAGAAAGCCCAGTTCGTCGCCGTGGTCAAGAACCACACGATGGTCCACGAACAGCTCAAGACCTTTTTCAACGGCTTCCGTCGCGACGCCCACCCGATGGCCGTCATGTGCGGCGTGGTCGGCGCGCTTTCAGCGTTCTACCACGACTCGCTGGACATCAATAATCCGCAGCACCGCGAGATTTCCGC…
169	UB0259	FRA	Freshwater	KJ878513		Berge et al., 2014	GTGATCGACGTACGCGGTCTCACCGCCACCGGCCGCTTCACATTCGACCCTGGCTTCATGTCGACCGCCTCTTGCGAGTCGAAGATCACCTACATCGATGGTGACAACGGAATCCTGCTGCACCGCGGCTACCCTATCGAACAACTGGCCCAGCACTCCGACTACCTGGAGACCTGCTACCTGCTGCTCAATGGCGAATTGCCGACCGCCGAGCAGAAAGCCCAGTTCGTCGCCGTGGTCAAGAACCACACGATGGTCCACGAACAGCTCAAGACCTTTTTCAACGGCTTCCGTCGCGACGCCCACCCGATGGCCGTCATGTGCGGCGTGGTCGGCGCGCTTTCAGCGTTCTACCACGACTCGCTGGACATCAATAATCCGCAGCACCGCGAGATTTCC…
169	JFJ-0059	CHE	Snowfall	KY379269		Stopelli et al, 2017	GAGGGCGCTGCCCCCGTCGAGCTGCCAATTCTGACCGGTACAGTGGGTCCGGACGTGATCGACGTACGCGGCCTGACCGCCACCGGCCGCTTCACATTTGACCCTGGTTTCATGTCCACGGCCTCTTGCGATTCGAAGATCACCTACATCGATGGTGATAATGGCATTCTGCTACACCGCGGCTACCCGATCGAACAACTGGCCGAGCAGTCCGACTACCTCGAAACCTGCTACCTGCTGCTCAACGGTGAACTGCCCACCGCCGAGCAAAAAGCCCAGTTCGTGGCCGTGGTCAAGAACCACACGATGGTTCACGAACAGCTCAAGACCTTTTTCAACGGTTTCCGCCGCGACGCCCACCCGATGGCCGTCATGTGTGGCGTAGTCGGCGCCCTGTCA…
170	CEB0022	FRA	Biofilm	KJ878098		Berge et al., 2014	GAGGGCGCTGCCCCCGTCGAGCTGCCAATTCTGACCGGTACAGTGGGTCCGGACGTGATCGACGTACGCGGTCTCACCGCCACCGGCCGCTTCACATTCGACCCGGGCTTCATGTCGACCGCCTCTTGCGAGTCGAAGATCACCTACATCGATGGTGACAACGGAATCCTGCTGCACCGCGGCTACCCTATCGAACAACTGGCCCAGCACTCCGACTACCTGGAGACCTGCTACCTGCTGCTCAACGGCGAATTGCCGACCGCCGAGCAGAAAGCCCAGTTCGTCGCCGTGGTCAAGAACCACACGATGGTCCACGAACAGCTCAAGACCTTTTTCAACGGCTTCCGTCGCGACGCCCACCCGATGGCCGTTATGTGCGGCGTGGTCGGCGCGCTTTCA…
170	CEB0023	FRA	Biofilm	KJ878099		Berge et al., 2014	GGGCGCTGCCCCCGTCGAGCTGCCAATTCTGACCGGTACAGTGGGTCCGGACGTGATCGACGTACGCGGTCTCACCGCCACCGGCCGCTTCACATTCGACCCGGGCTTCATGTCGACCGCCTCTTGCGAGTCGAAGATCACCTACATCGATGGTGACAACGGAATCCTGCTGCACCGCGGCTACCCTATCGAACAACTGGCCCAGCACTCCGACTACCTGGAGACCTGCTACCTGCTGCTCAACGGCGAATTGCCGACCGCCGAGCAGAAAGCCCAGTTCGTCGCCGTGGTCAAGAACCACACGATGGTCCACGAACAGCTCAAGACCTTTTTCAACGGCTTCCGTCGCGACGCCCACCCGATGGCCGTTATGTGCGGCGTGGTCGGCGCGCTTTCAGC…
170	CEB0024	FRA	Biofilm	KJ878100		Berge et al., 2014	GAGGGCGCTGCCCCCGTCGAGCTGCCAATTCTGACCGGTACAGTGGGTCCGGACGTGATCGACGTACGCGGTCTCACCGCCACCGGCCGCTTCACATTCGACCCGGGCTTCATGTCGACCGCCTCTTGCGAGTCGAAGATCACCTACATCGATGGTGACAACGGAATCCTGCTGCACCGCGGCTACCCTATCGAACAACTGGCCCAGCACTCCGACTACCTGGAGACCTGCTACCTGCTGCTCAACGGCGAATTGCCGACCGCCGAGCAGAAAGCCCAGTTCGTCGCCGTGGTCAAGAACCACACGATGGTCCACGAACAGCTCAAGACCTTTTTCAACGGCTTCCGTCGCGACGCCCACCCGATGGCCGTTATGTGCGGCGTGGTCGGCGCGCTTTCA…
170	CEB0029	FRA	Biofilm	KJ878101		Berge et al., 2014	GAGGGCGCTGCCCCCGTCGAGCTGCCAATTCTGACCGGTACAGTGGGTCCGGACGTGATCGACGTACGCGGTCTCACCGCCACCGGCCGCTTCACATTCGACCCGGGCTTCATGTCGACCGCCTCTTGCGAGTCGAAGATCACCTACATCGATGGTGACAACGGAATCCTGCTGCACCGCGGCTACCCTATCGAACAACTGGCCCAGCACTCCGACTACCTGGAGACCTGCTACCTGCTGCTCAACGGCGAATTGCCGACCGCCGAGCAGAAAGCCCAGTTCGTCGCCGTGGTCAAGAACCACACGATGGTCCACGAACAGCTCAAGACCTTTTTCAACGGCTTCCGTCGCGACGCCCACCCGATGGCCGTTATGTGCGGCGTGGTCGGCGCGCTTTCA…
170	CEB0041	FRA	Biofilm	KJ878102		Berge et al., 2014	GAGGGCGCTGCCCCCGTCGAGCTGCCAATTCTGACCGGTACAGTGGGTCCGGACGTGATCGACGTACGCGGTCTCACCGCCACCGGCCGCTTCACATTCGACCCGGGCTTCATGTCGACCGCCTCTTGCGAGTCGAAGATCACCTACATCGATGGTGACAACGGAATCCTGCTGCACCGCGGCTACCCTATCGAACAACTGGCCCAGCACTCCGACTACCTGGAGACCTGCTACCTGCTGCTCAACGGCGAATTGCCGACCGCCGAGCAGAAAGCCCAGTTCGTCGCCGTGGTCAAGAACCACACGATGGTCCACGAACAGCTCAAGACCTTTTTCAACGGCTTCCGTCGCGACGCCCACCCGATGGCCGTTATGTGCGGCGTGGTCGGCGCGCTTTCA…
171	BS0004	ITA	Plant	KJ877842		Berge et al., 2014	TCCCGTCGAAGCTGCCAATATTGCTGACCGGTACAGTGGGTCCGGACGTGATCGACGTACGCGGCCTCACCGCCACCGGCCGCTTCACATTCGACCCTGGCTTCATGTCGACCGCCTCTTGCGAGTCGAAGATCACCTACATCGATGGTGACAACGGAATCCTGCTGCACCGCGGCTACCCTATCGAACAACTGGCCCAGCACTCCGACTACCTGGAGACCTGCTACCTGCTGCTCAACGGCGAATTGCCGACCGCCGAGCAGAAAGCCCAGTTCGTCGCCGTGGTCAAGAACCACACGATGGTCCACGAACAGCTCAAGACCTTTTTCAACGGCTTCCGTCGCGACGCCCACCCGATGGCCGTCATGTGCGGCGTGGTCGGCGCGCTTTCAGCGTTCT…
171	CC1492	FRA	Snowfall	KJ877890		Berge et al., 2014	GAGGGCGCTGCCCCCGTCGAGCTGCCAATTCTGACCGGTACAGTGGGTCCGGACGTGATCGACGTACGCGGTCTCACCGCCACCGGCCGCTTCACATTCGACCCTGGCTTCATGTCGACCGCCTCTTGCGAGTCGAAGATCACCTACATCGATGGTGACAACGGAATCCTGCTGCACCGCGGCTACCCTATCGAACAACTGGCCCAGCACTCCGACTACCTGGAGACCTGCTACCTGCTGCTCAACGGCGAATTGCCGACCGCCGAGCAGAAAGCCCAGTTCGTCGCCGTGGTCAAGAACCACACGATGGTCCACGAACAGCTCAAGACCTTTTTCAACGGCTTCCGTCGCGACGCCCACCCGATGGCCGTCATGTGCGGCGTGGTCGGCGCGCTTTCA…
171	CCV0172	FRA	Freshwater	KJ878065		Berge et al., 2014	GCCCCCGTCGAGCTGCCAATTCTGACCGGTACAGTGGGTCCGGACGTGATCGACGTACGCGGTCTCACCGCCACCGGCCGCTTCACATTCGACCCTGGCTTCATGTCGACCGCCTCTTGCGAGTCGAAGATCACCTACATCGATGGTGACAACGGAATCCTGCTGCACCGCGGCTACCCTATCGAACAACTGGCCCAGCACTCCGACTACCTGGAGACCTGCTACCTGCTGCTCAACGGCGAATTGCCGACCGCCGAGCAGAAAGCCCAGTTCGTCGCCGTGGTCAAGAACCACACGATGGTCCACGAACAGCTCAAGACCTTTTTCAACGGCTTCCGTCGCGACGCCCACCCGATGGCCGTCATGTGCGGCGTGGTCGGCGCGCTTTCAGCGTTCTAC…
171	CMW0005	FRA	Freshwater	KJ878160		Berge et al., 2014	GAGGGCGCTGCCCCCGTCGAGCTGCCAATTCTGACCGGTACAGTGGGTCCGGACGTGATCGACGTACGCGGTCTCACCGCCACCGGCCGCTTCACATTCGACCCTGGCTTCATGTCGACCGCCTCTTGCGAGTCGAAGATCACCTACATCGATGGTGACAACGGAATCCTGCTGCACCGCGGCTACCCTATCGAACAACTGGCCCAGCACTCCGACTACCTGGAGACCTGCTACCTGCTGCTCAACGGCGAATTGCCGACCGCCGAGCAGAAAGCCCAGTTCGTCGCCGTGGTCAAGAACCACACGATGGTCCACGAACAGCTCAAGACCTTTTTCAACGGCTTCCGTCGCGACGCCCACCCGATGGCCGTCATGTGCGGCGTGGTCGGCGCGCTTTCA…
171	CST0079	FRA	Rain	KJ878190		Berge et al., 2014	GGGCGCTGCCCCCGTCGAGCTGCCAATTCTGACCGGTACAGTGGGTCCGGACGTGATCGACGTACGCGGTCTCACCGCCACCGGCCGCTTCACATTCGACCCTGGCTTCATGTCGACCGCCTCTTGCGAGTCGAAGATCACCTACATCGATGGTGACAACGGAATCCTGCTGCACCGCGGCTACCCTATCGAACAACTGGCCCAGCACTCCGACTACCTGGAGACCTGCTACCTGCTGCTCAACGGCGAATTGCCGACCGCCGAGCAGAAAGCCCAGTTCGTCGCCGTGGTCAAGAACCACACGATGGTCCACGAACAGCTCAAGACCTTTTTCAACGGCTTCCGTCGCGACGCCCACCCGATGGCCGTCATGTGCGGCGTGGTCGGCGCGCTTTCAGC…
171	CSZ0285	FRA	Snowpack	KJ878226		Berge et al., 2014	GCAGGTCTCCAGGTAGTGGAGTGCTGGGCCAGTTGTTCGATAGGGTAGCCGCGGTGCAGCAGGATTCCGTTGTCACCATCGATGCAGTTGATCCATCGAGGGCGCTGCCCCCGTCGAGCTGCCAATTCTGACCGGTACAGTGGGTCCGGACGTGATCGACGTACGCGGTCTCACCGCCACCGGCCGCTTCACATTCGACCCTGGCTTCATGTCGACCGCCTCTTGCGAGTCGAAGATCACCTACATCGATGGTGACAACGGAATCCTGCTGCACCGCGGCTACCCTATCGAACAACTGGCCCAGCACTCCGACTACCTGGAGACCTGCTACCTGCTGCTCAACGGCGAATTGCCGACCGCCGAGCAGAAAGCCCAGTTCGTCGCCGTGGTCAAGAACCA…
171	LAB0162	FRA	Biofilm	KJ878399		Berge et al., 2014	GAGGGCGCTGCCCCCGTCGAGCTGCCAATTCTGACCGGTACAGTGGGTCCGGACGTGATCGACGTACGCGGTCTCACCGCCACCGGCCGCTTCACATTCGACCCTGGCTTCATGTCGACCGCCTCTTGCGAGTCGAAGATCACCTACATCGATGGTGACAACGGAATCCTGCTGCACCGCGGCTACCCTATCGAACAACTGGCCCAGCACTCCGACTACCTGGAGACCTGCTACCTGCTGCTCAACGGCGAATTGCCGACCGCCGAGCAGAAAGCCCAGTTCGTCGCCGTGGTCAAGAACCACACGATGGTCCACGAACAGCTCAAGACCTTTTTCAACGGCTTCCGTCGCGACGCCCACCCGATGGCCGTCATGTGCGGCGTGGTCGGCGCGCTTTCA…
171	TA0020	FRA	Freshwater	KJ878498		Berge et al., 2014	GATCGACGTACGCGGTCTCACCGCCACCGGCCGCTTCACATTCGACCCTGGCTTCATGTCGACCGCCTCTTGCGAGTCGAAGATCACCTACATCGATGGTGACAACGGAATCCTGCTGCACCGCGGCTACCCTATCGAACAACTGGCCCAGCACTCCGACTACCTGGAGACCTGCTACCTGCTGCTCAACGGCGAATTGCCGACCGCCGAGCAGAAAGCCCAGTTCGTCGCCGTGGTCAAGAACCACACGATGGTCCACGAACAGCTCAAGACCTTTTTCAACGGCTTCCGTCGCGACGCCCACCCGATGGCCGTCATGTGCGGCGTGGTCGGCGCGCTTTCAGCGTTTTACCACGACTCGCTGGACATCAATAATCCGCAGCACCGCGAGATTTCCGC…
171	TA0043	FRA	Plant	AVDV00000000		Berge et al., 2014	ATGGCTGACAAAAAAGCGCAGTTGATCATCGAGGGCGCTGCCCCCGTCGAGCTGCCAATTCTGACCGGTACAGTGGGTCCGGACGTGATCGACGTACGCGGTCTCACCGCCACCGGCCGCTTCACATTCGACCCTGGCTTCATGTCGACCGCCTCTTGCGAGTCGAAGATCACCTACATCGATGGTGACAACGGAATCCTGCTGCACCGCGGCTACCCTATCGAACAACTGGCCCAGCACTCCGACTACCTGGAGACCTGCTACCTGCTGCTCAACGGCGAATTGCCGACCGCCGAGCAGAAAGCCCAGTTCGTCGCCGTGGTCAAGAACCACACGATGGTCCACGAACAGCTCAAGACCTTTTTCAACGGCTTCCGTCGCGACGCCCACCCGATGGCC…
171	14B14	FRA	Cloud	NA		Joly et al, 2013	GGCGCTGCCCCCGTCGAGCTGCCAATTCTGACCGGTACAGTGGGTCCGGACGTGATCGACGTACGCGGCCTGACCGCCACCGGCCGCTTCACATTTGACCCTGGTTTCATGTCCACGGCGTCTTGCGATTCGAAGATCACCTACATCGATGGTGACAATGGCATTCTGCTGCACCGCGGCTACCCGATCGAACAACTGGCCGAGCAGTCCGACTACCTGGAAACCTGCTACCTGCTGCTCAACGGCGAACTGCCCACCGCCGAGCAGAAAGCCCAGTTCGTGGCCGTGGTCAAGAACCACACGATGGTTCACGAGCAACTCAAGACCTTTTTCAACGGTTTCCGTCGCGACGCCCACCCGATGGCCGTCATGTGTGGCGTAGTCGGTGCCCTGTCAGCG…
171	JFJ-0056	CHE	Snowfall	KY379266		Stopelli et al, 2017	GAGGGCGCTGCCCCCGTCGAGCTGCCAATTCTGACCGGTACAGTGGGTCCGGACGTGATCGACGTACGCGGCCTGACCGCCACCGGCCGCTTCACATTTGACCCTGGTTTCATGTCCACGGCCTCTTGCGATTCGAAGATCACCTACATCGATGGTGATAATGGCATTCTGCTACACCGCGGCTACCCGATCGAACAACTGGCCGAGCAGTCCGACTACCTCGAAACCTGCTACCTGCTGCTCAACGGTGAACTGCCCACCGCCGAGCAGAAAGCCCAGTTCGTGGCCGTGGTCAAGAACCACACGATGGTTCACGAACAGCTCAAGACTTTTTTCAACGGTTTCCGCCGCGACGCCCACCCGATGGCCGTCATGTGTGGCGTAGTCGGCGCCCTGTCA…
172	CMO0103	FRA	Rain	KJ878156		Berge et al., 2014	GAGGGCGCTGCCCCCGTCGAGCTGCCAATTCTGACCGGTACAGTGGGTCCGGACGTGATCGACGTACGCGGTCTCACCGCCACCGGCCGCTTCACATTCGACCCTGGCTTCATGTCGACCGCCTCTTGCGAGTCGAAGATCACCTACATCGATGGTGACAACGGAATCCTGCTGCACCGCGGCTACCCTATCGAACAACTGGCCCAGCACTCCGACTACCTGGAGACCTGCTACCTGCTGCTCAACGGCGAATTGCCGACCGCCGAGCAGAAAGCCCAGTTCGTCGCCGTGGTCAAGAACCACACGATGGTCCACGAACAGCTCAAGACCTTTTTCAACGGCTTCCGTCGCGACGCCCACCCGATGGCCGTCATGTGCGGCGTGGTCGGTGCGCTTTCA…
172	JT6	ITA	Plant	KJ878370		Berge et al., 2014	TCCCGTCGAAGCTGCCAATATTGCTGACCGGTACAGTGGGTCCGGACGTGATCGACGTACGCGGTCTCACCGCCACCGGCCGCTTCACATTCGACCCTGGCTTCATGTCGACCGCCTCTTGCGAGTCGAAGATCACCTACATCGATGGTGACAACGGAATCCTGCTGCACCGCGGCTACCCTATCGAACAACTGGCCCAGCACTCCGACTACCTGGAGACCTGCTACCTGCTGCTCAACGGCGAATTGCCGACCGCCGAGCAGAAAGCCCAGTTCGTCGCCGTGGTCAAGAACCACACGATGGTCCACGAACAGCTCAAGACCTTTTTCAACGGCTTCCGTCGCGACGCCCACCCGATGGCCGTCATGTGCGGCGTGGTCGGTGCGCTTTCAGCGTTCT…
173	LYR0045	FRA	Rain	KJ878420		Berge et al., 2014	GAGGGCGCTGCCCCCGTCGAGCTGCCAATTCTGACCGGTACAGTGGGTCCGGACGTGATCGACGTACGCGGTCTCACCGCCACCGGCCGCTTCACATTCGACCCTGGCTTCATGTCGACCGCCTCTTGCGAGTCGAAGATCACCTACATCGATGGTGACAACGGAATCCTGCTGCACCGCGGCTACCCTATCGAACAACTGGCCCAGCACTCCGACTACCTGGAGACCTGCTACCTGCTGCTCAACGGCGAATTGCCGACCGCCGAGCAGAAAGCCCAGTTCGTCGCCGTGGTCAAGAACCACACGATGGTCCACGAACAGCTCAAGACCTTTTTCAACGGCTTCCGTCGCGACGCCCACCCGATGGCCGTCATGTGCGGAGTGGTCGGCGCGCTTTCA…
173	UASWS0038	CHE	Plant	NZ_AMQP00000000		Berge et al., 2014	CACCGGCCGCTTCACATTCGACCCTGGCTTCATGTCGACCGCCTCTTGCGAGTCGAAGATCACCTACATCGATGGTGACAACGGAATCCTGCTGCACCGCGGCTACCCTATCGAACAACTGGCCCAGCACTCCGACTACCTGGAGACCTGCTACCTGCTGCTCAACGGCGAATTGCCGACCGCCGAGCAGAAAGCCCAGTTCGTCGCCGTGGTCAAGAACCACACGATGGTCCACGAACAGCTCAAGACCTTTTTCAACGGCTTCCGTCGCGACGCCCACCCGATGGCCGTCATGTGCGGAGTGGTCGGCGCGCTTTCAGCGTTCTACCACGACTCGCTGGACATCAATAATCCGCAGCACCGCGAGATTTCCGCCGTACGCCTGGTCGCCAAGATGCC…
173	CFBP2107	CHE	Plant	KF937498		https://cirm-cfbp.fr/	ATGGCTGACAAAAAAGCGCAGTTGATCATCGAGGGCGCTGCCCCCGTCGAGCTGCCAATTCTGACCGGTACAGTGGGTCCGGACGTGATCGACGTACGCGGTCTCACCGCCACCGGCCGCTTCACATTCGACCCTGGCTTCATGTCGACCGCCTCTTGCGAGTCGAAGATCACCTACATCGATGGTGACAACGGAATCCTGCTGCACCGCGGCTACCCTATCGAACAACTGGCCCAGCACTCCGACTACCTGGAGACCTGCTACCTGCTGCTCAACGGCGAATTGCCGACCGCCGAGCAGAAAGCCCAGTTCGTCGCCGTGGTCAAGAACCACACGATGGTCCACGAACAGCTCAAGACCTTTTTCAACGGCTTCCGTCGCGACGCCCACCCGATGGCC…
174	CCE0284	FRA	Freshwater	KJ877972		Berge et al., 2014	GCCCCCGTCGAGCTGCCAATTCTGACCGGTACAGTGGGTCCGGACGTGATCGACGTACGCGGTCTCACCGCCACCGGCCGCTTCACATTCGACCCTGGCTTTATGTCGACCGCCTCTTGCGAGTCGAAGATCACCTACATCGATGGTGACAACGGAATCCTGCTGCACCGCGGCTACCCTATCGAACAACTGGCCCAGCATTCCGACTACCTGGAGACCTGCTACCTGCTGCTCAACGGCGAATTGCCGACCGCCGAGCAGAAAGCCCAGTTCGTCGCCGTGGTCAAGAACCACACGATGGTCCACGAACAGCTCAAGACCTTTTTCAACGGCTTCCGTCGCGACGCCCACCCGATGGCCGTCATGTGCGGAGTGGTCGGCGCGCTTTCAGCGTTCTAC…
174	CCE0291	FRA	Freshwater	KJ877975		Berge et al., 2014	GCCCCCGTCGAGCTGCCAATTCTGACCGGTACAGTGGGTCCGGACGTGATCGACGTACGCGGTCTCACCGCCACCGGCCGCTTCACATTCGACCCTGGCTTTATGTCGACCGCCTCTTGCGAGTCGAAGATCACCTACATCGATGGTGACAACGGAATCCTGCTGCACCGCGGCTACCCTATCGAACAACTGGCCCAGCATTCCGACTACCTGGAGACCTGCTACCTGCTGCTCAACGGCGAATTGCCGACCGCCGAGCAGAAAGCCCAGTTCGTCGCCGTGGTCAAGAACCACACGATGGTCCACGAACAGCTCAAGACCTTTTTCAACGGCTTCCGTCGCGACGCCCACCCGATGGCCGTCATGTGCGGAGTGGTCGGCGCGCTTTCAGCGTTCTAC…
174	CCE0316	FRA	Freshwater	KJ877976		Berge et al., 2014	GCCCCCGTCGAGCTGCCAATTCTGACCGGTACAGTGGGTCCGGACGTGATCGACGTACGCGGTCTCACCGCCACCGGCCGCTTCACATTCGACCCTGGCTTTATGTCGACCGCCTCTTGCGAGTCGAAGATCACCTACATCGATGGTGACAACGGAATCCTGCTGCACCGCGGCTACCCTATCGAACAACTGGCCCAGCATTCCGACTACCTGGAGACCTGCTACCTGCTGCTCAACGGCGAATTGCCGACCGCCGAGCAGAAAGCCCAGTTCGTCGCCGTGGTCAAGAACCACACGATGGTCCACGAACAGCTCAAGACCTTTTTCAACGGCTTCCGTCGCGACGCCCACCCGATGGCCGTCATGTGCGGAGTGGTCGGCGCGCTTTCAGCGTTCTAC…
174	CCE0328	FRA	Freshwater	KJ877980		Berge et al., 2014	GCCCCCGTCGAGCTGCCAATTCTGACCGGTACAGTGGGTCCGGACGTGATCGACGTACGCGGTCTCACCGCCACCGGCCGCTTCACATTCGACCCTGGCTTTATGTCGACCGCCTCTTGCGAGTCGAAGATCACCTACATCGATGGTGACAACGGAATCCTGCTGCACCGCGGCTACCCTATCGAACAACTGGCCCAGCATTCCGACTACCTGGAGACCTGCTACCTGCTGCTCAACGGCGAATTGCCGACCGCCGAGCAGAAAGCCCAGTTCGTCGCCGTGGTCAAGAACCACACGATGGTCCACGAACAGCTCAAGACCTTTTTCAACGGCTTCCGTCGCGACGCCCACCCGATGGCCGTCATGTGCGGAGTGGTCGGCGCGCTTTCAGCGTTCTAC…
174	CEB0085	FRA	Biofilm	KJ878105		Berge et al., 2014	GAGGGCGCTGCCCCCGTCGAGCTGCCAATTCTGACCGGTACAGTGGGTCCGGACGTGATCGACGTACGCGGTCTCACCGCCACCGGCCGCTTCACATTCGACCCTGGCTTTATGTCGACCGCCTCTTGCGAGTCGAAGATCACCTACATCGATGGTGACAACGGAATCCTGCTGCACCGCGGCTACCCTATCGAACAACTGGCCCAGCATTCCGACTACCTGGAGACCTGCTACCTGCTGCTCAACGGCGAATTGCCGACCGCCGAGCAGAAAGCCCAGTTCGTCGCCGTGGTCAAGAACCACACGATGGTCCACGAACAGCTCAAGACCTTTTTCAACGGCTTCCGTCGCGACGCCCACCCGATGGCCGTCATGTGCGGAGTGGTCGGCGCGCTTTCA…
175	BS0002	ITA	Plant	KJ877841		Berge et al., 2014	GCCCCCGTCGAGCTGCCAATTCTGACCGGTACAGTGGGTCCGGACGTGATCGACGTACGTGGTCTCACCGCCACCGGCCGCTTCACATTCGACCCGGGCTTCATGTCGACCGCCTCTTGCGAGTCGAAGATCACCTACATCGATGGTGACAACGGAATCCTGCTGCACCGCGGCTACCCTATCGAACAACTGGCCCAGCACTCCGACTACCTGGAGACCTGCTACCTGCTGCTCAACGGCGAATTGCCGACCGCCGAGCAGAAAGCCCAGTTCGTCGCCGTGGTCAAGAACCACACGATGGTCCACGAACAGCTCAAGACCTTTTTCAACGGCTTCCGTCGCGACGCCCACCCGATGGCCGTCATGTGCGGCGTGGTCGGCGCCCTTTCAGCGTTCTAC…
175	BS0005	ITA	Plant	KJ877843		Berge et al., 2014	AGGGCGCTGCCCCCGTCGAGCTGCCAATTCTGACCGGTACAGTGGGTCCGGACGTGATCGACGTACGTGGTCTCACCGCCACCGGCCGCTTCACATTCGACCCGGGCTTCATGTCGACCGCCTCTTGCGAGTCGAAGATCACCTACATCGATGGTGACAACGGAATCCTGCTGCACCGCGGCTACCCTATCGAACAACTGGCCCAGCACTCCGACTACCTGGAGACCTGCTACCTGCTGCTCAACGGCGAATTGCCGACCGCCGAGCAGAAAGCCCAGTTCGTCGCCGTGGTCAAGAACCACACGATGGTCCACGAACAGCTCAAGACCTTTTTCAACGGCTTCCGTCGCGACGCCCACCCGATGGCCGTCATGTGCGGCGTGGTCGGCGCCCTTTCAG…
175	PVCT26.1.1	ITA	Plant	KJ878429		Berge et al., 2014	TCCCGTCGAAGCTGCCAATATTGCTGACCGGTACAGTGGGTCCGGACGTGATCGACGTACGTGGTCTCACCGCCACCGGCCGCTTCACATTCGACCCGGGCTTCATGTCGACCGCCTCTTGCGAGTCGAAGATCACCTACATCGATGGTGACAACGGAATCCTGCTGCACCGCGGCTACCCTATCGAACAACTGGCCCAGCACTCCGACTACCTGGAGACCTGCTACCTGCTGCTCAACGGCGAATTGCCGACCGCCGAGCAGAAAGCCCAGTTCGTCGCCGTGGTCAAGAACCACACGATGGTCCACGAACAGCTCAAGACCTTTTTCAACGGCTTCCGTCGCGACGCCCACCCGATGGCCGTCATGTGCGGCGTGGTCGGCGCCCTTTCAGCGTTCT…
175	PVCT26.3.1	ITA	Plant	KJ878430		Berge et al., 2014	TCCCGTCGAAGCTGCCAATATTGCTGACCGGTACAGTGGGTCCGGACGTGATCGACGTACGTGGTCTCACCGCCACCGGCCGCTTCACATTCGACCCGGGCTTCATGTCGACCGCCTCTTGCGAGTCGAAGATCACCTACATCGATGGTGACAACGGAATCCTGCTGCACCGCGGCTACCCTATCGAACAACTGGCCCAGCACTCCGACTACCTGGAGACCTGCTACCTGCTGCTCAACGGCGAATTGCCGACCGCCGAGCAGAAAGCCCAGTTCGTCGCCGTGGTCAAGAACCACACGATGGTCCACGAACAGCTCAAGACCTTTTTCAACGGCTTCCGTCGCGACGCCCACCCGATGGCCGTCATGTGCGGCGTGGTCGGCGCCCTTTCAGCGTTCT…
176	CC0661	FRA	Plant	KJ877863		Berge et al., 2014	CGTGATCGACGTACGCGGTCTCACCGCCACCGGCCGCTTCACATTCGACCCTGGCTTCATGTCGACCGCCTCTTGCGAGTCGAAGATCACCTACATCGATGGTGACAACGGAATCCTGCTGCACCGCGGCTACCCTATCGAACAACTGGCCCAGCACTCCGACTACCTGGAGACCTGCTACCTGCTGCTCAACGGTGAATTGCCAACCGCCGAGCAGAAAGCCCAGTTCGTCGCCGTGGTCAAGAACCACACGATGGTCCACGAACAGCTCAAGACCTTTTTCAACGGCTTCCGTCGCGACGCCCACCCGATGGCCGTCATGTGCGGCGTGGTCGGCGCGCTTTCAGCGTTCTACCACGACTCGCTGGACATCAATAATCCGCAGCACCGCGAGATTTC…
176	CC1582	FRA	Biofilm	AVDW00000000		Berge et al., 2014	ATGGCTGACAAAAAAGCGCAGTTGATCATCGAGGGCGCTGCCCCCGTCGAGCTGCCAATTCTGACCGGTACAGTGGGTCCGGACGTGATCGACGTACGCGGTCTCACCGCCACCGGCCGCTTCACATTCGACCCTGGCTTCATGTCGACCGCCTCTTGCGAGTCGAAGATCACCTACATCGATGGTGACAACGGAATCCTGCTGCACCGCGGCTACCCTATCGAACAACTGGCCCAGCACTCCGACTACCTGGAGACCTGCTACCTGCTGCTCAACGGTGAATTGCCAACCGCCGAGCAGAAAGCCCAGTTCGTCGCCGTGGTCAAGAACCACACGATGGTCCACGAACAGCTCAAGACCTTTTTCAACGGCTTCCGTCGCGACGCCCACCCGATGGCC…
176	CCV0142	FRA	Freshwater	KJ878062		Berge et al., 2014	GCCCCCGTCGAGCTGCCAATTCTGACCGGTACAGTGGGTCCGGACGTGATCGACGTACGCGGTCTCACCGCCACCGGCCGCTTCACATTCGACCCTGGCTTCATGTCGACCGCCTCTTGCGAGTCGAAGATCACCTACATCGATGGTGACAACGGAATCCTGCTGCACCGCGGCTACCCTATCGAACAACTGGCCCAGCACTCCGACTACCTGGAGACCTGCTACCTGCTGCTCAACGGTGAATTGCCAACCGCCGAGCAGAAAGCCCAGTTCGTCGCCGTGGTCAAGAACCACACGATGGTCCACGAACAGCTCAAGACCTTTTTCAACGGCTTCCGTCGCGACGCCCACCCGATGGCCGTCATGTGCGGCGTGGTCGGCGCGCTTTCAGCGTTCTAC…
176	CCV0178	FRA	Freshwater	KJ878067		Berge et al., 2014	GCCCCCGTCGAGCTGCCAATTCTGACCGGTACAGTGGGTCCGGACGTGATCGACGTACGCGGTCTCACCGCCACCGGCCGCTTCACATTCGACCCTGGCTTCATGTCGACCGCCTCTTGCGAGTCGAAGATCACCTACATCGATGGTGACAACGGAATCCTGCTGCACCGCGGCTACCCTATCGAACAACTGGCCCAGCACTCCGACTACCTGGAGACCTGCTACCTGCTGCTCAACGGTGAATTGCCAACCGCCGAGCAGAAAGCCCAGTTCGTCGCCGTGGTCAAGAACCACACGATGGTCCACGAACAGCTCAAGACCTTTTTCAACGGCTTCCGTCGCGACGCCCACCCGATGGCCGTCATGTGCGGCGTGGTCGGCGCGCTTTCAGCGTTCTAC…
176	CCV0180	FRA	Freshwater	KJ878068		Berge et al., 2014	GCCCCCGTCGAGCTGCCAATTCTGACCGGTACAGTGGGTCCGGACGTGATCGACGTACGCGGTCTCACCGCCACCGGCCGCTTCACATTCGACCCTGGCTTCATGTCGACCGCCTCTTGCGAGTCGAAGATCACCTACATCGATGGTGACAACGGAATCCTGCTGCACCGCGGCTACCCTATCGAACAACTGGCCCAGCACTCCGACTACCTGGAGACCTGCTACCTGCTGCTCAACGGTGAATTGCCAACCGCCGAGCAGAAAGCCCAGTTCGTCGCCGTGGTCAAGAACCACACGATGGTCCACGAACAGCTCAAGACCTTTTTCAACGGCTTCCGTCGCGACGCCCACCCGATGGCCGTCATGTGCGGCGTGGTCGGCGCGCTTTCAGCGTTCTAC…
176	LAB0006	FRA	Biofilm	KJ878376		Berge et al., 2014	GAGGGCGCTGCCCCCGTCGAGCTGCCAATTCTGACCGGTACAGTGGGTCCGGACGTGATCGACGTACGCGGTCTCACCGCCACCGGCCGCTTCACATTCGACCCTGGCTTCATGTCGACCGCCTCTTGCGAGTCGAAGATCACCTACATCGATGGTGACAACGGAATCCTGCTGCACCGCGGCTACCCTATCGAACAACTGGCCCAGCACTCCGACTACCTGGAGACCTGCTACCTGCTGCTCAACGGTGAATTGCCAACCGCCGAGCAGAAAGCCCAGTTCGTCGCCGTGGTCAAGAACCACACGATGGTCCACGAACAGCTCAAGACCTTTTTCAACGGCTTCCGTCGCGACGCCCACCCGATGGCCGTCATGTGCGGCGTGGTCGGCGCGCTTTCA…
176	LAB0008	FRA	Biofilm	KJ878378		Berge et al., 2014	GAGGGCGCTGCCCCCGTCGAGCTGCCAATTCTGACCGGTACAGTGGGTCCGGACGTGATCGACGTACGCGGTCTCACCGCCACCGGCCGCTTCACATTCGACCCTGGCTTCATGTCGACCGCCTCTTGCGAGTCGAAGATCACCTACATCGATGGTGACAACGGAATCCTGCTGCACCGCGGCTACCCTATCGAACAACTGGCCCAGCACTCCGACTACCTGGAGACCTGCTACCTGCTGCTCAACGGTGAATTGCCAACCGCCGAGCAGAAAGCCCAGTTCGTCGCCGTGGTCAAGAACCACACGATGGTCCACGAACAGCTCAAGACCTTTTTCAACGGCTTCCGTCGCGACGCCCACCCGATGGCCGTCATGTGCGGCGTGGTCGGCGCGCTTTCA…
176	LAB0020	FRA	Biofilm	KJ878379		Berge et al., 2014	GAGGGCGCTGCCCCCGTCGAGCTGCCAATTCTGACCGGTACAGTGGGTCCGGACGTGATCGACGTACGCGGTCTCACCGCCACCGGCCGCTTCACATTCGACCCTGGCTTCATGTCGACCGCCTCTTGCGAGTCGAAGATCACCTACATCGATGGTGACAACGGAATCCTGCTGCACCGCGGCTACCCTATCGAACAACTGGCCCAGCACTCCGACTACCTGGAGACCTGCTACCTGCTGCTCAACGGTGAATTGCCAACCGCCGAGCAGAAAGCCCAGTTCGTCGCCGTGGTCAAGAACCACACGATGGTCCACGAACAGCTCAAGACCTTTTTCAACGGCTTCCGTCGCGACGCCCACCCGATGGCCGTCATGTGCGGCGTGGTCGGCGCGCTTTCA…
176	LAB0023	FRA	Biofilm	KJ878380		Berge et al., 2014	GAGGGCGCTGCCCCCGTCGAGCTGCCAATTCTGACCGGTACAGTGGGTCCGGACGTGATCGACGTACGCGGTCTCACCGCCACCGGCCGCTTCACATTCGACCCTGGCTTCATGTCGACCGCCTCTTGCGAGTCGAAGATCACCTACATCGATGGTGACAACGGAATCCTGCTGCACCGCGGCTACCCTATCGAACAACTGGCCCAGCACTCCGACTACCTGGAGACCTGCTACCTGCTGCTCAACGGTGAATTGCCAACCGCCGAGCAGAAAGCCCAGTTCGTCGCCGTGGTCAAGAACCACACGATGGTCCACGAACAGCTCAAGACCTTTTTCAACGGCTTCCGTCGCGACGCCCACCCGATGGCCGTCATGTGCGGCGTGGTCGGCGCGCTTTCA…
176	LAB0062	FRA	Biofilm	KJ878384		Berge et al., 2014	GAGGGCGCTGCCCCCGTCGAGCTGCCAATTCTGACCGGTACAGTGGGTCCGGACGTGATCGACGTACGCGGTCTCACCGCCACCGGCCGCTTCACATTCGACCCTGGCTTCATGTCGACCGCCTCTTGCGAGTCGAAGATCACCTACATCGATGGTGACAACGGAATCCTGCTGCACCGCGGCTACCCTATCGAACAACTGGCCCAGCACTCCGACTACCTGGAGACCTGCTACCTGCTGCTCAACGGTGAATTGCCAACCGCCGAGCAGAAAGCCCAGTTCGTCGCCGTGGTCAAGAACCACACGATGGTCCACGAACAGCTCAAGACCTTTTTCAACGGCTTCCGTCGCGACGCCCACCCGATGGCCGTCATGTGCGGCGTGGTCGGCGCGCTTTCA…
176	LAB0123	FRA	Biofilm	KJ878392		Berge et al., 2014	GAGGGCGCTGCCCCCGTCGAGCTGCCAATTCTGACCGGTACAGTGGGTCCGGACGTGATCGACGTACGCGGTCTCACCGCCACCGGCCGCTTCACATTCGACCCTGGCTTCATGTCGACCGCCTCTTGCGAGTCGAAGATCACCTACATCGATGGTGACAACGGAATCCTGCTGCACCGCGGCTACCCTATCGAACAACTGGCCCAGCACTCCGACTACCTGGAGACCTGCTACCTGCTGCTCAACGGTGAATTGCCAACCGCCGAGCAGAAAGCCCAGTTCGTCGCCGTGGTCAAGAACCACACGATGGTCCACGAACAGCTCAAGACCTTTTTCAACGGCTTCCGTCGCGACGCCCACCCGATGGCCGTCATGTGCGGCGTGGTCGGCGCGCTTTCA…
176	LAB0163	FRA	Biofilm	KJ878400		Berge et al., 2014	GAGGGCGCTGCCCCCGTCGAGCTGCCAATTCTGACCGGTACAGTGGGTCCGGACGTGATCGACGTACGCGGTCTCACCGCCACCGGCCGCTTCACATTCGACCCTGGCTTCATGTCGACCGCCTCTTGCGAGTCGAAGATCACCTACATCGATGGTGACAACGGAATCCTGCTGCACCGCGGCTACCCTATCGAACAACTGGCCCAGCACTCCGACTACCTGGAGACCTGCTACCTGCTGCTCAACGGTGAATTGCCAACCGCCGAGCAGAAAGCCCAGTTCGTCGCCGTGGTCAAGAACCACACGATGGTCCACGAACAGCTCAAGACCTTTTTCAACGGCTTCCGTCGCGACGCCCACCCGATGGCCGTCATGTGCGGCGTGGTCGGCGCGCTTTCA…
176	SZB0035	FRA	Biofilm	KJ878471		Berge et al., 2014	AGGGCGCTGCCCCCGTCGAGCTGCCAATTCTGACCGGTACAGTGGGTCCGGACGTGATCGACGTACGCGGTCTCACCGCCACCGGCCGCTTCACATTCGACCCTGGCTTCATGTCGACCGCCTCTTGCGAGTCGAAGATCACCTACATCGATGGTGACAACGGAATCCTGCTGCACCGCGGCTACCCTATCGAACAACTGGCCCAGCACTCCGACTACCTGGAGACCTGCTACCTGCTGCTCAACGGTGAATTGCCAACCGCCGAGCAGAAAGCCCAGTTCGTCGCCGTGGTCAAGAACCACACGATGGTCCACGAACAGCTCAAGACCTTTTTCAACGGCTTCCGTCGCGACGCCCACCCGATGGCCGTCATGTGCGGCGTGGTCGGCGCGCTTTCAG…
177	AI0008	NZL	Freshwater	KJ877805		Berge et al., 2014	ACGGTACAGTGGGTCCGGACGTGATCGACGTACGCGGTCTCACCGCCACCGGCCGCTTCACATTCGACCCTGGTTTCATGTCGACCGCCTCTTGCGAGTCGAAGATCACCTACATCGATGGTGACAACGGAATCCTGCTGCACCGCGGCTACCCGATCGAACAACTGGCCCAGCATTCCGATTATCTGGAAACCTGCTACCTGCTGCTCAACGGCGAACTGCCAACCGCCGAGCAGAAAGCCCAGTTCGTCGCCGTGGTCAAGAACCACACGATGGTCCACGAACAGCTCAAGACCTTTTTCAACGGCTTCCGTCGCGACGCCCACCCGATGGCGGTCATGTGCGGCGTTGTAGGTGCCCTTTCAGCGTTCTACCACGACTCGCTGGACATCAATAACC…
177	CMW0010	FRA	Freshwater	KJ878162		Berge et al., 2014	GAGGGCGCTGCCCCCGTCGAGCTGCCAATTCTGACCGGTACAGTGGGTCCGGACGTGATCGACGTACGCGGTCTCACCGCCACCGGCCGCTTCACATTCGACCCTGGTTTCATGTCGACCGCCTCTTGCGAGTCGAAGATCACCTACATCGATGGTGACAACGGAATCCTGCTGCACCGCGGCTACCCGATCGAACAACTGGCCCAGCATTCCGATTATCTGGAAACCTGCTACCTGCTGCTCAACGGCGAACTGCCAACCGCCGAGCAGAAAGCCCAGTTCGTCGCCGTGGTCAAGAACCACACGATGGTCCACGAACAGCTCAAGACCTTTTTCAACGGCTTCCGTCGCGACGCCCACCCGATGGCGGTCATGTGCGGCGTTGTAGGTGCCCTTTCA…
177	TA0006	FRA	Freshwater	KJ878491		Berge et al., 2014	GTCGAGCTGCCAATTCTGACCGGTACAGTGGGTCCGGACGTGATCGACGTACGCGGTCTCACCGCCACCGGCCGCTTCACATTCGACCCTGGTTTCATGTCGACCGCCTCTTGCGAGTCGAAGATCACCTACATCGATGGTGACAACGGAATCCTGCTGCACCGCGGCTACCCGATCGAACAACTGGCCCAGCATTCCGATTATCTGGAAACCTGCTACCTGCTGCTCAACGGCGAACTGCCAACCGCCGAGCAGAAAGCCCAGTTCGTCGCCGTGGTCAAGAACCACACGATGGTCCACGAACAGCTCAAGACCTTTTTCAACGGCTTCCGTCGCGACGCCCACCCGATGGCGGTCATGTGCGGCGTTGTAGGTGCCCTTTCAGCGTTCTACCACGAC…
177	LMG26898	ESP	Plant	FRDA00000000		https://bccm.belspo.be/catalogues/lmg-catalogue-search	ATGGCTGACAAAAAAGCGCAGTTGATCATCGAGGGCGCAGCCCCCGTCGAGCTGCCAATTCTGACCGGTACAGTGGGTCCGGACGTGATCGACGTACGCGGTCTCACCGCCACCGGCCGCTTCACATTCGACCCTGGTTTCATGTCGACCGCCTCTTGCGAGTCGAAGATCACCTACATCGATGGTGACAACGGAATCCTGCTGCACCGCGGCTACCCGATCGAACAACTGGCCCAGCATTCCGATTATCTGGAAACCTGCTACCTGCTGCTCAACGGCGAACTGCCAACCGCCGAGCAGAAAGCCCAGTTCGTCGCCGTGGTCAAGAACCACACGATGGTCCACGAACAGCTCAAGACCTTTTTCAACGGCTTCCGTCGCGACGCCCACCCGATGGCG…
178	AI0012	NZL	Freshwater	KJ877807		Berge et al., 2014	ATTCTGACCGGTACAGTGGGTCCGGACGTGATCGACGTACGCGGTCTCACCGCCACCGGCCGCTTCACATTCGACCCTGGTTTCATGTCGACCGCCTCTTGCGAGTCGAAAATCACCTACATTGATGGTGACAACGGAATTCTGCTGCACCGCGGCTACCCTATCGAGCAACTGGCGCAGCATTCCGATTATCTGGAAACCTGCTACCTGCTGCTCAACGGCGAACTGCCGACCGCCGAGCAGAAAGCCCAGTTCGTCGCTGTGGTCAAGAACCACACGATGGTCCACGAACAGCTCAAGACCTTTTTCAACGGCTTCCGTCGCGACGCCCACCCGATGGCGGTCATGTGCGGCGTTGTAGGTGCCCTTTCAGCGTTCTACCACGACTCGCTGGACATC…
178	CC1524	FRA	Freshwater	AVEK00000000		Berge et al., 2014	ATGGCTGACAAAAAAGCGCAGTTGATCATCGAGGGCGCAGCCCCCGTCGAGCTGCCAATTCTGACCGGTACAGTGGGTCCGGACGTGATCGACGTACGCGGTCTCACCGCCACCGGCCGCTTCACATTCGACCCTGGTTTCATGTCGACCGCCTCTTGCGAGTCGAAAATCACCTACATTGATGGTGACAACGGAATTCTGCTGCACCGCGGCTACCCTATCGAGCAACTGGCGCAGCATTCCGATTATCTGGAAACCTGCTACCTGCTGCTCAACGGCGAACTGCCGACCGCCGAGCAGAAAGCCCAGTTCGTCGCTGTGGTCAAGAACCACACGATGGTCCACGAACAGCTCAAGACCTTTTTCAACGGCTTCCGTCGCGACGCCCACCCGATGGCG…
178	CCV0059	FRA	Freshwater	KJ878044		Berge et al., 2014	GCCCCCGTCGAGCTGCCAATTCTGACCGGTACAGTGGGTCCGGACGTGATCGACGTACGCGGTCTCACCGCCACCGGCCGCTTCACATTCGACCCTGGTTTCATGTCGACCGCCTCTTGCGAGTCGAAAATCACCTACATTGATGGTGACAACGGAATTCTGCTGCACCGCGGCTACCCTATCGAGCAACTGGCGCAGCATTCCGATTATCTGGAAACCTGCTACCTGCTGCTCAACGGCGAACTGCCGACCGCCGAGCAGAAAGCCCAGTTCGTCGCTGTGGTCAAGAACCACACGATGGTCCACGAACAGCTCAAGACCTTTTTCAACGGCTTCCGTCGCGACGCCCACCCGATGGCGGTCATGTGCGGCGTTGTAGGTGCCCTTTCAGCGTTCTAC…
178	CMW0004	FRA	Freshwater	KJ878159		Berge et al., 2014	GGGCGCTGCCCCCGTCGAGCTGCCAATTCTGACCGGTACAGTGGGTCCGGACGTGATCGACGTACGCGGTCTCACCGCCACCGGCCGCTTCACATTCGACCCTGGTTTCATGTCGACCGCCTCTTGCGAGTCGAAAATCACCTACATTGATGGTGACAACGGAATTCTGCTGCACCGCGGCTACCCTATCGAGCAACTGGCGCAGCATTCCGATTATCTGGAAACCTGCTACCTGCTGCTCAACGGCGAACTGCCGACCGCCGAGCAGAAAGCCCAGTTCGTCGCTGTGGTCAAGAACCACACGATGGTCCACGAACAGCTCAAGACCTTTTTCAACGGCTTCCGTCGCGACGCCCACCCGATGGCGGTCATGTGCGGCGTTGTAGGTGCCCTTTCAGC…
178	CMW0012	FRA	Freshwater	KJ878163		Berge et al., 2014	GAGGGCGCTGCCCCCGTCGAGCTGCCAATTCTGACCGGTACAGTGGGTCCGGACGTGATCGACGTACGCGGTCTCACCGCCACCGGCCGCTTCACATTCGACCCTGGTTTCATGTCGACCGCCTCTTGCGAGTCGAAAATCACCTACATTGATGGTGACAACGGAATTCTGCTGCACCGCGGCTACCCTATCGAGCAACTGGCGCAGCATTCCGATTATCTGGAAACCTGCTACCTGCTGCTCAACGGCGAACTGCCGACCGCCGAGCAGAAAGCCCAGTTCGTCGCTGTGGTCAAGAACCACACGATGGTCCACGAACAGCTCAAGACCTTTTTCAACGGCTTCCGTCGCGACGCCCACCCGATGGCGGTCATGTGCGGCGTTGTAGGTGCCCTTTCA…
178	CMW0033	FRA	Freshwater	KJ878170		Berge et al., 2014	AGGGCGCTGCCCCCGTCGAGCTGCCAATTCTGACCGGTACAGTGGGTCCGGACGTGATCGACGTACGCGGTCTCACCGCCACCGGCCGCTTCACATTCGACCCTGGTTTCATGTCGACCGCCTCTTGCGAGTCGAAAATCACCTACATTGATGGTGACAACGGAATTCTGCTGCACCGCGGCTACCCTATCGAGCAACTGGCGCAGCATTCCGATTATCTGGAAACCTGCTACCTGCTGCTCAACGGCGAACTGCCGACCGCCGAGCAGAAAGCCCAGTTCGTCGCTGTGGTCAAGAACCACACGATGGTCCACGAACAGCTCAAGACCTTTTTCAACGGCTTCCGTCGCGACGCCCACCCGATGGCGGTCATGTGCGGCGTTGTAGGTGCCCTTTCAG…
178	GAW0048	FRA	Irrigation_water	KJ878339		Berge et al., 2014	GAGGGCGCTGCCCCCGTCGAGCTGCCAATTCTGACCGGTACAGTGGGTCCGGACGTGATCGACGTACGCGGTCTCACCGCCACCGGCCGCTTCACATTCGACCCTGGTTTCATGTCGACCGCCTCTTGCGAGTCGAAAATCACCTACATTGATGGTGACAACGGAATTCTGCTGCACCGCGGCTACCCTATCGAGCAACTGGCGCAGCATTCCGATTATCTGGAAACCTGCTACCTGCTGCTCAACGGCGAACTGCCGACCGCCGAGCAGAAAGCCCAGTTCGTCGCTGTGGTCAAGAACCACACGATGGTCCACGAACAGCTCAAGACCTTTTTCAACGGCTTCCGTCGCGACGCCCACCCGATGGCGGTCATGTGCGGCGTTGTAGGTGCCCTTTCA…
178	LAB0007	FRA	Biofilm	KJ878377		Berge et al., 2014	GAGGGCGCTGCCCCCGTCGAGCTGCCAATTCTGACCGGTACAGTGGGTCCGGACGTGATCGACGTACGCGGTCTCACCGCCACCGGCCGCTTCACATTCGACCCTGGTTTCATGTCGACCGCCTCTTGCGAGTCGAAAATCACCTACATTGATGGTGACAACGGAATTCTGCTGCACCGCGGCTACCCTATCGAGCAACTGGCGCAGCATTCCGATTATCTGGAAACCTGCTACCTGCTGCTCAACGGCGAACTGCCGACCGCCGAGCAGAAAGCCCAGTTCGTCGCTGTGGTCAAGAACCACACGATGGTCCACGAACAGCTCAAGACCTTTTTCAACGGCTTCCGTCGCGACGCCCACCCGATGGCGGTCATGTGCGGCGTTGTAGGTGCCCTTTCA…
178	LAB0122	FRA	Biofilm	KJ878391		Berge et al., 2014	AGGGCGCTGCCCCCGTCGAGCTGCCAATTCTGACCGGTACAGTGGGTCCGGACGTGATCGACGTACGCGGTCTCACCGCCACCGGCCGCTTCACATTCGACCCTGGTTTCATGTCGACCGCCTCTTGCGAGTCGAAAATCACCTACATTGATGGTGACAACGGAATTCTGCTGCACCGCGGCTACCCTATCGAGCAACTGGCGCAGCATTCCGATTATCTGGAAACCTGCTACCTGCTGCTCAACGGCGAACTGCCGACCGCCGAGCAGAAAGCCCAGTTCGTCGCTGTGGTCAAGAACCACACGATGGTCCACGAACAGCTCAAGACCTTTTTCAACGGCTTCCGTCGCGACGCCCACCCGATGGCGGTCATGTGCGGCGTTGTAGGTGCCCTTTCAG…
178	LNW0042	FRA	Irrigation_water	KJ878414		Berge et al., 2014	GAGGGCGCTGCCCCCGTCGAGCTGCCAATTCTGACCGGTACAGTGGGTCCGGACGTGATCGACGTACGCGGTCTCACCGCCACCGGCCGCTTCACATTCGACCCTGGTTTCATGTCGACCGCCTCTTGCGAGTCGAAAATCACCTACATTGATGGTGACAACGGAATTCTGCTGCACCGCGGCTACCCTATCGAGCAACTGGCGCAGCATTCCGATTATCTGGAAACCTGCTACCTGCTGCTCAACGGCGAACTGCCGACCGCCGAGCAGAAAGCCCAGTTCGTCGCTGTGGTCAAGAACCACACGATGGTCCACGAACAGCTCAAGACCTTTTTCAACGGCTTCCGTCGCGACGCCCACCCGATGGCGGTCATGTGCGGCGTTGTAGGTGCCCTTTCA…
178	UB0169	FRA	Freshwater	KJ878503		Berge et al., 2014	GTGATCGACGTACGCGGTCTCACCGCCACCGGCCGCTTCACATTCGACCCTGGTTTCATGTCGACCGCCTCTTGCGAGTCGAAAATCACCTACATTGATGGTGACAACGGAATTCTGCTGCACCGCGGCTACCCTATCGAGCAACTGGCGCAGCATTCCGATTATCTGGAAACCTGCTACCTGCTGCTCAACGGCGAACTGCCGACCGCCGAGCAGAAAGCCCAGTTCGTCGCTGTGGTCAAGAACCACACGATGGTCCACGAACAGCTCAAGACCTTTTTCAACGGCTTCCGTCGCGACGCCCACCCGATGGCGGTCATGTGCGGCGTTGTAGGTGCCCTTTCAGCGTTCTACCACGACTCGCTGGACATCAATAACCCTCAGCACCGCGAAATTTCG…
179	LNW0029	FRA	Irrigation_water	KJ878410		Berge et al., 2014	GGCGCTGCCCCCGTCGAGCTGCCAATTCTGACCGGTACAGTGGGTCCGGACGTGATCGACGTACGCGGTCTCACCGCCACCGGCCGCTTCACATTCGACCCTGGTTTCATGTCGACCGCCTCTTGCGAGTCGAAAATCACCTACATTGATGGTGACAACGGAATTCTGCTGCACCGCGGCTACCCTATCGAGCAATTGGCGCAGCATTCCGATTATCTGGAAACCTGCTACCTGCTGCTCAACGGCGAACTGCCGACCGCCGAGCAGAAAGCCCAGTTCGTCGCTGTGGTCAAGAACCACACGATGGTCCACGAACAGCTCAAGACCTTTTTCAACGGCTTCCGTCGCGACGCCCACCCGATGGCGGTCATGTGCGGCGTTGTAGGTGCCCTTTCAGCG…
179	USA0091	USA	Freshwater	KJ878543		Berge et al., 2014	GTGATCGACGTACGCGGTCTCACCGCCACCGGCCGCTTCACATTCGACCCTGGTTTCATGTCGACCGCCTCTTGCGAGTCGAAAATCACCTACATTGATGGTGACAACGGAATTCTGCTGCACCGCGGCTACCCTATCGAGCAATTGGCGCAGCATTCCGATTATCTGGAAACCTGCTACCTGCTGCTCAACGGCGAACTGCCGACCGCCGAGCAGAAAGCCCAGTTCGTCGCTGTGGTCAAGAACCACACGATGGTCCACGAACAGCTCAAGACCTTTTTCAACGGCTTCCGTCGCGACGCCCACCCGATGGCGGTCATGTGCGGCGTTGTAGGTGCCCTTTCAGCGTTCTACCACGACTCGCTGGACATCAATAACCCTCAGCACCGCGAAATTTCG…
180	AI0095	NZL	Freshwater	KJ877832		Berge et al., 2014	TTCTGACCGGTACAGTGGGTCCGGACGTGATCGACGTACGCGGTCTCACCGCCACCGGCCGCTTCACATTCGACCCTGGTTTCATGTCGACCGCCTCTTGCGAGTCGAAAATCACCTACATTGATGGTGACAACGGAATTCTGCTGCACCGCGGCTACCCTATCGAGCAACTGGCGCAGCATTCCGATTATCTGGAAACCTGCTACCTGCTGCTCAACGGCGAACTGCCGACCGCCGAGCAGAAAGCCCAGTTCGTCGCTGTGGTCAAGAACCACACGATGGTCCACGAACAGCTCAAGACCTTTTTCAACGGTTTCCGTCGCGACGCCCACCCGATGGCGGTCATGTGCGGCGTTGTAGGTGCCCTTTCAGCGTTCTACCACGACTCGCTGGACATCA…
180	AI0105	NZL	Freshwater	KJ877833		Berge et al., 2014	ATTCTGACCGGTACAGTGGGTCCGGACGTGATCGACGTACGCGGTCTCACCGCCACCGGCCGCTTCACATTCGACCCTGGTTTCATGTCGACCGCCTCTTGCGAGTCGAAAATCACCTACATTGATGGTGACAACGGAATTCTGCTGCACCGCGGCTACCCTATCGAGCAACTGGCGCAGCATTCCGATTATCTGGAAACCTGCTACCTGCTGCTCAACGGCGAACTGCCGACCGCCGAGCAGAAAGCCCAGTTCGTCGCTGTGGTCAAGAACCACACGATGGTCCACGAACAGCTCAAGACCTTTTTCAACGGTTTCCGTCGCGACGCCCACCCGATGGCGGTCATGTGCGGCGTTGTAGGTGCCCTTTCAGCGTTCTACCACGACTCGCTGGACATC…
180	CC1417	USA	Biofilm	AVEO00000000		Berge et al., 2014	ATGGCTGACAAAAAAGCGCAGTTGATCATCGAGGGCGCAGCCCCCGTCGAGCTGCCAATTCTGACCGGTACAGTGGGTCCGGACGTGATCGACGTACGCGGTCTCACCGCCACCGGCCGCTTCACATTCGACCCTGGTTTCATGTCGACCGCCTCTTGCGAGTCGAAAATCACCTACATTGATGGTGACAACGGAATTCTGCTGCACCGCGGCTACCCTATCGAGCAACTGGCGCAGCATTCCGATTATCTGGAAACCTGCTACCTGCTGCTCAACGGCGAACTGCCGACCGCCGAGCAGAAAGCCCAGTTCGTCGCTGTGGTCAAGAACCACACGATGGTCCACGAACAGCTCAAGACCTTTTTCAACGGTTTCCGTCGCGACGCCCACCCGATGGCG…
180	CC1418	USA	Biofilm	KJ877866		Berge et al., 2014	GACGTTACGCGGTCTCACCCGCCACCGGCCGCTTCACATTCGACCCTGGTTTCCATGTCGACCGCCTCTTGCGAGTCGAAAATCACCTACATTGATGGTGACAACGGAATTCTGCTGCACCGCGGCTACCCTATCGAGCAACTGGCGCAGCATTCCGATTATCTGGAAACCTGCTACCTGCTGCTCAACGGCGAACTGCCGACCGCCGAGCAGAAAGCCCAGTTCGTCGCTGTGGTCAAGAACCACACGATGGTCCACGAACAGCTCAAGACCTTTTTCAACGGTTTCCGTCGCGACGCCCACCCGATGGCGGTCATGTGCGGCGTTGTAGGTGCCCTTTCAGCGTTCTACCACGACTCGCTGGACATCAATAACCCTCAGCACCGCGAAATTTCGGCA…
180	CC1419	USA	Biofilm	KJ877867		Berge et al., 2014	CGACGTACGCGGTCTCACCGCCACCGGCCGCTTCACATTCGACCCTGGTTTCATGTCGACCGCCTCCTTGCGAGTCGAAAATCACCTACATTGATGGTGACAACGGAATTCTGCTGCACCGCGGCTACCCTATCGAGCAACTGGCGCAGCATTCCGATTATCTGGAAACCTGCTACCTGCTGCTCAACGGCGAACTGCCGACCGCCGAGCAGAAAGCCCAGTTCGTCGCTGTGGTCAAGAACCACACGATGGTCCACGAACAGCTCAAGACCTTTTTCAACGGTTTCCGTCGCGACGCCCACCCGATGGCGGTCATGTGCGGCGTTGTAGGTGCCCTTTCAGCGTTCTACCACGACTCGCTGGACATCAATAACCCTCAGCACCGCGAAATTTCGGCAG…
180	CC1420	USA	Biofilm	KJ877868		Berge et al., 2014	CGCTGCCCCCGTCGAGCTGCCAATTCTGACCGGTACAGTGGGTCCGGACGTGATCGACGTACGCGGTCTCACCGCCACCGGCCGCTTCACATTCGACCCTGGTTTCATGTCGACCGCCTCTTGCGAGTCGAAAATCACCTACATTGATGGTGACAACGGAATTCTGCTGCACCGCGGCTACCCTATCGAGCAACTGGCGCAGCATTCCGATTATCTGGAAACCTGCTACCTGCTGCTCAACGGCGAACTGCCGACCGCCGAGCAGAAAGCCCAGTTCGTCGCTGTGGTCAAGAACCACACGATGGTCCACGAACAGCTCAAGACCTTTTTCAACGGTTTCCGTCGCGACGCCCACCCGATGGCGGTCATGTGCGGCGTTGTAGGTGCCCTTTCAGCGTT…
180	LAB0005	FRA	Biofilm	KJ878375		Berge et al., 2014	GAGGGCGCTGCCCCCGTCGAGCTGCCAATTCTGACCGGTACAGTGGGTCCGGACGTGATCGACGTACGCGGTCTCACCGCCACCGGCCGCTTCACATTCGACCCTGGTTTCATGTCGACCGCCTCTTGCGAGTCGAAAATCACCTACATTGATGGTGACAACGGAATTCTGCTGCACCGCGGCTACCCTATCGAGCAACTGGCGCAGCATTCCGATTATCTGGAAACCTGCTACCTGCTGCTCAACGGCGAACTGCCGACCGCCGAGCAGAAAGCCCAGTTCGTCGCTGTGGTCAAGAACCACACGATGGTCCACGAACAGCTCAAGACCTTTTTCAACGGTTTCCGTCGCGACGCCCACCCGATGGCGGTCATGTGCGGCGTTGTAGGTGCCCTTTCA…
180	LAB0160	FRA	Biofilm	KJ878398		Berge et al., 2014	GGGCGCTGCCCCCGTCGAGCTGCCAATTCTGACCGGTACAGTGGGTCCGGACGTGATCGACGTACGCGGTCTCACCGCCACCGGCCGCTTCACATTCGACCCTGGTTTCATGTCGACCGCCTCTTGCGAGTCGAAAATCACCTACATTGATGGTGACAACGGAATTCTGCTGCACCGCGGCTACCCTATCGAGCAACTGGCGCAGCATTCCGATTATCTGGAAACCTGCTACCTGCTGCTCAACGGCGAACTGCCGACCGCCGAGCAGAAAGCCCAGTTCGTCGCTGTGGTCAAGAACCACACGATGGTCCACGAACAGCTCAAGACCTTTTTCAACGGTTTCCGTCGCGACGCCCACCCGATGGCGGTCATGTGCGGCGTTGTAGGTGCCCTTTCAGC…
180	USA0053	USA	Freshwater	KJ878539		Berge et al., 2014	TGATCGACGTACGCGGTCTCACCGCCACCGGCCGCTTCACATTCGACCCTGGTTTCATGTCGACCGCCTCTTGCGAGTCGAAAATCACCTACATTGATGGTGACAACGGAATTCTGCTGCACCGCGGCTACCCTATCGAGCAACTGGCGCAGCATTCCGATTATCTGGAAACCTGCTACCTGCTGCTCAACGGCGAACTGCCGACCGCCGAGCAGAAAGCCCAGTTCGTCGCTGTGGTCAAGAACCACACGATGGTCCACGAACAGCTCAAGACCTTTTTCAACGGTTTCCGTCGCGACGCCCACCCGATGGCGGTCATGTGCGGCGTTGTAGGTGCCCTTTCAGCGTTCTACCACGACTCGCTGGACATCAATAACCCTCAGCACCGCGAAATTTCGG…
181	CMO0085	FRA	Rain	KJ878154		Berge et al., 2014	GGGCGCTGCCCCCGTCGAGCTGCCAATTCTGACCGGTACAGTGGGTCCGGACGTGATCGACGTACGCGGTCTCACCGCCACCGGCCGCTTCACATTCGACCCGGGCTTCATGTCGACCGCCTCTTGCGAGTCGAAAATCACCTACATCGATGGTGACAACGGAATCCTGCTTCACCGCGGCTACCCTATCGAACAACTGGCCCAGCATTCCGACTACCTGGAAACCTGCTACCTGCTGCTCAACGGCGAATTGCCCACCGCCGAGCAGAAAGCCCAATTCGTTGCCGTGGTGAAAAACCACACGATGGTCCACGAACAGCTCAAGACCTTTTTCAACGGCTTTCGCCGTGACGCCCACCCGATGGCCGTCATGTGCGGCGTAGTCGGCGCATTGTCGGC…
181	CST0099	FRA	Rain	KJ878197		Berge et al., 2014	AGGGCGCTGCCCCCGTCGAGCTGCCAATTCTGACCGGTACAGTGGGTCCGGACGTGATCGACGTACGCGGTCTCACCGCCACCGGCCGCTTCACATTCGACCCGGGCTTCATGTCGACCGCCTCTTGCGAGTCGAAAATCACCTACATCGATGGTGACAACGGAATCCTGCTTCACCGCGGCTACCCTATCGAACAACTGGCCCAGCATTCCGACTACCTGGAAACCTGCTACCTGCTGCTCAACGGCGAATTGCCCACCGCCGAGCAGAAAGCCCAATTCGTTGCCGTGGTGAAAAACCACACGATGGTCCACGAACAGCTCAAGACCTTTTTCAACGGCTTTCGCCGTGACGCCCACCCGATGGCCGTCATGTGCGGCGTAGTCGGCGCATTGTCGG…
181	GAW0203	FRA	Irrigation_water	KJ878357		Berge et al., 2014	GGGCGCTGCCCCCGTCGAGCTGCCAATTCTGACCGGTACAGTGGGTCCGGACGTGATCGACGTACGCGGTCTCACCGCCACCGGCCGCTTCACATTCGACCCGGGCTTCATGTCGACCGCCTCTTGCGAGTCGAAAATCACCTACATCGATGGTGACAACGGAATCCTGCTTCACCGCGGCTACCCTATCGAACAACTGGCCCAGCATTCCGACTACCTGGAAACCTGCTACCTGCTGCTCAACGGCGAATTGCCCACCGCCGAGCAGAAAGCCCAATTCGTTGCCGTGGTGAAAAACCACACGATGGTCCACGAACAGCTCAAGACCTTTTTCAACGGCTTTCGCCGTGACGCCCACCCGATGGCCGTCATGTGCGGCGTAGTCGGCGCATTATCGGC…
181	LYR0041	FRA	Rain	KJ878417		Berge et al., 2014	AGGGCGCTGCCCCCGTCGAGCTGCCAATTCTGACCGGTACAGTGGGTCCGGACGTGATCGACGTACGCGGTCTCACCGCCACCGGCCGCTTCACATTCGACCCGGGCTTCATGTCGACCGCCTCTTGCGAGTCGAAAATCACCTACATCGATGGTGACAACGGAATCCTGCTTCACCGCGGCTACCCTATCGAACAACTGGCCCAGCATTCCGACTACCTGGAAACCTGCTACCTGCTGCTCAACGGCGAATTGCCCACCGCCGAGCAGAAAGCCCAATTCGTTGCCGTGGTGAAAAACCACACGATGGTCCACGAACAGCTCAAGACCTTTTTCAACGGCTTTCGCCGTGACGCCCACCCGATGGCCGTCATGTGCGGCGTAGTCGGCGCATTATCGG…
182	CCE0076	FRA	Freshwater	KJ877922		Berge et al., 2014	GCCCCCGTCGAGCTGCCCATTCTCACCGGCACCGTAGGCCCCGACGTGATCGACGTACGTGGTCTCACAGCCACCGGCCGCTTCACATTCGACCCAGGCTTCATGTCGACCGCCTCTTGCGAGTCGAAGATCACCTACATTGATGGTGACAACGGGATCCTGCTGCACCGCGGCTATCCGATCGAACAACTGGCCGAGCAATCGGACTACCTGGAAACGTGCTATCTGCTACTGAACGGCGAGCTGCCAACCGCCGAGCAGAAAGCCCAGTTCGTTGTTGTCGTGAAAAACCACACCATGGTTCACGAACAGCTCAAGACCTTTTTCAACGGCTTCCGCCGCGACGCTCACCCGATGGCGGTGATGTGTGGTGTGGTGGGTGCCCTCTCGGCGTTCTAT…
182	CCE0646	FRA	Leaf_litter	KJ877996		Berge et al., 2014	ACGTGATCGACGTACGTGGTCTCACAGCCACCGGCCGCTTCACATTCGACCCAGGCTTCATGTCGACCGCCTCTTGCGAGTCGAAGATCACCTACATTGATGGTGACAACGGGATCCTGCTGCACCGCGGCTATCCGATCGAACAACTGGCCGAGCAATCGGACTACCTGGAAACGTGCTATCTGCTACTGAACGGCGAGCTGCCAACCGCCGAGCAGAAAGCCCAGTTCGTTGTTGTCGTGAAAAACCACACCATGGTTCACGAACAGCTCAAGACCTTTTTCAACGGCTTCCGCCGCGACGCTCACCCGATGGCGGTGATGTGTGGTGTGGTGGGTGCCCTCTCGGCGTTCTATCACGACTCTCTGGACATCAATAATCCACAGCACCGTGAAATCT…
182	CSZ0143	FRA	Snowpack	KJ878204		Berge et al., 2014	CAATATGTTGATCCCACGAGGGCGCTGCCCCCGTCGAGCTGCCCATTCTCACCGGCACCGTAGGCCCCGACGTGATCGACGTACGTGGTCTCACAGCCACCGGCCGCTTCACATTCGACCCAGGCTTCATGTCGACCGCCTCTTGCGAGTCGAAGATCACCTACATTGATGGTGACAACGGGATCCTGCTGCACCGCGGCTATCCGATCGAACAACTGGCCGAGCAATCGGACTACCTGGAAACGTGCTATCTGCTACTGAACGGCGAGCTGCCAACCGCCGAGCAGAAAGCCCAGTTCGTTGTTGTCGTGAAAAACCACACCATGGTTCACGAACAGCTCAAGACCTTTTTCAACGGCTTCCGCCGCGACGCTCACCCGATGGCGGTGATGTGTGGTG…
182	CSZ0289	FRA	Snowpack	KJ878230		Berge et al., 2014	GAGGGCGCTGCCCCCGTCGAGCTGCCCATTCTCACCGGCACCGTAGGCCCCGACGTGATCGACGTACGTGGTCTCACAGCCACCGGCCGCTTCACATTCGACCCAGGCTTCATGTCGACCGCCTCTTGCGAGTCGAAGATCACCTACATTGATGGTGACAACGGGATCCTGCTGCACCGCGGCTATCCGATCGAACAACTGGCCGAGCAATCGGACTACCTGGAAACGTGCTATCTGCTACTGAACGGCGAGCTGCCAACCGCCGAGCAGAAAGCCCAGTTCGTTGTTGTCGTGAAAAACCACACCATGGTTCACGAACAGCTCAAGACCTTTTTCAACGGCTTCCGCCGCGACGCTCACCCGATGGCGGTGATGTGTGGTGTGGTGGGTGCCCTCTCG…
182	CSZ0317	FRA	Snowpack	KJ878241		Berge et al., 2014	GAGGGCGCTGCCCCCGTCGAGCTGCCCATTCTCACCGGCACCGTAGGCCCCGACGTGATCGACGTACGTGGTCTCACAGCCACCGGCCGCTTCACATTCGACCCAGGCTTCATGTCGACCGCCTCTTGCGAGTCGAAGATCACCTACATTGATGGTGACAACGGGATCCTGCTGCACCGCGGCTATCCGATCGAACAACTGGCCGAGCAATCGGACTACCTGGAAACGTGCTATCTGCTACTGAACGGCGAGCTGCCAACCGCCGAGCAGAAAGCCCAGTTCGTTGTTGTCGTGAAAAACCACACCATGGTTCACGAACAGCTCAAGACCTTTTTCAACGGCTTCCGCCGCGACGCTCACCCGATGGCGGTGATGTGTGGTGTGGTGGGTGCCCTCTCG…
182	CSZ0318	FRA	Snowpack	KJ878242		Berge et al., 2014	GAGGGCGCTGCCCCCGTCGAGCTGCCCATTCTCACCGGCACCGTAGGCCCCGACGTGATCGACGTACGTGGTCTCACAGCCACCGGCCGCTTCACATTCGACCCAGGCTTCATGTCGACCGCCTCTTGCGAGTCGAAGATCACCTACATTGATGGTGACAACGGGATCCTGCTGCACCGCGGCTATCCGATCGAACAACTGGCCGAGCAATCGGACTACCTGGAAACGTGCTATCTGCTACTGAACGGCGAGCTGCCAACCGCCGAGCAGAAAGCCCAGTTCGTTGTTGTCGTGAAAAACCACACCATGGTTCACGAACAGCTCAAGACCTTTTTCAACGGCTTCCGCCGCGACGCTCACCCGATGGCGGTGATGTGTGGTGTGGTGGGTGCCCTCTCG…
182	CSZ0319	FRA	Snowpack	KJ878243		Berge et al., 2014	GAGGGCGCTGCCCCCGTCGAGCTGCCCATTCTCACCGGCACCGTAGGCCCCGACGTGATCGACGTACGTGGTCTCACAGCCACCGGCCGCTTCACATTCGACCCAGGCTTCATGTCGACCGCCTCTTGCGAGTCGAAGATCACCTACATTGATGGTGACAACGGGATCCTGCTGCACCGCGGCTATCCGATCGAACAACTGGCCGAGCAATCGGACTACCTGGAAACGTGCTATCTGCTACTGAACGGCGAGCTGCCAACCGCCGAGCAGAAAGCCCAGTTCGTTGTTGTCGTGAAAAACCACACCATGGTTCACGAACAGCTCAAGACCTTTTTCAACGGCTTCCGCCGCGACGCTCACCCGATGGCGGTGATGTGTGGTGTGGTGGGTGCCCTCTCG…
182	CSZ0320	FRA	Snowpack	KJ878244		Berge et al., 2014	GAGGGCGCTGCCCCCGTCGAGCTGCCCATTCTCACCGGCACCGTAGGCCCCGACGTGATCGACGTACGTGGTCTCACAGCCACCGGCCGCTTCACATTCGACCCAGGCTTCATGTCGACCGCCTCTTGCGAGTCGAAGATCACCTACATTGATGGTGACAACGGGATCCTGCTGCACCGCGGCTATCCGATCGAACAACTGGCCGAGCAATCGGACTACCTGGAAACGTGCTATCTGCTACTGAACGGCGAGCTGCCAACCGCCGAGCAGAAAGCCCAGTTCGTTGTTGTCGTGAAAAACCACACCATGGTTCACGAACAGCTCAAGACCTTTTTCAACGGCTTCCGCCGCGACGCTCACCCGATGGCGGTGATGTGTGGTGTGGTGGGTGCCCTCTCG…
182	CSZ0322	FRA	Snowpack	KJ878246		Berge et al., 2014	GAGGGCGCTGCCCCCGTCGAGCTGCCCATTCTCACCGGCACCGTAGGCCCCGACGTGATCGACGTACGTGGTCTCACAGCCACCGGCCGCTTCACATTCGACCCAGGCTTCATGTCGACCGCCTCTTGCGAGTCGAAGATCACCTACATTGATGGTGACAACGGGATCCTGCTGCACCGCGGCTATCCGATCGAACAACTGGCCGAGCAATCGGACTACCTGGAAACGTGCTATCTGCTACTGAACGGCGAGCTGCCAACCGCCGAGCAGAAAGCCCAGTTCGTTGTTGTCGTGAAAAACCACACCATGGTTCACGAACAGCTCAAGACCTTTTTCAACGGCTTCCGCCGCGACGCTCACCCGATGGCGGTGATGTGTGGTGTGGTGGGTGCCCTCTCG…
182	CSZ0323	FRA	Snowpack	KJ878247		Berge et al., 2014	GAGGGCGCTGCCCCCGTCGAGCTGCCCATTCTCACCGGCACCGTAGGCCCCGACGTGATCGACGTACGTGGTCTCACAGCCACCGGCCGCTTCACATTCGACCCAGGCTTCATGTCGACCGCCTCTTGCGAGTCGAAGATCACCTACATTGATGGTGACAACGGGATCCTGCTGCACCGCGGCTATCCGATCGAACAACTGGCCGAGCAATCGGACTACCTGGAAACGTGCTATCTGCTACTGAACGGCGAGCTGCCAACCGCCGAGCAGAAAGCCCAGTTCGTTGTTGTCGTGAAAAACCACACCATGGTTCACGAACAGCTCAAGACCTTTTTCAACGGCTTCCGCCGCGACGCTCACCCGATGGCGGTGATGTGTGGTGTGGTGGGTGCCCTCTCG…
182	CSZ0325	FRA	Snowpack	KJ878249		Berge et al., 2014	GAGGGCGCTGCCCCCGTCGAGCTGCCCATTCTCACCGGCACCGTAGGCCCCGACGTGATCGACGTACGTGGTCTCACAGCCACCGGCCGCTTCACATTCGACCCAGGCTTCATGTCGACCGCCTCTTGCGAGTCGAAGATCACCTACATTGATGGTGACAACGGGATCCTGCTGCACCGCGGCTATCCGATCGAACAACTGGCCGAGCAATCGGACTACCTGGAAACGTGCTATCTGCTACTGAACGGCGAGCTGCCAACCGCCGAGCAGAAAGCCCAGTTCGTTGTTGTCGTGAAAAACCACACCATGGTTCACGAACAGCTCAAGACCTTTTTCAACGGCTTCCGCCGCGACGCTCACCCGATGGCGGTGATGTGTGGTGTGGTGGGTGCCCTCTCG…
182	CSZ0327	FRA	Snowpack	KJ878251		Berge et al., 2014	GAGGGCGCTGCCCCCGTCGAGCTGCCCATTCTCACCGGCACCGTAGGCCCCGACGTGATCGACGTACGTGGTCTCACAGCCACCGGCCGCTTCACATTCGACCCAGGCTTCATGTCGACCGCCTCTTGCGAGTCGAAGATCACCTACATTGATGGTGACAACGGGATCCTGCTGCACCGCGGCTATCCGATCGAACAACTGGCCGAGCAATCGGACTACCTGGAAACGTGCTATCTGCTACTGAACGGCGAGCTGCCAACCGCCGAGCAGAAAGCCCAGTTCGTTGTTGTCGTGAAAAACCACACCATGGTTCACGAACAGCTCAAGACCTTTTTCAACGGCTTCCGCCGCGACGCTCACCCGATGGCGGTGATGTGTGGTGTGGTGGGTGCCCTCTCG…
183	CCE0878	FRA	Leaf_litter	KJ878021		Berge et al., 2014	ATCGACGTACGTGGTCTCACAGCCACCGGCCGCTTCACATTCGACCCAGGCTTCATGTCGACCGCCTCTTGCGAGTCGAAGATCACCTACATTGATGGTGACAACGGGATCCTGCTGCACCGCGGCTATCCGATCGAACAACTGGCCGAGCAATCGGACTACCTGGAAACGTGCTATCTGCTACTGAACGGCGAGCTGCCAACCGCCGAGCAGAAAGCCCAGTTCGTTGTTGTCGTGAAAAACCACACCATGGTTCACGAACAGCTCAAGACCTTTTTCAACGGCTTCCGCCGCGACGCTCACCCGATGGCGGTGATGTGTGGTGTGGTAGGTGCCCTCTCGGCGTTCTATCACGACTCTCTGGACATCAATAATCCACAGCACCGTGAAATCTCGGCC…
183	CCE0889	FRA	Leaf_litter	KJ878024		Berge et al., 2014	TGATCGACGTACGTGGTCTCACAGCCACCGGCCGCTTCACATTCGACCCAGGCTTCATGTCGACCGCCTCTTGCGAGTCGAAGATCACCTACATTGATGGTGACAACGGGATCCTGCTGCACCGCGGCTATCCGATCGAACAACTGGCCGAGCAATCGGACTACCTGGAAACGTGCTATCTGCTACTGAACGGCGAGCTGCCAACCGCCGAGCAGAAAGCCCAGTTCGTTGTTGTCGTGAAAAACCACACCATGGTTCACGAACAGCTCAAGACCTTTTTCAACGGCTTCCGCCGCGACGCTCACCCGATGGCGGTGATGTGTGGTGTGGTAGGTGCCCTCTCGGCGTTCTATCACGACTCTCTGGACATCAATAATCCACAGCACCGTGAAATCTCGG…
183	CCV0055	FRA	Freshwater	KJ878042		Berge et al., 2014	GCCCCCGTCGAGCTGCCCATTCTCACCGGCACCGTAGGCCCCGACGTGATCGACGTACGTGGTCTCACAGCCACCGGCCGCTTCACATTCGACCCAGGCTTCATGTCGACCGCCTCTTGCGAGTCGAAGATCACCTACATTGATGGTGACAACGGGATCCTGCTGCACCGCGGCTATCCGATCGAACAACTGGCCGAGCAATCGGACTACCTGGAAACGTGCTATCTGCTACTGAACGGCGAGCTGCCAACCGCCGAGCAGAAAGCCCAGTTCGTTGTTGTCGTGAAAAACCACACCATGGTTCACGAACAGCTCAAGACCTTTTTCAACGGCTTCCGCCGCGACGCTCACCCGATGGCGGTGATGTGTGGTGTGGTAGGTGCCCTCTCGGCGTTCTAT…
183	CCV0104	FRA	Freshwater	KJ878056		Berge et al., 2014	GCCCCCGTCGAGCTGCCCATTCTCACCGGCACCGTAGGCCCCGACGTGATCGACGTACGTGGTCTCACAGCCACCGGCCGCTTCACATTCGACCCAGGCTTCATGTCGACCGCCTCTTGCGAGTCGAAGATCACCTACATTGATGGTGACAACGGGATCCTGCTGCACCGCGGCTATCCGATCGAACAACTGGCCGAGCAATCGGACTACCTGGAAACGTGCTATCTGCTACTGAACGGCGAGCTGCCAACCGCCGAGCAGAAAGCCCAGTTCGTTGTTGTCGTGAAAAACCACACCATGGTTCACGAACAGCTCAAGACCTTTTTCAACGGCTTCCGCCGCGACGCTCACCCGATGGCGGTGATGTGTGGTGTGGTAGGTGCCCTCTCGGCGTTCTAT…
183	CCV0170	FRA	Freshwater	KJ878064		Berge et al., 2014	GCCCCCGTCGAGCTGCCCATTCTCACCGGCACCGTAGGCCCCGACGTGATCGACGTACGTGGTCTCACAGCCACCGGCCGCTTCACATTCGACCCAGGCTTCATGTCGACCGCCTCTTGCGAGTCGAAGATCACCTACATTGATGGTGACAACGGGATCCTGCTGCACCGCGGCTATCCGATCGAACAACTGGCCGAGCAATCGGACTACCTGGAAACGTGCTATCTGCTACTGAACGGCGAGCTGCCAACCGCCGAGCAGAAAGCCCAGTTCGTTGTTGTCGTGAAAAACCACACCATGGTTCACGAACAGCTCAAGACCTTTTTCAACGGCTTCCGCCGCGACGCTCACCCGATGGCGGTGATGTGTGGTGTGGTAGGTGCCCTCTCGGCGTTCTAT…
183	CSZ0137	FRA	Snowpack	KJ878202		Berge et al., 2014	TCAGTTGATCCCACGAGGGCGCTGCCCCCGTCGAGCTGCCCATTCTCACCGGCACCGTAGGCCCCGACGTGATCGACGTACGTGGTCTCACAGCCACCGGCCGCTTCACATTCGACCCAGGCTTCATGTCGACCGCCTCTTGCGAGTCGAAGATCACCTACATTGATGGTGACAACGGGATCCTGCTGCACCGCGGCTATCCGATCGAACAACTGGCCGAGCAATCGGACTACCTGGAAACGTGCTATCTGCTACTGAACGGCGAGCTGCCAACCGCCGAGCAGAAAGCCCAGTTCGTTGTTGTCGTGAAAAACCACACCATGGTTCACGAACAGCTCAAGACCTTTTTCAACGGCTTCCGCCGCGACGCTCACCCGATGGCGGTGATGTGTGGTGTGG…
183	CSZ0240	FRA	Freshwater	KJ878216		Berge et al., 2014	GCCCCCGTCGAGCTGCCCATTCTCACCGGCACCGTAGGCCCCGACGTGATCGACGTACGTGGTCTCACAGCCACCGGCCGCTTCACATTCGACCCAGGCTTCATGTCGACCGCCTCTTGCGAGTCGAAGATCACCTACATTGATGGTGACAACGGGATCCTGCTGCACCGCGGCTATCCGATCGAACAACTGGCCGAGCAATCGGACTACCTGGAAACGTGCTATCTGCTACTGAACGGCGAGCTGCCAACCGCCGAGCAGAAAGCCCAGTTCGTTGTTGTCGTGAAAAACCACACCATGGTTCACGAACAGCTCAAGACCTTTTTCAACGGCTTCCGCCGCGACGCTCACCCGATGGCGGTGATGTGTGGTGTGGTAGGTGCCCTCTCGGCGTTCTAT…
183	CSZ0256	FRA	Freshwater	KJ878220		Berge et al., 2014	GCCCCCGTCGAGCTGCCCATTCTCACCGGCACCGTAGGCCCCGACGTGATCGACGTACGTGGTCTCACAGCCACCGGCCGCTTCACATTCGACCCAGGCTTCATGTCGACCGCCTCTTGCGAGTCGAAGATCACCTACATTGATGGTGACAACGGGATCCTGCTGCACCGCGGCTATCCGATCGAACAACTGGCCGAGCAATCGGACTACCTGGAAACGTGCTATCTGCTACTGAACGGCGAGCTGCCAACCGCCGAGCAGAAAGCCCAGTTCGTTGTTGTCGTGAAAAACCACACCATGGTTCACGAACAGCTCAAGACCTTTTTCAACGGCTTCCGCCGCGACGCTCACCCGATGGCGGTGATGTGTGGTGTGGTAGGTGCCCTCTCGGCGTTCTAT…
183	CSZ0288	FRA	Snowpack	KJ878229		Berge et al., 2014	GAGGGCGCTGCCCCCGTCGAGCTGCCCATTCTCACCGGCACCGTAGGCCCCGACGTGATCGACGTACGTGGTCTCACAGCCACCGGCCGCTTCACATTCGACCCAGGCTTCATGTCGACCGCCTCTTGCGAGTCGAAGATCACCTACATTGATGGTGACAACGGGATCCTGCTGCACCGCGGCTATCCGATCGAACAACTGGCCGAGCAATCGGACTACCTGGAAACGTGCTATCTGCTACTGAACGGCGAGCTGCCAACCGCCGAGCAGAAAGCCCAGTTCGTTGTTGTCGTGAAAAACCACACCATGGTTCACGAACAGCTCAAGACCTTTTTCAACGGCTTCCGCCGCGACGCTCACCCGATGGCGGTGATGTGTGGTGTGGTAGGTGCCCTCTCG…
183	CSZ0291	FRA	Snowpack	KJ878232		Berge et al., 2014	GAGGGCGCTGCCCCCGTCGAGCTGCCCATTCTCACCGGCACCGTAGGCCCCGACGTGATCGACGTACGTGGTCTCACAGCCACCGGCCGCTTCACATTCGACCCAGGCTTCATGTCGACCGCCTCTTGCGAGTCGAAGATCACCTACATTGATGGTGACAACGGGATCCTGCTGCACCGCGGCTATCCGATCGAACAACTGGCCGAGCAATCGGACTACCTGGAAACGTGCTATCTGCTACTGAACGGCGAGCTGCCAACCGCCGAGCAGAAAGCCCAGTTCGTTGTTGTCGTGAAAAACCACACCATGGTTCACGAACAGCTCAAGACCTTTTTCAACGGCTTCCGCCGCGACGCTCACCCGATGGCGGTGATGTGTGGTGTGGTAGGTGCCCTCTCG…
183	CSZ0328	FRA	Snowpack	KJ878252		Berge et al., 2014	GAGGGCGCTGCCCCCGTCGAGCTGCCCATTCTCACCGGCACCGTAGGCCCCGACGTGATCGACGTACGTGGTCTCACAGCCACCGGCCGCTTCACATTCGACCCAGGCTTCATGTCGACCGCCTCTTGCGAGTCGAAGATCACCTACATTGATGGTGACAACGGGATCCTGCTGCACCGCGGCTATCCGATCGAACAACTGGCCGAGCAATCGGACTACCTGGAAACGTGCTATCTGCTACTGAACGGCGAGCTGCCAACCGCCGAGCAGAAAGCCCAGTTCGTTGTTGTCGTGAAAAACCACACCATGGTTCACGAACAGCTCAAGACCTTTTTCAACGGCTTCCGCCGCGACGCTCACCCGATGGCGGTGATGTGTGGTGTGGTAGGTGCCCTCTCG…
183	UB0246	FRA	Freshwater	AVEQ00000000		Berge et al., 2014	ATGGCTGATAATAAAGCGCAGTTGATCATCGAGGGCGCAGCCCCCGTCGAGCTGCCCATTCTCACCGGCACCGTAGGCCCCGACGTGATCGACGTACGTGGTCTCACAGCCACCGGCCGCTTCACATTCGACCCAGGCTTCATGTCGACCGCCTCTTGCGAGTCGAAGATCACCTACATTGATGGTGACAACGGGATCCTGCTGCACCGCGGCTATCCGATCGAACAACTGGCCGAGCAATCGGACTACCTGGAAACGTGCTATCTGCTACTGAACGGCGAGCTGCCAACCGCCGAGCAGAAAGCCCAGTTCGTTGTTGTCGTGAAAAACCACACCATGGTTCACGAACAGCTCAAGACCTTTTTCAACGGCTTCCGCCGCGACGCTCACCCGATGGCG…
184	CSZ0313	FRA	Snowpack	KJ878238		Berge et al., 2014	GAGGGCGCTGCCCCCGTCGAGCTGCCCATTCTCACCGGCACCGTAGGCCCCGACGTGATCGACGTACGTGGTCTCACAGCCACCGGCCGCTTCACATTCGACCCAGGCTTCATGTCGACCGCCTCTTGCGAGTCGAAGATCACCTACATTGATGGTGACAACGGGATCCTGCTGCACCGCGGCTATCCGATCGAACAACTGGCCGAGCAATCGGACTATCTGGAAACGTGCTATCTGCTGCTGAACGGCGAACTGCCAACCGCCGAGCAGAAAGCCCAGTTCGTTGTTGTCGTGAAGAACCACACCATGGTTCACGAACAGCTCAAGACCTTTTTCAACGGCTTCCGCCGCGACGCTCACCCGATGGCGGTGATGTGTGGGGTGGTGGGTGCCCTCTCG…
184	CSZ0324	FRA	Snowpack	KJ878248		Berge et al., 2014	GAGGGCGCTGCCCCCGTCGAGCTGCCCATTCTCACCGGCACCGTAGGCCCCGACGTGATCGACGTACGTGGTCTCACAGCCACCGGCCGCTTCACATTCGACCCAGGCTTCATGTCGACCGCCTCTTGCGAGTCGAAGATCACCTACATTGATGGTGACAACGGGATCCTGCTGCACCGCGGCTATCCGATCGAACAACTGGCCGAGCAATCGGACTATCTGGAAACGTGCTATCTGCTGCTGAACGGCGAACTGCCAACCGCCGAGCAGAAAGCCCAGTTCGTTGTTGTCGTGAAGAACCACACCATGGTTCACGAACAGCTCAAGACCTTTTTCAACGGCTTCCGCCGCGACGCTCACCCGATGGCGGTGATGTGTGGGGTGGTGGGTGCCCTCTCG…
184	CSZ0385	FRA	Freshwater	KJ878263		Berge et al., 2014	GCCCCCGTCGAGCTGCCCATTCTCACCGGCACCGTAGGCCCCGACGTGATCGACGTACGTGGTCTCACAGCCACCGGCCGCTTCACATTCGACCCAGGCTTCATGTCGACCGCCTCTTGCGAGTCGAAGATCACCTACATTGATGGTGACAACGGGATCCTGCTGCACCGCGGCTATCCGATCGAACAACTGGCCGAGCAATCGGACTATCTGGAAACGTGCTATCTGCTGCTGAACGGCGAACTGCCAACCGCCGAGCAGAAAGCCCAGTTCGTTGTTGTCGTGAAGAACCACACCATGGTTCACGAACAGCTCAAGACCTTTTTCAACGGCTTCCGCCGCGACGCTCACCCGATGGCGGTGATGTGTGGGGTGGTGGGTGCCCTCTCGGCGTTCTAT…
185	CCE0636	FRA	Leaf_litter	KJ877990		Berge et al., 2014	GTGATCGACGTACGTGGTCTCACAGCCACCGGCCGCTTCACATTCGACCCAGGCTTCATGTCGACCGCCTCTTGCGAGTCGAAGATCACCTACATTGATGGTGACAACGGGATCCTGCTGCACCGCGGCTATCCGATCGAACAACTGGCCGAGCAATCGGACTATCTGGAAACCTGCTATCTGCTGCTGAACGGCGAACTGCCAACCGCCGAGCAGAAAGCCCAGTTCGTTGTTGTCGTGAAGAACCACACCATGGTTCACGAACAGCTCAAGACCTTCTTCAACGGCTTCCGCCGCGACGCTCACCCGATGGCGGTGATGTGTGGGGTGGTGGGTGCCCTCTCGGCGTTCTATCACGACTCTCTGGACATCAATAATCCACAGCACCGTGAAATCTCG…
185	CCE0675	FRA	Leaf_litter	KJ878006		Berge et al., 2014	TCGACGTACGTGGTCTCACAGCCACCGGCCGCTTCACATTCGACCCAGGCTTCATGTCGACCGCCTCTTGCGAGTCGAAGATCACCTACATTGATGGTGACAACGGGATCCTGCTGCACCGCGGCTATCCGATCGAACAACTGGCCGAGCAATCGGACTATCTGGAAACCTGCTATCTGCTGCTGAACGGCGAACTGCCAACCGCCGAGCAGAAAGCCCAGTTCGTTGTTGTCGTGAAGAACCACACCATGGTTCACGAACAGCTCAAGACCTTCTTCAACGGCTTCCGCCGCGACGCTCACCCGATGGCGGTGATGTGTGGGGTGGTGGGTGCCCTCTCGGCGTTCTATCACGACTCTCTGGACATCAATAATCCACAGCACCGTGAAATCTCGGCCA…
185	CCV0100	FRA	Freshwater	KJ878053		Berge et al., 2014	GCCCCCGTCGAGCTGCCCATTCTCACCGGCACCGTAGGCCCCGACGTGATCGACGTACGTGGTCTCACAGCCACCGGCCGCTTCACATTCGACCCAGGCTTCATGTCGACCGCCTCTTGCGAGTCGAAGATCACCTACATTGATGGTGACAACGGGATCCTGCTGCACCGCGGCTATCCGATCGAACAACTGGCCGAGCAATCGGACTATCTGGAAACCTGCTATCTGCTGCTGAACGGCGAACTGCCAACCGCCGAGCAGAAAGCCCAGTTCGTTGTTGTCGTGAAGAACCACACCATGGTTCACGAACAGCTCAAGACCTTCTTCAACGGCTTCCGCCGCGACGCTCACCCGATGGCGGTGATGTGTGGGGTGGTGGGTGCCCTCTCGGCGTTCTAT…
186	CCE0668	FRA	Leaf_litter	KJ878005		Berge et al., 2014	CGACGTACGTGGTCTCACAGCCACCGGCCGCTTCACATTCGACCCAGGCTTCATGTCGACCGCCTCTTGCGAGTCGAAGATCACCTACATTGATGGTGACAACGGGATCCTGCTGCACCGCGGCTATCCGATCGAACAACTGGCCGAGCAATCGGACTATCTGGAAACCTGCTATCTGCTGCTGAACGGCGAACTGCCAACCGCCGAGCAGAAAGCCCAGTTCGTTGTTGTCGTGAAGAACCACACCATGGTTCACGAACAGCTCAAGACCTTCTTCAACGGCTTCCGCCGCGACGCTCACCCGATGGCGGTGATGTGTGGTGTGGTGGGTGCCCTCTCGGCGTTCTATCACGACTCTCTGGACATCAATAATCCACAGCACCGTGAAATCTCGGCCAT…
186	CCE0681	FRA	Leaf_litter	KJ878009		Berge et al., 2014	GAGGGCGCTGCCCCCGTCGAGCTGCCCATTCTCACCGGCACCGTAGGCCCCGACGTGATCGACGTACGTGGTCTCACAGCCACCGGCCGCTTCACATTCGACCCAGGCTTCATGTCGACCGCCTCTTGCGAGTCGAAGATCACCTACATTGATGGTGACAACGGGATCCTGCTGCACCGCGGCTATCCGATCGAACAACTGGCCGAGCAATCGGACTATCTGGAAACCTGCTATCTGCTGCTGAACGGCGAACTGCCAACCGCCGAGCAGAAAGCCCAGTTCGTTGTTGTCGTGAAGAACCACACCATGGTTCACGAACAGCTCAAGACCTTCTTCAACGGCTTCCGCCGCGACGCTCACCCGATGGCGGTGATGTGTGGTGTGGTGGGTGCCCTCTCG…
187	CCE0237	FRA	Freshwater	KJ877964		Berge et al., 2014	GCCCCCGTCGAGCTGCCCATTCTCACCGGCACCGTAGGCCCCGACGTGATCGACGTACGTGGTCTCACAGCCACCGGCCGCTTCACATTCGACCCAGGCTTCATGTCGACCGCCTCTTGCGAGTCGAAGATCACCTACATTGATGGTGACAACGGGATCCTGCTGCACCGCGGTTATCCGATCGAACAACTGGCCGAGCAATCGGACTATCTGGAAACCTGCTATCTGCTGCTGAACGGCGAACTGCCAACCGCCGAGCAGAAAGCCCAGTTCGTTGTTGTCGTGAAGAACCACACCATGGTTCACGAACAGCTCAAGACCTTCTTCAACGGCTTCCGCCGCGACGCTCACCCGATGGCGGTGATGTGTGGTGTGGTGGGTGCCCTCTCGGCGTTCTAT…
187	CCE0676	FRA	Leaf_litter	KJ878007		Berge et al., 2014	GGTCTCACAGCCACCGGCCGCTTCACATTCGACCCAGGCTTCATGTCGACCGCCTCTTGCGAGTCGAAGATCACCTACATTGATGGTGACAACGGGATCCTGCTGCACCGCGGTTATCCGATCGAACAACTGGCCGAGCAATCGGACTATCTGGAAACCTGCTATCTGCTGCTGAACGGCGAACTGCCAACCGCCGAGCAGAAAGCCCAGTTCGTTGTTGTCGTGAAGAACCACACCATGGTTCACGAACAGCTCAAGACCTTCTTCAACGGCTTCCGCCGCGACGCTCACCCGATGGCGGTGATGTGTGGTGTGGTGGGTGCCCTCTCGGCGTTCTATCACGACTCTCTGGACATCAATAATCCACAGCACCGTGAAATCTCGGCCATCCGTCTGGTC…
187	CCE0677	FRA	Leaf_litter	KJ878008		Berge et al., 2014	TGATCGACGTACGTGGTCTCACAGCCACCGGCCGCTTCACATTCGACCCAGGCTTCATGTCGACCGCCTCTTGCGAGTCGAAGATCACCTACATTGATGGTGACAACGGGATCCTGCTGCACCGCGGTTATCCGATCGAACAACTGGCCGAGCAATCGGACTATCTGGAAACCTGCTATCTGCTGCTGAACGGCGAACTGCCAACCGCCGAGCAGAAAGCCCAGTTCGTTGTTGTCGTGAAGAACCACACCATGGTTCACGAACAGCTCAAGACCTTCTTCAACGGCTTCCGCCGCGACGCTCACCCGATGGCGGTGATGTGTGGTGTGGTGGGTGCCCTCTCGGCGTTCTATCACGACTCTCTGGACATCAATAATCCACAGCACCGTGAAATCTCGG…
187	CCE0950	FRA	Leaf_litter	KJ878035		Berge et al., 2014	TACGTGGTCTCACAGCCACCGGCCGCTTCACATTCGACCCAGGCTTCATGTCGACCGCCTCTTGCGAGTCGAAGATCACCTACATTGATGGTGACAACGGGATCCTGCTGCACCGCGGTTATCCGATCGAACAACTGGCCGAGCAATCGGACTATCTGGAAACCTGCTATCTGCTGCTGAACGGCGAACTGCCAACCGCCGAGCAGAAAGCCCAGTTCGTTGTTGTCGTGAAGAACCACACCATGGTTCACGAACAGCTCAAGACCTTCTTCAACGGCTTCCGCCGCGACGCTCACCCGATGGCGGTGATGTGTGGTGTGGTGGGTGCCCTCTCGGCGTTCTATCACGACTCTCTGGACATCAATAATCCACAGCACCGTGAAATCTCGGCCATCCGTC…
187	CEB0004	FRA	Biofilm	KJ878093		Berge et al., 2014	GCGCAGCCCCCGTCGAGCTGCCCATTCTCACCGGCACCGTAGGCCCCGACGTGATCGACGTACGTGGTCTCACAGCCACCGGCCGCTTCACATTCGACCCAGGCTTCATGTCGACCGCCTCTTGCGAGTCGAAGATCACCTACATTGATGGTGACAACGGGATCCTGCTGCACCGCGGTTATCCGATCGAACAACTGGCCGAGCAATCGGACTATCTGGAAACCTGCTATCTGCTGCTGAACGGCGAACTGCCAACCGCCGAGCAGAAAGCCCAGTTCGTTGTTGTCGTGAAGAACCACACCATGGTTCACGAACAGCTCAAGACCTTCTTCAACGGCTTCCGCCGCGACGCTCACCCGATGGCGGTGATGTGTGGTGTGGTGGGTGCCCTCTCGGCGT…
188	P7W0001	FRA	Groundwater	NA		unpublished collection of authors	GGGCGCTGCCCCCGTCGAGCTGCCAATTCTGACCGGCACCGTAGGTCCCGACGTTATCGACGTACGCGGCCTCACAGCCACCGGCCGCTTCACATTCGACCCAGGCTTCATGTCGACCGCATCATGCGAGTCCAAGATCACCTACATCGACGGTGACAACGGAATCCTGCTACATCGCGGCTACCCGATCGAGCAACTGGCCGAACAGTCGGACTATCTAGAAACCTGCTACCTGCTGCTCAATGGTGAACTGCCCACCGCCGAGCAGAAGGCTCAATTCGTGGTGGTGGTAAAAAACCACACCATGGTTCACGAACAACTGAAGACGTTCTTCAATGGCTTCCGCCGCGATGCTCACCCGATGGCGGTGATGTGCGGTGTAGTGGGTGCCCTCTCGGC…
188	P7W0003	FRA	Groundwater	NA		unpublished collection of authors	GAGGGCGCTGCCCCCGTCGAGCTGCCAATTCTGACCGGCACCGTAGGTCCCGACGTTATCGACGTACGCGGCCTCACAGCCACCGGCCGCTTCACATTCGACCCAGGCTTCATGTCGACCGCATCATGCGAGTCCAAGATCACCTACATCGACGGTGACAACGGAATCCTGCTACATCGCGGCTACCCGATCGAGCAACTGGCCGAACAGTCGGACTATCTAGAAACCTGCTACCTGCTGCTCAATGGTGAACTGCCCACCGCCGAGCAGAAGGCTCAATTCGTGGTGGTGGTAAAAAACCACACCATGGTTCACGAACAACTGAAGACGTTCTTCAATGGCTTCCGCCGCGATGCTCACCCGATGGCGGTGATGTGCGGTGTAGTGGGTGCCCTCTCG…
189	AI0016	NZL	Freshwater	KJ877809		Berge et al., 2014	TGATCGACGTACGCGGTCTCACCGCCACCGGCCGCTTCACATTCGACCCTGGTTTCATGTCGACCGCCTCTTGCGAGTCGAAAATCACCTACATTGATGGTGACAACGGAATTCTGCTGCACCGCGGCTACCCTATCGAGCAACTGGCGCAGCATTCCGATTATCTGGAAACCTGCTACCTGCTACTCAACGGCGAACTGCCGACCGCCGAGCAGAAGGCCCAGTTCGTCGCTGTGGTCAAGAACCACACGATGGTCCACGAACAGCTCAAGACCTTTTTCAACGGTTTCCGTCGCGACGCCCACCCGATGGCGGTCATGTGCGGCGTCGTAGGTGCCCTTTCAGCGTTCTACCACGACTCGCTGGACATCAATAACCCTCAGCACCGCGAAATTTCGG…
189	AI0045	NZL	Freshwater	KJ877816		Berge et al., 2014	TGATCGACGTACGCGGTCTCACCGCCACCGGCCGCTTCACATTCGACCCTGGTTTCATGTCGACCGCCTCTTGCGAGTCGAAAATCACCTACATTGATGGTGACAACGGAATTCTGCTGCACCGCGGCTACCCTATCGAGCAACTGGCGCAGCATTCCGATTATCTGGAAACCTGCTACCTGCTACTCAACGGCGAACTGCCGACCGCCGAGCAGAAGGCCCAGTTCGTCGCTGTGGTCAAGAACCACACGATGGTCCACGAACAGCTCAAGACCTTTTTCAACGGTTTCCGTCGCGACGCCCACCCGATGGCGGTCATGTGCGGCGTCGTAGGTGCCCTTTCAGCGTTCTACCACGACTCGCTGGACATCAATAACCCTCAGCACCGCGAAATTTCGG…
outlier	PAO1	?	Human	NC_002516		Berge et al., 2014	ATGGCTGACAAAAAAGCGCAGTTGATCATCGAGGGCTCAGCCCCCGTCGAACTGCCCGTCCTATCCGGTACCATGGGTCCCGATGTAGTGGATGTACGGGGCCTCACCGCCACGGGCCACTTCACCTTCGATCCTGGCTTCATGTCGACCGCCTCCTGCGAGTCGAAGATCACCTATATCGACGGCGACAAAGGCGTCCTCCTCCATCGCGGCTACCCCATCGAGCAACTGGCAGAGAAATCCGACTACCTGGAAACCTGCTACCTGCTGCTGAACGGCGAGCTGCCCACCGCCGCGCAGAAGGAACAGTTCGTCGGCACCATCAAGAACCACACCATGGTTCACGAGCAGTTGAAGACCTTCTTCAACGGCTTCCGCCGCGACGCCCACCCGATGGCC…
outlier	Pf-5	USA	Plant	NC_004129		Berge et al., 2014	ATGGCTGACAAAAAAGCGCAGTTGATCATCGAGGGCGCAGCCCCCGTCGAGCTGCCCATTTTAACCGGCACCGTTGGTCCCGATGTAATCGATGTTCGGGGTCTGACGGCCACGGGCCGCTTCACTTTTGACCCGGGTTTCATGTCGACCGCCTCCTGCGAGTCGAAAATCACCTACATCGACGGCGACAACGGCATTCTGCTGCATCGCGGCTACCCGATCGAACAGCTGGCCGAGAAATCCGACTACCTGGAAACCTGCTACCTGCTGCTCAACGGTGAATTGCCCACCGCCGAACAGAAGGCCCAGTTCGTCAGCACCGTGAAAAACCACACCATGGTTCACGAGCAGTTGAAGAGCTTCTTCAACGGTTTCCGCCGCGACGCCCACCCAATGGCG…
P.graminis1	13B3	FRA	Cloud	KJ877796		Berge et al., 2014	GGGCGCTGCCCCCGTCGAGCTGCCCATTCTGACCGGCACCGTTGGTCCCGATGTTATCGACGTACGCGGCCTGACTGCCACCGGACGCTTCACATTCGACCCAGGCTTCATGTCCACCGCCTCATGCGAATCCAAGATCACCTACATCGACGGTGACAACGGCATTCTTCTGCATCGCGGCTACCCGATCGAACAGCTGGCCGAGCAATCGGACTACCTGGAAACCTGCTACCTGCTGCTTAACGGCGAACTGCCAACCGCCGAGCAAAAAGCCGAATTCGTCGTCACCGTGAAGAATCACACCATGGTGCACGAGCAACTGAAGACCTTCTTCAACGGTTTCCGTCGCGACGCCCACCCGATGGCCGTCATGTGCGGTGTGGTCGGCGCCCTGTCGGC…
P.graminis2	38B9	FRA	Cloud	KJ877797		Berge et al., 2014	TGCCCCCGTCGAGCTGCCCATTCTGACCGGCACCGTTGGTCCCGATGTTATCGACGTACGCGGCCTGACTGCCACCGGACGCTTCACATTCGACCCAGGCTTCATGTCCACCGCTTCATGCGAATCGAAGATCACCTACATCGATGGTGACAACGGCATTCTCCTGCATCGCGGCTACCCGATCGAACAGCTGGCCGAGCAATCGGACTACCTGGAAACCTGCTACCTGCTGCTCAACGGCGAACTGCCGACCGCCGAGCAAAAGGCCGAATTCGTCGTCACCGTGAAGAATCACACCATGGTGCACGAGCAACTCAAGACCTTCTTCAACGGTTTCCGTCGCGACGCCCACCCGATGGCCGTCATGTGTGGCGTGGTCGGTGCCCTCTCGGCGTTCTA…
singleton	508	USA	Plant	KJ877794		Berge et al., 2014	CACCGGCCGCTTCACATTTGACCCTGGCTTCATGTCCACGGCCTCTTGCGATTCGAAGATCACCTACATCGACGGTGACAATGGCATTCTGCTGCACCGCGGCTATCCGATCGAACAACTGGCCGAGCAGTCCGACTACCTGGAAACCTGCTACCTGCTGCTCAACGGCGAACTGCCCACCGCCGAGCAGAAAGCCCAGTTCGTGGCCGTGGTCAAGAACCACACGATGGTTCACGAACAGCTCAAGACCTTTTTCAACGGTTTCCGCCGTGACGCCCACCCGATGGCCGTCATGTGTGGTGTAGTCGGCGCCCTGTCAGCGTTCTACCACGACTCCCTGGACATCAATAACCCGCAGCACCGCGAGATTTCCGCGGTCCGCCTGGTTGCCAAGATGCC…
singleton	36_1	JPN	Plant	NA	http://genome.ppws.vt.edu/cgi-bin/MLST/home.pl	Berge et al., 2014	ATGGCTGACAAAAAAGCGCAGTTGATCATCGAGGGCGCAGCCCCCGTCGAGCTGCCAATTCTGACCGGTACAGTGGGTCCGGACGTGATCGACGTACGCGGACTGACCGCCACCGGCCGCTTCACATTTGACCCTGGCTTCATGTCCACGGCATCTTGCGAGTCGAAGATCACCTACATCGATGGTGACAATGGAATCCTGCTTCACCGCGGCTACCCTATCGAACAACTGGCCGAGCAGTCCGATTACCTCGAAACCTGTTACCTGCTGCTCAACGGCGAATTGCCGACCGCCGAACAGAAAGCCCAGTTTGTGGCCGTGGTCAAGAACCACACGATGGTTCACGAGCAACTCAAGACATTTTTCAACGGCTTCCGCCGCGATGCCCACCCGATGGCC…
singleton	83.1	USA	Plant	KJ877799		Berge et al., 2014	CCCCCGTCGAGCTGCCTATACTGACCGGCACCGTGGGTCCTGACGTGATCGACGTGCGCGGACTGACCGCCACCGGCCGCTTCACATTCGACCCTGGCTTCATGTCGACCGCCTCTTGCGAGTCGAAGATCACCTACATTGATGGTGACAATGGCATTCTGCTGCACCGCGGTTATCCGATCGAGCAACTGGCCGAACAGTCCGATTATCTGGAAACCTGCTACCTTCTGCTCAACGGCGAATTGCCGACCAGCGAACAGAAAGCCCAGTTCGTTGCCGTGGTCAAGAACCACACCATGGTTCACGAACAGCTGAAGAGCTTCTTCAACGGCTTCCGCCGCGACGCCCACCCGATGGCTGTCATGTGCGGCGTGGTTGGTGCCCTGTCCGCGTTCTACC…
singleton	AI0027	NZL	Freshwater	KJ877812		Berge et al., 2014	CATTCTGACCGGTACAGTGGGTCCGGACGTGATCGACGTACGCGGCCTGACCGCCACCGGCCGCTTCACATTTGACCCTGGTTTCATGTCCACGGCCTCTTGCGATTCGAAGATCACCTACATCGATGGTGATAATGGCATTCTGCTACACCGCGGCTACCCGATCGAACAACTGGCCGAGCAGTCCGACTATCTCGAAACCTGCTACCTGCTGCTCAACGGTGAACTGCCCACCGCCGAGCAGAAAGCCCAGTTCGTGGCCGTGGTCAAGAACCACACGATGGTTCACGAACAGCTCAAGACCTTTTTCAACGGCTTCCGCCGCGACGCCCACCCGATGGCCGTCATGTGTGGCGTAGTCGGCGCCCTGTCAGCGTTCTACCACGACTCACTGGACAT…
singleton	AI0041	NZL	Freshwater	KJ877814		Berge et al., 2014	CGACGTACGCGGTCTCACCGCCACCGGCCGCTTCACATTCGACCCTGGTTTCATGTCGACCGCCTCTTGCGAGTCGAAAATCACCTACATTGATGGTGACAACGGAATTCTGCTGCACCGCGGCTACCCTATCGAGCAACTGGCGCAGCATTCCGATTATCTGGAAACCTGCTACCTGCTGCTCAACGGCGAACTGCCGACCGCCGAGCAGAAAGCCCAGTTCGTCGCTGTGGTCAAGAACCACACGATGGTCCACGAACAGCTCAAGACCTTTTTCAACGGTTTCCGTCGCGACGCCCACCCGATGGCGGTCATGTGCGGCGTTGTAGGTGCCCTTTCAGCGTTCTACCACGACTCGCTGGACATCAATAACCCTCAGCACCGCGAAATTTCGGCAGT…
singleton	AI0042	NZL	Freshwater	KJ877815		Berge et al., 2014	CATTCTGACCGGTACAGTGGGTCCGGACGTGATCGACGTACGCGGCCTGACCGCCACCGGCCGCTTCACATTTGACCCTGGTTTCATGTCCACGGCCTCTTGCGATTCGAAGATCACCTACATCGATGGTGATAATGGCATTCTGCTACACCGCGGCTACCCGATCGAACAACTGGCCGAGCAGTCCGACTACCTCGAAACCTGCTACCTGCTGCTCAACGGTGAACTGCCTACCGCCGAGCAGAAAGCCCAGTTCGTGGCCGTGGTCAAGAACCACACGATGGTTCACGAACAGCTCAAGACCTTTTTCAACGGTTTCCGCCGCGACGCCCACCCGATGGCCGTCATGTGTGGCGTAGTCGGCGCCCTGTCAGCGTTCTATCACGACTCGCTGGACAT…
singleton	AI0053	NZL	Freshwater	KJ877818		Berge et al., 2014	ATCGACGTACGCGGCCTGACCGCCACCGGCCGCTTCACATTTGACCCTGGCTTCATGTCCACGGCCTCTTGCGATTCGAAGATCACCTACATCGATGGTGATAATGGCATTCTGCTGCACCGCGGCTACCCGATCGAACAACTGGCCGAGCAGTCCGACTACCTGGAAACCTGCTACCTGCTGCTCAACGGTGAACTGCCCACCGCCGAGCAGAAAGCCCAGTTCGTGGCCGTGGTCAAGAACCACACGATGGTTCACGAACAGCTCAAGACCTTTTTCAACGGTTTCCGCCGTGACGCCCACCCGATGGCCGTCATGTGTGGTGTAGTCGGCGCCCTGTCAGCGTTCTACCACGACTCTCTGGACATCAATAACCCGCAGCACCGCGAGATTTCCGCG…
singleton	AI0089	NZL	Freshwater	KJ877831		Berge et al., 2014	CCGGTAAGTGGGTCCGGACGTGATCGACGTACGCGGTCTGACCGCCACCGGCCGCTTCACATTTGACCCTGGCTTCATGTCCACGGCCTCTTGCGAGTCGAAGATCACCTACATTGATGGTGACAACGGAATTCTGCTGCACCGCGGCTACCCGATCGAACAACTGGCCGAGCAGTCCGATTACCTCGAGACCTGCTACCTGTTGCTCAACGGCGAGCTGCCAACCGCCGAACAGAAAGCCCAGTTCGTGGCCGTGGTCAAGAACCACACGATGGTTCACGAACAACTCAAGACCTTCTTCAACGGCTTTCGCCGTGACGCCCACCCGATGGCCGTCATGTGCGGTGTAGTCGGCGCCCTGTCGGCGTTCTACCACGATTCGCTGGACATCAATAACCC…
singleton	BS0001	ITA	Plant	KJ877840		Berge et al., 2014	TCCCGTCGAAGCTGCCAATATTGCTGACCGGTACAGTGGGTCCGGACGTGATCGACGTACGCGGTCTCACCGCCACCGGCCGCTTCACATTCGACCCTGGCTTCATGTCGACCGCCTCTTGCGAGTCGAAGATCACCTACATCGATGGTGACAACGGAATCCTGCTGCACCGCGGCTACCCTATCGAACAACTGGCCCAGCACTCCGACTACCTGGAGACCTGCTACCTGCTGCTCAACGGCGAACTGCCGACCGCCGAGCAGAAAGCCCAGTTCGTCGCCGTGGTCAAGAACCACACGATGGTCCACGAACAGCTCAAGACCTTTTTCAACGGCTTCCGTCGCGACGCCCACCCGATGGCCGTCATGTGCGGCGTGGTCGGCGCCCTTTCAGCGTTCT…
singleton	CC1434	FRA	Biofilm	KJ877875		Berge et al., 2014	CGACGTACGCGGCCTGACCGCCACCGGCCGCTTCACATTTGACCCTGGTTTCATGTCCACGGCCTCTTGCGATTCGAAGATCACCTACATCGATGGTGATAATGGCATTCTGCTACACCGCGGCTACCCGATCGAACAACTGGCCGAGCAGTCCGACTATCTCGAAACCTGCTACCTGCTGCTCAACGGTGAACTGCCCACCGCCGAGCAGAAAGCCCAGTTCGTGGCCGTGGTCAAGAACCACACGATGGTTCACGAACAGCTCAAGACCTTTTTCAACGGTTTCCGCCGCGACGCCCACCCGATGGCCGTCATGTGTGGCGTAGTCGGCGCCCTGTCAGCGTTCTACCACGACTCACTGGACATCAATAACCCGCAGCACCGCGAGATTTCTGCGGT…
singleton	CC1532	FRA	Freshwater	KJ877899		Berge et al., 2014	CGTGATCGACGTACGCGGTCTCACCGCCACCGGCCGCTTCACATTCGACCCTGGTTTCATGTCGACCGCCTCTTGCGAGTCGAAAATCACCTACATTGATGGTGACAACGGAATTCTGCTGCACCGCGGCTACCCTATCGAGCAACTGGCGCAGCATTCCGATTATCTGGAAACCTGCTACCTGCTACTCAACGGCGAACTGCCGACCGCCGAGCAGAAGGCCCAGTTCGTCGCTGTGGTCAAGAACCACACGATGGTCCACGAACAGCTCAAGACCTTTTTCAACGGTTTCCGTCGCGACGCCCACCCGATGGCGGTCATGTGCGGCGTTGTAGGTGCCCTTTCAGCGTTCTACCACGACTCGCTGGACATCAATAACCCTCAGCACCGCGAAATTTC…
singleton	CC1544	FRA	Freshwater	AVEI00000000		Berge et al., 2014	ATGGCTGACAAAAAAGCGCAGTTGATCATCGAGGGCGCTGCCCCCGTCGAGCTGCCAATACTGACCGGTACAGTGGGTCCGGACGTGATCGACGTACGCGGTCTGACCGCCACCGGCCGCTTCACATTTGACCCTGGTTTCATGTCCACGGCCTCTTGCGAGTCGAAGATCACCTACATTGATGGTGACAACGGAATTCTGCTGCACCGCGGCTACCCGATCGAACAACTGGCCGAGCAGTCCGATTACCTCGAGACCTGCTACCTGTTGCTCAACGGCGAGCTGCCAACCGCCGAACAGAAAGCCCAGTTCGTGGCCGTGGTCAAGAACCACACGATGGTTCACGAACAACTCAAGACCTTCTTCAACGGCTTTCGCCGTGACGCCCACCCGATGGCC…
singleton	CC1586	USA	Freshwater	KJ877902		Berge et al., 2014	GAGGGCGCTGCCCCCGTCGAGCTGCCAATTCTGACGGGTACAGTGGGTCCGGACGTGATCGACGTACGCGGTCTCACCGCCACCGGCCGCTTCACATTTGACCCTGGCTTCATGTCCACGGCATCTTGCGAGTCGAAGATCACCTACATCGATGGTGATAACGGAATCCTGCTTCACCGCGGCTACCCGATCGAACAACTGGCCGAGCAGTCCGATTATCTGGAAACCTGCTACCTGCTGCTCAATGGCGAATTGCCGACCGCGGAGCAAAAAGCCCAGTTCGTTGCCGTGGTCAAAAACCACACAATGGTTCACGAACAGCTCAAGACCTTTTTCAACGGCTTCCGCCGTGATGCCCACCCGATGGCCGTCATGTGCGGCGTAGTCGGCGCCCTGTCG…
singleton	CCE0045	FRA	Snowpack	KJ877915		Berge et al., 2014	AACGTGATCGACGTACGCGGCATGACCGCCACCGGCCGCTTCACATTTGACCCAGGTTTCATGTCCACGGCCTCTTGCGATTCGAAGATCACCTACATCGATGGTGATAATGGCATTCTGGTACACCGCGGCTACCCGATCGAACAACTGGCCGAGCAGTCCGACTACCTCGAAACCTGGTACCTGCTGCTCAACGGTGAACTGCCCACCGCCGAGCAGAAAGCCCAGTTCGTGGCCGTGGTCAAGAACCACACGATGGTTCACGAACAGCTCAAGACTTTTTTCAACGGTTTCCGCCGCGACGCCCACCCGATGGCCGTCATGTGTGGCGTAGTCGGCGCCCTGTCAGCGTTCTACCACGACTCGCTGGACATCAATAACCCGCAGCACCGCGAGATT…
singleton	CCE0075	FRA	Freshwater	KJ877921		Berge et al., 2014	GCCCCCGTCGAGCTGCCAATTCTGACGGGTACAGTGGGTCCGGACGTGATCGACGTACGCGGTCTCACCGCCACCGGCCGCTTCACATTTGACCCTGGCTTCATGTCCACGGCATCTTGCGAGTCGAAGATCACCTACATCGATGGTGATAACGGAATCCTGCTTCACCGCGGCTACCCGATCGAGCAACTGGCCGAGCAGTCCGATTATCTGGAAACCTGCTACCTGCTGCTCAATGGCGAACTGCCAACTGCCGAGCAGAAAGACCAGTTCGTTGCCGTGGTCAAGAACCACACGATGGTTCACGAACAGCTCAAGACCTTTTTTAACGGCTTCCGCCGTGATGCCCACCCGATGGCCGTCATGTGCGGCGTGGTCGGTGCCCTGTCGGCGTTCTAT…
singleton	CCE0118	FRA	Freshwater	KJ877933		Berge et al., 2014	GCCCCCGTCGAGCTGCCCATTCTCACCGGCACCGTAGGCCCCGACGTGATCGACGTACGTGGTCTCACAGCCACCGGCCGCTTCACATTCGACCCAGGCTTCATGTCGACCGCCTCTTGCGAGTCGAAGATCACCTATATTGATGGTGACAACGGGATCCTGCTGCACCGCGGCTATCCGATCGAACAACTGGCCGAGCAATCGGACTATCTGGAAACCTGCTATCTGCTGCTGAACGGCGAACTGCCAACCGCCGAGCAGAAAGCCCAGTTCGTTGTTGTCGTGAAGAACCACACCATGGTTCACGAACAGCTCAAGACCTTCTTCAACGGCTTCCGCCGCGACGCTCACCCGATGGCGGTGATGTGTGGTGTGGTGGGTGCCCTCTCGGCGTTCTAT…
singleton	CCE0125	FRA	Freshwater	KJ877934		Berge et al., 2014	GCCCCCGTCGAGCTGCCAATTCTGACGGGTACAGTGGGTCCGGACGTGATCGACGTACGCGGTCTCACCGCCACCGGCCGCTTCACATTTGACCCTGGCTTCATGTCCACGGCATCTTGCGAGTCGAAGATCACCTACATCGATGGTGATAATGGAATCCTGCTTCACCGCGGCTACCCGATCGAGCAACTGGCCGAGCAGTCCGATTATCTGGAAACCTGCTACCTGCTGCTCAATGGCGAACTGCCAACTGCCGAGCAGAAAGCCCAGTTCGTTGCCGTGGTCAAGAACCACACGATGGTTCACGAACAGCTCAAGACCTTTTTCAACGGCTTCCGCCGTGATGCCCACCCGATGGCCGTCATGTGCGGCGTGGTCGGTGCCCTGTCGGCGTTCTAT…
singleton	CCE0126	FRA	Freshwater	KJ877935		Berge et al., 2014	GCCCCCGTCGAGCTGCCAATTCTGACGGGTACAGTGGGTCCGGACGTGATCGACGTACGCGGTCTCACCGCCACCGGCCGCTTCACATTTGACCCTGGCTTCATGTCCACGGCATCTTGCGAGTCGAAGATCACCTACATCGATGGTGATAACGGAATCCTGCTTCACCGCGGCTACCCGATCGAGCAACTGGCCGAGCAGTCCGATTATCTGGAAACCTGCTACCTGCTGCTCAATGGCGAACTGCCAACTGCCGAGCAGAAAGCCCAGTTCGTTGCCGTGGTCAAGAACCACACGATGGTTCACGAACAGCTCAAGACCTTTTTCAACGGCTTCCGCCGTGATGCCCACCCGATGGCCGTCATGTGCGGCGTGGTAGGTGCCCTGTCGGCGTTCTAT…
singleton	CCE0151	FRA	Freshwater	KJ877937		Berge et al., 2014	GCCCCCGTCGAGCTGCCCATTCTCACCGGCACCGTAGGCCCCGACGTGATCGACGTACGCGGTCTCACAGCCACCGGCCGCTTCACATTCGACCCAGGCTTCATGTCGACCGCCTCTTGCGAGTCGAAGATCACCTACATTGATGGTGACAACGGGATCCTGCTGCACCGCGGCTATCCGATCGAACAACTGGCCGAGCAATCGGACTATCTGGAAACCTGCTATCTGCTGCTGAACGGCGAACTGCCAACCGCCGAGCAGAAAGCCCAGTTCGTTGTTGTCGTGAAGAACCACACCATGGTTCACGAACAGCTCAAGACCTTTTTCAACGGCTTCCGCCGCGACGCTCACCCGATGGCGGTGATGTGTGGGGTGGTGGGTGCCCTCTCGGCGTTCTAT…
singleton	CCE0153	FRA	Freshwater	KJ877938		Berge et al., 2014	GCCCCTGTCGAGCTGCCAATTCTGACGGGTACAGTGGGTCCGGACGTGATCGACGTACGCGGTCTCACCGCCACCGGCCGCTTCACATTTGACCCTGGCTTCATGTCCACGGCATCTTGCGAGTCGAAGATCACCTACATCGATGGTGATAACGGAATCCTGCTTCACCGCGGCTACCCGATCGAACAACTGGCCGAGCAGTCCGATTATCTGGAAACCTGCTACCTGCTGCTCAATGGCGAATTGCCAACTGCCGAGCAGAAAGCCCAGTTCGTTGCCGTGGTCAAGAACCACACGATGGTTCACGAACAGCTCAAGACCTTTTTCAACGGCTTCCGCCGTGATGCCCACCCGATGGCCGTCATGTGCGGCGTAGTCGGCGCCCTGTCGGCGTTCTAT…
singleton	CCE0183	FRA	Snowpack	KJ877945		Berge et al., 2014	CTGCTCTGCCAGTTGTTCGATCGGGTAGCCGCGGTGTAGCAGAATGCCATTATCACCATCGATGAAGTTGATCCACGAGGGCGCTGCCCCCGTCGAGCTGCCAATTCTGACCGGTACAGTGGGTCCGGACGTGATCGACGTACGCGGCCTGACCGCCACCGGCCGCTTCACATTTGACCCTGGTTTCATGTCCACGGCCTCTTGCGATTCGAAGATCACCTACATCGATGGTGATAATGGCATTCTGCTACACCGCGGCTACCCGATCGAACAACTGGCCGAGCAGTCCGACTACCTCGAAACATGCTACCTGCTGCTCAACGGTGAACTGCCCACCGCCGAGCAGAAAGCCCAGTTCGTGGCCGTGGTCAAGAACCACACGATGGTTCACGAACAGCT…
singleton	CCE0238	FRA	Freshwater	KJ877965		Berge et al., 2014	GCCCCCGTCGAGCTGCCAATTCTGACGGGTACAGTGGGTCCGGACGTGATCGACGTACGCGGTCTCACCGCCACCGGCCGCTTCACATTTGACCCTGGCTTCATGTCCACGGCATCTTGCGAGTCGAAGATCACCTACATCGATGGTGATAATGGAATCCTGCTTCACCGCGGCTACCCGATCGAGCAACTGGCCGAGCAGTCCGATTATCTGGAAACCTGCTACCTGCTGCTCAATGGCGAACTGCCAACTGCCGAGCAGAAAGCCCAGTTCGTTGCCGTGGTCAAGAACCACACGATGGTTCACGAACAGCTCAAGACCTTTTTCAACGGCTTCCGCCGTGATGCCCACCCGATGGCCGTCATGTGCGGCGTGGTCGGTGCCCTGTCGGCGTTCTAT…
singleton	CCE0641	FRA	Leaf_litter	KJ877992		Berge et al., 2014	CGACGTACGTGGTCTCACAGCCACCGGCCGCTTCACATTCGACCCAGGCTTCATGTCCACCGCCTCTTGCGAGTCGAAGATCACCTACATTGATGGTGACAACGGGATCCTGCTGCACCGCGGCTATCCGATCGAACAACTGGCCGAGCAATCGGACTATCTGGAAACCTGCTATCTGCTGCTGAACGGCGAACTGCCAACCGCCGAGCAGAAAGCCCAGTTCGTTGTTGTCGTGAAGAACCACACCATGGTTCACGAACAGCTCAAGACCTTCTTCAACGGCTTCCGCCGCGACGCTCACCCGATGGCGGTGATGTGTGGGGTGGTGGGTGCCCTCTCGGCGTTCTATCACGACTCTCTGGACATCAATAATCCACAGCACCGTGAAATCTCGGCCAT…
singleton	CCE0667	FRA	Leaf_litter	KJ878004		Berge et al., 2014	TCGACGTACGTGGTCTCACAGCCACCGGCCGCTTCACATTCGACCCAGGCTTCATGTCGACCGCCTCTTGCGAGTCGAAGATCACCTACATTGATGGTGACAACGGGATCCTGCTGCACCGCGGCTATCCGATCGAACAACTGGCCGAGCAATCGGACTACCTGGAAACCTGCTATTTGCTGCTGAACGGCGAACTGCCAACCGCCGAGCAGAAAGCCCAGTTCGTTGTTGTCGTGAAGAACCACACCATGGTTCACGAACAGCTCAAGACCTTCTTCAACGGCTTCCGCCGCGACGCTCACCCGATGGCGGTGATGTGTGGTGTGGTGGGTGCCCTCTCGGCGTTCTATCACGACTCTCTGGACATCAATAATCCACAGCACCGTGAAATCTCGGCCA…
singleton	CCE0915	FRA	Leaf_litter	KJ878031		Berge et al., 2014	TACGTGGTCTCACAGCCACCGGCCGCTTCACATTCGACCCAGGCTTCATGTCGACCGCCTCTTGCGAGTCGAAGATCACCTACATTGATGGTGACAACGGGATCCTGCTGCACCGCGGCTATCCGATCGAACAACTGGCCGAGCAATCGGACTATCTGGAAACCTGCTATCTGCTGCTAAACGGCGAACTGCCAACCGCCGAGCAGAAAGCCCAGTTCGTTGTCGTCGTGAAGAACCACACCATGGTTCACGAACAGCTCAAGACCTTCTTCAACGGCTTCCGCCGCGACGCTCACCCGATGGCGGTGATGTGTGGGGTGGTGGGTGCCCTCTCGGCGTTCTATCACGACTCTCTGGACATCAATAATCCACAGCACCGTGAAATCTCGGCCATCCGTC…
singleton	CCE0918	FRA	Leaf_litter	KJ878032		Berge et al., 2014	ATCGACGTACGCGGTCTCACAGCCACCGGCCGCTTCACATTCGACCCAGGCTTCATGTCGACCGCCTCTTGCGAGTCGAAGATCACCTACATTGATGGTGACAACGGGATCCTGCTGCACCGCGGCTATCCGATCGAACAACTGGCCGAGCAATCGGACTATCTGGAAACCTGCTATCTGCTGCTGAACGGCGAACTGCCAACCGCCGAGCAGAAAGCCCAGTTCGTTGTTGTCGTGAAGAACCACACCATGGTTCACGAACAGCTCAAGACCTTTTTCAACGGCTTCCGCCGCGACGCTCACCCGATGGCGGTGATGTGTGGGGTGGTGGGTGCCCTCTCGGCGTTCTATCACGACTCTCTGGACATCAATAATCCACAGCACCGTGAAATCTCGGCC…
singleton	CCE0968	FRA	Freshwater	KJ878037		Berge et al., 2014	GCCCCCGTCGAGCTGCCAATTCTGACGGGTACAGTGGGTCCGGACGTGATCGACGTACGCGGTCTCACCGCCACCGGCCGCTTCACATTTGACCCTGGCTTCATGTCCACGGCATCTTGCGAGTCGAAGATCACTTACATTGATGGTGATAACGGAATCCTGCTTCACCGCGGCTACCCGATCGAGCAACTGGCCGAGCAGTCCGATTATCTGGAAACCTGCTACCTGCTGCTCAATGGCGAACTGCCAACTGCCGAGCAGAAAGCCCAGTTCGTTGCCGTGGTCAAGAACCACACGATGGTTCACGAACAGCTCAAGACCTTTTTCAACGGCTTCCGCCGTGATGCCCACCCGATGGCCGTCATGTGCGGCGTGGTCGGTGCCCTGTCGGCGTTCTAT…
singleton	CCV0213	FRA	Freshwater	KJ878074		Berge et al., 2014	GCCCCCGTCGAGCTGCCAATTCTGACGGGTACAGTGGGTCCGGACGTGATCGACGTACGCGGTCTCACCGCCACCGGCCGCTTCACATTTGACCCTGGCTTCATGTCCACGGCATCTTGCGAGTCGAAGATCACCTACATTGATGGTGATAACGGAATCCTGCTTCACCGCGGCTACCCGATCGAGCAACTGGCCGAGCAGTCCGATTATCTGGAAACCTGCTACCTGCTGCTCAACGGCGAACTGCCGACTGCCGAGCAGAAAGCGCAGTTCGTTGCTGTGGTCAAGAACCACACGATGGTTCACGAACAGCTCAAGACCTTTTTCAACGGCTTCCGCCGTGATGCCCACCCGATGGCCGTCATGTGCGGCGTGGTCGGCGCCCTGTCGGCGTTCTAT…
[truncated: 76 more rows]
