# Supplementary material for: Pseudomonas syringae on Plants in Iceland Has Likely Evolved for Several Million Years Outside the Reach of Processes That Mix This Bacterial Complex across Earth’s Temperate Zones
Source: Pathogens. 2022 Mar 15;11(3):357. doi: 10.3390/pathogens11030357 (PMC8951587; doi:10.3390/pathogens11030357)
Supplement: Supplementary file 1 [file pathogens-11-00357-s001.zip › Morris_MDPI_IcelandicPs_Suppl_Tab_S2_definitive_21Mar22.xlsx]

## Sheet: SupplTabS2
Supplementary Table S2. Data set for strains of Pseudomonas syringae isolated from vegetation in Iceland for this study. Citrate synthase partial gene sequence (cts) haplotypes are based on alignment of a 343 bp segment for all strains (reference and Icelandic) used in this study.
					Morris et al. Pseudomonas syringae on plants in Iceland has likely evolved for several million years outside the reach of processes that mix this bacterial complex across Earth’s temperate zones. MDPI, submitted Jan 2022.
	cts haplotype	habitat	vegetation type	substrate	year of isolation	strain name
	1	BoreoHeathMossGrass	plant	Alchemilla alpina	2020	HV2005_04	CAATTCTGACGGGTACAGTGGGTCCGGACGTGATCGACGTACGCGGTCTCACCGCCACCGGCCGCTTCACATTCGACCCTGGCTTCATGTCCACGGCATCTTGCGAGTCGAAGATCACCTACATCGATGGCGATAACGGAATCCTGCTTCACCGCGGCTACCCGATCGAACAACTGGCCGAGCAGTCCGATTATCTGGAAACCTGCTACCTGCTGCTCAATGGCGAATTGCCAACAGCCGAGCAGAAAGCCCAGTTCGTTGCCGTGGTCAAGAACCACACGATGGTTCACGAACAGCTCAAGACCTTTTTCAACGGCTTCCGTCGTGATGCCCACCCGATGGCCGTCATGTGCGGCGTAGTCGGCGCCC
	1	BoreoHeathMossGrass	plant	Alchemilla alpina	2020	HV2005_08	CAATTCTGACGGGTACAGTGGGTCCGGACGTGATCGACGTACGCGGTCTCACCGCCACCGGCCGCTTCACATTCGACCCTGGCTTCATGTCCACGGCATCTTGCGAGTCGAAGATCACCTACATCGATGGCGATAACGGAATCCTGCTTCACCGCGGCTACCCGATCGAACAACTGGCCGAGCAGTCCGATTATCTGGAAACCTGCTACCTGCTGCTCAATGGCGAATTGCCAACAGCCGAGCAGAAAGCCCAGTTCGTTGCCGTGGTCAAGAACCACACGATGGTTCACGAACAGCTCAAGACCTTTTTCAACGGCTTCCGTCGTGATGCCCACCCGATGGCCGTCATGTGCGGCGTAGTCGGCGCCC
	1	BoreoHeathMossGrass	plant	Alchemilla alpina	2020	HV2005_14	CAATTCTGACGGGTACAGTGGGTCCGGACGTGATCGACGTACGCGGTCTCACCGCCACCGGCCGCTTCACATTCGACCCTGGCTTCATGTCCACGGCATCTTGCGAGTCGAAGATCACCTACATCGATGGCGATAACGGAATCCTGCTTCACCGCGGCTACCCGATCGAACAACTGGCCGAGCAGTCCGATTATCTGGAAACCTGCTACCTGCTGCTCAATGGCGAATTGCCAACAGCCGAGCAGAAAGCCCAGTTCGTTGCCGTGGTCAAGAACCACACGATGGTTCACGAACAGCTCAAGACCTTTTTCAACGGCTTCCGTCGTGATGCCCACCCGATGGCCGTCATGTGCGGCGTAGTCGGCGCCC
	1	BoreoHeathMossGrass	plant	Alchemilla alpina	2020	HV2005_24	CAATTCTGACGGGTACAGTGGGTCCGGACGTGATCGACGTACGCGGTCTCACCGCCACCGGCCGCTTCACATTCGACCCTGGCTTCATGTCCACGGCATCTTGCGAGTCGAAGATCACCTACATCGATGGCGATAACGGAATCCTGCTTCACCGCGGCTACCCGATCGAACAACTGGCCGAGCAGTCCGATTATCTGGAAACCTGCTACCTGCTGCTCAATGGCGAATTGCCAACAGCCGAGCAGAAAGCCCAGTTCGTTGCCGTGGTCAAGAACCACACGATGGTTCACGAACAGCTCAAGACCTTTTTCAACGGCTTCCGTCGTGATGCCCACCCGATGGCCGTCATGTGCGGCGTAGTCGGCGCCC
	1	BoreoHeathMossGrass	plant	Salix herbacea	2020	HV2009_01	CAATTCTGACGGGTACAGTGGGTCCGGACGTGATCGACGTACGCGGTCTCACCGCCACCGGCCGCTTCACATTCGACCCTGGCTTCATGTCCACGGCATCTTGCGAGTCGAAGATCACCTACATCGATGGCGATAACGGAATCCTGCTTCACCGCGGCTACCCGATCGAACAACTGGCCGAGCAGTCCGATTATCTGGAAACCTGCTACCTGCTGCTCAATGGCGAATTGCCAACAGCCGAGCAGAAAGCCCAGTTCGTTGCCGTGGTCAAGAACCACACGATGGTTCACGAACAGCTCAAGACCTTTTTCAACGGCTTCCGTCGTGATGCCCACCCGATGGCCGTCATGTGCGGCGTAGTCGGCGCCC
	1	BoreoHeathMossGrass	plant	Salix herbacea	2020	HV2009_03	CAATTCTGACGGGTACAGTGGGTCCGGACGTGATCGACGTACGCGGTCTCACCGCCACCGGCCGCTTCACATTCGACCCTGGCTTCATGTCCACGGCATCTTGCGAGTCGAAGATCACCTACATCGATGGCGATAACGGAATCCTGCTTCACCGCGGCTACCCGATCGAACAACTGGCCGAGCAGTCCGATTATCTGGAAACCTGCTACCTGCTGCTCAATGGCGAATTGCCAACAGCCGAGCAGAAAGCCCAGTTCGTTGCCGTGGTCAAGAACCACACGATGGTTCACGAACAGCTCAAGACCTTTTTCAACGGCTTCCGTCGTGATGCCCACCCGATGGCCGTCATGTGCGGCGTAGTCGGCGCCC
	1	BoreoHeathMossGrass	plant	Salix herbacea	2020	HV2009_15	CAATTCTGACGGGTACAGTGGGTCCGGACGTGATCGACGTACGCGGTCTCACCGCCACCGGCCGCTTCACATTCGACCCTGGCTTCATGTCCACGGCATCTTGCGAGTCGAAGATCACCTACATCGATGGCGATAACGGAATCCTGCTTCACCGCGGCTACCCGATCGAACAACTGGCCGAGCAGTCCGATTATCTGGAAACCTGCTACCTGCTGCTCAATGGCGAATTGCCAACAGCCGAGCAGAAAGCCCAGTTCGTTGCCGTGGTCAAGAACCACACGATGGTTCACGAACAGCTCAAGACCTTTTTCAACGGCTTCCGTCGTGATGCCCACCCGATGGCCGTCATGTGCGGCGTAGTCGGCGCCC
	1	BoreoHeathMossGrass	plant	Salix herbacea	2020	HV2009_16	CAATTCTGACGGGTACAGTGGGTCCGGACGTGATCGACGTACGCGGTCTCACCGCCACCGGCCGCTTCACATTCGACCCTGGCTTCATGTCCACGGCATCTTGCGAGTCGAAGATCACCTACATCGATGGCGATAACGGAATCCTGCTTCACCGCGGCTACCCGATCGAACAACTGGCCGAGCAGTCCGATTATCTGGAAACCTGCTACCTGCTGCTCAATGGCGAATTGCCAACAGCCGAGCAGAAAGCCCAGTTCGTTGCCGTGGTCAAGAACCACACGATGGTTCACGAACAGCTCAAGACCTTTTTCAACGGCTTCCGTCGTGATGCCCACCCGATGGCCGTCATGTGCGGCGTAGTCGGCGCCC
	1	BoreoHeathMossGrass	plant	Salix herbacea	2020	HV2009_17	CAATTCTGACGGGTACAGTGGGTCCGGACGTGATCGACGTACGCGGTCTCACCGCCACCGGCCGCTTCACATTCGACCCTGGCTTCATGTCCACGGCATCTTGCGAGTCGAAGATCACCTACATCGATGGCGATAACGGAATCCTGCTTCACCGCGGCTACCCGATCGAACAACTGGCCGAGCAGTCCGATTATCTGGAAACCTGCTACCTGCTGCTCAATGGCGAATTGCCAACAGCCGAGCAGAAAGCCCAGTTCGTTGCCGTGGTCAAGAACCACACGATGGTTCACGAACAGCTCAAGACCTTTTTCAACGGCTTCCGTCGTGATGCCCACCCGATGGCCGTCATGTGCGGCGTAGTCGGCGCCC
	1	BoreoHeathMossGrass	plant	Salix herbacea	2020	HV2009_18	CAATTCTGACGGGTACAGTGGGTCCGGACGTGATCGACGTACGCGGTCTCACCGCCACCGGCCGCTTCACATTCGACCCTGGCTTCATGTCCACGGCATCTTGCGAGTCGAAGATCACCTACATCGATGGCGATAACGGAATCCTGCTTCACCGCGGCTACCCGATCGAACAACTGGCCGAGCAGTCCGATTATCTGGAAACCTGCTACCTGCTGCTCAATGGCGAATTGCCAACAGCCGAGCAGAAAGCCCAGTTCGTTGCCGTGGTCAAGAACCACACGATGGTTCACGAACAGCTCAAGACCTTTTTCAACGGCTTCCGTCGTGATGCCCACCCGATGGCCGTCATGTGCGGCGTAGTCGGCGCCC
	1	BoreoHeathMossGrass	plant	Salix herbacea	2020	HV2009_19	CAATTCTGACGGGTACAGTGGGTCCGGACGTGATCGACGTACGCGGTCTCACCGCCACCGGCCGCTTCACATTCGACCCTGGCTTCATGTCCACGGCATCTTGCGAGTCGAAGATCACCTACATCGATGGCGATAACGGAATCCTGCTTCACCGCGGCTACCCGATCGAACAACTGGCCGAGCAGTCCGATTATCTGGAAACCTGCTACCTGCTGCTCAATGGCGAATTGCCAACAGCCGAGCAGAAAGCCCAGTTCGTTGCCGTGGTCAAGAACCACACGATGGTTCACGAACAGCTCAAGACCTTTTTCAACGGCTTCCGTCGTGATGCCCACCCGATGGCCGTCATGTGCGGCGTAGTCGGCGCCC
	1	BoreoHeathMossGrass	plant	Salix herbacea	2020	HV2009_26	CAATTCTGACGGGTACAGTGGGTCCGGACGTGATCGACGTACGCGGTCTCACCGCCACCGGCCGCTTCACATTCGACCCTGGCTTCATGTCCACGGCATCTTGCGAGTCGAAGATCACCTACATCGATGGCGATAACGGAATCCTGCTTCACCGCGGCTACCCGATCGAACAACTGGCCGAGCAGTCCGATTATCTGGAAACCTGCTACCTGCTGCTCAATGGCGAATTGCCAACAGCCGAGCAGAAAGCCCAGTTCGTTGCCGTGGTCAAGAACCACACGATGGTTCACGAACAGCTCAAGACCTTTTTCAACGGCTTCCGTCGTGATGCCCACCCGATGGCCGTCATGTGCGGCGTAGTCGGCGCCC
	1	BoreoHeathMossGrass	plant	Salix herbacea	2020	HV2009_27	CAATTCTGACGGGTACAGTGGGTCCGGACGTGATCGACGTACGCGGTCTCACCGCCACCGGCCGCTTCACATTCGACCCTGGCTTCATGTCCACGGCATCTTGCGAGTCGAAGATCACCTACATCGATGGCGATAACGGAATCCTGCTTCACCGCGGCTACCCGATCGAACAACTGGCCGAGCAGTCCGATTATCTGGAAACCTGCTACCTGCTGCTCAATGGCGAATTGCCAACAGCCGAGCAGAAAGCCCAGTTCGTTGCCGTGGTCAAGAACCACACGATGGTTCACGAACAGCTCAAGACCTTTTTCAACGGCTTCCGTCGTGATGCCCACCCGATGGCCGTCATGTGCGGCGTAGTCGGCGCCC
	1	BoreoHeathMossGrass	plant	Salix herbacea	2020	HV2009_28	CAATTCTGACGGGTACAGTGGGTCCGGACGTGATCGACGTACGCGGTCTCACCGCCACCGGCCGCTTCACATTCGACCCTGGCTTCATGTCCACGGCATCTTGCGAGTCGAAGATCACCTACATCGATGGCGATAACGGAATCCTGCTTCACCGCGGCTACCCGATCGAACAACTGGCCGAGCAGTCCGATTATCTGGAAACCTGCTACCTGCTGCTCAATGGCGAATTGCCAACAGCCGAGCAGAAAGCCCAGTTCGTTGCCGTGGTCAAGAACCACACGATGGTTCACGAACAGCTCAAGACCTTTTTCAACGGCTTCCGTCGTGATGCCCACCCGATGGCCGTCATGTGCGGCGTAGTCGGCGCCC
	1	BoreoHeathMossGrass	plant	Salix herbacea	2020	HV2009_29	CAATTCTGACGGGTACAGTGGGTCCGGACGTGATCGACGTACGCGGTCTCACCGCCACCGGCCGCTTCACATTCGACCCTGGCTTCATGTCCACGGCATCTTGCGAGTCGAAGATCACCTACATCGATGGCGATAACGGAATCCTGCTTCACCGCGGCTACCCGATCGAACAACTGGCCGAGCAGTCCGATTATCTGGAAACCTGCTACCTGCTGCTCAATGGCGAATTGCCAACAGCCGAGCAGAAAGCCCAGTTCGTTGCCGTGGTCAAGAACCACACGATGGTTCACGAACAGCTCAAGACCTTTTTCAACGGCTTCCGTCGTGATGCCCACCCGATGGCCGTCATGTGCGGCGTAGTCGGCGCCC
	1	BoreoHeathMossGrass	plant	Salix herbacea	2020	HV2009_30	CAATTCTGACGGGTACAGTGGGTCCGGACGTGATCGACGTACGCGGTCTCACCGCCACCGGCCGCTTCACATTCGACCCTGGCTTCATGTCCACGGCATCTTGCGAGTCGAAGATCACCTACATCGATGGCGATAACGGAATCCTGCTTCACCGCGGCTACCCGATCGAACAACTGGCCGAGCAGTCCGATTATCTGGAAACCTGCTACCTGCTGCTCAATGGCGAATTGCCAACAGCCGAGCAGAAAGCCCAGTTCGTTGCCGTGGTCAAGAACCACACGATGGTTCACGAACAGCTCAAGACCTTTTTCAACGGCTTCCGTCGTGATGCCCACCCGATGGCCGTCATGTGCGGCGTAGTCGGCGCCC
	1	BoreoHeathMossGrass	plant	wild grasses from mixed stand -location_4	2018	ISL0337	CAATTCTGACGGGTACAGTGGGTCCGGACGTGATCGACGTACGCGGTCTCACCGCCACCGGCCGCTTCACATTCGACCCTGGCTTCATGTCCACGGCATCTTGCGAGTCGAAGATCACCTACATCGATGGCGATAACGGAATCCTGCTTCACCGCGGCTACCCGATCGAACAACTGGCCGAGCAGTCCGATTATCTGGAAACCTGCTACCTGCTGCTCAATGGCGAATTGCCAACAGCCGAGCAGAAAGCCCAGTTCGTTGCCGTGGTCAAGAACCACACGATGGTTCACGAACAGCTCAAGACCTTTTTCAACGGCTTCCGTCGTGATGCCCACCCGATGGCCGTCATGTGCGGCGTAGTCGGCGCCC
	1	OroborealAlpineGlacier	plant	Empetrum nigrum	2020	SU2005_02	CAATTCTGACGGGTACAGTGGGTCCGGACGTGATCGACGTACGCGGTCTCACCGCCACCGGCCGCTTCACATTCGACCCTGGCTTCATGTCCACGGCATCTTGCGAGTCGAAGATCACCTACATCGATGGCGATAACGGAATCCTGCTTCACCGCGGCTACCCGATCGAACAACTGGCCGAGCAGTCCGATTATCTGGAAACCTGCTACCTGCTGCTCAATGGCGAATTGCCAACAGCCGAGCAGAAAGCCCAGTTCGTTGCCGTGGTCAAGAACCACACGATGGTTCACGAACAGCTCAAGACCTTTTTCAACGGCTTCCGTCGTGATGCCCACCCGATGGCCGTCATGTGCGGCGTAGTCGGCGCCC
	1	OroborealAlpineGlacier	plant	Empetrum nigrum	2020	SU2005_03	CAATTCTGACGGGTACAGTGGGTCCGGACGTGATCGACGTACGCGGTCTCACCGCCACCGGCCGCTTCACATTCGACCCTGGCTTCATGTCCACGGCATCTTGCGAGTCGAAGATCACCTACATCGATGGCGATAACGGAATCCTGCTTCACCGCGGCTACCCGATCGAACAACTGGCCGAGCAGTCCGATTATCTGGAAACCTGCTACCTGCTGCTCAATGGCGAATTGCCAACAGCCGAGCAGAAAGCCCAGTTCGTTGCCGTGGTCAAGAACCACACGATGGTTCACGAACAGCTCAAGACCTTTTTCAACGGCTTCCGTCGTGATGCCCACCCGATGGCCGTCATGTGCGGCGTAGTCGGCGCCC
	1	OroborealAlpineGlacier	plant	Empetrum nigrum	2020	SU2005_04	CAATTCTGACGGGTACAGTGGGTCCGGACGTGATCGACGTACGCGGTCTCACCGCCACCGGCCGCTTCACATTCGACCCTGGCTTCATGTCCACGGCATCTTGCGAGTCGAAGATCACCTACATCGATGGCGATAACGGAATCCTGCTTCACCGCGGCTACCCGATCGAACAACTGGCCGAGCAGTCCGATTATCTGGAAACCTGCTACCTGCTGCTCAATGGCGAATTGCCAACAGCCGAGCAGAAAGCCCAGTTCGTTGCCGTGGTCAAGAACCACACGATGGTTCACGAACAGCTCAAGACCTTTTTCAACGGCTTCCGTCGTGATGCCCACCCGATGGCCGTCATGTGCGGCGTAGTCGGCGCCC
	1	OroborealAlpineGlacier	moss	Hylocomium splendens	2020	SU2006_04	CAATTCTGACGGGTACAGTGGGTCCGGACGTGATCGACGTACGCGGTCTCACCGCCACCGGCCGCTTCACATTCGACCCTGGCTTCATGTCCACGGCATCTTGCGAGTCGAAGATCACCTACATCGATGGCGATAACGGAATCCTGCTTCACCGCGGCTACCCGATCGAACAACTGGCCGAGCAGTCCGATTATCTGGAAACCTGCTACCTGCTGCTCAATGGCGAATTGCCAACAGCCGAGCAGAAAGCCCAGTTCGTTGCCGTGGTCAAGAACCACACGATGGTTCACGAACAGCTCAAGACCTTTTTCAACGGCTTCCGTCGTGATGCCCACCCGATGGCCGTCATGTGCGGCGTAGTCGGCGCCC
	1	OroborealAlpineGlacier	moss	Hylocomium splendens	2020	SU2006_05	CAATTCTGACGGGTACAGTGGGTCCGGACGTGATCGACGTACGCGGTCTCACCGCCACCGGCCGCTTCACATTCGACCCTGGCTTCATGTCCACGGCATCTTGCGAGTCGAAGATCACCTACATCGATGGCGATAACGGAATCCTGCTTCACCGCGGCTACCCGATCGAACAACTGGCCGAGCAGTCCGATTATCTGGAAACCTGCTACCTGCTGCTCAATGGCGAATTGCCAACAGCCGAGCAGAAAGCCCAGTTCGTTGCCGTGGTCAAGAACCACACGATGGTTCACGAACAGCTCAAGACCTTTTTCAACGGCTTCCGTCGTGATGCCCACCCGATGGCCGTCATGTGCGGCGTAGTCGGCGCCC
	1	OroborealAlpineGlacier	moss	Hylocomium splendens	2020	SU2006_06	CAATTCTGACGGGTACAGTGGGTCCGGACGTGATCGACGTACGCGGTCTCACCGCCACCGGCCGCTTCACATTCGACCCTGGCTTCATGTCCACGGCATCTTGCGAGTCGAAGATCACCTACATCGATGGCGATAACGGAATCCTGCTTCACCGCGGCTACCCGATCGAACAACTGGCCGAGCAGTCCGATTATCTGGAAACCTGCTACCTGCTGCTCAATGGCGAATTGCCAACAGCCGAGCAGAAAGCCCAGTTCGTTGCCGTGGTCAAGAACCACACGATGGTTCACGAACAGCTCAAGACCTTTTTCAACGGCTTCCGTCGTGATGCCCACCCGATGGCCGTCATGTGCGGCGTAGTCGGCGCCC
	1	OroborealAlpineGlacier	moss	Hylocomium splendens	2020	SU2006_07	CAATTCTGACGGGTACAGTGGGTCCGGACGTGATCGACGTACGCGGTCTCACCGCCACCGGCCGCTTCACATTCGACCCTGGCTTCATGTCCACGGCATCTTGCGAGTCGAAGATCACCTACATCGATGGCGATAACGGAATCCTGCTTCACCGCGGCTACCCGATCGAACAACTGGCCGAGCAGTCCGATTATCTGGAAACCTGCTACCTGCTGCTCAATGGCGAATTGCCAACAGCCGAGCAGAAAGCCCAGTTCGTTGCCGTGGTCAAGAACCACACGATGGTTCACGAACAGCTCAAGACCTTTTTCAACGGCTTCCGTCGTGATGCCCACCCGATGGCCGTCATGTGCGGCGTAGTCGGCGCCC
	2	forest	plant	Empetrum nigrum	2020	EG2005_13	CAATTCTGACGGGTACAGTGGGTCCGGACGTGATCGACGTACGCGGTCTCACCGCCACCGGCCGCTTCACATTCGACCCTGGCTTCATGTCCACGGCATCTTGCGAGTCGAAGATCACCTACATCGATGGCGATAACGGAATCCTGCTTCACCGCGGCTACCCGATCGAACAACTGGCCGAGCAGTCCGATTATCTGGAAACCTGCTACCTGCTGCTCAATGGCGAATTGCCAACAGCCGAGCAGAAAGCCCAGTTCGTTGCCGTGGTCAAGAACCACACGATGGTTCACGAACAGCTCAAGACCTTTTTCAACGGCTTCCGTTGTGATGCCCACCCGATGGCCGTCATGTGCGGTGTAGTCGGCGCCC
	2	forest	plant	Empetrum nigrum	2020	EG2005_16	CAATTCTGACGGGTACAGTGGGTCCGGACGTGATCGACGTACGCGGTCTCACCGCCACCGGCCGCTTCACATTCGACCCTGGCTTCATGTCCACGGCATCTTGCGAGTCGAAGATCACCTACATCGATGGCGATAACGGAATCCTGCTTCACCGCGGCTACCCGATCGAACAACTGGCCGAGCAGTCCGATTATCTGGAAACCTGCTACCTGCTGCTCAATGGCGAATTGCCAACAGCCGAGCAGAAAGCCCAGTTCGTTGCCGTGGTCAAGAACCACACGATGGTTCACGAACAGCTCAAGACCTTTTTCAACGGCTTCCGTTGTGATGCCCACCCGATGGCCGTCATGTGCGGTGTAGTCGGCGCCC
	2	forest	plant	Empetrum nigrum	2020	EG2005_17	CAATTCTGACGGGTACAGTGGGTCCGGACGTGATCGACGTACGCGGTCTCACCGCCACCGGCCGCTTCACATTCGACCCTGGCTTCATGTCCACGGCATCTTGCGAGTCGAAGATCACCTACATCGATGGCGATAACGGAATCCTGCTTCACCGCGGCTACCCGATCGAACAACTGGCCGAGCAGTCCGATTATCTGGAAACCTGCTACCTGCTGCTCAATGGCGAATTGCCAACAGCCGAGCAGAAAGCCCAGTTCGTTGCCGTGGTCAAGAACCACACGATGGTTCACGAACAGCTCAAGACCTTTTTCAACGGCTTCCGTTGTGATGCCCACCCGATGGCCGTCATGTGCGGTGTAGTCGGCGCCC
	3	forest	moss	Hylocomium splendens	2020	EG2002_30	CAATTCTGACGGGTACAGTGGGTCCGGACGTGATCGACGTACGCGGTCTCACCGCCACCGGCCGCTTCACATTCGACCCTGGCTTCATGTCCACGGCATCTTGCGAGTCGAAGATCACCTACATCGATGGCGATAACGGAATCCTGCTTCACCGCGGCTACCCGATCGAACAACTGGCCGAGCAGTCCGATTATCTGGAAACCTGCTACCTGCTGCTCAATGGCGAATTGCCAACAGCCGAGCAGAAAGCCCAGTTCGTTGCCGTGGTCAAGAACCACACGATGGTTCACGAACAGCTCAAGACCTTTTTCAACGGCTTCCGTCGTGATGCCCACCCGATGGCCGTCATGTGCGGTGTAGTCGGCGCCC
	3	forest	plant	Empetrum nigrum	2020	EG2005_03	CAATTCTGACGGGTACAGTGGGTCCGGACGTGATCGACGTACGCGGTCTCACCGCCACCGGCCGCTTCACATTCGACCCTGGCTTCATGTCCACGGCATCTTGCGAGTCGAAGATCACCTACATCGATGGCGATAACGGAATCCTGCTTCACCGCGGCTACCCGATCGAACAACTGGCCGAGCAGTCCGATTATCTGGAAACCTGCTACCTGCTGCTCAATGGCGAATTGCCAACAGCCGAGCAGAAAGCCCAGTTCGTTGCCGTGGTCAAGAACCACACGATGGTTCACGAACAGCTCAAGACCTTTTTCAACGGCTTCCGTCGTGATGCCCACCCGATGGCCGTCATGTGCGGTGTAGTCGGCGCCC
	3	forest	plant	Empetrum nigrum	2020	EG2005_04	CAATTCTGACGGGTACAGTGGGTCCGGACGTGATCGACGTACGCGGTCTCACCGCCACCGGCCGCTTCACATTCGACCCTGGCTTCATGTCCACGGCATCTTGCGAGTCGAAGATCACCTACATCGATGGCGATAACGGAATCCTGCTTCACCGCGGCTACCCGATCGAACAACTGGCCGAGCAGTCCGATTATCTGGAAACCTGCTACCTGCTGCTCAATGGCGAATTGCCAACAGCCGAGCAGAAAGCCCAGTTCGTTGCCGTGGTCAAGAACCACACGATGGTTCACGAACAGCTCAAGACCTTTTTCAACGGCTTCCGTCGTGATGCCCACCCGATGGCCGTCATGTGCGGTGTAGTCGGCGCCC
	3	forest	plant	Empetrum nigrum	2020	EG2005_06	CAATTCTGACGGGTACAGTGGGTCCGGACGTGATCGACGTACGCGGTCTCACCGCCACCGGCCGCTTCACATTCGACCCTGGCTTCATGTCCACGGCATCTTGCGAGTCGAAGATCACCTACATCGATGGCGATAACGGAATCCTGCTTCACCGCGGCTACCCGATCGAACAACTGGCCGAGCAGTCCGATTATCTGGAAACCTGCTACCTGCTGCTCAATGGCGAATTGCCAACAGCCGAGCAGAAAGCCCAGTTCGTTGCCGTGGTCAAGAACCACACGATGGTTCACGAACAGCTCAAGACCTTTTTCAACGGCTTCCGTCGTGATGCCCACCCGATGGCCGTCATGTGCGGTGTAGTCGGCGCCC
	3	forest	plant	Empetrum nigrum	2020	EG2005_08	CAATTCTGACGGGTACAGTGGGTCCGGACGTGATCGACGTACGCGGTCTCACCGCCACCGGCCGCTTCACATTCGACCCTGGCTTCATGTCCACGGCATCTTGCGAGTCGAAGATCACCTACATCGATGGCGATAACGGAATCCTGCTTCACCGCGGCTACCCGATCGAACAACTGGCCGAGCAGTCCGATTATCTGGAAACCTGCTACCTGCTGCTCAATGGCGAATTGCCAACAGCCGAGCAGAAAGCCCAGTTCGTTGCCGTGGTCAAGAACCACACGATGGTTCACGAACAGCTCAAGACCTTTTTCAACGGCTTCCGTCGTGATGCCCACCCGATGGCCGTCATGTGCGGTGTAGTCGGCGCCC
	3	forest	plant	Empetrum nigrum	2020	EG2005_09	CAATTCTGACGGGTACAGTGGGTCCGGACGTGATCGACGTACGCGGTCTCACCGCCACCGGCCGCTTCACATTCGACCCTGGCTTCATGTCCACGGCATCTTGCGAGTCGAAGATCACCTACATCGATGGCGATAACGGAATCCTGCTTCACCGCGGCTACCCGATCGAACAACTGGCCGAGCAGTCCGATTATCTGGAAACCTGCTACCTGCTGCTCAATGGCGAATTGCCAACAGCCGAGCAGAAAGCCCAGTTCGTTGCCGTGGTCAAGAACCACACGATGGTTCACGAACAGCTCAAGACCTTTTTCAACGGCTTCCGTCGTGATGCCCACCCGATGGCCGTCATGTGCGGTGTAGTCGGCGCCC
	3	forest	plant	Empetrum nigrum	2020	EG2005_11	CAATTCTGACGGGTACAGTGGGTCCGGACGTGATCGACGTACGCGGTCTCACCGCCACCGGCCGCTTCACATTCGACCCTGGCTTCATGTCCACGGCATCTTGCGAGTCGAAGATCACCTACATCGATGGCGATAACGGAATCCTGCTTCACCGCGGCTACCCGATCGAACAACTGGCCGAGCAGTCCGATTATCTGGAAACCTGCTACCTGCTGCTCAATGGCGAATTGCCAACAGCCGAGCAGAAAGCCCAGTTCGTTGCCGTGGTCAAGAACCACACGATGGTTCACGAACAGCTCAAGACCTTTTTCAACGGCTTCCGTCGTGATGCCCACCCGATGGCCGTCATGTGCGGTGTAGTCGGCGCCC
	3	forest	plant	Empetrum nigrum	2020	EG2005_12	CAATTCTGACGGGTACAGTGGGTCCGGACGTGATCGACGTACGCGGTCTCACCGCCACCGGCCGCTTCACATTCGACCCTGGCTTCATGTCCACGGCATCTTGCGAGTCGAAGATCACCTACATCGATGGCGATAACGGAATCCTGCTTCACCGCGGCTACCCGATCGAACAACTGGCCGAGCAGTCCGATTATCTGGAAACCTGCTACCTGCTGCTCAATGGCGAATTGCCAACAGCCGAGCAGAAAGCCCAGTTCGTTGCCGTGGTCAAGAACCACACGATGGTTCACGAACAGCTCAAGACCTTTTTCAACGGCTTCCGTCGTGATGCCCACCCGATGGCCGTCATGTGCGGTGTAGTCGGCGCCC
	3	forest	plant	Empetrum nigrum	2020	EG2005_19	CAATTCTGACGGGTACAGTGGGTCCGGACGTGATCGACGTACGCGGTCTCACCGCCACCGGCCGCTTCACATTCGACCCTGGCTTCATGTCCACGGCATCTTGCGAGTCGAAGATCACCTACATCGATGGCGATAACGGAATCCTGCTTCACCGCGGCTACCCGATCGAACAACTGGCCGAGCAGTCCGATTATCTGGAAACCTGCTACCTGCTGCTCAATGGCGAATTGCCAACAGCCGAGCAGAAAGCCCAGTTCGTTGCCGTGGTCAAGAACCACACGATGGTTCACGAACAGCTCAAGACCTTTTTCAACGGCTTCCGTCGTGATGCCCACCCGATGGCCGTCATGTGCGGTGTAGTCGGCGCCC
	4	forest	moss	Hylocomium splendens	2020	EG2002_07	CAATTCTGACGGGTACAGTGGGTCCGGACGTGATCGACGTACGCGGTCTCACCGCCACCGGCCGCTTCACATTTGACCCTGGCTTCATGTCCACGGCATCTTGCGAGTCGAAGATCACCTACATCGATGGCGATAACGGAATCCTGCTTCACCGCGGCTACCCGATCGAACAACTGGCCGAGCAGTCCGATTATCTGGAAACCTGCTACCTGCTGCTCAATGGCGAATTGCCAACAGCCGAGCAGAAAGCCCAGTTCGTTGCCGTGGTCAAGAACCACACGATGGTTCACGAACAGCTCAAGACCTTTTTCAACGGCTTCCGTCGTGATGCCCACCCGATGGCCGTCATGTGCGGCGTAGTCGGCGCCC
	4	forest	moss	Hylocomium splendens	2020	EG2002_08	CAATTCTGACGGGTACAGTGGGTCCGGACGTGATCGACGTACGCGGTCTCACCGCCACCGGCCGCTTCACATTTGACCCTGGCTTCATGTCCACGGCATCTTGCGAGTCGAAGATCACCTACATCGATGGCGATAACGGAATCCTGCTTCACCGCGGCTACCCGATCGAACAACTGGCCGAGCAGTCCGATTATCTGGAAACCTGCTACCTGCTGCTCAATGGCGAATTGCCAACAGCCGAGCAGAAAGCCCAGTTCGTTGCCGTGGTCAAGAACCACACGATGGTTCACGAACAGCTCAAGACCTTTTTCAACGGCTTCCGTCGTGATGCCCACCCGATGGCCGTCATGTGCGGCGTAGTCGGCGCCC
	4	forest	moss	Hylocomium splendens	2020	EG2002_13	CAATTCTGACGGGTACAGTGGGTCCGGACGTGATCGACGTACGCGGTCTCACCGCCACCGGCCGCTTCACATTTGACCCTGGCTTCATGTCCACGGCATCTTGCGAGTCGAAGATCACCTACATCGATGGCGATAACGGAATCCTGCTTCACCGCGGCTACCCGATCGAACAACTGGCCGAGCAGTCCGATTATCTGGAAACCTGCTACCTGCTGCTCAATGGCGAATTGCCAACAGCCGAGCAGAAAGCCCAGTTCGTTGCCGTGGTCAAGAACCACACGATGGTTCACGAACAGCTCAAGACCTTTTTCAACGGCTTCCGTCGTGATGCCCACCCGATGGCCGTCATGTGCGGCGTAGTCGGCGCCC
	4	forest	moss	Hylocomium splendens	2020	EG2002_17	CAATTCTGACGGGTACAGTGGGTCCGGACGTGATCGACGTACGCGGTCTCACCGCCACCGGCCGCTTCACATTTGACCCTGGCTTCATGTCCACGGCATCTTGCGAGTCGAAGATCACCTACATCGATGGCGATAACGGAATCCTGCTTCACCGCGGCTACCCGATCGAACAACTGGCCGAGCAGTCCGATTATCTGGAAACCTGCTACCTGCTGCTCAATGGCGAATTGCCAACAGCCGAGCAGAAAGCCCAGTTCGTTGCCGTGGTCAAGAACCACACGATGGTTCACGAACAGCTCAAGACCTTTTTCAACGGCTTCCGTCGTGATGCCCACCCGATGGCCGTCATGTGCGGCGTAGTCGGCGCCC
	4	forest	moss	Hylocomium splendens	2020	EG2002_18	CAATTCTGACGGGTACAGTGGGTCCGGACGTGATCGACGTACGCGGTCTCACCGCCACCGGCCGCTTCACATTTGACCCTGGCTTCATGTCCACGGCATCTTGCGAGTCGAAGATCACCTACATCGATGGCGATAACGGAATCCTGCTTCACCGCGGCTACCCGATCGAACAACTGGCCGAGCAGTCCGATTATCTGGAAACCTGCTACCTGCTGCTCAATGGCGAATTGCCAACAGCCGAGCAGAAAGCCCAGTTCGTTGCCGTGGTCAAGAACCACACGATGGTTCACGAACAGCTCAAGACCTTTTTCAACGGCTTCCGTCGTGATGCCCACCCGATGGCCGTCATGTGCGGCGTAGTCGGCGCCC
	4	forest	moss	Hylocomium splendens	2020	EG2002_19	CAATTCTGACGGGTACAGTGGGTCCGGACGTGATCGACGTACGCGGTCTCACCGCCACCGGCCGCTTCACATTTGACCCTGGCTTCATGTCCACGGCATCTTGCGAGTCGAAGATCACCTACATCGATGGCGATAACGGAATCCTGCTTCACCGCGGCTACCCGATCGAACAACTGGCCGAGCAGTCCGATTATCTGGAAACCTGCTACCTGCTGCTCAATGGCGAATTGCCAACAGCCGAGCAGAAAGCCCAGTTCGTTGCCGTGGTCAAGAACCACACGATGGTTCACGAACAGCTCAAGACCTTTTTCAACGGCTTCCGTCGTGATGCCCACCCGATGGCCGTCATGTGCGGCGTAGTCGGCGCCC
	4	forest	moss	Hylocomium splendens	2020	EG2002_20	CAATTCTGACGGGTACAGTGGGTCCGGACGTGATCGACGTACGCGGTCTCACCGCCACCGGCCGCTTCACATTTGACCCTGGCTTCATGTCCACGGCATCTTGCGAGTCGAAGATCACCTACATCGATGGCGATAACGGAATCCTGCTTCACCGCGGCTACCCGATCGAACAACTGGCCGAGCAGTCCGATTATCTGGAAACCTGCTACCTGCTGCTCAATGGCGAATTGCCAACAGCCGAGCAGAAAGCCCAGTTCGTTGCCGTGGTCAAGAACCACACGATGGTTCACGAACAGCTCAAGACCTTTTTCAACGGCTTCCGTCGTGATGCCCACCCGATGGCCGTCATGTGCGGCGTAGTCGGCGCCC
	4	forest	moss	Hylocomium splendens	2020	EG2002_21	CAATTCTGACGGGTACAGTGGGTCCGGACGTGATCGACGTACGCGGTCTCACCGCCACCGGCCGCTTCACATTTGACCCTGGCTTCATGTCCACGGCATCTTGCGAGTCGAAGATCACCTACATCGATGGCGATAACGGAATCCTGCTTCACCGCGGCTACCCGATCGAACAACTGGCCGAGCAGTCCGATTATCTGGAAACCTGCTACCTGCTGCTCAATGGCGAATTGCCAACAGCCGAGCAGAAAGCCCAGTTCGTTGCCGTGGTCAAGAACCACACGATGGTTCACGAACAGCTCAAGACCTTTTTCAACGGCTTCCGTCGTGATGCCCACCCGATGGCCGTCATGTGCGGCGTAGTCGGCGCCC
	4	forest	moss	Hylocomium splendens	2020	EG2002_23	CAATTCTGACGGGTACAGTGGGTCCGGACGTGATCGACGTACGCGGTCTCACCGCCACCGGCCGCTTCACATTTGACCCTGGCTTCATGTCCACGGCATCTTGCGAGTCGAAGATCACCTACATCGATGGCGATAACGGAATCCTGCTTCACCGCGGCTACCCGATCGAACAACTGGCCGAGCAGTCCGATTATCTGGAAACCTGCTACCTGCTGCTCAATGGCGAATTGCCAACAGCCGAGCAGAAAGCCCAGTTCGTTGCCGTGGTCAAGAACCACACGATGGTTCACGAACAGCTCAAGACCTTTTTCAACGGCTTCCGTCGTGATGCCCACCCGATGGCCGTCATGTGCGGCGTAGTCGGCGCCC
	5	forest	plant	Rubus saxatilis	2020	EG2011_01	CAATTCTGACGGGTACAGTGGGTCCGGACGTGATCGACGTACGCGGTCTCACCGCCACCGGCCGCTTCACATTTGACCCTGGCTTCATGTCCACGGCATCTTGCGAGTCGAAGATCACCTACATCGATGGCGATAACGGAATCCTGCTTCACCGCGGCTACCCGATCGAACAACTGGCCGAGCAGTCCGATTATCTGGAAACCTGCTACCTGCTGCTCAATGGCGAATTGCCAACAGCCGAGCAGAAAGCCCAGTTCGTTGCCGTGGTCAAGAACCACACGATGGTTCACGAACAGCTCAAGACCTTTTTCAACGGCTTCCGTCGTGATGCCCACCCGATGGCCGTCATGTGCGGTGTAGTCGGCGCCC
	5	OroborealAlpineGlacier	plant	Empetrum nigrum	2020	SU2002_09	CAATTCTGACGGGTACAGTGGGTCCGGACGTGATCGACGTACGCGGTCTCACCGCCACCGGCCGCTTCACATTTGACCCTGGCTTCATGTCCACGGCATCTTGCGAGTCGAAGATCACCTACATCGATGGCGATAACGGAATCCTGCTTCACCGCGGCTACCCGATCGAACAACTGGCCGAGCAGTCCGATTATCTGGAAACCTGCTACCTGCTGCTCAATGGCGAATTGCCAACAGCCGAGCAGAAAGCCCAGTTCGTTGCCGTGGTCAAGAACCACACGATGGTTCACGAACAGCTCAAGACCTTTTTCAACGGCTTCCGTCGTGATGCCCACCCGATGGCCGTCATGTGCGGTGTAGTCGGCGCCC
	5	OroborealAlpineGlacier	plant	Empetrum nigrum	2020	SU2002_27	CAATTCTGACGGGTACAGTGGGTCCGGACGTGATCGACGTACGCGGTCTCACCGCCACCGGCCGCTTCACATTTGACCCTGGCTTCATGTCCACGGCATCTTGCGAGTCGAAGATCACCTACATCGATGGCGATAACGGAATCCTGCTTCACCGCGGCTACCCGATCGAACAACTGGCCGAGCAGTCCGATTATCTGGAAACCTGCTACCTGCTGCTCAATGGCGAATTGCCAACAGCCGAGCAGAAAGCCCAGTTCGTTGCCGTGGTCAAGAACCACACGATGGTTCACGAACAGCTCAAGACCTTTTTCAACGGCTTCCGTCGTGATGCCCACCCGATGGCCGTCATGTGCGGTGTAGTCGGCGCCC
	5	OroborealAlpineGlacier	plant	Empetrum nigrum	2020	SU2002_29	CAATTCTGACGGGTACAGTGGGTCCGGACGTGATCGACGTACGCGGTCTCACCGCCACCGGCCGCTTCACATTTGACCCTGGCTTCATGTCCACGGCATCTTGCGAGTCGAAGATCACCTACATCGATGGCGATAACGGAATCCTGCTTCACCGCGGCTACCCGATCGAACAACTGGCCGAGCAGTCCGATTATCTGGAAACCTGCTACCTGCTGCTCAATGGCGAATTGCCAACAGCCGAGCAGAAAGCCCAGTTCGTTGCCGTGGTCAAGAACCACACGATGGTTCACGAACAGCTCAAGACCTTTTTCAACGGCTTCCGTCGTGATGCCCACCCGATGGCCGTCATGTGCGGTGTAGTCGGCGCCC
	5	OroborealAlpineGlacier	moss	Hylocomium splendens	2020	SU2003_04	CAATTCTGACGGGTACAGTGGGTCCGGACGTGATCGACGTACGCGGTCTCACCGCCACCGGCCGCTTCACATTTGACCCTGGCTTCATGTCCACGGCATCTTGCGAGTCGAAGATCACCTACATCGATGGCGATAACGGAATCCTGCTTCACCGCGGCTACCCGATCGAACAACTGGCCGAGCAGTCCGATTATCTGGAAACCTGCTACCTGCTGCTCAATGGCGAATTGCCAACAGCCGAGCAGAAAGCCCAGTTCGTTGCCGTGGTCAAGAACCACACGATGGTTCACGAACAGCTCAAGACCTTTTTCAACGGCTTCCGTCGTGATGCCCACCCGATGGCCGTCATGTGCGGTGTAGTCGGCGCCC
	5	OroborealAlpineGlacier	moss	Hylocomium splendens	2020	SU2003_05	CAATTCTGACGGGTACAGTGGGTCCGGACGTGATCGACGTACGCGGTCTCACCGCCACCGGCCGCTTCACATTTGACCCTGGCTTCATGTCCACGGCATCTTGCGAGTCGAAGATCACCTACATCGATGGCGATAACGGAATCCTGCTTCACCGCGGCTACCCGATCGAACAACTGGCCGAGCAGTCCGATTATCTGGAAACCTGCTACCTGCTGCTCAATGGCGAATTGCCAACAGCCGAGCAGAAAGCCCAGTTCGTTGCCGTGGTCAAGAACCACACGATGGTTCACGAACAGCTCAAGACCTTTTTCAACGGCTTCCGTCGTGATGCCCACCCGATGGCCGTCATGTGCGGTGTAGTCGGCGCCC
	5	OroborealAlpineGlacier	moss	Hylocomium splendens	2020	SU2003_12	CAATTCTGACGGGTACAGTGGGTCCGGACGTGATCGACGTACGCGGTCTCACCGCCACCGGCCGCTTCACATTTGACCCTGGCTTCATGTCCACGGCATCTTGCGAGTCGAAGATCACCTACATCGATGGCGATAACGGAATCCTGCTTCACCGCGGCTACCCGATCGAACAACTGGCCGAGCAGTCCGATTATCTGGAAACCTGCTACCTGCTGCTCAATGGCGAATTGCCAACAGCCGAGCAGAAAGCCCAGTTCGTTGCCGTGGTCAAGAACCACACGATGGTTCACGAACAGCTCAAGACCTTTTTCAACGGCTTCCGTCGTGATGCCCACCCGATGGCCGTCATGTGCGGTGTAGTCGGCGCCC
	5	OroborealAlpineGlacier	moss	Hylocomium splendens	2020	SU2003_14	CAATTCTGACGGGTACAGTGGGTCCGGACGTGATCGACGTACGCGGTCTCACCGCCACCGGCCGCTTCACATTTGACCCTGGCTTCATGTCCACGGCATCTTGCGAGTCGAAGATCACCTACATCGATGGCGATAACGGAATCCTGCTTCACCGCGGCTACCCGATCGAACAACTGGCCGAGCAGTCCGATTATCTGGAAACCTGCTACCTGCTGCTCAATGGCGAATTGCCAACAGCCGAGCAGAAAGCCCAGTTCGTTGCCGTGGTCAAGAACCACACGATGGTTCACGAACAGCTCAAGACCTTTTTCAACGGCTTCCGTCGTGATGCCCACCCGATGGCCGTCATGTGCGGTGTAGTCGGCGCCC
	5	OroborealAlpineGlacier	moss	Hylocomium splendens	2020	SU2003_15	CAATTCTGACGGGTACAGTGGGTCCGGACGTGATCGACGTACGCGGTCTCACCGCCACCGGCCGCTTCACATTTGACCCTGGCTTCATGTCCACGGCATCTTGCGAGTCGAAGATCACCTACATCGATGGCGATAACGGAATCCTGCTTCACCGCGGCTACCCGATCGAACAACTGGCCGAGCAGTCCGATTATCTGGAAACCTGCTACCTGCTGCTCAATGGCGAATTGCCAACAGCCGAGCAGAAAGCCCAGTTCGTTGCCGTGGTCAAGAACCACACGATGGTTCACGAACAGCTCAAGACCTTTTTCAACGGCTTCCGTCGTGATGCCCACCCGATGGCCGTCATGTGCGGTGTAGTCGGCGCCC
	5	OroborealAlpineGlacier	moss	Hylocomium splendens	2020	SU2003_16	CAATTCTGACGGGTACAGTGGGTCCGGACGTGATCGACGTACGCGGTCTCACCGCCACCGGCCGCTTCACATTTGACCCTGGCTTCATGTCCACGGCATCTTGCGAGTCGAAGATCACCTACATCGATGGCGATAACGGAATCCTGCTTCACCGCGGCTACCCGATCGAACAACTGGCCGAGCAGTCCGATTATCTGGAAACCTGCTACCTGCTGCTCAATGGCGAATTGCCAACAGCCGAGCAGAAAGCCCAGTTCGTTGCCGTGGTCAAGAACCACACGATGGTTCACGAACAGCTCAAGACCTTTTTCAACGGCTTCCGTCGTGATGCCCACCCGATGGCCGTCATGTGCGGTGTAGTCGGCGCCC
	5	OroborealAlpineGlacier	moss	Hylocomium splendens	2020	SU2003_24	CAATTCTGACGGGTACAGTGGGTCCGGACGTGATCGACGTACGCGGTCTCACCGCCACCGGCCGCTTCACATTTGACCCTGGCTTCATGTCCACGGCATCTTGCGAGTCGAAGATCACCTACATCGATGGCGATAACGGAATCCTGCTTCACCGCGGCTACCCGATCGAACAACTGGCCGAGCAGTCCGATTATCTGGAAACCTGCTACCTGCTGCTCAATGGCGAATTGCCAACAGCCGAGCAGAAAGCCCAGTTCGTTGCCGTGGTCAAGAACCACACGATGGTTCACGAACAGCTCAAGACCTTTTTCAACGGCTTCCGTCGTGATGCCCACCCGATGGCCGTCATGTGCGGTGTAGTCGGCGCCC
	5	OroborealAlpineGlacier	moss	Hylocomium splendens	2020	SU2006_01	CAATTCTGACGGGTACAGTGGGTCCGGACGTGATCGACGTACGCGGTCTCACCGCCACCGGCCGCTTCACATTTGACCCTGGCTTCATGTCCACGGCATCTTGCGAGTCGAAGATCACCTACATCGATGGCGATAACGGAATCCTGCTTCACCGCGGCTACCCGATCGAACAACTGGCCGAGCAGTCCGATTATCTGGAAACCTGCTACCTGCTGCTCAATGGCGAATTGCCAACAGCCGAGCAGAAAGCCCAGTTCGTTGCCGTGGTCAAGAACCACACGATGGTTCACGAACAGCTCAAGACCTTTTTCAACGGCTTCCGTCGTGATGCCCACCCGATGGCCGTCATGTGCGGTGTAGTCGGCGCCC
	5	OroborealAlpineGlacier	moss	Hylocomium splendens	2020	SU2006_02	CAATTCTGACGGGTACAGTGGGTCCGGACGTGATCGACGTACGCGGTCTCACCGCCACCGGCCGCTTCACATTTGACCCTGGCTTCATGTCCACGGCATCTTGCGAGTCGAAGATCACCTACATCGATGGCGATAACGGAATCCTGCTTCACCGCGGCTACCCGATCGAACAACTGGCCGAGCAGTCCGATTATCTGGAAACCTGCTACCTGCTGCTCAATGGCGAATTGCCAACAGCCGAGCAGAAAGCCCAGTTCGTTGCCGTGGTCAAGAACCACACGATGGTTCACGAACAGCTCAAGACCTTTTTCAACGGCTTCCGTCGTGATGCCCACCCGATGGCCGTCATGTGCGGTGTAGTCGGCGCCC
	5	OroborealAlpineGlacier	moss	Hylocomium splendens	2020	SU2006_03	CAATTCTGACGGGTACAGTGGGTCCGGACGTGATCGACGTACGCGGTCTCACCGCCACCGGCCGCTTCACATTTGACCCTGGCTTCATGTCCACGGCATCTTGCGAGTCGAAGATCACCTACATCGATGGCGATAACGGAATCCTGCTTCACCGCGGCTACCCGATCGAACAACTGGCCGAGCAGTCCGATTATCTGGAAACCTGCTACCTGCTGCTCAATGGCGAATTGCCAACAGCCGAGCAGAAAGCCCAGTTCGTTGCCGTGGTCAAGAACCACACGATGGTTCACGAACAGCTCAAGACCTTTTTCAACGGCTTCCGTCGTGATGCCCACCCGATGGCCGTCATGTGCGGTGTAGTCGGCGCCC
	6	forest	fern	Equisetum pratense	2020	EG2008_16	CAATTCTGACGGGTACAGTGGGTCCGGACGTGATCGACGTACGCGGTCTCACCGCCACCGGCCGCTTCACATTTGACCCTGGCTTCATGTCCACGGCATCTTGCGAGTCGAAGATCACCTACATCGATGGTGATAACGGAATCCTGCTTCACCGCGGCTACCCGATCGAACAACTGGCCGAGCAGTCCGATTATCTGGAAACCTGCTACCTGCTGCTCAATGGCGAATTGCCAACAGCCGAGCAGAAAGCCCAGTTCGTTGCCGTGGTCAAGAACCACACGATGGTTCACGAACAGCTCAAGACCTTTTTCAACGGCTTCCGTTGTGATGCCCACCCGATGGCCGTCATGTGCGGTGTAGTCGGCGCCC
	6	forest	fern	Equisetum pratense	2020	EG2008_17	CAATTCTGACGGGTACAGTGGGTCCGGACGTGATCGACGTACGCGGTCTCACCGCCACCGGCCGCTTCACATTTGACCCTGGCTTCATGTCCACGGCATCTTGCGAGTCGAAGATCACCTACATCGATGGTGATAACGGAATCCTGCTTCACCGCGGCTACCCGATCGAACAACTGGCCGAGCAGTCCGATTATCTGGAAACCTGCTACCTGCTGCTCAATGGCGAATTGCCAACAGCCGAGCAGAAAGCCCAGTTCGTTGCCGTGGTCAAGAACCACACGATGGTTCACGAACAGCTCAAGACCTTTTTCAACGGCTTCCGTTGTGATGCCCACCCGATGGCCGTCATGTGCGGTGTAGTCGGCGCCC
	6	forest	fern	Equisetum pratense	2020	EG2008_18	CAATTCTGACGGGTACAGTGGGTCCGGACGTGATCGACGTACGCGGTCTCACCGCCACCGGCCGCTTCACATTTGACCCTGGCTTCATGTCCACGGCATCTTGCGAGTCGAAGATCACCTACATCGATGGTGATAACGGAATCCTGCTTCACCGCGGCTACCCGATCGAACAACTGGCCGAGCAGTCCGATTATCTGGAAACCTGCTACCTGCTGCTCAATGGCGAATTGCCAACAGCCGAGCAGAAAGCCCAGTTCGTTGCCGTGGTCAAGAACCACACGATGGTTCACGAACAGCTCAAGACCTTTTTCAACGGCTTCCGTTGTGATGCCCACCCGATGGCCGTCATGTGCGGTGTAGTCGGCGCCC
	6	forest	fern	Equisetum pratense	2020	EG2008_21	CAATTCTGACGGGTACAGTGGGTCCGGACGTGATCGACGTACGCGGTCTCACCGCCACCGGCCGCTTCACATTTGACCCTGGCTTCATGTCCACGGCATCTTGCGAGTCGAAGATCACCTACATCGATGGTGATAACGGAATCCTGCTTCACCGCGGCTACCCGATCGAACAACTGGCCGAGCAGTCCGATTATCTGGAAACCTGCTACCTGCTGCTCAATGGCGAATTGCCAACAGCCGAGCAGAAAGCCCAGTTCGTTGCCGTGGTCAAGAACCACACGATGGTTCACGAACAGCTCAAGACCTTTTTCAACGGCTTCCGTTGTGATGCCCACCCGATGGCCGTCATGTGCGGTGTAGTCGGCGCCC
	6	forest	fern	Equisetum pratense	2020	EG2008_24	CAATTCTGACGGGTACAGTGGGTCCGGACGTGATCGACGTACGCGGTCTCACCGCCACCGGCCGCTTCACATTTGACCCTGGCTTCATGTCCACGGCATCTTGCGAGTCGAAGATCACCTACATCGATGGTGATAACGGAATCCTGCTTCACCGCGGCTACCCGATCGAACAACTGGCCGAGCAGTCCGATTATCTGGAAACCTGCTACCTGCTGCTCAATGGCGAATTGCCAACAGCCGAGCAGAAAGCCCAGTTCGTTGCCGTGGTCAAGAACCACACGATGGTTCACGAACAGCTCAAGACCTTTTTCAACGGCTTCCGTTGTGATGCCCACCCGATGGCCGTCATGTGCGGTGTAGTCGGCGCCC
	6	forest	fern	Equisetum pratense	2020	EG2008_29	CAATTCTGACGGGTACAGTGGGTCCGGACGTGATCGACGTACGCGGTCTCACCGCCACCGGCCGCTTCACATTTGACCCTGGCTTCATGTCCACGGCATCTTGCGAGTCGAAGATCACCTACATCGATGGTGATAACGGAATCCTGCTTCACCGCGGCTACCCGATCGAACAACTGGCCGAGCAGTCCGATTATCTGGAAACCTGCTACCTGCTGCTCAATGGCGAATTGCCAACAGCCGAGCAGAAAGCCCAGTTCGTTGCCGTGGTCAAGAACCACACGATGGTTCACGAACAGCTCAAGACCTTTTTCAACGGCTTCCGTTGTGATGCCCACCCGATGGCCGTCATGTGCGGTGTAGTCGGCGCCC
	7	forest	moss	Hylocomium splendens	2020	EG2007_01	CAATTCTGACGGGTACAGTGGGTCCGGACGTGATCGACGTACGCGGTCTCACCGCCACCGGCCGCTTCACATTTGACCCTGGCTTCATGTCCACGGCATCTTGCGAGTCGAAGATCACCTACATCGATGGTGATAACGGAATCCTGCTTCACCGCGGCTACCCGATCGAACAACTGGCCGAGCAGTCCGATTATCTGGAAACCTGCTACCTGCTGCTCAATGGCGAATTGCCAACAGCCGAGCAGAAAGCCCAGTTCGTTGCCGTGGTCAAGAACCACACGATGGTTCACGAACAGCTCAAGACCTTTTTCAACGGCTTCCGTCGTGATGCCCACCCGATGGCCGTCATGTGCGGTGTAGTCGGCGCCC
	7	forest	moss	Hylocomium splendens	2020	EG2007_02	CAATTCTGACGGGTACAGTGGGTCCGGACGTGATCGACGTACGCGGTCTCACCGCCACCGGCCGCTTCACATTTGACCCTGGCTTCATGTCCACGGCATCTTGCGAGTCGAAGATCACCTACATCGATGGTGATAACGGAATCCTGCTTCACCGCGGCTACCCGATCGAACAACTGGCCGAGCAGTCCGATTATCTGGAAACCTGCTACCTGCTGCTCAATGGCGAATTGCCAACAGCCGAGCAGAAAGCCCAGTTCGTTGCCGTGGTCAAGAACCACACGATGGTTCACGAACAGCTCAAGACCTTTTTCAACGGCTTCCGTCGTGATGCCCACCCGATGGCCGTCATGTGCGGTGTAGTCGGCGCCC
	7	forest	moss	Hylocomium splendens	2020	EG2007_03	CAATTCTGACGGGTACAGTGGGTCCGGACGTGATCGACGTACGCGGTCTCACCGCCACCGGCCGCTTCACATTTGACCCTGGCTTCATGTCCACGGCATCTTGCGAGTCGAAGATCACCTACATCGATGGTGATAACGGAATCCTGCTTCACCGCGGCTACCCGATCGAACAACTGGCCGAGCAGTCCGATTATCTGGAAACCTGCTACCTGCTGCTCAATGGCGAATTGCCAACAGCCGAGCAGAAAGCCCAGTTCGTTGCCGTGGTCAAGAACCACACGATGGTTCACGAACAGCTCAAGACCTTTTTCAACGGCTTCCGTCGTGATGCCCACCCGATGGCCGTCATGTGCGGTGTAGTCGGCGCCC
	7	forest	moss	Hylocomium splendens	2020	EG2007_06	CAATTCTGACGGGTACAGTGGGTCCGGACGTGATCGACGTACGCGGTCTCACCGCCACCGGCCGCTTCACATTTGACCCTGGCTTCATGTCCACGGCATCTTGCGAGTCGAAGATCACCTACATCGATGGTGATAACGGAATCCTGCTTCACCGCGGCTACCCGATCGAACAACTGGCCGAGCAGTCCGATTATCTGGAAACCTGCTACCTGCTGCTCAATGGCGAATTGCCAACAGCCGAGCAGAAAGCCCAGTTCGTTGCCGTGGTCAAGAACCACACGATGGTTCACGAACAGCTCAAGACCTTTTTCAACGGCTTCCGTCGTGATGCCCACCCGATGGCCGTCATGTGCGGTGTAGTCGGCGCCC
	7	forest	moss	Hylocomium splendens	2020	EG2007_11	CAATTCTGACGGGTACAGTGGGTCCGGACGTGATCGACGTACGCGGTCTCACCGCCACCGGCCGCTTCACATTTGACCCTGGCTTCATGTCCACGGCATCTTGCGAGTCGAAGATCACCTACATCGATGGTGATAACGGAATCCTGCTTCACCGCGGCTACCCGATCGAACAACTGGCCGAGCAGTCCGATTATCTGGAAACCTGCTACCTGCTGCTCAATGGCGAATTGCCAACAGCCGAGCAGAAAGCCCAGTTCGTTGCCGTGGTCAAGAACCACACGATGGTTCACGAACAGCTCAAGACCTTTTTCAACGGCTTCCGTCGTGATGCCCACCCGATGGCCGTCATGTGCGGTGTAGTCGGCGCCC
	7	forest	moss	Hylocomium splendens	2020	EG2007_12	CAATTCTGACGGGTACAGTGGGTCCGGACGTGATCGACGTACGCGGTCTCACCGCCACCGGCCGCTTCACATTTGACCCTGGCTTCATGTCCACGGCATCTTGCGAGTCGAAGATCACCTACATCGATGGTGATAACGGAATCCTGCTTCACCGCGGCTACCCGATCGAACAACTGGCCGAGCAGTCCGATTATCTGGAAACCTGCTACCTGCTGCTCAATGGCGAATTGCCAACAGCCGAGCAGAAAGCCCAGTTCGTTGCCGTGGTCAAGAACCACACGATGGTTCACGAACAGCTCAAGACCTTTTTCAACGGCTTCCGTCGTGATGCCCACCCGATGGCCGTCATGTGCGGTGTAGTCGGCGCCC
	7	forest	moss	Hylocomium splendens	2020	EG2007_13	CAATTCTGACGGGTACAGTGGGTCCGGACGTGATCGACGTACGCGGTCTCACCGCCACCGGCCGCTTCACATTTGACCCTGGCTTCATGTCCACGGCATCTTGCGAGTCGAAGATCACCTACATCGATGGTGATAACGGAATCCTGCTTCACCGCGGCTACCCGATCGAACAACTGGCCGAGCAGTCCGATTATCTGGAAACCTGCTACCTGCTGCTCAATGGCGAATTGCCAACAGCCGAGCAGAAAGCCCAGTTCGTTGCCGTGGTCAAGAACCACACGATGGTTCACGAACAGCTCAAGACCTTTTTCAACGGCTTCCGTCGTGATGCCCACCCGATGGCCGTCATGTGCGGTGTAGTCGGCGCCC
	7	forest	moss	Hylocomium splendens	2020	EG2007_14	CAATTCTGACGGGTACAGTGGGTCCGGACGTGATCGACGTACGCGGTCTCACCGCCACCGGCCGCTTCACATTTGACCCTGGCTTCATGTCCACGGCATCTTGCGAGTCGAAGATCACCTACATCGATGGTGATAACGGAATCCTGCTTCACCGCGGCTACCCGATCGAACAACTGGCCGAGCAGTCCGATTATCTGGAAACCTGCTACCTGCTGCTCAATGGCGAATTGCCAACAGCCGAGCAGAAAGCCCAGTTCGTTGCCGTGGTCAAGAACCACACGATGGTTCACGAACAGCTCAAGACCTTTTTCAACGGCTTCCGTCGTGATGCCCACCCGATGGCCGTCATGTGCGGTGTAGTCGGCGCCC
	7	forest	moss	Hylocomium splendens	2020	EG2007_15	CAATTCTGACGGGTACAGTGGGTCCGGACGTGATCGACGTACGCGGTCTCACCGCCACCGGCCGCTTCACATTTGACCCTGGCTTCATGTCCACGGCATCTTGCGAGTCGAAGATCACCTACATCGATGGTGATAACGGAATCCTGCTTCACCGCGGCTACCCGATCGAACAACTGGCCGAGCAGTCCGATTATCTGGAAACCTGCTACCTGCTGCTCAATGGCGAATTGCCAACAGCCGAGCAGAAAGCCCAGTTCGTTGCCGTGGTCAAGAACCACACGATGGTTCACGAACAGCTCAAGACCTTTTTCAACGGCTTCCGTCGTGATGCCCACCCGATGGCCGTCATGTGCGGTGTAGTCGGCGCCC
	7	forest	moss	Hylocomium splendens	2020	EG2007_18	CAATTCTGACGGGTACAGTGGGTCCGGACGTGATCGACGTACGCGGTCTCACCGCCACCGGCCGCTTCACATTTGACCCTGGCTTCATGTCCACGGCATCTTGCGAGTCGAAGATCACCTACATCGATGGTGATAACGGAATCCTGCTTCACCGCGGCTACCCGATCGAACAACTGGCCGAGCAGTCCGATTATCTGGAAACCTGCTACCTGCTGCTCAATGGCGAATTGCCAACAGCCGAGCAGAAAGCCCAGTTCGTTGCCGTGGTCAAGAACCACACGATGGTTCACGAACAGCTCAAGACCTTTTTCAACGGCTTCCGTCGTGATGCCCACCCGATGGCCGTCATGTGCGGTGTAGTCGGCGCCC
	7	forest	moss	Hylocomium splendens	2020	EG2007_20	CAATTCTGACGGGTACAGTGGGTCCGGACGTGATCGACGTACGCGGTCTCACCGCCACCGGCCGCTTCACATTTGACCCTGGCTTCATGTCCACGGCATCTTGCGAGTCGAAGATCACCTACATCGATGGTGATAACGGAATCCTGCTTCACCGCGGCTACCCGATCGAACAACTGGCCGAGCAGTCCGATTATCTGGAAACCTGCTACCTGCTGCTCAATGGCGAATTGCCAACAGCCGAGCAGAAAGCCCAGTTCGTTGCCGTGGTCAAGAACCACACGATGGTTCACGAACAGCTCAAGACCTTTTTCAACGGCTTCCGTCGTGATGCCCACCCGATGGCCGTCATGTGCGGTGTAGTCGGCGCCC
	7	forest	moss	Hylocomium splendens	2020	EG2007_22	CAATTCTGACGGGTACAGTGGGTCCGGACGTGATCGACGTACGCGGTCTCACCGCCACCGGCCGCTTCACATTTGACCCTGGCTTCATGTCCACGGCATCTTGCGAGTCGAAGATCACCTACATCGATGGTGATAACGGAATCCTGCTTCACCGCGGCTACCCGATCGAACAACTGGCCGAGCAGTCCGATTATCTGGAAACCTGCTACCTGCTGCTCAATGGCGAATTGCCAACAGCCGAGCAGAAAGCCCAGTTCGTTGCCGTGGTCAAGAACCACACGATGGTTCACGAACAGCTCAAGACCTTTTTCAACGGCTTCCGTCGTGATGCCCACCCGATGGCCGTCATGTGCGGTGTAGTCGGCGCCC
	7	forest	moss	Hylocomium splendens	2020	EG2007_24	CAATTCTGACGGGTACAGTGGGTCCGGACGTGATCGACGTACGCGGTCTCACCGCCACCGGCCGCTTCACATTTGACCCTGGCTTCATGTCCACGGCATCTTGCGAGTCGAAGATCACCTACATCGATGGTGATAACGGAATCCTGCTTCACCGCGGCTACCCGATCGAACAACTGGCCGAGCAGTCCGATTATCTGGAAACCTGCTACCTGCTGCTCAATGGCGAATTGCCAACAGCCGAGCAGAAAGCCCAGTTCGTTGCCGTGGTCAAGAACCACACGATGGTTCACGAACAGCTCAAGACCTTTTTCAACGGCTTCCGTCGTGATGCCCACCCGATGGCCGTCATGTGCGGTGTAGTCGGCGCCC
	7	forest	fern	Equisetum pratense	2020	EG2008_01	CAATTCTGACGGGTACAGTGGGTCCGGACGTGATCGACGTACGCGGTCTCACCGCCACCGGCCGCTTCACATTTGACCCTGGCTTCATGTCCACGGCATCTTGCGAGTCGAAGATCACCTACATCGATGGTGATAACGGAATCCTGCTTCACCGCGGCTACCCGATCGAACAACTGGCCGAGCAGTCCGATTATCTGGAAACCTGCTACCTGCTGCTCAATGGCGAATTGCCAACAGCCGAGCAGAAAGCCCAGTTCGTTGCCGTGGTCAAGAACCACACGATGGTTCACGAACAGCTCAAGACCTTTTTCAACGGCTTCCGTCGTGATGCCCACCCGATGGCCGTCATGTGCGGTGTAGTCGGCGCCC
	7	forest	fern	Equisetum pratense	2020	EG2008_12	CAATTCTGACGGGTACAGTGGGTCCGGACGTGATCGACGTACGCGGTCTCACCGCCACCGGCCGCTTCACATTTGACCCTGGCTTCATGTCCACGGCATCTTGCGAGTCGAAGATCACCTACATCGATGGTGATAACGGAATCCTGCTTCACCGCGGCTACCCGATCGAACAACTGGCCGAGCAGTCCGATTATCTGGAAACCTGCTACCTGCTGCTCAATGGCGAATTGCCAACAGCCGAGCAGAAAGCCCAGTTCGTTGCCGTGGTCAAGAACCACACGATGGTTCACGAACAGCTCAAGACCTTTTTCAACGGCTTCCGTCGTGATGCCCACCCGATGGCCGTCATGTGCGGTGTAGTCGGCGCCC
	7	forest	fern	Equisetum pratense	2020	EG2008_15	CAATTCTGACGGGTACAGTGGGTCCGGACGTGATCGACGTACGCGGTCTCACCGCCACCGGCCGCTTCACATTTGACCCTGGCTTCATGTCCACGGCATCTTGCGAGTCGAAGATCACCTACATCGATGGTGATAACGGAATCCTGCTTCACCGCGGCTACCCGATCGAACAACTGGCCGAGCAGTCCGATTATCTGGAAACCTGCTACCTGCTGCTCAATGGCGAATTGCCAACAGCCGAGCAGAAAGCCCAGTTCGTTGCCGTGGTCAAGAACCACACGATGGTTCACGAACAGCTCAAGACCTTTTTCAACGGCTTCCGTCGTGATGCCCACCCGATGGCCGTCATGTGCGGTGTAGTCGGCGCCC
	7	forest	fern	Equisetum pratense	2020	EG2008_19	CAATTCTGACGGGTACAGTGGGTCCGGACGTGATCGACGTACGCGGTCTCACCGCCACCGGCCGCTTCACATTTGACCCTGGCTTCATGTCCACGGCATCTTGCGAGTCGAAGATCACCTACATCGATGGTGATAACGGAATCCTGCTTCACCGCGGCTACCCGATCGAACAACTGGCCGAGCAGTCCGATTATCTGGAAACCTGCTACCTGCTGCTCAATGGCGAATTGCCAACAGCCGAGCAGAAAGCCCAGTTCGTTGCCGTGGTCAAGAACCACACGATGGTTCACGAACAGCTCAAGACCTTTTTCAACGGCTTCCGTCGTGATGCCCACCCGATGGCCGTCATGTGCGGTGTAGTCGGCGCCC
	7	forest	fern	Equisetum pratense	2020	EG2008_20	CAATTCTGACGGGTACAGTGGGTCCGGACGTGATCGACGTACGCGGTCTCACCGCCACCGGCCGCTTCACATTTGACCCTGGCTTCATGTCCACGGCATCTTGCGAGTCGAAGATCACCTACATCGATGGTGATAACGGAATCCTGCTTCACCGCGGCTACCCGATCGAACAACTGGCCGAGCAGTCCGATTATCTGGAAACCTGCTACCTGCTGCTCAATGGCGAATTGCCAACAGCCGAGCAGAAAGCCCAGTTCGTTGCCGTGGTCAAGAACCACACGATGGTTCACGAACAGCTCAAGACCTTTTTCAACGGCTTCCGTCGTGATGCCCACCCGATGGCCGTCATGTGCGGTGTAGTCGGCGCCC
	7	forest	fern	Equisetum pratense	2020	EG2008_26	CAATTCTGACGGGTACAGTGGGTCCGGACGTGATCGACGTACGCGGTCTCACCGCCACCGGCCGCTTCACATTTGACCCTGGCTTCATGTCCACGGCATCTTGCGAGTCGAAGATCACCTACATCGATGGTGATAACGGAATCCTGCTTCACCGCGGCTACCCGATCGAACAACTGGCCGAGCAGTCCGATTATCTGGAAACCTGCTACCTGCTGCTCAATGGCGAATTGCCAACAGCCGAGCAGAAAGCCCAGTTCGTTGCCGTGGTCAAGAACCACACGATGGTTCACGAACAGCTCAAGACCTTTTTCAACGGCTTCCGTCGTGATGCCCACCCGATGGCCGTCATGTGCGGTGTAGTCGGCGCCC
	7	forest	fern	Equisetum pratense	2020	EG2008_28	CAATTCTGACGGGTACAGTGGGTCCGGACGTGATCGACGTACGCGGTCTCACCGCCACCGGCCGCTTCACATTTGACCCTGGCTTCATGTCCACGGCATCTTGCGAGTCGAAGATCACCTACATCGATGGTGATAACGGAATCCTGCTTCACCGCGGCTACCCGATCGAACAACTGGCCGAGCAGTCCGATTATCTGGAAACCTGCTACCTGCTGCTCAATGGCGAATTGCCAACAGCCGAGCAGAAAGCCCAGTTCGTTGCCGTGGTCAAGAACCACACGATGGTTCACGAACAGCTCAAGACCTTTTTCAACGGCTTCCGTCGTGATGCCCACCCGATGGCCGTCATGTGCGGTGTAGTCGGCGCCC
	7	forest	fern	Equisetum pratense	2020	EG2008_30	CAATTCTGACGGGTACAGTGGGTCCGGACGTGATCGACGTACGCGGTCTCACCGCCACCGGCCGCTTCACATTTGACCCTGGCTTCATGTCCACGGCATCTTGCGAGTCGAAGATCACCTACATCGATGGTGATAACGGAATCCTGCTTCACCGCGGCTACCCGATCGAACAACTGGCCGAGCAGTCCGATTATCTGGAAACCTGCTACCTGCTGCTCAATGGCGAATTGCCAACAGCCGAGCAGAAAGCCCAGTTCGTTGCCGTGGTCAAGAACCACACGATGGTTCACGAACAGCTCAAGACCTTTTTCAACGGCTTCCGTCGTGATGCCCACCCGATGGCCGTCATGTGCGGTGTAGTCGGCGCCC
	8	OroborealAlpineGlacier	plant	wild grasses from mixed stand -location_1	2018	ISL0104	CAATTCTGACGGGTACAGTGGGTCCGGACGTGATCGACGTACGCGGTCTCACCGCCACCGGCCGCTTCACATTTGACCCTGGCTTCATGTCCACGGCATCTTGCGAGTCGAAGATCACCTACATCGATGGTGATAACGGAATCCTGCTTCACCGCGGCTACCCGATCGAACAACTGGCCGAGCAGTCCGATTATCTGGAAACCTGCTATCTGCTGCTAAATGGCGAATTGCCAACAGCCGAGCAAAAAGCCCAGTTCGTTGCCGTGGTCAAGAACCACACGATGGTTCACGAACAGCTCAAGACCTTTTTCAACGGCTTCCGCCGTGATGCCCACCCGATGGCCGTCATGTGCGGCGTAGTCGGCGCCC
	8	OroborealAlpineGlacier	plant	wild grasses from mixed stand -location_1	2018	ISL0119	CAATTCTGACGGGTACAGTGGGTCCGGACGTGATCGACGTACGCGGTCTCACCGCCACCGGCCGCTTCACATTTGACCCTGGCTTCATGTCCACGGCATCTTGCGAGTCGAAGATCACCTACATCGATGGTGATAACGGAATCCTGCTTCACCGCGGCTACCCGATCGAACAACTGGCCGAGCAGTCCGATTATCTGGAAACCTGCTATCTGCTGCTAAATGGCGAATTGCCAACAGCCGAGCAAAAAGCCCAGTTCGTTGCCGTGGTCAAGAACCACACGATGGTTCACGAACAGCTCAAGACCTTTTTCAACGGCTTCCGCCGTGATGCCCACCCGATGGCCGTCATGTGCGGCGTAGTCGGCGCCC
	8	OroborealAlpineGlacier	plant	wild grasses from mixed stand -location_1	2018	ISL0120	CAATTCTGACGGGTACAGTGGGTCCGGACGTGATCGACGTACGCGGTCTCACCGCCACCGGCCGCTTCACATTTGACCCTGGCTTCATGTCCACGGCATCTTGCGAGTCGAAGATCACCTACATCGATGGTGATAACGGAATCCTGCTTCACCGCGGCTACCCGATCGAACAACTGGCCGAGCAGTCCGATTATCTGGAAACCTGCTATCTGCTGCTAAATGGCGAATTGCCAACAGCCGAGCAAAAAGCCCAGTTCGTTGCCGTGGTCAAGAACCACACGATGGTTCACGAACAGCTCAAGACCTTTTTCAACGGCTTCCGCCGTGATGCCCACCCGATGGCCGTCATGTGCGGCGTAGTCGGCGCCC
	8	OroborealAlpineGlacier	plant	wild grasses from mixed stand -location_1	2018	ISL0122	CAATTCTGACGGGTACAGTGGGTCCGGACGTGATCGACGTACGCGGTCTCACCGCCACCGGCCGCTTCACATTTGACCCTGGCTTCATGTCCACGGCATCTTGCGAGTCGAAGATCACCTACATCGATGGTGATAACGGAATCCTGCTTCACCGCGGCTACCCGATCGAACAACTGGCCGAGCAGTCCGATTATCTGGAAACCTGCTATCTGCTGCTAAATGGCGAATTGCCAACAGCCGAGCAAAAAGCCCAGTTCGTTGCCGTGGTCAAGAACCACACGATGGTTCACGAACAGCTCAAGACCTTTTTCAACGGCTTCCGCCGTGATGCCCACCCGATGGCCGTCATGTGCGGCGTAGTCGGCGCCC
	8	OroborealAlpineGlacier	plant	wild grasses from mixed stand -location_1	2018	ISL0123	CAATTCTGACGGGTACAGTGGGTCCGGACGTGATCGACGTACGCGGTCTCACCGCCACCGGCCGCTTCACATTTGACCCTGGCTTCATGTCCACGGCATCTTGCGAGTCGAAGATCACCTACATCGATGGTGATAACGGAATCCTGCTTCACCGCGGCTACCCGATCGAACAACTGGCCGAGCAGTCCGATTATCTGGAAACCTGCTATCTGCTGCTAAATGGCGAATTGCCAACAGCCGAGCAAAAAGCCCAGTTCGTTGCCGTGGTCAAGAACCACACGATGGTTCACGAACAGCTCAAGACCTTTTTCAACGGCTTCCGCCGTGATGCCCACCCGATGGCCGTCATGTGCGGCGTAGTCGGCGCCC
	8	OroborealAlpineGlacier	plant	wild grasses from mixed stand -location_1	2018	ISL0128	CAATTCTGACGGGTACAGTGGGTCCGGACGTGATCGACGTACGCGGTCTCACCGCCACCGGCCGCTTCACATTTGACCCTGGCTTCATGTCCACGGCATCTTGCGAGTCGAAGATCACCTACATCGATGGTGATAACGGAATCCTGCTTCACCGCGGCTACCCGATCGAACAACTGGCCGAGCAGTCCGATTATCTGGAAACCTGCTATCTGCTGCTAAATGGCGAATTGCCAACAGCCGAGCAAAAAGCCCAGTTCGTTGCCGTGGTCAAGAACCACACGATGGTTCACGAACAGCTCAAGACCTTTTTCAACGGCTTCCGCCGTGATGCCCACCCGATGGCCGTCATGTGCGGCGTAGTCGGCGCCC
	8	OroborealAlpineGlacier	plant	wild grasses from mixed stand -location_1	2018	ISL0131	CAATTCTGACGGGTACAGTGGGTCCGGACGTGATCGACGTACGCGGTCTCACCGCCACCGGCCGCTTCACATTTGACCCTGGCTTCATGTCCACGGCATCTTGCGAGTCGAAGATCACCTACATCGATGGTGATAACGGAATCCTGCTTCACCGCGGCTACCCGATCGAACAACTGGCCGAGCAGTCCGATTATCTGGAAACCTGCTATCTGCTGCTAAATGGCGAATTGCCAACAGCCGAGCAAAAAGCCCAGTTCGTTGCCGTGGTCAAGAACCACACGATGGTTCACGAACAGCTCAAGACCTTTTTCAACGGCTTCCGCCGTGATGCCCACCCGATGGCCGTCATGTGCGGCGTAGTCGGCGCCC
	8	OroborealAlpineGlacier	plant	wild grasses from mixed stand -location_1	2018	ISL0132	CAATTCTGACGGGTACAGTGGGTCCGGACGTGATCGACGTACGCGGTCTCACCGCCACCGGCCGCTTCACATTTGACCCTGGCTTCATGTCCACGGCATCTTGCGAGTCGAAGATCACCTACATCGATGGTGATAACGGAATCCTGCTTCACCGCGGCTACCCGATCGAACAACTGGCCGAGCAGTCCGATTATCTGGAAACCTGCTATCTGCTGCTAAATGGCGAATTGCCAACAGCCGAGCAAAAAGCCCAGTTCGTTGCCGTGGTCAAGAACCACACGATGGTTCACGAACAGCTCAAGACCTTTTTCAACGGCTTCCGCCGTGATGCCCACCCGATGGCCGTCATGTGCGGCGTAGTCGGCGCCC
	9	BoreoHeathMossGrass	plant	Alchemilla alpina	2020	HV2005_06	CAATTCTGACGGGTACAGTGGGTCCGGACGTGATCGACGTACGCGGTCTCACCGCCACCGGCCGCTTCACATTTGACCCTGGCTTCATGTCCACGGCATCTTGCGAGTCGAAGATCACCTACATCGATGGTGATAACGGAATCCTGCTTCACCGCGGCTACCCGATCGAACAACTGGCCGAGCAGTCCGATTATCTGGAAACCTGCTACCTGCTGCTAAATGGCGAATTGCCAACAGCCGAGCAAAAAGCCCAGTTCGTTGCCGTGGTCAAGAACCACACGATGGTTCACGAACAGCTCAAGACCTTTTTCAACGGCTTCCGCCGTGATGCCCACCCGATGGCCGTCATGTGCGGCGTAGTCGGCGCCC
	9	BoreoHeathMossGrass	plant	Alchemilla alpina	2020	HV2005_07	CAATTCTGACGGGTACAGTGGGTCCGGACGTGATCGACGTACGCGGTCTCACCGCCACCGGCCGCTTCACATTTGACCCTGGCTTCATGTCCACGGCATCTTGCGAGTCGAAGATCACCTACATCGATGGTGATAACGGAATCCTGCTTCACCGCGGCTACCCGATCGAACAACTGGCCGAGCAGTCCGATTATCTGGAAACCTGCTACCTGCTGCTAAATGGCGAATTGCCAACAGCCGAGCAAAAAGCCCAGTTCGTTGCCGTGGTCAAGAACCACACGATGGTTCACGAACAGCTCAAGACCTTTTTCAACGGCTTCCGCCGTGATGCCCACCCGATGGCCGTCATGTGCGGCGTAGTCGGCGCCC
	9	BoreoHeathMossGrass	plant	Alchemilla alpina	2020	HV2005_25	CAATTCTGACGGGTACAGTGGGTCCGGACGTGATCGACGTACGCGGTCTCACCGCCACCGGCCGCTTCACATTTGACCCTGGCTTCATGTCCACGGCATCTTGCGAGTCGAAGATCACCTACATCGATGGTGATAACGGAATCCTGCTTCACCGCGGCTACCCGATCGAACAACTGGCCGAGCAGTCCGATTATCTGGAAACCTGCTACCTGCTGCTAAATGGCGAATTGCCAACAGCCGAGCAAAAAGCCCAGTTCGTTGCCGTGGTCAAGAACCACACGATGGTTCACGAACAGCTCAAGACCTTTTTCAACGGCTTCCGCCGTGATGCCCACCCGATGGCCGTCATGTGCGGCGTAGTCGGCGCCC
	9	BoreoHeathMossGrass	plant	Alchemilla alpina	2020	HV2005_26	CAATTCTGACGGGTACAGTGGGTCCGGACGTGATCGACGTACGCGGTCTCACCGCCACCGGCCGCTTCACATTTGACCCTGGCTTCATGTCCACGGCATCTTGCGAGTCGAAGATCACCTACATCGATGGTGATAACGGAATCCTGCTTCACCGCGGCTACCCGATCGAACAACTGGCCGAGCAGTCCGATTATCTGGAAACCTGCTACCTGCTGCTAAATGGCGAATTGCCAACAGCCGAGCAAAAAGCCCAGTTCGTTGCCGTGGTCAAGAACCACACGATGGTTCACGAACAGCTCAAGACCTTTTTCAACGGCTTCCGCCGTGATGCCCACCCGATGGCCGTCATGTGCGGCGTAGTCGGCGCCC
	9	OroborealAlpineGlacier	plant	wild grasses from mixed stand -location_1	2018	ISL0100	CAATTCTGACGGGTACAGTGGGTCCGGACGTGATCGACGTACGCGGTCTCACCGCCACCGGCCGCTTCACATTTGACCCTGGCTTCATGTCCACGGCATCTTGCGAGTCGAAGATCACCTACATCGATGGTGATAACGGAATCCTGCTTCACCGCGGCTACCCGATCGAACAACTGGCCGAGCAGTCCGATTATCTGGAAACCTGCTACCTGCTGCTAAATGGCGAATTGCCAACAGCCGAGCAAAAAGCCCAGTTCGTTGCCGTGGTCAAGAACCACACGATGGTTCACGAACAGCTCAAGACCTTTTTCAACGGCTTCCGCCGTGATGCCCACCCGATGGCCGTCATGTGCGGCGTAGTCGGCGCCC
	9	OroborealAlpineGlacier	plant	wild grasses from mixed stand -location_1	2018	ISL0101	CAATTCTGACGGGTACAGTGGGTCCGGACGTGATCGACGTACGCGGTCTCACCGCCACCGGCCGCTTCACATTTGACCCTGGCTTCATGTCCACGGCATCTTGCGAGTCGAAGATCACCTACATCGATGGTGATAACGGAATCCTGCTTCACCGCGGCTACCCGATCGAACAACTGGCCGAGCAGTCCGATTATCTGGAAACCTGCTACCTGCTGCTAAATGGCGAATTGCCAACAGCCGAGCAAAAAGCCCAGTTCGTTGCCGTGGTCAAGAACCACACGATGGTTCACGAACAGCTCAAGACCTTTTTCAACGGCTTCCGCCGTGATGCCCACCCGATGGCCGTCATGTGCGGCGTAGTCGGCGCCC
	9	OroborealAlpineGlacier	plant	wild grasses from mixed stand -location_1	2018	ISL0103	CAATTCTGACGGGTACAGTGGGTCCGGACGTGATCGACGTACGCGGTCTCACCGCCACCGGCCGCTTCACATTTGACCCTGGCTTCATGTCCACGGCATCTTGCGAGTCGAAGATCACCTACATCGATGGTGATAACGGAATCCTGCTTCACCGCGGCTACCCGATCGAACAACTGGCCGAGCAGTCCGATTATCTGGAAACCTGCTACCTGCTGCTAAATGGCGAATTGCCAACAGCCGAGCAAAAAGCCCAGTTCGTTGCCGTGGTCAAGAACCACACGATGGTTCACGAACAGCTCAAGACCTTTTTCAACGGCTTCCGCCGTGATGCCCACCCGATGGCCGTCATGTGCGGCGTAGTCGGCGCCC
	9	OroborealAlpineGlacier	plant	wild grasses from mixed stand -location_1	2018	ISL0105	CAATTCTGACGGGTACAGTGGGTCCGGACGTGATCGACGTACGCGGTCTCACCGCCACCGGCCGCTTCACATTTGACCCTGGCTTCATGTCCACGGCATCTTGCGAGTCGAAGATCACCTACATCGATGGTGATAACGGAATCCTGCTTCACCGCGGCTACCCGATCGAACAACTGGCCGAGCAGTCCGATTATCTGGAAACCTGCTACCTGCTGCTAAATGGCGAATTGCCAACAGCCGAGCAAAAAGCCCAGTTCGTTGCCGTGGTCAAGAACCACACGATGGTTCACGAACAGCTCAAGACCTTTTTCAACGGCTTCCGCCGTGATGCCCACCCGATGGCCGTCATGTGCGGCGTAGTCGGCGCCC
	9	OroborealAlpineGlacier	plant	wild grasses from mixed stand -location_1	2018	ISL0106	CAATTCTGACGGGTACAGTGGGTCCGGACGTGATCGACGTACGCGGTCTCACCGCCACCGGCCGCTTCACATTTGACCCTGGCTTCATGTCCACGGCATCTTGCGAGTCGAAGATCACCTACATCGATGGTGATAACGGAATCCTGCTTCACCGCGGCTACCCGATCGAACAACTGGCCGAGCAGTCCGATTATCTGGAAACCTGCTACCTGCTGCTAAATGGCGAATTGCCAACAGCCGAGCAAAAAGCCCAGTTCGTTGCCGTGGTCAAGAACCACACGATGGTTCACGAACAGCTCAAGACCTTTTTCAACGGCTTCCGCCGTGATGCCCACCCGATGGCCGTCATGTGCGGCGTAGTCGGCGCCC
	9	OroborealAlpineGlacier	plant	wild grasses from mixed stand -location_1	2018	ISL0108	CAATTCTGACGGGTACAGTGGGTCCGGACGTGATCGACGTACGCGGTCTCACCGCCACCGGCCGCTTCACATTTGACCCTGGCTTCATGTCCACGGCATCTTGCGAGTCGAAGATCACCTACATCGATGGTGATAACGGAATCCTGCTTCACCGCGGCTACCCGATCGAACAACTGGCCGAGCAGTCCGATTATCTGGAAACCTGCTACCTGCTGCTAAATGGCGAATTGCCAACAGCCGAGCAAAAAGCCCAGTTCGTTGCCGTGGTCAAGAACCACACGATGGTTCACGAACAGCTCAAGACCTTTTTCAACGGCTTCCGCCGTGATGCCCACCCGATGGCCGTCATGTGCGGCGTAGTCGGCGCCC
	9	OroborealAlpineGlacier	plant	wild grasses from mixed stand -location_1	2018	ISL0109	CAATTCTGACGGGTACAGTGGGTCCGGACGTGATCGACGTACGCGGTCTCACCGCCACCGGCCGCTTCACATTTGACCCTGGCTTCATGTCCACGGCATCTTGCGAGTCGAAGATCACCTACATCGATGGTGATAACGGAATCCTGCTTCACCGCGGCTACCCGATCGAACAACTGGCCGAGCAGTCCGATTATCTGGAAACCTGCTACCTGCTGCTAAATGGCGAATTGCCAACAGCCGAGCAAAAAGCCCAGTTCGTTGCCGTGGTCAAGAACCACACGATGGTTCACGAACAGCTCAAGACCTTTTTCAACGGCTTCCGCCGTGATGCCCACCCGATGGCCGTCATGTGCGGCGTAGTCGGCGCCC
	9	OroborealAlpineGlacier	plant	wild grasses from mixed stand -location_1	2018	ISL0110	CAATTCTGACGGGTACAGTGGGTCCGGACGTGATCGACGTACGCGGTCTCACCGCCACCGGCCGCTTCACATTTGACCCTGGCTTCATGTCCACGGCATCTTGCGAGTCGAAGATCACCTACATCGATGGTGATAACGGAATCCTGCTTCACCGCGGCTACCCGATCGAACAACTGGCCGAGCAGTCCGATTATCTGGAAACCTGCTACCTGCTGCTAAATGGCGAATTGCCAACAGCCGAGCAAAAAGCCCAGTTCGTTGCCGTGGTCAAGAACCACACGATGGTTCACGAACAGCTCAAGACCTTTTTCAACGGCTTCCGCCGTGATGCCCACCCGATGGCCGTCATGTGCGGCGTAGTCGGCGCCC
	9	OroborealAlpineGlacier	plant	wild grasses from mixed stand -location_1	2018	ISL0112	CAATTCTGACGGGTACAGTGGGTCCGGACGTGATCGACGTACGCGGTCTCACCGCCACCGGCCGCTTCACATTTGACCCTGGCTTCATGTCCACGGCATCTTGCGAGTCGAAGATCACCTACATCGATGGTGATAACGGAATCCTGCTTCACCGCGGCTACCCGATCGAACAACTGGCCGAGCAGTCCGATTATCTGGAAACCTGCTACCTGCTGCTAAATGGCGAATTGCCAACAGCCGAGCAAAAAGCCCAGTTCGTTGCCGTGGTCAAGAACCACACGATGGTTCACGAACAGCTCAAGACCTTTTTCAACGGCTTCCGCCGTGATGCCCACCCGATGGCCGTCATGTGCGGCGTAGTCGGCGCCC
	9	OroborealAlpineGlacier	plant	wild grasses from mixed stand -location_1	2018	ISL0114	CAATTCTGACGGGTACAGTGGGTCCGGACGTGATCGACGTACGCGGTCTCACCGCCACCGGCCGCTTCACATTTGACCCTGGCTTCATGTCCACGGCATCTTGCGAGTCGAAGATCACCTACATCGATGGTGATAACGGAATCCTGCTTCACCGCGGCTACCCGATCGAACAACTGGCCGAGCAGTCCGATTATCTGGAAACCTGCTACCTGCTGCTAAATGGCGAATTGCCAACAGCCGAGCAAAAAGCCCAGTTCGTTGCCGTGGTCAAGAACCACACGATGGTTCACGAACAGCTCAAGACCTTTTTCAACGGCTTCCGCCGTGATGCCCACCCGATGGCCGTCATGTGCGGCGTAGTCGGCGCCC
	9	OroborealAlpineGlacier	plant	wild grasses from mixed stand -location_1	2018	ISL0116	CAATTCTGACGGGTACAGTGGGTCCGGACGTGATCGACGTACGCGGTCTCACCGCCACCGGCCGCTTCACATTTGACCCTGGCTTCATGTCCACGGCATCTTGCGAGTCGAAGATCACCTACATCGATGGTGATAACGGAATCCTGCTTCACCGCGGCTACCCGATCGAACAACTGGCCGAGCAGTCCGATTATCTGGAAACCTGCTACCTGCTGCTAAATGGCGAATTGCCAACAGCCGAGCAAAAAGCCCAGTTCGTTGCCGTGGTCAAGAACCACACGATGGTTCACGAACAGCTCAAGACCTTTTTCAACGGCTTCCGCCGTGATGCCCACCCGATGGCCGTCATGTGCGGCGTAGTCGGCGCCC
	9	OroborealAlpineGlacier	plant	wild grasses from mixed stand -location_1	2018	ISL0118	CAATTCTGACGGGTACAGTGGGTCCGGACGTGATCGACGTACGCGGTCTCACCGCCACCGGCCGCTTCACATTTGACCCTGGCTTCATGTCCACGGCATCTTGCGAGTCGAAGATCACCTACATCGATGGTGATAACGGAATCCTGCTTCACCGCGGCTACCCGATCGAACAACTGGCCGAGCAGTCCGATTATCTGGAAACCTGCTACCTGCTGCTAAATGGCGAATTGCCAACAGCCGAGCAAAAAGCCCAGTTCGTTGCCGTGGTCAAGAACCACACGATGGTTCACGAACAGCTCAAGACCTTTTTCAACGGCTTCCGCCGTGATGCCCACCCGATGGCCGTCATGTGCGGCGTAGTCGGCGCCC
	9	OroborealAlpineGlacier	plant	wild grasses from mixed stand -location_1	2018	ISL0121	CAATTCTGACGGGTACAGTGGGTCCGGACGTGATCGACGTACGCGGTCTCACCGCCACCGGCCGCTTCACATTTGACCCTGGCTTCATGTCCACGGCATCTTGCGAGTCGAAGATCACCTACATCGATGGTGATAACGGAATCCTGCTTCACCGCGGCTACCCGATCGAACAACTGGCCGAGCAGTCCGATTATCTGGAAACCTGCTACCTGCTGCTAAATGGCGAATTGCCAACAGCCGAGCAAAAAGCCCAGTTCGTTGCCGTGGTCAAGAACCACACGATGGTTCACGAACAGCTCAAGACCTTTTTCAACGGCTTCCGCCGTGATGCCCACCCGATGGCCGTCATGTGCGGCGTAGTCGGCGCCC
	9	OroborealAlpineGlacier	plant	wild grasses from mixed stand -location_1	2018	ISL0125	CAATTCTGACGGGTACAGTGGGTCCGGACGTGATCGACGTACGCGGTCTCACCGCCACCGGCCGCTTCACATTTGACCCTGGCTTCATGTCCACGGCATCTTGCGAGTCGAAGATCACCTACATCGATGGTGATAACGGAATCCTGCTTCACCGCGGCTACCCGATCGAACAACTGGCCGAGCAGTCCGATTATCTGGAAACCTGCTACCTGCTGCTAAATGGCGAATTGCCAACAGCCGAGCAAAAAGCCCAGTTCGTTGCCGTGGTCAAGAACCACACGATGGTTCACGAACAGCTCAAGACCTTTTTCAACGGCTTCCGCCGTGATGCCCACCCGATGGCCGTCATGTGCGGCGTAGTCGGCGCCC
	9	OroborealAlpineGlacier	plant	wild grasses from mixed stand -location_1	2018	ISL0126	CAATTCTGACGGGTACAGTGGGTCCGGACGTGATCGACGTACGCGGTCTCACCGCCACCGGCCGCTTCACATTTGACCCTGGCTTCATGTCCACGGCATCTTGCGAGTCGAAGATCACCTACATCGATGGTGATAACGGAATCCTGCTTCACCGCGGCTACCCGATCGAACAACTGGCCGAGCAGTCCGATTATCTGGAAACCTGCTACCTGCTGCTAAATGGCGAATTGCCAACAGCCGAGCAAAAAGCCCAGTTCGTTGCCGTGGTCAAGAACCACACGATGGTTCACGAACAGCTCAAGACCTTTTTCAACGGCTTCCGCCGTGATGCCCACCCGATGGCCGTCATGTGCGGCGTAGTCGGCGCCC
	9	OroborealAlpineGlacier	plant	wild grasses from mixed stand -location_1	2018	ISL0129	CAATTCTGACGGGTACAGTGGGTCCGGACGTGATCGACGTACGCGGTCTCACCGCCACCGGCCGCTTCACATTTGACCCTGGCTTCATGTCCACGGCATCTTGCGAGTCGAAGATCACCTACATCGATGGTGATAACGGAATCCTGCTTCACCGCGGCTACCCGATCGAACAACTGGCCGAGCAGTCCGATTATCTGGAAACCTGCTACCTGCTGCTAAATGGCGAATTGCCAACAGCCGAGCAAAAAGCCCAGTTCGTTGCCGTGGTCAAGAACCACACGATGGTTCACGAACAGCTCAAGACCTTTTTCAACGGCTTCCGCCGTGATGCCCACCCGATGGCCGTCATGTGCGGCGTAGTCGGCGCCC
	9	OroborealAlpineGlacier	plant	wild grasses from mixed stand -location_1	2018	ISL0130	CAATTCTGACGGGTACAGTGGGTCCGGACGTGATCGACGTACGCGGTCTCACCGCCACCGGCCGCTTCACATTTGACCCTGGCTTCATGTCCACGGCATCTTGCGAGTCGAAGATCACCTACATCGATGGTGATAACGGAATCCTGCTTCACCGCGGCTACCCGATCGAACAACTGGCCGAGCAGTCCGATTATCTGGAAACCTGCTACCTGCTGCTAAATGGCGAATTGCCAACAGCCGAGCAAAAAGCCCAGTTCGTTGCCGTGGTCAAGAACCACACGATGGTTCACGAACAGCTCAAGACCTTTTTCAACGGCTTCCGCCGTGATGCCCACCCGATGGCCGTCATGTGCGGCGTAGTCGGCGCCC
	9	BoreoHeathMossGrass	plant	wild grasses from mixed stand -location_2	2018	ISL0181	CAATTCTGACGGGTACAGTGGGTCCGGACGTGATCGACGTACGCGGTCTCACCGCCACCGGCCGCTTCACATTTGACCCTGGCTTCATGTCCACGGCATCTTGCGAGTCGAAGATCACCTACATCGATGGTGATAACGGAATCCTGCTTCACCGCGGCTACCCGATCGAACAACTGGCCGAGCAGTCCGATTATCTGGAAACCTGCTACCTGCTGCTAAATGGCGAATTGCCAACAGCCGAGCAAAAAGCCCAGTTCGTTGCCGTGGTCAAGAACCACACGATGGTTCACGAACAGCTCAAGACCTTTTTCAACGGCTTCCGCCGTGATGCCCACCCGATGGCCGTCATGTGCGGCGTAGTCGGCGCCC
	9	BoreoHeathMossGrass	plant	wild grasses from mixed stand -location_2	2018	ISL0185	CAATTCTGACGGGTACAGTGGGTCCGGACGTGATCGACGTACGCGGTCTCACCGCCACCGGCCGCTTCACATTTGACCCTGGCTTCATGTCCACGGCATCTTGCGAGTCGAAGATCACCTACATCGATGGTGATAACGGAATCCTGCTTCACCGCGGCTACCCGATCGAACAACTGGCCGAGCAGTCCGATTATCTGGAAACCTGCTACCTGCTGCTAAATGGCGAATTGCCAACAGCCGAGCAAAAAGCCCAGTTCGTTGCCGTGGTCAAGAACCACACGATGGTTCACGAACAGCTCAAGACCTTTTTCAACGGCTTCCGCCGTGATGCCCACCCGATGGCCGTCATGTGCGGCGTAGTCGGCGCCC
	9	BoreoHeathMossGrass	plant	wild grasses from mixed stand -location_2	2018	ISL0187	CAATTCTGACGGGTACAGTGGGTCCGGACGTGATCGACGTACGCGGTCTCACCGCCACCGGCCGCTTCACATTTGACCCTGGCTTCATGTCCACGGCATCTTGCGAGTCGAAGATCACCTACATCGATGGTGATAACGGAATCCTGCTTCACCGCGGCTACCCGATCGAACAACTGGCCGAGCAGTCCGATTATCTGGAAACCTGCTACCTGCTGCTAAATGGCGAATTGCCAACAGCCGAGCAAAAAGCCCAGTTCGTTGCCGTGGTCAAGAACCACACGATGGTTCACGAACAGCTCAAGACCTTTTTCAACGGCTTCCGCCGTGATGCCCACCCGATGGCCGTCATGTGCGGCGTAGTCGGCGCCC
	9	BoreoHeathMossGrass	plant	wild grasses from mixed stand -location_2	2018	ISL0189	CAATTCTGACGGGTACAGTGGGTCCGGACGTGATCGACGTACGCGGTCTCACCGCCACCGGCCGCTTCACATTTGACCCTGGCTTCATGTCCACGGCATCTTGCGAGTCGAAGATCACCTACATCGATGGTGATAACGGAATCCTGCTTCACCGCGGCTACCCGATCGAACAACTGGCCGAGCAGTCCGATTATCTGGAAACCTGCTACCTGCTGCTAAATGGCGAATTGCCAACAGCCGAGCAAAAAGCCCAGTTCGTTGCCGTGGTCAAGAACCACACGATGGTTCACGAACAGCTCAAGACCTTTTTCAACGGCTTCCGCCGTGATGCCCACCCGATGGCCGTCATGTGCGGCGTAGTCGGCGCCC
	9	BoreoHeathMossGrass	plant	wild grasses from mixed stand -location_2	2018	ISL0190	CAATTCTGACGGGTACAGTGGGTCCGGACGTGATCGACGTACGCGGTCTCACCGCCACCGGCCGCTTCACATTTGACCCTGGCTTCATGTCCACGGCATCTTGCGAGTCGAAGATCACCTACATCGATGGTGATAACGGAATCCTGCTTCACCGCGGCTACCCGATCGAACAACTGGCCGAGCAGTCCGATTATCTGGAAACCTGCTACCTGCTGCTAAATGGCGAATTGCCAACAGCCGAGCAAAAAGCCCAGTTCGTTGCCGTGGTCAAGAACCACACGATGGTTCACGAACAGCTCAAGACCTTTTTCAACGGCTTCCGCCGTGATGCCCACCCGATGGCCGTCATGTGCGGCGTAGTCGGCGCCC
	9	BoreoHeathMossGrass	plant	wild grasses from mixed stand -location_2	2018	ISL0192	CAATTCTGACGGGTACAGTGGGTCCGGACGTGATCGACGTACGCGGTCTCACCGCCACCGGCCGCTTCACATTTGACCCTGGCTTCATGTCCACGGCATCTTGCGAGTCGAAGATCACCTACATCGATGGTGATAACGGAATCCTGCTTCACCGCGGCTACCCGATCGAACAACTGGCCGAGCAGTCCGATTATCTGGAAACCTGCTACCTGCTGCTAAATGGCGAATTGCCAACAGCCGAGCAAAAAGCCCAGTTCGTTGCCGTGGTCAAGAACCACACGATGGTTCACGAACAGCTCAAGACCTTTTTCAACGGCTTCCGCCGTGATGCCCACCCGATGGCCGTCATGTGCGGCGTAGTCGGCGCCC
	9	BoreoHeathMossGrass	plant	wild grasses from mixed stand -location_2	2018	ISL0193	CAATTCTGACGGGTACAGTGGGTCCGGACGTGATCGACGTACGCGGTCTCACCGCCACCGGCCGCTTCACATTTGACCCTGGCTTCATGTCCACGGCATCTTGCGAGTCGAAGATCACCTACATCGATGGTGATAACGGAATCCTGCTTCACCGCGGCTACCCGATCGAACAACTGGCCGAGCAGTCCGATTATCTGGAAACCTGCTACCTGCTGCTAAATGGCGAATTGCCAACAGCCGAGCAAAAAGCCCAGTTCGTTGCCGTGGTCAAGAACCACACGATGGTTCACGAACAGCTCAAGACCTTTTTCAACGGCTTCCGCCGTGATGCCCACCCGATGGCCGTCATGTGCGGCGTAGTCGGCGCCC
	9	BoreoHeathMossGrass	plant	wild grasses from mixed stand -location_2	2018	ISL0197	CAATTCTGACGGGTACAGTGGGTCCGGACGTGATCGACGTACGCGGTCTCACCGCCACCGGCCGCTTCACATTTGACCCTGGCTTCATGTCCACGGCATCTTGCGAGTCGAAGATCACCTACATCGATGGTGATAACGGAATCCTGCTTCACCGCGGCTACCCGATCGAACAACTGGCCGAGCAGTCCGATTATCTGGAAACCTGCTACCTGCTGCTAAATGGCGAATTGCCAACAGCCGAGCAAAAAGCCCAGTTCGTTGCCGTGGTCAAGAACCACACGATGGTTCACGAACAGCTCAAGACCTTTTTCAACGGCTTCCGCCGTGATGCCCACCCGATGGCCGTCATGTGCGGCGTAGTCGGCGCCC
	9	BoreoHeathMossGrass	plant	wild grasses from mixed stand -location_2	2018	ISL0199	CAATTCTGACGGGTACAGTGGGTCCGGACGTGATCGACGTACGCGGTCTCACCGCCACCGGCCGCTTCACATTTGACCCTGGCTTCATGTCCACGGCATCTTGCGAGTCGAAGATCACCTACATCGATGGTGATAACGGAATCCTGCTTCACCGCGGCTACCCGATCGAACAACTGGCCGAGCAGTCCGATTATCTGGAAACCTGCTACCTGCTGCTAAATGGCGAATTGCCAACAGCCGAGCAAAAAGCCCAGTTCGTTGCCGTGGTCAAGAACCACACGATGGTTCACGAACAGCTCAAGACCTTTTTCAACGGCTTCCGCCGTGATGCCCACCCGATGGCCGTCATGTGCGGCGTAGTCGGCGCCC
	9	BoreoHeathMossGrass	plant	wild grasses from mixed stand -location_2	2018	ISL0200	CAATTCTGACGGGTACAGTGGGTCCGGACGTGATCGACGTACGCGGTCTCACCGCCACCGGCCGCTTCACATTTGACCCTGGCTTCATGTCCACGGCATCTTGCGAGTCGAAGATCACCTACATCGATGGTGATAACGGAATCCTGCTTCACCGCGGCTACCCGATCGAACAACTGGCCGAGCAGTCCGATTATCTGGAAACCTGCTACCTGCTGCTAAATGGCGAATTGCCAACAGCCGAGCAAAAAGCCCAGTTCGTTGCCGTGGTCAAGAACCACACGATGGTTCACGAACAGCTCAAGACCTTTTTCAACGGCTTCCGCCGTGATGCCCACCCGATGGCCGTCATGTGCGGCGTAGTCGGCGCCC
	9	BoreoHeathMossGrass	plant	wild grasses from mixed stand -location_2	2018	ISL0202	CAATTCTGACGGGTACAGTGGGTCCGGACGTGATCGACGTACGCGGTCTCACCGCCACCGGCCGCTTCACATTTGACCCTGGCTTCATGTCCACGGCATCTTGCGAGTCGAAGATCACCTACATCGATGGTGATAACGGAATCCTGCTTCACCGCGGCTACCCGATCGAACAACTGGCCGAGCAGTCCGATTATCTGGAAACCTGCTACCTGCTGCTAAATGGCGAATTGCCAACAGCCGAGCAAAAAGCCCAGTTCGTTGCCGTGGTCAAGAACCACACGATGGTTCACGAACAGCTCAAGACCTTTTTCAACGGCTTCCGCCGTGATGCCCACCCGATGGCCGTCATGTGCGGCGTAGTCGGCGCCC
	9	BoreoHeathMossGrass	plant	wild grasses from mixed stand -location_2	2018	ISL0203	CAATTCTGACGGGTACAGTGGGTCCGGACGTGATCGACGTACGCGGTCTCACCGCCACCGGCCGCTTCACATTTGACCCTGGCTTCATGTCCACGGCATCTTGCGAGTCGAAGATCACCTACATCGATGGTGATAACGGAATCCTGCTTCACCGCGGCTACCCGATCGAACAACTGGCCGAGCAGTCCGATTATCTGGAAACCTGCTACCTGCTGCTAAATGGCGAATTGCCAACAGCCGAGCAAAAAGCCCAGTTCGTTGCCGTGGTCAAGAACCACACGATGGTTCACGAACAGCTCAAGACCTTTTTCAACGGCTTCCGCCGTGATGCCCACCCGATGGCCGTCATGTGCGGCGTAGTCGGCGCCC
	9	BoreoHeathMossGrass	moss	moss from mixed stand - location_2	2018	ISL0210	CAATTCTGACGGGTACAGTGGGTCCGGACGTGATCGACGTACGCGGTCTCACCGCCACCGGCCGCTTCACATTTGACCCTGGCTTCATGTCCACGGCATCTTGCGAGTCGAAGATCACCTACATCGATGGTGATAACGGAATCCTGCTTCACCGCGGCTACCCGATCGAACAACTGGCCGAGCAGTCCGATTATCTGGAAACCTGCTACCTGCTGCTAAATGGCGAATTGCCAACAGCCGAGCAAAAAGCCCAGTTCGTTGCCGTGGTCAAGAACCACACGATGGTTCACGAACAGCTCAAGACCTTTTTCAACGGCTTCCGCCGTGATGCCCACCCGATGGCCGTCATGTGCGGCGTAGTCGGCGCCC
	9	BoreoHeathMossGrass	moss	moss from mixed stand - location_2	2018	ISL0211	CAATTCTGACGGGTACAGTGGGTCCGGACGTGATCGACGTACGCGGTCTCACCGCCACCGGCCGCTTCACATTTGACCCTGGCTTCATGTCCACGGCATCTTGCGAGTCGAAGATCACCTACATCGATGGTGATAACGGAATCCTGCTTCACCGCGGCTACCCGATCGAACAACTGGCCGAGCAGTCCGATTATCTGGAAACCTGCTACCTGCTGCTAAATGGCGAATTGCCAACAGCCGAGCAAAAAGCCCAGTTCGTTGCCGTGGTCAAGAACCACACGATGGTTCACGAACAGCTCAAGACCTTTTTCAACGGCTTCCGCCGTGATGCCCACCCGATGGCCGTCATGTGCGGCGTAGTCGGCGCCC
	9	BoreoHeathMossGrass	moss	moss from mixed stand - location_2	2018	ISL0214	CAATTCTGACGGGTACAGTGGGTCCGGACGTGATCGACGTACGCGGTCTCACCGCCACCGGCCGCTTCACATTTGACCCTGGCTTCATGTCCACGGCATCTTGCGAGTCGAAGATCACCTACATCGATGGTGATAACGGAATCCTGCTTCACCGCGGCTACCCGATCGAACAACTGGCCGAGCAGTCCGATTATCTGGAAACCTGCTACCTGCTGCTAAATGGCGAATTGCCAACAGCCGAGCAAAAAGCCCAGTTCGTTGCCGTGGTCAAGAACCACACGATGGTTCACGAACAGCTCAAGACCTTTTTCAACGGCTTCCGCCGTGATGCCCACCCGATGGCCGTCATGTGCGGCGTAGTCGGCGCCC
	9	BoreoHeathMossGrass	moss	moss from mixed stand - location_2	2018	ISL0217	CAATTCTGACGGGTACAGTGGGTCCGGACGTGATCGACGTACGCGGTCTCACCGCCACCGGCCGCTTCACATTTGACCCTGGCTTCATGTCCACGGCATCTTGCGAGTCGAAGATCACCTACATCGATGGTGATAACGGAATCCTGCTTCACCGCGGCTACCCGATCGAACAACTGGCCGAGCAGTCCGATTATCTGGAAACCTGCTACCTGCTGCTAAATGGCGAATTGCCAACAGCCGAGCAAAAAGCCCAGTTCGTTGCCGTGGTCAAGAACCACACGATGGTTCACGAACAGCTCAAGACCTTTTTCAACGGCTTCCGCCGTGATGCCCACCCGATGGCCGTCATGTGCGGCGTAGTCGGCGCCC
	9	BoreoHeathMossGrass	moss	moss from mixed stand - location_2	2018	ISL0218	CAATTCTGACGGGTACAGTGGGTCCGGACGTGATCGACGTACGCGGTCTCACCGCCACCGGCCGCTTCACATTTGACCCTGGCTTCATGTCCACGGCATCTTGCGAGTCGAAGATCACCTACATCGATGGTGATAACGGAATCCTGCTTCACCGCGGCTACCCGATCGAACAACTGGCCGAGCAGTCCGATTATCTGGAAACCTGCTACCTGCTGCTAAATGGCGAATTGCCAACAGCCGAGCAAAAAGCCCAGTTCGTTGCCGTGGTCAAGAACCACACGATGGTTCACGAACAGCTCAAGACCTTTTTCAACGGCTTCCGCCGTGATGCCCACCCGATGGCCGTCATGTGCGGCGTAGTCGGCGCCC
	9	BoreoHeathMossGrass	moss	moss from mixed stand - location_2	2018	ISL0219	CAATTCTGACGGGTACAGTGGGTCCGGACGTGATCGACGTACGCGGTCTCACCGCCACCGGCCGCTTCACATTTGACCCTGGCTTCATGTCCACGGCATCTTGCGAGTCGAAGATCACCTACATCGATGGTGATAACGGAATCCTGCTTCACCGCGGCTACCCGATCGAACAACTGGCCGAGCAGTCCGATTATCTGGAAACCTGCTACCTGCTGCTAAATGGCGAATTGCCAACAGCCGAGCAAAAAGCCCAGTTCGTTGCCGTGGTCAAGAACCACACGATGGTTCACGAACAGCTCAAGACCTTTTTCAACGGCTTCCGCCGTGATGCCCACCCGATGGCCGTCATGTGCGGCGTAGTCGGCGCCC
	9	BoreoHeathMossGrass	moss	moss from mixed stand - location_2	2018	ISL0220	CAATTCTGACGGGTACAGTGGGTCCGGACGTGATCGACGTACGCGGTCTCACCGCCACCGGCCGCTTCACATTTGACCCTGGCTTCATGTCCACGGCATCTTGCGAGTCGAAGATCACCTACATCGATGGTGATAACGGAATCCTGCTTCACCGCGGCTACCCGATCGAACAACTGGCCGAGCAGTCCGATTATCTGGAAACCTGCTACCTGCTGCTAAATGGCGAATTGCCAACAGCCGAGCAAAAAGCCCAGTTCGTTGCCGTGGTCAAGAACCACACGATGGTTCACGAACAGCTCAAGACCTTTTTCAACGGCTTCCGCCGTGATGCCCACCCGATGGCCGTCATGTGCGGCGTAGTCGGCGCCC
	9	BoreoHeathMossGrass	moss	moss from mixed stand - location_2	2018	ISL0221	CAATTCTGACGGGTACAGTGGGTCCGGACGTGATCGACGTACGCGGTCTCACCGCCACCGGCCGCTTCACATTTGACCCTGGCTTCATGTCCACGGCATCTTGCGAGTCGAAGATCACCTACATCGATGGTGATAACGGAATCCTGCTTCACCGCGGCTACCCGATCGAACAACTGGCCGAGCAGTCCGATTATCTGGAAACCTGCTACCTGCTGCTAAATGGCGAATTGCCAACAGCCGAGCAAAAAGCCCAGTTCGTTGCCGTGGTCAAGAACCACACGATGGTTCACGAACAGCTCAAGACCTTTTTCAACGGCTTCCGCCGTGATGCCCACCCGATGGCCGTCATGTGCGGCGTAGTCGGCGCCC
	9	BoreoHeathMossGrass	moss	moss from mixed stand - location_2	2018	ISL0224	CAATTCTGACGGGTACAGTGGGTCCGGACGTGATCGACGTACGCGGTCTCACCGCCACCGGCCGCTTCACATTTGACCCTGGCTTCATGTCCACGGCATCTTGCGAGTCGAAGATCACCTACATCGATGGTGATAACGGAATCCTGCTTCACCGCGGCTACCCGATCGAACAACTGGCCGAGCAGTCCGATTATCTGGAAACCTGCTACCTGCTGCTAAATGGCGAATTGCCAACAGCCGAGCAAAAAGCCCAGTTCGTTGCCGTGGTCAAGAACCACACGATGGTTCACGAACAGCTCAAGACCTTTTTCAACGGCTTCCGCCGTGATGCCCACCCGATGGCCGTCATGTGCGGCGTAGTCGGCGCCC
	9	BoreoHeathMossGrass	moss	moss from mixed stand - location_2	2018	ISL0225	CAATTCTGACGGGTACAGTGGGTCCGGACGTGATCGACGTACGCGGTCTCACCGCCACCGGCCGCTTCACATTTGACCCTGGCTTCATGTCCACGGCATCTTGCGAGTCGAAGATCACCTACATCGATGGTGATAACGGAATCCTGCTTCACCGCGGCTACCCGATCGAACAACTGGCCGAGCAGTCCGATTATCTGGAAACCTGCTACCTGCTGCTAAATGGCGAATTGCCAACAGCCGAGCAAAAAGCCCAGTTCGTTGCCGTGGTCAAGAACCACACGATGGTTCACGAACAGCTCAAGACCTTTTTCAACGGCTTCCGCCGTGATGCCCACCCGATGGCCGTCATGTGCGGCGTAGTCGGCGCCC
	9	BoreoHeathMossGrass	moss	moss from mixed stand - location_2	2018	ISL0226	CAATTCTGACGGGTACAGTGGGTCCGGACGTGATCGACGTACGCGGTCTCACCGCCACCGGCCGCTTCACATTTGACCCTGGCTTCATGTCCACGGCATCTTGCGAGTCGAAGATCACCTACATCGATGGTGATAACGGAATCCTGCTTCACCGCGGCTACCCGATCGAACAACTGGCCGAGCAGTCCGATTATCTGGAAACCTGCTACCTGCTGCTAAATGGCGAATTGCCAACAGCCGAGCAAAAAGCCCAGTTCGTTGCCGTGGTCAAGAACCACACGATGGTTCACGAACAGCTCAAGACCTTTTTCAACGGCTTCCGCCGTGATGCCCACCCGATGGCCGTCATGTGCGGCGTAGTCGGCGCCC
	9	BoreoHeathMossGrass	moss	moss from mixed stand - location_3	2018	ISL0280	CAATTCTGACGGGTACAGTGGGTCCGGACGTGATCGACGTACGCGGTCTCACCGCCACCGGCCGCTTCACATTTGACCCTGGCTTCATGTCCACGGCATCTTGCGAGTCGAAGATCACCTACATCGATGGTGATAACGGAATCCTGCTTCACCGCGGCTACCCGATCGAACAACTGGCCGAGCAGTCCGATTATCTGGAAACCTGCTACCTGCTGCTAAATGGCGAATTGCCAACAGCCGAGCAAAAAGCCCAGTTCGTTGCCGTGGTCAAGAACCACACGATGGTTCACGAACAGCTCAAGACCTTTTTCAACGGCTTCCGCCGTGATGCCCACCCGATGGCCGTCATGTGCGGCGTAGTCGGCGCCC
	9	BoreoHeathMossGrass	moss	moss from mixed stand - location_3	2018	ISL0281	CAATTCTGACGGGTACAGTGGGTCCGGACGTGATCGACGTACGCGGTCTCACCGCCACCGGCCGCTTCACATTTGACCCTGGCTTCATGTCCACGGCATCTTGCGAGTCGAAGATCACCTACATCGATGGTGATAACGGAATCCTGCTTCACCGCGGCTACCCGATCGAACAACTGGCCGAGCAGTCCGATTATCTGGAAACCTGCTACCTGCTGCTAAATGGCGAATTGCCAACAGCCGAGCAAAAAGCCCAGTTCGTTGCCGTGGTCAAGAACCACACGATGGTTCACGAACAGCTCAAGACCTTTTTCAACGGCTTCCGCCGTGATGCCCACCCGATGGCCGTCATGTGCGGCGTAGTCGGCGCCC
	10	GrazedPasture	plant	farm grass_1	2018	ISL0003	CAATTCTGACGGGTACAGTGGGTCCGGACGTGATCGACGTACGCGGTCTCACCGCCACCGGCCGCTTCACATTTGACCCTGGCTTCATGTCCACGGCATCTTGCGAGTCGAAGATCACCTACATCGATGGTGATAACGGAATTCTGCTTCACCGCGGCTACCCGATCGAACAACTGGCCGAGCAGTCCGACTATCTGGAAACCTGCTACCTGCTGCTCAATGGCGAATTGCCAACCGCCGAGCAGAAAGCCCAGTTCGTTGCCGTGGTCAAAAACCACACGATGGTTCACGAACAGCTCAAGACCTTTTTCAACGGTTTCCGCCGTGATGCCCACCCGATGGCCGTCATGTGCGGCGTAGTCGGCGCCC
	10	GrazedPasture	plant	farm grass_1	2018	ISL0004	CAATTCTGACGGGTACAGTGGGTCCGGACGTGATCGACGTACGCGGTCTCACCGCCACCGGCCGCTTCACATTTGACCCTGGCTTCATGTCCACGGCATCTTGCGAGTCGAAGATCACCTACATCGATGGTGATAACGGAATTCTGCTTCACCGCGGCTACCCGATCGAACAACTGGCCGAGCAGTCCGACTATCTGGAAACCTGCTACCTGCTGCTCAATGGCGAATTGCCAACCGCCGAGCAGAAAGCCCAGTTCGTTGCCGTGGTCAAAAACCACACGATGGTTCACGAACAGCTCAAGACCTTTTTCAACGGTTTCCGCCGTGATGCCCACCCGATGGCCGTCATGTGCGGCGTAGTCGGCGCCC
	10	GrazedPasture	plant	farm grass_1	2018	ISL0005	CAATTCTGACGGGTACAGTGGGTCCGGACGTGATCGACGTACGCGGTCTCACCGCCACCGGCCGCTTCACATTTGACCCTGGCTTCATGTCCACGGCATCTTGCGAGTCGAAGATCACCTACATCGATGGTGATAACGGAATTCTGCTTCACCGCGGCTACCCGATCGAACAACTGGCCGAGCAGTCCGACTATCTGGAAACCTGCTACCTGCTGCTCAATGGCGAATTGCCAACCGCCGAGCAGAAAGCCCAGTTCGTTGCCGTGGTCAAAAACCACACGATGGTTCACGAACAGCTCAAGACCTTTTTCAACGGTTTCCGCCGTGATGCCCACCCGATGGCCGTCATGTGCGGCGTAGTCGGCGCCC
	10	GrazedPasture	plant	farm grass_1	2018	ISL0010	CAATTCTGACGGGTACAGTGGGTCCGGACGTGATCGACGTACGCGGTCTCACCGCCACCGGCCGCTTCACATTTGACCCTGGCTTCATGTCCACGGCATCTTGCGAGTCGAAGATCACCTACATCGATGGTGATAACGGAATTCTGCTTCACCGCGGCTACCCGATCGAACAACTGGCCGAGCAGTCCGACTATCTGGAAACCTGCTACCTGCTGCTCAATGGCGAATTGCCAACCGCCGAGCAGAAAGCCCAGTTCGTTGCCGTGGTCAAAAACCACACGATGGTTCACGAACAGCTCAAGACCTTTTTCAACGGTTTCCGCCGTGATGCCCACCCGATGGCCGTCATGTGCGGCGTAGTCGGCGCCC
	10	GrazedPasture	plant	farm grass_1	2018	ISL0011	CAATTCTGACGGGTACAGTGGGTCCGGACGTGATCGACGTACGCGGTCTCACCGCCACCGGCCGCTTCACATTTGACCCTGGCTTCATGTCCACGGCATCTTGCGAGTCGAAGATCACCTACATCGATGGTGATAACGGAATTCTGCTTCACCGCGGCTACCCGATCGAACAACTGGCCGAGCAGTCCGACTATCTGGAAACCTGCTACCTGCTGCTCAATGGCGAATTGCCAACCGCCGAGCAGAAAGCCCAGTTCGTTGCCGTGGTCAAAAACCACACGATGGTTCACGAACAGCTCAAGACCTTTTTCAACGGTTTCCGCCGTGATGCCCACCCGATGGCCGTCATGTGCGGCGTAGTCGGCGCCC
	10	GrazedPasture	plant	farm grass_1	2018	ISL0012	CAATTCTGACGGGTACAGTGGGTCCGGACGTGATCGACGTACGCGGTCTCACCGCCACCGGCCGCTTCACATTTGACCCTGGCTTCATGTCCACGGCATCTTGCGAGTCGAAGATCACCTACATCGATGGTGATAACGGAATTCTGCTTCACCGCGGCTACCCGATCGAACAACTGGCCGAGCAGTCCGACTATCTGGAAACCTGCTACCTGCTGCTCAATGGCGAATTGCCAACCGCCGAGCAGAAAGCCCAGTTCGTTGCCGTGGTCAAAAACCACACGATGGTTCACGAACAGCTCAAGACCTTTTTCAACGGTTTCCGCCGTGATGCCCACCCGATGGCCGTCATGTGCGGCGTAGTCGGCGCCC
	10	GrazedPasture	plant	farm grass_1	2018	ISL0013	CAATTCTGACGGGTACAGTGGGTCCGGACGTGATCGACGTACGCGGTCTCACCGCCACCGGCCGCTTCACATTTGACCCTGGCTTCATGTCCACGGCATCTTGCGAGTCGAAGATCACCTACATCGATGGTGATAACGGAATTCTGCTTCACCGCGGCTACCCGATCGAACAACTGGCCGAGCAGTCCGACTATCTGGAAACCTGCTACCTGCTGCTCAATGGCGAATTGCCAACCGCCGAGCAGAAAGCCCAGTTCGTTGCCGTGGTCAAAAACCACACGATGGTTCACGAACAGCTCAAGACCTTTTTCAACGGTTTCCGCCGTGATGCCCACCCGATGGCCGTCATGTGCGGCGTAGTCGGCGCCC
	10	GrazedPasture	plant	farm grass_1	2018	ISL0018	CAATTCTGACGGGTACAGTGGGTCCGGACGTGATCGACGTACGCGGTCTCACCGCCACCGGCCGCTTCACATTTGACCCTGGCTTCATGTCCACGGCATCTTGCGAGTCGAAGATCACCTACATCGATGGTGATAACGGAATTCTGCTTCACCGCGGCTACCCGATCGAACAACTGGCCGAGCAGTCCGACTATCTGGAAACCTGCTACCTGCTGCTCAATGGCGAATTGCCAACCGCCGAGCAGAAAGCCCAGTTCGTTGCCGTGGTCAAAAACCACACGATGGTTCACGAACAGCTCAAGACCTTTTTCAACGGTTTCCGCCGTGATGCCCACCCGATGGCCGTCATGTGCGGCGTAGTCGGCGCCC
	10	GrazedPasture	plant	farm grass_1	2018	ISL0020	CAATTCTGACGGGTACAGTGGGTCCGGACGTGATCGACGTACGCGGTCTCACCGCCACCGGCCGCTTCACATTTGACCCTGGCTTCATGTCCACGGCATCTTGCGAGTCGAAGATCACCTACATCGATGGTGATAACGGAATTCTGCTTCACCGCGGCTACCCGATCGAACAACTGGCCGAGCAGTCCGACTATCTGGAAACCTGCTACCTGCTGCTCAATGGCGAATTGCCAACCGCCGAGCAGAAAGCCCAGTTCGTTGCCGTGGTCAAAAACCACACGATGGTTCACGAACAGCTCAAGACCTTTTTCAACGGTTTCCGCCGTGATGCCCACCCGATGGCCGTCATGTGCGGCGTAGTCGGCGCCC
	10	GrazedPasture	plant	farm grass_1	2018	ISL0022	GGGTACAGTGGGTCCGGACGTGATCGACGTACGCGGTCTCACCGCCACCGGCCGCTTCACATTTGACCCTGGCTTCATGTCCACGGCATCTTGCGAGTCGAAGATCACCTACATCGATGGTGATAACGGAATTCTGCTTCACCGCGGCTACCCGATCGAACAACTGGCCGAGCAGTCCGACTATCTGGAAACCTGCTACCTGCTGCTCAATGGCGAATTGCCAACCGCCGAGCAGAAAGCCCAGTTCGTTGCCGTGGTCAAAAACCACACGATGGTTCACGAACAGCTCAAGACCTTTTTCAACGGTTTCCGCCGTGATGCCCACCCGATGGCCGTCATGTGCGGCGTAGTCGGCGCCC
	10	GrazedPasture	plant	farm grass_1	2018	ISL0024	CAATTCTGACGGGTACAGTGGGTCCGGACGTGATCGACGTACGCGGTCTCACCGCCACCGGCCGCTTCACATTTGACCCTGGCTTCATGTCCACGGCATCTTGCGAGTCGAAGATCACCTACATCGATGGTGATAACGGAATTCTGCTTCACCGCGGCTACCCGATCGAACAACTGGCCGAGCAGTCCGACTATCTGGAAACCTGCTACCTGCTGCTCAATGGCGAATTGCCAACCGCCGAGCAGAAAGCCCAGTTCGTTGCCGTGGTCAAAAACCACACGATGGTTCACGAACAGCTCAAGACCTTTTTCAACGGTTTCCGCCGTGATGCCCACCCGATGGCCGTCATGTGCGGCGTAGTCGGCGCCC
	10	GrazedPasture	plant	farm grass_1	2018	ISL0026	CAATTCTGACGGGTACAGTGGGTCCGGACGTGATCGACGTACGCGGTCTCACCGCCACCGGCCGCTTCACATTTGACCCTGGCTTCATGTCCACGGCATCTTGCGAGTCGAAGATCACCTACATCGATGGTGATAACGGAATTCTGCTTCACCGCGGCTACCCGATCGAACAACTGGCCGAGCAGTCCGACTATCTGGAAACCTGCTACCTGCTGCTCAATGGCGAATTGCCAACCGCCGAGCAGAAAGCCCAGTTCGTTGCCGTGGTCAAAAACCACACGATGGTTCACGAACAGCTCAAGACCTTTTTCAACGGTTTCCGCCGTGATGCCCACCCGATGGCCGTCATGTGCGGCGTAGTCGGCGCCC
	10	GrazedPasture	plant	farm grass_1	2018	ISL0029	CAATTCTGACGGGTACAGTGGGTCCGGACGTGATCGACGTACGCGGTCTCACCGCCACCGGCCGCTTCACATTTGACCCTGGCTTCATGTCCACGGCATCTTGCGAGTCGAAGATCACCTACATCGATGGTGATAACGGAATTCTGCTTCACCGCGGCTACCCGATCGAACAACTGGCCGAGCAGTCCGACTATCTGGAAACCTGCTACCTGCTGCTCAATGGCGAATTGCCAACCGCCGAGCAGAAAGCCCAGTTCGTTGCCGTGGTCAAAAACCACACGATGGTTCACGAACAGCTCAAGACCTTTTTCAACGGTTTCCGCCGTGATGCCCACCCGATGGCCGTCATGTGCGGCGTAGTCGGCGCCC
	10	GrazedPasture	plant	farm grass_2	2018	ISL0030	CAATTCTGACGGGTACAGTGGGTCCGGACGTGATCGACGTACGCGGTCTCACCGCCACCGGCCGCTTCACATTTGACCCTGGCTTCATGTCCACGGCATCTTGCGAGTCGAAGATCACCTACATCGATGGTGATAACGGAATTCTGCTTCACCGCGGCTACCCGATCGAACAACTGGCCGAGCAGTCCGACTATCTGGAAACCTGCTACCTGCTGCTCAATGGCGAATTGCCAACCGCCGAGCAGAAAGCCCAGTTCGTTGCCGTGGTCAAAAACCACACGATGGTTCACGAACAGCTCAAGACCTTTTTCAACGGTTTCCGCCGTGATGCCCACCCGATGGCCGTCATGTGCGGCGTAGTCGGCGCCC
	10	GrazedPasture	plant	farm grass_2	2018	ISL0031	CAATTCTGACGGGTACAGTGGGTCCGGACGTGATCGACGTACGCGGTCTCACCGCCACCGGCCGCTTCACATTTGACCCTGGCTTCATGTCCACGGCATCTTGCGAGTCGAAGATCACCTACATCGATGGTGATAACGGAATTCTGCTTCACCGCGGCTACCCGATCGAACAACTGGCCGAGCAGTCCGACTATCTGGAAACCTGCTACCTGCTGCTCAATGGCGAATTGCCAACCGCCGAGCAGAAAGCCCAGTTCGTTGCCGTGGTCAAAAACCACACGATGGTTCACGAACAGCTCAAGACCTTTTTCAACGGTTTCCGCCGTGATGCCCACCCGATGGCCGTCATGTGCGGCGTAGTCGGCGCCC
	10	GrazedPasture	plant	farm grass_2	2018	ISL0038	CAATTCTGACGGGTACAGTGGGTCCGGACGTGATCGACGTACGCGGTCTCACCGCCACCGGCCGCTTCACATTTGACCCTGGCTTCATGTCCACGGCATCTTGCGAGTCGAAGATCACCTACATCGATGGTGATAACGGAATTCTGCTTCACCGCGGCTACCCGATCGAACAACTGGCCGAGCAGTCCGACTATCTGGAAACCTGCTACCTGCTGCTCAATGGCGAATTGCCAACCGCCGAGCAGAAAGCCCAGTTCGTTGCCGTGGTCAAAAACCACACGATGGTTCACGAACAGCTCAAGACCTTTTTCAACGGTTTCCGCCGTGATGCCCACCCGATGGCCGTCATGTGCGGCGTAGTCGGCGCCC
	10	GrazedPasture	plant	farm grass_2	2018	ISL0039	CAATTCTGACGGGTACAGTGGGTCCGGACGTGATCGACGTACGCGGTCTCACCGCCACCGGCCGCTTCACATTTGACCCTGGCTTCATGTCCACGGCATCTTGCGAGTCGAAGATCACCTACATCGATGGTGATAACGGAATTCTGCTTCACCGCGGCTACCCGATCGAACAACTGGCCGAGCAGTCCGACTATCTGGAAACCTGCTACCTGCTGCTCAATGGCGAATTGCCAACCGCCGAGCAGAAAGCCCAGTTCGTTGCCGTGGTCAAAAACCACACGATGGTTCACGAACAGCTCAAGACCTTTTTCAACGGTTTCCGCCGTGATGCCCACCCGATGGCCGTCATGTGCGGCGTAGTCGGCGCCC
	10	GrazedPasture	plant	pasture grass-2	2018	ISL0452	CAATTCTGACGGGTACAGTGGGTCCGGACGTGATCGACGTACGCGGTCTCACCGCCACCGGCCGCTTCACATTTGACCCTGGCTTCATGTCCACGGCATCTTGCGAGTCGAAGATCACCTACATCGATGGTGATAACGGAATTCTGCTTCACCGCGGCTACCCGATCGAACAACTGGCCGAGCAGTCCGACTATCTGGAAACCTGCTACCTGCTGCTCAATGGCGAATTGCCAACCGCCGAGCAGAAAGCCCAGTTCGTTGCCGTGGTCAAAAACCACACGATGGTTCACGAACAGCTCAAGACCTTTTTCAACGGTTTCCGCCGTGATGCCCACCCGATGGCCGTCATGTGCGGCGTAGTCGGCGCCC
	11	OroborealAlpineGlacier	plant	sparse mixed grass-1	2018	ISL0060	CAATTCTGACGGGTACAGTGGGTCCGGACGTGATCGACGTACGCGGTCTCACCGCCACCGGCCGCTTCACATTTGACCCTGGCTTCATGTCCACGGCATCTTGCGAGTCGAAGATCACCTACATCGATGGTGATAACGGAATCCTGCTTCACCGCGGCTACCCGATCGAACAACTGGCCGAGCAGTCCGATTATCTGGAAACCTGCTACCTGCTGCTCAATGGCGAATTGCCAACCGCCGAGCAGAAAGCCCAGTTCGTTGCCGTGGTCAAGAACCACACGATGGTTCACGAACAGCTCAAGACCTTTTTCAACGGCTTCCGCCGTGATGCCCACCCGATGGCCGTCATGTGCGGCGTAGTCGGCGCGC
	11	OroborealAlpineGlacier	plant	sparse mixed grass-1	2018	ISL0063	CAATTCTGACGGGTACAGTGGGTCCGGACGTGATCGACGTACGCGGTCTCACCGCCACCGGCCGCTTCACATTTGACCCTGGCTTCATGTCCACGGCATCTTGCGAGTCGAAGATCACCTACATCGATGGTGATAACGGAATCCTGCTTCACCGCGGCTACCCGATCGAACAACTGGCCGAGCAGTCCGATTATCTGGAAACCTGCTACCTGCTGCTCAATGGCGAATTGCCAACCGCCGAGCAGAAAGCCCAGTTCGTTGCCGTGGTCAAGAACCACACGATGGTTCACGAACAGCTCAAGACCTTTTTCAACGGCTTCCGCCGTGATGCCCACCCGATGGCCGTCATGTGCGGCGTAGTCGGCGCGC
	11	OroborealAlpineGlacier	plant	sparse mixed grass-1	2018	ISL0064	CAATTCTGACGGGTACAGTGGGTCCGGACGTGATCGACGTACGCGGTCTCACCGCCACCGGCCGCTTCACATTTGACCCTGGCTTCATGTCCACGGCATCTTGCGAGTCGAAGATCACCTACATCGATGGTGATAACGGAATCCTGCTTCACCGCGGCTACCCGATCGAACAACTGGCCGAGCAGTCCGATTATCTGGAAACCTGCTACCTGCTGCTCAATGGCGAATTGCCAACCGCCGAGCAGAAAGCCCAGTTCGTTGCCGTGGTCAAGAACCACACGATGGTTCACGAACAGCTCAAGACCTTTTTCAACGGCTTCCGCCGTGATGCCCACCCGATGGCCGTCATGTGCGGCGTAGTCGGCGCGC
	11	OroborealAlpineGlacier	plant	sparse mixed grass-1	2018	ISL0065	CAATTCTGACGGGTACAGTGGGTCCGGACGTGATCGACGTACGCGGTCTCACCGCCACCGGCCGCTTCACATTTGACCCTGGCTTCATGTCCACGGCATCTTGCGAGTCGAAGATCACCTACATCGATGGTGATAACGGAATCCTGCTTCACCGCGGCTACCCGATCGAACAACTGGCCGAGCAGTCCGATTATCTGGAAACCTGCTACCTGCTGCTCAATGGCGAATTGCCAACCGCCGAGCAGAAAGCCCAGTTCGTTGCCGTGGTCAAGAACCACACGATGGTTCACGAACAGCTCAAGACCTTTTTCAACGGCTTCCGCCGTGATGCCCACCCGATGGCCGTCATGTGCGGCGTAGTCGGCGCGC
	11	OroborealAlpineGlacier	plant	sparse mixed grass-1	2018	ISL0066	CAATTCTGACGGGTACAGTGGGTCCGGACGTGATCGACGTACGCGGTCTCACCGCCACCGGCCGCTTCACATTTGACCCTGGCTTCATGTCCACGGCATCTTGCGAGTCGAAGATCACCTACATCGATGGTGATAACGGAATCCTGCTTCACCGCGGCTACCCGATCGAACAACTGGCCGAGCAGTCCGATTATCTGGAAACCTGCTACCTGCTGCTCAATGGCGAATTGCCAACCGCCGAGCAGAAAGCCCAGTTCGTTGCCGTGGTCAAGAACCACACGATGGTTCACGAACAGCTCAAGACCTTTTTCAACGGCTTCCGCCGTGATGCCCACCCGATGGCCGTCATGTGCGGCGTAGTCGGCGCGC
	11	OroborealAlpineGlacier	plant	sparse mixed grass-1	2018	ISL0067	CAATTCTGACGGGTACAGTGGGTCCGGACGTGATCGACGTACGCGGTCTCACCGCCACCGGCCGCTTCACATTTGACCCTGGCTTCATGTCCACGGCATCTTGCGAGTCGAAGATCACCTACATCGATGGTGATAACGGAATCCTGCTTCACCGCGGCTACCCGATCGAACAACTGGCCGAGCAGTCCGATTATCTGGAAACCTGCTACCTGCTGCTCAATGGCGAATTGCCAACCGCCGAGCAGAAAGCCCAGTTCGTTGCCGTGGTCAAGAACCACACGATGGTTCACGAACAGCTCAAGACCTTTTTCAACGGCTTCCGCCGTGATGCCCACCCGATGGCCGTCATGTGCGGCGTAGTCGGCGCGC
	11	OroborealAlpineGlacier	plant	sparse mixed grass-1	2018	ISL0069	CAATTCTGACGGGTACAGTGGGTCCGGACGTGATCGACGTACGCGGTCTCACCGCCACCGGCCGCTTCACATTTGACCCTGGCTTCATGTCCACGGCATCTTGCGAGTCGAAGATCACCTACATCGATGGTGATAACGGAATCCTGCTTCACCGCGGCTACCCGATCGAACAACTGGCCGAGCAGTCCGATTATCTGGAAACCTGCTACCTGCTGCTCAATGGCGAATTGCCAACCGCCGAGCAGAAAGCCCAGTTCGTTGCCGTGGTCAAGAACCACACGATGGTTCACGAACAGCTCAAGACCTTTTTCAACGGCTTCCGCCGTGATGCCCACCCGATGGCCGTCATGTGCGGCGTAGTCGGCGCGC
	11	OroborealAlpineGlacier	plant	sparse mixed grass-1	2018	ISL0070	CAATTCTGACGGGTACAGTGGGTCCGGACGTGATCGACGTACGCGGTCTCACCGCCACCGGCCGCTTCACATTTGACCCTGGCTTCATGTCCACGGCATCTTGCGAGTCGAAGATCACCTACATCGATGGTGATAACGGAATCCTGCTTCACCGCGGCTACCCGATCGAACAACTGGCCGAGCAGTCCGATTATCTGGAAACCTGCTACCTGCTGCTCAATGGCGAATTGCCAACCGCCGAGCAGAAAGCCCAGTTCGTTGCCGTGGTCAAGAACCACACGATGGTTCACGAACAGCTCAAGACCTTTTTCAACGGCTTCCGCCGTGATGCCCACCCGATGGCCGTCATGTGCGGCGTAGTCGGCGCGC
	11	OroborealAlpineGlacier	plant	sparse mixed grass-1	2018	ISL0073	CAATTCTGACGGGTACAGTGGGTCCGGACGTGATCGACGTACGCGGTCTCACCGCCACCGGCCGCTTCACATTTGACCCTGGCTTCATGTCCACGGCATCTTGCGAGTCGAAGATCACCTACATCGATGGTGATAACGGAATCCTGCTTCACCGCGGCTACCCGATCGAACAACTGGCCGAGCAGTCCGATTATCTGGAAACCTGCTACCTGCTGCTCAATGGCGAATTGCCAACCGCCGAGCAGAAAGCCCAGTTCGTTGCCGTGGTCAAGAACCACACGATGGTTCACGAACAGCTCAAGACCTTTTTCAACGGCTTCCGCCGTGATGCCCACCCGATGGCCGTCATGTGCGGCGTAGTCGGCGCGC
	11	OroborealAlpineGlacier	plant	sparse mixed grass-1	2018	ISL0074	CAATTCTGACGGGTACAGTGGGTCCGGACGTGATCGACGTACGCGGTCTCACCGCCACCGGCCGCTTCACATTTGACCCTGGCTTCATGTCCACGGCATCTTGCGAGTCGAAGATCACCTACATCGATGGTGATAACGGAATCCTGCTTCACCGCGGCTACCCGATCGAACAACTGGCCGAGCAGTCCGATTATCTGGAAACCTGCTACCTGCTGCTCAATGGCGAATTGCCAACCGCCGAGCAGAAAGCCCAGTTCGTTGCCGTGGTCAAGAACCACACGATGGTTCACGAACAGCTCAAGACCTTTTTCAACGGCTTCCGCCGTGATGCCCACCCGATGGCCGTCATGTGCGGCGTAGTCGGCGCGC
	11	OroborealAlpineGlacier	plant	sparse mixed grass-1	2018	ISL0075	CAATTCTGACGGGTACAGTGGGTCCGGACGTGATCGACGTACGCGGTCTCACCGCCACCGGCCGCTTCACATTTGACCCTGGCTTCATGTCCACGGCATCTTGCGAGTCGAAGATCACCTACATCGATGGTGATAACGGAATCCTGCTTCACCGCGGCTACCCGATCGAACAACTGGCCGAGCAGTCCGATTATCTGGAAACCTGCTACCTGCTGCTCAATGGCGAATTGCCAACCGCCGAGCAGAAAGCCCAGTTCGTTGCCGTGGTCAAGAACCACACGATGGTTCACGAACAGCTCAAGACCTTTTTCAACGGCTTCCGCCGTGATGCCCACCCGATGGCCGTCATGTGCGGCGTAGTCGGCGCGC
	11	OroborealAlpineGlacier	plant	sparse mixed grass-1	2018	ISL0076	CAATTCTGACGGGTACAGTGGGTCCGGACGTGATCGACGTACGCGGTCTCACCGCCACCGGCCGCTTCACATTTGACCCTGGCTTCATGTCCACGGCATCTTGCGAGTCGAAGATCACCTACATCGATGGTGATAACGGAATCCTGCTTCACCGCGGCTACCCGATCGAACAACTGGCCGAGCAGTCCGATTATCTGGAAACCTGCTACCTGCTGCTCAATGGCGAATTGCCAACCGCCGAGCAGAAAGCCCAGTTCGTTGCCGTGGTCAAGAACCACACGATGGTTCACGAACAGCTCAAGACCTTTTTCAACGGCTTCCGCCGTGATGCCCACCCGATGGCCGTCATGTGCGGCGTAGTCGGCGCGC
	11	OroborealAlpineGlacier	plant	sparse mixed grass-1	2018	ISL0077	CAATTCTGACGGGTACAGTGGGTCCGGACGTGATCGACGTACGCGGTCTCACCGCCACCGGCCGCTTCACATTTGACCCTGGCTTCATGTCCACGGCATCTTGCGAGTCGAAGATCACCTACATCGATGGTGATAACGGAATCCTGCTTCACCGCGGCTACCCGATCGAACAACTGGCCGAGCAGTCCGATTATCTGGAAACCTGCTACCTGCTGCTCAATGGCGAATTGCCAACCGCCGAGCAGAAAGCCCAGTTCGTTGCCGTGGTCAAGAACCACACGATGGTTCACGAACAGCTCAAGACCTTTTTCAACGGCTTCCGCCGTGATGCCCACCCGATGGCCGTCATGTGCGGCGTAGTCGGCGCGC
	11	OroborealAlpineGlacier	plant	sparse mixed grass-1	2018	ISL0078	CAATTCTGACGGGTACAGTGGGTCCGGACGTGATCGACGTACGCGGTCTCACCGCCACCGGCCGCTTCACATTTGACCCTGGCTTCATGTCCACGGCATCTTGCGAGTCGAAGATCACCTACATCGATGGTGATAACGGAATCCTGCTTCACCGCGGCTACCCGATCGAACAACTGGCCGAGCAGTCCGATTATCTGGAAACCTGCTACCTGCTGCTCAATGGCGAATTGCCAACCGCCGAGCAGAAAGCCCAGTTCGTTGCCGTGGTCAAGAACCACACGATGGTTCACGAACAGCTCAAGACCTTTTTCAACGGCTTCCGCCGTGATGCCCACCCGATGGCCGTCATGTGCGGCGTAGTCGGCGCGC
	11	OroborealAlpineGlacier	plant	sparse mixed grass-1	2018	ISL0082	CAATTCTGACGGGTACAGTGGGTCCGGACGTGATCGACGTACGCGGTCTCACCGCCACCGGCCGCTTCACATTTGACCCTGGCTTCATGTCCACGGCATCTTGCGAGTCGAAGATCACCTACATCGATGGTGATAACGGAATCCTGCTTCACCGCGGCTACCCGATCGAACAACTGGCCGAGCAGTCCGATTATCTGGAAACCTGCTACCTGCTGCTCAATGGCGAATTGCCAACCGCCGAGCAGAAAGCCCAGTTCGTTGCCGTGGTCAAGAACCACACGATGGTTCACGAACAGCTCAAGACCTTTTTCAACGGCTTCCGCCGTGATGCCCACCCGATGGCCGTCATGTGCGGCGTAGTCGGCGCGC
	11	OroborealAlpineGlacier	plant	sparse mixed grass-1	2018	ISL0083	CAATTCTGACGGGTACAGTGGGTCCGGACGTGATCGACGTACGCGGTCTCACCGCCACCGGCCGCTTCACATTTGACCCTGGCTTCATGTCCACGGCATCTTGCGAGTCGAAGATCACCTACATCGATGGTGATAACGGAATCCTGCTTCACCGCGGCTACCCGATCGAACAACTGGCCGAGCAGTCCGATTATCTGGAAACCTGCTACCTGCTGCTCAATGGCGAATTGCCAACCGCCGAGCAGAAAGCCCAGTTCGTTGCCGTGGTCAAGAACCACACGATGGTTCACGAACAGCTCAAGACCTTTTTCAACGGCTTCCGCCGTGATGCCCACCCGATGGCCGTCATGTGCGGCGTAGTCGGCGCGC
	11	OroborealAlpineGlacier	plant	sparse mixed grass-1	2018	ISL0084	CAATTCTGACGGGTACAGTGGGTCCGGACGTGATCGACGTACGCGGTCTCACCGCCACCGGCCGCTTCACATTTGACCCTGGCTTCATGTCCACGGCATCTTGCGAGTCGAAGATCACCTACATCGATGGTGATAACGGAATCCTGCTTCACCGCGGCTACCCGATCGAACAACTGGCCGAGCAGTCCGATTATCTGGAAACCTGCTACCTGCTGCTCAATGGCGAATTGCCAACCGCCGAGCAGAAAGCCCAGTTCGTTGCCGTGGTCAAGAACCACACGATGGTTCACGAACAGCTCAAGACCTTTTTCAACGGCTTCCGCCGTGATGCCCACCCGATGGCCGTCATGTGCGGCGTAGTCGGCGCGC
	11	OroborealAlpineGlacier	plant	sparse mixed grass-1	2018	ISL0085	CAATTCTGACGGGTACAGTGGGTCCGGACGTGATCGACGTACGCGGTCTCACCGCCACCGGCCGCTTCACATTTGACCCTGGCTTCATGTCCACGGCATCTTGCGAGTCGAAGATCACCTACATCGATGGTGATAACGGAATCCTGCTTCACCGCGGCTACCCGATCGAACAACTGGCCGAGCAGTCCGATTATCTGGAAACCTGCTACCTGCTGCTCAATGGCGAATTGCCAACCGCCGAGCAGAAAGCCCAGTTCGTTGCCGTGGTCAAGAACCACACGATGGTTCACGAACAGCTCAAGACCTTTTTCAACGGCTTCCGCCGTGATGCCCACCCGATGGCCGTCATGTGCGGCGTAGTCGGCGCGC
	11	OroborealAlpineGlacier	plant	sparse mixed grass-1	2018	ISL0086	CAATTCTGACGGGTACAGTGGGTCCGGACGTGATCGACGTACGCGGTCTCACCGCCACCGGCCGCTTCACATTTGACCCTGGCTTCATGTCCACGGCATCTTGCGAGTCGAAGATCACCTACATCGATGGTGATAACGGAATCCTGCTTCACCGCGGCTACCCGATCGAACAACTGGCCGAGCAGTCCGATTATCTGGAAACCTGCTACCTGCTGCTCAATGGCGAATTGCCAACCGCCGAGCAGAAAGCCCAGTTCGTTGCCGTGGTCAAGAACCACACGATGGTTCACGAACAGCTCAAGACCTTTTTCAACGGCTTCCGCCGTGATGCCCACCCGATGGCCGTCATGTGCGGCGTAGTCGGCGCGC
	11	OroborealAlpineGlacier	plant	sparse mixed grass-1	2018	ISL0088	CAATTCTGACGGGTACAGTGGGTCCGGACGTGATCGACGTACGCGGTCTCACCGCCACCGGCCGCTTCACATTTGACCCTGGCTTCATGTCCACGGCATCTTGCGAGTCGAAGATCACCTACATCGATGGTGATAACGGAATCCTGCTTCACCGCGGCTACCCGATCGAACAACTGGCCGAGCAGTCCGATTATCTGGAAACCTGCTACCTGCTGCTCAATGGCGAATTGCCAACCGCCGAGCAGAAAGCCCAGTTCGTTGCCGTGGTCAAGAACCACACGATGGTTCACGAACAGCTCAAGACCTTTTTCAACGGCTTCCGCCGTGATGCCCACCCGATGGCCGTCATGTGCGGCGTAGTCGGCGCGC
	12	OroborealAlpineGlacier	plant	sparse mixed grass-2	2018	ISL0300	CAATTCTGACGGGTACAGTGGGTCCGGACGTGATCGACGTACGCGGTCTCACCGCCACCGGCCGCTTCACATTTGACCCTGGCTTCATGTCCACGGCATCTTGCGAGTCGAAGATCACCTACATCGATGGTGATAACGGAATCCTGCTTCACCGCGGCTACCCGATCGAACAACTGGCCGAGCAGTCCGATTATCTGGAAACCTGCTACCTGCTGCTCAATGGCGAATTGCCAACCGCCGAGCAGAAAGTCCAGTTCGTTGCCGTGGTCAAGAACCACACGATGGTTCACGAACAGCTCAAGACCTTTTTCAACGGCTTCCGCCGTGATGCCCACCCGATGGCCGTCATGTGCGGCGTAGTCGGCGCGC
	12	OroborealAlpineGlacier	plant	sparse mixed grass-2	2018	ISL0306	CAATTCTGACGGGTACAGTGGGTCCGGACGTGATCGACGTACGCGGTCTCACCGCCACCGGCCGCTTCACATTTGACCCTGGCTTCATGTCCACGGCATCTTGCGAGTCGAAGATCACCTACATCGATGGTGATAACGGAATCCTGCTTCACCGCGGCTACCCGATCGAACAACTGGCCGAGCAGTCCGATTATCTGGAAACCTGCTACCTGCTGCTCAATGGCGAATTGCCAACCGCCGAGCAGAAAGTCCAGTTCGTTGCCGTGGTCAAGAACCACACGATGGTTCACGAACAGCTCAAGACCTTTTTCAACGGCTTCCGCCGTGATGCCCACCCGATGGCCGTCATGTGCGGCGTAGTCGGCGCGC
	12	OroborealAlpineGlacier	plant	sparse mixed grass-2	2018	ISL0308	CAATTCTGACGGGTACAGTGGGTCCGGACGTGATCGACGTACGCGGTCTCACCGCCACCGGCCGCTTCACATTTGACCCTGGCTTCATGTCCACGGCATCTTGCGAGTCGAAGATCACCTACATCGATGGTGATAACGGAATCCTGCTTCACCGCGGCTACCCGATCGAACAACTGGCCGAGCAGTCCGATTATCTGGAAACCTGCTACCTGCTGCTCAATGGCGAATTGCCAACCGCCGAGCAGAAAGTCCAGTTCGTTGCCGTGGTCAAGAACCACACGATGGTTCACGAACAGCTCAAGACCTTTTTCAACGGCTTCCGCCGTGATGCCCACCCGATGGCCGTCATGTGCGGCGTAGTCGGCGCGC
	12	OroborealAlpineGlacier	plant	sparse mixed grass-2	2018	ISL0314	CAATTCTGACGGGTACAGTGGGTCCGGACGTGATCGACGTACGCGGTCTCACCGCCACCGGCCGCTTCACATTTGACCCTGGCTTCATGTCCACGGCATCTTGCGAGTCGAAGATCACCTACATCGATGGTGATAACGGAATCCTGCTTCACCGCGGCTACCCGATCGAACAACTGGCCGAGCAGTCCGATTATCTGGAAACCTGCTACCTGCTGCTCAATGGCGAATTGCCAACCGCCGAGCAGAAAGTCCAGTTCGTTGCCGTGGTCAAGAACCACACGATGGTTCACGAACAGCTCAAGACCTTTTTCAACGGCTTCCGCCGTGATGCCCACCCGATGGCCGTCATGTGCGGCGTAGTCGGCGCGC
	12	OroborealAlpineGlacier	plant	sparse mixed grass-2	2018	ISL0320	CAATTCTGACGGGTACAGTGGGTCCGGACGTGATCGACGTACGCGGTCTCACCGCCACCGGCCGCTTCACATTTGACCCTGGCTTCATGTCCACGGCATCTTGCGAGTCGAAGATCACCTACATCGATGGTGATAACGGAATCCTGCTTCACCGCGGCTACCCGATCGAACAACTGGCCGAGCAGTCCGATTATCTGGAAACCTGCTACCTGCTGCTCAATGGCGAATTGCCAACCGCCGAGCAGAAAGTCCAGTTCGTTGCCGTGGTCAAGAACCACACGATGGTTCACGAACAGCTCAAGACCTTTTTCAACGGCTTCCGCCGTGATGCCCACCCGATGGCCGTCATGTGCGGCGTAGTCGGCGCGC
	12	OroborealAlpineGlacier	plant	sparse mixed grass-2	2018	ISL0321	CAATTCTGACGGGTACAGTGGGTCCGGACGTGATCGACGTACGCGGTCTCACCGCCACCGGCCGCTTCACATTTGACCCTGGCTTCATGTCCACGGCATCTTGCGAGTCGAAGATCACCTACATCGATGGTGATAACGGAATCCTGCTTCACCGCGGCTACCCGATCGAACAACTGGCCGAGCAGTCCGATTATCTGGAAACCTGCTACCTGCTGCTCAATGGCGAATTGCCAACCGCCGAGCAGAAAGTCCAGTTCGTTGCCGTGGTCAAGAACCACACGATGGTTCACGAACAGCTCAAGACCTTTTTCAACGGCTTCCGCCGTGATGCCCACCCGATGGCCGTCATGTGCGGCGTAGTCGGCGCGC
	12	OroborealAlpineGlacier	plant	sparse mixed grass-2	2018	ISL0325	CAATTCTGACGGGTACAGTGGGTCCGGACGTGATCGACGTACGCGGTCTCACCGCCACCGGCCGCTTCACATTTGACCCTGGCTTCATGTCCACGGCATCTTGCGAGTCGAAGATCACCTACATCGATGGTGATAACGGAATCCTGCTTCACCGCGGCTACCCGATCGAACAACTGGCCGAGCAGTCCGATTATCTGGAAACCTGCTACCTGCTGCTCAATGGCGAATTGCCAACCGCCGAGCAGAAAGTCCAGTTCGTTGCCGTGGTCAAGAACCACACGATGGTTCACGAACAGCTCAAGACCTTTTTCAACGGCTTCCGCCGTGATGCCCACCCGATGGCCGTCATGTGCGGCGTAGTCGGCGCGC
	13	OroborealAlpineGlacier	plant	sparse mixed grass-2	2018	ISL0302	CAATTCTGACGGGTACAGTGGGTCCGGACGTGATCGACGTACGCGGTCTCACCGCCACCGGCCGCTTCACATTTGACCCTGGCTTCATGTCCACGGCATCTTGCGAGTCGAAGATCACCTACATCGACGGTGATAACGGAATCCTGCTTCACCGCGGCTACCCGATCGAGCAACTGGCCGAGCAGTCCGATTATCTGGAAACCTGCTACCTGCTGCTCAATGGCGAATTGCCAACTGCCGAGCAGAAAGCCCAGTTCGTTGCCGTGGTCAAGAACCACACGATGGTTCACGAACAGCTCAAGACCTTTTTCAACGGCTTCCGCCGTGATGCCCACCCGATGGCCGTCATGTGCGGCGTAGTCGGCGCCC
	13	OroborealAlpineGlacier	plant	sparse mixed grass-2	2018	ISL0304	CAATTCTGACGGGTACAGTGGGTCCGGACGTGATCGACGTACGCGGTCTCACCGCCACCGGCCGCTTCACATTTGACCCTGGCTTCATGTCCACGGCATCTTGCGAGTCGAAGATCACCTACATCGACGGTGATAACGGAATCCTGCTTCACCGCGGCTACCCGATCGAGCAACTGGCCGAGCAGTCCGATTATCTGGAAACCTGCTACCTGCTGCTCAATGGCGAATTGCCAACTGCCGAGCAGAAAGCCCAGTTCGTTGCCGTGGTCAAGAACCACACGATGGTTCACGAACAGCTCAAGACCTTTTTCAACGGCTTCCGCCGTGATGCCCACCCGATGGCCGTCATGTGCGGCGTAGTCGGCGCCC
	13	OroborealAlpineGlacier	plant	sparse mixed grass-2	2018	ISL0305	CAATTCTGACGGGTACAGTGGGTCCGGACGTGATCGACGTACGCGGTCTCACCGCCACCGGCCGCTTCACATTTGACCCTGGCTTCATGTCCACGGCATCTTGCGAGTCGAAGATCACCTACATCGACGGTGATAACGGAATCCTGCTTCACCGCGGCTACCCGATCGAGCAACTGGCCGAGCAGTCCGATTATCTGGAAACCTGCTACCTGCTGCTCAATGGCGAATTGCCAACTGCCGAGCAGAAAGCCCAGTTCGTTGCCGTGGTCAAGAACCACACGATGGTTCACGAACAGCTCAAGACCTTTTTCAACGGCTTCCGCCGTGATGCCCACCCGATGGCCGTCATGTGCGGCGTAGTCGGCGCCC
	13	OroborealAlpineGlacier	plant	sparse mixed grass-2	2018	ISL0309	CAATTCTGACGGGTACAGTGGGTCCGGACGTGATCGACGTACGCGGTCTCACCGCCACCGGCCGCTTCACATTTGACCCTGGCTTCATGTCCACGGCATCTTGCGAGTCGAAGATCACCTACATCGACGGTGATAACGGAATCCTGCTTCACCGCGGCTACCCGATCGAGCAACTGGCCGAGCAGTCCGATTATCTGGAAACCTGCTACCTGCTGCTCAATGGCGAATTGCCAACTGCCGAGCAGAAAGCCCAGTTCGTTGCCGTGGTCAAGAACCACACGATGGTTCACGAACAGCTCAAGACCTTTTTCAACGGCTTCCGCCGTGATGCCCACCCGATGGCCGTCATGTGCGGCGTAGTCGGCGCCC
	13	OroborealAlpineGlacier	plant	sparse mixed grass-2	2018	ISL0310	CAATTCTGACGGGTACAGTGGGTCCGGACGTGATCGACGTACGCGGTCTCACCGCCACCGGCCGCTTCACATTTGACCCTGGCTTCATGTCCACGGCATCTTGCGAGTCGAAGATCACCTACATCGACGGTGATAACGGAATCCTGCTTCACCGCGGCTACCCGATCGAGCAACTGGCCGAGCAGTCCGATTATCTGGAAACCTGCTACCTGCTGCTCAATGGCGAATTGCCAACTGCCGAGCAGAAAGCCCAGTTCGTTGCCGTGGTCAAGAACCACACGATGGTTCACGAACAGCTCAAGACCTTTTTCAACGGCTTCCGCCGTGATGCCCACCCGATGGCCGTCATGTGCGGCGTAGTCGGCGCCC
	13	OroborealAlpineGlacier	plant	sparse mixed grass-2	2018	ISL0311	CAATTCTGACGGGTACAGTGGGTCCGGACGTGATCGACGTACGCGGTCTCACCGCCACCGGCCGCTTCACATTTGACCCTGGCTTCATGTCCACGGCATCTTGCGAGTCGAAGATCACCTACATCGACGGTGATAACGGAATCCTGCTTCACCGCGGCTACCCGATCGAGCAACTGGCCGAGCAGTCCGATTATCTGGAAACCTGCTACCTGCTGCTCAATGGCGAATTGCCAACTGCCGAGCAGAAAGCCCAGTTCGTTGCCGTGGTCAAGAACCACACGATGGTTCACGAACAGCTCAAGACCTTTTTCAACGGCTTCCGCCGTGATGCCCACCCGATGGCCGTCATGTGCGGCGTAGTCGGCGCCC
	13	OroborealAlpineGlacier	plant	sparse mixed grass-2	2018	ISL0312	CAATTCTGACGGGTACAGTGGGTCCGGACGTGATCGACGTACGCGGTCTCACCGCCACCGGCCGCTTCACATTTGACCCTGGCTTCATGTCCACGGCATCTTGCGAGTCGAAGATCACCTACATCGACGGTGATAACGGAATCCTGCTTCACCGCGGCTACCCGATCGAGCAACTGGCCGAGCAGTCCGATTATCTGGAAACCTGCTACCTGCTGCTCAATGGCGAATTGCCAACTGCCGAGCAGAAAGCCCAGTTCGTTGCCGTGGTCAAGAACCACACGATGGTTCACGAACAGCTCAAGACCTTTTTCAACGGCTTCCGCCGTGATGCCCACCCGATGGCCGTCATGTGCGGCGTAGTCGGCGCCC
	13	OroborealAlpineGlacier	plant	sparse mixed grass-2	2018	ISL0313	CAATTCTGACGGGTACAGTGGGTCCGGACGTGATCGACGTACGCGGTCTCACCGCCACCGGCCGCTTCACATTTGACCCTGGCTTCATGTCCACGGCATCTTGCGAGTCGAAGATCACCTACATCGACGGTGATAACGGAATCCTGCTTCACCGCGGCTACCCGATCGAGCAACTGGCCGAGCAGTCCGATTATCTGGAAACCTGCTACCTGCTGCTCAATGGCGAATTGCCAACTGCCGAGCAGAAAGCCCAGTTCGTTGCCGTGGTCAAGAACCACACGATGGTTCACGAACAGCTCAAGACCTTTTTCAACGGCTTCCGCCGTGATGCCCACCCGATGGCCGTCATGTGCGGCGTAGTCGGCGCCC
	13	OroborealAlpineGlacier	plant	sparse mixed grass-2	2018	ISL0316	CAATTCTGACGGGTACAGTGGGTCCGGACGTGATCGACGTACGCGGTCTCACCGCCACCGGCCGCTTCACATTTGACCCTGGCTTCATGTCCACGGCATCTTGCGAGTCGAAGATCACCTACATCGACGGTGATAACGGAATCCTGCTTCACCGCGGCTACCCGATCGAGCAACTGGCCGAGCAGTCCGATTATCTGGAAACCTGCTACCTGCTGCTCAATGGCGAATTGCCAACTGCCGAGCAGAAAGCCCAGTTCGTTGCCGTGGTCAAGAACCACACGATGGTTCACGAACAGCTCAAGACCTTTTTCAACGGCTTCCGCCGTGATGCCCACCCGATGGCCGTCATGTGCGGCGTAGTCGGCGCCC
	13	OroborealAlpineGlacier	plant	sparse mixed grass-2	2018	ISL0319	CAATTCTGACGGGTACAGTGGGTCCGGACGTGATCGACGTACGCGGTCTCACCGCCACCGGCCGCTTCACATTTGACCCTGGCTTCATGTCCACGGCATCTTGCGAGTCGAAGATCACCTACATCGACGGTGATAACGGAATCCTGCTTCACCGCGGCTACCCGATCGAGCAACTGGCCGAGCAGTCCGATTATCTGGAAACCTGCTACCTGCTGCTCAATGGCGAATTGCCAACTGCCGAGCAGAAAGCCCAGTTCGTTGCCGTGGTCAAGAACCACACGATGGTTCACGAACAGCTCAAGACCTTTTTCAACGGCTTCCGCCGTGATGCCCACCCGATGGCCGTCATGTGCGGCGTAGTCGGCGCCC
	13	OroborealAlpineGlacier	plant	sparse mixed grass-2	2018	ISL0322	CAATTCTGACGGGTACAGTGGGTCCGGACGTGATCGACGTACGCGGTCTCACCGCCACCGGCCGCTTCACATTTGACCCTGGCTTCATGTCCACGGCATCTTGCGAGTCGAAGATCACCTACATCGACGGTGATAACGGAATCCTGCTTCACCGCGGCTACCCGATCGAGCAACTGGCCGAGCAGTCCGATTATCTGGAAACCTGCTACCTGCTGCTCAATGGCGAATTGCCAACTGCCGAGCAGAAAGCCCAGTTCGTTGCCGTGGTCAAGAACCACACGATGGTTCACGAACAGCTCAAGACCTTTTTCAACGGCTTCCGCCGTGATGCCCACCCGATGGCCGTCATGTGCGGCGTAGTCGGCGCCC
	13	OroborealAlpineGlacier	plant	sparse mixed grass-2	2018	ISL0323	CAATTCTGACGGGTACAGTGGGTCCGGACGTGATCGACGTACGCGGTCTCACCGCCACCGGCCGCTTCACATTTGACCCTGGCTTCATGTCCACGGCATCTTGCGAGTCGAAGATCACCTACATCGACGGTGATAACGGAATCCTGCTTCACCGCGGCTACCCGATCGAGCAACTGGCCGAGCAGTCCGATTATCTGGAAACCTGCTACCTGCTGCTCAATGGCGAATTGCCAACTGCCGAGCAGAAAGCCCAGTTCGTTGCCGTGGTCAAGAACCACACGATGGTTCACGAACAGCTCAAGACCTTTTTCAACGGCTTCCGCCGTGATGCCCACCCGATGGCCGTCATGTGCGGCGTAGTCGGCGCCC
	13	OroborealAlpineGlacier	plant	sparse mixed grass-2	2018	ISL0326	CAATTCTGACGGGTACAGTGGGTCCGGACGTGATCGACGTACGCGGTCTCACCGCCACCGGCCGCTTCACATTTGACCCTGGCTTCATGTCCACGGCATCTTGCGAGTCGAAGATCACCTACATCGACGGTGATAACGGAATCCTGCTTCACCGCGGCTACCCGATCGAGCAACTGGCCGAGCAGTCCGATTATCTGGAAACCTGCTACCTGCTGCTCAATGGCGAATTGCCAACTGCCGAGCAGAAAGCCCAGTTCGTTGCCGTGGTCAAGAACCACACGATGGTTCACGAACAGCTCAAGACCTTTTTCAACGGCTTCCGCCGTGATGCCCACCCGATGGCCGTCATGTGCGGCGTAGTCGGCGCCC
	13	OroborealAlpineGlacier	plant	sparse mixed grass-2	2018	ISL0327	CAATTCTGACGGGTACAGTGGGTCCGGACGTGATCGACGTACGCGGTCTCACCGCCACCGGCCGCTTCACATTTGACCCTGGCTTCATGTCCACGGCATCTTGCGAGTCGAAGATCACCTACATCGACGGTGATAACGGAATCCTGCTTCACCGCGGCTACCCGATCGAGCAACTGGCCGAGCAGTCCGATTATCTGGAAACCTGCTACCTGCTGCTCAATGGCGAATTGCCAACTGCCGAGCAGAAAGCCCAGTTCGTTGCCGTGGTCAAGAACCACACGATGGTTCACGAACAGCTCAAGACCTTTTTCAACGGCTTCCGCCGTGATGCCCACCCGATGGCCGTCATGTGCGGCGTAGTCGGCGCCC
	13	BoreoHeathMossGrass	moss	moss from mixed stand - location_4	2018	ISL0382	CAATTCTGACGGGTACAGTGGGTCCGGACGTGATCGACGTACGCGGTCTCACCGCCACCGGCCGCTTCACATTTGACCCTGGCTTCATGTCCACGGCATCTTGCGAGTCGAAGATCACCTACATCGACGGTGATAACGGAATCCTGCTTCACCGCGGCTACCCGATCGAGCAACTGGCCGAGCAGTCCGATTATCTGGAAACCTGCTACCTGCTGCTCAATGGCGAATTGCCAACTGCCGAGCAGAAAGCCCAGTTCGTTGCCGTGGTCAAGAACCACACGATGGTTCACGAACAGCTCAAGACCTTTTTCAACGGCTTCCGCCGTGATGCCCACCCGATGGCCGTCATGTGCGGCGTAGTCGGCGCCC
	14	forest	plant	Salix arctica	2020	EG2015_03	CAATTCTGACGGGTACAGTGGGTCCGGACGTGATCGACGTACGCGGTCTCACCGCCACCGGCCGCTTCACATTTGACCCTGGCTTCATGTCCACGGCATCTTGCGAGTCGAAGATCACCTACATCGACGGTGATAACGGAATCCTGCTTCACCGCGGCTACCCGATCGAACAACTGGCCGAGCAGTCCGATTACCTGGAAACCTGCTACCTGTTGCTCAATGGCGAATTGCCAACTGCCGAGCAGAAAGCCCAGTTCGTTGCCGTGGTCAAGAACCACACGATGGTTCACGAACAGCTCAAGACCTTTTTCAACGGCTTCCGCCGTGATGCCCACCCGATGGCCGTCATGTGCGGCGTAGTCGGCGCCC
	14	forest	plant	Salix arctica	2020	EG2015_08	CAATTCTGACGGGTACAGTGGGTCCGGACGTGATCGACGTACGCGGTCTCACCGCCACCGGCCGCTTCACATTTGACCCTGGCTTCATGTCCACGGCATCTTGCGAGTCGAAGATCACCTACATCGACGGTGATAACGGAATCCTGCTTCACCGCGGCTACCCGATCGAACAACTGGCCGAGCAGTCCGATTACCTGGAAACCTGCTACCTGTTGCTCAATGGCGAATTGCCAACTGCCGAGCAGAAAGCCCAGTTCGTTGCCGTGGTCAAGAACCACACGATGGTTCACGAACAGCTCAAGACCTTTTTCAACGGCTTCCGCCGTGATGCCCACCCGATGGCCGTCATGTGCGGCGTAGTCGGCGCCC
	14	forest	plant	Salix arctica	2020	EG2015_10	CAATTCTGACGGGTACAGTGGGTCCGGACGTGATCGACGTACGCGGTCTCACCGCCACCGGCCGCTTCACATTTGACCCTGGCTTCATGTCCACGGCATCTTGCGAGTCGAAGATCACCTACATCGACGGTGATAACGGAATCCTGCTTCACCGCGGCTACCCGATCGAACAACTGGCCGAGCAGTCCGATTACCTGGAAACCTGCTACCTGTTGCTCAATGGCGAATTGCCAACTGCCGAGCAGAAAGCCCAGTTCGTTGCCGTGGTCAAGAACCACACGATGGTTCACGAACAGCTCAAGACCTTTTTCAACGGCTTCCGCCGTGATGCCCACCCGATGGCCGTCATGTGCGGCGTAGTCGGCGCCC
	14	forest	plant	Salix arctica	2020	EG2015_13	CAATTCTGACGGGTACAGTGGGTCCGGACGTGATCGACGTACGCGGTCTCACCGCCACCGGCCGCTTCACATTTGACCCTGGCTTCATGTCCACGGCATCTTGCGAGTCGAAGATCACCTACATCGACGGTGATAACGGAATCCTGCTTCACCGCGGCTACCCGATCGAACAACTGGCCGAGCAGTCCGATTACCTGGAAACCTGCTACCTGTTGCTCAATGGCGAATTGCCAACTGCCGAGCAGAAAGCCCAGTTCGTTGCCGTGGTCAAGAACCACACGATGGTTCACGAACAGCTCAAGACCTTTTTCAACGGCTTCCGCCGTGATGCCCACCCGATGGCCGTCATGTGCGGCGTAGTCGGCGCCC
	14	forest	plant	Salix arctica	2020	EG2015_14	CAATTCTGACGGGTACAGTGGGTCCGGACGTGATCGACGTACGCGGTCTCACCGCCACCGGCCGCTTCACATTTGACCCTGGCTTCATGTCCACGGCATCTTGCGAGTCGAAGATCACCTACATCGACGGTGATAACGGAATCCTGCTTCACCGCGGCTACCCGATCGAACAACTGGCCGAGCAGTCCGATTACCTGGAAACCTGCTACCTGTTGCTCAATGGCGAATTGCCAACTGCCGAGCAGAAAGCCCAGTTCGTTGCCGTGGTCAAGAACCACACGATGGTTCACGAACAGCTCAAGACCTTTTTCAACGGCTTCCGCCGTGATGCCCACCCGATGGCCGTCATGTGCGGCGTAGTCGGCGCCC
	14	forest	plant	Salix arctica	2020	EG2015_15	CAATTCTGACGGGTACAGTGGGTCCGGACGTGATCGACGTACGCGGTCTCACCGCCACCGGCCGCTTCACATTTGACCCTGGCTTCATGTCCACGGCATCTTGCGAGTCGAAGATCACCTACATCGACGGTGATAACGGAATCCTGCTTCACCGCGGCTACCCGATCGAACAACTGGCCGAGCAGTCCGATTACCTGGAAACCTGCTACCTGTTGCTCAATGGCGAATTGCCAACTGCCGAGCAGAAAGCCCAGTTCGTTGCCGTGGTCAAGAACCACACGATGGTTCACGAACAGCTCAAGACCTTTTTCAACGGCTTCCGCCGTGATGCCCACCCGATGGCCGTCATGTGCGGCGTAGTCGGCGCCC
	14	forest	plant	Salix arctica	2020	EG2015_16	CAATTCTGACGGGTACAGTGGGTCCGGACGTGATCGACGTACGCGGTCTCACCGCCACCGGCCGCTTCACATTTGACCCTGGCTTCATGTCCACGGCATCTTGCGAGTCGAAGATCACCTACATCGACGGTGATAACGGAATCCTGCTTCACCGCGGCTACCCGATCGAACAACTGGCCGAGCAGTCCGATTACCTGGAAACCTGCTACCTGTTGCTCAATGGCGAATTGCCAACTGCCGAGCAGAAAGCCCAGTTCGTTGCCGTGGTCAAGAACCACACGATGGTTCACGAACAGCTCAAGACCTTTTTCAACGGCTTCCGCCGTGATGCCCACCCGATGGCCGTCATGTGCGGCGTAGTCGGCGCCC
	14	forest	plant	Salix arctica	2020	EG2015_18	CAATTCTGACGGGTACAGTGGGTCCGGACGTGATCGACGTACGCGGTCTCACCGCCACCGGCCGCTTCACATTTGACCCTGGCTTCATGTCCACGGCATCTTGCGAGTCGAAGATCACCTACATCGACGGTGATAACGGAATCCTGCTTCACCGCGGCTACCCGATCGAACAACTGGCCGAGCAGTCCGATTACCTGGAAACCTGCTACCTGTTGCTCAATGGCGAATTGCCAACTGCCGAGCAGAAAGCCCAGTTCGTTGCCGTGGTCAAGAACCACACGATGGTTCACGAACAGCTCAAGACCTTTTTCAACGGCTTCCGCCGTGATGCCCACCCGATGGCCGTCATGTGCGGCGTAGTCGGCGCCC
	14	forest	plant	Salix arctica	2020	EG2015_19	CAATTCTGACGGGTACAGTGGGTCCGGACGTGATCGACGTACGCGGTCTCACCGCCACCGGCCGCTTCACATTTGACCCTGGCTTCATGTCCACGGCATCTTGCGAGTCGAAGATCACCTACATCGACGGTGATAACGGAATCCTGCTTCACCGCGGCTACCCGATCGAACAACTGGCCGAGCAGTCCGATTACCTGGAAACCTGCTACCTGTTGCTCAATGGCGAATTGCCAACTGCCGAGCAGAAAGCCCAGTTCGTTGCCGTGGTCAAGAACCACACGATGGTTCACGAACAGCTCAAGACCTTTTTCAACGGCTTCCGCCGTGATGCCCACCCGATGGCCGTCATGTGCGGCGTAGTCGGCGCCC
	14	forest	plant	Salix arctica	2020	EG2015_20	CAATTCTGACGGGTACAGTGGGTCCGGACGTGATCGACGTACGCGGTCTCACCGCCACCGGCCGCTTCACATTTGACCCTGGCTTCATGTCCACGGCATCTTGCGAGTCGAAGATCACCTACATCGACGGTGATAACGGAATCCTGCTTCACCGCGGCTACCCGATCGAACAACTGGCCGAGCAGTCCGATTACCTGGAAACCTGCTACCTGTTGCTCAATGGCGAATTGCCAACTGCCGAGCAGAAAGCCCAGTTCGTTGCCGTGGTCAAGAACCACACGATGGTTCACGAACAGCTCAAGACCTTTTTCAACGGCTTCCGCCGTGATGCCCACCCGATGGCCGTCATGTGCGGCGTAGTCGGCGCCC
	14	forest	plant	Salix arctica	2020	EG2015_21	CAATTCTGACGGGTACAGTGGGTCCGGACGTGATCGACGTACGCGGTCTCACCGCCACCGGCCGCTTCACATTTGACCCTGGCTTCATGTCCACGGCATCTTGCGAGTCGAAGATCACCTACATCGACGGTGATAACGGAATCCTGCTTCACCGCGGCTACCCGATCGAACAACTGGCCGAGCAGTCCGATTACCTGGAAACCTGCTACCTGTTGCTCAATGGCGAATTGCCAACTGCCGAGCAGAAAGCCCAGTTCGTTGCCGTGGTCAAGAACCACACGATGGTTCACGAACAGCTCAAGACCTTTTTCAACGGCTTCCGCCGTGATGCCCACCCGATGGCCGTCATGTGCGGCGTAGTCGGCGCCC
	14	forest	plant	Salix arctica	2020	EG2015_22	CAATTCTGACGGGTACAGTGGGTCCGGACGTGATCGACGTACGCGGTCTCACCGCCACCGGCCGCTTCACATTTGACCCTGGCTTCATGTCCACGGCATCTTGCGAGTCGAAGATCACCTACATCGACGGTGATAACGGAATCCTGCTTCACCGCGGCTACCCGATCGAACAACTGGCCGAGCAGTCCGATTACCTGGAAACCTGCTACCTGTTGCTCAATGGCGAATTGCCAACTGCCGAGCAGAAAGCCCAGTTCGTTGCCGTGGTCAAGAACCACACGATGGTTCACGAACAGCTCAAGACCTTTTTCAACGGCTTCCGCCGTGATGCCCACCCGATGGCCGTCATGTGCGGCGTAGTCGGCGCCC
	14	forest	plant	Salix arctica	2020	EG2015_23	CAATTCTGACGGGTACAGTGGGTCCGGACGTGATCGACGTACGCGGTCTCACCGCCACCGGCCGCTTCACATTTGACCCTGGCTTCATGTCCACGGCATCTTGCGAGTCGAAGATCACCTACATCGACGGTGATAACGGAATCCTGCTTCACCGCGGCTACCCGATCGAACAACTGGCCGAGCAGTCCGATTACCTGGAAACCTGCTACCTGTTGCTCAATGGCGAATTGCCAACTGCCGAGCAGAAAGCCCAGTTCGTTGCCGTGGTCAAGAACCACACGATGGTTCACGAACAGCTCAAGACCTTTTTCAACGGCTTCCGCCGTGATGCCCACCCGATGGCCGTCATGTGCGGCGTAGTCGGCGCCC
	14	forest	plant	Salix arctica	2020	EG2015_24	CAATTCTGACGGGTACAGTGGGTCCGGACGTGATCGACGTACGCGGTCTCACCGCCACCGGCCGCTTCACATTTGACCCTGGCTTCATGTCCACGGCATCTTGCGAGTCGAAGATCACCTACATCGACGGTGATAACGGAATCCTGCTTCACCGCGGCTACCCGATCGAACAACTGGCCGAGCAGTCCGATTACCTGGAAACCTGCTACCTGTTGCTCAATGGCGAATTGCCAACTGCCGAGCAGAAAGCCCAGTTCGTTGCCGTGGTCAAGAACCACACGATGGTTCACGAACAGCTCAAGACCTTTTTCAACGGCTTCCGCCGTGATGCCCACCCGATGGCCGTCATGTGCGGCGTAGTCGGCGCCC
	14	forest	plant	Salix arctica	2020	EG2015_25	CAATTCTGACGGGTACAGTGGGTCCGGACGTGATCGACGTACGCGGTCTCACCGCCACCGGCCGCTTCACATTTGACCCTGGCTTCATGTCCACGGCATCTTGCGAGTCGAAGATCACCTACATCGACGGTGATAACGGAATCCTGCTTCACCGCGGCTACCCGATCGAACAACTGGCCGAGCAGTCCGATTACCTGGAAACCTGCTACCTGTTGCTCAATGGCGAATTGCCAACTGCCGAGCAGAAAGCCCAGTTCGTTGCCGTGGTCAAGAACCACACGATGGTTCACGAACAGCTCAAGACCTTTTTCAACGGCTTCCGCCGTGATGCCCACCCGATGGCCGTCATGTGCGGCGTAGTCGGCGCCC
	14	forest	plant	Salix arctica	2020	EG2015_26	CAATTCTGACGGGTACAGTGGGTCCGGACGTGATCGACGTACGCGGTCTCACCGCCACCGGCCGCTTCACATTTGACCCTGGCTTCATGTCCACGGCATCTTGCGAGTCGAAGATCACCTACATCGACGGTGATAACGGAATCCTGCTTCACCGCGGCTACCCGATCGAACAACTGGCCGAGCAGTCCGATTACCTGGAAACCTGCTACCTGTTGCTCAATGGCGAATTGCCAACTGCCGAGCAGAAAGCCCAGTTCGTTGCCGTGGTCAAGAACCACACGATGGTTCACGAACAGCTCAAGACCTTTTTCAACGGCTTCCGCCGTGATGCCCACCCGATGGCCGTCATGTGCGGCGTAGTCGGCGCCC
	14	forest	plant	Salix arctica	2020	EG2015_27	CAATTCTGACGGGTACAGTGGGTCCGGACGTGATCGACGTACGCGGTCTCACCGCCACCGGCCGCTTCACATTTGACCCTGGCTTCATGTCCACGGCATCTTGCGAGTCGAAGATCACCTACATCGACGGTGATAACGGAATCCTGCTTCACCGCGGCTACCCGATCGAACAACTGGCCGAGCAGTCCGATTACCTGGAAACCTGCTACCTGTTGCTCAATGGCGAATTGCCAACTGCCGAGCAGAAAGCCCAGTTCGTTGCCGTGGTCAAGAACCACACGATGGTTCACGAACAGCTCAAGACCTTTTTCAACGGCTTCCGCCGTGATGCCCACCCGATGGCCGTCATGTGCGGCGTAGTCGGCGCCC
	14	forest	plant	Salix arctica	2020	EG2015_28	CAATTCTGACGGGTACAGTGGGTCCGGACGTGATCGACGTACGCGGTCTCACCGCCACCGGCCGCTTCACATTTGACCCTGGCTTCATGTCCACGGCATCTTGCGAGTCGAAGATCACCTACATCGACGGTGATAACGGAATCCTGCTTCACCGCGGCTACCCGATCGAACAACTGGCCGAGCAGTCCGATTACCTGGAAACCTGCTACCTGTTGCTCAATGGCGAATTGCCAACTGCCGAGCAGAAAGCCCAGTTCGTTGCCGTGGTCAAGAACCACACGATGGTTCACGAACAGCTCAAGACCTTTTTCAACGGCTTCCGCCGTGATGCCCACCCGATGGCCGTCATGTGCGGCGTAGTCGGCGCCC
	14	forest	plant	Salix arctica	2020	EG2015_29	CAATTCTGACGGGTACAGTGGGTCCGGACGTGATCGACGTACGCGGTCTCACCGCCACCGGCCGCTTCACATTTGACCCTGGCTTCATGTCCACGGCATCTTGCGAGTCGAAGATCACCTACATCGACGGTGATAACGGAATCCTGCTTCACCGCGGCTACCCGATCGAACAACTGGCCGAGCAGTCCGATTACCTGGAAACCTGCTACCTGTTGCTCAATGGCGAATTGCCAACTGCCGAGCAGAAAGCCCAGTTCGTTGCCGTGGTCAAGAACCACACGATGGTTCACGAACAGCTCAAGACCTTTTTCAACGGCTTCCGCCGTGATGCCCACCCGATGGCCGTCATGTGCGGCGTAGTCGGCGCCC
	14	forest	plant	Salix arctica	2020	EG2015_30	CAATTCTGACGGGTACAGTGGGTCCGGACGTGATCGACGTACGCGGTCTCACCGCCACCGGCCGCTTCACATTTGACCCTGGCTTCATGTCCACGGCATCTTGCGAGTCGAAGATCACCTACATCGACGGTGATAACGGAATCCTGCTTCACCGCGGCTACCCGATCGAACAACTGGCCGAGCAGTCCGATTACCTGGAAACCTGCTACCTGTTGCTCAATGGCGAATTGCCAACTGCCGAGCAGAAAGCCCAGTTCGTTGCCGTGGTCAAGAACCACACGATGGTTCACGAACAGCTCAAGACCTTTTTCAACGGCTTCCGCCGTGATGCCCACCCGATGGCCGTCATGTGCGGCGTAGTCGGCGCCC
	14	forest	plant	Vaccinium uliginosum_x000D_	2020	EG2018_06	CAATTCTGACGGGTACAGTGGGTCCGGACGTGATCGACGTACGCGGTCTCACCGCCACCGGCCGCTTCACATTTGACCCTGGCTTCATGTCCACGGCATCTTGCGAGTCGAAGATCACCTACATCGACGGTGATAACGGAATCCTGCTTCACCGCGGCTACCCGATCGAACAACTGGCCGAGCAGTCCGATTACCTGGAAACCTGCTACCTGTTGCTCAATGGCGAATTGCCAACTGCCGAGCAGAAAGCCCAGTTCGTTGCCGTGGTCAAGAACCACACGATGGTTCACGAACAGCTCAAGACCTTTTTCAACGGCTTCCGCCGTGATGCCCACCCGATGGCCGTCATGTGCGGCGTAGTCGGCGCCC
	14	forest	plant	Vaccinium uliginosum_x000D_	2020	EG2018_10	CAATTCTGACGGGTACAGTGGGTCCGGACGTGATCGACGTACGCGGTCTCACCGCCACCGGCCGCTTCACATTTGACCCTGGCTTCATGTCCACGGCATCTTGCGAGTCGAAGATCACCTACATCGACGGTGATAACGGAATCCTGCTTCACCGCGGCTACCCGATCGAACAACTGGCCGAGCAGTCCGATTACCTGGAAACCTGCTACCTGTTGCTCAATGGCGAATTGCCAACTGCCGAGCAGAAAGCCCAGTTCGTTGCCGTGGTCAAGAACCACACGATGGTTCACGAACAGCTCAAGACCTTTTTCAACGGCTTCCGCCGTGATGCCCACCCGATGGCCGTCATGTGCGGCGTAGTCGGCGCCC
	14	forest	plant	Vaccinium uliginosum_x000D_	2020	EG2018_13	CAATTCTGACGGGTACAGTGGGTCCGGACGTGATCGACGTACGCGGTCTCACCGCCACCGGCCGCTTCACATTTGACCCTGGCTTCATGTCCACGGCATCTTGCGAGTCGAAGATCACCTACATCGACGGTGATAACGGAATCCTGCTTCACCGCGGCTACCCGATCGAACAACTGGCCGAGCAGTCCGATTACCTGGAAACCTGCTACCTGTTGCTCAATGGCGAATTGCCAACTGCCGAGCAGAAAGCCCAGTTCGTTGCCGTGGTCAAGAACCACACGATGGTTCACGAACAGCTCAAGACCTTTTTCAACGGCTTCCGCCGTGATGCCCACCCGATGGCCGTCATGTGCGGCGTAGTCGGCGCCC
	14	forest	plant	Vaccinium uliginosum_x000D_	2020	EG2018_14	CAATTCTGACGGGTACAGTGGGTCCGGACGTGATCGACGTACGCGGTCTCACCGCCACCGGCCGCTTCACATTTGACCCTGGCTTCATGTCCACGGCATCTTGCGAGTCGAAGATCACCTACATCGACGGTGATAACGGAATCCTGCTTCACCGCGGCTACCCGATCGAACAACTGGCCGAGCAGTCCGATTACCTGGAAACCTGCTACCTGTTGCTCAATGGCGAATTGCCAACTGCCGAGCAGAAAGCCCAGTTCGTTGCCGTGGTCAAGAACCACACGATGGTTCACGAACAGCTCAAGACCTTTTTCAACGGCTTCCGCCGTGATGCCCACCCGATGGCCGTCATGTGCGGCGTAGTCGGCGCCC
	14	forest	plant	Vaccinium uliginosum_x000D_	2020	EG2018_15	CAATTCTGACGGGTACAGTGGGTCCGGACGTGATCGACGTACGCGGTCTCACCGCCACCGGCCGCTTCACATTTGACCCTGGCTTCATGTCCACGGCATCTTGCGAGTCGAAGATCACCTACATCGACGGTGATAACGGAATCCTGCTTCACCGCGGCTACCCGATCGAACAACTGGCCGAGCAGTCCGATTACCTGGAAACCTGCTACCTGTTGCTCAATGGCGAATTGCCAACTGCCGAGCAGAAAGCCCAGTTCGTTGCCGTGGTCAAGAACCACACGATGGTTCACGAACAGCTCAAGACCTTTTTCAACGGCTTCCGCCGTGATGCCCACCCGATGGCCTGTCATGTGCGGCGTAGTCGGCGCCC
	14	forest	plant	Vaccinium uliginosum_x000D_	2020	EG2018_16	CAATTCTGACGGGTACAGTGGGTCCGGACGTGATCGACGTACGCGGTCTCACCGCCACCGGCCGCTTCACATTTGACCCTGGCTTCATGTCCACGGCATCTTGCGAGTCGAAGATCACCTACATCGACGGTGATAACGGAATCCTGCTTCACCGCGGCTACCCGATCGAACAACTGGCCGAGCAGTCCGATTACCTGGAAACCTGCTACCTGTTGCTCAATGGCGAATTGCCAACTGCCGAGCAGAAAGCCCAGTTCGTTGCCGTGGTCAAGAACCACACGATGGTTCACGAACAGCTCAAGACCTTTTTCAACGGCTTCCGCCGTGATGCCCACCCGATGGCCGTCATGTGCGGCGTAGTCGGCGCCC
	14	forest	plant	Vaccinium uliginosum_x000D_	2020	EG2018_20	CAATTCTGACGGGTACAGTGGGTCCGGACGTGATCGACGTACGCGGTCTCACCGCCACCGGCCGCTTCACATTTGACCCTGGCTTCATGTCCACGGCATCTTGCGAGTCGAAGATCACCTACATCGACGGTGATAACGGAATCCTGCTTCACCGCGGCTACCCGATCGAACAACTGGCCGAGCAGTCCGATTACCTGGAAACCTGCTACCTGTTGCTCAATGGCGAATTGCCAACTGCCGAGCAGAAAGCCCAGTTCGTTGCCGTGGTCAAGAACCACACGATGGTTCACGAACAGCTCAAGACCTTTTTCAACGGCTTCCGCCGTGATGCCCACCCGATGGCCGTCATGTGCGGCGTAGTCGGCGCCC
	15	forest	moss	Hylocomium splendens	2020	EG2002_01	CAATTCTGACGGGTACAGTGGGTCCGGACGTGATCGACGTACGCGGTCTCACCGCCACCGGCCGCTTCACATTTGACCCTGGCTTCATGTCCACGGCATCTTGCGAGTCGAAGATCACCTACATCGATGGTGATAACGGAATCCTGCTTCACCGCGGCTACCCGATCGAGCAACTGGCCGAGCAGTCCGATTATCTGGAAACCTGCTACCTGCTGCTCAACGGCGAACTGCCAACTGCCGAGCAGAAAGCCCAGTTCGTTGCCGTGGTCAAGAACCACACGATGGTTCACGAACAGCTCAAGACCTTTTTCAACGGCTTCCGCCGTGATGCCCACCCGATGGCCGTCATGTGCGGCGTGGTCGGTGCCC
	15	forest	moss	Hylocomium splendens	2020	EG2002_04	CAATTCTGACGGGTACAGTGGGTCCGGACGTGATCGACGTACGCGGTCTCACCGCCACCGGCCGCTTCACATTTGACCCTGGCTTCATGTCCACGGCATCTTGCGAGTCGAAGATCACCTACATCGATGGTGATAACGGAATCCTGCTTCACCGCGGCTACCCGATCGAGCAACTGGCCGAGCAGTCCGATTATCTGGAAACCTGCTACCTGCTGCTCAACGGCGAACTGCCAACTGCCGAGCAGAAAGCCCAGTTCGTTGCCGTGGTCAAGAACCACACGATGGTTCACGAACAGCTCAAGACCTTTTTCAACGGCTTCCGCCGTGATGCCCACCCGATGGCCGTCATGTGCGGCGTGGTCGGTGCCC
	15	forest	moss	Hylocomium splendens	2020	EG2002_10	CAATTCTGACGGGTACAGTGGGTCCGGACGTGATCGACGTACGCGGTCTCACCGCCACCGGCCGCTTCACATTTGACCCTGGCTTCATGTCCACGGCATCTTGCGAGTCGAAGATCACCTACATCGATGGTGATAACGGAATCCTGCTTCACCGCGGCTACCCGATCGAGCAACTGGCCGAGCAGTCCGATTATCTGGAAACCTGCTACCTGCTGCTCAACGGCGAACTGCCAACTGCCGAGCAGAAAGCCCAGTTCGTTGCCGTGGTCAAGAACCACACGATGGTTCACGAACAGCTCAAGACCTTTTTCAACGGCTTCCGCCGTGATGCCCACCCGATGGCCGTCATGTGCGGCGTGGTCGGTGCCC
	15	forest	moss	Hylocomium splendens	2020	EG2002_12	CAATTCTGACGGGTACAGTGGGTCCGGACGTGATCGACGTACGCGGTCTCACCGCCACCGGCCGCTTCACATTTGACCCTGGCTTCATGTCCACGGCATCTTGCGAGTCGAAGATCACCTACATCGATGGTGATAACGGAATCCTGCTTCACCGCGGCTACCCGATCGAGCAACTGGCCGAGCAGTCCGATTATCTGGAAACCTGCTACCTGCTGCTCAACGGCGAACTGCCAACTGCCGAGCAGAAAGCCCAGTTCGTTGCCGTGGTCAAGAACCACACGATGGTTCACGAACAGCTCAAGACCTTTTTCAACGGCTTCCGCCGTGATGCCCACCCGATGGCCGTCATGTGCGGCGTGGTCGGTGCCC
	16	forest	plant	Vaccinium uliginosum_x000D_	2020	EG2018_24	CAATTCTGACGGGGACAGTGGTCCGGACGTGATCGACGTACGCGGTCTTACCGCCACCGGCCGCTTCACATTTGACCCTGGCTTCATGTTCACGGCATCTTGCGAGTCGAAGATCACCTACATCGATGGTGATAACGGAATCCTGCTTCACCGCGGCTACCCGATCGAGCAACTGGGCGAGCAGTCCGATTATCTGGAAACCTGCTACCTGCTGCTCAATGGCGAACTGCCAACGCCGAGCAGAGAGCCCAGTTCGTTGCCGTGGTCAAGAACCACACGATGGTTCACGAACAGCTCAAGACCTTTTTCAACGGCTTCCGCCGTGATGCCCACCCGATGGCCGTCATGTGCGGCGTGGTCGGT
	16	forest	moss	Rhytidiadelphus loreus	2020	EG2019_03	CAATTCTGACGGGGACAGTGGTCCGGACGTGATCGACGTACGCGGTCTTACCGCCACCGGCCGCTTCACATTTGACCCTGGCTTCATGTTCACGGCATCTTGCGAGTCGAAGATCACCTACATCGATGGTGATAACGGAATCCTGCTTCACCGCGGCTACCCGATCGAGCAACTGGGCGAGCAGTCCGATTATCTGGAAACCTGCTACCTGCTGCTCAATGGCGAACTGCCAACGCCGAGCAGAGAGCCCAGTTCGTTGCCGTGGTCAAGAACCACACGATGGTTCACGAACAGCTCAAGACCTTTTTCAACGGCTTCCGCCGTGATGCCCACCCGATGGCCGTCATGTGCGGCGTGGTCGGT
	17	forest	moss	Rhytidiadelphus loreus	2020	EG2012_01	CAATTCTGACGGGTACAGTGGGTCCGGACGTGATCGACGTACGCGGTCTCACCGCCACCGGCCGCTTCACATTTGACCCTGGCTTCATGTCCACGGCATCTTGCGAGTCGAAGATCACCTACATCGATGGTGATAACGGAATCCTGCTTCACCGCGGCTACCCGATCGAGCAACTGGCCGAGCAGTCCGATTATCTGGAAACCTGCTACCTGCTGCTCAATGGCGAACTGCCAACTGCCGAGCAGAAAGCCCAGTTCGTTGCCGTGGTCAAGAACCACACGATGGTTCACGAACAGCTCAAGACCTTTTTCAACGGCTTCCGCCGTGATGCCCACCCGATGGCCGTCATGTGCGGCGTGGTCGGTGCCC
	17	forest	plant	Vaccinium uliginosum_x000D_	2020	EG2018_01	CAATTCTGACGGGTACAGTGGGTCCGGACGTGATCGACGTACGCGGTCTCACCGCCACCGGCCGCTTCACATTTGACCCTGGCTTCATGTCCACGGCATCTTGCGAGTCGAAGATCACCTACATCGATGGTGATAACGGAATCCTGCTTCACCGCGGCTACCCGATCGAGCAACTGGCCGAGCAGTCCGATTATCTGGAAACCTGCTACCTGCTGCTCAATGGCGAACTGCCAACTGCCGAGCAGAAAGCCCAGTTCGTTGCCGTGGTCAAGAACCACACGATGGTTCACGAACAGCTCAAGACCTTTTTCAACGGCTTCCGCCGTGATGCCCACCCGATGGCCGTCATGTGCGGCGTGGTCGGTGCCC
	17	forest	plant	Vaccinium uliginosum_x000D_	2020	EG2018_02	CAATTCTGACGGGTACAGTGGGTCCGGACGTGATCGACGTACGCGGTCTCACCGCCACCGGCCGCTTCACATTTGACCCTGGCTTCATGTCCACGGCATCTTGCGAGTCGAAGATCACCTACATCGATGGTGATAACGGAATCCTGCTTCACCGCGGCTACCCGATCGAGCAACTGGCCGAGCAGTCCGATTATCTGGAAACCTGCTACCTGCTGCTCAATGGCGAACTGCCAACTGCCGAGCAGAAAGCCCAGTTCGTTGCCGTGGTCAAGAACCACACGATGGTTCACGAACAGCTCAAGACCTTTTTCAACGGCTTCCGCCGTGATGCCCACCCGATGGCCGTCATGTGCGGCGTGGTCGGTGCCC
	17	forest	plant	Vaccinium uliginosum_x000D_	2020	EG2018_03	CAATTCTGACGGGTACAGTGGGTCCGGACGTGATCGACGTACGCGGTCTCACCGCCACCGGCCGCTTCACATTTGACCCTGGCTTCATGTCCACGGCATCTTGCGAGTCGAAGATCACCTACATCGATGGTGATAACGGAATCCTGCTTCACCGCGGCTACCCGATCGAGCAACTGGCCGAGCAGTCCGATTATCTGGAAACCTGCTACCTGCTGCTCAATGGCGAACTGCCAACTGCCGAGCAGAAAGCCCAGTTCGTTGCCGTGGTCAAGAACCACACGATGGTTCACGAACAGCTCAAGACCTTTTTCAACGGCTTCCGCCGTGATGCCCACCCGATGGCCGTCATGTGCGGCGTGGTCGGTGCCC
	17	forest	plant	Vaccinium uliginosum_x000D_	2020	EG2018_04	CAATTCTGACGGGTACAGTGGGTCCGGACGTGATCGACGTACGCGGTCTCACCGCCACCGGCCGCTTCACATTTGACCCTGGCTTCATGTCCACGGCATCTTGCGAGTCGAAGATCACCTACATCGATGGTGATAACGGAATCCTGCTTCACCGCGGCTACCCGATCGAGCAACTGGCCGAGCAGTCCGATTATCTGGAAACCTGCTACCTGCTGCTCAATGGCGAACTGCCAACTGCCGAGCAGAAAGCCCAGTTCGTTGCCGTGGTCAAGAACCACACGATGGTTCACGAACAGCTCAAGACCTTTTTCAACGGCTTCCGCCGTGATGCCCACCCGATGGCCGTCATGTGCGGCGTGGTCGGTGCCC
	17	forest	plant	Vaccinium uliginosum_x000D_	2020	EG2018_07	CAATTCTGACGGGTACAGTGGGTCCGGACGTGATCGACGTACGCGGTCTCACCGCCACCGGCCGCTTCACATTTGACCCTGGCTTCATGTCCACGGCATCTTGCGAGTCGAAGATCACCTACATCGATGGTGATAACGGAATCCTGCTTCACCGCGGCTACCCGATCGAGCAACTGGCCGAGCAGTCCGATTATCTGGAAACCTGCTACCTGCTGCTCAATGGCGAACTGCCAACTGCCGAGCAGAAAGCCCAGTTCGTTGCCGTGGTCAAGAACCACACGATGGTTCACGAACAGCTCAAGACCTTTTTCAACGGCTTCCGCCGTGATGCCCACCCGATGGCCGTCATGTGCGGCGTGGTCGGTGCCC
	17	forest	plant	Vaccinium uliginosum_x000D_	2020	EG2018_09	CAATTCTGACGGGTACAGTGGGTCCGGACGTGATCGACGTACGCGGTCTCACCGCCACCGGCCGCTTCACATTTGACCCTGGCTTCATGTCCACGGCATCTTGCGAGTCGAAGATCACCTACATCGATGGTGATAACGGAATCCTGCTTCACCGCGGCTACCCGATCGAGCAACTGGCCGAGCAGTCCGATTATCTGGAAACCTGCTACCTGCTGCTCAATGGCGAACTGCCAACTGCCGAGCAGAAAGCCCAGTTCGTTGCCGTGGTCAAGAACCACACGATGGTTCACGAACAGCTCAAGACCTTTTTCAACGGCTTCCGCCGTGATGCCCACCCGATGGCCGTCATGTGCGGCGTGGTCGGTGCCC
	18	forest	plant	mixed grasses	2020	BR2003_05	CAATTCTGACCGGCACAGTGGGTCCGGACGTGATCGACGTACGCGGACTGACCGCCACCGGCCGCTTCACATTTGACCCTGGCTTCATGTCCACGGCATCTTGCGAGTCGAAGATCACCTACATCGATGGTGACAATGGAATCCTGCTTCACCGCGGCTACCCTATCGAACAACTGGCCGAGCAGTCCGATTACCTCGAAACCTGTTACCTGCTGCTCAACGGCGAATTGCCCACCGCCGAACAGAAAGCCCAGTTTGTGGCCGTGGTCAAGAACCACACGATGGTTCACGAGCAACTCAAGACATTTTTCAACGGCTTCCGCCGCGATGCCCACCCGATGGCCGTCATGTGCGGCGTAGTCGGCGCCC
	18	forest	plant	mixed grasses	2020	BR2003_10	CAATTCTGACCGGCACAGTGGGTCCGGACGTGATCGACGTACGCGGACTGACCGCCACCGGCCGCTTCACATTTGACCCTGGCTTCATGTCCACGGCATCTTGCGAGTCGAAGATCACCTACATCGATGGTGACAATGGAATCCTGCTTCACCGCGGCTACCCTATCGAACAACTGGCCGAGCAGTCCGATTACCTCGAAACCTGTTACCTGCTGCTCAACGGCGAATTGCCCACCGCCGAACAGAAAGCCCAGTTTGTGGCCGTGGTCAAGAACCACACGATGGTTCACGAGCAACTCAAGACATTTTTCAACGGCTTCCGCCGCGATGCCCACCCGATGGCCGTCATGTGCGGCGTAGTCGGCGCCC
	18	forest	plant	mixed grasses	2020	BR2003_12	CAATTCTGACCGGCACAGTGGGTCCGGACGTGATCGACGTACGCGGACTGACCGCCACCGGCCGCTTCACATTTGACCCTGGCTTCATGTCCACGGCATCTTGCGAGTCGAAGATCACCTACATCGATGGTGACAATGGAATCCTGCTTCACCGCGGCTACCCTATCGAACAACTGGCCGAGCAGTCCGATTACCTCGAAACCTGTTACCTGCTGCTCAACGGCGAATTGCCCACCGCCGAACAGAAAGCCCAGTTTGTGGCCGTGGTCAAGAACCACACGATGGTTCACGAGCAACTCAAGACATTTTTCAACGGCTTCCGCCGCGATGCCCACCCGATGGCCGTCATGTGCGGCGTAGTCGGCGCCC
	18	forest	plant	mixed grasses	2020	BR2003_39	CAATTCTGACCGGCACAGTGGGTCCGGACGTGATCGACGTACGCGGACTGACCGCCACCGGCCGCTTCACATTTGACCCTGGCTTCATGTCCACGGCATCTTGCGAGTCGAAGATCACCTACATCGATGGTGACAATGGAATCCTGCTTCACCGCGGCTACCCTATCGAACAACTGGCCGAGCAGTCCGATTACCTCGAAACCTGTTACCTGCTGCTCAACGGCGAATTGCCCACCGCCGAACAGAAAGCCCAGTTTGTGGCCGTGGTCAAGAACCACACGATGGTTCACGAGCAACTCAAGACATTTTTCAACGGCTTCCGCCGCGATGCCCACCCGATGGCCGTCATGTGCGGCGTAGTCGGCGCCC
	18	forest	plant	mixed grasses	2020	BR2003_40	CAATTCTGACCGGCACAGTGGGTCCGGACGTGATCGACGTACGCGGACTGACCGCCACCGGCCGCTTCACATTTGACCCTGGCTTCATGTCCACGGCATCTTGCGAGTCGAAGATCACCTACATCGATGGTGACAATGGAATCCTGCTTCACCGCGGCTACCCTATCGAACAACTGGCCGAGCAGTCCGATTACCTCGAAACCTGTTACCTGCTGCTCAACGGCGAATTGCCCACCGCCGAACAGAAAGCCCAGTTTGTGGCCGTGGTCAAGAACCACACGATGGTTCACGAGCAACTCAAGACATTTTTCAACGGCTTCCGCCGCGATGCCCACCCGATGGCCGTCATGTGCGGCGTAGTCGGCGCCC
	18	forest	plant	mixed grasses	2020	BR2003_46	CAATTCTGACCGGCACAGTGGGTCCGGACGTGATCGACGTACGCGGACTGACCGCCACCGGCCGCTTCACATTTGACCCTGGCTTCATGTCCACGGCATCTTGCGAGTCGAAGATCACCTACATCGATGGTGACAATGGAATCCTGCTTCACCGCGGCTACCCTATCGAACAACTGGCCGAGCAGTCCGATTACCTCGAAACCTGTTACCTGCTGCTCAACGGCGAATTGCCCACCGCCGAACAGAAAGCCCAGTTTGTGGCCGTGGTCAAGAACCACACGATGGTTCACGAGCAACTCAAGACATTTTTCAACGGCTTCCGCCGCGATGCCCACCCGATGGCCGTCATGTGCGGCGTAGTCGGCGCCC
	19	forest	plant	mixed grasses	2020	BR2003_11	CAATTCTGACCGGTACAGTGGGTCCGGACGTGATCGACGTACGCGGACTGACCGCCACCGGCCGCTTCACATTTGACCCTGGCTTCATGTCCACGGCATCTTGCGAGTCGAAGATCACCTACATCGATGGTGACAATGGAATCCTGCTTCACCGCGGCTACCCTATCGAACAACTGGCCGAGCAGTCCGATTACCTCGAAACCTGTTACCTGCTGCTCAACGGCGAATTGCCCACCGCCGAACAGAAAGCCCAGTTTGTGGCCGTGGTCAAGAACCACACGATGGTTCACGAGCAACTCAAGACATTTTTCAACGGCTTCCGCCGCGATGCCCACCCGATGGCCGTCATGTGCGGCGTAGTCGGCGCCC
	19	forest	plant	mixed grasses	2020	BR2003_42	CAATTCTGACCGGTACAGTGGGTCCGGACGTGATCGACGTACGCGGACTGACCGCCACCGGCCGCTTCACATTTGACCCTGGCTTCATGTCCACGGCATCTTGCGAGTCGAAGATCACCTACATCGATGGTGACAATGGAATCCTGCTTCACCGCGGCTACCCTATCGAACAACTGGCCGAGCAGTCCGATTACCTCGAAACCTGTTACCTGCTGCTCAACGGCGAATTGCCCACCGCCGAACAGAAAGCCCAGTTTGTGGCCGTGGTCAAGAACCACACGATGGTTCACGAGCAACTCAAGACATTTTTCAACGGCTTCCGCCGCGATGCCCACCCGATGGCCGTCATGTGCGGCGTAGTCGGCGCCC
	20	forest	plant	mixed grasses	2020	BR2003_08	CAATTCTGACCGGTACAGTGGGTCCGGACGTGATCGACGTACGCGGCCTGACCGCCACCGGCCGCTTCACATTTGACCCTGGTTTCATGTCCACGGCCTCTTGCGATTCGAAGATCACCTACATCGATGGTGATAATGGCATTCTGCTACACCGCGGCTACCCGATCGAACAACTGGCCGAGCAGTCCGACTATCTCGAAACCTGCTACCTGCTGCTCAACGGTGAACTGCCCACCGCCGAGCAGAAAGCCCAGTTCGTGGCCGTGGTCAAGAACCACACGATGGTTCACGAACAGCTCAAGACCTTTTTCAACGGTTTCCGCCGCGACGCCCACCCGATGGCCGTCATGTGTGGCGTAGTCGGCGCCC
	20	forest	plant	Vaccinium uliginosum_x000D_	2020	EG2018_05	CAATTCTGACCGGTACAGTGGGTCCGGACGTGATCGACGTACGCGGCCTGACCGCCACCGGCCGCTTCACATTTGACCCTGGTTTCATGTCCACGGCCTCTTGCGATTCGAAGATCACCTACATCGATGGTGATAATGGCATTCTGCTACACCGCGGCTACCCGATCGAACAACTGGCCGAGCAGTCCGACTATCTCGAAACCTGCTACCTGCTGCTCAACGGTGAACTGCCCACCGCCGAGCAGAAAGCCCAGTTCGTGGCCGTGGTCAAGAACCACACGATGGTTCACGAACAGCTCAAGACCTTTTTCAACGGTTTCCGCCGCGACGCCCACCCGATGGCCGTCATGTGTGGCGTAGTCGGCGCCC
	20	forest	plant	Vaccinium uliginosum_x000D_	2020	EG2018_08	CAATTCTGACCGGTACAGTGGGTCCGGACGTGATCGACGTACGCGGCCTGACCGCCACCGGCCGCTTCACATTTGACCCTGGTTTCATGTCCACGGCCTCTTGCGATTCGAAGATCACCTACATCGATGGTGATAATGGCATTCTGCTACACCGCGGCTACCCGATCGAACAACTGGCCGAGCAGTCCGACTATCTCGAAACCTGCTACCTGCTGCTCAACGGTGAACTGCCCACCGCCGAGCAGAAAGCCCAGTTCGTGGCCGTGGTCAAGAACCACACGATGGTTCACGAACAGCTCAAGACCTTTTTCAACGGTTTCCGCCGCGACGCCCACCCGATGGCCGTCATGTGTGGCGTAGTCGGCGCCC
	20	forest	plant	Vaccinium uliginosum_x000D_	2020	EG2018_17	CAATTCTGACCGGTACAGTGGGTCCGGACGTGATCGACGTACGCGGCCTGACCGCCACCGGCCGCTTCACATTTGACCCTGGTTTCATGTCCACGGCCTCTTGCGATTCGAAGATCACCTACATCGATGGTGATAATGGCATTCTGCTACACCGCGGCTACCCGATCGAACAACTGGCCGAGCAGTCCGACTATCTCGAAACCTGCTACCTGCTGCTCAACGGTGAACTGCCCACCGCCGAGCAGAAAGCCCAGTTCGTGGCCGTGGTCAAGAACCACACGATGGTTCACGAACAGCTCAAGACCTTTTTCAACGGTTTCCGCCGCGACGCCCACCCGATGGCCGTCATGTGTGGCGTAGTCGGCGCCC
	20	forest	moss	Rhytidiadelphus loreus	2020	EG2019_12	CAATTCTGACCGGTACAGTGGGTCCGGACGTGATCGACGTACGCGGCCTGACCGCCACCGGCCGCTTCACATTTGACCCTGGTTTCATGTCCACGGCCTCTTGCGATTCGAAGATCACCTACATCGATGGTGATAATGGCATTCTGCTACACCGCGGCTACCCGATCGAACAACTGGCCGAGCAGTCCGACTATCTCGAAACCTGCTACCTGCTGCTCAACGGTGAACTGCCCACCGCCGAGCAGAAAGCCCAGTTCGTGGCCGTGGTCAAGAACCACACGATGGTTCACGAACAGCTCAAGACCTTTTTCAACGGTTTCCGCCGCGACGCCCACCCGATGGCCGTCATGTGTGGCGTAGTCGGCGCCC
	20	forest	moss	Rhytidiadelphus loreus	2020	EG2019_21	CAATTCTGACCGGTACAGTGGGTCCGGACGTGATCGACGTACGCGGCCTGACCGCCACCGGCCGCTTCACATTTGACCCTGGTTTCATGTCCACGGCCTCTTGCGATTCGAAGATCACCTACATCGATGGTGATAATGGCATTCTGCTACACCGCGGCTACCCGATCGAACAACTGGCCGAGCAGTCCGACTATCTCGAAACCTGCTACCTGCTGCTCAACGGTGAACTGCCCACCGCCGAGCAGAAAGCCCAGTTCGTGGCCGTGGTCAAGAACCACACGATGGTTCACGAACAGCTCAAGACCTTTTTCAACGGTTTCCGCCGCGACGCCCACCCGATGGCCGTCATGTGTGGCGTAGTCGGCGCCC
	20	forest	moss	Hylocomium splendens	2020	EG2022_06	CAATTCTGACCGGTACAGTGGGTCCGGACGTGATCGACGTACGCGGCCTGACCGCCACCGGCCGCTTCACATTTGACCCTGGTTTCATGTCCACGGCCTCTTGCGATTCGAAGATCACCTACATCGATGGTGATAATGGCATTCTGCTACACCGCGGCTACCCGATCGAACAACTGGCCGAGCAGTCCGACTATCTCGAAACCTGCTACCTGCTGCTCAACGGTGAACTGCCCACCGCCGAGCAGAAAGCCCAGTTCGTGGCCGTGGTCAAGAACCACACGATGGTTCACGAACAGCTCAAGACCTTTTTCAACGGTTTCCGCCGCGACGCCCACCCGATGGCCGTCATGTGTGGCGTAGTCGGCGCCC
	20	forest	moss	Hylocomium splendens	2020	EG2022_11	CAATTCTGACCGGTACAGTGGGTCCGGACGTGATCGACGTACGCGGCCTGACCGCCACCGGCCGCTTCACATTTGACCCTGGTTTCATGTCCACGGCCTCTTGCGATTCGAAGATCACCTACATCGATGGTGATAATGGCATTCTGCTACACCGCGGCTACCCGATCGAACAACTGGCCGAGCAGTCCGACTATCTCGAAACCTGCTACCTGCTGCTCAACGGTGAACTGCCCACCGCCGAGCAGAAAGCCCAGTTCGTGGCCGTGGTCAAGAACCACACGATGGTTCACGAACAGCTCAAGACCTTTTTCAACGGTTTCCGCCGCGACGCCCACCCGATGGCCGTCATGTGTGGCGTAGTCGGCGCCC
	20	forest	moss	Hylocomium splendens	2020	EG2022_12	CAATTCTGACCGGTACAGTGGGTCCGGACGTGATCGACGTACGCGGCCTGACCGCCACCGGCCGCTTCACATTTGACCCTGGTTTCATGTCCACGGCCTCTTGCGATTCGAAGATCACCTACATCGATGGTGATAATGGCATTCTGCTACACCGCGGCTACCCGATCGAACAACTGGCCGAGCAGTCCGACTATCTCGAAACCTGCTACCTGCTGCTCAACGGTGAACTGCCCACCGCCGAGCAGAAAGCCCAGTTCGTGGCCGTGGTCAAGAACCACACGATGGTTCACGAACAGCTCAAGACCTTTTTCAACGGTTTCCGCCGCGACGCCCACCCGATGGCCGTCATGTGTGGCGTAGTCGGCGCCC
	20	forest	moss	Hylocomium splendens	2020	EG2022_13	CAATTCTGACCGGTACAGTGGGTCCGGACGTGATCGACGTACGCGGCCTGACCGCCACCGGCCGCTTCACATTTGACCCTGGTTTCATGTCCACGGCCTCTTGCGATTCGAAGATCACCTACATCGATGGTGATAATGGCATTCTGCTACACCGCGGCTACCCGATCGAACAACTGGCCGAGCAGTCCGACTATCTCGAAACCTGCTACCTGCTGCTCAACGGTGAACTGCCCACCGCCGAGCAGAAAGCCCAGTTCGTGGCCGTGGTCAAGAACCACACGATGGTTCACGAACAGCTCAAGACCTTTTTCAACGGTTTCCGCCGCGACGCCCACCCGATGGCCGTCATGTGTGGCGTAGTCGGCGCCC
	20	forest	moss	Hylocomium splendens	2020	EG2022_14	CAATTCTGACCGGTACAGTGGGTCCGGACGTGATCGACGTACGCGGCCTGACCGCCACCGGCCGCTTCACATTTGACCCTGGTTTCATGTCCACGGCCTCTTGCGATTCGAAGATCACCTACATCGATGGTGATAATGGCATTCTGCTACACCGCGGCTACCCGATCGAACAACTGGCCGAGCAGTCCGACTATCTCGAAACCTGCTACCTGCTGCTCAACGGTGAACTGCCCACCGCCGAGCAGAAAGCCCAGTTCGTGGCCGTGGTCAAGAACCACACGATGGTTCACGAACAGCTCAAGACCTTTTTCAACGGTTTCCGCCGCGACGCCCACCCGATGGCCGTCATGTGTGGCGTAGTCGGCGCCC
	20	forest	moss	Hylocomium splendens	2020	EG2022_15	CAATTCTGACCGGTACAGTGGGTCCGGACGTGATCGACGTACGCGGCCTGACCGCCACCGGCCGCTTCACATTTGACCCTGGTTTCATGTCCACGGCCTCTTGCGATTCGAAGATCACCTACATCGATGGTGATAATGGCATTCTGCTACACCGCGGCTACCCGATCGAACAACTGGCCGAGCAGTCCGACTATCTCGAAACCTGCTACCTGCTGCTCAACGGTGAACTGCCCACCGCCGAGCAGAAAGCCCAGTTCGTGGCCGTGGTCAAGAACCACACGATGGTTCACGAACAGCTCAAGACCTTTTTCAACGGTTTCCGCCGCGACGCCCACCCGATGGCCGTCATGTGTGGCGTAGTCGGCGCCC
	20	forest	moss	Hylocomium splendens	2020	EG2022_16	CAATTCTGACCGGTACAGTGGGTCCGGACGTGATCGACGTACGCGGCCTGACCGCCACCGGCCGCTTCACATTTGACCCTGGTTTCATGTCCACGGCCTCTTGCGATTCGAAGATCACCTACATCGATGGTGATAATGGCATTCTGCTACACCGCGGCTACCCGATCGAACAACTGGCCGAGCAGTCCGACTATCTCGAAACCTGCTACCTGCTGCTCAACGGTGAACTGCCCACCGCCGAGCAGAAAGCCCAGTTCGTGGCCGTGGTCAAGAACCACACGATGGTTCACGAACAGCTCAAGACCTTTTTCAACGGTTTCCGCCGCGACGCCCACCCGATGGCCGTCATGTGTGGCGTAGTCGGCGCCC
	20	forest	moss	Hylocomium splendens	2020	EG2022_17	CAATTCTGACCGGTACAGTGGGTCCGGACGTGATCGACGTACGCGGCCTGACCGCCACCGGCCGCTTCACATTTGACCCTGGTTTCATGTCCACGGCCTCTTGCGATTCGAAGATCACCTACATCGATGGTGATAATGGCATTCTGCTACACCGCGGCTACCCGATCGAACAACTGGCCGAGCAGTCCGACTATCTCGAAACCTGCTACCTGCTGCTCAACGGTGAACTGCCCACCGCCGAGCAGAAAGCCCAGTTCGTGGCCGTGGTCAAGAACCACACGATGGTTCACGAACAGCTCAAGACCTTTTTCAACGGTTTCCGCCGCGACGCCCACCCGATGGCCGTCATGTGTGGCGTAGTCGGCGCCC
	20	forest	moss	Hylocomium splendens	2020	EG2022_18	CAATTCTGACCGGTACAGTGGGTCCGGACGTGATCGACGTACGCGGCCTGACCGCCACCGGCCGCTTCACATTTGACCCTGGTTTCATGTCCACGGCCTCTTGCGATTCGAAGATCACCTACATCGATGGTGATAATGGCATTCTGCTACACCGCGGCTACCCGATCGAACAACTGGCCGAGCAGTCCGACTATCTCGAAACCTGCTACCTGCTGCTCAACGGTGAACTGCCCACCGCCGAGCAGAAAGCCCAGTTCGTGGCCGTGGTCAAGAACCACACGATGGTTCACGAACAGCTCAAGACCTTTTTCAACGGTTTCCGCCGCGACGCCCACCCGATGGCCGTCATGTGTGGCGTAGTCGGCGCCC
	20	forest	moss	Hylocomium splendens	2020	EG2022_19	CAATTCTGACCGGTACAGTGGGTCCGGACGTGATCGACGTACGCGGCCTGACCGCCACCGGCCGCTTCACATTTGACCCTGGTTTCATGTCCACGGCCTCTTGCGATTCGAAGATCACCTACATCGATGGTGATAATGGCATTCTGCTACACCGCGGCTACCCGATCGAACAACTGGCCGAGCAGTCCGACTATCTCGAAACCTGCTACCTGCTGCTCAACGGTGAACTGCCCACCGCCGAGCAGAAAGCCCAGTTCGTGGCCGTGGTCAAGAACCACACGATGGTTCACGAACAGCTCAAGACCTTTTTCAACGGTTTCCGCCGCGACGCCCACCCGATGGCCGTCATGTGTGGCGTAGTCGGCGCCC
	20	forest	moss	Hylocomium splendens	2020	EG2022_20	CAATTCTGACCGGTACAGTGGGTCCGGACGTGATCGACGTACGCGGCCTGACCGCCACCGGCCGCTTCACATTTGACCCTGGTTTCATGTCCACGGCCTCTTGCGATTCGAAGATCACCTACATCGATGGTGATAATGGCATTCTGCTACACCGCGGCTACCCGATCGAACAACTGGCCGAGCAGTCCGACTATCTCGAAACCTGCTACCTGCTGCTCAACGGTGAACTGCCCACCGCCGAGCAGAAAGCCCAGTTCGTGGCCGTGGTCAAGAACCACACGATGGTTCACGAACAGCTCAAGACCTTTTTCAACGGTTTCCGCCGCGACGCCCACCCGATGGCCGTCATGTGTGGCGTAGTCGGCGCCC
	20	forest	moss	Hylocomium splendens	2020	EG2022_21	CAATTCTGACCGGTACAGTGGGTCCGGACGTGATCGACGTACGCGGCCTGACCGCCACCGGCCGCTTCACATTTGACCCTGGTTTCATGTCCACGGCCTCTTGCGATTCGAAGATCACCTACATCGATGGTGATAATGGCATTCTGCTACACCGCGGCTACCCGATCGAACAACTGGCCGAGCAGTCCGACTATCTCGAAACCTGCTACCTGCTGCTCAACGGTGAACTGCCCACCGCCGAGCAGAAAGCCCAGTTCGTGGCCGTGGTCAAGAACCACACGATGGTTCACGAACAGCTCAAGACCTTTTTCAACGGTTTCCGCCGCGACGCCCACCCGATGGCCGTCATGTGTGGCGTAGTCGGCGCCC
	20	forest	moss	Hylocomium splendens	2020	EG2022_23	CAATTCTGACCGGTACAGTGGGTCCGGACGTGATCGACGTACGCGGCCTGACCGCCACCGGCCGCTTCACATTTGACCCTGGTTTCATGTCCACGGCCTCTTGCGATTCGAAGATCACCTACATCGATGGTGATAATGGCATTCTGCTACACCGCGGCTACCCGATCGAACAACTGGCCGAGCAGTCCGACTATCTCGAAACCTGCTACCTGCTGCTCAACGGTGAACTGCCCACCGCCGAGCAGAAAGCCCAGTTCGTGGCCGTGGTCAAGAACCACACGATGGTTCACGAACAGCTCAAGACCTTTTTCAACGGTTTCCGCCGCGACGCCCACCCGATGGCCGTCATGTGTGGCGTAGTCGGCGCCC
	20	GrazedPasture	plant	farm grass_1	2018	ISL0007	CAATTCTGACCGGTACAGTGGGTCCGGACGTGATCGACGTACGCGGCCTGACCGCCACCGGCCGCTTCACATTTGACCCTGGTTTCATGTCCACGGCCTCTTGCGATTCGAAGATCACCTACATCGATGGTGATAATGGCATTCTGCTACACCGCGGCTACCCGATCGAACAACTGGCCGAGCAGTCCGACTATCTCGAAACCTGCTACCTGCTGCTCAACGGTGAACTGCCCACCGCCGAGCAGAAAGCCCAGTTCGTGGCCGTGGTCAAGAACCACACGATGGTTCACGAACAGCTCAAGACCTTTTTCAACGGTTTCCGCCGCGACGCCCACCCGATGGCCGTCATGTGTGGCGTAGTCGGCGCCC
	20	GrazedPasture	plant	farm grass_1	2018	ISL0009	CAATTCTGACCGGTACAGTGGGTCCGGACGTGATCGACGTACGCGGCCTGACCGCCACCGGCCGCTTCACATTTGACCCTGGTTTCATGTCCACGGCCTCTTGCGATTCGAAGATCACCTACATCGATGGTGATAATGGCATTCTGCTACACCGCGGCTACCCGATCGAACAACTGGCCGAGCAGTCCGACTATCTCGAAACCTGCTACCTGCTGCTCAACGGTGAACTGCCCACCGCCGAGCAGAAAGCCCAGTTCGTGGCCGTGGTCAAGAACCACACGATGGTTCACGAACAGCTCAAGACCTTTTTCAACGGTTTCCGCCGCGACGCCCACCCGATGGCCGTCATGTGTGGCGTAGTCGGCGCCC
	20	GrazedPasture	plant	farm grass_2	2018	ISL0033	CAATTCTGACCGGTACAGTGGGTCCGGACGTGATCGACGTACGCGGCCTGACCGCCACCGGCCGCTTCACATTTGACCCTGGTTTCATGTCCACGGCCTCTTGCGATTCGAAGATCACCTACATCGATGGTGATAATGGCATTCTGCTACACCGCGGCTACCCGATCGAACAACTGGCCGAGCAGTCCGACTATCTCGAAACCTGCTACCTGCTGCTCAACGGTGAACTGCCCACCGCCGAGCAGAAAGCCCAGTTCGTGGCCGTGGTCAAGAACCACACGATGGTTCACGAACAGCTCAAGACCTTTTTCAACGGTTTCCGCCGCGACGCCCACCCGATGGCCGTCATGTGTGGCGTAGTCGGCGCCC
	20	GrazedPasture	plant	farm grass_2	2018	ISL0043	CAATTCTGACCGGTACAGTGGGTCCGGACGTGATCGACGTACGCGGCCTGACCGCCACCGGCCGCTTCACATTTGACCCTGGTTTCATGTCCACGGCCTCTTGCGATTCGAAGATCACCTACATCGATGGTGATAATGGCATTCTGCTACACCGCGGCTACCCGATCGAACAACTGGCCGAGCAGTCCGACTATCTCGAAACCTGCTACCTGCTGCTCAACGGTGAACTGCCCACCGCCGAGCAGAAAGCCCAGTTCGTGGCCGTGGTCAAGAACCACACGATGGTTCACGAACAGCTCAAGACCTTTTTCAACGGTTTCCGCCGCGACGCCCACCCGATGGCCGTCATGTGTGGCGTAGTCGGCGCCC
	20	GrazedPasture	plant	farm grass_2	2018	ISL0045	CAATTCTGACCGGTACAGTGGGTCCGGACGTGATCGACGTACGCGGCCTGACCGCCACCGGCCGCTTCACATTTGACCCTGGTTTCATGTCCACGGCCTCTTGCGATTCGAAGATCACCTACATCGATGGTGATAATGGCATTCTGCTACACCGCGGCTACCCGATCGAACAACTGGCCGAGCAGTCCGACTATCTCGAAACCTGCTACCTGCTGCTCAACGGTGAACTGCCCACCGCCGAGCAGAAAGCCCAGTTCGTGGCCGTGGTCAAGAACCACACGATGGTTCACGAACAGCTCAAGACCTTTTTCAACGGTTTCCGCCGCGACGCCCACCCGATGGCCGTCATGTGTGGCGTAGTCGGCGCCC
	20	GrazedPasture	plant	farm grass_2	2018	ISL0046	CAATTCTGACCGGTACAGTGGGTCCGGACGTGATCGACGTACGCGGCCTGACCGCCACCGGCCGCTTCACATTTGACCCTGGTTTCATGTCCACGGCCTCTTGCGATTCGAAGATCACCTACATCGATGGTGATAATGGCATTCTGCTACACCGCGGCTACCCGATCGAACAACTGGCCGAGCAGTCCGACTATCTCGAAACCTGCTACCTGCTGCTCAACGGTGAACTGCCCACCGCCGAGCAGAAAGCCCAGTTCGTGGCCGTGGTCAAGAACCACACGATGGTTCACGAACAGCTCAAGACCTTTTTCAACGGTTTCCGCCGCGACGCCCACCCGATGGCCGTCATGTGTGGCGTAGTCGGCGCCC
	20	GrazedPasture	plant	farm grass_2	2018	ISL0047	CAATTCTGACCGGTACAGTGGGTCCGGACGTGATCGACGTACGCGGCCTGACCGCCACCGGCCGCTTCACATTTGACCCTGGTTTCATGTCCACGGCCTCTTGCGATTCGAAGATCACCTACATCGATGGTGATAATGGCATTCTGCTACACCGCGGCTACCCGATCGAACAACTGGCCGAGCAGTCCGACTATCTCGAAACCTGCTACCTGCTGCTCAACGGTGAACTGCCCACCGCCGAGCAGAAAGCCCAGTTCGTGGCCGTGGTCAAGAACCACACGATGGTTCACGAACAGCTCAAGACCTTTTTCAACGGTTTCCGCCGCGACGCCCACCCGATGGCCGTCATGTGTGGCGTAGTCGGCGCCC
	20	GrazedPasture	plant	farm grass_2	2018	ISL0048	CAATTCTGACCGGTACAGTGGGTCCGGACGTGATCGACGTACGCGGCCTGACCGCCACCGGCCGCTTCACATTTGACCCTGGTTTCATGTCCACGGCCTCTTGCGATTCGAAGATCACCTACATCGATGGTGATAATGGCATTCTGCTACACCGCGGCTACCCGATCGAACAACTGGCCGAGCAGTCCGACTATCTCGAAACCTGCTACCTGCTGCTCAACGGTGAACTGCCCACCGCCGAGCAGAAAGCCCAGTTCGTGGCCGTGGTCAAGAACCACACGATGGTTCACGAACAGCTCAAGACCTTTTTCAACGGTTTCCGCCGCGACGCCCACCCGATGGCCGTCATGTGTGGCGTAGTCGGCGCCC
	20	GrazedPasture	plant	farm grass_2	2018	ISL0054	CAATTCTGACCGGTACAGTGGGTCCGGACGTGATCGACGTACGCGGCCTGACCGCCACCGGCCGCTTCACATTTGACCCTGGTTTCATGTCCACGGCCTCTTGCGATTCGAAGATCACCTACATCGATGGTGATAATGGCATTCTGCTACACCGCGGCTACCCGATCGAACAACTGGCCGAGCAGTCCGACTATCTCGAAACCTGCTACCTGCTGCTCAACGGTGAACTGCCCACCGCCGAGCAGAAAGCCCAGTTCGTGGCCGTGGTCAAGAACCACACGATGGTTCACGAACAGCTCAAGACCTTTTTCAACGGTTTCCGCCGCGACGCCCACCCGATGGCCGTCATGTGTGGCGTAGTCGGCGCCC
	20	GrazedPasture	plant	pasture grass and clover	2019	ISL0405	CAATTCTGACCGGTACAGTGGGTCCGGACGTGATCGACGTACGCGGCCTGACCGCCACCGGCCGCTTCACATTTGACCCTGGTTTCATGTCCACGGCCTCTTGCGATTCGAAGATCACCTACATCGATGGTGATAATGGCATTCTGCTACACCGCGGCTACCCGATCGAACAACTGGCCGAGCAGTCCGACTATCTCGAAACCTGCTACCTGCTGCTCAACGGTGAACTGCCCACCGCCGAGCAGAAAGCCCAGTTCGTGGCCGTGGTCAAGAACCACACGATGGTTCACGAACAGCTCAAGACCTTTTTCAACGGTTTCCGCCGCGACGCCCACCCGATGGCCGTCATGTGTGGCGTAGTCGGCGCCC
	20	GrazedPasture	plant	pasture grass and clover	2019	ISL0406	CAATTCTGACCGGTACAGTGGGTCCGGACGTGATCGACGTACGCGGCCTGACCGCCACCGGCCGCTTCACATTTGACCCTGGTTTCATGTCCACGGCCTCTTGCGATTCGAAGATCACCTACATCGATGGTGATAATGGCATTCTGCTACACCGCGGCTACCCGATCGAACAACTGGCCGAGCAGTCCGACTATCTCGAAACCTGCTACCTGCTGCTCAACGGTGAACTGCCCACCGCCGAGCAGAAAGCCCAGTTCGTGGCCGTGGTCAAGAACCACACGATGGTTCACGAACAGCTCAAGACCTTTTTCAACGGTTTCCGCCGCGACGCCCACCCGATGGCCGTCATGTGTGGCGTAGTCGGCGCCC
	20	GrazedPasture	plant	pasture grass and clover	2019	ISL0407	CAATTCTGACCGGTACAGTGGGTCCGGACGTGATCGACGTACGCGGCCTGACCGCCACCGGCCGCTTCACATTTGACCCTGGTTTCATGTCCACGGCCTCTTGCGATTCGAAGATCACCTACATCGATGGTGATAATGGCATTCTGCTACACCGCGGCTACCCGATCGAACAACTGGCCGAGCAGTCCGACTATCTCGAAACCTGCTACCTGCTGCTCAACGGTGAACTGCCCACCGCCGAGCAGAAAGCCCAGTTCGTGGCCGTGGTCAAGAACCACACGATGGTTCACGAACAGCTCAAGACCTTTTTCAACGGTTTCCGCCGCGACGCCCACCCGATGGCCGTCATGTGTGGCGTAGTCGGCGCCC
	20	GrazedPasture	plant	pasture grass-1	2019	ISL0419	CAATTCTGACCGGTACAGTGGGTCCGGACGTGATCGACGTACGCGGCCTGACCGCCACCGGCCGCTTCACATTTGACCCTGGTTTCATGTCCACGGCCTCTTGCGATTCGAAGATCACCTACATCGATGGTGATAATGGCATTCTGCTACACCGCGGCTACCCGATCGAACAACTGGCCGAGCAGTCCGACTATCTCGAAACCTGCTACCTGCTGCTCAACGGTGAACTGCCCACCGCCGAGCAGAAAGCCCAGTTCGTGGCCGTGGTCAAGAACCACACGATGGTTCACGAACAGCTCAAGACCTTTTTCAACGGTTTCCGCCGCGACGCCCACCCGATGGCCGTCATGTGTGGCGTAGTCGGCGCCC
	20	GrazedPasture	plant	pasture grass-1	2019	ISL0420	CAATTCTGACCGGTACAGTGGGTCCGGACGTGATCGACGTACGCGGCCTGACCGCCACCGGCCGCTTCACATTTGACCCTGGTTTCATGTCCACGGCCTCTTGCGATTCGAAGATCACCTACATCGATGGTGATAATGGCATTCTGCTACACCGCGGCTACCCGATCGAACAACTGGCCGAGCAGTCCGACTATCTCGAAACCTGCTACCTGCTGCTCAACGGTGAACTGCCCACCGCCGAGCAGAAAGCCCAGTTCGTGGCCGTGGTCAAGAACCACACGATGGTTCACGAACAGCTCAAGACCTTTTTCAACGGTTTCCGCCGCGACGCCCACCCGATGGCCGTCATGTGTGGCGTAGTCGGCGCCC
	20	GrazedPasture	plant	pasture grass-1	2019	ISL0421	CAATTCTGACCGGTACAGTGGGTCCGGACGTGATCGACGTACGCGGCCTGACCGCCACCGGCCGCTTCACATTTGACCCTGGTTTCATGTCCACGGCCTCTTGCGATTCGAAGATCACCTACATCGATGGTGATAATGGCATTCTGCTACACCGCGGCTACCCGATCGAACAACTGGCCGAGCAGTCCGACTATCTCGAAACCTGCTACCTGCTGCTCAACGGTGAACTGCCCACCGCCGAGCAGAAAGCCCAGTTCGTGGCCGTGGTCAAGAACCACACGATGGTTCACGAACAGCTCAAGACCTTTTTCAACGGTTTCCGCCGCGACGCCCACCCGATGGCCGTCATGTGTGGCGTAGTCGGCGCCC
	20	GrazedPasture	plant	pasture grass-1	2019	ISL0424	CAATTCTGACCGGTACAGTGGGTCCGGACGTGATCGACGTACGCGGCCTGACCGCCACCGGCCGCTTCACATTTGACCCTGGTTTCATGTCCACGGCCTCTTGCGATTCGAAGATCACCTACATCGATGGTGATAATGGCATTCTGCTACACCGCGGCTACCCGATCGAACAACTGGCCGAGCAGTCCGACTATCTCGAAACCTGCTACCTGCTGCTCAACGGTGAACTGCCCACCGCCGAGCAGAAAGCCCAGTTCGTGGCCGTGGTCAAGAACCACACGATGGTTCACGAACAGCTCAAGACCTTTTTCAACGGTTTCCGCCGCGACGCCCACCCGATGGCCGTCATGTGTGGCGTAGTCGGCGCCC
	20	GrazedPasture	plant	pasture grass-1	2019	ISL0428	CAATTCTGACCGGTACAGTGGGTCCGGACGTGATCGACGTACGCGGCCTGACCGCCACCGGCCGCTTCACATTTGACCCTGGTTTCATGTCCACGGCCTCTTGCGATTCGAAGATCACCTACATCGATGGTGATAATGGCATTCTGCTACACCGCGGCTACCCGATCGAACAACTGGCCGAGCAGTCCGACTATCTCGAAACCTGCTACCTGCTGCTCAACGGTGAACTGCCCACCGCCGAGCAGAAAGCCCAGTTCGTGGCCGTGGTCAAGAACCACACGATGGTTCACGAACAGCTCAAGACCTTTTTCAACGGTTTCCGCCGCGACGCCCACCCGATGGCCGTCATGTGTGGCGTAGTCGGCGCCC
	20	GrazedPasture	plant	pasture grass-1	2019	ISL0432	CAATTCTGACCGGTACAGTGGGTCCGGACGTGATCGACGTACGCGGCCTGACCGCCACCGGCCGCTTCACATTTGACCCTGGTTTCATGTCCACGGCCTCTTGCGATTCGAAGATCACCTACATCGATGGTGATAATGGCATTCTGCTACACCGCGGCTACCCGATCGAACAACTGGCCGAGCAGTCCGACTATCTCGAAACCTGCTACCTGCTGCTCAACGGTGAACTGCCCACCGCCGAGCAGAAAGCCCAGTTCGTGGCCGTGGTCAAGAACCACACGATGGTTCACGAACAGCTCAAGACCTTTTTCAACGGTTTCCGCCGCGACGCCCACCCGATGGCCGTCATGTGTGGCGTAGTCGGCGCCC
	20	GrazedPasture	plant	pasture grass-1	2019	ISL0433	CAATTCTGACCGGTACAGTGGGTCCGGACGTGATCGACGTACGCGGCCTGACCGCCACCGGCCGCTTCACATTTGACCCTGGTTTCATGTCCACGGCCTCTTGCGATTCGAAGATCACCTACATCGATGGTGATAATGGCATTCTGCTACACCGCGGCTACCCGATCGAACAACTGGCCGAGCAGTCCGACTATCTCGAAACCTGCTACCTGCTGCTCAACGGTGAACTGCCCACCGCCGAGCAGAAAGCCCAGTTCGTGGCCGTGGTCAAGAACCACACGATGGTTCACGAACAGCTCAAGACCTTTTTCAACGGTTTCCGCCGCGACGCCCACCCGATGGCCGTCATGTGTGGCGTAGTCGGCGCCC
	20	GrazedPasture	plant	pasture grass-1	2019	ISL0434	CAATTCTGACCGGTACAGTGGGTCCGGACGTGATCGACGTACGCGGCCTGACCGCCACCGGCCGCTTCACATTTGACCCTGGTTTCATGTCCACGGCCTCTTGCGATTCGAAGATCACCTACATCGATGGTGATAATGGCATTCTGCTACACCGCGGCTACCCGATCGAACAACTGGCCGAGCAGTCCGACTATCTCGAAACCTGCTACCTGCTGCTCAACGGTGAACTGCCCACCGCCGAGCAGAAAGCCCAGTTCGTGGCCGTGGTCAAGAACCACACGATGGTTCACGAACAGCTCAAGACCTTTTTCAACGGTTTCCGCCGCGACGCCCACCCGATGGCCGTCATGTGTGGCGTAGTCGGCGCCC
	20	GrazedPasture	plant	pasture grass-1	2019	ISL0438	CAATTCTGACCGGTACAGTGGGTCCGGACGTGATCGACGTACGCGGCCTGACCGCCACCGGCCGCTTCACATTTGACCCTGGTTTCATGTCCACGGCCTCTTGCGATTCGAAGATCACCTACATCGATGGTGATAATGGCATTCTGCTACACCGCGGCTACCCGATCGAACAACTGGCCGAGCAGTCCGACTATCTCGAAACCTGCTACCTGCTGCTCAACGGTGAACTGCCCACCGCCGAGCAGAAAGCCCAGTTCGTGGCCGTGGTCAAGAACCACACGATGGTTCACGAACAGCTCAAGACCTTTTTCAACGGTTTCCGCCGCGACGCCCACCCGATGGCCGTCATGTGTGGCGTAGTCGGCGCCC
	20	GrazedPasture	plant	pasture grass-1	2019	ISL0441	CAATTCTGACCGGTACAGTGGGTCCGGACGTGATCGACGTACGCGGCCTGACCGCCACCGGCCGCTTCACATTTGACCCTGGTTTCATGTCCACGGCCTCTTGCGATTCGAAGATCACCTACATCGATGGTGATAATGGCATTCTGCTACACCGCGGCTACCCGATCGAACAACTGGCCGAGCAGTCCGACTATCTCGAAACCTGCTACCTGCTGCTCAACGGTGAACTGCCCACCGCCGAGCAGAAAGCCCAGTTCGTGGCCGTGGTCAAGAACCACACGATGGTTCACGAACAGCTCAAGACCTTTTTCAACGGTTTCCGCCGCGACGCCCACCCGATGGCCGTCATGTGTGGCGTAGTCGGCGCCC
	20	GrazedPasture	plant	pasture grass-2	2019	ISL0444	CAATTCTGACCGGTACAGTGGGTCCGGACGTGATCGACGTACGCGGCCTGACCGCCACCGGCCGCTTCACATTTGACCCTGGTTTCATGTCCACGGCCTCTTGCGATTCGAAGATCACCTACATCGATGGTGATAATGGCATTCTGCTACACCGCGGCTACCCGATCGAACAACTGGCCGAGCAGTCCGACTATCTCGAAACCTGCTACCTGCTGCTCAACGGTGAACTGCCCACCGCCGAGCAGAAAGCCCAGTTCGTGGCCGTGGTCAAGAACCACACGATGGTTCACGAACAGCTCAAGACCTTTTTCAACGGTTTCCGCCGCGACGCCCACCCGATGGCCGTCATGTGTGGCGTAGTCGGCGCCC
	20	GrazedPasture	plant	pasture grass-2	2019	ISL0454	CAATTCTGACCGGTACAGTGGGTCCGGACGTGATCGACGTACGCGGCCTGACCGCCACCGGCCGCTTCACATTTGACCCTGGTTTCATGTCCACGGCCTCTTGCGATTCGAAGATCACCTACATCGATGGTGATAATGGCATTCTGCTACACCGCGGCTACCCGATCGAACAACTGGCCGAGCAGTCCGACTATCTCGAAACCTGCTACCTGCTGCTCAACGGTGAACTGCCCACCGCCGAGCAGAAAGCCCAGTTCGTGGCCGTGGTCAAGAACCACACGATGGTTCACGAACAGCTCAAGACCTTTTTCAACGGTTTCCGCCGCGACGCCCACCCGATGGCCGTCATGTGTGGCGTAGTCGGCGCCC
	21	forest	moss	Hylocomium splendens	2020	EG2022_04	CAATTCTGACCGGTACAGTGGGTCCGGACGTGATCGACGTACGCGGCCTGACCGCCACCGGCCGCTTCACATTTGACCCTGGTTTCATGTCCACGGCCTCTTGCGATTCGAAGATCACCTACATCGATGGTGATAATGGCATTCTGCTACACCGCGGCTACCCGATCGAACAACTGGCCGAGCAGTCCGACTATCTCGAAACCTGCTACCTGCTGCTCAACGGTGAACTGCCCACCGCCGAGCAGAAAGCCCAGTTCGTGGCCGTGGTCAAGAACCACACGATGGTTCACGAACAGCTCAAGACCTTTTTCAACTGTTTCCGCCGCGACGCCCACCCGATGGCCGTCATGTGTGGCGTAGTCGGCGCCC
	21	forest	moss	Hylocomium splendens	2020	EG2022_22	CAATTCTGACCGGTACAGTGGGTCCGGACGTGATCGACGTACGCGGCCTGACCGCCACCGGCCGCTTCACATTTGACCCTGGTTTCATGTCCACGGCCTCTTGCGATTCGAAGATCACCTACATCGATGGTGATAATGGCATTCTGCTACACCGCGGCTACCCGATCGAACAACTGGCCGAGCAGTCCGACTATCTCGAAACCTGCTACCTGCTGCTCAACGGTGAACTGCCCACCGCCGAGCAGAAAGCCCAGTTCGTGGCCGTGGTCAAGAACCACACGATGGTTCACGAACAGCTCAAGACCTTTTTCAACTGTTTCCGCCGCGACGCCCACCCGATGGCCGTCATGTGTGGCGTAGTCGGCGCCC
	21	forest	moss	Hylocomium splendens	2020	EG2022_24	CAATTCTGACCGGTACAGTGGGTCCGGACGTGATCGACGTACGCGGCCTGACCGCCACCGGCCGCTTCACATTTGACCCTGGTTTCATGTCCACGGCCTCTTGCGATTCGAAGATCACCTACATCGATGGTGATAATGGCATTCTGCTACACCGCGGCTACCCGATCGAACAACTGGCCGAGCAGTCCGACTATCTCGAAACCTGCTACCTGCTGCTCAACGGTGAACTGCCCACCGCCGAGCAGAAAGCCCAGTTCGTGGCCGTGGTCAAGAACCACACGATGGTTCACGAACAGCTCAAGACCTTTTTCAACTGTTTCCGCCGCGACGCCCACCCGATGGCCGTCATGTGTGGCGTAGTCGGCGCCC
	21	forest	moss	Hylocomium splendens	2020	EG2022_27	CAATTCTGACCGGTACAGTGGGTCCGGACGTGATCGACGTACGCGGCCTGACCGCCACCGGCCGCTTCACATTTGACCCTGGTTTCATGTCCACGGCCTCTTGCGATTCGAAGATCACCTACATCGATGGTGATAATGGCATTCTGCTACACCGCGGCTACCCGATCGAACAACTGGCCGAGCAGTCCGACTATCTCGAAACCTGCTACCTGCTGCTCAACGGTGAACTGCCCACCGCCGAGCAGAAAGCCCAGTTCGTGGCCGTGGTCAAGAACCACACGATGGTTCACGAACAGCTCAAGACCTTTTTCAACTGTTTCCGCCGCGACGCCCACCCGATGGCCGTCATGTGTGGCGTAGTCGGCGCCC
	21	forest	moss	Hylocomium splendens	2020	EG2022_30	CAATTCTGACCGGTACAGTGGGTCCGGACGTGATCGACGTACGCGGCCTGACCGCCACCGGCCGCTTCACATTTGACCCTGGTTTCATGTCCACGGCCTCTTGCGATTCGAAGATCACCTACATCGATGGTGATAATGGCATTCTGCTACACCGCGGCTACCCGATCGAACAACTGGCCGAGCAGTCCGACTATCTCGAAACCTGCTACCTGCTGCTCAACGGTGAACTGCCCACCGCCGAGCAGAAAGCCCAGTTCGTGGCCGTGGTCAAGAACCACACGATGGTTCACGAACAGCTCAAGACCTTTTTCAACTGTTTCCGCCGCGACGCCCACCCGATGGCCGTCATGTGTGGCGTAGTCGGCGCCC
	22	GrazedPasture	plant	pasture grass and clover	2018	ISL0401	CAATTCTGACCGGTACAGTGGGTCCGGACGTGATCGACGTACGCGGCCTGACCGCCACCGGCCGCTTCACATTTGACCCTGGTTTCATGTCCACGGCCTCTTGCGATTCGAAGATCACCTACATTGATGGTGATAATGGCATTCTGCTACACCGCGGCTACCCGATCGAACAACTGGCCGAGCAGTCCGACTATCTCGAAACCTGCTACCTGCTGCTCAACGGTGAACTGCCCACCGCCGAGCAGAAAGCCCAGTTCGTGGCCGTGGTCAAGAACCACACGATGGTTCACGAACAGCTCAAGACCTTTTTCAACGGTTTCCGCCGCGACGCCCACCCGATGGCCGTCATGTGTGGCGTAGTCGGCGCCC
	22	GrazedPasture	plant	pasture grass and clover	2018	ISL0402	CAATTCTGACCGGTACAGTGGGTCCGGACGTGATCGACGTACGCGGCCTGACCGCCACCGGCCGCTTCACATTTGACCCTGGTTTCATGTCCACGGCCTCTTGCGATTCGAAGATCACCTACATTGATGGTGATAATGGCATTCTGCTACACCGCGGCTACCCGATCGAACAACTGGCCGAGCAGTCCGACTATCTCGAAACCTGCTACCTGCTGCTCAACGGTGAACTGCCCACCGCCGAGCAGAAAGCCCAGTTCGTGGCCGTGGTCAAGAACCACACGATGGTTCACGAACAGCTCAAGACCTTTTTCAACGGTTTCCGCCGCGACGCCCACCCGATGGCCGTCATGTGTGGCGTAGTCGGCGCCC
	22	GrazedPasture	plant	pasture grass and clover	2018	ISL0414	CAATTCTGACCGGTACAGTGGGTCCGGACGTGATCGACGTACGCGGCCTGACCGCCACCGGCCGCTTCACATTTGACCCTGGTTTCATGTCCACGGCCTCTTGCGATTCGAAGATCACCTACATTGATGGTGATAATGGCATTCTGCTACACCGCGGCTACCCGATCGAACAACTGGCCGAGCAGTCCGACTATCTCGAAACCTGCTACCTGCTGCTCAACGGTGAACTGCCCACCGCCGAGCAGAAAGCCCAGTTCGTGGCCGTGGTCAAGAACCACACGATGGTTCACGAACAGCTCAAGACCTTTTTCAACGGTTTCCGCCGCGACGCCCACCCGATGGCCGTCATGTGTGGCGTAGTCGGCGCCC
	23	forest	plant	mixed grasses	2018	BR2003_07	CAATTCTGACCGGTACAGTGGGTCCGGACGTGATCGACGTACGCGGCCTGACCGCCACCGGCCGCTTCACATTTGACCCTGGTTTCATGTCCACGGCCTCTTGCGATTCGAAGATCACCTACATTGATGGTGATAATGGCATTCTGCTACACCGCGGCTACCCGATCGAACAACTGGCCGAGCAGTCCGACTATCTCGAAACCTGCTACCTGCTGCTCAACGGTGAACTGCCCACCGCCGAGCAGAAAGCCCAGTTCGTGGCCGTGGTCAAGAACCACACGATGGTTCACGAACAGCTCAAGACCTTTTTCAACGGCTTCCGCCGCGACGCCCACCCGATGGCCGTCATGTGTGGCGTAGTCGGCGCCC
	23	GrazedPasture	plant	farm grass_2	2018	ISL0040	CAATTCTGACCGGTACAGTGGGTCCGGACGTGATCGACGTACGCGGCCTGACCGCCACCGGCCGCTTCACATTTGACCCTGGTTTCATGTCCACGGCCTCTTGCGATTCGAAGATCACCTACATTGATGGTGATAATGGCATTCTGCTACACCGCGGCTACCCGATCGAACAACTGGCCGAGCAGTCCGACTATCTCGAAACCTGCTACCTGCTGCTCAACGGTGAACTGCCCACCGCCGAGCAGAAAGCCCAGTTCGTGGCCGTGGTCAAGAACCACACGATGGTTCACGAACAGCTCAAGACCTTTTTCAACGGCTTCCGCCGCGACGCCCACCCGATGGCCGTCATGTGTGGCGTAGTCGGCGCCC
	23	GrazedPasture	plant	farm grass_2	2018	ISL0044	CAATTCTGACCGGTACAGTGGGTCCGGACGTGATCGACGTACGCGGCCTGACCGCCACCGGCCGCTTCACATTTGACCCTGGTTTCATGTCCACGGCCTCTTGCGATTCGAAGATCACCTACATTGATGGTGATAATGGCATTCTGCTACACCGCGGCTACCCGATCGAACAACTGGCCGAGCAGTCCGACTATCTCGAAACCTGCTACCTGCTGCTCAACGGTGAACTGCCCACCGCCGAGCAGAAAGCCCAGTTCGTGGCCGTGGTCAAGAACCACACGATGGTTCACGAACAGCTCAAGACCTTTTTCAACGGCTTCCGCCGCGACGCCCACCCGATGGCCGTCATGTGTGGCGTAGTCGGCGCCC
	23	GrazedPasture	plant	farm grass_2	2018	ISL0052	CAATTCTGACCGGTACAGTGGGTCCGGACGTGATCGACGTACGCGGCCTGACCGCCACCGGCCGCTTCACATTTGACCCTGGTTTCATGTCCACGGCCTCTTGCGATTCGAAGATCACCTACATTGATGGTGATAATGGCATTCTGCTACACCGCGGCTACCCGATCGAACAACTGGCCGAGCAGTCCGACTATCTCGAAACCTGCTACCTGCTGCTCAACGGTGAACTGCCCACCGCCGAGCAGAAAGCCCAGTTCGTGGCCGTGGTCAAGAACCACACGATGGTTCACGAACAGCTCAAGACCTTTTTCAACGGCTTCCGCCGCGACGCCCACCCGATGGCCGTCATGTGTGGCGTAGTCGGCGCCC
	23	GrazedPasture	plant	pasture grass and clover	2019	ISL0412	CAATTCTGACCGGTACAGTGGGTCCGGACGTGATCGACGTACGCGGCCTGACCGCCACCGGCCGCTTCACATTTGACCCTGGTTTCATGTCCACGGCCTCTTGCGATTCGAAGATCACCTACATTGATGGTGATAATGGCATTCTGCTACACCGCGGCTACCCGATCGAACAACTGGCCGAGCAGTCCGACTATCTCGAAACCTGCTACCTGCTGCTCAACGGTGAACTGCCCACCGCCGAGCAGAAAGCCCAGTTCGTGGCCGTGGTCAAGAACCACACGATGGTTCACGAACAGCTCAAGACCTTTTTCAACGGCTTCCGCCGCGACGCCCACCCGATGGCCGTCATGTGTGGCGTAGTCGGCGCCC
	23	GrazedPasture	plant	pasture grass-1	2019	ISL0437	CAATTCTGACCGGTACAGTGGGTCCGGACGTGATCGACGTACGCGGCCTGACCGCCACCGGCCGCTTCACATTTGACCCTGGTTTCATGTCCACGGCCTCTTGCGATTCGAAGATCACCTACATTGATGGTGATAATGGCATTCTGCTACACCGCGGCTACCCGATCGAACAACTGGCCGAGCAGTCCGACTATCTCGAAACCTGCTACCTGCTGCTCAACGGTGAACTGCCCACCGCCGAGCAGAAAGCCCAGTTCGTGGCCGTGGTCAAGAACCACACGATGGTTCACGAACAGCTCAAGACCTTTTTCAACGGCTTCCGCCGCGACGCCCACCCGATGGCCGTCATGTGTGGCGTAGTCGGCGCCC
	23	GrazedPasture	plant	pasture grass-2	2019	ISL0445	CAATTCTGACCGGTACAGTGGGTCCGGACGTGATCGACGTACGCGGCCTGACCGCCACCGGCCGCTTCACATTTGACCCTGGTTTCATGTCCACGGCCTCTTGCGATTCGAAGATCACCTACATTGATGGTGATAATGGCATTCTGCTACACCGCGGCTACCCGATCGAACAACTGGCCGAGCAGTCCGACTATCTCGAAACCTGCTACCTGCTGCTCAACGGTGAACTGCCCACCGCCGAGCAGAAAGCCCAGTTCGTGGCCGTGGTCAAGAACCACACGATGGTTCACGAACAGCTCAAGACCTTTTTCAACGGCTTCCGCCGCGACGCCCACCCGATGGCCGTCATGTGTGGCGTAGTCGGCGCCC
	23	GrazedPasture	plant	pasture grass-2	2019	ISL0446	CAATTCTGACCGGTACAGTGGGTCCGGACGTGATCGACGTACGCGGCCTGACCGCCACCGGCCGCTTCACATTTGACCCTGGTTTCATGTCCACGGCCTCTTGCGATTCGAAGATCACCTACATTGATGGTGATAATGGCATTCTGCTACACCGCGGCTACCCGATCGAACAACTGGCCGAGCAGTCCGACTATCTCGAAACCTGCTACCTGCTGCTCAACGGTGAACTGCCCACCGCCGAGCAGAAAGCCCAGTTCGTGGCCGTGGTCAAGAACCACACGATGGTTCACGAACAGCTCAAGACCTTTTTCAACGGCTTCCGCCGCGACGCCCACCCGATGGCCGTCATGTGTGGCGTAGTCGGCGCCC
	23	GrazedPasture	plant	pasture grass-2	2019	ISL0447	CAATTCTGACCGGTACAGTGGGTCCGGACGTGATCGACGTACGCGGCCTGACCGCCACCGGCCGCTTCACATTTGACCCTGGTTTCATGTCCACGGCCTCTTGCGATTCGAAGATCACCTACATTGATGGTGATAATGGCATTCTGCTACACCGCGGCTACCCGATCGAACAACTGGCCGAGCAGTCCGACTATCTCGAAACCTGCTACCTGCTGCTCAACGGTGAACTGCCCACCGCCGAGCAGAAAGCCCAGTTCGTGGCCGTGGTCAAGAACCACACGATGGTTCACGAACAGCTCAAGACCTTTTTCAACGGCTTCCGCCGCGACGCCCACCCGATGGCCGTCATGTGTGGCGTAGTCGGCGCCC
	23	GrazedPasture	plant	pasture grass-2	2019	ISL0449	CAATTCTGACCGGTACAGTGGGTCCGGACGTGATCGACGTACGCGGCCTGACCGCCACCGGCCGCTTCACATTTGACCCTGGTTTCATGTCCACGGCCTCTTGCGATTCGAAGATCACCTACATTGATGGTGATAATGGCATTCTGCTACACCGCGGCTACCCGATCGAACAACTGGCCGAGCAGTCCGACTATCTCGAAACCTGCTACCTGCTGCTCAACGGTGAACTGCCCACCGCCGAGCAGAAAGCCCAGTTCGTGGCCGTGGTCAAGAACCACACGATGGTTCACGAACAGCTCAAGACCTTTTTCAACGGCTTCCGCCGCGACGCCCACCCGATGGCCGTCATGTGTGGCGTAGTCGGCGCCC
	23	GrazedPasture	plant	pasture grass-2	2019	ISL0451	CAATTCTGACCGGTACAGTGGGTCCGGACGTGATCGACGTACGCGGCCTGACCGCCACCGGCCGCTTCACATTTGACCCTGGTTTCATGTCCACGGCCTCTTGCGATTCGAAGATCACCTACATTGATGGTGATAATGGCATTCTGCTACACCGCGGCTACCCGATCGAACAACTGGCCGAGCAGTCCGACTATCTCGAAACCTGCTACCTGCTGCTCAACGGTGAACTGCCCACCGCCGAGCAGAAAGCCCAGTTCGTGGCCGTGGTCAAGAACCACACGATGGTTCACGAACAGCTCAAGACCTTTTTCAACGGCTTCCGCCGCGACGCCCACCCGATGGCCGTCATGTGTGGCGTAGTCGGCGCCC
	23	GrazedPasture	plant	pasture grass-2	2019	ISL0456	CAATTCTGACCGGTACAGTGGGTCCGGACGTGATCGACGTACGCGGCCTGACCGCCACCGGCCGCTTCACATTTGACCCTGGTTTCATGTCCACGGCCTCTTGCGATTCGAAGATCACCTACATTGATGGTGATAATGGCATTCTGCTACACCGCGGCTACCCGATCGAACAACTGGCCGAGCAGTCCGACTATCTCGAAACCTGCTACCTGCTGCTCAACGGTGAACTGCCCACCGCCGAGCAGAAAGCCCAGTTCGTGGCCGTGGTCAAGAACCACACGATGGTTCACGAACAGCTCAAGACCTTTTTCAACGGCTTCCGCCGCGACGCCCACCCGATGGCCGTCATGTGTGGCGTAGTCGGCGCCC
	23	GrazedPasture	plant	pasture grass-2	2019	ISL0457	CAATTCTGACCGGTACAGTGGGTCCGGACGTGATCGACGTACGCGGCCTGACCGCCACCGGCCGCTTCACATTTGACCCTGGTTTCATGTCCACGGCCTCTTGCGATTCGAAGATCACCTACATTGATGGTGATAATGGCATTCTGCTACACCGCGGCTACCCGATCGAACAACTGGCCGAGCAGTCCGACTATCTCGAAACCTGCTACCTGCTGCTCAACGGTGAACTGCCCACCGCCGAGCAGAAAGCCCAGTTCGTGGCCGTGGTCAAGAACCACACGATGGTTCACGAACAGCTCAAGACCTTTTTCAACGGCTTCCGCCGCGACGCCCACCCGATGGCCGTCATGTGTGGCGTAGTCGGCGCCC
	23	GrazedPasture	plant	pasture grass-2	2019	ISL0458	CAATTCTGACCGGTACAGTGGGTCCGGACGTGATCGACGTACGCGGCCTGACCGCCACCGGCCGCTTCACATTTGACCCTGGTTTCATGTCCACGGCCTCTTGCGATTCGAAGATCACCTACATTGATGGTGATAATGGCATTCTGCTACACCGCGGCTACCCGATCGAACAACTGGCCGAGCAGTCCGACTATCTCGAAACCTGCTACCTGCTGCTCAACGGTGAACTGCCCACCGCCGAGCAGAAAGCCCAGTTCGTGGCCGTGGTCAAGAACCACACGATGGTTCACGAACAGCTCAAGACCTTTTTCAACGGCTTCCGCCGCGACGCCCACCCGATGGCCGTCATGTGTGGCGTAGTCGGCGCCC
	24	GrazedPasture	plant	pasture grass and clover	2019	ISL0403	CAATTCTGACCGGTACAGTGGGTCCGGACGTGATCGACGTACGCGGCCTGACCGCCACCGGCCGCTTCACATTTGACCCTGGTTTCATGTCCACGGCCTCTTGCGATTCGAAGATCACCTACATTGATGGTGATAATGGCATTCTGCTACACCGCGGCTACCCGATCGAACAACTGGCCGAGCAGTCTGACTATCTCGAAACCTGCTACCTGCTGCTCAACGGTGAACTGCCCACCGCCGAGCAGAAAGCCCAGTTCGTGGCCGTGGTCAAGAACCACACGATGGTTCACGAACAGCTCAAGACCTTTTTCAACGGCTTCCGCCGCGACGCCCACCCGATGGCCGTCATGTGTGGCGTAGTCGGCGCCC
	24	GrazedPasture	plant	pasture grass and clover	2019	ISL0410	CAATTCTGACCGGTACAGTGGGTCCGGACGTGATCGACGTACGCGGCCTGACCGCCACCGGCCGCTTCACATTTGACCCTGGTTTCATGTCCACGGCCTCTTGCGATTCGAAGATCACCTACATTGATGGTGATAATGGCATTCTGCTACACCGCGGCTACCCGATCGAACAACTGGCCGAGCAGTCTGACTATCTCGAAACCTGCTACCTGCTGCTCAACGGTGAACTGCCCACCGCCGAGCAGAAAGCCCAGTTCGTGGCCGTGGTCAAGAACCACACGATGGTTCACGAACAGCTCAAGACCTTTTTCAACGGCTTCCGCCGCGACGCCCACCCGATGGCCGTCATGTGTGGCGTAGTCGGCGCCC
	24	GrazedPasture	plant	pasture grass and clover	2019	ISL0415	CAATTCTGACCGGTACAGTGGGTCCGGACGTGATCGACGTACGCGGCCTGACCGCCACCGGCCGCTTCACATTTGACCCTGGTTTCATGTCCACGGCCTCTTGCGATTCGAAGATCACCTACATTGATGGTGATAATGGCATTCTGCTACACCGCGGCTACCCGATCGAACAACTGGCCGAGCAGTCTGACTATCTCGAAACCTGCTACCTGCTGCTCAACGGTGAACTGCCCACCGCCGAGCAGAAAGCCCAGTTCGTGGCCGTGGTCAAGAACCACACGATGGTTCACGAACAGCTCAAGACCTTTTTCAACGGCTTCCGCCGCGACGCCCACCCGATGGCCGTCATGTGTGGCGTAGTCGGCGCCC
	24	GrazedPasture	plant	pasture grass and clover	2019	ISL0418	CAATTCTGACCGGTACAGTGGGTCCGGACGTGATCGACGTACGCGGCCTGACCGCCACCGGCCGCTTCACATTTGACCCTGGTTTCATGTCCACGGCCTCTTGCGATTCGAAGATCACCTACATTGATGGTGATAATGGCATTCTGCTACACCGCGGCTACCCGATCGAACAACTGGCCGAGCAGTCTGACTATCTCGAAACCTGCTACCTGCTGCTCAACGGTGAACTGCCCACCGCCGAGCAGAAAGCCCAGTTCGTGGCCGTGGTCAAGAACCACACGATGGTTCACGAACAGCTCAAGACCTTTTTCAACGGCTTCCGCCGCGACGCCCACCCGATGGCCGTCATGTGTGGCGTAGTCGGCGCCC
	24	GrazedPasture	plant	pasture grass-1	2019	ISL0423	CAATTCTGACCGGTACAGTGGGTCCGGACGTGATCGACGTACGCGGCCTGACCGCCACCGGCCGCTTCACATTTGACCCTGGTTTCATGTCCACGGCCTCTTGCGATTCGAAGATCACCTACATTGATGGTGATAATGGCATTCTGCTACACCGCGGCTACCCGATCGAACAACTGGCCGAGCAGTCTGACTATCTCGAAACCTGCTACCTGCTGCTCAACGGTGAACTGCCCACCGCCGAGCAGAAAGCCCAGTTCGTGGCCGTGGTCAAGAACCACACGATGGTTCACGAACAGCTCAAGACCTTTTTCAACGGCTTCCGCCGCGACGCCCACCCGATGGCCGTCATGTGTGGCGTAGTCGGCGCCC
	24	GrazedPasture	plant	pasture grass-1	2019	ISL0425	CAATTCTGACCGGTACAGTGGGTCCGGACGTGATCGACGTACGCGGCCTGACCGCCACCGGCCGCTTCACATTTGACCCTGGTTTCATGTCCACGGCCTCTTGCGATTCGAAGATCACCTACATTGATGGTGATAATGGCATTCTGCTACACCGCGGCTACCCGATCGAACAACTGGCCGAGCAGTCTGACTATCTCGAAACCTGCTACCTGCTGCTCAACGGTGAACTGCCCACCGCCGAGCAGAAAGCCCAGTTCGTGGCCGTGGTCAAGAACCACACGATGGTTCACGAACAGCTCAAGACCTTTTTCAACGGCTTCCGCCGCGACGCCCACCCGATGGCCGTCATGTGTGGCGTAGTCGGCGCCC
	24	GrazedPasture	plant	pasture grass-1	2019	ISL0426	CAATTCTGACCGGTACAGTGGGTCCGGACGTGATCGACGTACGCGGCCTGACCGCCACCGGCCGCTTCACATTTGACCCTGGTTTCATGTCCACGGCCTCTTGCGATTCGAAGATCACCTACATTGATGGTGATAATGGCATTCTGCTACACCGCGGCTACCCGATCGAACAACTGGCCGAGCAGTCTGACTATCTCGAAACCTGCTACCTGCTGCTCAACGGTGAACTGCCCACCGCCGAGCAGAAAGCCCAGTTCGTGGCCGTGGTCAAGAACCACACGATGGTTCACGAACAGCTCAAGACCTTTTTCAACGGCTTCCGCCGCGACGCCCACCCGATGGCCGTCATGTGTGGCGTAGTCGGCGCCC
	24	GrazedPasture	plant	pasture grass-1	2019	ISL0431	CAATTCTGACCGGTACAGTGGGTCCGGACGTGATCGACGTACGCGGCCTGACCGCCACCGGCCGCTTCACATTTGACCCTGGTTTCATGTCCACGGCCTCTTGCGATTCGAAGATCACCTACATTGATGGTGATAATGGCATTCTGCTACACCGCGGCTACCCGATCGAACAACTGGCCGAGCAGTCTGACTATCTCGAAACCTGCTACCTGCTGCTCAACGGTGAACTGCCCACCGCCGAGCAGAAAGCCCAGTTCGTGGCCGTGGTCAAGAACCACACGATGGTTCACGAACAGCTCAAGACCTTTTTCAACGGCTTCCGCCGCGACGCCCACCCGATGGCCGTCATGTGTGGCGTAGTCGGCGCCC
	24	GrazedPasture	plant	pasture grass-1	2019	ISL0435	CAATTCTGACCGGTACAGTGGGTCCGGACGTGATCGACGTACGCGGCCTGACCGCCACCGGCCGCTTCACATTTGACCCTGGTTTCATGTCCACGGCCTCTTGCGATTCGAAGATCACCTACATTGATGGTGATAATGGCATTCTGCTACACCGCGGCTACCCGATCGAACAACTGGCCGAGCAGTCTGACTATCTCGAAACCTGCTACCTGCTGCTCAACGGTGAACTGCCCACCGCCGAGCAGAAAGCCCAGTTCGTGGCCGTGGTCAAGAACCACACGATGGTTCACGAACAGCTCAAGACCTTTTTCAACGGCTTCCGCCGCGACGCCCACCCGATGGCCGTCATGTGTGGCGTAGTCGGCGCCC
	24	GrazedPasture	plant	pasture grass-1	2019	ISL0436	CAATTCTGACCGGTACAGTGGGTCCGGACGTGATCGACGTACGCGGCCTGACCGCCACCGGCCGCTTCACATTTGACCCTGGTTTCATGTCCACGGCCTCTTGCGATTCGAAGATCACCTACATTGATGGTGATAATGGCATTCTGCTACACCGCGGCTACCCGATCGAACAACTGGCCGAGCAGTCTGACTATCTCGAAACCTGCTACCTGCTGCTCAACGGTGAACTGCCCACCGCCGAGCAGAAAGCCCAGTTCGTGGCCGTGGTCAAGAACCACACGATGGTTCACGAACAGCTCAAGACCTTTTTCAACGGCTTCCGCCGCGACGCCCACCCGATGGCCGTCATGTGTGGCGTAGTCGGCGCCC
	24	GrazedPasture	plant	pasture grass-1	2019	ISL0440	CAATTCTGACCGGTACAGTGGGTCCGGACGTGATCGACGTACGCGGCCTGACCGCCACCGGCCGCTTCACATTTGACCCTGGTTTCATGTCCACGGCCTCTTGCGATTCGAAGATCACCTACATTGATGGTGATAATGGCATTCTGCTACACCGCGGCTACCCGATCGAACAACTGGCCGAGCAGTCTGACTATCTCGAAACCTGCTACCTGCTGCTCAACGGTGAACTGCCCACCGCCGAGCAGAAAGCCCAGTTCGTGGCCGTGGTCAAGAACCACACGATGGTTCACGAACAGCTCAAGACCTTTTTCAACGGCTTCCGCCGCGACGCCCACCCGATGGCCGTCATGTGTGGCGTAGTCGGCGCCC
	25	GrazedPasture	plant	farm grass_2	2019	ISL0050	CAATTCTGACCGGTACAGTGGGTCCGGACGTGATCGACGTACGCGGCCTGACCGCCACCGGCCGCTTCACATTTGACCCTGGCTTCATGTCCACGGCCTCTTGCGATTCGAAGATCACCTACATCGATGGTGACAATGGCATTCTGCTACACCGCGGCTACCCGATCGAACAACTGGCCGAGCAGTCCGACTACCTGGAAACCTGCTACCTGCTGCTCAACGGTGAACTGCCCACCGCCGAGCAGAAAGCCCAGTTCGTTGCCGTGGTCAAGAACCACACGATGGTTCACGAACAGCTCAAGACCTTTTTCAACGGTTTCCGCCGTGACGCCCACCCGATGGCCGTCATGTGTGGTGTAGTCGGCGCCC
	25	GrazedPasture	plant	farm grass_2	2019	ISL0051	CAATTCTGACCGGTACAGTGGGTCCGGACGTGATCGACGTACGCGGCCTGACCGCCACCGGCCGCTTCACATTTGACCCTGGCTTCATGTCCACGGCCTCTTGCGATTCGAAGATCACCTACATCGATGGTGACAATGGCATTCTGCTACACCGCGGCTACCCGATCGAACAACTGGCCGAGCAGTCCGACTACCTGGAAACCTGCTACCTGCTGCTCAACGGTGAACTGCCCACCGCCGAGCAGAAAGCCCAGTTCGTTGCCGTGGTCAAGAACCACACGATGGTTCACGAACAGCTCAAGACCTTTTTCAACGGTTTCCGCCGTGACGCCCACCCGATGGCCGTCATGTGTGGTGTAGTCGGCGCCC
	26	GrazedPasture	plant	pasture grass and clover	2019	ISL0400	CAATTCTGACCGGTACAGTGGGTCCGGACGTGATCGACGTACGCGGCCTGACCGCCACCGGCCGCTTCACATTTGACCCTGGCTTCATGTCCACGGCCTCTTGCGATTCGAAGATCACCTACATCGATGGTGATAATGGCATTCTGCTGCACCGCGGCTACCCGATCGAACAACTGGCCGAGCAGTCCGACTACCTGGAAACCTGCTACCTGCTGCTCAACGGTGAACTGCCCACCGCCGAGCAGAAAGCCCAGTTCGTGGCCGTGGTCAAGAACCACACGATGGTTCACGAACAGCTCAAGACCTTTTTCAACGGTTTCCGCCGTGACGCCCACCCGATGGCCGTCATGTGTGGTGTAGTCGGCGCCC
	26	GrazedPasture	plant	pasture grass and clover	2019	ISL0408	CAATTCTGACCGGTACAGTGGGTCCGGACGTGATCGACGTACGCGGCCTGACCGCCACCGGCCGCTTCACATTTGACCCTGGCTTCATGTCCACGGCCTCTTGCGATTCGAAGATCACCTACATCGATGGTGATAATGGCATTCTGCTGCACCGCGGCTACCCGATCGAACAACTGGCCGAGCAGTCCGACTACCTGGAAACCTGCTACCTGCTGCTCAACGGTGAACTGCCCACCGCCGAGCAGAAAGCCCAGTTCGTGGCCGTGGTCAAGAACCACACGATGGTTCACGAACAGCTCAAGACCTTTTTCAACGGTTTCCGCCGTGACGCCCACCCGATGGCCGTCATGTGTGGTGTAGTCGGCGCCC
	26	GrazedPasture	plant	pasture grass and clover	2019	ISL0413	CAATTCTGACCGGTACAGTGGGTCCGGACGTGATCGACGTACGCGGCCTGACCGCCACCGGCCGCTTCACATTTGACCCTGGCTTCATGTCCACGGCCTCTTGCGATTCGAAGATCACCTACATCGATGGTGATAATGGCATTCTGCTGCACCGCGGCTACCCGATCGAACAACTGGCCGAGCAGTCCGACTACCTGGAAACCTGCTACCTGCTGCTCAACGGTGAACTGCCCACCGCCGAGCAGAAAGCCCAGTTCGTGGCCGTGGTCAAGAACCACACGATGGTTCACGAACAGCTCAAGACCTTTTTCAACGGTTTCCGCCGTGACGCCCACCCGATGGCCGTCATGTGTGGTGTAGTCGGCGCCC
	27	OroborealAlpineGlacier	moss	moss from mixed stand - location_1	2018	ISL0140	CAATACTGACCGGTACAGTGGGTCCGGACGTGATCGACGTACGCGGTCTGACCGCCACCGGCCGCTTCACATTTGACCCTGGTTTCATGTCCACGGCCTCTTGCGAGTCGAAGATCACCTACATTGATGGTGACAACGGAATTCTGCTGCACCGCGGCTACCCGATCGAACAACTGGCCGAGCAGTCCGATTACCTCGAGACCTGCTACCTGTTGCTCAACGGCGAGCTGCCAACCGCCGAACAGAAAGCCCAGTTCGTGGCCGTGGTCAAGAACCACACGATGGTTCACGAACAACTCAAGACATTCTTCAACGGCTTTCGCCGTGACGCCCACCCGATGGCCGTCATGTGCGGTGTAGTCGGCGCCC
	27	OroborealAlpineGlacier	moss	moss from mixed stand - location_1	2018	ISL0141	CAATACTGACCGGTACAGTGGGTCCGGACGTGATCGACGTACGCGGTCTGACCGCCACCGGCCGCTTCACATTTGACCCTGGTTTCATGTCCACGGCCTCTTGCGAGTCGAAGATCACCTACATTGATGGTGACAACGGAATTCTGCTGCACCGCGGCTACCCGATCGAACAACTGGCCGAGCAGTCCGATTACCTCGAGACCTGCTACCTGTTGCTCAACGGCGAGCTGCCAACCGCCGAACAGAAAGCCCAGTTCGTGGCCGTGGTCAAGAACCACACGATGGTTCACGAACAACTCAAGACATTCTTCAACGGCTTTCGCCGTGACGCCCACCCGATGGCCGTCATGTGCGGTGTAGTCGGCGCCC
	27	OroborealAlpineGlacier	moss	moss from mixed stand - location_1	2018	ISL0142	CAATACTGACCGGTACAGTGGGTCCGGACGTGATCGACGTACGCGGTCTGACCGCCACCGGCCGCTTCACATTTGACCCTGGTTTCATGTCCACGGCCTCTTGCGAGTCGAAGATCACCTACATTGATGGTGACAACGGAATTCTGCTGCACCGCGGCTACCCGATCGAACAACTGGCCGAGCAGTCCGATTACCTCGAGACCTGCTACCTGTTGCTCAACGGCGAGCTGCCAACCGCCGAACAGAAAGCCCAGTTCGTGGCCGTGGTCAAGAACCACACGATGGTTCACGAACAACTCAAGACATTCTTCAACGGCTTTCGCCGTGACGCCCACCCGATGGCCGTCATGTGCGGTGTAGTCGGCGCCC
	27	OroborealAlpineGlacier	moss	moss from mixed stand - location_1	2018	ISL0144	CAATACTGACCGGTACAGTGGGTCCGGACGTGATCGACGTACGCGGTCTGACCGCCACCGGCCGCTTCACATTTGACCCTGGTTTCATGTCCACGGCCTCTTGCGAGTCGAAGATCACCTACATTGATGGTGACAACGGAATTCTGCTGCACCGCGGCTACCCGATCGAACAACTGGCCGAGCAGTCCGATTACCTCGAGACCTGCTACCTGTTGCTCAACGGCGAGCTGCCAACCGCCGAACAGAAAGCCCAGTTCGTGGCCGTGGTCAAGAACCACACGATGGTTCACGAACAACTCAAGACATTCTTCAACGGCTTTCGCCGTGACGCCCACCCGATGGCCGTCATGTGCGGTGTAGTCGGCGCCC
	27	OroborealAlpineGlacier	moss	moss from mixed stand - location_1	2018	ISL0145	CAATACTGACCGGTACAGTGGGTCCGGACGTGATCGACGTACGCGGTCTGACCGCCACCGGCCGCTTCACATTTGACCCTGGTTTCATGTCCACGGCCTCTTGCGAGTCGAAGATCACCTACATTGATGGTGACAACGGAATTCTGCTGCACCGCGGCTACCCGATCGAACAACTGGCCGAGCAGTCCGATTACCTCGAGACCTGCTACCTGTTGCTCAACGGCGAGCTGCCAACCGCCGAACAGAAAGCCCAGTTCGTGGCCGTGGTCAAGAACCACACGATGGTTCACGAACAACTCAAGACATTCTTCAACGGCTTTCGCCGTGACGCCCACCCGATGGCCGTCATGTGCGGTGTAGTCGGCGCCC
	27	OroborealAlpineGlacier	moss	moss from mixed stand - location_1	2018	ISL0148	CAATACTGACCGGTACAGTGGGTCCGGACGTGATCGACGTACGCGGTCTGACCGCCACCGGCCGCTTCACATTTGACCCTGGTTTCATGTCCACGGCCTCTTGCGAGTCGAAGATCACCTACATTGATGGTGACAACGGAATTCTGCTGCACCGCGGCTACCCGATCGAACAACTGGCCGAGCAGTCCGATTACCTCGAGACCTGCTACCTGTTGCTCAACGGCGAGCTGCCAACCGCCGAACAGAAAGCCCAGTTCGTGGCCGTGGTCAAGAACCACACGATGGTTCACGAACAACTCAAGACATTCTTCAACGGCTTTCGCCGTGACGCCCACCCGATGGCCGTCATGTGCGGTGTAGTCGGCGCCC
	27	OroborealAlpineGlacier	moss	moss from mixed stand - location_1	2018	ISL0149	CAATACTGACCGGTACAGTGGGTCCGGACGTGATCGACGTACGCGGTCTGACCGCCACCGGCCGCTTCACATTTGACCCTGGTTTCATGTCCACGGCCTCTTGCGAGTCGAAGATCACCTACATTGATGGTGACAACGGAATTCTGCTGCACCGCGGCTACCCGATCGAACAACTGGCCGAGCAGTCCGATTACCTCGAGACCTGCTACCTGTTGCTCAACGGCGAGCTGCCAACCGCCGAACAGAAAGCCCAGTTCGTGGCCGTGGTCAAGAACCACACGATGGTTCACGAACAACTCAAGACATTCTTCAACGGCTTTCGCCGTGACGCCCACCCGATGGCCGTCATGTGCGGTGTAGTCGGCGCCC
	27	OroborealAlpineGlacier	moss	moss from mixed stand - location_1	2018	ISL0150	CAATACTGACCGGTACAGTGGGTCCGGACGTGATCGACGTACGCGGTCTGACCGCCACCGGCCGCTTCACATTTGACCCTGGTTTCATGTCCACGGCCTCTTGCGAGTCGAAGATCACCTACATTGATGGTGACAACGGAATTCTGCTGCACCGCGGCTACCCGATCGAACAACTGGCCGAGCAGTCCGATTACCTCGAGACCTGCTACCTGTTGCTCAACGGCGAGCTGCCAACCGCCGAACAGAAAGCCCAGTTCGTGGCCGTGGTCAAGAACCACACGATGGTTCACGAACAACTCAAGACATTCTTCAACGGCTTTCGCCGTGACGCCCACCCGATGGCCGTCATGTGCGGTGTAGTCGGCGCCC
	27	OroborealAlpineGlacier	moss	moss from mixed stand - location_1	2018	ISL0151	CAATACTGACCGGTACAGTGGGTCCGGACGTGATCGACGTACGCGGTCTGACCGCCACCGGCCGCTTCACATTTGACCCTGGTTTCATGTCCACGGCCTCTTGCGAGTCGAAGATCACCTACATTGATGGTGACAACGGAATTCTGCTGCACCGCGGCTACCCGATCGAACAACTGGCCGAGCAGTCCGATTACCTCGAGACCTGCTACCTGTTGCTCAACGGCGAGCTGCCAACCGCCGAACAGAAAGCCCAGTTCGTGGCCGTGGTCAAGAACCACACGATGGTTCACGAACAACTCAAGACATTCTTCAACGGCTTTCGCCGTGACGCCCACCCGATGGCCGTCATGTGCGGTGTAGTCGGCGCCC
	27	OroborealAlpineGlacier	moss	moss from mixed stand - location_1	2018	ISL0155	CAATACTGACCGGTACAGTGGGTCCGGACGTGATCGACGTACGCGGTCTGACCGCCACCGGCCGCTTCACATTTGACCCTGGTTTCATGTCCACGGCCTCTTGCGAGTCGAAGATCACCTACATTGATGGTGACAACGGAATTCTGCTGCACCGCGGCTACCCGATCGAACAACTGGCCGAGCAGTCCGATTACCTCGAGACCTGCTACCTGTTGCTCAACGGCGAGCTGCCAACCGCCGAACAGAAAGCCCAGTTCGTGGCCGTGGTCAAGAACCACACGATGGTTCACGAACAACTCAAGACATTCTTCAACGGCTTTCGCCGTGACGCCCACCCGATGGCCGTCATGTGCGGTGTAGTCGGCGCCC
	27	OroborealAlpineGlacier	moss	moss from mixed stand - location_1	2018	ISL0156	CAATACTGACCGGTACAGTGGGTCCGGACGTGATCGACGTACGCGGTCTGACCGCCACCGGCCGCTTCACATTTGACCCTGGTTTCATGTCCACGGCCTCTTGCGAGTCGAAGATCACCTACATTGATGGTGACAACGGAATTCTGCTGCACCGCGGCTACCCGATCGAACAACTGGCCGAGCAGTCCGATTACCTCGAGACCTGCTACCTGTTGCTCAACGGCGAGCTGCCAACCGCCGAACAGAAAGCCCAGTTCGTGGCCGTGGTCAAGAACCACACGATGGTTCACGAACAACTCAAGACATTCTTCAACGGCTTTCGCCGTGACGCCCACCCGATGGCCGTCATGTGCGGTGTAGTCGGCGCCC
	27	OroborealAlpineGlacier	moss	moss from mixed stand - location_1	2018	ISL0157	CAATACTGACCGGTACAGTGGGTCCGGACGTGATCGACGTACGCGGTCTGACCGCCACCGGCCGCTTCACATTTGACCCTGGTTTCATGTCCACGGCCTCTTGCGAGTCGAAGATCACCTACATTGATGGTGACAACGGAATTCTGCTGCACCGCGGCTACCCGATCGAACAACTGGCCGAGCAGTCCGATTACCTCGAGACCTGCTACCTGTTGCTCAACGGCGAGCTGCCAACCGCCGAACAGAAAGCCCAGTTCGTGGCCGTGGTCAAGAACCACACGATGGTTCACGAACAACTCAAGACATTCTTCAACGGCTTTCGCCGTGACGCCCACCCGATGGCCGTCATGTGCGGTGTAGTCGGCGCCC
	27	OroborealAlpineGlacier	moss	moss from mixed stand - location_1	2018	ISL0158	CAATACTGACCGGTACAGTGGGTCCGGACGTGATCGACGTACGCGGTCTGACCGCCACCGGCCGCTTCACATTTGACCCTGGTTTCATGTCCACGGCCTCTTGCGAGTCGAAGATCACCTACATTGATGGTGACAACGGAATTCTGCTGCACCGCGGCTACCCGATCGAACAACTGGCCGAGCAGTCCGATTACCTCGAGACCTGCTACCTGTTGCTCAACGGCGAGCTGCCAACCGCCGAACAGAAAGCCCAGTTCGTGGCCGTGGTCAAGAACCACACGATGGTTCACGAACAACTCAAGACATTCTTCAACGGCTTTCGCCGTGACGCCCACCCGATGGCCGTCATGTGCGGTGTAGTCGGCGCCC
	27	OroborealAlpineGlacier	moss	moss from mixed stand - location_1	2018	ISL0161	CAATACTGACCGGTACAGTGGGTCCGGACGTGATCGACGTACGCGGTCTGACCGCCACCGGCCGCTTCACATTTGACCCTGGTTTCATGTCCACGGCCTCTTGCGAGTCGAAGATCACCTACATTGATGGTGACAACGGAATTCTGCTGCACCGCGGCTACCCGATCGAACAACTGGCCGAGCAGTCCGATTACCTCGAGACCTGCTACCTGTTGCTCAACGGCGAGCTGCCAACCGCCGAACAGAAAGCCCAGTTCGTGGCCGTGGTCAAGAACCACACGATGGTTCACGAACAACTCAAGACATTCTTCAACGGCTTTCGCCGTGACGCCCACCCGATGGCCGTCATGTGCGGTGTAGTCGGCGCCC
	27	OroborealAlpineGlacier	moss	moss from mixed stand - location_1	2018	ISL0162	CAATACTGACCGGTACAGTGGGTCCGGACGTGATCGACGTACGCGGTCTGACCGCCACCGGCCGCTTCACATTTGACCCTGGTTTCATGTCCACGGCCTCTTGCGAGTCGAAGATCACCTACATTGATGGTGACAACGGAATTCTGCTGCACCGCGGCTACCCGATCGAACAACTGGCCGAGCAGTCCGATTACCTCGAGACCTGCTACCTGTTGCTCAACGGCGAGCTGCCAACCGCCGAACAGAAAGCCCAGTTCGTGGCCGTGGTCAAGAACCACACGATGGTTCACGAACAACTCAAGACATTCTTCAACGGCTTTCGCCGTGACGCCCACCCGATGGCCGTCATGTGCGGTGTAGTCGGCGCCC
	27	OroborealAlpineGlacier	moss	moss from mixed stand - location_1	2018	ISL0163	CAATACTGACCGGTACAGTGGGTCCGGACGTGATCGACGTACGCGGTCTGACCGCCACCGGCCGCTTCACATTTGACCCTGGTTTCATGTCCACGGCCTCTTGCGAGTCGAAGATCACCTACATTGATGGTGACAACGGAATTCTGCTGCACCGCGGCTACCCGATCGAACAACTGGCCGAGCAGTCCGATTACCTCGAGACCTGCTACCTGTTGCTCAACGGCGAGCTGCCAACCGCCGAACAGAAAGCCCAGTTCGTGGCCGTGGTCAAGAACCACACGATGGTTCACGAACAACTCAAGACATTCTTCAACGGCTTTCGCCGTGACGCCCACCCGATGGCCGTCATGTGCGGTGTAGTCGGCGCCC
	27	OroborealAlpineGlacier	moss	moss from mixed stand - location_1	2018	ISL0164	CAATACTGACCGGTACAGTGGGTCCGGACGTGATCGACGTACGCGGTCTGACCGCCACCGGCCGCTTCACATTTGACCCTGGTTTCATGTCCACGGCCTCTTGCGAGTCGAAGATCACCTACATTGATGGTGACAACGGAATTCTGCTGCACCGCGGCTACCCGATCGAACAACTGGCCGAGCAGTCCGATTACCTCGAGACCTGCTACCTGTTGCTCAACGGCGAGCTGCCAACCGCCGAACAGAAAGCCCAGTTCGTGGCCGTGGTCAAGAACCACACGATGGTTCACGAACAACTCAAGACATTCTTCAACGGCTTTCGCCGTGACGCCCACCCGATGGCCGTCATGTGCGGTGTAGTCGGCGCCC
	27	OroborealAlpineGlacier	moss	moss from mixed stand - location_1	2018	ISL0166	CAATACTGACCGGTACAGTGGGTCCGGACGTGATCGACGTACGCGGTCTGACCGCCACCGGCCGCTTCACATTTGACCCTGGTTTCATGTCCACGGCCTCTTGCGAGTCGAAGATCACCTACATTGATGGTGACAACGGAATTCTGCTGCACCGCGGCTACCCGATCGAACAACTGGCCGAGCAGTCCGATTACCTCGAGACCTGCTACCTGTTGCTCAACGGCGAGCTGCCAACCGCCGAACAGAAAGCCCAGTTCGTGGCCGTGGTCAAGAACCACACGATGGTTCACGAACAACTCAAGACATTCTTCAACGGCTTTCGCCGTGACGCCCACCCGATGGCCGTCATGTGCGGTGTAGTCGGCGCCC
	27	OroborealAlpineGlacier	moss	moss from mixed stand - location_1	2018	ISL0170	CAATACTGACCGGTACAGTGGGTCCGGACGTGATCGACGTACGCGGTCTGACCGCCACCGGCCGCTTCACATTTGACCCTGGTTTCATGTCCACGGCCTCTTGCGAGTCGAAGATCACCTACATTGATGGTGACAACGGAATTCTGCTGCACCGCGGCTACCCGATCGAACAACTGGCCGAGCAGTCCGATTACCTCGAGACCTGCTACCTGTTGCTCAACGGCGAGCTGCCAACCGCCGAACAGAAAGCCCAGTTCGTGGCCGTGGTCAAGAACCACACGATGGTTCACGAACAACTCAAGACATTCTTCAACGGCTTTCGCCGTGACGCCCACCCGATGGCCGTCATGTGCGGTGTAGTCGGCGCCC
	28	OroborealAlpineGlacier	plant	Empetrum nigrum	2020	SU2002_01	CAATACTGACCGGTACAGTGGGTCCGGACGTGATCGACGTACGCGGTCTGACCGCCACCGGCCGCTTCACATTTGACCCTGGTTTCATGTCCACGGCCTCTTGCGAGTCGAAGATCACCTACATTGATGGTGACAACGGAATTCTGCTGCACCGCGGCTACCCGATCGAACAACTGGCCGAGCAGTCCGATTACCTCGAGACCTGCTACCTGTTGCTCAACGGCGAGCTGCCAACCGCCGAACAGAAAGCCCAGTTCGTGGCCGTGGTCAAGAACCACACGATGGTTCACGAACAACTCAAGACCTTCTTCAACGGCTTTCGCCGTGACGCCCACCCGATGGCCGTCATGTGCGGTGTAGTCGGCGCCC
	28	OroborealAlpineGlacier	plant	Empetrum nigrum	2020	SU2002_02	CAATACTGACCGGTACAGTGGGTCCGGACGTGATCGACGTACGCGGTCTGACCGCCACCGGCCGCTTCACATTTGACCCTGGTTTCATGTCCACGGCCTCTTGCGAGTCGAAGATCACCTACATTGATGGTGACAACGGAATTCTGCTGCACCGCGGCTACCCGATCGAACAACTGGCCGAGCAGTCCGATTACCTCGAGACCTGCTACCTGTTGCTCAACGGCGAGCTGCCAACCGCCGAACAGAAAGCCCAGTTCGTGGCCGTGGTCAAGAACCACACGATGGTTCACGAACAACTCAAGACCTTCTTCAACGGCTTTCGCCGTGACGCCCACCCGATGGCCGTCATGTGCGGTGTAGTCGGCGCCC
	28	OroborealAlpineGlacier	plant	Empetrum nigrum	2020	SU2002_03	CAATACTGACCGGTACAGTGGGTCCGGACGTGATCGACGTACGCGGTCTGACCGCCACCGGCCGCTTCACATTTGACCCTGGTTTCATGTCCACGGCCTCTTGCGAGTCGAAGATCACCTACATTGATGGTGACAACGGAATTCTGCTGCACCGCGGCTACCCGATCGAACAACTGGCCGAGCAGTCCGATTACCTCGAGACCTGCTACCTGTTGCTCAACGGCGAGCTGCCAACCGCCGAACAGAAAGCCCAGTTCGTGGCCGTGGTCAAGAACCACACGATGGTTCACGAACAACTCAAGACCTTCTTCAACGGCTTTCGCCGTGACGCCCACCCGATGGCCGTCATGTGCGGTGTAGTCGGCGCCC
	28	OroborealAlpineGlacier	plant	Empetrum nigrum	2020	SU2002_04	CAATACTGACCGGTACAGTGGGTCCGGACGTGATCGACGTACGCGGTCTGACCGCCACCGGCCGCTTCACATTTGACCCTGGTTTCATGTCCACGGCCTCTTGCGAGTCGAAGATCACCTACATTGATGGTGACAACGGAATTCTGCTGCACCGCGGCTACCCGATCGAACAACTGGCCGAGCAGTCCGATTACCTCGAGACCTGCTACCTGTTGCTCAACGGCGAGCTGCCAACCGCCGAACAGAAAGCCCAGTTCGTGGCCGTGGTCAAGAACCACACGATGGTTCACGAACAACTCAAGACCTTCTTCAACGGCTTTCGCCGTGACGCCCACCCGATGGCCGTCATGTGCGGTGTAGTCGGCGCCC
	28	OroborealAlpineGlacier	plant	Empetrum nigrum	2020	SU2002_05	CAATACTGACCGGTACAGTGGGTCCGGACGTGATCGACGTACGCGGTCTGACCGCCACCGGCCGCTTCACATTTGACCCTGGTTTCATGTCCACGGCCTCTTGCGAGTCGAAGATCACCTACATTGATGGTGACAACGGAATTCTGCTGCACCGCGGCTACCCGATCGAACAACTGGCCGAGCAGTCCGATTACCTCGAGACCTGCTACCTGTTGCTCAACGGCGAGCTGCCAACCGCCGAACAGAAAGCCCAGTTCGTGGCCGTGGTCAAGAACCACACGATGGTTCACGAACAACTCAAGACCTTCTTCAACGGCTTTCGCCGTGACGCCCACCCGATGGCCGTCATGTGCGGTGTAGTCGGCGCCC
	28	OroborealAlpineGlacier	plant	Empetrum nigrum	2020	SU2002_06	CAATACTGACCGGTACAGTGGGTCCGGACGTGATCGACGTACGCGGTCTGACCGCCACCGGCCGCTTCACATTTGACCCTGGTTTCATGTCCACGGCCTCTTGCGAGTCGAAGATCACCTACATTGATGGTGACAACGGAATTCTGCTGCACCGCGGCTACCCGATCGAACAACTGGCCGAGCAGTCCGATTACCTCGAGACCTGCTACCTGTTGCTCAACGGCGAGCTGCCAACCGCCGAACAGAAAGCCCAGTTCGTGGCCGTGGTCAAGAACCACACGATGGTTCACGAACAACTCAAGACCTTCTTCAACGGCTTTCGCCGTGACGCCCACCCGATGGCCGTCATGTGCGGTGTAGTCGGCGCCC
	28	OroborealAlpineGlacier	plant	Empetrum nigrum	2020	SU2002_07	CAATACTGACCGGTACAGTGGGTCCGGACGTGATCGACGTACGCGGTCTGACCGCCACCGGCCGCTTCACATTTGACCCTGGTTTCATGTCCACGGCCTCTTGCGAGTCGAAGATCACCTACATTGATGGTGACAACGGAATTCTGCTGCACCGCGGCTACCCGATCGAACAACTGGCCGAGCAGTCCGATTACCTCGAGACCTGCTACCTGTTGCTCAACGGCGAGCTGCCAACCGCCGAACAGAAAGCCCAGTTCGTGGCCGTGGTCAAGAACCACACGATGGTTCACGAACAACTCAAGACCTTCTTCAACGGCTTTCGCCGTGACGCCCACCCGATGGCCGTCATGTGCGGTGTAGTCGGCGCCC
	28	OroborealAlpineGlacier	plant	Empetrum nigrum	2020	SU2002_10	CAATACTGACCGGTACAGTGGGTCCGGACGTGATCGACGTACGCGGTCTGACCGCCACCGGCCGCTTCACATTTGACCCTGGTTTCATGTCCACGGCCTCTTGCGAGTCGAAGATCACCTACATTGATGGTGACAACGGAATTCTGCTGCACCGCGGCTACCCGATCGAACAACTGGCCGAGCAGTCCGATTACCTCGAGACCTGCTACCTGTTGCTCAACGGCGAGCTGCCAACCGCCGAACAGAAAGCCCAGTTCGTGGCCGTGGTCAAGAACCACACGATGGTTCACGAACAACTCAAGACCTTCTTCAACGGCTTTCGCCGTGACGCCCACCCGATGGCCGTCATGTGCGGTGTAGTCGGCGCCC
	28	OroborealAlpineGlacier	plant	Empetrum nigrum	2020	SU2002_11	CAATACTGACCGGTACAGTGGGTCCGGACGTGATCGACGTACGCGGTCTGACCGCCACCGGCCGCTTCACATTTGACCCTGGTTTCATGTCCACGGCCTCTTGCGAGTCGAAGATCACCTACATTGATGGTGACAACGGAATTCTGCTGCACCGCGGCTACCCGATCGAACAACTGGCCGAGCAGTCCGATTACCTCGAGACCTGCTACCTGTTGCTCAACGGCGAGCTGCCAACCGCCGAACAGAAAGCCCAGTTCGTGGCCGTGGTCAAGAACCACACGATGGTTCACGAACAACTCAAGACCTTCTTCAACGGCTTTCGCCGTGACGCCCACCCGATGGCCGTCATGTGCGGTGTAGTCGGCGCCC
	28	OroborealAlpineGlacier	plant	Empetrum nigrum	2020	SU2002_12	CAATACTGACCGGTACAGTGGGTCCGGACGTGATCGACGTACGCGGTCTGACCGCCACCGGCCGCTTCACATTTGACCCTGGTTTCATGTCCACGGCCTCTTGCGAGTCGAAGATCACCTACATTGATGGTGACAACGGAATTCTGCTGCACCGCGGCTACCCGATCGAACAACTGGCCGAGCAGTCCGATTACCTCGAGACCTGCTACCTGTTGCTCAACGGCGAGCTGCCAACCGCCGAACAGAAAGCCCAGTTCGTGGCCGTGGTCAAGAACCACACGATGGTTCACGAACAACTCAAGACCTTCTTCAACGGCTTTCGCCGTGACGCCCACCCGATGGCCGTCATGTGCGGTGTAGTCGGCGCCC
	28	OroborealAlpineGlacier	plant	Empetrum nigrum	2020	SU2002_13	CAATACTGACCGGTACAGTGGGTCCGGACGTGATCGACGTACGCGGTCTGACCGCCACCGGCCGCTTCACATTTGACCCTGGTTTCATGTCCACGGCCTCTTGCGAGTCGAAGATCACCTACATTGATGGTGACAACGGAATTCTGCTGCACCGCGGCTACCCGATCGAACAACTGGCCGAGCAGTCCGATTACCTCGAGACCTGCTACCTGTTGCTCAACGGCGAGCTGCCAACCGCCGAACAGAAAGCCCAGTTCGTGGCCGTGGTCAAGAACCACACGATGGTTCACGAACAACTCAAGACCTTCTTCAACGGCTTTCGCCGTGACGCCCACCCGATGGCCGTCATGTGCGGTGTAGTCGGCGCCC
	28	OroborealAlpineGlacier	plant	Empetrum nigrum	2020	SU2002_15	CAATACTGACCGGTACAGTGGGTCCGGACGTGATCGACGTACGCGGTCTGACCGCCACCGGCCGCTTCACATTTGACCCTGGTTTCATGTCCACGGCCTCTTGCGAGTCGAAGATCACCTACATTGATGGTGACAACGGAATTCTGCTGCACCGCGGCTACCCGATCGAACAACTGGCCGAGCAGTCCGATTACCTCGAGACCTGCTACCTGTTGCTCAACGGCGAGCTGCCAACCGCCGAACAGAAAGCCCAGTTCGTGGCCGTGGTCAAGAACCACACGATGGTTCACGAACAACTCAAGACCTTCTTCAACGGCTTTCGCCGTGACGCCCACCCGATGGCCGTCATGTGCGGTGTAGTCGGCGCCC
	28	OroborealAlpineGlacier	plant	Empetrum nigrum	2020	SU2002_16	CAATACTGACCGGTACAGTGGGTCCGGACGTGATCGACGTACGCGGTCTGACCGCCACCGGCCGCTTCACATTTGACCCTGGTTTCATGTCCACGGCCTCTTGCGAGTCGAAGATCACCTACATTGATGGTGACAACGGAATTCTGCTGCACCGCGGCTACCCGATCGAACAACTGGCCGAGCAGTCCGATTACCTCGAGACCTGCTACCTGTTGCTCAACGGCGAGCTGCCAACCGCCGAACAGAAAGCCCAGTTCGTGGCCGTGGTCAAGAACCACACGATGGTTCACGAACAACTCAAGACCTTCTTCAACGGCTTTCGCCGTGACGCCCACCCGATGGCCGTCATGTGCGGTGTAGTCGGCGCCC
	28	OroborealAlpineGlacier	plant	Empetrum nigrum	2020	SU2002_17	CAATACTGACCGGTACAGTGGGTCCGGACGTGATCGACGTACGCGGTCTGACCGCCACCGGCCGCTTCACATTTGACCCTGGTTTCATGTCCACGGCCTCTTGCGAGTCGAAGATCACCTACATTGATGGTGACAACGGAATTCTGCTGCACCGCGGCTACCCGATCGAACAACTGGCCGAGCAGTCCGATTACCTCGAGACCTGCTACCTGTTGCTCAACGGCGAGCTGCCAACCGCCGAACAGAAAGCCCAGTTCGTGGCCGTGGTCAAGAACCACACGATGGTTCACGAACAACTCAAGACCTTCTTCAACGGCTTTCGCCGTGACGCCCACCCGATGGCCGTCATGTGCGGTGTAGTCGGCGCCC
	28	OroborealAlpineGlacier	plant	Empetrum nigrum	2020	SU2002_18	CAATACTGACCGGTACAGTGGGTCCGGACGTGATCGACGTACGCGGTCTGACCGCCACCGGCCGCTTCACATTTGACCCTGGTTTCATGTCCACGGCCTCTTGCGAGTCGAAGATCACCTACATTGATGGTGACAACGGAATTCTGCTGCACCGCGGCTACCCGATCGAACAACTGGCCGAGCAGTCCGATTACCTCGAGACCTGCTACCTGTTGCTCAACGGCGAGCTGCCAACCGCCGAACAGAAAGCCCAGTTCGTGGCCGTGGTCAAGAACCACACGATGGTTCACGAACAACTCAAGACCTTCTTCAACGGCTTTCGCCGTGACGCCCACCCGATGGCCGTCATGTGCGGTGTAGTCGGCGCCC
	28	OroborealAlpineGlacier	plant	Empetrum nigrum	2020	SU2002_19	CAATACTGACCGGTACAGTGGGTCCGGACGTGATCGACGTACGCGGTCTGACCGCCACCGGCCGCTTCACATTTGACCCTGGTTTCATGTCCACGGCCTCTTGCGAGTCGAAGATCACCTACATTGATGGTGACAACGGAATTCTGCTGCACCGCGGCTACCCGATCGAACAACTGGCCGAGCAGTCCGATTACCTCGAGACCTGCTACCTGTTGCTCAACGGCGAGCTGCCAACCGCCGAACAGAAAGCCCAGTTCGTGGCCGTGGTCAAGAACCACACGATGGTTCACGAACAACTCAAGACCTTCTTCAACGGCTTTCGCCGTGACGCCCACCCGATGGCCGTCATGTGCGGTGTAGTCGGCGCCC
	28	OroborealAlpineGlacier	plant	Empetrum nigrum	2020	SU2002_20	CAATACTGACCGGTACAGTGGGTCCGGACGTGATCGACGTACGCGGTCTGACCGCCACCGGCCGCTTCACATTTGACCCTGGTTTCATGTCCACGGCCTCTTGCGAGTCGAAGATCACCTACATTGATGGTGACAACGGAATTCTGCTGCACCGCGGCTACCCGATCGAACAACTGGCCGAGCAGTCCGATTACCTCGAGACCTGCTACCTGTTGCTCAACGGCGAGCTGCCAACCGCCGAACAGAAAGCCCAGTTCGTGGCCGTGGTCAAGAACCACACGATGGTTCACGAACAACTCAAGACCTTCTTCAACGGCTTTCGCCGTGACGCCCACCCGATGGCCGTCATGTGCGGTGTAGTCGGCGCCC
	28	OroborealAlpineGlacier	plant	Empetrum nigrum	2020	SU2002_21	CAATACTGACCGGTACAGTGGGTCCGGACGTGATCGACGTACGCGGTCTGACCGCCACCGGCCGCTTCACATTTGACCCTGGTTTCATGTCCACGGCCTCTTGCGAGTCGAAGATCACCTACATTGATGGTGACAACGGAATTCTGCTGCACCGCGGCTACCCGATCGAACAACTGGCCGAGCAGTCCGATTACCTCGAGACCTGCTACCTGTTGCTCAACGGCGAGCTGCCAACCGCCGAACAGAAAGCCCAGTTCGTGGCCGTGGTCAAGAACCACACGATGGTTCACGAACAACTCAAGACCTTCTTCAACGGCTTTCGCCGTGACGCCCACCCGATGGCCGTCATGTGCGGTGTAGTCGGCGCCC
	28	OroborealAlpineGlacier	plant	Empetrum nigrum	2020	SU2002_22	CAATACTGACCGGTACAGTGGGTCCGGACGTGATCGACGTACGCGGTCTGACCGCCACCGGCCGCTTCACATTTGACCCTGGTTTCATGTCCACGGCCTCTTGCGAGTCGAAGATCACCTACATTGATGGTGACAACGGAATTCTGCTGCACCGCGGCTACCCGATCGAACAACTGGCCGAGCAGTCCGATTACCTCGAGACCTGCTACCTGTTGCTCAACGGCGAGCTGCCAACCGCCGAACAGAAAGCCCAGTTCGTGGCCGTGGTCAAGAACCACACGATGGTTCACGAACAACTCAAGACCTTCTTCAACGGCTTTCGCCGTGACGCCCACCCGATGGCCGTCATGTGCGGTGTAGTCGGCGCCC
	28	OroborealAlpineGlacier	plant	Empetrum nigrum	2020	SU2002_23	CAATACTGACCGGTACAGTGGGTCCGGACGTGATCGACGTACGCGGTCTGACCGCCACCGGCCGCTTCACATTTGACCCTGGTTTCATGTCCACGGCCTCTTGCGAGTCGAAGATCACCTACATTGATGGTGACAACGGAATTCTGCTGCACCGCGGCTACCCGATCGAACAACTGGCCGAGCAGTCCGATTACCTCGAGACCTGCTACCTGTTGCTCAACGGCGAGCTGCCAACCGCCGAACAGAAAGCCCAGTTCGTGGCCGTGGTCAAGAACCACACGATGGTTCACGAACAACTCAAGACCTTCTTCAACGGCTTTCGCCGTGACGCCCACCCGATGGCCGTCATGTGCGGTGTAGTCGGCGCCC
	28	OroborealAlpineGlacier	plant	Empetrum nigrum	2020	SU2002_24	CAATACTGACCGGTACAGTGGGTCCGGACGTGATCGACGTACGCGGTCTGACCGCCACCGGCCGCTTCACATTTGACCCTGGTTTCATGTCCACGGCCTCTTGCGAGTCGAAGATCACCTACATTGATGGTGACAACGGAATTCTGCTGCACCGCGGCTACCCGATCGAACAACTGGCCGAGCAGTCCGATTACCTCGAGACCTGCTACCTGTTGCTCAACGGCGAGCTGCCAACCGCCGAACAGAAAGCCCAGTTCGTGGCCGTGGTCAAGAACCACACGATGGTTCACGAACAACTCAAGACCTTCTTCAACGGCTTTCGCCGTGACGCCCACCCGATGGCCGTCATGTGCGGTGTAGTCGGCGCCC
	28	OroborealAlpineGlacier	plant	Empetrum nigrum	2020	SU2002_25	CAATACTGACCGGTACAGTGGGTCCGGACGTGATCGACGTACGCGGTCTGACCGCCACCGGCCGCTTCACATTTGACCCTGGTTTCATGTCCACGGCCTCTTGCGAGTCGAAGATCACCTACATTGATGGTGACAACGGAATTCTGCTGCACCGCGGCTACCCGATCGAACAACTGGCCGAGCAGTCCGATTACCTCGAGACCTGCTACCTGTTGCTCAACGGCGAGCTGCCAACCGCCGAACAGAAAGCCCAGTTCGTGGCCGTGGTCAAGAACCACACGATGGTTCACGAACAACTCAAGACCTTCTTCAACGGCTTTCGCCGTGACGCCCACCCGATGGCCGTCATGTGCGGTGTAGTCGGCGCCC
	28	OroborealAlpineGlacier	plant	Empetrum nigrum	2020	SU2002_26	CAATACTGACCGGTACAGTGGGTCCGGACGTGATCGACGTACGCGGTCTGACCGCCACCGGCCGCTTCACATTTGACCCTGGTTTCATGTCCACGGCCTCTTGCGAGTCGAAGATCACCTACATTGATGGTGACAACGGAATTCTGCTGCACCGCGGCTACCCGATCGAACAACTGGCCGAGCAGTCCGATTACCTCGAGACCTGCTACCTGTTGCTCAACGGCGAGCTGCCAACCGCCGAACAGAAAGCCCAGTTCGTGGCCGTGGTCAAGAACCACACGATGGTTCACGAACAACTCAAGACCTTCTTCAACGGCTTTCGCCGTGACGCCCACCCGATGGCCGTCATGTGCGGTGTAGTCGGCGCCC
	28	OroborealAlpineGlacier	plant	Empetrum nigrum	2020	SU2002_28	CAATACTGACCGGTACAGTGGGTCCGGACGTGATCGACGTACGCGGTCTGACCGCCACCGGCCGCTTCACATTTGACCCTGGTTTCATGTCCACGGCCTCTTGCGAGTCGAAGATCACCTACATTGATGGTGACAACGGAATTCTGCTGCACCGCGGCTACCCGATCGAACAACTGGCCGAGCAGTCCGATTACCTCGAGACCTGCTACCTGTTGCTCAACGGCGAGCTGCCAACCGCCGAACAGAAAGCCCAGTTCGTGGCCGTGGTCAAGAACCACACGATGGTTCACGAACAACTCAAGACCTTCTTCAACGGCTTTCGCCGTGACGCCCACCCGATGGCCGTCATGTGCGGTGTAGTCGGCGCCC
	28	OroborealAlpineGlacier	plant	Empetrum nigrum	2020	SU2002_30	CAATACTGACCGGTACAGTGGGTCCGGACGTGATCGACGTACGCGGTCTGACCGCCACCGGCCGCTTCACATTTGACCCTGGTTTCATGTCCACGGCCTCTTGCGAGTCGAAGATCACCTACATTGATGGTGACAACGGAATTCTGCTGCACCGCGGCTACCCGATCGAACAACTGGCCGAGCAGTCCGATTACCTCGAGACCTGCTACCTGTTGCTCAACGGCGAGCTGCCAACCGCCGAACAGAAAGCCCAGTTCGTGGCCGTGGTCAAGAACCACACGATGGTTCACGAACAACTCAAGACCTTCTTCAACGGCTTTCGCCGTGACGCCCACCCGATGGCCGTCATGTGCGGTGTAGTCGGCGCCC
	28	OroborealAlpineGlacier	moss	Hylocomium splendens	2020	SU2003_01	CAATACTGACCGGTACAGTGGGTCCGGACGTGATCGACGTACGCGGTCTGACCGCCACCGGCCGCTTCACATTTGACCCTGGTTTCATGTCCACGGCCTCTTGCGAGTCGAAGATCACCTACATTGATGGTGACAACGGAATTCTGCTGCACCGCGGCTACCCGATCGAACAACTGGCCGAGCAGTCCGATTACCTCGAGACCTGCTACCTGTTGCTCAACGGCGAGCTGCCAACCGCCGAACAGAAAGCCCAGTTCGTGGCCGTGGTCAAGAACCACACGATGGTTCACGAACAACTCAAGACCTTCTTCAACGGCTTTCGCCGTGACGCCCACCCGATGGCCGTCATGTGCGGTGTAGTCGGCGCCC
	28	OroborealAlpineGlacier	moss	Hylocomium splendens	2020	SU2003_03	CAATACTGACCGGTACAGTGGGTCCGGACGTGATCGACGTACGCGGTCTGACCGCCACCGGCCGCTTCACATTTGACCCTGGTTTCATGTCCACGGCCTCTTGCGAGTCGAAGATCACCTACATTGATGGTGACAACGGAATTCTGCTGCACCGCGGCTACCCGATCGAACAACTGGCCGAGCAGTCCGATTACCTCGAGACCTGCTACCTGTTGCTCAACGGCGAGCTGCCAACCGCCGAACAGAAAGCCCAGTTCGTGGCCGTGGTCAAGAACCACACGATGGTTCACGAACAACTCAAGACCTTCTTCAACGGCTTTCGCCGTGACGCCCACCCGATGGCCGTCATGTGCGGTGTAGTCGGCGCCC
	28	OroborealAlpineGlacier	moss	Hylocomium splendens	2020	SU2003_06	CAATACTGACCGGTACAGTGGGTCCGGACGTGATCGACGTACGCGGTCTGACCGCCACCGGCCGCTTCACATTTGACCCTGGTTTCATGTCCACGGCCTCTTGCGAGTCGAAGATCACCTACATTGATGGTGACAACGGAATTCTGCTGCACCGCGGCTACCCGATCGAACAACTGGCCGAGCAGTCCGATTACCTCGAGACCTGCTACCTGTTGCTCAACGGCGAGCTGCCAACCGCCGAACAGAAAGCCCAGTTCGTGGCCGTGGTCAAGAACCACACGATGGTTCACGAACAACTCAAGACCTTCTTCAACGGCTTTCGCCGTGACGCCCACCCGATGGCCGTCATGTGCGGTGTAGTCGGCGCCC
	28	OroborealAlpineGlacier	moss	Hylocomium splendens	2020	SU2003_07	CAATACTGACCGGTACAGTGGGTCCGGACGTGATCGACGTACGCGGTCTGACCGCCACCGGCCGCTTCACATTTGACCCTGGTTTCATGTCCACGGCCTCTTGCGAGTCGAAGATCACCTACATTGATGGTGACAACGGAATTCTGCTGCACCGCGGCTACCCGATCGAACAACTGGCCGAGCAGTCCGATTACCTCGAGACCTGCTACCTGTTGCTCAACGGCGAGCTGCCAACCGCCGAACAGAAAGCCCAGTTCGTGGCCGTGGTCAAGAACCACACGATGGTTCACGAACAACTCAAGACCTTCTTCAACGGCTTTCGCCGTGACGCCCACCCGATGGCCGTCATGTGCGGTGTAGTCGGCGCCC
	28	OroborealAlpineGlacier	moss	Hylocomium splendens	2020	SU2003_08	CAATACTGACCGGTACAGTGGGTCCGGACGTGATCGACGTACGCGGTCTGACCGCCACCGGCCGCTTCACATTTGACCCTGGTTTCATGTCCACGGCCTCTTGCGAGTCGAAGATCACCTACATTGATGGTGACAACGGAATTCTGCTGCACCGCGGCTACCCGATCGAACAACTGGCCGAGCAGTCCGATTACCTCGAGACCTGCTACCTGTTGCTCAACGGCGAGCTGCCAACCGCCGAACAGAAAGCCCAGTTCGTGGCCGTGGTCAAGAACCACACGATGGTTCACGAACAACTCAAGACCTTCTTCAACGGCTTTCGCCGTGACGCCCACCCGATGGCCGTCATGTGCGGTGTAGTCGGCGCCC
	28	OroborealAlpineGlacier	moss	Hylocomium splendens	2020	SU2003_10	CAATACTGACCGGTACAGTGGGTCCGGACGTGATCGACGTACGCGGTCTGACCGCCACCGGCCGCTTCACATTTGACCCTGGTTTCATGTCCACGGCCTCTTGCGAGTCGAAGATCACCTACATTGATGGTGACAACGGAATTCTGCTGCACCGCGGCTACCCGATCGAACAACTGGCCGAGCAGTCCGATTACCTCGAGACCTGCTACCTGTTGCTCAACGGCGAGCTGCCAACCGCCGAACAGAAAGCCCAGTTCGTGGCCGTGGTCAAGAACCACACGATGGTTCACGAACAACTCAAGACCTTCTTCAACGGCTTTCGCCGTGACGCCCACCCGATGGCCGTCATGTGCGGTGTAGTCGGCGCCC
	28	OroborealAlpineGlacier	moss	Hylocomium splendens	2020	SU2003_13	CAATACTGACCGGTACAGTGGGTCCGGACGTGATCGACGTACGCGGTCTGACCGCCACCGGCCGCTTCACATTTGACCCTGGTTTCATGTCCACGGCCTCTTGCGAGTCGAAGATCACCTACATTGATGGTGACAACGGAATTCTGCTGCACCGCGGCTACCCGATCGAACAACTGGCCGAGCAGTCCGATTACCTCGAGACCTGCTACCTGTTGCTCAACGGCGAGCTGCCAACCGCCGAACAGAAAGCCCAGTTCGTGGCCGTGGTCAAGAACCACACGATGGTTCACGAACAACTCAAGACCTTCTTCAACGGCTTTCGCCGTGACGCCCACCCGATGGCCGTCATGTGCGGTGTAGTCGGCGCCC
	28	OroborealAlpineGlacier	moss	Hylocomium splendens	2020	SU2003_17	CAATACTGACCGGTACAGTGGGTCCGGACGTGATCGACGTACGCGGTCTGACCGCCACCGGCCGCTTCACATTTGACCCTGGTTTCATGTCCACGGCCTCTTGCGAGTCGAAGATCACCTACATTGATGGTGACAACGGAATTCTGCTGCACCGCGGCTACCCGATCGAACAACTGGCCGAGCAGTCCGATTACCTCGAGACCTGCTACCTGTTGCTCAACGGCGAGCTGCCAACCGCCGAACAGAAAGCCCAGTTCGTGGCCGTGGTCAAGAACCACACGATGGTTCACGAACAACTCAAGACCTTCTTCAACGGCTTTCGCCGTGACGCCCACCCGATGGCCGTCATGTGCGGTGTAGTCGGCGCCC
	28	OroborealAlpineGlacier	moss	Hylocomium splendens	2020	SU2003_18	CAATACTGACCGGTACAGTGGGTCCGGACGTGATCGACGTACGCGGTCTGACCGCCACCGGCCGCTTCACATTTGACCCTGGTTTCATGTCCACGGCCTCTTGCGAGTCGAAGATCACCTACATTGATGGTGACAACGGAATTCTGCTGCACCGCGGCTACCCGATCGAACAACTGGCCGAGCAGTCCGATTACCTCGAGACCTGCTACCTGTTGCTCAACGGCGAGCTGCCAACCGCCGAACAGAAAGCCCAGTTCGTGGCCGTGGTCAAGAACCACACGATGGTTCACGAACAACTCAAGACCTTCTTCAACGGCTTTCGCCGTGACGCCCACCCGATGGCCGTCATGTGCGGTGTAGTCGGCGCCC
	28	OroborealAlpineGlacier	moss	Hylocomium splendens	2020	SU2003_21	CAATACTGACCGGTACAGTGGGTCCGGACGTGATCGACGTACGCGGTCTGACCGCCACCGGCCGCTTCACATTTGACCCTGGTTTCATGTCCACGGCCTCTTGCGAGTCGAAGATCACCTACATTGATGGTGACAACGGAATTCTGCTGCACCGCGGCTACCCGATCGAACAACTGGCCGAGCAGTCCGATTACCTCGAGACCTGCTACCTGTTGCTCAACGGCGAGCTGCCAACCGCCGAACAGAAAGCCCAGTTCGTGGCCGTGGTCAAGAACCACACGATGGTTCACGAACAACTCAAGACCTTCTTCAACGGCTTTCGCCGTGACGCCCACCCGATGGCCGTCATGTGCGGTGTAGTCGGCGCCC
	28	OroborealAlpineGlacier	moss	Hylocomium splendens	2020	SU2003_22	CAATACTGACCGGTACAGTGGGTCCGGACGTGATCGACGTACGCGGTCTGACCGCCACCGGCCGCTTCACATTTGACCCTGGTTTCATGTCCACGGCCTCTTGCGAGTCGAAGATCACCTACATTGATGGTGACAACGGAATTCTGCTGCACCGCGGCTACCCGATCGAACAACTGGCCGAGCAGTCCGATTACCTCGAGACCTGCTACCTGTTGCTCAACGGCGAGCTGCCAACCGCCGAACAGAAAGCCCAGTTCGTGGCCGTGGTCAAGAACCACACGATGGTTCACGAACAACTCAAGACCTTCTTCAACGGCTTTCGCCGTGACGCCCACCCGATGGCCGTCATGTGCGGTGTAGTCGGCGCCC
	28	OroborealAlpineGlacier	moss	Hylocomium splendens	2020	SU2003_25	CAATACTGACCGGTACAGTGGGTCCGGACGTGATCGACGTACGCGGTCTGACCGCCACCGGCCGCTTCACATTTGACCCTGGTTTCATGTCCACGGCCTCTTGCGAGTCGAAGATCACCTACATTGATGGTGACAACGGAATTCTGCTGCACCGCGGCTACCCGATCGAACAACTGGCCGAGCAGTCCGATTACCTCGAGACCTGCTACCTGTTGCTCAACGGCGAGCTGCCAACCGCCGAACAGAAAGCCCAGTTCGTGGCCGTGGTCAAGAACCACACGATGGTTCACGAACAACTCAAGACCTTCTTCAACGGCTTTCGCCGTGACGCCCACCCGATGGCCGTCATGTGCGGTGTAGTCGGCGCCC
	28	OroborealAlpineGlacier	moss	Hylocomium splendens	2020	SU2003_26	CAATACTGACCGGTACAGTGGGTCCGGACGTGATCGACGTACGCGGTCTGACCGCCACCGGCCGCTTCACATTTGACCCTGGTTTCATGTCCACGGCCTCTTGCGAGTCGAAGATCACCTACATTGATGGTGACAACGGAATTCTGCTGCACCGCGGCTACCCGATCGAACAACTGGCCGAGCAGTCCGATTACCTCGAGACCTGCTACCTGTTGCTCAACGGCGAGCTGCCAACCGCCGAACAGAAAGCCCAGTTCGTGGCCGTGGTCAAGAACCACACGATGGTTCACGAACAACTCAAGACCTTCTTCAACGGCTTTCGCCGTGACGCCCACCCGATGGCCGTCATGTGCGGTGTAGTCGGCGCCC
	28	OroborealAlpineGlacier	moss	Hylocomium splendens	2020	SU2003_27	CAATACTGACCGGTACAGTGGGTCCGGACGTGATCGACGTACGCGGTCTGACCGCCACCGGCCGCTTCACATTTGACCCTGGTTTCATGTCCACGGCCTCTTGCGAGTCGAAGATCACCTACATTGATGGTGACAACGGAATTCTGCTGCACCGCGGCTACCCGATCGAACAACTGGCCGAGCAGTCCGATTACCTCGAGACCTGCTACCTGTTGCTCAACGGCGAGCTGCCAACCGCCGAACAGAAAGCCCAGTTCGTGGCCGTGGTCAAGAACCACACGATGGTTCACGAACAACTCAAGACCTTCTTCAACGGCTTTCGCCGTGACGCCCACCCGATGGCCGTCATGTGCGGTGTAGTCGGCGCCC
	28	OroborealAlpineGlacier	moss	Hylocomium splendens	2020	SU2003_29	CAATACTGACCGGTACAGTGGGTCCGGACGTGATCGACGTACGCGGTCTGACCGCCACCGGCCGCTTCACATTTGACCCTGGTTTCATGTCCACGGCCTCTTGCGAGTCGAAGATCACCTACATTGATGGTGACAACGGAATTCTGCTGCACCGCGGCTACCCGATCGAACAACTGGCCGAGCAGTCCGATTACCTCGAGACCTGCTACCTGTTGCTCAACGGCGAGCTGCCAACCGCCGAACAGAAAGCCCAGTTCGTGGCCGTGGTCAAGAACCACACGATGGTTCACGAACAACTCAAGACCTTCTTCAACGGCTTTCGCCGTGACGCCCACCCGATGGCCGTCATGTGCGGTGTAGTCGGCGCCC
	29	forest	plant	Rubus saxatilis	2020	EG2011_03	CAATACTGACCGGTACAGTGGGTCCGGACGTGATCGACGTACGCGGTCTGACCGCCACCGGCCGCTTCACATTTGACCCTGGCTTCATGTCCACGGCCTCTTGCGAGTCGAAGATCACCTACATTGATGGTGACAACGGAATTCTGCTGCACCGCGGCTACCCGATCGAACAACTGGCCGAGCAGTCCGATTACCTCGAGACCTGCTACCTGTTGCTCAACGGCGAGCTGCCAACCGCCGAACAGAAAGCCCAGTTCGTGGCCGTGGTCAAGAACCACACGATGGTTCACGAACAACTCAAGACCTTCTTCAACGGCTTTCGCCGTGACGCCCACCCGATGGCCGTCATGTGCGGTGTAGTCGGCGCCC
	29	forest	plant	Rubus saxatilis	2020	EG2011_04	CAATACTGACCGGTACAGTGGGTCCGGACGTGATCGACGTACGCGGTCTGACCGCCACCGGCCGCTTCACATTTGACCCTGGCTTCATGTCCACGGCCTCTTGCGAGTCGAAGATCACCTACATTGATGGTGACAACGGAATTCTGCTGCACCGCGGCTACCCGATCGAACAACTGGCCGAGCAGTCCGATTACCTCGAGACCTGCTACCTGTTGCTCAACGGCGAGCTGCCAACCGCCGAACAGAAAGCCCAGTTCGTGGCCGTGGTCAAGAACCACACGATGGTTCACGAACAACTCAAGACCTTCTTCAACGGCTTTCGCCGTGACGCCCACCCGATGGCCGTCATGTGCGGTGTAGTCGGCGCCC
	29	forest	plant	Rubus saxatilis	2020	EG2011_05	CAATACTGACCGGTACAGTGGGTCCGGACGTGATCGACGTACGCGGTCTGACCGCCACCGGCCGCTTCACATTTGACCCTGGCTTCATGTCCACGGCCTCTTGCGAGTCGAAGATCACCTACATTGATGGTGACAACGGAATTCTGCTGCACCGCGGCTACCCGATCGAACAACTGGCCGAGCAGTCCGATTACCTCGAGACCTGCTACCTGTTGCTCAACGGCGAGCTGCCAACCGCCGAACAGAAAGCCCAGTTCGTGGCCGTGGTCAAGAACCACACGATGGTTCACGAACAACTCAAGACCTTCTTCAACGGCTTTCGCCGTGACGCCCACCCGATGGCCGTCATGTGCGGTGTAGTCGGCGCCC
	29	forest	plant	Rubus saxatilis	2020	EG2011_06	CAATACTGACCGGTACAGTGGGTCCGGACGTGATCGACGTACGCGGTCTGACCGCCACCGGCCGCTTCACATTTGACCCTGGCTTCATGTCCACGGCCTCTTGCGAGTCGAAGATCACCTACATTGATGGTGACAACGGAATTCTGCTGCACCGCGGCTACCCGATCGAACAACTGGCCGAGCAGTCCGATTACCTCGAGACCTGCTACCTGTTGCTCAACGGCGAGCTGCCAACCGCCGAACAGAAAGCCCAGTTCGTGGCCGTGGTCAAGAACCACACGATGGTTCACGAACAACTCAAGACCTTCTTCAACGGCTTTCGCCGTGACGCCCACCCGATGGCCGTCATGTGCGGTGTAGTCGGCGCCC
	29	forest	plant	Rubus saxatilis	2020	EG2011_07	CAATACTGACCGGTACAGTGGGTCCGGACGTGATCGACGTACGCGGTCTGACCGCCACCGGCCGCTTCACATTTGACCCTGGCTTCATGTCCACGGCCTCTTGCGAGTCGAAGATCACCTACATTGATGGTGACAACGGAATTCTGCTGCACCGCGGCTACCCGATCGAACAACTGGCCGAGCAGTCCGATTACCTCGAGACCTGCTACCTGTTGCTCAACGGCGAGCTGCCAACCGCCGAACAGAAAGCCCAGTTCGTGGCCGTGGTCAAGAACCACACGATGGTTCACGAACAACTCAAGACCTTCTTCAACGGCTTTCGCCGTGACGCCCACCCGATGGCCGTCATGTGCGGTGTAGTCGGCGCCC
	29	forest	plant	Rubus saxatilis	2020	EG2011_08	CAATACTGACCGGTACAGTGGGTCCGGACGTGATCGACGTACGCGGTCTGACCGCCACCGGCCGCTTCACATTTGACCCTGGCTTCATGTCCACGGCCTCTTGCGAGTCGAAGATCACCTACATTGATGGTGACAACGGAATTCTGCTGCACCGCGGCTACCCGATCGAACAACTGGCCGAGCAGTCCGATTACCTCGAGACCTGCTACCTGTTGCTCAACGGCGAGCTGCCAACCGCCGAACAGAAAGCCCAGTTCGTGGCCGTGGTCAAGAACCACACGATGGTTCACGAACAACTCAAGACCTTCTTCAACGGCTTTCGCCGTGACGCCCACCCGATGGCCGTCATGTGCGGTGTAGTCGGCGCCC
	29	forest	plant	Rubus saxatilis	2020	EG2011_09	CAATACTGACCGGTACAGTGGGTCCGGACGTGATCGACGTACGCGGTCTGACCGCCACCGGCCGCTTCACATTTGACCCTGGCTTCATGTCCACGGCCTCTTGCGAGTCGAAGATCACCTACATTGATGGTGACAACGGAATTCTGCTGCACCGCGGCTACCCGATCGAACAACTGGCCGAGCAGTCCGATTACCTCGAGACCTGCTACCTGTTGCTCAACGGCGAGCTGCCAACCGCCGAACAGAAAGCCCAGTTCGTGGCCGTGGTCAAGAACCACACGATGGTTCACGAACAACTCAAGACCTTCTTCAACGGCTTTCGCCGTGACGCCCACCCGATGGCCGTCATGTGCGGTGTAGTCGGCGCCC
	29	forest	plant	Rubus saxatilis	2020	EG2011_10	CAATACTGACCGGTACAGTGGGTCCGGACGTGATCGACGTACGCGGTCTGACCGCCACCGGCCGCTTCACATTTGACCCTGGCTTCATGTCCACGGCCTCTTGCGAGTCGAAGATCACCTACATTGATGGTGACAACGGAATTCTGCTGCACCGCGGCTACCCGATCGAACAACTGGCCGAGCAGTCCGATTACCTCGAGACCTGCTACCTGTTGCTCAACGGCGAGCTGCCAACCGCCGAACAGAAAGCCCAGTTCGTGGCCGTGGTCAAGAACCACACGATGGTTCACGAACAACTCAAGACCTTCTTCAACGGCTTTCGCCGTGACGCCCACCCGATGGCCGTCATGTGCGGTGTAGTCGGCGCCC
	29	forest	plant	Rubus saxatilis	2020	EG2011_11	CAATACTGACCGGTACAGTGGGTCCGGACGTGATCGACGTACGCGGTCTGACCGCCACCGGCCGCTTCACATTTGACCCTGGCTTCATGTCCACGGCCTCTTGCGAGTCGAAGATCACCTACATTGATGGTGACAACGGAATTCTGCTGCACCGCGGCTACCCGATCGAACAACTGGCCGAGCAGTCCGATTACCTCGAGACCTGCTACCTGTTGCTCAACGGCGAGCTGCCAACCGCCGAACAGAAAGCCCAGTTCGTGGCCGTGGTCAAGAACCACACGATGGTTCACGAACAACTCAAGACCTTCTTCAACGGCTTTCGCCGTGACGCCCACCCGATGGCCGTCATGTGCGGTGTAGTCGGCGCCC
	29	forest	plant	Rubus saxatilis	2020	EG2011_12	CAATACTGACCGGTACAGTGGGTCCGGACGTGATCGACGTACGCGGTCTGACCGCCACCGGCCGCTTCACATTTGACCCTGGCTTCATGTCCACGGCCTCTTGCGAGTCGAAGATCACCTACATTGATGGTGACAACGGAATTCTGCTGCACCGCGGCTACCCGATCGAACAACTGGCCGAGCAGTCCGATTACCTCGAGACCTGCTACCTGTTGCTCAACGGCGAGCTGCCAACCGCCGAACAGAAAGCCCAGTTCGTGGCCGTGGTCAAGAACCACACGATGGTTCACGAACAACTCAAGACCTTCTTCAACGGCTTTCGCCGTGACGCCCACCCGATGGCCGTCATGTGCGGTGTAGTCGGCGCCC
	29	forest	plant	Rubus saxatilis	2020	EG2011_13	CAATACTGACCGGTACAGTGGGTCCGGACGTGATCGACGTACGCGGTCTGACCGCCACCGGCCGCTTCACATTTGACCCTGGCTTCATGTCCACGGCCTCTTGCGAGTCGAAGATCACCTACATTGATGGTGACAACGGAATTCTGCTGCACCGCGGCTACCCGATCGAACAACTGGCCGAGCAGTCCGATTACCTCGAGACCTGCTACCTGTTGCTCAACGGCGAGCTGCCAACCGCCGAACAGAAAGCCCAGTTCGTGGCCGTGGTCAAGAACCACACGATGGTTCACGAACAACTCAAGACCTTCTTCAACGGCTTTCGCCGTGACGCCCACCCGATGGCCGTCATGTGCGGTGTAGTCGGCGCCC
	29	forest	plant	Rubus saxatilis	2020	EG2011_14	CAATACTGACCGGTACAGTGGGTCCGGACGTGATCGACGTACGCGGTCTGACCGCCACCGGCCGCTTCACATTTGACCCTGGCTTCATGTCCACGGCCTCTTGCGAGTCGAAGATCACCTACATTGATGGTGACAACGGAATTCTGCTGCACCGCGGCTACCCGATCGAACAACTGGCCGAGCAGTCCGATTACCTCGAGACCTGCTACCTGTTGCTCAACGGCGAGCTGCCAACCGCCGAACAGAAAGCCCAGTTCGTGGCCGTGGTCAAGAACCACACGATGGTTCACGAACAACTCAAGACCTTCTTCAACGGCTTTCGCCGTGACGCCCACCCGATGGCCGTCATGTGCGGTGTAGTCGGCGCCC
	29	forest	plant	Rubus saxatilis	2020	EG2011_15	CAATACTGACCGGTACAGTGGGTCCGGACGTGATCGACGTACGCGGTCTGACCGCCACCGGCCGCTTCACATTTGACCCTGGCTTCATGTCCACGGCCTCTTGCGAGTCGAAGATCACCTACATTGATGGTGACAACGGAATTCTGCTGCACCGCGGCTACCCGATCGAACAACTGGCCGAGCAGTCCGATTACCTCGAGACCTGCTACCTGTTGCTCAACGGCGAGCTGCCAACCGCCGAACAGAAAGCCCAGTTCGTGGCCGTGGTCAAGAACCACACGATGGTTCACGAACAACTCAAGACCTTCTTCAACGGCTTTCGCCGTGACGCCCACCCGATGGCCGTCATGTGCGGTGTAGTCGGCGCCC
	29	forest	plant	Rubus saxatilis	2020	EG2011_16	CAATACTGACCGGTACAGTGGGTCCGGACGTGATCGACGTACGCGGTCTGACCGCCACCGGCCGCTTCACATTTGACCCTGGCTTCATGTCCACGGCCTCTTGCGAGTCGAAGATCACCTACATTGATGGTGACAACGGAATTCTGCTGCACCGCGGCTACCCGATCGAACAACTGGCCGAGCAGTCCGATTACCTCGAGACCTGCTACCTGTTGCTCAACGGCGAGCTGCCAACCGCCGAACAGAAAGCCCAGTTCGTGGCCGTGGTCAAGAACCACACGATGGTTCACGAACAACTCAAGACCTTCTTCAACGGCTTTCGCCGTGACGCCCACCCGATGGCCGTCATGTGCGGTGTAGTCGGCGCCC
	29	forest	plant	Rubus saxatilis	2020	EG2011_17	CAATACTGACCGGTACAGTGGGTCCGGACGTGATCGACGTACGCGGTCTGACCGCCACCGGCCGCTTCACATTTGACCCTGGCTTCATGTCCACGGCCTCTTGCGAGTCGAAGATCACCTACATTGATGGTGACAACGGAATTCTGCTGCACCGCGGCTACCCGATCGAACAACTGGCCGAGCAGTCCGATTACCTCGAGACCTGCTACCTGTTGCTCAACGGCGAGCTGCCAACCGCCGAACAGAAAGCCCAGTTCGTGGCCGTGGTCAAGAACCACACGATGGTTCACGAACAACTCAAGACCTTCTTCAACGGCTTTCGCCGTGACGCCCACCCGATGGCCGTCATGTGCGGTGTAGTCGGCGCCC
	29	forest	plant	Rubus saxatilis	2020	EG2011_18	CAATACTGACCGGTACAGTGGGTCCGGACGTGATCGACGTACGCGGTCTGACCGCCACCGGCCGCTTCACATTTGACCCTGGCTTCATGTCCACGGCCTCTTGCGAGTCGAAGATCACCTACATTGATGGTGACAACGGAATTCTGCTGCACCGCGGCTACCCGATCGAACAACTGGCCGAGCAGTCCGATTACCTCGAGACCTGCTACCTGTTGCTCAACGGCGAGCTGCCAACCGCCGAACAGAAAGCCCAGTTCGTGGCCGTGGTCAAGAACCACACGATGGTTCACGAACAACTCAAGACCTTCTTCAACGGCTTTCGCCGTGACGCCCACCCGATGGCCGTCATGTGCGGTGTAGTCGGCGCCC
	29	forest	plant	Rubus saxatilis	2020	EG2011_20	CAATACTGACCGGTACAGTGGGTCCGGACGTGATCGACGTACGCGGTCTGACCGCCACCGGCCGCTTCACATTTGACCCTGGCTTCATGTCCACGGCCTCTTGCGAGTCGAAGATCACCTACATTGATGGTGACAACGGAATTCTGCTGCACCGCGGCTACCCGATCGAACAACTGGCCGAGCAGTCCGATTACCTCGAGACCTGCTACCTGTTGCTCAACGGCGAGCTGCCAACCGCCGAACAGAAAGCCCAGTTCGTGGCCGTGGTCAAGAACCACACGATGGTTCACGAACAACTCAAGACCTTCTTCAACGGCTTTCGCCGTGACGCCCACCCGATGGCCGTCATGTGCGGTGTAGTCGGCGCCC
	29	forest	plant	Rubus saxatilis	2020	EG2011_21	CAATACTGACCGGTACAGTGGGTCCGGACGTGATCGACGTACGCGGTCTGACCGCCACCGGCCGCTTCACATTTGACCCTGGCTTCATGTCCACGGCCTCTTGCGAGTCGAAGATCACCTACATTGATGGTGACAACGGAATTCTGCTGCACCGCGGCTACCCGATCGAACAACTGGCCGAGCAGTCCGATTACCTCGAGACCTGCTACCTGTTGCTCAACGGCGAGCTGCCAACCGCCGAACAGAAAGCCCAGTTCGTGGCCGTGGTCAAGAACCACACGATGGTTCACGAACAACTCAAGACCTTCTTCAACGGCTTTCGCCGTGACGCCCACCCGATGGCCGTCATGTGCGGTGTAGTCGGCGCCC
	29	forest	plant	Rubus saxatilis	2020	EG2011_22	CAATACTGACCGGTACAGTGGGTCCGGACGTGATCGACGTACGCGGTCTGACCGCCACCGGCCGCTTCACATTTGACCCTGGCTTCATGTCCACGGCCTCTTGCGAGTCGAAGATCACCTACATTGATGGTGACAACGGAATTCTGCTGCACCGCGGCTACCCGATCGAACAACTGGCCGAGCAGTCCGATTACCTCGAGACCTGCTACCTGTTGCTCAACGGCGAGCTGCCAACCGCCGAACAGAAAGCCCAGTTCGTGGCCGTGGTCAAGAACCACACGATGGTTCACGAACAACTCAAGACCTTCTTCAACGGCTTTCGCCGTGACGCCCACCCGATGGCCGTCATGTGCGGTGTAGTCGGCGCCC
	29	forest	plant	Rubus saxatilis	2020	EG2011_23	CAATACTGACCGGTACAGTGGGTCCGGACGTGATCGACGTACGCGGTCTGACCGCCACCGGCCGCTTCACATTTGACCCTGGCTTCATGTCCACGGCCTCTTGCGAGTCGAAGATCACCTACATTGATGGTGACAACGGAATTCTGCTGCACCGCGGCTACCCGATCGAACAACTGGCCGAGCAGTCCGATTACCTCGAGACCTGCTACCTGTTGCTCAACGGCGAGCTGCCAACCGCCGAACAGAAAGCCCAGTTCGTGGCCGTGGTCAAGAACCACACGATGGTTCACGAACAACTCAAGACCTTCTTCAACGGCTTTCGCCGTGACGCCCACCCGATGGCCGTCATGTGCGGTGTAGTCGGCGCCC
	29	forest	plant	Rubus saxatilis	2020	EG2011_24	CAATACTGACCGGTACAGTGGGTCCGGACGTGATCGACGTACGCGGTCTGACCGCCACCGGCCGCTTCACATTTGACCCTGGCTTCATGTCCACGGCCTCTTGCGAGTCGAAGATCACCTACATTGATGGTGACAACGGAATTCTGCTGCACCGCGGCTACCCGATCGAACAACTGGCCGAGCAGTCCGATTACCTCGAGACCTGCTACCTGTTGCTCAACGGCGAGCTGCCAACCGCCGAACAGAAAGCCCAGTTCGTGGCCGTGGTCAAGAACCACACGATGGTTCACGAACAACTCAAGACCTTCTTCAACGGCTTTCGCCGTGACGCCCACCCGATGGCCGTCATGTGCGGTGTAGTCGGCGCCC
	29	forest	plant	Rubus saxatilis	2020	EG2011_25	CAATACTGACCGGTACAGTGGGTCCGGACGTGATCGACGTACGCGGTCTGACCGCCACCGGCCGCTTCACATTTGACCCTGGCTTCATGTCCACGGCCTCTTGCGAGTCGAAGATCACCTACATTGATGGTGACAACGGAATTCTGCTGCACCGCGGCTACCCGATCGAACAACTGGCCGAGCAGTCCGATTACCTCGAGACCTGCTACCTGTTGCTCAACGGCGAGCTGCCAACCGCCGAACAGAAAGCCCAGTTCGTGGCCGTGGTCAAGAACCACACGATGGTTCACGAACAACTCAAGACCTTCTTCAACGGCTTTCGCCGTGACGCCCACCCGATGGCCGTCATGTGCGGTGTAGTCGGCGCCC
	29	forest	plant	Rubus saxatilis	2020	EG2011_26	CAATACTGACCGGTACAGTGGGTCCGGACGTGATCGACGTACGCGGTCTGACCGCCACCGGCCGCTTCACATTTGACCCTGGCTTCATGTCCACGGCCTCTTGCGAGTCGAAGATCACCTACATTGATGGTGACAACGGAATTCTGCTGCACCGCGGCTACCCGATCGAACAACTGGCCGAGCAGTCCGATTACCTCGAGACCTGCTACCTGTTGCTCAACGGCGAGCTGCCAACCGCCGAACAGAAAGCCCAGTTCGTGGCCGTGGTCAAGAACCACACGATGGTTCACGAACAACTCAAGACCTTCTTCAACGGCTTTCGCCGTGACGCCCACCCGATGGCCGTCATGTGCGGTGTAGTCGGCGCCC
	29	forest	plant	Rubus saxatilis	2020	EG2011_27	CAATACTGACCGGTACAGTGGGTCCGGACGTGATCGACGTACGCGGTCTGACCGCCACCGGCCGCTTCACATTTGACCCTGGCTTCATGTCCACGGCCTCTTGCGAGTCGAAGATCACCTACATTGATGGTGACAACGGAATTCTGCTGCACCGCGGCTACCCGATCGAACAACTGGCCGAGCAGTCCGATTACCTCGAGACCTGCTACCTGTTGCTCAACGGCGAGCTGCCAACCGCCGAACAGAAAGCCCAGTTCGTGGCCGTGGTCAAGAACCACACGATGGTTCACGAACAACTCAAGACCTTCTTCAACGGCTTTCGCCGTGACGCCCACCCGATGGCCGTCATGTGCGGTGTAGTCGGCGCCC
	29	forest	plant	Rubus saxatilis	2020	EG2011_28	CAATACTGACCGGTACAGTGGGTCCGGACGTGATCGACGTACGCGGTCTGACCGCCACCGGCCGCTTCACATTTGACCCTGGCTTCATGTCCACGGCCTCTTGCGAGTCGAAGATCACCTACATTGATGGTGACAACGGAATTCTGCTGCACCGCGGCTACCCGATCGAACAACTGGCCGAGCAGTCCGATTACCTCGAGACCTGCTACCTGTTGCTCAACGGCGAGCTGCCAACCGCCGAACAGAAAGCCCAGTTCGTGGCCGTGGTCAAGAACCACACGATGGTTCACGAACAACTCAAGACCTTCTTCAACGGCTTTCGCCGTGACGCCCACCCGATGGCCGTCATGTGCGGTGTAGTCGGCGCCC
	29	forest	plant	Rubus saxatilis	2020	EG2011_29	CAATACTGACCGGTACAGTGGGTCCGGACGTGATCGACGTACGCGGTCTGACCGCCACCGGCCGCTTCACATTTGACCCTGGCTTCATGTCCACGGCCTCTTGCGAGTCGAAGATCACCTACATTGATGGTGACAACGGAATTCTGCTGCACCGCGGCTACCCGATCGAACAACTGGCCGAGCAGTCCGATTACCTCGAGACCTGCTACCTGTTGCTCAACGGCGAGCTGCCAACCGCCGAACAGAAAGCCCAGTTCGTGGCCGTGGTCAAGAACCACACGATGGTTCACGAACAACTCAAGACCTTCTTCAACGGCTTTCGCCGTGACGCCCACCCGATGGCCGTCATGTGCGGTGTAGTCGGCGCCC
	29	forest	plant	Rubus saxatilis	2020	EG2011_30	CAATACTGACCGGTACAGTGGGTCCGGACGTGATCGACGTACGCGGTCTGACCGCCACCGGCCGCTTCACATTTGACCCTGGCTTCATGTCCACGGCCTCTTGCGAGTCGAAGATCACCTACATTGATGGTGACAACGGAATTCTGCTGCACCGCGGCTACCCGATCGAACAACTGGCCGAGCAGTCCGATTACCTCGAGACCTGCTACCTGTTGCTCAACGGCGAGCTGCCAACCGCCGAACAGAAAGCCCAGTTCGTGGCCGTGGTCAAGAACCACACGATGGTTCACGAACAACTCAAGACCTTCTTCAACGGCTTTCGCCGTGACGCCCACCCGATGGCCGTCATGTGCGGTGTAGTCGGCGCCC
	29	forest	moss	Rhytidiadelphus loreus	2020	EG2012_02	CAATACTGACCGGTACAGTGGGTCCGGACGTGATCGACGTACGCGGTCTGACCGCCACCGGCCGCTTCACATTTGACCCTGGCTTCATGTCCACGGCCTCTTGCGAGTCGAAGATCACCTACATTGATGGTGACAACGGAATTCTGCTGCACCGCGGCTACCCGATCGAACAACTGGCCGAGCAGTCCGATTACCTCGAGACCTGCTACCTGTTGCTCAACGGCGAGCTGCCAACCGCCGAACAGAAAGCCCAGTTCGTGGCCGTGGTCAAGAACCACACGATGGTTCACGAACAACTCAAGACCTTCTTCAACGGCTTTCGCCGTGACGCCCACCCGATGGCCGTCATGTGCGGTGTAGTCGGCGCCC
	29	forest	moss	Rhytidiadelphus loreus	2020	EG2012_03	CAATACTGACCGGTACAGTGGGTCCGGACGTGATCGACGTACGCGGTCTGACCGCCACCGGCCGCTTCACATTTGACCCTGGCTTCATGTCCACGGCCTCTTGCGAGTCGAAGATCACCTACATTGATGGTGACAACGGAATTCTGCTGCACCGCGGCTACCCGATCGAACAACTGGCCGAGCAGTCCGATTACCTCGAGACCTGCTACCTGTTGCTCAACGGCGAGCTGCCAACCGCCGAACAGAAAGCCCAGTTCGTGGCCGTGGTCAAGAACCACACGATGGTTCACGAACAACTCAAGACCTTCTTCAACGGCTTTCGCCGTGACGCCCACCCGATGGCCGTCATGTGCGGTGTAGTCGGCGCCC
	29	forest	moss	Rhytidiadelphus loreus	2020	EG2012_04	CAATACTGACCGGTACAGTGGGTCCGGACGTGATCGACGTACGCGGTCTGACCGCCACCGGCCGCTTCACATTTGACCCTGGCTTCATGTCCACGGCCTCTTGCGAGTCGAAGATCACCTACATTGATGGTGACAACGGAATTCTGCTGCACCGCGGCTACCCGATCGAACAACTGGCCGAGCAGTCCGATTACCTCGAGACCTGCTACCTGTTGCTCAACGGCGAGCTGCCAACCGCCGAACAGAAAGCCCAGTTCGTGGCCGTGGTCAAGAACCACACGATGGTTCACGAACAACTCAAGACCTTCTTCAACGGCTTTCGCCGTGACGCCCACCCGATGGCCGTCATGTGCGGTGTAGTCGGCGCCC
	29	forest	moss	Rhytidiadelphus loreus	2020	EG2012_05	CAATACTGACCGGTACAGTGGGTCCGGACGTGATCGACGTACGCGGTCTGACCGCCACCGGCCGCTTCACATTTGACCCTGGCTTCATGTCCACGGCCTCTTGCGAGTCGAAGATCACCTACATTGATGGTGACAACGGAATTCTGCTGCACCGCGGCTACCCGATCGAACAACTGGCCGAGCAGTCCGATTACCTCGAGACCTGCTACCTGTTGCTCAACGGCGAGCTGCCAACCGCCGAACAGAAAGCCCAGTTCGTGGCCGTGGTCAAGAACCACACGATGGTTCACGAACAACTCAAGACCTTCTTCAACGGCTTTCGCCGTGACGCCCACCCGATGGCCGTCATGTGCGGTGTAGTCGGCGCCC
	29	forest	moss	Rhytidiadelphus loreus	2020	EG2012_06	CAATACTGACCGGTACAGTGGGTCCGGACGTGATCGACGTACGCGGTCTGACCGCCACCGGCCGCTTCACATTTGACCCTGGCTTCATGTCCACGGCCTCTTGCGAGTCGAAGATCACCTACATTGATGGTGACAACGGAATTCTGCTGCACCGCGGCTACCCGATCGAACAACTGGCCGAGCAGTCCGATTACCTCGAGACCTGCTACCTGTTGCTCAACGGCGAGCTGCCAACCGCCGAACAGAAAGCCCAGTTCGTGGCCGTGGTCAAGAACCACACGATGGTTCACGAACAACTCAAGACCTTCTTCAACGGCTTTCGCCGTGACGCCCACCCGATGGCCGTCATGTGCGGTGTAGTCGGCGCCC
	29	forest	moss	Rhytidiadelphus loreus	2020	EG2012_07	CAATACTGACCGGTACAGTGGGTCCGGACGTGATCGACGTACGCGGTCTGACCGCCACCGGCCGCTTCACATTTGACCCTGGCTTCATGTCCACGGCCTCTTGCGAGTCGAAGATCACCTACATTGATGGTGACAACGGAATTCTGCTGCACCGCGGCTACCCGATCGAACAACTGGCCGAGCAGTCCGATTACCTCGAGACCTGCTACCTGTTGCTCAACGGCGAGCTGCCAACCGCCGAACAGAAAGCCCAGTTCGTGGCCGTGGTCAAGAACCACACGATGGTTCACGAACAACTCAAGACCTTCTTCAACGGCTTTCGCCGTGACGCCCACCCGATGGCCGTCATGTGCGGTGTAGTCGGCGCCC
	29	forest	moss	Rhytidiadelphus loreus	2020	EG2012_08	CAATACTGACCGGTACAGTGGGTCCGGACGTGATCGACGTACGCGGTCTGACCGCCACCGGCCGCTTCACATTTGACCCTGGCTTCATGTCCACGGCCTCTTGCGAGTCGAAGATCACCTACATTGATGGTGACAACGGAATTCTGCTGCACCGCGGCTACCCGATCGAACAACTGGCCGAGCAGTCCGATTACCTCGAGACCTGCTACCTGTTGCTCAACGGCGAGCTGCCAACCGCCGAACAGAAAGCCCAGTTCGTGGCCGTGGTCAAGAACCACACGATGGTTCACGAACAACTCAAGACCTTCTTCAACGGCTTTCGCCGTGACGCCCACCCGATGGCCGTCATGTGCGGTGTAGTCGGCGCCC
	29	forest	moss	Rhytidiadelphus loreus	2020	EG2012_09	CAATACTGACCGGTACAGTGGGTCCGGACGTGATCGACGTACGCGGTCTGACCGCCACCGGCCGCTTCACATTTGACCCTGGCTTCATGTCCACGGCCTCTTGCGAGTCGAAGATCACCTACATTGATGGTGACAACGGAATTCTGCTGCACCGCGGCTACCCGATCGAACAACTGGCCGAGCAGTCCGATTACCTCGAGACCTGCTACCTGTTGCTCAACGGCGAGCTGCCAACCGCCGAACAGAAAGCCCAGTTCGTGGCCGTGGTCAAGAACCACACGATGGTTCACGAACAACTCAAGACCTTCTTCAACGGCTTTCGCCGTGACGCCCACCCGATGGCCGTCATGTGCGGTGTAGTCGGCGCCC
	29	forest	moss	Rhytidiadelphus loreus	2020	EG2012_10	CAATACTGACCGGTACAGTGGGTCCGGACGTGATCGACGTACGCGGTCTGACCGCCACCGGCCGCTTCACATTTGACCCTGGCTTCATGTCCACGGCCTCTTGCGAGTCGAAGATCACCTACATTGATGGTGACAACGGAATTCTGCTGCACCGCGGCTACCCGATCGAACAACTGGCCGAGCAGTCCGATTACCTCGAGACCTGCTACCTGTTGCTCAACGGCGAGCTGCCAACCGCCGAACAGAAAGCCCAGTTCGTGGCCGTGGTCAAGAACCACACGATGGTTCACGAACAACTCAAGACCTTCTTCAACGGCTTTCGCCGTGACGCCCACCCGATGGCCGTCATGTGCGGTGTAGTCGGCGCCC
	29	forest	moss	Rhytidiadelphus loreus	2020	EG2012_11	CAATACTGACCGGTACAGTGGGTCCGGACGTGATCGACGTACGCGGTCTGACCGCCACCGGCCGCTTCACATTTGACCCTGGCTTCATGTCCACGGCCTCTTGCGAGTCGAAGATCACCTACATTGATGGTGACAACGGAATTCTGCTGCACCGCGGCTACCCGATCGAACAACTGGCCGAGCAGTCCGATTACCTCGAGACCTGCTACCTGTTGCTCAACGGCGAGCTGCCAACCGCCGAACAGAAAGCCCAGTTCGTGGCCGTGGTCAAGAACCACACGATGGTTCACGAACAACTCAAGACCTTCTTCAACGGCTTTCGCCGTGACGCCCACCCGATGGCCGTCATGTGCGGTGTAGTCGGCGCCC
	29	forest	moss	Rhytidiadelphus loreus	2020	EG2012_12	CAATACTGACCGGTACAGTGGGTCCGGACGTGATCGACGTACGCGGTCTGACCGCCACCGGCCGCTTCACATTTGACCCTGGCTTCATGTCCACGGCCTCTTGCGAGTCGAAGATCACCTACATTGATGGTGACAACGGAATTCTGCTGCACCGCGGCTACCCGATCGAACAACTGGCCGAGCAGTCCGATTACCTCGAGACCTGCTACCTGTTGCTCAACGGCGAGCTGCCAACCGCCGAACAGAAAGCCCAGTTCGTGGCCGTGGTCAAGAACCACACGATGGTTCACGAACAACTCAAGACCTTCTTCAACGGCTTTCGCCGTGACGCCCCACCCGATGGCCGTCATGTGCGGTGTAGTCGGCGCCC
	29	forest	moss	Rhytidiadelphus loreus	2020	EG2012_13	CAATACTGACCGGTACAGTGGGTCCGGACGTGATCGACGTACGCGGTCTGACCGCCACCGGCCGCTTCACATTTGACCCTGGCTTCATGTCCACGGCCTCTTGCGAGTCGAAGATCACCTACATTGATGGTGACAACGGAATTCTGCTGCACCGCGGCTACCCGATCGAACAACTGGCCGAGCAGTCCGATTACCTCGAGACCTGCTACCTGTTGCTCAACGGCGAGCTGCCAACCGCCGAACAGAAAGCCCAGTTCGTGGCCGTGGTCAAGAACCACACGATGGTTCACGAACAACTCAAGACCTTCTTCAACGGCTTTCGCCGTGACGCCCACCCGATGGCCGTCATGTGCGGTGTAGTCGGCGCCC
	29	forest	moss	Rhytidiadelphus loreus	2020	EG2012_14	CAATACTGACCGGTACAGTGGGTCCGGACGTGATCGACGTACGCGGTCTGACCGCCACCGGCCGCTTCACATTTGACCCTGGCTTCATGTCCACGGCCTCTTGCGAGTCGAAGATCACCTACATTGATGGTGACAACGGAATTCTGCTGCACCGCGGCTACCCGATCGAACAACTGGCCGAGCAGTCCGATTACCTCGAGACCTGCTACCTGTTGCTCAACGGCGAGCTGCCAACCGCCGAACAGAAAGCCCAGTTCGTGGCCGTGGTCAAGAACCACACGATGGTTCACGAACAACTCAAGACCTTCTTCAACGGCTTTCGCCGTGACGCCCACCCGATGGCCGTCATGTGCGGTGTAGTCGGCGCCC
	29	forest	moss	Rhytidiadelphus loreus	2020	EG2012_15	CAATACTGACCGGTACAGTGGGTCCGGACGTGATCGACGTACGCGGTCTGACCGCCACCGGCCGCTTCACATTTGACCCTGGCTTCATGTCCACGGCCTCTTGCGAGTCGAAGATCACCTACATTGATGGTGACAACGGAATTCTGCTGCACCGCGGCTACCCGATCGAACAACTGGCCGAGCAGTCCGATTACCTCGAGACCTGCTACCTGTTGCTCAACGGCGAGCTGCCAACCGCCGAACAGAAAGCCCAGTTCGTGGCCGTGGTCAAGAACCACACGATGGTTCACGAACAACTCAAGACCTTCTTCAACGGCTTTCGCCGTGACGCCCACCCGATGGCCGTCATGTGCGGTGTAGTCGGCGCCC
	29	forest	moss	Rhytidiadelphus loreus	2020	EG2012_16	CAATACTGACCGGTACAGTGGGTCCGGACGTGATCGACGTACGCGGTCTGACCGCCACCGGCCGCTTCACATTTGACCCTGGCTTCATGTCCACGGCCTCTTGCGAGTCGAAGATCACCTACATTGATGGTGACAACGGAATTCTGCTGCACCGCGGCTACCCGATCGAACAACTGGCCGAGCAGTCCGATTACCTCGAGACCTGCTACCTGTTGCTCAACGGCGAGCTGCCAACCGCCGAACAGAAAGCCCAGTTCGTGGCCGTGGTCAAGAACCACACGATGGTTCACGAACAACTCAAGACCTTCTTCAACGGCTTTCGCCGTGACGCCCACCCGATGGCCGTCATGTGCGGTGTAGTCGGCGCCC
	29	forest	moss	Rhytidiadelphus loreus	2020	EG2012_17	CAATACTGACCGGTACAGTGGGTCCGGACGTGATCGACGTACGCGGTCTGACCGCCACCGGCCGCTTCACATTTGACCCTGGCTTCATGTCCACGGCCTCTTGCGAGTCGAAGATCACCTACATTGATGGTGACAACGGAATTCTGCTGCACCGCGGCTACCCGATCGAACAACTGGCCGAGCAGTCCGATTACCTCGAGACCTGCTACCTGTTGCTCAACGGCGAGCTGCCAACCGCCGAACAGAAAGCCCAGTTCGTGGCCGTGGTCAAGAACCACACGATGGTTCACGAACAACTCAAGACCTTCTTCAACGGCTTTCGCCGTGACGCCCACCCGATGGCCGTCATGTGCGGTGTAGTCGGCGCCC
	29	forest	moss	Rhytidiadelphus loreus	2020	EG2012_18	CAATACTGACCGGTACAGTGGGTCCGGACGTGATCGACGTACGCGGTCTGACCGCCACCGGCCGCTTCACATTTGACCCTGGCTTCATGTCCACGGCCTCTTGCGAGTCGAAGATCACCTACATTGATGGTGACAACGGAATTCTGCTGCACCGCGGCTACCCGATCGAACAACTGGCCGAGCAGTCCGATTACCTCGAGACCTGCTACCTGTTGCTCAACGGCGAGCTGCCAACCGCCGAACAGAAAGCCCAGTTCGTGGCCGTGGTCAAGAACCACACGATGGTTCACGAACAACTCAAGACCTTCTTCAACGGCTTTCGCCGTGACGCCCACCCGATGGCCGTCATGTGCGGTGTAGTCGGCGCCC
	29	forest	moss	Rhytidiadelphus loreus	2020	EG2012_19	CAATACTGACCGGTACAGTGGGTCCGGACGTGATCGACGTACGCGGTCTGACCGCCACCGGCCGCTTCACATTTGACCCTGGCTTCATGTCCACGGCCTCTTGCGAGTCGAAGATCACCTACATTGATGGTGACAACGGAATTCTGCTGCACCGCGGCTACCCGATCGAACAACTGGCCGAGCAGTCCGATTACCTCGAGACCTGCTACCTGTTGCTCAACGGCGAGCTGCCAACCGCCGAACAGAAAGCCCAGTTCGTGGCCGTGGTCAAGAACCACACGATGGTTCACGAACAACTCAAGACCTTCTTCAACGGCTTTCGCCGTGACGCCCACCCGATGGCCGTCATGTGCGGTGTAGTCGGCGCCC
	29	forest	moss	Rhytidiadelphus loreus	2020	EG2012_20	CAATACTGACCGGTACAGTGGGTCCGGACGTGATCGACGTACGCGGTCTGACCGCCACCGGCCGCTTCACATTTGACCCTGGCTTCATGTCCACGGCCTCTTGCGAGTCGAAGATCACCTACATTGATGGTGACAACGGAATTCTGCTGCACCGCGGCTACCCGATCGAACAACTGGCCGAGCAGTCCGATTACCTCGAGACCTGCTACCTGTTGCTCAACGGCGAGCTGCCAACCGCCGAACAGAAAGCCCAGTTCGTGGCCGTGGTCAAGAACCACACGATGGTTCACGAACAACTCAAGACCTTCTTCAACGGCTTTCGCCGTGACGCCCACCCGATGGCCGTCATGTGCGGTGTAGTCGGCGCCC
	29	forest	moss	Rhytidiadelphus loreus	2020	EG2012_21	CAATACTGACCGGTACAGTGGGTCCGGACGTGATCGACGTACGCGGTCTGACCGCCACCGGCCGCTTCACATTTGACCCTGGCTTCATGTCCACGGCCTCTTGCGAGTCGAAGATCACCTACATTGATGGTGACAACGGAATTCTGCTGCACCGCGGCTACCCGATCGAACAACTGGCCGAGCAGTCCGATTACCTCGAGACCTGCTACCTGTTGCTCAACGGCGAGCTGCCAACCGCCGAACAGAAAGCCCAGTTCGTGGCCGTGGTCAAGAACCACACGATGGTTCACGAACAACTCAAGACCTTCTTCAACGGCTTTCGCCGTGACGCCCACCCGATGGCCGTCATGTGCGGTGTAGTCGGCGCCC
	29	forest	moss	Rhytidiadelphus loreus	2020	EG2012_22	CAATACTGACCGGTACAGTGGGTCCGGACGTGATCGACGTACGCGGTCTGACCGCCACCGGCCGCTTCACATTTGACCCTGGCTTCATGTCCACGGCCTCTTGCGAGTCGAAGATCACCTACATTGATGGTGACAACGGAATTCTGCTGCACCGCGGCTACCCGATCGAACAACTGGCCGAGCAGTCCGATTACCTCGAGACCTGCTACCTGTTGCTCAACGGCGAGCTGCCAACCGCCGAACAGAAAGCCCAGTTCGTGGCCGTGGTCAAGAACCACACGATGGTTCACGAACAACTCAAGACCTTCTTCAACGGCTTTCGCCGTGACGCCCACCCGATGGCCGTCATGTGCGGTGTAGTCGGCGCCC
	29	forest	moss	Rhytidiadelphus loreus	2020	EG2012_23	CAATACTGACCGGTACAGTGGGTCCGGACGTGATCGACGTACGCGGTCTGACCGCCACCGGCCGCTTCACATTTGACCCTGGCTTCATGTCCACGGCCTCTTGCGAGTCGAAGATCACCTACATTGATGGTGACAACGGAATTCTGCTGCACCGCGGCTACCCGATCGAACAACTGGCCGAGCAGTCCGATTACCTCGAGACCTGCTACCTGTTGCTCAACGGCGAGCTGCCAACCGCCGAACAGAAAGCCCAGTTCGTGGCCGTGGTCAAGAACCACACGATGGTTCACGAACAACTCAAGACCTTCTTCAACGGCTTTCGCCGTGACGCCCACCCGATGGCCGTCATGTGCGGTGTAGTCGGCGCCC
	29	forest	moss	Rhytidiadelphus loreus	2020	EG2012_24	CAATACTGACCGGTACAGTGGGTCCGGACGTGATCGACGTACGCGGTCTGACCGCCACCGGCCGCTTCACATTTGACCCTGGCTTCATGTCCACGGCCTCTTGCGAGTCGAAGATCACCTACATTGATGGTGACAACGGAATTCTGCTGCACCGCGGCTACCCGATCGAACAACTGGCCGAGCAGTCCGATTACCTCGAGACCTGCTACCTGTTGCTCAACGGCGAGCTGCCAACCGCCGAACAGAAAGCCCAGTTCGTGGCCGTGGTCAAGAACCACACGATGGTTCACGAACAACTCAAGACCTTCTTCAACGGCTTTCGCCGTGACGCCCACCCGATGGCCGTCATGTGCGGTGTAGTCGGCGCCC
	29	forest	moss	Rhytidiadelphus loreus	2020	EG2012_25	CAATACTGACCGGTACAGTGGGTCCGGACGTGATCGACGTACGCGGTCTGACCGCCACCGGCCGCTTCACATTTGACCCTGGCTTCATGTCCACGGCCTCTTGCGAGTCGAAGATCACCTACATTGATGGTGACAACGGAATTCTGCTGCACCGCGGCTACCCGATCGAACAACTGGCCGAGCAGTCCGATTACCTCGAGACCTGCTACCTGTTGCTCAACGGCGAGCTGCCAACCGCCGAACAGAAAGCCCAGTTCGTGGCCGTGGTCAAGAACCACACGATGGTTCACGAACAACTCAAGACCTTCTTCAACGGCTTTCGCCGTGACGCCCACCCGATGGCCGTCATGTGCGGTGTAGTCGGCGCCC
	29	forest	moss	Rhytidiadelphus loreus	2020	EG2012_27	CAATACTGACCGGTACAGTGGGTCCGGACGTGATCGACGTACGCGGTCTGACCGCCACCGGCCGCTTCACATTTGACCCTGGCTTCATGTCCACGGCCTCTTGCGAGTCGAAGATCACCTACATTGATGGTGACAACGGAATTCTGCTGCACCGCGGCTACCCGATCGAACAACTGGCCGAGCAGTCCGATTACCTCGAGACCTGCTACCTGTTGCTCAACGGCGAGCTGCCAACCGCCGAACAGAAAGCCCAGTTCGTGGCCGTGGTCAAGAACCACACGATGGTTCACGAACAACTCAAGACCTTCTTCAACGGCTTTCGCCGTGACGCCCACCCGATGGCCGTCATGTGCGGTGTAGTCGGCGCCC
	29	forest	moss	Rhytidiadelphus loreus	2020	EG2012_28	CAATACTGACCGGTACAGTGGGTCCGGACGTGATCGACGTACGCGGTCTGACCGCCACCGGCCGCTTCACATTTGACCCTGGCTTCATGTCCACGGCCTCTTGCGAGTCGAAGATCACCTACATTGATGGTGACAACGGAATTCTGCTGCACCGCGGCTACCCGATCGAACAACTGGCCGAGCAGTCCGATTACCTCGAGACCTGCTACCTGTTGCTCAACGGCGAGCTGCCAACCGCCGAACAGAAAGCCCAGTTCGTGGCCGTGGTCAAGAACCACACGATGGTTCACGAACAACTCAAGACCTTCTTCAACGGCTTTCGCCGTGACGCCCACCCGATGGCCGTCATGTGCGGTGTAGTCGGCGCCC
	29	forest	moss	Rhytidiadelphus loreus	2020	EG2012_29	CAATACTGACCGGTACAGTGGGTCCGGACGTGATCGACGTACGCGGTCTGACCGCCACCGGCCGCTTCACATTTGACCCTGGCTTCATGTCCACGGCCTCTTGCGAGTCGAAGATCACCTACATTGATGGTGACAACGGAATTCTGCTGCACCGCGGCTACCCGATCGAACAACTGGCCGAGCAGTCCGATTACCTCGAGACCTGCTACCTGTTGCTCAACGGCGAGCTGCCAACCGCCGAACAGAAAGCCCAGTTCGTGGCCGTGGTCAAGAACCACACGATGGTTCACGAACAACTCAAGACCTTCTTCAACGGCTTTCGCCGTGACGCCCACCCGATGGCCGTCATGTGCGGTGTAGTCGGCGCCC
	29	forest	plant	Salix arctica	2020	EG2015_04	CAATACTGACCGGTACAGTGGGTCCGGACGTGATCGACGTACGCGGTCTGACCGCCACCGGCCGCTTCACATTTGACCCTGGCTTCATGTCCACGGCCTCTTGCGAGTCGAAGATCACCTACATTGATGGTGACAACGGAATTCTGCTGCACCGCGGCTACCCGATCGAACAACTGGCCGAGCAGTCCGATTACCTCGAGACCTGCTACCTGTTGCTCAACGGCGAGCTGCCAACCGCCGAACAGAAAGCCCAGTTCGTGGCCGTGGTCAAGAACCACACGATGGTTCACGAACAACTCAAGACCTTCTTCAACGGCTTTCGCCGTGACGCCCACCCGATGGCCGTCATGTGCGGTGTAGTCGGCGCCC
	29	forest	plant	Salix arctica	2020	EG2015_05	CAATACTGACCGGTACAGTGGGTCCGGACGTGATCGACGTACGCGGTCTGACCGCCACCGGCCGCTTCACATTTGACCCTGGCTTCATGTCCACGGCCTCTTGCGAGTCGAAGATCACCTACATTGATGGTGACAACGGAATTCTGCTGCACCGCGGCTACCCGATCGAACAACTGGCCGAGCAGTCCGATTACCTCGAGACCTGCTACCTGTTGCTCAACGGCGAGCTGCCAACCGCCGAACAGAAAGCCCAGTTCGTGGCCGTGGTCAAGAACCACACGATGGTTCACGAACAACTCAAGACCTTCTTCAACGGCTTTCGCCGTGACGCCCACCCGATGGCCGTCATGTGCGGTGTAGTCGGCGCCC
	29	forest	plant	Salix arctica	2020	EG2015_06	CAATACTGACCGGTACAGTGGGTCCGGACGTGATCGACGTACGCGGTCTGACCGCCACCGGCCGCTTCACATTTGACCCTGGCTTCATGTCCACGGCCTCTTGCGAGTCGAAGATCACCTACATTGATGGTGACAACGGAATTCTGCTGCACCGCGGCTACCCGATCGAACAACTGGCCGAGCAGTCCGATTACCTCGAGACCTGCTACCTGTTGCTCAACGGCGAGCTGCCAACCGCCGAACAGAAAGCCCAGTTCGTGGCCGTGGTCAAGAACCACACGATGGTTCACGAACAACTCAAGACCTTCTTCAACGGCTTTCGCCGTGACGCCCACCCGATGGCCGTCATGTGCGGTGTAGTCGGCGCCC
	29	forest	plant	Salix arctica	2020	EG2015_07	CAATACTGACCGGTACAGTGGGTCCGGACGTGATCGACGTACGCGGTCTGACCGCCACCGGCCGCTTCACATTTGACCCTGGCTTCATGTCCACGGCCTCTTGCGAGTCGAAGATCACCTACATTGATGGTGACAACGGAATTCTGCTGCACCGCGGCTACCCGATCGAACAACTGGCCGAGCAGTCCGATTACCTCGAGACCTGCTACCTGTTGCTCAACGGCGAGCTGCCAACCGCCGAACAGAAAGCCCAGTTCGTGGCCGTGGTCAAGAACCACACGATGGTTCACGAACAACTCAAGACCTTCTTCAACGGCTTTCGCCGTGACGCCCACCCGATGGCCGTCATGTGCGGTGTAGTCGGCGCCC
	29	forest	plant	Salix arctica	2020	EG2015_09	CAATACTGACCGGTACAGTGGGTCCGGACGTGATCGACGTACGCGGTCTGACCGCCACCGGCCGCTTCACATTTGACCCTGGCTTCATGTCCACGGCCTCTTGCGAGTCGAAGATCACCTACATTGATGGTGACAACGGAATTCTGCTGCACCGCGGCTACCCGATCGAACAACTGGCCGAGCAGTCCGATTACCTCGAGACCTGCTACCTGTTGCTCAACGGCGAGCTGCCAACCGCCGAACAGAAAGCCCAGTTCGTGGCCGTGGTCAAGAACCACACGATGGTTCACGAACAACTCAAGACCTTCTTCAACGGCTTTCGCCGTGACGCCCACCCGATGGCCGTCATGTGCGGTGTAGTCGGCGCCC
	29	forest	plant	Salix arctica	2020	EG2015_11	CAATACTGACCGGTACAGTGGGTCCGGACGTGATCGACGTACGCGGTCTGACCGCCACCGGCCGCTTCACATTTGACCCTGGCTTCATGTCCACGGCCTCTTGCGAGTCGAAGATCACCTACATTGATGGTGACAACGGAATTCTGCTGCACCGCGGCTACCCGATCGAACAACTGGCCGAGCAGTCCGATTACCTCGAGACCTGCTACCTGTTGCTCAACGGCGAGCTGCCAACCGCCGAACAGAAAGCCCAGTTCGTGGCCGTGGTCAAGAACCACACGATGGTTCACGAACAACTCAAGACCTTCTTCAACGGCTTTCGCCGTGACGCCCACCCGATGGCCGTCATGTGCGGTGTAGTCGGCGCCC
	29	forest	plant	Salix arctica	2020	EG2015_12	CAATACTGACCGGTACAGTGGGTCCGGACGTGATCGACGTACGCGGTCTGACCGCCACCGGCCGCTTCACATTTGACCCTGGCTTCATGTCCACGGCCTCTTGCGAGTCGAAGATCACCTACATTGATGGTGACAACGGAATTCTGCTGCACCGCGGCTACCCGATCGAACAACTGGCCGAGCAGTCCGATTACCTCGAGACCTGCTACCTGTTGCTCAACGGCGAGCTGCCAACCGCCGAACAGAAAGCCCAGTTCGTGGCCGTGGTCAAGAACCACACGATGGTTCACGAACAACTCAAGACCTTCTTCAACGGCTTTCGCCGTGACGCCCACCCGATGGCCGTCATGTGCGGTGTAGTCGGCGCCC
	29	forest	moss	Rhytidiadelphus squarrosus	2020	EG2016_01	CAATACTGACCGGTACAGTGGGTCCGGACGTGATCGACGTACGCGGTCTGACCGCCACCGGCCGCTTCACATTTGACCCTGGCTTCATGTCCACGGCCTCTTGCGAGTCGAAGATCACCTACATTGATGGTGACAACGGAATTCTGCTGCACCGCGGCTACCCGATCGAACAACTGGCCGAGCAGTCCGATTACCTCGAGACCTGCTACCTGTTGCTCAACGGCGAGCTGCCAACCGCCGAACAGAAAGCCCAGTTCGTGGCCGTGGTCAAGAACCACACGATGGTTCACGAACAACTCAAGACCTTCTTCAACGGCTTTCGCCGTGACGCCCACCCGATGGCCGTCATGTGCGGTGTAGTCGGCGCCC
	29	forest	moss	Rhytidiadelphus squarrosus	2020	EG2016_02	CAATACTGACCGGTACAGTGGGTCCGGACGTGATCGACGTACGCGGTCTGACCGCCACCGGCCGCTTCACATTTGACCCTGGCTTCATGTCCACGGCCTCTTGCGAGTCGAAGATCACCTACATTGATGGTGACAACGGAATTCTGCTGCACCGCGGCTACCCGATCGAACAACTGGCCGAGCAGTCCGATTACCTCGAGACCTGCTACCTGTTGCTCAACGGCGAGCTGCCAACCGCCGAACAGAAAGCCCAGTTCGTGGCCGTGGTCAAGAACCACACGATGGTTCACGAACAACTCAAGACCTTCTTCAACGGCTTTCGCCGTGACGCCCACCCGATGGCCGTCATGTGCGGTGTAGTCGGCGCCC
	29	forest	moss	Rhytidiadelphus squarrosus	2020	EG2016_03	CAATACTGACCGGTACAGTGGGTCCGGACGTGATCGACGTACGCGGTCTGACCGCCACCGGCCGCTTCACATTTGACCCTGGCTTCATGTCCACGGCCTCTTGCGAGTCGAAGATCACCTACATTGATGGTGACAACGGAATTCTGCTGCACCGCGGCTACCCGATCGAACAACTGGCCGAGCAGTCCGATTACCTCGAGACCTGCTACCTGTTGCTCAACGGCGAGCTGCCAACCGCCGAACAGAAAGCCCAGTTCGTGGCCGTGGTCAAGAACCACACGATGGTTCACGAACAACTCAAGACCTTCTTCAACGGCTTTCGCCGTGACGCCCACCCGATGGCCGTCATGTGCGGTGTAGTCGGCGCCC
	29	forest	moss	Rhytidiadelphus squarrosus	2020	EG2016_04	CAATACTGACCGGTACAGTGGGTCCGGACGTGATCGACGTACGCGGTCTGACCGCCACCGGCCGCTTCACATTTGACCCTGGCTTCATGTCCACGGCCTCTTGCGAGTCGAAGATCACCTACATTGATGGTGACAACGGAATTCTGCTGCACCGCGGCTACCCGATCGAACAACTGGCCGAGCAGTCCGATTACCTCGAGACCTGCTACCTGTTGCTCAACGGCGAGCTGCCAACCGCCGAACAGAAAGCCCAGTTCGTGGCCGTGGTCAAGAACCACACGATGGTTCACGAACAACTCAAGACCTTCTTCAACGGCTTTCGCCGTGACGCCCACCCGATGGCCGTCATGTGCGGTGTAGTCGGCGCCC
	29	forest	moss	Rhytidiadelphus squarrosus	2020	EG2016_05	CAATACTGACCGGTACAGTGGGTCCGGACGTGATCGACGTACGCGGTCTGACCGCCACCGGCCGCTTCACATTTGACCCTGGCTTCATGTCCACGGCCTCTTGCGAGTCGAAGATCACCTACATTGATGGTGACAACGGAATTCTGCTGCACCGCGGCTACCCGATCGAACAACTGGCCGAGCAGTCCGATTACCTCGAGACCTGCTACCTGTTGCTCAACGGCGAGCTGCCAACCGCCGAACAGAAAGCCCAGTTCGTGGCCGTGGTCAAGAACCACACGATGGTTCACGAACAACTCAAGACCTTCTTCAACGGCTTTCGCCGTGACGCCCACCCGATGGCCGTCATGTGCGGTGTAGTCGGCGCCC
	29	forest	moss	Rhytidiadelphus squarrosus	2020	EG2016_06	CAATACTGACCGGTACAGTGGGTCCGGACGTGATCGACGTACGCGGTCTGACCGCCACCGGCCGCTTCACATTTGACCCTGGCTTCATGTCCACGGCCTCTTGCGAGTCGAAGATCACCTACATTGATGGTGACAACGGAATTCTGCTGCACCGCGGCTACCCGATCGAACAACTGGCCGAGCAGTCCGATTACCTCGAGACCTGCTACCTGTTGCTCAACGGCGAGCTGCCAACCGCCGAACAGAAAGCCCAGTTCGTGGCCGTGGTCAAGAACCACACGATGGTTCACGAACAACTCAAGACCTTCTTCAACGGCTTTCGCCGTGACGCCCACCCGATGGCCGTCATGTGCGGTGTAGTCGGCGCCC
	29	forest	moss	Rhytidiadelphus squarrosus	2020	EG2016_07	CAATACTGACCGGTACAGTGGGTCCGGACGTGATCGACGTACGCGGTCTGACCGCCACCGGCCGCTTCACATTTGACCCTGGCTTCATGTCCACGGCCTCTTGCGAGTCGAAGATCACCTACATTGATGGTGACAACGGAATTCTGCTGCACCGCGGCTACCCGATCGAACAACTGGCCGAGCAGTCCGATTACCTCGAGACCTGCTACCTGTTGCTCAACGGCGAGCTGCCAACCGCCGAACAGAAAGCCCAGTTCGTGGCCGTGGTCAAGAACCACACGATGGTTCACGAACAACTCAAGACCTTCTTCAACGGCTTTCGCCGTGACGCCCACCCGATGGCCGTCATGTGCGGTGTAGTCGGCGCCC
	29	forest	moss	Rhytidiadelphus squarrosus	2020	EG2016_08	CAATACTGACCGGTACAGTGGGTCCGGACGTGATCGACGTACGCGGTCTGACCGCCACCGGCCGCTTCACATTTGACCCTGGCTTCATGTCCACGGCCTCTTGCGAGTCGAAGATCACCTACATTGATGGTGACAACGGAATTCTGCTGCACCGCGGCTACCCGATCGAACAACTGGCCGAGCAGTCCGATTACCTCGAGACCTGCTACCTGTTGCTCAACGGCGAGCTGCCAACCGCCGAACAGAAAGCCCAGTTCGTGGCCGTGGTCAAGAACCACACGATGGTTCACGAACAACTCAAGACCTTCTTCAACGGCTTTCGCCGTGACGCCCACCCGATGGCCGTCATGTGCGGTGTAGTCGGCGCCC
	29	forest	moss	Rhytidiadelphus squarrosus	2020	EG2016_09	CAATACTGACCGGTACAGTGGGTCCGGACGTGATCGACGTACGCGGTCTGACCGCCACCGGCCGCTTCACATTTGACCCTGGCTTCATGTCCACGGCCTCTTGCGAGTCGAAGATCACCTACATTGATGGTGACAACGGAATTCTGCTGCACCGCGGCTACCCGATCGAACAACTGGCCGAGCAGTCCGATTACCTCGAGACCTGCTACCTGTTGCTCAACGGCGAGCTGCCAACCGCCGAACAGAAAGCCCAGTTCGTGGCCGTGGTCAAGAACCACACGATGGTTCACGAACAACTCAAGACCTTCTTCAACGGCTTTCGCCGTGACGCCCACCCGATGGCCGTCATGTGCGGTGTAGTCGGCGCCC
	29	forest	moss	Rhytidiadelphus squarrosus	2020	EG2016_10	CAATACTGACCGGTACAGTGGGTCCGGACGTGATCGACGTACGCGGTCTGACCGCCACCGGCCGCTTCACATTTGACCCTGGCTTCATGTCCACGGCCTCTTGCGAGTCGAAGATCACCTACATTGATGGTGACAACGGAATTCTGCTGCACCGCGGCTACCCGATCGAACAACTGGCCGAGCAGTCCGATTACCTCGAGACCTGCTACCTGTTGCTCAACGGCGAGCTGCCAACCGCCGAACAGAAAGCCCAGTTCGTGGCCGTGGTCAAGAACCACACGATGGTTCACGAACAACTCAAGACCTTCTTCAACGGCTTTCGCCGTGACGCCCACCCGATGGCCGTCATGTGCGGTGTAGTCGGCGCCC
	29	forest	moss	Rhytidiadelphus squarrosus	2020	EG2016_12	CAATACTGACCGGTACAGTGGGTCCGGACGTGATCGACGTACGCGGTCTGACCGCCACCGGCCGCTTCACATTTGACCCTGGCTTCATGTCCACGGCCTCTTGCGAGTCGAAGATCACCTACATTGATGGTGACAACGGAATTCTGCTGCACCGCGGCTACCCGATCGAACAACTGGCCGAGCAGTCCGATTACCTCGAGACCTGCTACCTGTTGCTCAACGGCGAGCTGCCAACCGCCGAACAGAAAGCCCAGTTCGTGGCCGTGGTCAAGAACCACACGATGGTTCACGAACAACTCAAGACCTTCTTCAACGGCTTTCGCCGTGACGCCCACCCGATGGCCGTCATGTGCGGTGTAGTCGGCGCCC
	29	forest	moss	Rhytidiadelphus squarrosus	2020	EG2016_13	CAATACTGACCGGTACAGTGGGTCCGGACGTGATCGACGTACGCGGTCTGACCGCCACCGGCCGCTTCACATTTGACCCTGGCTTCATGTCCACGGCCTCTTGCGAGTCGAAGATCACCTACATTGATGGTGACAACGGAATTCTGCTGCACCGCGGCTACCCGATCGAACAACTGGCCGAGCAGTCCGATTACCTCGAGACCTGCTACCTGTTGCTCAACGGCGAGCTGCCAACCGCCGAACAGAAAGCCCAGTTCGTGGCCGTGGTCAAGAACCACACGATGGTTCACGAACAACTCAAGACCTTCTTCAACGGCTTTCGCCGTGACGCCCACCCGATGGCCGTCATGTGCGGTGTAGTCGGCGCCC
	29	forest	moss	Rhytidiadelphus squarrosus	2020	EG2016_15	CAATACTGACCGGTACAGTGGGTCCGGACGTGATCGACGTACGCGGTCTGACCGCCACCGGCCGCTTCACATTTGACCCTGGCTTCATGTCCACGGCCTCTTGCGAGTCGAAGATCACCTACATTGATGGTGACAACGGAATTCTGCTGCACCGCGGCTACCCGATCGAACAACTGGCCGAGCAGTCCGATTACCTCGAGACCTGCTACCTGTTGCTCAACGGCGAGCTGCCAACCGCCGAACAGAAAGCCCAGTTCGTGGCCGTGGTCAAGAACCACACGATGGTTCACGAACAACTCAAGACCTTCTTCAACGGCTTTCGCCGTGACGCCCACCCGATGGCCGTCATGTGCGGTGTAGTCGGCGCCC
	29	forest	moss	Rhytidiadelphus squarrosus	2020	EG2016_16	CAATACTGACCGGTACAGTGGGTCCGGACGTGATCGACGTACGCGGTCTGACCGCCACCGGCCGCTTCACATTTGACCCTGGCTTCATGTCCACGGCCTCTTGCGAGTCGAAGATCACCTACATTGATGGTGACAACGGAATTCTGCTGCACCGCGGCTACCCGATCGAACAACTGGCCGAGCAGTCCGATTACCTCGAGACCTGCTACCTGTTGCTCAACGGCGAGCTGCCAACCGCCGAACAGAAAGCCCAGTTCGTGGCCGTGGTCAAGAACCACACGATGGTTCACGAACAACTCAAGACCTTCTTCAACGGCTTTCGCCGTGACGCCCACCCGATGGCCGTCATGTGCGGTGTAGTCGGCGCCC
	29	forest	moss	Rhytidiadelphus squarrosus	2020	EG2016_17	CAATACTGACCGGTACAGTGGGTCCGGACGTGATCGACGTACGCGGTCTGACCGCCACCGGCCGCTTCACATTTGACCCTGGCTTCATGTCCACGGCCTCTTGCGAGTCGAAGATCACCTACATTGATGGTGACAACGGAATTCTGCTGCACCGCGGCTACCCGATCGAACAACTGGCCGAGCAGTCCGATTACCTCGAGACCTGCTACCTGTTGCTCAACGGCGAGCTGCCAACCGCCGAACAGAAAGCCCAGTTCGTGGCCGTGGTCAAGAACCACACGATGGTTCACGAACAACTCAAGACCTTCTTCAACGGCTTTCGCCGTGACGCCCACCCGATGGCCGTCATGTGCGGTGTAGTCGGCGCCC
	29	forest	moss	Rhytidiadelphus squarrosus	2020	EG2016_18	CAATACTGACCGGTACAGTGGGTCCGGACGTGATCGACGTACGCGGTCTGACCGCCACCGGCCGCTTCACATTTGACCCTGGCTTCATGTCCACGGCCTCTTGCGAGTCGAAGATCACCTACATTGATGGTGACAACGGAATTCTGCTGCACCGCGGCTACCCGATCGAACAACTGGCCGAGCAGTCCGATTACCTCGAGACCTGCTACCTGTTGCTCAACGGCGAGCTGCCAACCGCCGAACAGAAAGCCCAGTTCGTGGCCGTGGTCAAGAACCACACGATGGTTCACGAACAACTCAAGACCTTCTTCAACGGCTTTCGCCGTGACGCCCACCCGATGGCCGTCATGTGCGGTGTAGTCGGCGCCC
	29	forest	moss	Rhytidiadelphus squarrosus	2020	EG2016_20	CAATACTGACCGGTACAGTGGGTCCGGACGTGATCGACGTACGCGGTCTGACCGCCACCGGCCGCTTCACATTTGACCCTGGCTTCATGTCCACGGCCTCTTGCGAGTCGAAGATCACCTACATTGATGGTGACAACGGAATTCTGCTGCACCGCGGCTACCCGATCGAACAACTGGCCGAGCAGTCCGATTACCTCGAGACCTGCTACCTGTTGCTCAACGGCGAGCTGCCAACCGCCGAACAGAAAGCCCAGTTCGTGGCCGTGGTCAAGAACCACACGATGGTTCACGAACAACTCAAGACCTTCTTCAACGGCTTTCGCCGTGACGCCCACCCGATGGCCGTCATGTGCGGTGTAGTCGGCGCCC
	29	forest	moss	Rhytidiadelphus squarrosus	2020	EG2016_21	CAATACTGACCGGTACAGTGGGTCCGGACGTGATCGACGTACGCGGTCTGACCGCCACCGGCCGCTTCACATTTGACCCTGGCTTCATGTCCACGGCCTCTTGCGAGTCGAAGATCACCTACATTGATGGTGACAACGGAATTCTGCTGCACCGCGGCTACCCGATCGAACAACTGGCCGAGCAGTCCGATTACCTCGAGACCTGCTACCTGTTGCTCAACGGCGAGCTGCCAACCGCCGAACAGAAAGCCCAGTTCGTGGCCGTGGTCAAGAACCACACGATGGTTCACGAACAACTCAAGACCTTCTTCAACGGCTTTCGCCGTGACGCCCACCCGATGGCCGTCATGTGCGGTGTAGTCGGCGCCC
	29	forest	moss	Rhytidiadelphus squarrosus	2020	EG2016_22	CAATACTGACCGGTACAGTGGGTCCGGACGTGATCGACGTACGCGGTCTGACCGCCACCGGCCGCTTCACATTTGACCCTGGCTTCATGTCCACGGCCTCTTGCGAGTCGAAGATCACCTACATTGATGGTGACAACGGAATTCTGCTGCACCGCGGCTACCCGATCGAACAACTGGCCGAGCAGTCCGATTACCTCGAGACCTGCTACCTGTTGCTCAACGGCGAGCTGCCAACCGCCGAACAGAAAGCCCAGTTCGTGGCCGTGGTCAAGAACCACACGATGGTTCACGAACAACTCAAGACCTTCTTCAACGGCTTTCGCCGTGACGCCCACCCGATGGCCGTCATGTGCGGTGTAGTCGGCGCCC
	29	forest	moss	Rhytidiadelphus squarrosus	2020	EG2016_23	CAATACTGACCGGTACAGTGGGTCCGGACGTGATCGACGTACGCGGTCTGACCGCCACCGGCCGCTTCACATTTGACCCTGGCTTCATGTCCACGGCCTCTTGCGAGTCGAAGATCACCTACATTGATGGTGACAACGGAATTCTGCTGCACCGCGGCTACCCGATCGAACAACTGGCCGAGCAGTCCGATTACCTCGAGACCTGCTACCTGTTGCTCAACGGCGAGCTGCCAACCGCCGAACAGAAAGCCCAGTTCGTGGCCGTGGTCAAGAACCACACGATGGTTCACGAACAACTCAAGACCTTCTTCAACGGCTTTCGCCGTGACGCCCACCCGATGGCCGTCATGTGCGGTGTAGTCGGCGCCC
	29	forest	moss	Rhytidiadelphus squarrosus	2020	EG2016_24	CAATACTGACCGGTACAGTGGGTCCGGACGTGATCGACGTACGCGGTCTGACCGCCACCGGCCGCTTCACATTTGACCCTGGCTTCATGTCCACGGCCTCTTGCGAGTCGAAGATCACCTACATTGATGGTGACAACGGAATTCTGCTGCACCGCGGCTACCCGATCGAACAACTGGCCGAGCAGTCCGATTACCTCGAGACCTGCTACCTGTTGCTCAACGGCGAGCTGCCAACCGCCGAACAGAAAGCCCAGTTCGTGGCCGTGGTCAAGAACCACACGATGGTTCACGAACAACTCAAGACCTTCTTCAACGGCTTTCGCCGTGACGCCCACCCGATGGCCGTCATGTGCGGTGTAGTCGGCGCCC
	29	forest	moss	Rhytidiadelphus squarrosus	2020	EG2016_25	CAATACTGACCGGTACAGTGGGTCCGGACGTGATCGACGTACGCGGTCTGACCGCCACCGGCCGCTTCACATTTGACCCTGGCTTCATGTCCACGGCCTCTTGCGAGTCGAAGATCACCTACATTGATGGTGACAACGGAATTCTGCTGCACCGCGGCTACCCGATCGAACAACTGGCCGAGCAGTCCGATTACCTCGAGACCTGCTACCTGTTGCTCAACGGCGAGCTGCCAACCGCCGAACAGAAAGCCCAGTTCGTGGCCGTGGTCAAGAACCACACGATGGTTCACGAACAACTCAAGACCTTCTTCAACGGCTTTCGCCGTGACGCCCACCCGATGGCCGTCATGTGCGGTGTAGTCGGCGCCC
	29	forest	moss	Rhytidiadelphus squarrosus	2020	EG2016_26	CAATACTGACCGGTACAGTGGGTCCGGACGTGATCGACGTACGCGGTCTGACCGCCACCGGCCGCTTCACATTTGACCCTGGCTTCATGTCCACGGCCTCTTGCGAGTCGAAGATCACCTACATTGATGGTGACAACGGAATTCTGCTGCACCGCGGCTACCCGATCGAACAACTGGCCGAGCAGTCCGATTACCTCGAGACCTGCTACCTGTTGCTCAACGGCGAGCTGCCAACCGCCGAACAGAAAGCCCAGTTCGTGGCCGTGGTCAAGAACCACACGATGGTTCACGAACAACTCAAGACCTTCTTCAACGGCTTTCGCCGTGACGCCCACCCGATGGCCGTCATGTGCGGTGTAGTCGGCGCCC
	29	forest	moss	Rhytidiadelphus squarrosus	2020	EG2016_27	CAATACTGACCGGTACAGTGGGTCCGGACGTGATCGACGTACGCGGTCTGACCGCCACCGGCCGCTTCACATTTGACCCTGGCTTCATGTCCACGGCCTCTTGCGAGTCGAAGATCACCTACATTGATGGTGACAACGGAATTCTGCTGCACCGCGGCTACCCGATCGAACAACTGGCCGAGCAGTCCGATTACCTCGAGACCTGCTACCTGTTGCTCAACGGCGAGCTGCCAACCGCCGAACAGAAAGCCCAGTTCGTGGCCGTGGTCAAGAACCACACGATGGTTCACGAACAACTCAAGACCTTCTTCAACGGCTTTCGCCGTGACGCCCACCCGATGGCCGTCATGTGCGGTGTAGTCGGCGCCC
	29	forest	moss	Rhytidiadelphus squarrosus	2020	EG2016_28	CAATACTGACCGGTACAGTGGGTCCGGACGTGATCGACGTACGCGGTCTGACCGCCACCGGCCGCTTCACATTTGACCCTGGCTTCATGTCCACGGCCTCTTGCGAGTCGAAGATCACCTACATTGATGGTGACAACGGAATTCTGCTGCACCGCGGCTACCCGATCGAACAACTGGCCGAGCAGTCCGATTACCTCGAGACCTGCTACCTGTTGCTCAACGGCGAGCTGCCAACCGCCGAACAGAAAGCCCAGTTCGTGGCCGTGGTCAAGAACCACACGATGGTTCACGAACAACTCAAGACCTTCTTCAACGGCTTTCGCCGTGACGCCCACCCGATGGCCGTCATGTGCGGTGTAGTCGGCGCCC
	29	forest	moss	Rhytidiadelphus squarrosus	2020	EG2016_29	CAATACTGACCGGTACAGTGGGTCCGGACGTGATCGACGTACGCGGTCTGACCGCCACCGGCCGCTTCACATTTGACCCTGGCTTCATGTCCACGGCCTCTTGCGAGTCGAAGATCACCTACATTGATGGTGACAACGGAATTCTGCTGCACCGCGGCTACCCGATCGAACAACTGGCCGAGCAGTCCGATTACCTCGAGACCTGCTACCTGTTGCTCAACGGCGAGCTGCCAACCGCCGAACAGAAAGCCCAGTTCGTGGCCGTGGTCAAGAACCACACGATGGTTCACGAACAACTCAAGACCTTCTTCAACGGCTTTCGCCGTGACGCCCACCCGATGGCCGTCATGTGCGGTGTAGTCGGCGCCC
	30	forest	plant	mixed grasses	2020	BR2003_09	CATTCTCACCGGCACCGTAGGCCCAGACGTGATCGACGTACGCGGTCTTACCGCCACCGGCCGCTTCACATTCGACCCAGGCTTCATGTCGACCGCCTCTTGCGAGTCGAAGATCACCTACATTGATGGTGACAACGGGATCCTGCTGCACCGCGGCTATCCGATCGAACAACTGGCCGAGCAATCGGACTATCTGGAAACCTGCTATCTGCTGCTGAACGGCGAACTGCCAACCGCCGAGCAGAAAGCCCAGTTCGTTGTTGTCGTGAAAAACCACACCATGGTTCACGAACAGCTCAAGACCTTCTTCAACGGCTTCCGCCGCGACGCTCATCCGATGGCGGTGATGTGTGGCGTGGTGGGTGCCC
	30	BoreoHeathMossGrass	plant	wild grasses from mixed stand -location_3	2018	ISL0236	CATTCTCACCGGCACCGTAGGCCCAGACGTGATCGACGTACGCGGTCTTACCGCCACCGGCCGCTTCACATTCGACCCAGGCTTCATGTCGACCGCCTCTTGCGAGTCGAAGATCACCTACATTGATGGTGACAACGGGATCCTGCTGCACCGCGGCTATCCGATCGAACAACTGGCCGAGCAATCGGACTATCTGGAAACCTGCTATCTGCTGCTGAACGGCGAACTGCCAACCGCCGAGCAGAAAGCCCAGTTCGTTGTTGTCGTGAAAAACCACACCATGGTTCACGAACAGCTCAAGACCTTCTTCAACGGCTTCCGCCGCGACGCTCATCCGATGGCGGTGATGTGTGGCGTGGTGGGTGCCC
	30	BoreoHeathMossGrass	plant	wild grasses from mixed stand -location_3	2018	ISL0244	CATTCTCACCGGCACCGTAGGCCCAGACGTGATCGACGTACGCGGTCTTACCGCCACCGGCCGCTTCACATTCGACCCAGGCTTCATGTCGACCGCCTCTTGCGAGTCGAAGATCACCTACATTGATGGTGACAACGGGATCCTGCTGCACCGCGGCTATCCGATCGAACAACTGGCCGAGCAATCGGACTATCTGGAAACCTGCTATCTGCTGCTGAACGGCGAACTGCCAACCGCCGAGCAGAAAGCCCAGTTCGTTGTTGTCGTGAAAAACCACACCATGGTTCACGAACAGCTCAAGACCTTCTTCAACGGCTTCCGCCGCGACGCTCATCCGATGGCGGTGATGTGTGGCGTGGTGGGTGCCC
	30	BoreoHeathMossGrass	plant	wild grasses from mixed stand -location_3	2018	ISL0246	CATTCTCACCGGCACCGTAGGCCCAGACGTGATCGACGTACGCGGTCTTACCGCCACCGGCCGCTTCACATTCGACCCAGGCTTCATGTCGACCGCCTCTTGCGAGTCGAAGATCACCTACATTGATGGTGACAACGGGATCCTGCTGCACCGCGGCTATCCGATCGAACAACTGGCCGAGCAATCGGACTATCTGGAAACCTGCTATCTGCTGCTGAACGGCGAACTGCCAACCGCCGAGCAGAAAGCCCAGTTCGTTGTTGTCGTGAAAAACCACACCATGGTTCACGAACAGCTCAAGACCTTCTTCAACGGCTTCCGCCGCGACGCTCATCCGATGGCGGTGATGTGTGGCGTGGTGGGTGCCC
	30	BoreoHeathMossGrass	moss	moss from mixed stand - location_3	2018	ISL0272	CATTCTCACCGGCACCGTAGGCCCAGACGTGATCGACGTACGCGGTCTTACCGCCACCGGCCGCTTCACATTCGACCCAGGCTTCATGTCGACCGCCTCTTGCGAGTCGAAGATCACCTACATTGATGGTGACAACGGGATCCTGCTGCACCGCGGCTATCCGATCGAACAACTGGCCGAGCAATCGGACTATCTGGAAACCTGCTATCTGCTGCTGAACGGCGAACTGCCAACCGCCGAGCAGAAAGCCCAGTTCGTTGTTGTCGTGAAAAACCACACCATGGTTCACGAACAGCTCAAGACCTTCTTCAACGGCTTCCGCCGCGACGCTCATCCGATGGCGGTGATGTGTGGCGTGGTGGGTGCCC
	30	BoreoHeathMossGrass	moss	moss from mixed stand - location_3	2018	ISL0273	CATTCTCACCGGCACCGTAGGCCCAGACGTGATCGACGTACGCGGTCTTACCGCCACCGGCCGCTTCACATTCGACCCAGGCTTCATGTCGACCGCCTCTTGCGAGTCGAAGATCACCTACATTGATGGTGACAACGGGATCCTGCTGCACCGCGGCTATCCGATCGAACAACTGGCCGAGCAATCGGACTATCTGGAAACCTGCTATCTGCTGCTGAACGGCGAACTGCCAACCGCCGAGCAGAAAGCCCAGTTCGTTGTTGTCGTGAAAAACCACACCATGGTTCACGAACAGCTCAAGACCTTCTTCAACGGCTTCCGCCGCGACGCTCATCCGATGGCGGTGATGTGTGGCGTGGTGGGTGCCC
	30	BoreoHeathMossGrass	moss	moss from mixed stand - location_3	2018	ISL0275	CATTCTCACCGGCACCGTAGGCCCAGACGTGATCGACGTACGCGGTCTTACCGCCACCGGCCGCTTCACATTCGACCCAGGCTTCATGTCGACCGCCTCTTGCGAGTCGAAGATCACCTACATTGATGGTGACAACGGGATCCTGCTGCACCGCGGCTATCCGATCGAACAACTGGCCGAGCAATCGGACTATCTGGAAACCTGCTATCTGCTGCTGAACGGCGAACTGCCAACCGCCGAGCAGAAAGCCCAGTTCGTTGTTGTCGTGAAAAACCACACCATGGTTCACGAACAGCTCAAGACCTTCTTCAACGGCTTCCGCCGCGACGCTCATCCGATGGCGGTGATGTGTGGCGTGGTGGGTGCCC
	30	BoreoHeathMossGrass	moss	moss from mixed stand - location_3	2018	ISL0283	CATTCTCACCGGCACCGTAGGCCCAGACGTGATCGACGTACGCGGTCTTACCGCCACCGGCCGCTTCACATTCGACCCAGGCTTCATGTCGACCGCCTCTTGCGAGTCGAAGATCACCTACATTGATGGTGACAACGGGATCCTGCTGCACCGCGGCTATCCGATCGAACAACTGGCCGAGCAATCGGACTATCTGGAAACCTGCTATCTGCTGCTGAACGGCGAACTGCCAACCGCCGAGCAGAAAGCCCAGTTCGTTGTTGTCGTGAAAAACCACACCATGGTTCACGAACAGCTCAAGACCTTCTTCAACGGCTTCCGCCGCGACGCTCATCCGATGGCGGTGATGTGTGGCGTGGTGGGTGCCC
	30	BoreoHeathMossGrass	moss	moss from mixed stand - location_3	2018	ISL0289	CATTCTCACCGGCACCGTAGGCCCAGACGTGATCGACGTACGCGGTCTTACCGCCACCGGCCGCTTCACATTCGACCCAGGCTTCATGTCGACCGCCTCTTGCGAGTCGAAGATCACCTACATTGATGGTGACAACGGGATCCTGCTGCACCGCGGCTATCCGATCGAACAACTGGCCGAGCAATCGGACTATCTGGAAACCTGCTATCTGCTGCTGAACGGCGAACTGCCAACCGCCGAGCAGAAAGCCCAGTTCGTTGTTGTCGTGAAAAACCACACCATGGTTCACGAACAGCTCAAGACCTTCTTCAACGGCTTCCGCCGCGACGCTCATCCGATGGCGGTGATGTGTGGCGTGGTGGGTGCCC
	30	BoreoHeathMossGrass	moss	moss from mixed stand - location_3	2018	ISL0290	CATTCTCACCGGCACCGTAGGCCCAGACGTGATCGACGTACGCGGTCTTACCGCCACCGGCCGCTTCACATTCGACCCAGGCTTCATGTCGACCGCCTCTTGCGAGTCGAAGATCACCTACATTGATGGTGACAACGGGATCCTGCTGCACCGCGGCTATCCGATCGAACAACTGGCCGAGCAATCGGACTATCTGGAAACCTGCTATCTGCTGCTGAACGGCGAACTGCCAACCGCCGAGCAGAAAGCCCAGTTCGTTGTTGTCGTGAAAAACCACACCATGGTTCACGAACAGCTCAAGACCTTCTTCAACGGCTTCCGCCGCGACGCTCATCCGATGGCGGTGATGTGTGGCGTGGTGGGTGCCC
	30	BoreoHeathMossGrass	moss	moss from mixed stand - location_4	2018	ISL0358	CATTCTCACCGGCACCGTAGGCCCAGACGTGATCGACGTACGCGGTCTTACCGCCACCGGCCGCTTCACATTCGACCCAGGCTTCATGTCGACCGCCTCTTGCGAGTCGAAGATCACCTACATTGATGGTGACAACGGGATCCTGCTGCACCGCGGCTATCCGATCGAACAACTGGCCGAGCAATCGGACTATCTGGAAACCTGCTATCTGCTGCTGAACGGCGAACTGCCAACCGCCGAGCAGAAAGCCCAGTTCGTTGTTGTCGTGAAAAACCACACCATGGTTCACGAACAGCTCAAGACCTTCTTCAACGGCTTCCGCCGCGACGCTCATCCGATGGCGGTGATGTGTGGCGTGGTGGGTGCCC
	30	BoreoHeathMossGrass	moss	moss from mixed stand - location_4	2018	ISL0360	CATTCTCACCGGCACCGTAGGCCCAGACGTGATCGACGTACGCGGTCTTACCGCCACCGGCCGCTTCACATTCGACCCAGGCTTCATGTCGACCGCCTCTTGCGAGTCGAAGATCACCTACATTGATGGTGACAACGGGATCCTGCTGCACCGCGGCTATCCGATCGAACAACTGGCCGAGCAATCGGACTATCTGGAAACCTGCTATCTGCTGCTGAACGGCGAACTGCCAACCGCCGAGCAGAAAGCCCAGTTCGTTGTTGTCGTGAAAAACCACACCATGGTTCACGAACAGCTCAAGACCTTCTTCAACGGCTTCCGCCGCGACGCTCATCCGATGGCGGTGATGTGTGGCGTGGTGGGTGCCC
	30	BoreoHeathMossGrass	moss	moss from mixed stand - location_4	2018	ISL0362	CATTCTCACCGGCACCGTAGGCCCAGACGTGATCGACGTACGCGGTCTTACCGCCACCGGCCGCTTCACATTCGACCCAGGCTTCATGTCGACCGCCTCTTGCGAGTCGAAGATCACCTACATTGATGGTGACAACGGGATCCTGCTGCACCGCGGCTATCCGATCGAACAACTGGCCGAGCAATCGGACTATCTGGAAACCTGCTATCTGCTGCTGAACGGCGAACTGCCAACCGCCGAGCAGAAAGCCCAGTTCGTTGTTGTCGTGAAAAACCACACCATGGTTCACGAACAGCTCAAGACCTTCTTCAACGGCTTCCGCCGCGACGCTCATCCGATGGCGGTGATGTGTGGCGTGGTGGGTGCCC
	30	BoreoHeathMossGrass	moss	moss from mixed stand - location_4	2018	ISL0363	CATTCTCACCGGCACCGTAGGCCCAGACGTGATCGACGTACGCGGTCTTACCGCCACCGGCCGCTTCACATTCGACCCAGGCTTCATGTCGACCGCCTCTTGCGAGTCGAAGATCACCTACATTGATGGTGACAACGGGATCCTGCTGCACCGCGGCTATCCGATCGAACAACTGGCCGAGCAATCGGACTATCTGGAAACCTGCTATCTGCTGCTGAACGGCGAACTGCCAACCGCCGAGCAGAAAGCCCAGTTCGTTGTTGTCGTGAAAAACCACACCATGGTTCACGAACAGCTCAAGACCTTCTTCAACGGCTTCCGCCGCGACGCTCATCCGATGGCGGTGATGTGTGGCGTGGTGGGTGCCC
	30	BoreoHeathMossGrass	moss	moss from mixed stand - location_4	2018	ISL0364	CATTCTCACCGGCACCGTAGGCCCAGACGTGATCGACGTACGCGGTCTTACCGCCACCGGCCGCTTCACATTCGACCCAGGCTTCATGTCGACCGCCTCTTGCGAGTCGAAGATCACCTACATTGATGGTGACAACGGGATCCTGCTGCACCGCGGCTATCCGATCGAACAACTGGCCGAGCAATCGGACTATCTGGAAACCTGCTATCTGCTGCTGAACGGCGAACTGCCAACCGCCGAGCAGAAAGCCCAGTTCGTTGTTGTCGTGAAAAACCACACCATGGTTCACGAACAGCTCAAGACCTTCTTCAACGGCTTCCGCCGCGACGCTCATCCGATGGCGGTGATGTGTGGCGTGGTGGGTGCCC
	30	BoreoHeathMossGrass	moss	moss from mixed stand - location_4	2018	ISL0367	CATTCTCACCGGCACCGTAGGCCCAGACGTGATCGACGTACGCGGTCTTACCGCCACCGGCCGCTTCACATTCGACCCAGGCTTCATGTCGACCGCCTCTTGCGAGTCGAAGATCACCTACATTGATGGTGACAACGGGATCCTGCTGCACCGCGGCTATCCGATCGAACAACTGGCCGAGCAATCGGACTATCTGGAAACCTGCTATCTGCTGCTGAACGGCGAACTGCCAACCGCCGAGCAGAAAGCCCAGTTCGTTGTTGTCGTGAAAAACCACACCATGGTTCACGAACAGCTCAAGACCTTCTTCAACGGCTTCCGCCGCGACGCTCATCCGATGGCGGTGATGTGTGGCGTGGTGGGTGCCC
	30	BoreoHeathMossGrass	moss	moss from mixed stand - location_4	2018	ISL0371	CATTCTCACCGGCACCGTAGGCCCAGACGTGATCGACGTACGCGGTCTTACCGCCACCGGCCGCTTCACATTCGACCCAGGCTTCATGTCGACCGCCTCTTGCGAGTCGAAGATCACCTACATTGATGGTGACAACGGGATCCTGCTGCACCGCGGCTATCCGATCGAACAACTGGCCGAGCAATCGGACTATCTGGAAACCTGCTATCTGCTGCTGAACGGCGAACTGCCAACCGCCGAGCAGAAAGCCCAGTTCGTTGTTGTCGTGAAAAACCACACCATGGTTCACGAACAGCTCAAGACCTTCTTCAACGGCTTCCGCCGCGACGCTCATCCGATGGCGGTGATGTGTGGCGTGGTGGGTGCCC
	30	BoreoHeathMossGrass	moss	moss from mixed stand - location_4	2018	ISL0372	CATTCTCACCGGCACCGTAGGCCCAGACGTGATCGACGTACGCGGTCTTACCGCCACCGGCCGCTTCACATTCGACCCAGGCTTCATGTCGACCGCCTCTTGCGAGTCGAAGATCACCTACATTGATGGTGACAACGGGATCCTGCTGCACCGCGGCTATCCGATCGAACAACTGGCCGAGCAATCGGACTATCTGGAAACCTGCTATCTGCTGCTGAACGGCGAACTGCCAACCGCCGAGCAGAAAGCCCAGTTCGTTGTTGTCGTGAAAAACCACACCATGGTTCACGAACAGCTCAAGACCTTCTTCAACGGCTTCCGCCGCGACGCTCATCCGATGGCGGTGATGTGTGGCGTGGTGGGTGCCC
	30	BoreoHeathMossGrass	moss	moss from mixed stand - location_4	2018	ISL0377	CATTCTCACCGGCACCGTAGGCCCAGACGTGATCGACGTACGCGGTCTTACCGCCACCGGCCGCTTCACATTCGACCCAGGCTTCATGTCGACCGCCTCTTGCGAGTCGAAGATCACCTACATTGATGGTGACAACGGGATCCTGCTGCACCGCGGCTATCCGATCGAACAACTGGCCGAGCAATCGGACTATCTGGAAACCTGCTATCTGCTGCTGAACGGCGAACTGCCAACCGCCGAGCAGAAAGCCCAGTTCGTTGTTGTCGTGAAAAACCACACCATGGTTCACGAACAGCTCAAGACCTTCTTCAACGGCTTCCGCCGCGACGCTCATCCGATGGCGGTGATGTGTGGCGTGGTGGGTGCCC
	30	BoreoHeathMossGrass	moss	moss from mixed stand - location_4	2018	ISL0381	CATTCTCACCGGCACCGTAGGCCCAGACGTGATCGACGTACGCGGTCTTACCGCCACCGGCCGCTTCACATTCGACCCAGGCTTCATGTCGACCGCCTCTTGCGAGTCGAAGATCACCTACATTGATGGTGACAACGGGATCCTGCTGCACCGCGGCTATCCGATCGAACAACTGGCCGAGCAATCGGACTATCTGGAAACCTGCTATCTGCTGCTGAACGGCGAACTGCCAACCGCCGAGCAGAAAGCCCAGTTCGTTGTTGTCGTGAAAAACCACACCATGGTTCACGAACAGCTCAAGACCTTCTTCAACGGCTTCCGCCGCGACGCTCATCCGATGGCGGTGATGTGTGGCGTGGTGGGTGCCC
	30	BoreoHeathMossGrass	moss	moss from mixed stand - location_4	2018	ISL0383	CATTCTCACCGGCACCGTAGGCCCAGACGTGATCGACGTACGCGGTCTTACCGCCACCGGCCGCTTCACATTCGACCCAGGCTTCATGTCGACCGCCTCTTGCGAGTCGAAGATCACCTACATTGATGGTGACAACGGGATCCTGCTGCACCGCGGCTATCCGATCGAACAACTGGCCGAGCAATCGGACTATCTGGAAACCTGCTATCTGCTGCTGAACGGCGAACTGCCAACCGCCGAGCAGAAAGCCCAGTTCGTTGTTGTCGTGAAAAACCACACCATGGTTCACGAACAGCTCAAGACCTTCTTCAACGGCTTCCGCCGCGACGCTCATCCGATGGCGGTGATGTGTGGCGTGGTGGGTGCCC
	30	BoreoHeathMossGrass	moss	moss from mixed stand - location_4	2018	ISL0384	CATTCTCACCGGCACCGTAGGCCCAGACGTGATCGACGTACGCGGTCTTACCGCCACCGGCCGCTTCACATTCGACCCAGGCTTCATGTCGACCGCCTCTTGCGAGTCGAAGATCACCTACATTGATGGTGACAACGGGATCCTGCTGCACCGCGGCTATCCGATCGAACAACTGGCCGAGCAATCGGACTATCTGGAAACCTGCTATCTGCTGCTGAACGGCGAACTGCCAACCGCCGAGCAGAAAGCCCAGTTCGTTGTTGTCGTGAAAAACCACACCATGGTTCACGAACAGCTCAAGACCTTCTTCAACGGCTTCCGCCGCGACGCTCATCCGATGGCGGTGATGTGTGGCGTGGTGGGTGCCC
	30	BoreoHeathMossGrass	moss	moss from mixed stand - location_4	2018	ISL0388	CATTCTCACCGGCACCGTAGGCCCAGACGTGATCGACGTACGCGGTCTTACCGCCACCGGCCGCTTCACATTCGACCCAGGCTTCATGTCGACCGCCTCTTGCGAGTCGAAGATCACCTACATTGATGGTGACAACGGGATCCTGCTGCACCGCGGCTATCCGATCGAACAACTGGCCGAGCAATCGGACTATCTGGAAACCTGCTATCTGCTGCTGAACGGCGAACTGCCAACCGCCGAGCAGAAAGCCCAGTTCGTTGTTGTCGTGAAAAACCACACCATGGTTCACGAACAGCTCAAGACCTTCTTCAACGGCTTCCGCCGCGACGCTCATCCGATGGCGGTGATGTGTGGCGTGGTGGGTGCCC
	30	BoreoHeathMossGrass	moss	moss from mixed stand - location_4	2018	ISL0395	CATTCTCACCGGCACCGTAGGCCCAGACGTGATCGACGTACGCGGTCTTACCGCCACCGGCCGCTTCACATTCGACCCAGGCTTCATGTCGACCGCCTCTTGCGAGTCGAAGATCACCTACATTGATGGTGACAACGGGATCCTGCTGCACCGCGGCTATCCGATCGAACAACTGGCCGAGCAATCGGACTATCTGGAAACCTGCTATCTGCTGCTGAACGGCGAACTGCCAACCGCCGAGCAGAAAGCCCAGTTCGTTGTTGTCGTGAAAAACCACACCATGGTTCACGAACAGCTCAAGACCTTCTTCAACGGCTTCCGCCGCGACGCTCATCCGATGGCGGTGATGTGTGGCGTGGTGGGTGCCC
	31	forest	moss	Rhytidiadelphus loreus	2020	EG2019_02	CATTCTCACCGGCACCGTAGGCCCAGACGTGATCGACGTACGCGGTCTTACCGCCACCGGCCGCTTCACATTCGACCCAGGCTTCATGTCGACCGCCTCTTGCGAGTCGAAGATCACCTACATTGATGGTGACAACGGGATCCTGCTGCACCGCGGCTATCCGATCGAACAACTGGCCGAGCAATCGGACTATCTGGAAACCTGCTATCTGCTGCTGAACGGCGAACTGCCAACCGCCGAGCAGAAAGCCCAGTTCGTTGTTGTCGTGAAAAACCACACCATGGTTCACGAACAGCTCAAGACCTTCTTCAACGGCTTCCGCCGCGACGCTCACCCGATGGCGGTGATGTGTGGCGTGGTGGGTGCCC
	31	forest	moss	Rhytidiadelphus loreus	2020	EG2019_05	CATTCTCACCGGCACCGTAGGCCCAGACGTGATCGACGTACGCGGTCTTACCGCCACCGGCCGCTTCACATTCGACCCAGGCTTCATGTCGACCGCCTCTTGCGAGTCGAAGATCACCTACATTGATGGTGACAACGGGATCCTGCTGCACCGCGGCTATCCGATCGAACAACTGGCCGAGCAATCGGACTATCTGGAAACCTGCTATCTGCTGCTGAACGGCGAACTGCCAACCGCCGAGCAGAAAGCCCAGTTCGTTGTTGTCGTGAAAAACCACACCATGGTTCACGAACAGCTCAAGACCTTCTTCAACGGCTTCCGCCGCGACGCTCACCCGATGGCGGTGATGTGTGGCGTGGTGGGTGCCC
	31	forest	moss	Rhytidiadelphus loreus	2020	EG2019_08	CATTCTCACCGGCACCGTAGGCCCAGACGTGATCGACGTACGCGGTCTTACCGCCACCGGCCGCTTCACATTCGACCCAGGCTTCATGTCGACCGCCTCTTGCGAGTCGAAGATCACCTACATTGATGGTGACAACGGGATCCTGCTGCACCGCGGCTATCCGATCGAACAACTGGCCGAGCAATCGGACTATCTGGAAACCTGCTATCTGCTGCTGAACGGCGAACTGCCAACCGCCGAGCAGAAAGCCCAGTTCGTTGTTGTCGTGAAAAACCACACCATGGTTCACGAACAGCTCAAGACCTTCTTCAACGGCTTCCGCCGCGACGCTCACCCGATGGCGGTGATGTGTGGCGTGGTGGGTGCCC
	31	forest	moss	Rhytidiadelphus loreus	2020	EG2019_22	CATTCTCACCGGCACCGTAGGCCCAGACGTGATCGACGTACGCGGTCTTACCGCCACCGGCCGCTTCACATTCGACCCAGGCTTCATGTCGACCGCCTCTTGCGAGTCGAAGATCACCTACATTGATGGTGACAACGGGATCCTGCTGCACCGCGGCTATCCGATCGAACAACTGGCCGAGCAATCGGACTATCTGGAAACCTGCTATCTGCTGCTGAACGGCGAACTGCCAACCGCCGAGCAGAAAGCCCAGTTCGTTGTTGTCGTGAAAAACCACACCATGGTTCACGAACAGCTCAAGACCTTCTTCAACGGCTTCCGCCGCGACGCTCACCCGATGGCGGTGATGTGTGGCGTGGTGGGTGCCC
	31	forest	moss	Rhytidiadelphus loreus	2020	EG2019_27	CATTCTCACCGGCACCGTAGGCCCAGACGTGATCGACGTACGCGGTCTTACCGCCACCGGCCGCTTCACATTCGACCCAGGCTTCATGTCGACCGCCTCTTGCGAGTCGAAGATCACCTACATTGATGGTGACAACGGGATCCTGCTGCACCGCGGCTATCCGATCGAACAACTGGCCGAGCAATCGGACTATCTGGAAACCTGCTATCTGCTGCTGAACGGCGAACTGCCAACCGCCGAGCAGAAAGCCCAGTTCGTTGTTGTCGTGAAAAACCACACCATGGTTCACGAACAGCTCAAGACCTTCTTCAACGGCTTCCGCCGCGACGCTCACCCGATGGCGGTGATGTGTGGCGTGGTGGGTGCCC
	31	BoreoHeathMossGrass	plant	Alchemilla alpina	2020	HV2005_03	CATTCTCACCGGCACCGTAGGCCCAGACGTGATCGACGTACGCGGTCTTACCGCCACCGGCCGCTTCACATTCGACCCAGGCTTCATGTCGACCGCCTCTTGCGAGTCGAAGATCACCTACATTGATGGTGACAACGGGATCCTGCTGCACCGCGGCTATCCGATCGAACAACTGGCCGAGCAATCGGACTATCTGGAAACCTGCTATCTGCTGCTGAACGGCGAACTGCCAACCGCCGAGCAGAAAGCCCAGTTCGTTGTTGTCGTGAAAAACCACACCATGGTTCACGAACAGCTCAAGACCTTCTTCAACGGCTTCCGCCGCGACGCTCACCCGATGGCGGTGATGTGTGGCGTGGTGGGTGCCC
	31	BoreoHeathMossGrass	plant	Alchemilla alpina	2020	HV2005_05	CATTCTCACCGGCACCGTAGGCCCAGACGTGATCGACGTACGCGGTCTTACCGCCACCGGCCGCTTCACATTCGACCCAGGCTTCATGTCGACCGCCTCTTGCGAGTCGAAGATCACCTACATTGATGGTGACAACGGGATCCTGCTGCACCGCGGCTATCCGATCGAACAACTGGCCGAGCAATCGGACTATCTGGAAACCTGCTATCTGCTGCTGAACGGCGAACTGCCAACCGCCGAGCAGAAAGCCCAGTTCGTTGTTGTCGTGAAAAACCACACCATGGTTCACGAACAGCTCAAGACCTTCTTCAACGGCTTCCGCCGCGACGCTCACCCGATGGCGGTGATGTGTGGCGTGGTGGGTGCCC
	31	BoreoHeathMossGrass	plant	Alchemilla alpina	2020	HV2005_09	CATTCTCACCGGCACCGTAGGCCCAGACGTGATCGACGTACGCGGTCTTACCGCCACCGGCCGCTTCACATTCGACCCAGGCTTCATGTCGACCGCCTCTTGCGAGTCGAAGATCACCTACATTGATGGTGACAACGGGATCCTGCTGCACCGCGGCTATCCGATCGAACAACTGGCCGAGCAATCGGACTATCTGGAAACCTGCTATCTGCTGCTGAACGGCGAACTGCCAACCGCCGAGCAGAAAGCCCAGTTCGTTGTTGTCGTGAAAAACCACACCATGGTTCACGAACAGCTCAAGACCTTCTTCAACGGCTTCCGCCGCGACGCTCACCCGATGGCGGTGATGTGTGGCGTGGTGGGTGCCC
	31	BoreoHeathMossGrass	plant	Alchemilla alpina	2020	HV2005_15	CATTCTCACCGGCACCGTAGGCCCAGACGTGATCGACGTACGCGGTCTTACCGCCACCGGCCGCTTCACATTCGACCCAGGCTTCATGTCGACCGCCTCTTGCGAGTCGAAGATCACCTACATTGATGGTGACAACGGGATCCTGCTGCACCGCGGCTATCCGATCGAACAACTGGCCGAGCAATCGGACTATCTGGAAACCTGCTATCTGCTGCTGAACGGCGAACTGCCAACCGCCGAGCAGAAAGCCCAGTTCGTTGTTGTCGTGAAAAACCACACCATGGTTCACGAACAGCTCAAGACCTTCTTCAACGGCTTCCGCCGCGACGCTCACCCGATGGCGGTGATGTGTGGCGTGGTGGGTGCCC
	31	BoreoHeathMossGrass	plant	Alchemilla alpina	2020	HV2005_21	CATTCTCACCGGCACCGTAGGCCCAGACGTGATCGACGTACGCGGTCTTACCGCCACCGGCCGCTTCACATTCGACCCAGGCTTCATGTCGACCGCCTCTTGCGAGTCGAAGATCACCTACATTGATGGTGACAACGGGATCCTGCTGCACCGCGGCTATCCGATCGAACAACTGGCCGAGCAATCGGACTATCTGGAAACCTGCTATCTGCTGCTGAACGGCGAACTGCCAACCGCCGAGCAGAAAGCCCAGTTCGTTGTTGTCGTGAAAAACCACACCATGGTTCACGAACAGCTCAAGACCTTCTTCAACGGCTTCCGCCGCGACGCTCACCCGATGGCGGTGATGTGTGGCGTGGTGGGTGCCC
	31	BoreoHeathMossGrass	plant	Alchemilla alpina	2020	HV2005_23	CATTCTCACCGGCACCGTAGGCCCAGACGTGATCGACGTACGCGGTCTTACCGCCACCGGCCGCTTCACATTCGACCCAGGCTTCATGTCGACCGCCTCTTGCGAGTCGAAGATCACCTACATTGATGGTGACAACGGGATCCTGCTGCACCGCGGCTATCCGATCGAACAACTGGCCGAGCAATCGGACTATCTGGAAACCTGCTATCTGCTGCTGAACGGCGAACTGCCAACCGCCGAGCAGAAAGCCCAGTTCGTTGTTGTCGTGAAAAACCACACCATGGTTCACGAACAGCTCAAGACCTTCTTCAACGGCTTCCGCCGCGACGCTCACCCGATGGCGGTGATGTGTGGCGTGGTGGGTGCCC
	31	BoreoHeathMossGrass	plant	wild grasses from mixed stand -location_2	2018	ISL0182	CATTCTCACCGGCACCGTAGGCCCAGACGTGATCGACGTACGCGGTCTTACCGCCACCGGCCGCTTCACATTCGACCCAGGCTTCATGTCGACCGCCTCTTGCGAGTCGAAGATCACCTACATTGATGGTGACAACGGGATCCTGCTGCACCGCGGCTATCCGATCGAACAACTGGCCGAGCAATCGGACTATCTGGAAACCTGCTATCTGCTGCTGAACGGCGAACTGCCAACCGCCGAGCAGAAAGCCCAGTTCGTTGTTGTCGTGAAAAACCACACCATGGTTCACGAACAGCTCAAGACCTTCTTCAACGGCTTCCGCCGCGACGCTCACCCGATGGCGGTGATGTGTGGCGTGGTGGGTGCCC
	31	BoreoHeathMossGrass	plant	wild grasses from mixed stand -location_2	2018	ISL0184	CATTCTCACCGGCACCGTAGGCCCAGACGTGATCGACGTACGCGGTCTTACCGCCACCGGCCGCTTCACATTCGACCCAGGCTTCATGTCGACCGCCTCTTGCGAGTCGAAGATCACCTACATTGATGGTGACAACGGGATCCTGCTGCACCGCGGCTATCCGATCGAACAACTGGCCGAGCAATCGGACTATCTGGAAACCTGCTATCTGCTGCTGAACGGCGAACTGCCAACCGCCGAGCAGAAAGCCCAGTTCGTTGTTGTCGTGAAAAACCACACCATGGTTCACGAACAGCTCAAGACCTTCTTCAACGGCTTCCGCCGCGACGCTCACCCGATGGCGGTGATGTGTGGCGTGGTGGGTGCCC
	31	BoreoHeathMossGrass	plant	wild grasses from mixed stand -location_2	2018	ISL0186	CATTCTCACCGGCACCGTAGGCCCAGACGTGATCGACGTACGCGGTCTTACCGCCACCGGCCGCTTCACATTCGACCCAGGCTTCATGTCGACCGCCTCTTGCGAGTCGAAGATCACCTACATTGATGGTGACAACGGGATCCTGCTGCACCGCGGCTATCCGATCGAACAACTGGCCGAGCAATCGGACTATCTGGAAACCTGCTATCTGCTGCTGAACGGCGAACTGCCAACCGCCGAGCAGAAAGCCCAGTTCGTTGTTGTCGTGAAAAACCACACCATGGTTCACGAACAGCTCAAGACCTTCTTCAACGGCTTCCGCCGCGACGCTCACCCGATGGCGGTGATGTGTGGCGTGGTGGGTGCCC
	31	BoreoHeathMossGrass	plant	wild grasses from mixed stand -location_2	2018	ISL0191	CATTCTCACCGGCACCGTAGGCCCAGACGTGATCGACGTACGCGGTCTTACCGCCACCGGCCGCTTCACATTCGACCCAGGCTTCATGTCGACCGCCTCTTGCGAGTCGAAGATCACCTACATTGATGGTGACAACGGGATCCTGCTGCACCGCGGCTATCCGATCGAACAACTGGCCGAGCAATCGGACTATCTGGAAACCTGCTATCTGCTGCTGAACGGCGAACTGCCAACCGCCGAGCAGAAAGCCCAGTTCGTTGTTGTCGTGAAAAACCACACCATGGTTCACGAACAGCTCAAGACCTTCTTCAACGGCTTCCGCCGCGACGCTCACCCGATGGCGGTGATGTGTGGCGTGGTGGGTGCCC
	31	BoreoHeathMossGrass	plant	wild grasses from mixed stand -location_2	2018	ISL0195	CATTCTCACCGGCACCGTAGGCCCAGACGTGATCGACGTACGCGGTCTTACCGCCACCGGCCGCTTCACATTCGACCCAGGCTTCATGTCGACCGCCTCTTGCGAGTCGAAGATCACCTACATTGATGGTGACAACGGGATCCTGCTGCACCGCGGCTATCCGATCGAACAACTGGCCGAGCAATCGGACTATCTGGAAACCTGCTATCTGCTGCTGAACGGCGAACTGCCAACCGCCGAGCAGAAAGCCCAGTTCGTTGTTGTCGTGAAAAACCACACCATGGTTCACGAACAGCTCAAGACCTTCTTCAACGGCTTCCGCCGCGACGCTCACCCGATGGCGGTGATGTGTGGCGTGGTGGGTGCCC
	31	BoreoHeathMossGrass	plant	wild grasses from mixed stand -location_2	2018	ISL0196	CATTCTCACCGGCACCGTAGGCCCAGACGTGATCGACGTACGCGGTCTTACCGCCACCGGCCGCTTCACATTCGACCCAGGCTTCATGTCGACCGCCTCTTGCGAGTCGAAGATCACCTACATTGATGGTGACAACGGGATCCTGCTGCACCGCGGCTATCCGATCGAACAACTGGCCGAGCAATCGGACTATCTGGAAACCTGCTATCTGCTGCTGAACGGCGAACTGCCAACCGCCGAGCAGAAAGCCCAGTTCGTTGTTGTCGTGAAAAACCACACCATGGTTCACGAACAGCTCAAGACCTTCTTCAACGGCTTCCGCCGCGACGCTCACCCGATGGCGGTGATGTGTGGCGTGGTGGGTGCCC
	31	BoreoHeathMossGrass	plant	wild grasses from mixed stand -location_3	2018	ISL0230	CATTCTCACCGGCACCGTAGGCCCAGACGTGATCGACGTACGCGGTCTTACCGCCACCGGCCGCTTCACATTCGACCCAGGCTTCATGTCGACCGCCTCTTGCGAGTCGAAGATCACCTACATTGATGGTGACAACGGGATCCTGCTGCACCGCGGCTATCCGATCGAACAACTGGCCGAGCAATCGGACTATCTGGAAACCTGCTATCTGCTGCTGAACGGCGAACTGCCAACCGCCGAGCAGAAAGCCCAGTTCGTTGTTGTCGTGAAAAACCACACCATGGTTCACGAACAGCTCAAGACCTTCTTCAACGGCTTCCGCCGCGACGCTCACCCGATGGCGGTGATGTGTGGCGTGGTGGGTGCCC
	31	BoreoHeathMossGrass	plant	wild grasses from mixed stand -location_3	2018	ISL0231	CATTCTCACCGGCACCGTAGGCCCAGACGTGATCGACGTACGCGGTCTTACCGCCACCGGCCGCTTCACATTCGACCCAGGCTTCATGTCGACCGCCTCTTGCGAGTCGAAGATCACCTACATTGATGGTGACAACGGGATCCTGCTGCACCGCGGCTATCCGATCGAACAACTGGCCGAGCAATCGGACTATCTGGAAACCTGCTATCTGCTGCTGAACGGCGAACTGCCAACCGCCGAGCAGAAAGCCCAGTTCGTTGTTGTCGTGAAAAACCACACCATGGTTCACGAACAGCTCAAGACCTTCTTCAACGGCTTCCGCCGCGACGCTCACCCGATGGCGGTGATGTGTGGCGTGGTGGGTGCCC
	31	BoreoHeathMossGrass	plant	wild grasses from mixed stand -location_3	2018	ISL0234	CATTCTCACCGGCACCGTAGGCCCAGACGTGATCGACGTACGCGGTCTTACCGCCACCGGCCGCTTCACATTCGACCCAGGCTTCATGTCGACCGCCTCTTGCGAGTCGAAGATCACCTACATTGATGGTGACAACGGGATCCTGCTGCACCGCGGCTATCCGATCGAACAACTGGCCGAGCAATCGGACTATCTGGAAACCTGCTATCTGCTGCTGAACGGCGAACTGCCAACCGCCGAGCAGAAAGCCCAGTTCGTTGTTGTCGTGAAAAACCACACCATGGTTCACGAACAGCTCAAGACCTTCTTCAACGGCTTCCGCCGCGACGCTCACCCGATGGCGGTGATGTGTGGCGTGGTGGGTGCCC
	31	BoreoHeathMossGrass	plant	wild grasses from mixed stand -location_3	2018	ISL0239	CATTCTCACCGGCACCGTAGGCCCAGACGTGATCGACGTACGCGGTCTTACCGCCACCGGCCGCTTCACATTCGACCCAGGCTTCATGTCGACCGCCTCTTGCGAGTCGAAGATCACCTACATTGATGGTGACAACGGGATCCTGCTGCACCGCGGCTATCCGATCGAACAACTGGCCGAGCAATCGGACTATCTGGAAACCTGCTATCTGCTGCTGAACGGCGAACTGCCAACCGCCGAGCAGAAAGCCCAGTTCGTTGTTGTCGTGAAAAACCACACCATGGTTCACGAACAGCTCAAGACCTTCTTCAACGGCTTCCGCCGCGACGCTCACCCGATGGCGGTGATGTGTGGCGTGGTGGGTGCCC
	31	BoreoHeathMossGrass	plant	wild grasses from mixed stand -location_3	2018	ISL0240	CATTCTCACCGGCACCGTAGGCCCAGACGTGATCGACGTACGCGGTCTTACCGCCACCGGCCGCTTCACATTCGACCCAGGCTTCATGTCGACCGCCTCTTGCGAGTCGAAGATCACCTACATTGATGGTGACAACGGGATCCTGCTGCACCGCGGCTATCCGATCGAACAACTGGCCGAGCAATCGGACTATCTGGAAACCTGCTATCTGCTGCTGAACGGCGAACTGCCAACCGCCGAGCAGAAAGCCCAGTTCGTTGTTGTCGTGAAAAACCACACCATGGTTCACGAACAGCTCAAGACCTTCTTCAACGGCTTCCGCCGCGACGCTCACCCGATGGCGGTGATGTGTGGCGTGGTGGGTGCCC
	31	BoreoHeathMossGrass	plant	wild grasses from mixed stand -location_3	2018	ISL0242	CATTCTCACCGGCACCGTAGGCCCAGACGTGATCGACGTACGCGGTCTTACCGCCACCGGCCGCTTCACATTCGACCCAGGCTTCATGTCGACCGCCTCTTGCGAGTCGAAGATCACCTACATTGATGGTGACAACGGGATCCTGCTGCACCGCGGCTATCCGATCGAACAACTGGCCGAGCAATCGGACTATCTGGAAACCTGCTATCTGCTGCTGAACGGCGAACTGCCAACCGCCGAGCAGAAAGCCCAGTTCGTTGTTGTCGTGAAAAACCACACCATGGTTCACGAACAGCTCAAGACCTTCTTCAACGGCTTCCGCCGCGACGCTCACCCGATGGCGGTGATGTGTGGCGTGGTGGGTGCCC
	31	BoreoHeathMossGrass	plant	wild grasses from mixed stand -location_3	2018	ISL0247	CATTCTCACCGGCACCGTAGGCCCAGACGTGATCGACGTACGCGGTCTTACCGCCACCGGCCGCTTCACATTCGACCCAGGCTTCATGTCGACCGCCTCTTGCGAGTCGAAGATCACCTACATTGATGGTGACAACGGGATCCTGCTGCACCGCGGCTATCCGATCGAACAACTGGCCGAGCAATCGGACTATCTGGAAACCTGCTATCTGCTGCTGAACGGCGAACTGCCAACCGCCGAGCAGAAAGCCCAGTTCGTTGTTGTCGTGAAAAACCACACCATGGTTCACGAACAGCTCAAGACCTTCTTCAACGGCTTCCGCCGCGACGCTCACCCGATGGCGGTGATGTGTGGCGTGGTGGGTGCCC
	31	BoreoHeathMossGrass	plant	wild grasses from mixed stand -location_3	2018	ISL0248	CATTCTCACCGGCACCGTAGGCCCAGACGTGATCGACGTACGCGGTCTTACCGCCACCGGCCGCTTCACATTCGACCCAGGCTTCATGTCGACCGCCTCTTGCGAGTCGAAGATCACCTACATTGATGGTGACAACGGGATCCTGCTGCACCGCGGCTATCCGATCGAACAACTGGCCGAGCAATCGGACTATCTGGAAACCTGCTATCTGCTGCTGAACGGCGAACTGCCAACCGCCGAGCAGAAAGCCCAGTTCGTTGTTGTCGTGAAAAACCACACCATGGTTCACGAACAGCTCAAGACCTTCTTCAACGGCTTCCGCCGCGACGCTCACCCGATGGCGGTGATGTGTGGCGTGGTGGGTGCCC
	31	BoreoHeathMossGrass	moss	moss from mixed stand - location_3	2018	ISL0274	CATTCTCACCGGCACCGTAGGCCCAGACGTGATCGACGTACGCGGTCTTACCGCCACCGGCCGCTTCACATTCGACCCAGGCTTCATGTCGACCGCCTCTTGCGAGTCGAAGATCACCTACATTGATGGTGACAACGGGATCCTGCTGCACCGCGGCTATCCGATCGAACAACTGGCCGAGCAATCGGACTATCTGGAAACCTGCTATCTGCTGCTGAACGGCGAACTGCCAACCGCCGAGCAGAAAGCCCAGTTCGTTGTTGTCGTGAAAAACCACACCATGGTTCACGAACAGCTCAAGACCTTCTTCAACGGCTTCCGCCGCGACGCTCACCCGATGGCGGTGATGTGTGGCGTGGTGGGTGCCC
	31	BoreoHeathMossGrass	moss	moss from mixed stand - location_3	2018	ISL0276	CATTCTCACCGGCACCGTAGGCCCAGACGTGATCGACGTACGCGGTCTTACCGCCACCGGCCGCTTCACATTCGACCCAGGCTTCATGTCGACCGCCTCTTGCGAGTCGAAGATCACCTACATTGATGGTGACAACGGGATCCTGCTGCACCGCGGCTATCCGATCGAACAACTGGCCGAGCAATCGGACTATCTGGAAACCTGCTATCTGCTGCTGAACGGCGAACTGCCAACCGCCGAGCAGAAAGCCCAGTTCGTTGTTGTCGTGAAAAACCACACCATGGTTCACGAACAGCTCAAGACCTTCTTCAACGGCTTCCGCCGCGACGCTCACCCGATGGCGGTGATGTGTGGCGTGGTGGGTGCCC
	31	BoreoHeathMossGrass	moss	moss from mixed stand - location_3	2018	ISL0277	CATTCTCACCGGCACCGTAGGCCCAGACGTGATCGACGTACGCGGTCTTACCGCCACCGGCCGCTTCACATTCGACCCAGGCTTCATGTCGACCGCCTCTTGCGAGTCGAAGATCACCTACATTGATGGTGACAACGGGATCCTGCTGCACCGCGGCTATCCGATCGAACAACTGGCCGAGCAATCGGACTATCTGGAAACCTGCTATCTGCTGCTGAACGGCGAACTGCCAACCGCCGAGCAGAAAGCCCAGTTCGTTGTTGTCGTGAAAAACCACACCATGGTTCACGAACAGCTCAAGACCTTCTTCAACGGCTTCCGCCGCGACGCTCACCCGATGGCGGTGATGTGTGGCGTGGTGGGTGCCC
	31	BoreoHeathMossGrass	moss	moss from mixed stand - location_3	2018	ISL0284	CATTCTCACCGGCACCGTAGGCCCAGACGTGATCGACGTACGCGGTCTTACCGCCACCGGCCGCTTCACATTCGACCCAGGCTTCATGTCGACCGCCTCTTGCGAGTCGAAGATCACCTACATTGATGGTGACAACGGGATCCTGCTGCACCGCGGCTATCCGATCGAACAACTGGCCGAGCAATCGGACTATCTGGAAACCTGCTATCTGCTGCTGAACGGCGAACTGCCAACCGCCGAGCAGAAAGCCCAGTTCGTTGTTGTCGTGAAAAACCACACCATGGTTCACGAACAGCTCAAGACCTTCTTCAACGGCTTCCGCCGCGACGCTCACCCGATGGCGGTGATGTGTGGCGTGGTGGGTGCCC
	31	BoreoHeathMossGrass	moss	moss from mixed stand - location_3	2018	ISL0285	CATTCTCACCGGCACCGTAGGCCCAGACGTGATCGACGTACGCGGTCTTACCGCCACCGGCCGCTTCACATTCGACCCAGGCTTCATGTCGACCGCCTCTTGCGAGTCGAAGATCACCTACATTGATGGTGACAACGGGATCCTGCTGCACCGCGGCTATCCGATCGAACAACTGGCCGAGCAATCGGACTATCTGGAAACCTGCTATCTGCTGCTGAACGGCGAACTGCCAACCGCCGAGCAGAAAGCCCAGTTCGTTGTTGTCGTGAAAAACCACACCATGGTTCACGAACAGCTCAAGACCTTCTTCAACGGCTTCCGCCGCGACGCTCACCCGATGGCGGTGATGTGTGGCGTGGTGGGTGCCC
	31	BoreoHeathMossGrass	moss	moss from mixed stand - location_3	2018	ISL0286	CATTCTCACCGGCACCGTAGGCCCAGACGTGATCGACGTACGCGGTCTTACCGCCACCGGCCGCTTCACATTCGACCCAGGCTTCATGTCGACCGCCTCTTGCGAGTCGAAGATCACCTACATTGATGGTGACAACGGGATCCTGCTGCACCGCGGCTATCCGATCGAACAACTGGCCGAGCAATCGGACTATCTGGAAACCTGCTATCTGCTGCTGAACGGCGAACTGCCAACCGCCGAGCAGAAAGCCCAGTTCGTTGTTGTCGTGAAAAACCACACCATGGTTCACGAACAGCTCAAGACCTTCTTCAACGGCTTCCGCCGCGACGCTCACCCGATGGCGGTGATGTGTGGCGTGGTGGGTGCCC
	31	BoreoHeathMossGrass	moss	moss from mixed stand - location_3	2018	ISL0287	CATTCTCACCGGCACCGTAGGCCCAGACGTGATCGACGTACGCGGTCTTACCGCCACCGGCCGCTTCACATTCGACCCAGGCTTCATGTCGACCGCCTCTTGCGAGTCGAAGATCACCTACATTGATGGTGACAACGGGATCCTGCTGCACCGCGGCTATCCGATCGAACAACTGGCCGAGCAATCGGACTATCTGGAAACCTGCTATCTGCTGCTGAACGGCGAACTGCCAACCGCCGAGCAGAAAGCCCAGTTCGTTGTTGTCGTGAAAAACCACACCATGGTTCACGAACAGCTCAAGACCTTCTTCAACGGCTTCCGCCGCGACGCTCACCCGATGGCGGTGATGTGTGGCGTGGTGGGTGCCC
	31	BoreoHeathMossGrass	moss	moss from mixed stand - location_3	2018	ISL0291	CATTCTCACCGGCACCGTAGGCCCAGACGTGATCGACGTACGCGGTCTTACCGCCACCGGCCGCTTCACATTCGACCCAGGCTTCATGTCGACCGCCTCTTGCGAGTCGAAGATCACCTACATTGATGGTGACAACGGGATCCTGCTGCACCGCGGCTATCCGATCGAACAACTGGCCGAGCAATCGGACTATCTGGAAACCTGCTATCTGCTGCTGAACGGCGAACTGCCAACCGCCGAGCAGAAAGCCCAGTTCGTTGTTGTCGTGAAAAACCACACCATGGTTCACGAACAGCTCAAGACCTTCTTCAACGGCTTCCGCCGCGACGCTCACCCGATGGCGGTGATGTGTGGCGTGGTGGGTGCCC
	31	BoreoHeathMossGrass	moss	moss from mixed stand - location_3	2018	ISL0293	CATTCTCACCGGCACCGTAGGCCCAGACGTGATCGACGTACGCGGTCTTACCGCCACCGGCCGCTTCACATTCGACCCAGGCTTCATGTCGACCGCCTCTTGCGAGTCGAAGATCACCTACATTGATGGTGACAACGGGATCCTGCTGCACCGCGGCTATCCGATCGAACAACTGGCCGAGCAATCGGACTATCTGGAAACCTGCTATCTGCTGCTGAACGGCGAACTGCCAACCGCCGAGCAGAAAGCCCAGTTCGTTGTTGTCGTGAAAAACCACACCATGGTTCACGAACAGCTCAAGACCTTCTTCAACGGCTTCCGCCGCGACGCTCACCCGATGGCGGTGATGTGTGGCGTGGTGGGTGCCC
	31	BoreoHeathMossGrass	moss	moss from mixed stand - location_3	2018	ISL0294	CATTCTCACCGGCACCGTAGGCCCAGACGTGATCGACGTACGCGGTCTTACCGCCACCGGCCGCTTCACATTCGACCCAGGCTTCATGTCGACCGCCTCTTGCGAGTCGAAGATCACCTACATTGATGGTGACAACGGGATCCTGCTGCACCGCGGCTATCCGATCGAACAACTGGCCGAGCAATCGGACTATCTGGAAACCTGCTATCTGCTGCTGAACGGCGAACTGCCAACCGCCGAGCAGAAAGCCCAGTTCGTTGTTGTCGTGAAAAACCACACCATGGTTCACGAACAGCTCAAGACCTTCTTCAACGGCTTCCGCCGCGACGCTCACCCGATGGCGGTGATGTGTGGCGTGGTGGGTGCCC
	31	BoreoHeathMossGrass	moss	moss from mixed stand - location_3	2018	ISL0295	CATTCTCACCGGCACCGTAGGCCCAGACGTGATCGACGTACGCGGTCTTACCGCCACCGGCCGCTTCACATTCGACCCAGGCTTCATGTCGACCGCCTCTTGCGAGTCGAAGATCACCTACATTGATGGTGACAACGGGATCCTGCTGCACCGCGGCTATCCGATCGAACAACTGGCCGAGCAATCGGACTATCTGGAAACCTGCTATCTGCTGCTGAACGGCGAACTGCCAACCGCCGAGCAGAAAGCCCAGTTCGTTGTTGTCGTGAAAAACCACACCATGGTTCACGAACAGCTCAAGACCTTCTTCAACGGCTTCCGCCGCGACGCTCACCCGATGGCGGTGATGTGTGGCGTGGTGGGTGCCC
	31	BoreoHeathMossGrass	moss	moss from mixed stand - location_3	2018	ISL0296	CATTCTCACCGGCACCGTAGGCCCAGACGTGATCGACGTACGCGGTCTTACCGCCACCGGCCGCTTCACATTCGACCCAGGCTTCATGTCGACCGCCTCTTGCGAGTCGAAGATCACCTACATTGATGGTGACAACGGGATCCTGCTGCACCGCGGCTATCCGATCGAACAACTGGCCGAGCAATCGGACTATCTGGAAACCTGCTATCTGCTGCTGAACGGCGAACTGCCAACCGCCGAGCAGAAAGCCCAGTTCGTTGTTGTCGTGAAAAACCACACCATGGTTCACGAACAGCTCAAGACCTTCTTCAACGGCTTCCGCCGCGACGCTCACCCGATGGCGGTGATGTGTGGCGTGGTGGGTGCCC
	31	OroborealAlpineGlacier	plant	sparse mixed grass-2	2018	ISL0301	CATTCTCACCGGCACCGTAGGCCCAGACGTGATCGACGTACGCGGTCTTACCGCCACCGGCCGCTTCACATTCGACCCAGGCTTCATGTCGACCGCCTCTTGCGAGTCGAAGATCACCTACATTGATGGTGACAACGGGATCCTGCTGCACCGCGGCTATCCGATCGAACAACTGGCCGAGCAATCGGACTATCTGGAAACCTGCTATCTGCTGCTGAACGGCGAACTGCCAACCGCCGAGCAGAAAGCCCAGTTCGTTGTTGTCGTGAAAAACCACACCATGGTTCACGAACAGCTCAAGACCTTCTTCAACGGCTTCCGCCGCGACGCTCACCCGATGGCGGTGATGTGTGGCGTGGTGGGTGCCC
	31	BoreoHeathMossGrass	plant	wild grasses from mixed stand -location_4	2018	ISL0330	CATTCTCACCGGCACCGTAGGCCCAGACGTGATCGACGTACGCGGTCTTACCGCCACCGGCCGCTTCACATTCGACCCAGGCTTCATGTCGACCGCCTCTTGCGAGTCGAAGATCACCTACATTGATGGTGACAACGGGATCCTGCTGCACCGCGGCTATCCGATCGAACAACTGGCCGAGCAATCGGACTATCTGGAAACCTGCTATCTGCTGCTGAACGGCGAACTGCCAACCGCCGAGCAGAAAGCCCAGTTCGTTGTTGTCGTGAAAAACCACACCATGGTTCACGAACAGCTCAAGACCTTCTTCAACGGCTTCCGCCGCGACGCTCACCCGATGGCGGTGATGTGTGGCGTGGTGGGTGCCC
	31	BoreoHeathMossGrass	plant	wild grasses from mixed stand -location_4	2018	ISL0332	CATTCTCACCGGCACCGTAGGCCCAGACGTGATCGACGTACGCGGTCTTACCGCCACCGGCCGCTTCACATTCGACCCAGGCTTCATGTCGACCGCCTCTTGCGAGTCGAAGATCACCTACATTGATGGTGACAACGGGATCCTGCTGCACCGCGGCTATCCGATCGAACAACTGGCCGAGCAATCGGACTATCTGGAAACCTGCTATCTGCTGCTGAACGGCGAACTGCCAACCGCCGAGCAGAAAGCCCAGTTCGTTGTTGTCGTGAAAAACCACACCATGGTTCACGAACAGCTCAAGACCTTCTTCAACGGCTTCCGCCGCGACGCTCACCCGATGGCGGTGATGTGTGGCGTGGTGGGTGCCC
	31	BoreoHeathMossGrass	plant	wild grasses from mixed stand -location_4	2018	ISL0333	CATTCTCACCGGCACCGTAGGCCCAGACGTGATCGACGTACGCGGTCTTACCGCCACCGGCCGCTTCACATTCGACCCAGGCTTCATGTCGACCGCCTCTTGCGAGTCGAAGATCACCTACATTGATGGTGACAACGGGATCCTGCTGCACCGCGGCTATCCGATCGAACAACTGGCCGAGCAATCGGACTATCTGGAAACCTGCTATCTGCTGCTGAACGGCGAACTGCCAACCGCCGAGCAGAAAGCCCAGTTCGTTGTTGTCGTGAAAAACCACACCATGGTTCACGAACAGCTCAAGACCTTCTTCAACGGCTTCCGCCGCGACGCTCACCCGATGGCGGTGATGTGTGGCGTGGTGGGTGCCC
	31	BoreoHeathMossGrass	plant	wild grasses from mixed stand -location_4	2018	ISL0336	CATTCTCACCGGCACCGTAGGCCCAGACGTGATCGACGTACGCGGTCTTACCGCCACCGGCCGCTTCACATTCGACCCAGGCTTCATGTCGACCGCCTCTTGCGAGTCGAAGATCACCTACATTGATGGTGACAACGGGATCCTGCTGCACCGCGGCTATCCGATCGAACAACTGGCCGAGCAATCGGACTATCTGGAAACCTGCTATCTGCTGCTGAACGGCGAACTGCCAACCGCCGAGCAGAAAGCCCAGTTCGTTGTTGTCGTGAAAAACCACACCATGGTTCACGAACAGCTCAAGACCTTCTTCAACGGCTTCCGCCGCGACGCTCACCCGATGGCGGTGATGTGTGGCGTGGTGGGTGCCC
	31	BoreoHeathMossGrass	plant	wild grasses from mixed stand -location_4	2018	ISL0339	CATTCTCACCGGCACCGTAGGCCCAGACGTGATCGACGTACGCGGTCTTACCGCCACCGGCCGCTTCACATTCGACCCAGGCTTCATGTCGACCGCCTCTTGCGAGTCGAAGATCACCTACATTGATGGTGACAACGGGATCCTGCTGCACCGCGGCTATCCGATCGAACAACTGGCCGAGCAATCGGACTATCTGGAAACCTGCTATCTGCTGCTGAACGGCGAACTGCCAACCGCCGAGCAGAAAGCCCAGTTCGTTGTTGTCGTGAAAAACCACACCATGGTTCACGAACAGCTCAAGACCTTCTTCAACGGCTTCCGCCGCGACGCTCACCCGATGGCGGTGATGTGTGGCGTGGTGGGTGCCC
	31	BoreoHeathMossGrass	plant	wild grasses from mixed stand -location_4	2018	ISL0340	CATTCTCACCGGCACCGTAGGCCCAGACGTGATCGACGTACGCGGTCTTACCGCCACCGGCCGCTTCACATTCGACCCAGGCTTCATGTCGACCGCCTCTTGCGAGTCGAAGATCACCTACATTGATGGTGACAACGGGATCCTGCTGCACCGCGGCTATCCGATCGAACAACTGGCCGAGCAATCGGACTATCTGGAAACCTGCTATCTGCTGCTGAACGGCGAACTGCCAACCGCCGAGCAGAAAGCCCAGTTCGTTGTTGTCGTGAAAAACCACACCATGGTTCACGAACAGCTCAAGACCTTCTTCAACGGCTTCCGCCGCGACGCTCACCCGATGGCGGTGATGTGTGGCGTGGTGGGTGCCC
	31	BoreoHeathMossGrass	plant	wild grasses from mixed stand -location_4	2018	ISL0341	CATTCTCACCGGCACCGTAGGCCCAGACGTGATCGACGTACGCGGTCTTACCGCCACCGGCCGCTTCACATTCGACCCAGGCTTCATGTCGACCGCCTCTTGCGAGTCGAAGATCACCTACATTGATGGTGACAACGGGATCCTGCTGCACCGCGGCTATCCGATCGAACAACTGGCCGAGCAATCGGACTATCTGGAAACCTGCTATCTGCTGCTGAACGGCGAACTGCCAACCGCCGAGCAGAAAGCCCAGTTCGTTGTTGTCGTGAAAAACCACACCATGGTTCACGAACAGCTCAAGACCTTCTTCAACGGCTTCCGCCGCGACGCTCACCCGATGGCGGTGATGTGTGGCGTGGTGGGTGCCC
	31	BoreoHeathMossGrass	plant	wild grasses from mixed stand -location_4	2018	ISL0342	CATTCTCACCGGCACCGTAGGCCCAGACGTGATCGACGTACGCGGTCTTACCGCCACCGGCCGCTTCACATTCGACCCAGGCTTCATGTCGACCGCCTCTTGCGAGTCGAAGATCACCTACATTGATGGTGACAACGGGATCCTGCTGCACCGCGGCTATCCGATCGAACAACTGGCCGAGCAATCGGACTATCTGGAAACCTGCTATCTGCTGCTGAACGGCGAACTGCCAACCGCCGAGCAGAAAGCCCAGTTCGTTGTTGTCGTGAAAAACCACACCATGGTTCACGAACAGCTCAAGACCTTCTTCAACGGCTTCCGCCGCGACGCTCACCCGATGGCGGTGATGTGTGGCGTGGTGGGTGCCC
	31	BoreoHeathMossGrass	plant	wild grasses from mixed stand -location_4	2018	ISL0343	CATTCTCACCGGCACCGTAGGCCCAGACGTGATCGACGTACGCGGTCTTACCGCCACCGGCCGCTTCACATTCGACCCAGGCTTCATGTCGACCGCCTCTTGCGAGTCGAAGATCACCTACATTGATGGTGACAACGGGATCCTGCTGCACCGCGGCTATCCGATCGAACAACTGGCCGAGCAATCGGACTATCTGGAAACCTGCTATCTGCTGCTGAACGGCGAACTGCCAACCGCCGAGCAGAAAGCCCAGTTCGTTGTTGTCGTGAAAAACCACACCATGGTTCACGAACAGCTCAAGACCTTCTTCAACGGCTTCCGCCGCGACGCTCACCCGATGGCGGTGATGTGTGGCGTGGTGGGTGCCC
	31	BoreoHeathMossGrass	plant	wild grasses from mixed stand -location_4	2018	ISL0344	CATTCTCACCGGCACCGTAGGCCCAGACGTGATCGACGTACGCGGTCTTACCGCCACCGGCCGCTTCACATTCGACCCAGGCTTCATGTCGACCGCCTCTTGCGAGTCGAAGATCACCTACATTGATGGTGACAACGGGATCCTGCTGCACCGCGGCTATCCGATCGAACAACTGGCCGAGCAATCGGACTATCTGGAAACCTGCTATCTGCTGCTGAACGGCGAACTGCCAACCGCCGAGCAGAAAGCCCAGTTCGTTGTTGTCGTGAAAAACCACACCATGGTTCACGAACAGCTCAAGACCTTCTTCAACGGCTTCCGCCGCGACGCTCACCCGATGGCGGTGATGTGTGGCGTGGTGGGTGCCC
	31	BoreoHeathMossGrass	plant	wild grasses from mixed stand -location_4	2018	ISL0345	CATTCTCACCGGCACCGTAGGCCCAGACGTGATCGACGTACGCGGTCTTACCGCCACCGGCCGCTTCACATTCGACCCAGGCTTCATGTCGACCGCCTCTTGCGAGTCGAAGATCACCTACATTGATGGTGACAACGGGATCCTGCTGCACCGCGGCTATCCGATCGAACAACTGGCCGAGCAATCGGACTATCTGGAAACCTGCTATCTGCTGCTGAACGGCGAACTGCCAACCGCCGAGCAGAAAGCCCAGTTCGTTGTTGTCGTGAAAAACCACACCATGGTTCACGAACAGCTCAAGACCTTCTTCAACGGCTTCCGCCGCGACGCTCACCCGATGGCGGTGATGTGTGGCGTGGTGGGTGCCC
	31	BoreoHeathMossGrass	plant	wild grasses from mixed stand -location_4	2018	ISL0346	CATTCTCACCGGCACCGTAGGCCCAGACGTGATCGACGTACGCGGTCTTACCGCCACCGGCCGCTTCACATTCGACCCAGGCTTCATGTCGACCGCCTCTTGCGAGTCGAAGATCACCTACATTGATGGTGACAACGGGATCCTGCTGCACCGCGGCTATCCGATCGAACAACTGGCCGAGCAATCGGACTATCTGGAAACCTGCTATCTGCTGCTGAACGGCGAACTGCCAACCGCCGAGCAGAAAGCCCAGTTCGTTGTTGTCGTGAAAAACCACACCATGGTTCACGAACAGCTCAAGACCTTCTTCAACGGCTTCCGCCGCGACGCTCACCCGATGGCGGTGATGTGTGGCGTGGTGGGTGCCC
	31	BoreoHeathMossGrass	plant	wild grasses from mixed stand -location_4	2018	ISL0347	CATTCTCACCGGCACCGTAGGCCCAGACGTGATCGACGTACGCGGTCTTACCGCCACCGGCCGCTTCACATTCGACCCAGGCTTCATGTCGACCGCCTCTTGCGAGTCGAAGATCACCTACATTGATGGTGACAACGGGATCCTGCTGCACCGCGGCTATCCGATCGAACAACTGGCCGAGCAATCGGACTATCTGGAAACCTGCTATCTGCTGCTGAACGGCGAACTGCCAACCGCCGAGCAGAAAGCCCAGTTCGTTGTTGTCGTGAAAAACCACACCATGGTTCACGAACAGCTCAAGACCTTCTTCAACGGCTTCCGCCGCGACGCTCACCCGATGGCGGTGATGTGTGGCGTGGTGGGTGCCC
	31	BoreoHeathMossGrass	plant	wild grasses from mixed stand -location_4	2018	ISL0349	CATTCTCACCGGCACCGTAGGCCCAGACGTGATCGACGTACGCGGTCTTACCGCCACCGGCCGCTTCACATTCGACCCAGGCTTCATGTCGACCGCCTCTTGCGAGTCGAAGATCACCTACATTGATGGTGACAACGGGATCCTGCTGCACCGCGGCTATCCGATCGAACAACTGGCCGAGCAATCGGACTATCTGGAAACCTGCTATCTGCTGCTGAACGGCGAACTGCCAACCGCCGAGCAGAAAGCCCAGTTCGTTGTTGTCGTGAAAAACCACACCATGGTTCACGAACAGCTCAAGACCTTCTTCAACGGCTTCCGCCGCGACGCTCACCCGATGGCGGTGATGTGTGGCGTGGTGGGTGCCC
	31	BoreoHeathMossGrass	plant	wild grasses from mixed stand -location_4	2018	ISL0351	CATTCTCACCGGCACCGTAGGCCCAGACGTGATCGACGTACGCGGTCTTACCGCCACCGGCCGCTTCACATTCGACCCAGGCTTCATGTCGACCGCCTCTTGCGAGTCGAAGATCACCTACATTGATGGTGACAACGGGATCCTGCTGCACCGCGGCTATCCGATCGAACAACTGGCCGAGCAATCGGACTATCTGGAAACCTGCTATCTGCTGCTGAACGGCGAACTGCCAACCGCCGAGCAGAAAGCCCAGTTCGTTGTTGTCGTGAAAAACCACACCATGGTTCACGAACAGCTCAAGACCTTCTTCAACGGCTTCCGCCGCGACGCTCACCCGATGGCGGTGATGTGTGGCGTGGTGGGTGCCC
	31	BoreoHeathMossGrass	plant	wild grasses from mixed stand -location_4	2018	ISL0352	CATTCTCACCGGCACCGTAGGCCCAGACGTGATCGACGTACGCGGTCTTACCGCCACCGGCCGCTTCACATTCGACCCAGGCTTCATGTCGACCGCCTCTTGCGAGTCGAAGATCACCTACATTGATGGTGACAACGGGATCCTGCTGCACCGCGGCTATCCGATCGAACAACTGGCCGAGCAATCGGACTATCTGGAAACCTGCTATCTGCTGCTGAACGGCGAACTGCCAACCGCCGAGCAGAAAGCCCAGTTCGTTGTTGTCGTGAAAAACCACACCATGGTTCACGAACAGCTCAAGACCTTCTTCAACGGCTTCCGCCGCGACGCTCACCCGATGGCGGTGATGTGTGGCGTGGTGGGTGCCC
	31	BoreoHeathMossGrass	plant	wild grasses from mixed stand -location_4	2018	ISL0354	CATTCTCACCGGCACCGTAGGCCCAGACGTGATCGACGTACGCGGTCTTACCGCCACCGGCCGCTTCACATTCGACCCAGGCTTCATGTCGACCGCCTCTTGCGAGTCGAAGATCACCTACATTGATGGTGACAACGGGATCCTGCTGCACCGCGGCTATCCGATCGAACAACTGGCCGAGCAATCGGACTATCTGGAAACCTGCTATCTGCTGCTGAACGGCGAACTGCCAACCGCCGAGCAGAAAGCCCAGTTCGTTGTTGTCGTGAAAAACCACACCATGGTTCACGAACAGCTCAAGACCTTCTTCAACGGCTTCCGCCGCGACGCTCACCCGATGGCGGTGATGTGTGGCGTGGTGGGTGCCC
	31	BoreoHeathMossGrass	plant	wild grasses from mixed stand -location_4	2018	ISL0356	CATTCTCACCGGCACCGTAGGCCCAGACGTGATCGACGTACGCGGTCTTACCGCCACCGGCCGCTTCACATTCGACCCAGGCTTCATGTCGACCGCCTCTTGCGAGTCGAAGATCACCTACATTGATGGTGACAACGGGATCCTGCTGCACCGCGGCTATCCGATCGAACAACTGGCCGAGCAATCGGACTATCTGGAAACCTGCTATCTGCTGCTGAACGGCGAACTGCCAACCGCCGAGCAGAAAGCCCAGTTCGTTGTTGTCGTGAAAAACCACACCATGGTTCACGAACAGCTCAAGACCTTCTTCAACGGCTTCCGCCGCGACGCTCACCCGATGGCGGTGATGTGTGGCGTGGTGGGTGCCC
	31	BoreoHeathMossGrass	moss	moss from mixed stand - location_4	2018	ISL0359	CATTCTCACCGGCACCGTAGGCCCAGACGTGATCGACGTACGCGGTCTTACCGCCACCGGCCGCTTCACATTCGACCCAGGCTTCATGTCGACCGCCTCTTGCGAGTCGAAGATCACCTACATTGATGGTGACAACGGGATCCTGCTGCACCGCGGCTATCCGATCGAACAACTGGCCGAGCAATCGGACTATCTGGAAACCTGCTATCTGCTGCTGAACGGCGAACTGCCAACCGCCGAGCAGAAAGCCCAGTTCGTTGTTGTCGTGAAAAACCACACCATGGTTCACGAACAGCTCAAGACCTTCTTCAACGGCTTCCGCCGCGACGCTCACCCGATGGCGGTGATGTGTGGCGTGGTGGGTGCCC
	31	BoreoHeathMossGrass	moss	moss from mixed stand - location_4	2018	ISL0366	CATTCTCACCGGCACCGTAGGCCCAGACGTGATCGACGTACGCGGTCTTACCGCCACCGGCCGCTTCACATTCGACCCAGGCTTCATGTCGACCGCCTCTTGCGAGTCGAAGATCACCTACATTGATGGTGACAACGGGATCCTGCTGCACCGCGGCTATCCGATCGAACAACTGGCCGAGCAATCGGACTATCTGGAAACCTGCTATCTGCTGCTGAACGGCGAACTGCCAACCGCCGAGCAGAAAGCCCAGTTCGTTGTTGTCGTGAAAAACCACACCATGGTTCACGAACAGCTCAAGACCTTCTTCAACGGCTTCCGCCGCGACGCTCACCCGATGGCGGTGATGTGTGGCGTGGTGGGTGCCC
	31	BoreoHeathMossGrass	moss	moss from mixed stand - location_4	2018	ISL0373	CATTCTCACCGGCACCGTAGGCCCAGACGTGATCGACGTACGCGGTCTTACCGCCACCGGCCGCTTCACATTCGACCCAGGCTTCATGTCGACCGCCTCTTGCGAGTCGAAGATCACCTACATTGATGGTGACAACGGGATCCTGCTGCACCGCGGCTATCCGATCGAACAACTGGCCGAGCAATCGGACTATCTGGAAACCTGCTATCTGCTGCTGAACGGCGAACTGCCAACCGCCGAGCAGAAAGCCCAGTTCGTTGTTGTCGTGAAAAACCACACCATGGTTCACGAACAGCTCAAGACCTTCTTCAACGGCTTCCGCCGCGACGCTCACCCGATGGCGGTGATGTGTGGCGTGGTGGGTGCCC
	31	BoreoHeathMossGrass	moss	moss from mixed stand - location_4	2018	ISL0386	CATTCTCACCGGCACCGTAGGCCCAGACGTGATCGACGTACGCGGTCTTACCGCCACCGGCCGCTTCACATTCGACCCAGGCTTCATGTCGACCGCCTCTTGCGAGTCGAAGATCACCTACATTGATGGTGACAACGGGATCCTGCTGCACCGCGGCTATCCGATCGAACAACTGGCCGAGCAATCGGACTATCTGGAAACCTGCTATCTGCTGCTGAACGGCGAACTGCCAACCGCCGAGCAGAAAGCCCAGTTCGTTGTTGTCGTGAAAAACCACACCATGGTTCACGAACAGCTCAAGACCTTCTTCAACGGCTTCCGCCGCGACGCTCACCCGATGGCGGTGATGTGTGGCGTGGTGGGTGCCC
	31	BoreoHeathMossGrass	moss	moss from mixed stand - location_4	2018	ISL0390	CATTCTCACCGGCACCGTAGGCCCAGACGTGATCGACGTACGCGGTCTTACCGCCACCGGCCGCTTCACATTCGACCCAGGCTTCATGTCGACCGCCTCTTGCGAGTCGAAGATCACCTACATTGATGGTGACAACGGGATCCTGCTGCACCGCGGCTATCCGATCGAACAACTGGCCGAGCAATCGGACTATCTGGAAACCTGCTATCTGCTGCTGAACGGCGAACTGCCAACCGCCGAGCAGAAAGCCCAGTTCGTTGTTGTCGTGAAAAACCACACCATGGTTCACGAACAGCTCAAGACCTTCTTCAACGGCTTCCGCCGCGACGCTCACCCGATGGCGGTGATGTGTGGCGTGGTGGGTGCCC
	31	BoreoHeathMossGrass	moss	moss from mixed stand - location_4	2018	ISL0392	CATTCTCACCGGCACCGTAGGCCCAGACGTGATCGACGTACGCGGTCTTACCGCCACCGGCCGCTTCACATTCGACCCAGGCTTCATGTCGACCGCCTCTTGCGAGTCGAAGATCACCTACATTGATGGTGACAACGGGATCCTGCTGCACCGCGGCTATCCGATCGAACAACTGGCCGAGCAATCGGACTATCTGGAAACCTGCTATCTGCTGCTGAACGGCGAACTGCCAACCGCCGAGCAGAAAGCCCAGTTCGTTGTTGTCGTGAAAAACCACACCATGGTTCACGAACAGCTCAAGACCTTCTTCAACGGCTTCCGCCGCGACGCTCACCCGATGGCGGTGATGTGTGGCGTGGTGGGTGCCC
	31	BoreoHeathMossGrass	moss	moss from mixed stand - location_4	2018	ISL0394	CATTCTCACCGGCACCGTAGGCCCAGACGTGATCGACGTACGCGGTCTTACCGCCACCGGCCGCTTCACATTCGACCCAGGCTTCATGTCGACCGCCTCTTGCGAGTCGAAGATCACCTACATTGATGGTGACAACGGGATCCTGCTGCACCGCGGCTATCCGATCGAACAACTGGCCGAGCAATCGGACTATCTGGAAACCTGCTATCTGCTGCTGAACGGCGAACTGCCAACCGCCGAGCAGAAAGCCCAGTTCGTTGTTGTCGTGAAAAACCACACCATGGTTCACGAACAGCTCAAGACCTTCTTCAACGGCTTCCGCCGCGACGCTCACCCGATGGCGGTGATGTGTGGCGTGGTGGGTGCCC
	32	GrazedPasture	plant	farm grass_1	2018	ISL0023	CCATTCTCACCGGCACCGTAGGCCCCGACGTGATCGACGTACGTGGTCTCACAGCCACCGGCCGCTTCACATTCGACCCAGGCTTCATGTCGACCGCCTCTTGCGAGTCGAAGATCACCTACATTGATGGTGACAACGGGATCCTGCTGCACCGCGGCTATCCGATCGAACAACTGGCCGAGCAATCGGACTATCTGGAAACCTGCTATCTGCTGCTGAACGGCGAACTGCCAACCGCCGAGCAGAAAGCCCAGTTCGTTGTCGTCGTGAAGAACCACACCATGGTTCACGAACAGCTCAAGACCTTCTTCAACGGCTTCCGCCGCGACGCTCACCCGATGGCGGTGATGTGTGGGGTGGTGGGTGCCC
	32	GrazedPasture	plant	farm grass_1	2018	ISL0025	CCATTCTCACCGGCACCGTAGGCCCCGACGTGATCGACGTACGTGGTCTCACAGCCACCGGCCGCTTCACATTCGACCCAGGCTTCATGTCGACCGCCTCTTGCGAGTCGAAGATCACCTACATTGATGGTGACAACGGGATCCTGCTGCACCGCGGCTATCCGATCGAACAACTGGCCGAGCAATCGGACTATCTGGAAACCTGCTATCTGCTGCTGAACGGCGAACTGCCAACCGCCGAGCAGAAAGCCCAGTTCGTTGTCGTCGTGAAGAACCACACCATGGTTCACGAACAGCTCAAGACCTTCTTCAACGGCTTCCGCCGCGACGCTCACCCGATGGCGGTGATGTGTGGGGTGGTGGGTGCCC
	33	GrazedPasture	plant	farm grass_1	2018	ISL0008	CATTCTCACCGGCACCGTAGGCCCCGACGTGATCGACGTACGTGGTCTCACAGCCACCGGCCGCTTCACATTCGACCCAGGCTTCATGTCGACCGCCTCTTGCGAGTCGAAGATCACCTACATTGATGGTGACAACGGGATCCTGCTGCACCGCGGCTATCCGATCGAACAACTGGCCGAGCAATCGGACTACCTGGAAACGTGCTATCTGCTACTGAACGGCGAGCTGCCAACCGCCGAGCAGAAAGCCCAGTTCGTTGTTGTCGTGAAAAACCACACCATGGTTCACGAACAGCTCAAGACCTTTTTCAACGGCTTCCGCCGCGACGCTCACCCGATGGCGGTGATGTGTGGTGTGGTGGGTGCCC
	33	GrazedPasture	plant	pasture grass and clover	2018	ISL0409	CATTCTCACCGGCACCGTAGGCCCCGACGTGATCGACGTACGTGGTCTCACAGCCACCGGCCGCTTCACATTCGACCCAGGCTTCATGTCGACCGCCTCTTGCGAGTCGAAGATCACCTACATTGATGGTGACAACGGGATCCTGCTGCACCGCGGCTATCCGATCGAACAACTGGCCGAGCAATCGGACTACCTGGAAACGTGCTATCTGCTACTGAACGGCGAGCTGCCAACCGCCGAGCAGAAAGCCCAGTTCGTTGTTGTCGTGAAAAACCACACCATGGTTCACGAACAGCTCAAGACCTTTTTCAACGGCTTCCGCCGCGACGCTCACCCGATGGCGGTGATGTGTGGTGTGGTGGGTGCCC
	34	GrazedPasture	plant	pasture grass and clover	2018	ISL0411	CATTCTCACCGGCACCGTAGGCCCCGACGTGATCGACGTACGTGGTCTCACAGCCACCGGCCGCTTCACATTCGACCCAGGCTTCATGTCGACCGCCTCTTGCGAGTCGAAGATCACCTACATTGATGGTGACAACGGGATCCTGCTGCACCGCGGCTATCCGATCGAACAACTGGCCGAGCAATCGGACTACCTGGAAACCTGCTATCTGCTGCTGAACGGCGAACTGCCAACCGCCGAGCAGAAAGCCCAGTTCGTTGTTGTCGTGAAGAACCACACCATGGTTCACGAACAGCTCAAGACCTTCTTCAACGGCTTCCGCCGCGACGCTCACCCGATGGCGGTGATGTGTGGTGTGGTGGGTGCCC
	34	GrazedPasture	plant	pasture grass-2	2018	ISL0453	CATTCTCACCGGCACCGTAGGCCCCGACGTGATCGACGTACGTGGTCTCACAGCCACCGGCCGCTTCACATTCGACCCAGGCTTCATGTCGACCGCCTCTTGCGAGTCGAAGATCACCTACATTGATGGTGACAACGGGATCCTGCTGCACCGCGGCTATCCGATCGAACAACTGGCCGAGCAATCGGACTACCTGGAAACCTGCTATCTGCTGCTGAACGGCGAACTGCCAACCGCCGAGCAGAAAGCCCAGTTCGTTGTTGTCGTGAAGAACCACACCATGGTTCACGAACAGCTCAAGACCTTCTTCAACGGCTTCCGCCGCGACGCTCACCCGATGGCGGTGATGTGTGGTGTGGTGGGTGCCC
	35	OroborealAlpineGlacier	plant	litter on forest floor	2018	ISL0255	CATTCTCACCGGCACCGTAGGCCCCGACGTGATCGACGTACGTGGTCTCACAGCCACCGGCCGCTTCACATTCGACCCAGGCTTCATGTCGACCGCCTCTTGCGAGTCGAAGATCACCTACATTGATGGTGACAACGGGATCCTGCTGCACCGCGGCTATCCGATCGAACAACTGGCCGAGCAATCGGACTATCTGGAAACCTGCTATCTGCTGCTGAACGGCGAACTGCCAACCGCCGAGCAGAAAGCCCAGTTCGTTGTTGTCGTGAAAAACCACACCATGGTTCACGAACAGCTCAAGACCTTTTTCAACGGCTTCCGCCGCGACGCTCACCCGATGGCGGTGATGTGTGGTGTGGTGGGTGCCC
	35	OroborealAlpineGlacier	plant	litter on forest floor	2018	ISL0257	CATTCTCACCGGCACCGTAGGCCCCGACGTGATCGACGTACGTGGTCTCACAGCCACCGGCCGCTTCACATTCGACCCAGGCTTCATGTCGACCGCCTCTTGCGAGTCGAAGATCACCTACATTGATGGTGACAACGGGATCCTGCTGCACCGCGGCTATCCGATCGAACAACTGGCCGAGCAATCGGACTATCTGGAAACCTGCTATCTGCTGCTGAACGGCGAACTGCCAACCGCCGAGCAGAAAGCCCAGTTCGTTGTTGTCGTGAAAAACCACACCATGGTTCACGAACAGCTCAAGACCTTTTTCAACGGCTTCCGCCGCGACGCTCACCCGATGGCGGTGATGTGTGGTGTGGTGGGTGCCC
	35	OroborealAlpineGlacier	plant	litter on forest floor	2018	ISL0259	CATTCTCACCGGCACCGTAGGCCCCGACGTGATCGACGTACGTGGTCTCACAGCCACCGGCCGCTTCACATTCGACCCAGGCTTCATGTCGACCGCCTCTTGCGAGTCGAAGATCACCTACATTGATGGTGACAACGGGATCCTGCTGCACCGCGGCTATCCGATCGAACAACTGGCCGAGCAATCGGACTATCTGGAAACCTGCTATCTGCTGCTGAACGGCGAACTGCCAACCGCCGAGCAGAAAGCCCAGTTCGTTGTTGTCGTGAAAAACCACACCATGGTTCACGAACAGCTCAAGACCTTTTTCAACGGCTTCCGCCGCGACGCTCACCCGATGGCGGTGATGTGTGGTGTGGTGGGTGCCC
	35	OroborealAlpineGlacier	plant	litter on forest floor	2018	ISL0261	CATTCTCACCGGCACCGTAGGCCCCGACGTGATCGACGTACGTGGTCTCACAGCCACCGGCCGCTTCACATTCGACCCAGGCTTCATGTCGACCGCCTCTTGCGAGTCGAAGATCACCTACATTGATGGTGACAACGGGATCCTGCTGCACCGCGGCTATCCGATCGAACAACTGGCCGAGCAATCGGACTATCTGGAAACCTGCTATCTGCTGCTGAACGGCGAACTGCCAACCGCCGAGCAGAAAGCCCAGTTCGTTGTTGTCGTGAAAAACCACACCATGGTTCACGAACAGCTCAAGACCTTTTTCAACGGCTTCCGCCGCGACGCTCACCCGATGGCGGTGATGTGTGGTGTGGTGGGTGCCC
	35	OroborealAlpineGlacier	plant	litter on forest floor	2018	ISL0264	CATTCTCACCGGCACCGTAGGCCCCGACGTGATCGACGTACGTGGTCTCACAGCCACCGGCCGCTTCACATTCGACCCAGGCTTCATGTCGACCGCCTCTTGCGAGTCGAAGATCACCTACATTGATGGTGACAACGGGATCCTGCTGCACCGCGGCTATCCGATCGAACAACTGGCCGAGCAATCGGACTATCTGGAAACCTGCTATCTGCTGCTGAACGGCGAACTGCCAACCGCCGAGCAGAAAGCCCAGTTCGTTGTTGTCGTGAAAAACCACACCATGGTTCACGAACAGCTCAAGACCTTTTTCAACGGCTTCCGCCGCGACGCTCACCCGATGGCGGTGATGTGTGGTGTGGTGGGTGCCC
	35	OroborealAlpineGlacier	plant	litter on forest floor	2018	ISL0266	CATTCTCACCGGCACCGTAGGCCCCGACGTGATCGACGTACGTGGTCTCACAGCCACCGGCCGCTTCACATTCGACCCAGGCTTCATGTCGACCGCCTCTTGCGAGTCGAAGATCACCTACATTGATGGTGACAACGGGATCCTGCTGCACCGCGGCTATCCGATCGAACAACTGGCCGAGCAATCGGACTATCTGGAAACCTGCTATCTGCTGCTGAACGGCGAACTGCCAACCGCCGAGCAGAAAGCCCAGTTCGTTGTTGTCGTGAAAAACCACACCATGGTTCACGAACAGCTCAAGACCTTTTTCAACGGCTTCCGCCGCGACGCTCACCCGATGGCGGTGATGTGTGGTGTGGTGGGTGCCC
	singleton	forest	moss	Hylocomium splendens	2020	EG2002_22	CAATTCTGACGGGTACAGTGGGTCCGGACGTGATCGACGTACGCGGTCTCACCGCCACCGGCCGCTTCACATTTGACCCTGGCTTCATGTCCACGGCATCTTGCGAGTCGAAGATCACCTACATCGATGGCGATAACGGAATCCTGCTTCACCGCGGCTACCCGATCGAACAACTGGCCGAGCAGTCCGATTATCTGGAAACCTGCTACCTGCTGCTCAATGGCGAATTGCCAACAGCCGAGCAGAAAGCCCAGTTCGTTGCCGTGGTCAAGAACCACACGATGGTTCACGAACAGCTCAAGACCTTTTTCAACGGCTTCCGTTGTGATGCCCACCCGATGGCCGTCATGTGCGGCGTAGTCGGCGCCC
	singleton	forest	moss	Hylocomium splendens	2020	EG2002_28	CAATTCTGACGGGTACAGTGGGTCCGGACGTGATCGACGTACGCGGTCTCACCGCCACCGGCCGCTTCACATTTGACCCTGGCTTCATGTCCACGGCATCTTGCGAGTCGAAGATCACCTACATCGATGGTGATAACGGAATCCTGCTTCACCGCGGCTACCCGATCGAGCAACTGGCCGAGCAGTCCGATTATCTGGAAACCTGCTACCTGCTGCTCAACGGCGAACTGCCAACTGCCGAGCAGAAAGCCCAGTTCGTTGCCGTGGTCAAGAACCACACGATGGTTCACGAACAGCTCAAGACCTTTTTCAACGGCTTCCGCCGTGATGCCCACCCGATGGCCGTCATGTGCGGCGTGGTCGGTGCCC
	singleton	forest	plant	mixed grasses	2020	EG2003_20	CAATTCTGACGGGTACAGTGGGTCCGGACGTGATCGACGTACGCGGTCTCACCGCCACCGGCCGCTTCACATTTGACCCTGGCTTCATGTCCACGGCATCTTGCGAGTCGAAGATCACCTACATCGATGGCGATAACGGAATCCTGCTTCACCGCGGCTACCCGATCGAACAACTGGCCGAGCAGTCCGATTATCTGGAAACCTGCTACCTGCTGCTCAATGGCGAATTACCAACAGCCGAGCAGAAAGCCCAGTTCGTTGCCGTGGTCAAGAACCACACGATGGTTCACGAACAGCTCAAGACCTTTTTCAACGGCTTCCGTCGTGATGCCCACCCGATGGCCGTCATGTGCGGTGTAGTCGGCGCCC
	singleton	forest	plant	Empetrum nigrum	2020	EG2005_15	CAATTCCGACGGGTACAGTGGGTCCGGACGTGATCGACGTACGCGGTCTCACCGCCACCGGCCGCTTCACATTCGACCCTGGCTTCATGTCCACGGCATCTTGCGAGTCGAAGATCACCTACATCGATGGCGATAACGGAATCCTGCTTCACCGCGGCTACCCGATCGAACAACTGGCCGAGCAGTCCGATTATCTGGAAACCTGCTACCTGCTGCTCAATGGCGAATTGCCAACAGCCGAGCAGAAAGCCCAGTTCGTTGCCGTGGTCAAGAACCACACGATGGTTCACGAACAGCTCAAGACCTTTTTCAACGGCTTCCGTTGTGATGCCCACCCGATGGCCGTCATGTGCGGTGTAGTCGGCGCCC
	singleton	forest	moss	Hylocomium splendens	2020	EG2007_21	CAATTCTGACGGGTACAGTGGGTCCGGACGTGATCGACGTACGCGGTCTCACCGCCACCGGCCGCTTCACATTTGACCCTGGCTTCATGTCCACGGCATCTTGCGAGTCGAAGATCACCTACATCGATGGTGATAACGGAATCCTGCTTCACCGCGGCTACCCGATCGAACAACTGGCCGAGCAGTCCGATTATCTGGAAACCTGCTACCTGCTGCTCAATGGCGAATTGCCAACAGCCGAGCAGAAAGCCCAGTTCGTTGCCGTGGTCAAGATCCACACGATGGTTCACGAACAGCTCAAGACCTTTTTCAACGGCTTCCGTCGTGATGCCCACCCGATGGCCGTCATGTGCGGTGTAGTCGGCGCCC
	singleton	forest	fern	Equisetum pratense	2020	EG2008_08	CAATTCTGACGGGTACAGTGGGTCCGGACGTGATCGACGTACGCGGTCTCACCGCCACCGGCCGCTTCACATTTGACCCTGGCTTCATGTCCACGGCATCTTGCGAGTCGAAGATCACCTACATCGATGGTGATAACGGAATCCTGCTTCACCGCGGCTACCCGATCGAACAACTGGCCGAGCAGTCCGATTATCTGGAAACCTGCTACCTGCTGCTCAATGGCGAATTGCCAACAGCCGAGCAGAAAGCCCAGTTCGTTGCCGTGGTCAAGATCCACACGATGGTTCACGAACAGCTCAAGACCTTTTTCAACGGCTTCCGTCGTGATGCCCACCCGATGGCCGTCATGTGCGGTGTAGTCGGCGCCC
	singleton	forest	fern	Equisetum pratense	2020	EG2008_22	CAATTCTGACGGGTACAGTGGGTCCGGACGTGATCGACGTACGCGGTCTCACCGCCACCGGCCGCTTCACATTTGACCCTGGCTTCATGTCCACGGCATCTTGCGAGTCGAAGATCACCTACATCGATGGTGATAACGGAATCCTGCTTCACCGCGGCTACCCGATCGAACAACTGGCCGAGCAGTCCGATTATCTGGAAACCTGCTACCTGCTGCTCAATGGCGAATTGCCAACAGCCGAGCAGAAAGCCCAGTTCGTTGCCGTGGTCAAGAACCACACGATGGTTCACGAACAGCTCAAGACCTTTTTCAACGGCTTCCGTCGTGATGCCCACCCGATGGACGTCATGTGCGGTGTAGTCGGCGCCC
	singleton	forest	fern	Equisetum pratense	2020	EG2008_25	CAATTCTGACGGGTACAGTGGGTCCGGACGTGATCGACGTACGCGGTCTCACCGCCACCGGCCGCTTCACATTTGACCCTGGCTTCATGTCCACGGCATCTTGCGAGTCGAAGATCACCTACATCGATGGTGATAACGGAATCCTGCTTCACCGCGGCTACCCGATCGAACAACTGGCCGAGCAGTCCGATTATCTGGAAACCTGCTACCTGCTGCTCAATGGCGAATTGCCAACAGCCGAGCAGAAAGCCCAGTTCGTTGCCGTGGTCAAGAACCACACGATGGTTCACGAACAGCTCAAGACCTTTTTCAACGGCTTCCGTCTTGATGCCCACCCGATGGCCGTCATGTGCGGTGTAGTCGGCGCCC
	singleton	forest	plant	Rubus saxatilis	2020	EG2011_19	CAATACTGACCGGTACAGTGGGTCCGGACGTGATCGACGTACGCGGTCTGACCGCCACCGGCCGCTTCACATTTGACCCTGGCTTCATGTCCACGGCCTCTTGCGAGTCGAAGATCACCTACATTGATGGTGACAACGGAATTCTGCTGCACCGCGGCTACCCGATCGAACAACTGGCCGAGCAGTCCGATTACCTCGAGACCTGCTACCTGTTGCTCAACGGCGAGCTGCCAACCGCCGAACAGAAAGCCCAGTTCGTGGCTGTGGTCAAGAACCACACGATGGTTCACGAACAACTCAAGACCTTCTTCAACGGCTTTCGCCGTGACGCCCACCCGATGGCCGTCATGTGCGGTGTAGTCGGCGCCC
	singleton	forest	plant	Salix arctica	2020	EG2015_17	CAATTCTGACGGGTACAGTGGGTCCGGACGTGATCGACGTACGCGGTCTCACCGCCACCGGCCGCTTCACATTTGACCCTGGCTTCATGTCCACGGCATCTTGCGAGTCGAAGATCACCTACATCGACGGTGATAACGGAATCCTGCTTCACCGCGGCTACCCGATCGAACAACTGGCCGAGCAGTCCGATTACCTGGAAACCTGCTACCTGTTGCTCAATGGCGAATTGCCAACTGCCGAGCAGAAAGCCCAGTTCGTTGCTGTGGTCAAGAACCACACGATGGTTCACGAACAGCTCAAGACCTTTTTCAACGGCTTCCGCCGTGATGCCCACCCGATGGCCGTCATGTGCGGCGTAGTCGGCGCCC
	singleton	forest	moss	Rhytidiadelphus squarrosus	2020	EG2016_19	CAATTCTGACCGGTACAGTGGGTCCGGACGTGATCGACGTACGCGGTCTGACCGCCACCGGCCGCTTCACATTTGACCCTGGCTTCATGTCCACGGCCTCTTGCGAGTCGAAGATCACCTACATTGATGGTGACAACGGAATTCTGCTGCACCGCGGCTACCCGATCGAACAACTGGCCGAGCAGTCCGATTACCTCGAGACCTGCTACCTGTTGCTCAACGGCGAGCTGCCAACCGCCGAACAGAAAGCCCAGTTCGTGGCCGTGGTCAAGAACCACACGATGGTTCACGAACAACTCAAGACCTTCTTCAACGGCTTTCGCCGTGACGCCCACCCGATGGCCGTCATGTGCGGTGTAGTCGGCGCCC
	singleton	forest	plant	Vaccinium uliginosum_x000D_	2020	EG2018_11	CAATTCTGACGGGTACAGTGGGTCCGGACGTGATCGACGTACGCGGTCTCACCGCCACCGGCCGCTTCACATTTGACCCTGGCTTCATGTCCACGGCATCTTGCGAGTCGAAGATCACCTACATCGACGGTGATAACGGAATCCTGCTTCACCGCGGCTACCCGATCGAACAACTGGCCGAGCAGTCCGATTACCTGGAAACCTGCTACCTGTTGCTCAATGGCGAATTGCCAACTGCCGAGCAGAAAGCCCAGTTCGTTGCCGTGGTCAAGAACCACACGTAGTGGTTCACGAACAGTCTCAAGACCATTTTTCAACGGCTTCCGCCGCTGATGCCCACCCGATGGCCGTCATGTGCGGCGCAGGCGGCGCCC
	singleton	forest	plant	Vaccinium uliginosum_x000D_	2020	EG2018_12	CAATTCTGACGGGTACAGTGGGTCCGGACGTGATCGACGTACGCGGTCTCACCGCCACCGGCCGCTTCACATTTGACCCTGGCTTCATGTACACGGAATCTTGCGAGTCGAAGATCACCTACATCGACGGTGATAACGGAATCCTGCTTCACCGCGGCTACCCGATCGAACAACTGGCCGAGCAGTCCGATTACCTGGAAACCTGCTACCTGTTGCTCAATGGCGAATTGCCAACTGCCGAGCAGAAAGCCCAGTTCGTTGCCGTGGTCAAGAACCACACGATGGTTCACGAACAGCTCAAGACCTTTTTCAACGGCTTCCGCCGTGATGCCCACCCGATGGCCGTCATGTGCGGCGTAGTCGGCGCCC
	singleton	forest	plant	Vaccinium uliginosum_x000D_	2020	EG2018_18	CAATTCTGACGGGTACAGTGGGTCCGGACGTGATCGACGTACGCGGTCTCACCGCCACCGGCCGCTTCACATTTGACCCTGGCTTCATGTCCACGGCATCTTGCGAGTCGAAGATCACCTACATCGACGGTGATAACGGAATCCTGCTTCACCGCGGCTACCCGATCGAACAACTGGCCGAGCAGTCCGATTACCTGGAAACCTGCTACCTGTTGCTCAATGGCGAATTGCCAACTGCCGAGCAGAAAGCCCAGTTCGTTGCCGTGGTCAAGAACCACACGATGGTTCACGAACAGCTCAAGACCTTTTTCAACGGCTTCCGCCGTGATGCCCACCCGATGGCCGTCATGTGCGGCGTAGGCGGCGCCC
	singleton	forest	plant	Vaccinium uliginosum_x000D_	2020	EG2018_25	CAATTCTGACGGGTACAGTGGGTCCGGACGTGATCGACGTACGCGGTCTCACCGCCACCCGGCCGCTTCACATTTGACCCTGGCTTCATGTCCACGGCATCTTTGCGAGTCGAAGATCACCCTACATCGATGGTGGATAAACGGAATCCTGCTTCACCGCCGGCTACCCGATCGAGCAAACTGGCCGAGCAGTCCGATTATCTGGAAACCTGCTACCTGCTGCTCAATGGCGAACTGCCAAACTGCCGAGCAGAAAGCCCAGTTCGTTGCCGTGGTCAAAGAACCACCACGATGGTTCACGAACAGCTCAAGACCTTTTTCAACGGCTTCCGCCGTGATGCCCACCCGATGGCCGTCATGTGCGGCGTGGTCGGTGCCC
	singleton	forest	plant	Vaccinium uliginosum_x000D_	2020	EG2018_28	CAATTCTGACGGGTACAGTGGGTCCGGACGTGATCGACGTACGCGGTCTCATCGGCACCGGCCGCTTCACATTTGACCCTGGCTTCATGTTCACGGCATCTTGCGAGTCGAAGATCACCTACATCGACGGTGATAACGGAATCCTGCTTCACCGCGGCTACCCGATCGAACAACTGGCCGAGCAGTCCGATTACCTGGAAACCTGCTACCTGTTGCTCAATGGCGAATTGCCAACTGCCGAGCAGAAAGCCCAGTTCGTTGCCGTGGTCAAGAACCACACGATGGTTCACGAACAGCTCAAGACCTTTTTCAACGGCTTCCGCCGTGATGCCCACCCGATGGCCGTCATGTGCGGCGTAGTCGGCGCCC
	singleton	forest	moss	Rhytidiadelphus loreus	2020	EG2019_15	CAATTCTGACCGGTACAGTGGGTCCGGACGTGATCGACGTACGCGGCCTGACCGCCACCGGCCGCTTCACATTTGACCCTGGTTTCATGTCCACGGCCTCTTGCGATTCGAAGATCACCTACATCGATGGTGATAATGGCATTCTGCTACACCGCGGCTACCCGATCGAACAACTGGCCGAGCAGTCCGACTATCTCGAAACCTGCTACCTGCTGCTCAACGGTGAACTGCCCACCGCCGAGCAGAAAGCCCAGTTCGTGGCCGTGGTCAAGAACCCACACGATGGTTCACGAACAGCTCAAGACCTTTTTCAACGGTTTCCCGCCGCGACGCCCACCCCGATGGCCGTCATGTGTGGCGTAGTCGGCGCCC
	singleton	forest	moss	Rhytidiadelphus loreus	2020	EG2019_16	CATTCTCACCGGCACCGTAGGCCCAGACGTGATCGACGTACGCGGTCTTACCGCCACCGGCCGCTTCACATTCGACACAGGCTTCATGTCGACCGCCTCTTGCGAGTCGAAGATCACCTACATTGATGGTGACAACGCGATCCTGCTGCACCGCGGCTATCCGATCGAACAACTGGCCGAGCAATCGGACTATCTGGAAACCTGCTATCTGCTGCTGAACGGCGAACTGCCAACCGCCGAGCAGAGAGCCCAGTTCGTTGTTGTCGTGAAAAACCACACCATGGTTCACGAACAGCTCAAGACCTTCTTCAACGGCTTCCGCCGCGACGCTCACCCGATGGCGGTGATGTGTGGCGTGGTGGGTGCCC
	singleton	forest	moss	Rhytidiadelphus loreus	2020	EG2019_29	CAATTCTGACGGGTACAGTGGGTCCGGACGTGATCGACGTACGCGGTCTCACCGCCACCGGCCGCTTCACATTTGACCCTGGCTTCATGTTCACGGCATCTTGCGAGTCGAAGATCACCTACATCGATGGTGATAACGGAATCCTGCTTCACCGCGGCTACCCGATCGAGCAACTGGCCGAGCAGTCCGATTATCTGGAAACCTGCTACCTGCTGCTCAATGGCGAACTGCCAACTGCCGAGCAGAAAGCCCAGTTCGTTGCCGTGGTCAAGAACCACACGATGGTTCACGAACAGCTCAAGACCTTTTTCAACGGCTTCCGCCGTGATGCCCACCCGATGGCCGTCATGTGCGGCGTGGTCGGTGCCC
	singleton	forest	moss	Hylocomium splendens	2020	EG2022_01	CCGGTACAGTGGGGTCCGGACGTGATCGACCGTACGCGGCCTGAACGGCCACCGGCCGCTTCACATTTGGACCCTGGTTGTCATGTCCACGGCCTCTTGCGATTCGAAGATCACCTACATCGATGGTGATAATGGCATTCTGCTACACCGCGGCTACCCGATCGAACAACTGGCCGAGCAGTCCGACTATCTCGAAACCTGCTACCTGCTGCTCAACGGTGAACTGCCCACCGCCGAGCAGAAAGCCCAGTTCGTGGCCGTGGTCAAGAACCACACGATGGTTCACGAACAGCTCAAGACCTTTTTCAACTGTTTCCGCCGCGACGCCCACCCGATGGCCGTCATGTGTGGCGTAGTCGGCGCCC
	singleton	forest	moss	Hylocomium splendens	2020	EG2022_05	ATTTCTGACCCGGTACAGTGGGTCCGGACGTGATCGACGTTACGCGGCCTGACCGCCACCGGCCGCTTCACATTTGACCCTGGTTTCATGTCCACGGCCTCTTGCGATTCGAAGATCACCTACATCGATGGTGATAATGGCATTCTGCTACACCGCGGCTACCCGATCGAACAACTGGCCGAGCAGTCCGACTATCTCGAAACCTGCTACCTGCTGCTCAACGGTGAACTGCCCACCGCCGAGCAGAAAGCCCAGTTCGTGGCCGTGGTCAAGAACCACACGATGGTTCACGAACAGCTCAAGACCTTTTTCAACTGTTTCCGCCGCGACGCCCACCCGATGGCCGTCATGTGTGGCGTAGTCGGCGCCC
	singleton	forest	moss	Hylocomium splendens	2020	EG2022_10	CAATTCTGACGGGTACAGTGGGTCCGGACGTGATCGACGTACGCGGTCTCACCGCCACCGGCCGCTTCACATTTGACCCTGGCTTCATGTCCACGGCATCTTGCGAGTCGAAGATCACCTACATCGATGGTGATAACGGAATCCTGCTTCACCGCGGCTACCCGATCGAGCAACTGGCCGAGCAGTCCGATTATCTGGAAACCTGCTACCTGCTGCTCAATGGCGAACTGCCAACTGCCGAGCAGAAAGCCCAGTTCGTTGCCGTGGTCAAGAACCACACGATGGTTCACGAACAGCTCAAGACCTTTTTCAACGGCTTCCGCCGTGATGCCCACCCGATGGCCGTCATGTGCGGCGTGGTCGGTGCCC
	singleton	forest	moss	Hylocomium splendens	2020	EG2022_28	CATTTCTGACCGGTACAGTGGGTCCGGGACGTGATCGACGTCCGCGGCCTGACCGGCACCGGCCGCTTCACATTTGACCCTGGTTTCATGTCCACGGCCTCTTGCGATTCGAAGATCACCTACATCGATGGTGATAATGGCATTCTGCTACACCGCGGCTACCCGATCGAACAACTGGCCGAGCAGTCCGACTATCTCGAAACCTGCTACCTGCTGCTCAACGGTGAACTGCCCACCGCCGAGCAGAAAGCCCAGTTCGTGGCCGTGGTCAAGAACCACACGATGGTTCACGAACAGCTCAAGACCTTTTTCAACTGTTTCCGCCGCGACGCCCACCCGATGGCCGTCATGTGTGGCGTAGTCGGCGCCC
	singleton	BoreoHeathMossGrass	plant	Alchemilla alpina	2020	HV2005_10	CATTCTCACCGGCACCGTAGGCCCCGACGTGATCGACGTACGTGGTCTCACAGCCACCGGCCGCTTCACATTCGACCCAGGCTTCATGTCGACCGCCTCTTGCGAGTCGAAGATCACCTACATTGATGGTGACAACGGGATCCTGCTGCACCGCGGCTATCCGATCGAACAACTGGCCGAGCAATCGGACTACCTGGAAACGTGCTATCTGCTACTGAACGGCGAGCTGCCAACCGCCGAGCAGAAAGCCCAGTTCGTTGTTGTCGTAAAGAACCACACCATGGTTCACGAACAGCTCAAGACCTTCTTCAACGGCTTCCGCCGCGACGCTCACCCGATGGCGGTGATGTGTGGTGTCGTGGGTGCCC
	singleton	GrazedPasture	plant	farm grass_1	2018	ISL0014	CATTCTCACCGGCACCGTAGGCCCCGACGTGATCGACGTACGTGGTCTCACAGCCACCGGCCGCTTCACATTCGACCCAGGCTTCATGTCGACCGCCTCTTGCGAGTCGAAGATCACCTATATTGATGGTGACAACGGGATCCTGCTGCACCGCGGCTATCCGATCGAACAACTGGCCGAGCAATCGGACTACCTGGAAACGTGCTATCTGCTACTGAACGGCGAGCTGCCAACCGCCGAGCAGAAAGCCCAGTTCGTTGTTGTCGTGAAAAACCACACCATGGTTCACGAACAGCTCAAGACCTTTTTCAACGGCTTCCGCCGCGACGCTCACCCGATGGCGGTGATGTGTGGGGTGGTGGGTGCCC
	singleton	OroborealAlpineGlacier	plant	sparse mixed grass-1	2018	ISL0081	CAATACTGACCGGTACAGTGGGTCCGGACGTGATCGACGTACGCGGTCTGACCGCCACCGGCCGCTTCACATTTGACCCTGGTTTCATGTCCACGGCCTCTTGCGAGTCGAAGATCACCTACATCGATGGTGACAACGGAATTCTGCTGCACCGCGGCTACCCGATCGAACAACTGGCCGAGCAGTCCGATTACCTCGAGACCTGCTACCTGTTGCTCAACGGCGAGCTGCCAACCGCCGAACAGAAAGCCCAGTTCGTGGCCGTGGTCAAGAACCACACAATGGTTCACGAACAACTCAAGACCTTCTTCAACGGCTTTCGCCGTGACGCCCACCCGATGGCCGTCATGTGCGGTGTAGTCGGCGCCC
	singleton	BoreoHeathMossGrass	moss	moss from mixed stand - location_3	2018	ISL0282	CAATACTGACCGGTACAGTGGGTCCGGACGTGATCGACGTACGCGGTCTGACCGCCACCGGCCGCTTCACATTTGACCCTGGTTTCATGTCCACGGCCTCTTGCGAGTCGAAGATCACCTACATCGATGGTGACAACGGAATTCTGCTGCACCGCGGCTACCCGATCGAACAACTGGCCGAGCAGTCCGACTACCTCGAGACCTGCTACCTGTTGCTCAACGGCGAGCTGCCAACCGCCGAACAGAAAGCCCAGTTCGTGGCCGTGGTCAAGAACCACACAATGGTTCACGAACAACTCAAGACCTTCTTCAACGGCTTTCGCCGTGACGCCCACCCGATGGCCGTCATGTGCGGTGTAGTCGGCGCCC
	singleton	GrazedPasture	plant	pasture grass-1	2019	ISL0427	CAATTCTGACCGGTACAGTGGGTCCGGACGTGATCGACGTACGCGGTCTCACCGCCACCGGCCGCTTCACATTCGACCCTGGCTTCATGTCGACCGCCTCTTGCGAGTCGAAGATCACCTACATCGATGGTGACAACGGAATCCTGCTGCACCGCGGCTACCCTATCGAACAACTGGCCCAGCACTCCGACTACCTGGAGACCTGCTACCTGCTGCTCAATGGCGAATTGCCGACCGCCGAGCAGAAAGCCCAGTTCGTCGCCGTGGTCAAGAACCACACGATGGTCCACGAACAGCTCAAGACCTTTTTCAACGGCTTCCGTCGCGACGCCCACCCGATGGCCGTAATGTGCGGCGTGGTCGGCGCGC
	singleton	GrazedPasture	plant	pasture grass-1	2019	ISL0429	CAATTCTGACCGGTACAGTGGGTCCGGACGTGATCGACGTACGCGGCCTGACCGCCACCGGCCGCTTCACATTTGACCCTGGCTTCATGTCCACGGCCTCTTGCGATTCGAAGATCACCTACATCGATGGTGATAATGGCATTCTGCTACACCGGGGCTACCCGATCGAACAACTCGCCGAGCAGTCCGACTACCTCGAAACCTGCTACCTGCTGCTCAACGGTGAACTGCCTACCGCCGAGCAGAAAGCCCAGTTCGTGGCCGTGGTCAAGAACCACACGATGGTTCACGAACAGCTCAAGACCTTTTTCAACGGTTTCCGCCGCGACGCCCACCCGATGGCCGTCATGTGTGGCGTAGTCGGCGCCC
	singleton	GrazedPasture	plant	pasture grass-1	2019	ISL0439	CAATTCTGACCGGTACAGTGGGTCCGGACGTGATCGACGTACGCGGCCTGACCGCCACCGGCCGCTTCACATTTGACCCTGGTTTCATGTCCACGGCCTCTTGCGATTCGAAGATCACCTACATCGATGGTGATAATGGCATTCTGCTACACCGCGGCTACCCGATCGAACAACTGGCCGAGCAGTCCGACTACCTCGAAACCTGCTACCTGCTGCTCAACGGTGAACTGCCTACCGCCGAGCAGAAAGCCCAGTTCGTGGCCGTGGTCAAGAACCACACGATGGTTCACGAACAGCTCAAGACCTTTTTCAACGGTTTCCGCCGCGACGCCCACCCGATGGCCGTCATGTGTGGCGTAGTCGGCGCCC
	singleton	GrazedPasture	plant	pasture grass-2	2019	ISL0450	CAATTCTGACCGGTACAGTGGGTCCGGACGTGATCGACGTACGCGGCCTGACCGCCACCGGCCGCTTCACATTTGACCCTGGTTTCATGTCCACGGCCTCTCGCGATTCGAAGATCACCTACATCGATGGTGATAATGGCATTCTGCTACACCGCGGCTACCCGATCGAACAACTGGCCGAGCAGTCCGACTATCTCGAAACCTGCTACCTGCTGCTCAACGGTGAACTGCCCACCGCCGAGCAGAAAGCCCAGTTCGTGGCCGTGGTCAAGAACCACACGATGGTTCACGAACAGCTCAAGACCTTTTTCAACGGTTTCCGCCGCGACGCCCACCCGATGGCCGTCATGTGTGGCGTAGTCGGCGCCC
	singleton	GrazedPasture	plant	pasture grass-2	2019	ISL0455	CAATTCTGACGGGTACAGTGGGTCCGGACGTGATCGACGTACGCGGTCTCACCGCCACCGGCCGCTTCACATTTGACCCTGGCTTCATGTCCACGGCATCTTGCGAGTCGAAGATCACCTACATCGATGGTGATAACGGAATTCTGCTTCACCGCGGCTACCCGATCGAACAACTGGCCGAGCAGTCCGATTATCTGGAAACCTGCTACCTGCTGCTCAATGGCGAATTGCCAACCGCCGAGCAGAAAGCCCAGTTCGTTGCCGTGGTCAAAAACCACACGATGGTTCACGAACAGCTCAAGACCTTTTTCAACGGTTTCCGCCGTGATGCCCACCCGATGGCCGTCATGTGCGGCGTAGTCGGCGCCC
	singleton	OroborealAlpineGlacier	moss	Hylocomium splendens	2020	SU2003_19	CAATTCTGACGGGTACAGTGGGTCCGGACGTGATCGACGTACGCGGTCTCACCGCCACCGGCCGCTTCACATTTGACCCTGGCTTCATGTCCACGGCATCTTGCGAGTCGAAGATCACCTACATCGATGGCGATAACGGAATCCTGCTTCACCGCGGCTACCCGATCGAACAACTGGCCGAGCAGTCCGATTATCTGGAAACCTGCTACCTGCTGCTCAATGGCGAATTGCCAACAGCCGAGCAGAAAGCCCAGTTCGTTGCCGTGGTCAAGAACCACACGATGGTTCACGAACAGCTCAAGACCTTTTTCAACGGCTTCCGTCGTGATGCCCACCCGATGGCCGTCATGTGCGGTGTAGTCGGCGGCC
	singleton	OroborealAlpineGlacier	moss	Hylocomium splendens	2020	SU2003_30	CAATACTGACCGGTACAGTGGGTCCGGACGTGATCGACGTACGCGGTCTGACCGCCACCGGCCGCTTCACATTTGACCCTGGTTTCATGTCCACGGCCTCTTGCGAGTCGAAGATCACCTACATTGATGGTGACAACGGAATTCTGCTGCACCGCGACTACCCGATCGAACAACTGGCCGAGCAGTCCGATTACCTCGAGACCTGCTACCTGTTGCTCAACGGCGAGCTGCCAACCGCCGAACAGAAAGCCCAGTTCGTGGCCGTGGTCAAGAACCACACGATGGTTCACGAACAACTCAAGACCTTCTTCAACGGCTTTCGCCGTGACGCCCACCCGATGGCCGTCATGTGCGGTGTAGTCGGCGCCC
	singleton	OroborealAlpineGlacier	plant	Empetrum nigrum	2020	SU2005_01	CAATTCTGACGGGTACAGTGGGTCCGGACGTGATCGACGTACGCGGTCTCACCGCCACCGGCCGCTTCACATTCGACCCTGGCTTCATGTCCACGGCATCTTGCGAGTCGAAGATCACCTACATCGATGGCGATAACGGAATCCTGCTTCACCGCGGCTACCCGATCGAACAACTGGCCGAGCAGTCCGATTATCTGGAAACCTGCTACCTGCTGCTCAATGGCGAATTGCCAACAGCCGAGCAGAAAGCCCAGTTCGTTGCTGTGGTCAAGAACCACACGATGGTTCACGAACAGCTCAAGACCTTTTTCAACGGCTTCCGTCGTGATGCCCACCCGATGGCCGTCATGTGCGGCGTAGTCGGCGCCC
